# Supplementary material
Source: PubMed Central journal article supplement (PMC6682154)
Supplement: ao9b01086_si_001.pdf [file ao9b01086_si_001.pdf]

## Design of *L*-lysine based organogelators and their applications in drug release processes.

Seref Kaplan, Mehmet Colak, Halil Hosgoren and Necmettin Pirinccioglu\*

*Department of Chemistry, Faculty of Science, Dicle University, 21280 Diyarbakir, TURKEY*

\*Corresponding Address

Department of Chemistry, Faculty of Science, Dicle University, 21280 Diyarbakir, TURKEY

e-mail. pirincn@dicle.edu.tr, phone. +90 (0412) 2488550 (ext.3055), fax. +90 (0412)

2488300

### Table of Contents:

| S. No | Contents                                                                                                                 | Page No  |
|-------|--------------------------------------------------------------------------------------------------------------------------|----------|
| 1     | <sup>1</sup> H, <sup>13</sup> C NMR and IR spectra of all the compounds and their GC-MS data                             | S3-S22   |
| 2     | The effect of gelator concentration on gel-sol transition temperature in the solvents studied                            | S23-27   |
| 3     | van't Hoff plots for the gels prepared in the solvents studied                                                           | S28-S31  |
| 4     | The time-dependent release rate of Npx from the gels in the solvent studied at pH 7.4 (0.1 M phosphate buffer) and 25 °C | S32-S34  |
| 5     | 3D structure of octamer in mol2 format obtained from AM1 calculation                                                     | S35-S75  |
| 6     | 3D structure of octamer in 1,2-propandiol obtained from MD simulations                                                   | S76-S831 |

## 1. $^1\text{H}$ , $^{13}\text{C}$ NMR and IR spectra of all the compounds and their GC-MS data

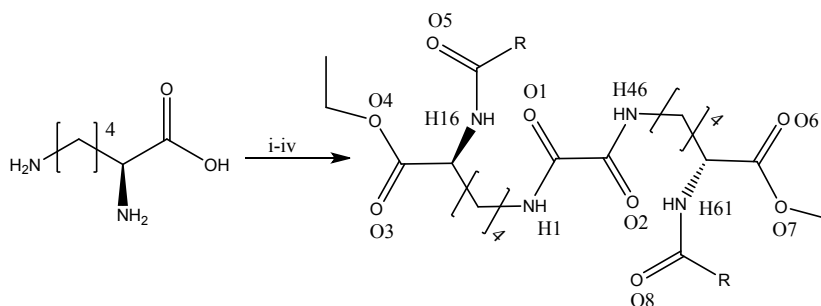

**Scheme 1.** The organogelators prepared in this study. i) dimethyl oxalate; ii) HCl/EtOH;  $\text{Na}_2\text{CO}_3/\text{CHCl}_3$ ; iv)  $\text{RCOCl}$ .  $\text{R}=\text{C}_{11}\text{H}_{23}$  ( $\text{N}^2\text{L}/\text{N}^6\text{Lys}$ ),  $\text{R}=\text{C}_{13}\text{H}_{27}$  ( $\text{N}^2\text{M}/\text{N}^6\text{Lys}$ ) and  $\text{R}=\text{C}_{15}\text{H}_{29}$  ( $\text{N}^2\text{P}/\text{N}^6\text{Lys}$ ).

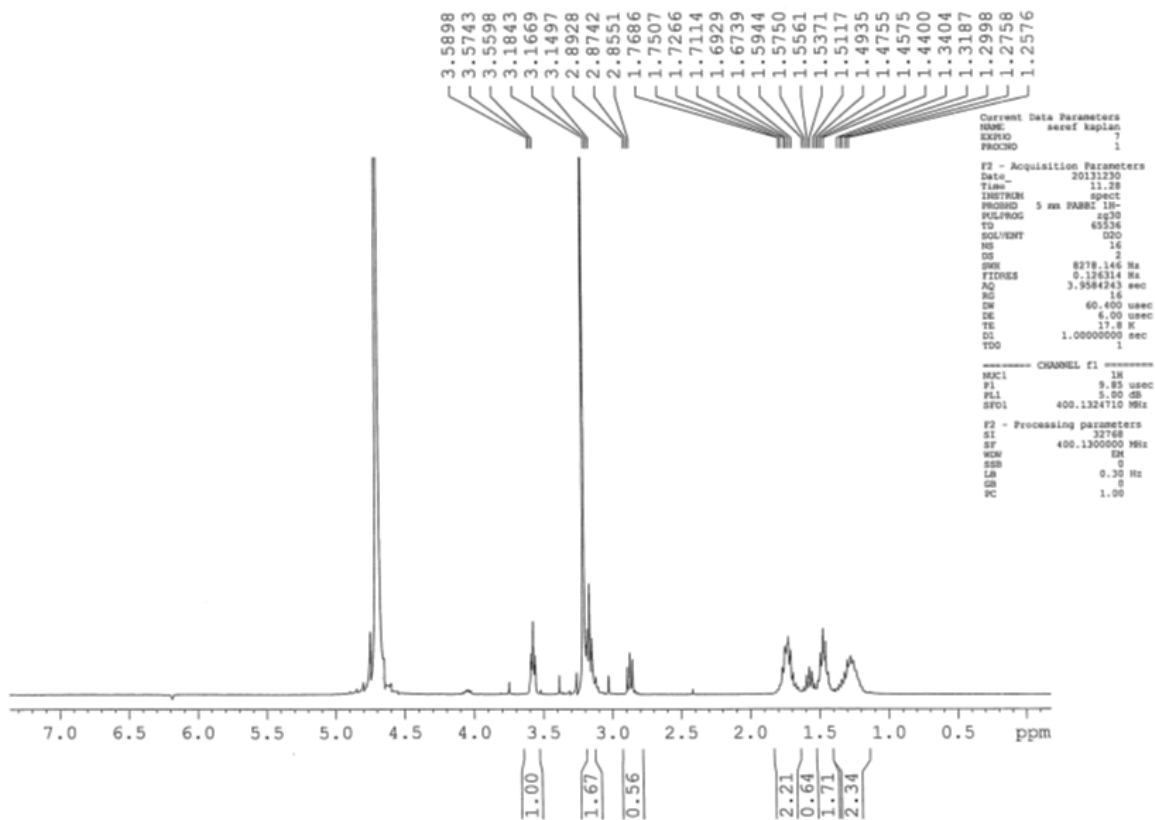

**Figure S1.**  $^1\text{H}$  NMR spectrum of Bis( $\text{N}^6$ -*L*-Lysyl)oxalyl amide (**1**).

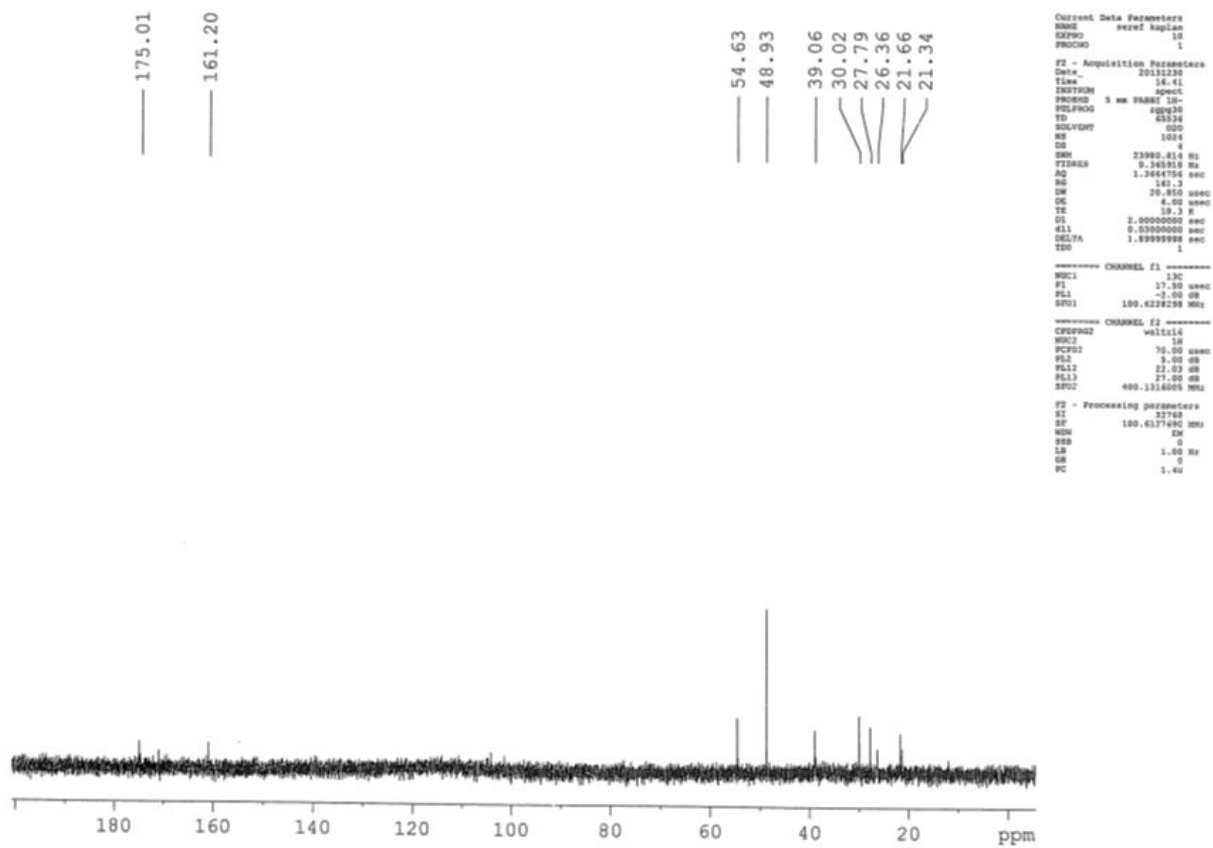

**Figure S2.**  $^{13}\text{C}$  NMR spectrum of Bis( $\text{N}^6$ -*L*-Lysyl)oxalyl amide (**1**).

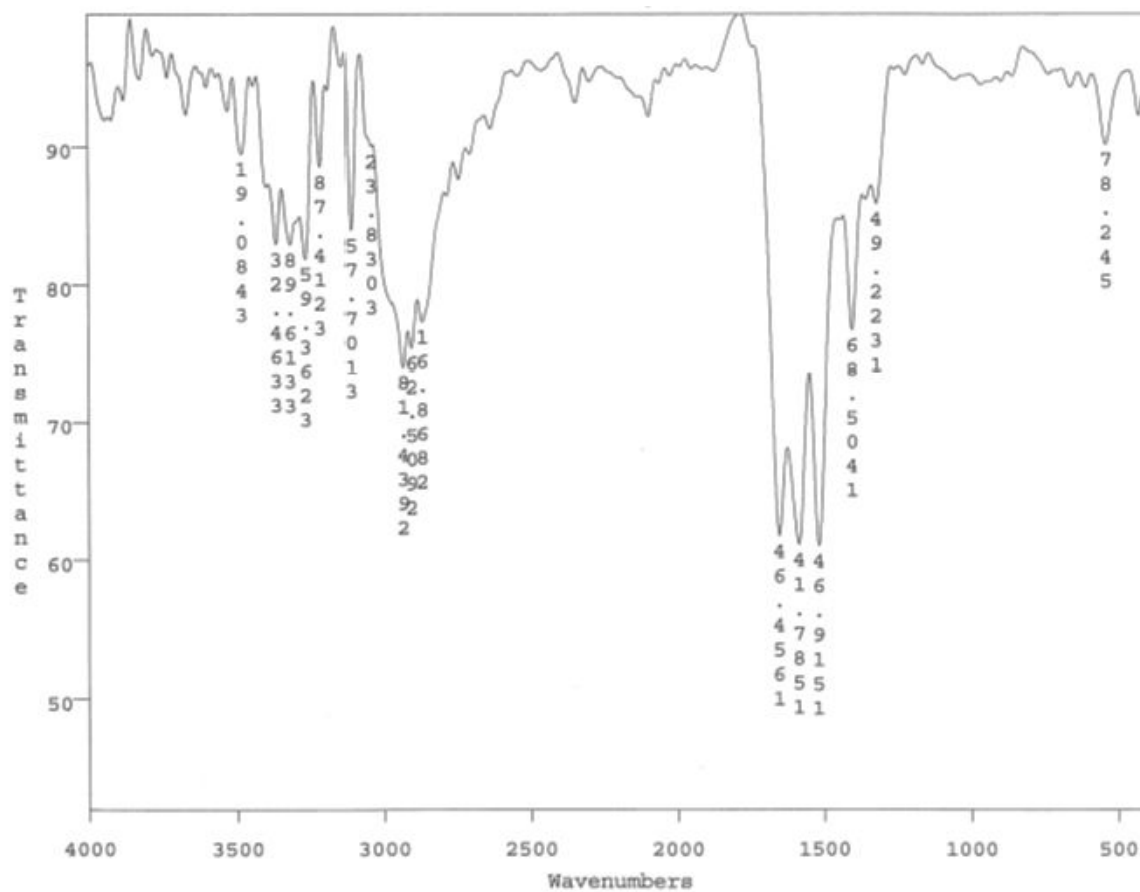

**Figure S3.** IR spectrum of Bis( $N^6$ -*L*-Lysyl)oxalyl amide (**1**).

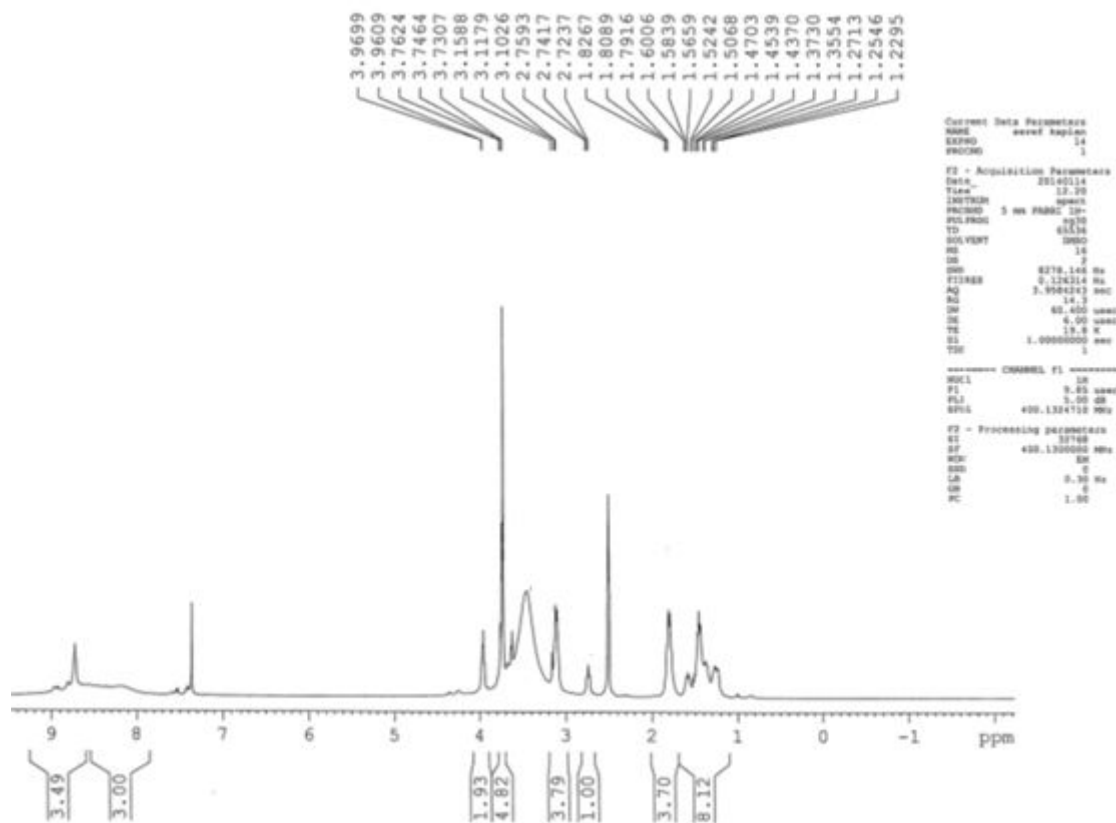

**Figure S4.**  $^1\text{H}$  NMR spectrum of Bis( $\text{N}^6$ -*L*-Lysyl-ethylester)oxalylamide hydrochloride salt (2).



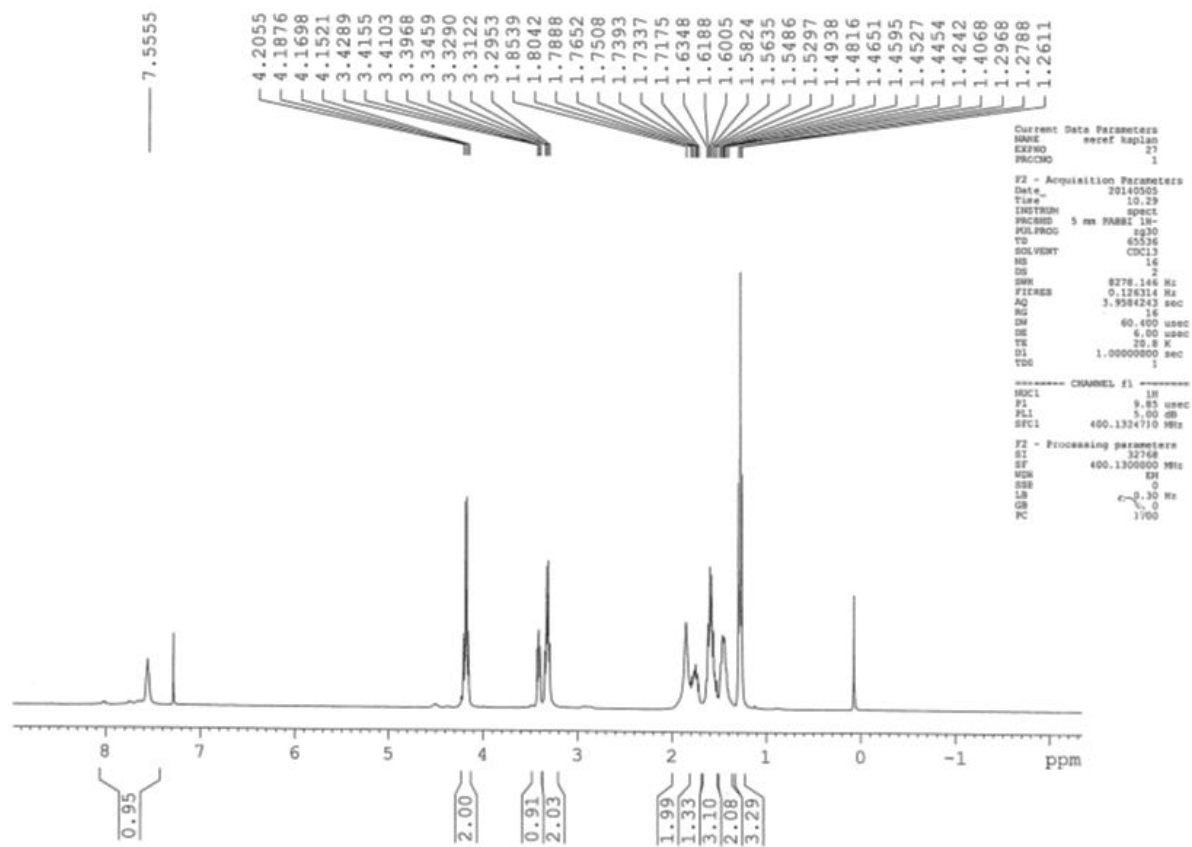

**Figure S6.**  $^1\text{H}$  NMR spectrum of Bis( $\text{N}^6$ -*L*-Lysyl ethylester)oxalyl amide (**3**).



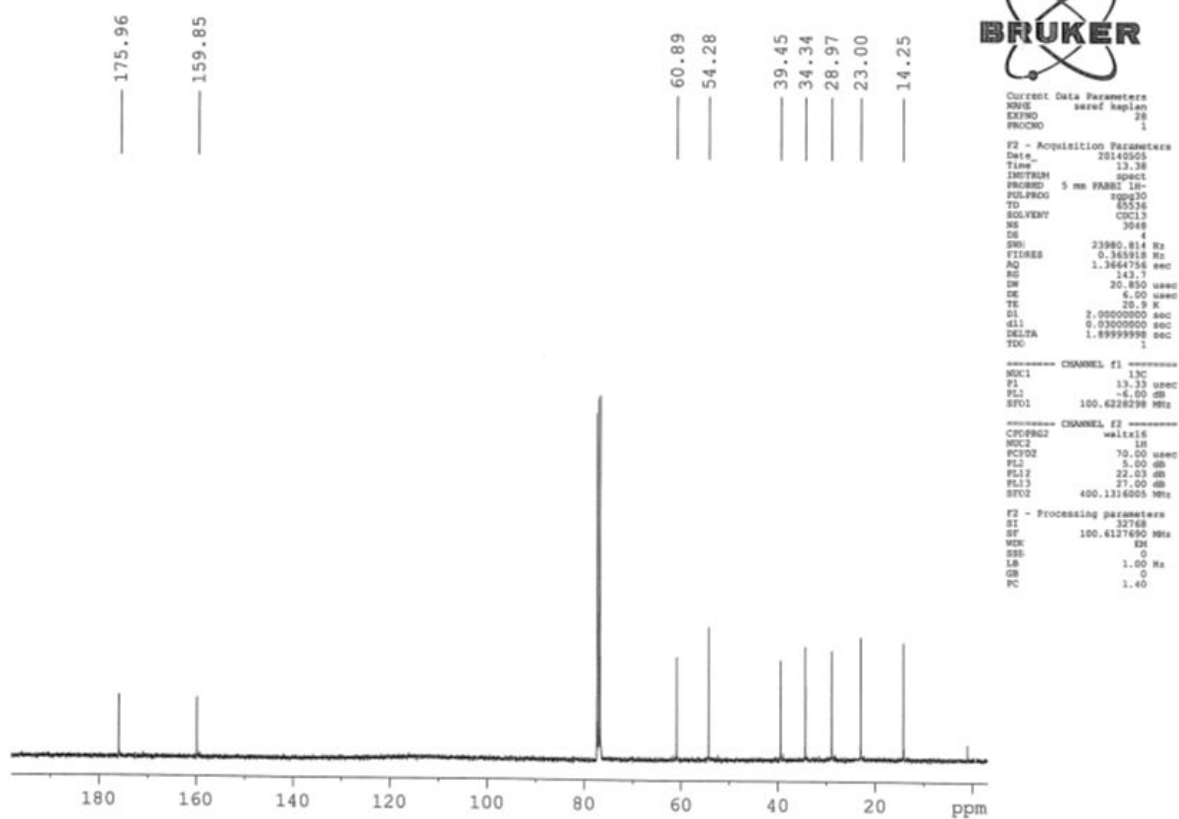

**Figure S6.**  $^{13}\text{C}$  NMR spectrum of Bis( $\text{N}^6$ -*L*-Lysyl ethylester)oxalyl amide (**3**).

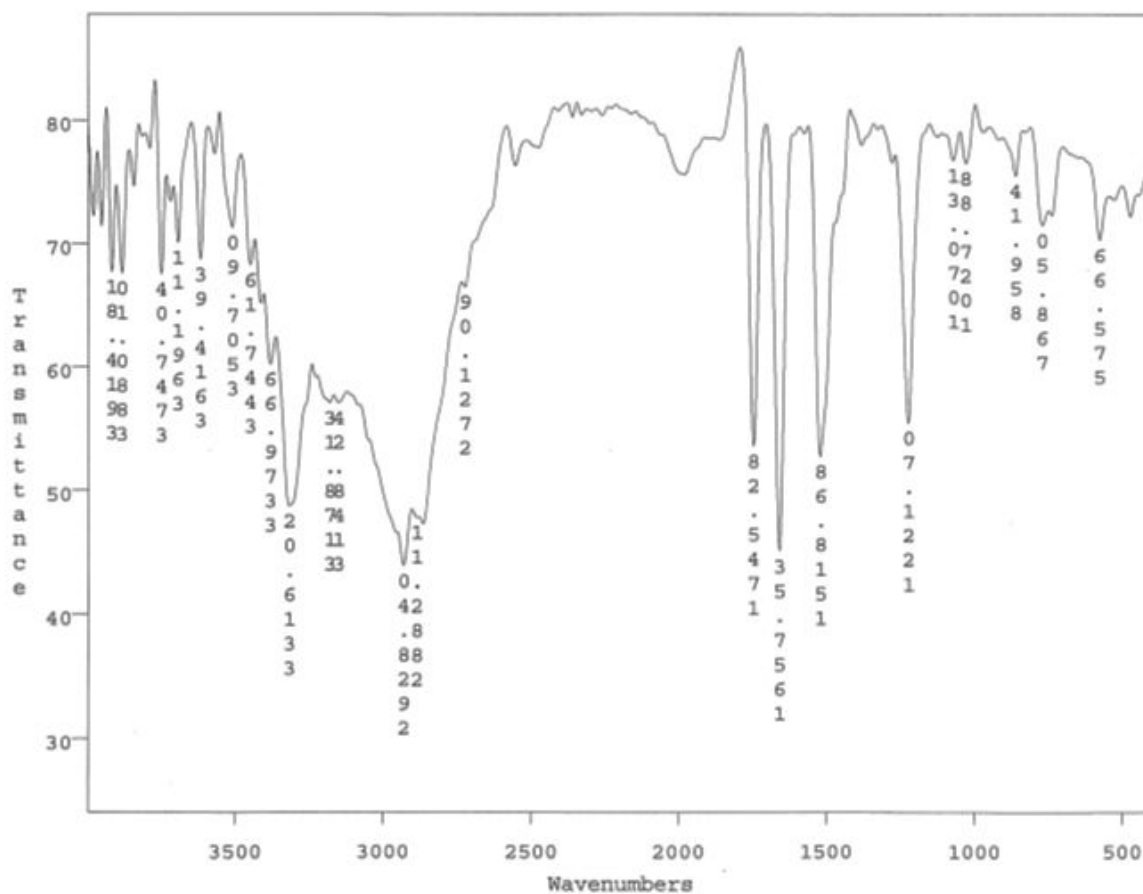

Figure S7. IR spectrum of Bis( $N^6$ -L-Lysyl ethylester)oxalyl amide (**3**).

Sample Information

Acquired by : System Administrator  
Date Acquired : 05.12.2014 12:46:06  
Sample Type : Unknown  
Level# : 0  
Sample Name : L  
Sample ID : L  
ISTD Amount : (Level Conc.)  
Sample Amount : 1  
Dilution Factor : 1  
Tray# : 1  
Vial# : 61  
Injection Volume : 2  
Data File : L.lcd  
Method File : seref.LMP.lcm  
Original Method File : seref.LMP.lcm  
Report Format File : Report.lsr  
Tuning File : autotune 31032014.lct  
Processed by : System Administrator  
Date Processed : 05.12.2014 12:47:08

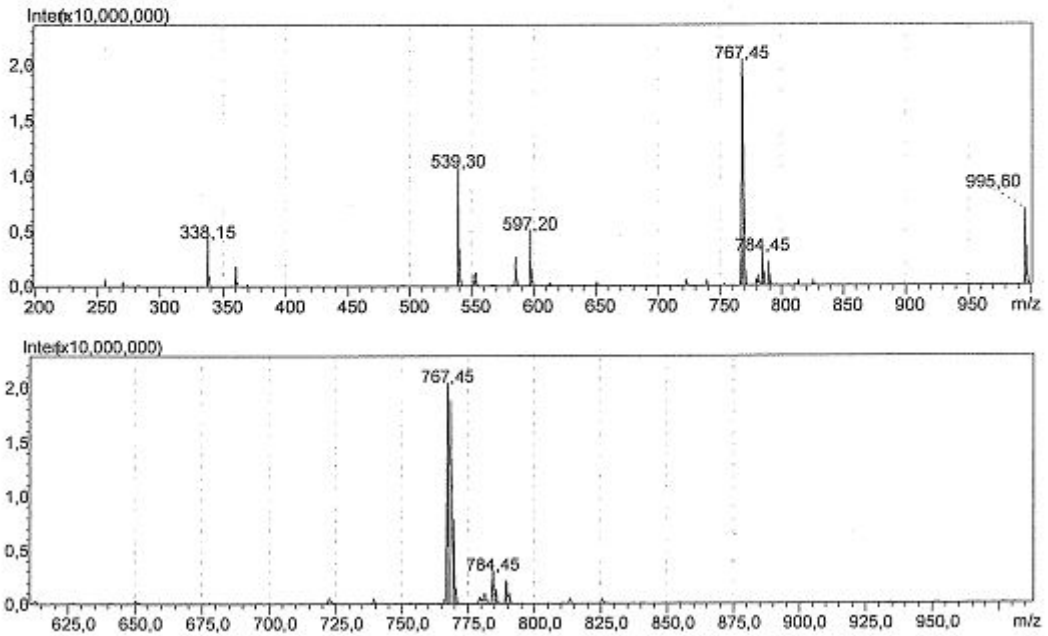

Figure S8. GC-MS data of N<sup>2</sup>L/N<sup>6</sup>Lys.

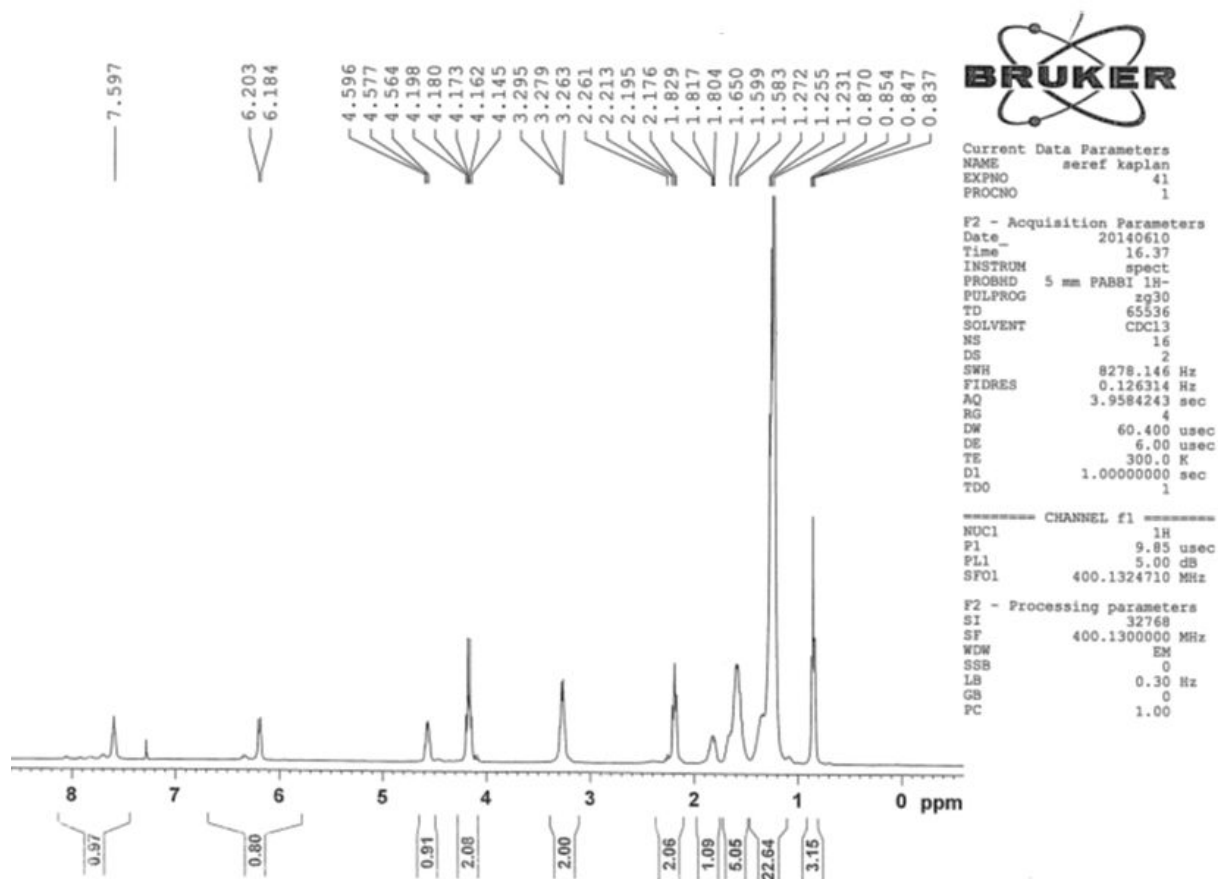

Figure S9.  $^1\text{H}$  NMR spectrum of  $\text{N}^2\text{L}/\text{N}^6\text{Lys}$ .

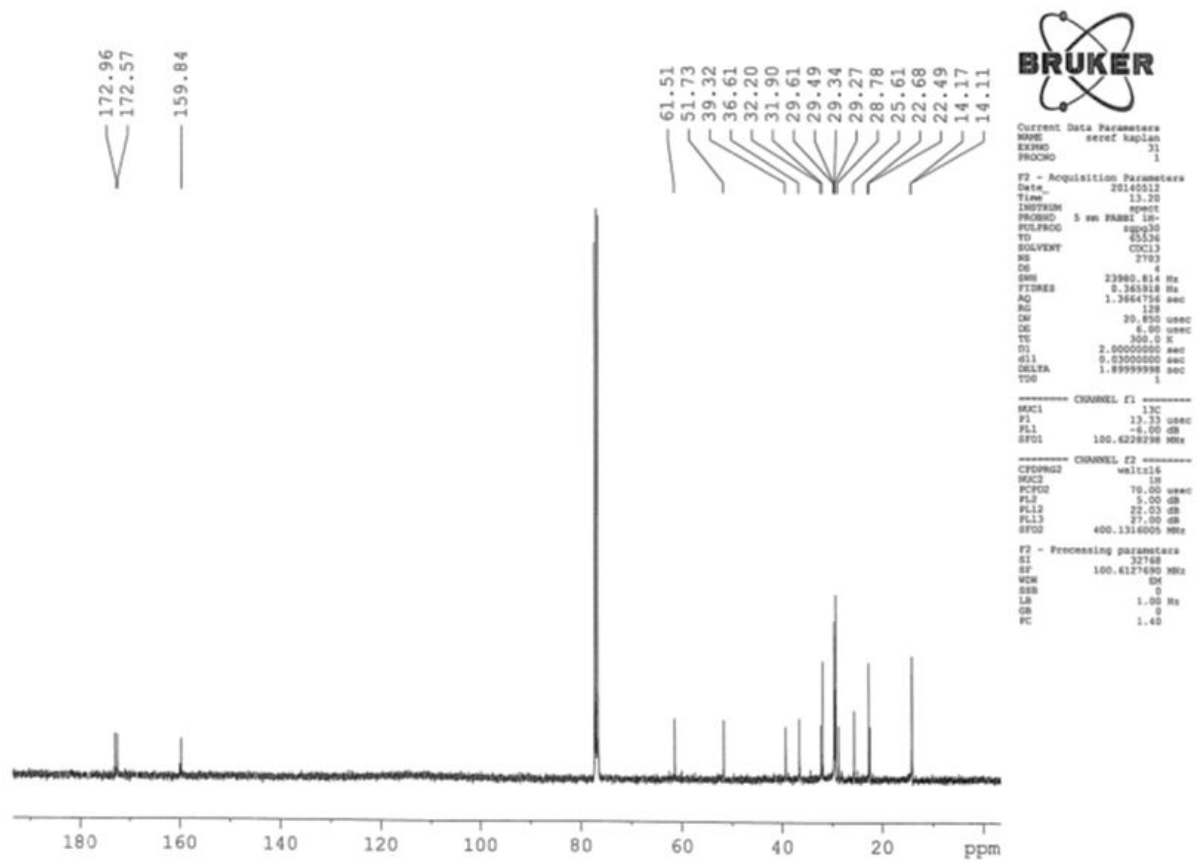

**Figure S10.**  $^{13}\text{C}$  NMR spectrum of  $\text{N}^2\text{L}/\text{N}^6\text{Lys}$ .

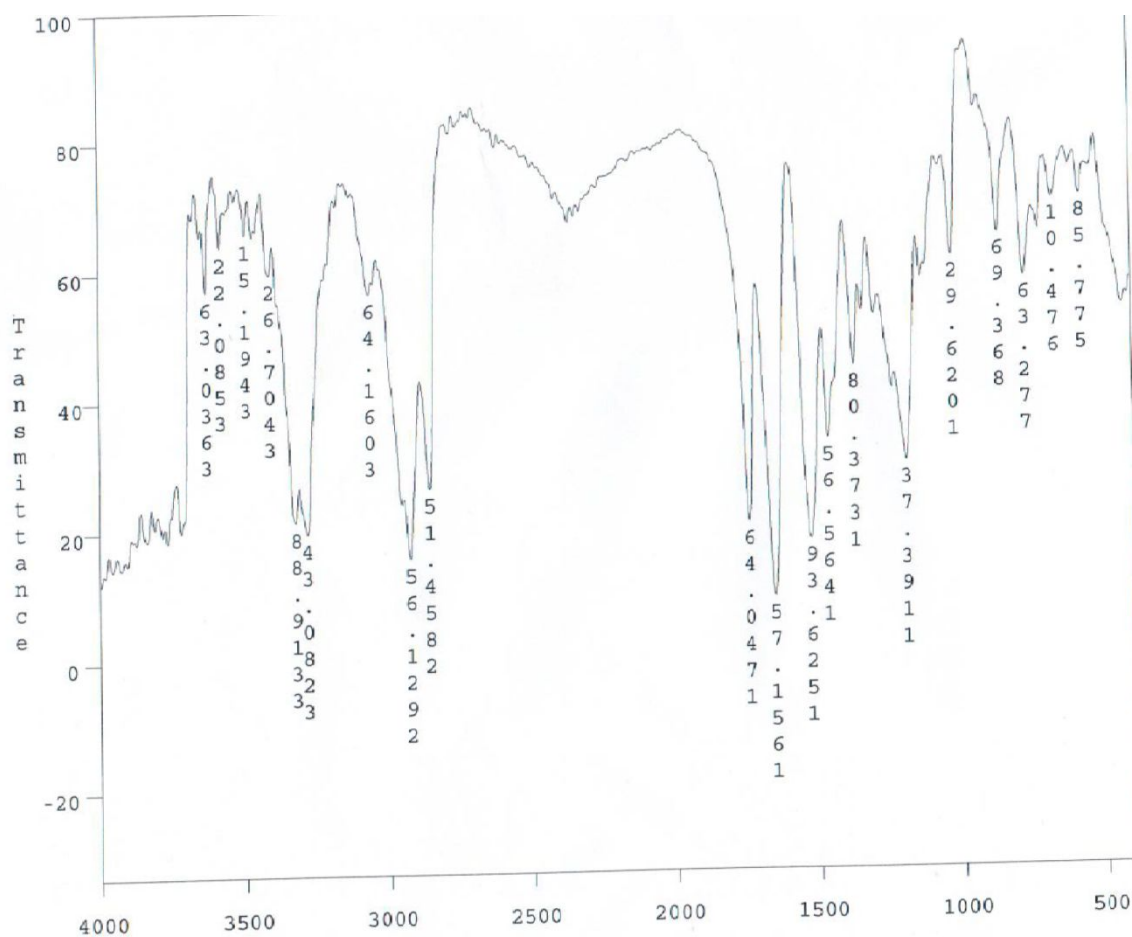

Figure S11. IR spectrum of N<sup>2</sup>L/N<sup>6</sup>Lys.

Sample Information

Acquired by : System Administrator  
Date Acquired : 05.12.2014 12:47:55  
Sample Type : Unknown  
Level# : 0  
Sample Name : M  
Sample ID : M  
ISTD Amount : (Level1 Conc.)  
Sample Amount : 1  
Dilution Factor : 1  
Tray# : 1  
Vial# : 62  
Injection Volume : 2  
Data File : M.lcd  
Method File : seref.LMP.lcm  
Original Method File : seref.LMP.lcm  
Report Format File : Report.lsr  
Tuning File : autotune 31032014.lct  
Processed by : System Administrator  
Date Processed : 05.12.2014 12:48:57

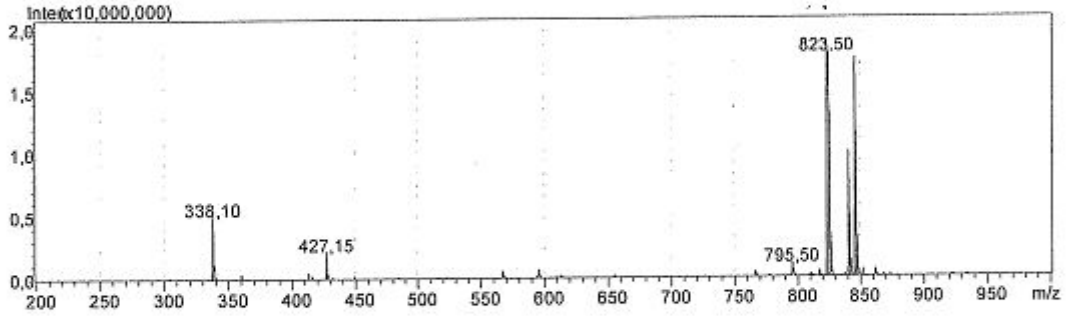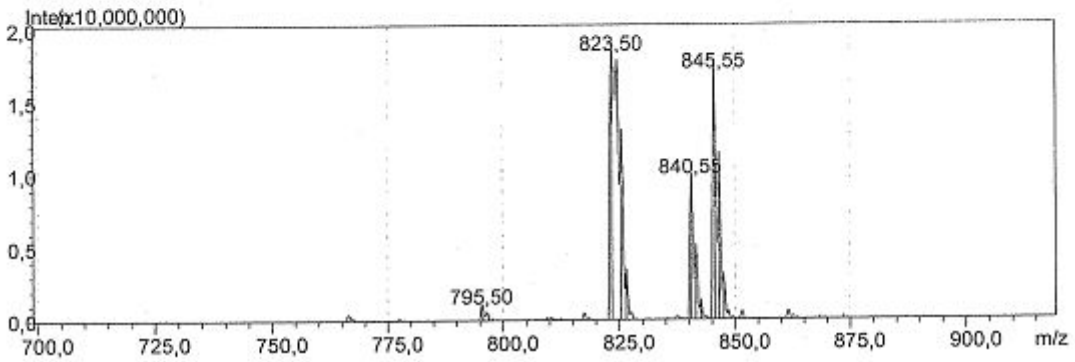

Figure S12. GC-MS data of N<sup>2</sup>M/N<sup>6</sup>Lys.

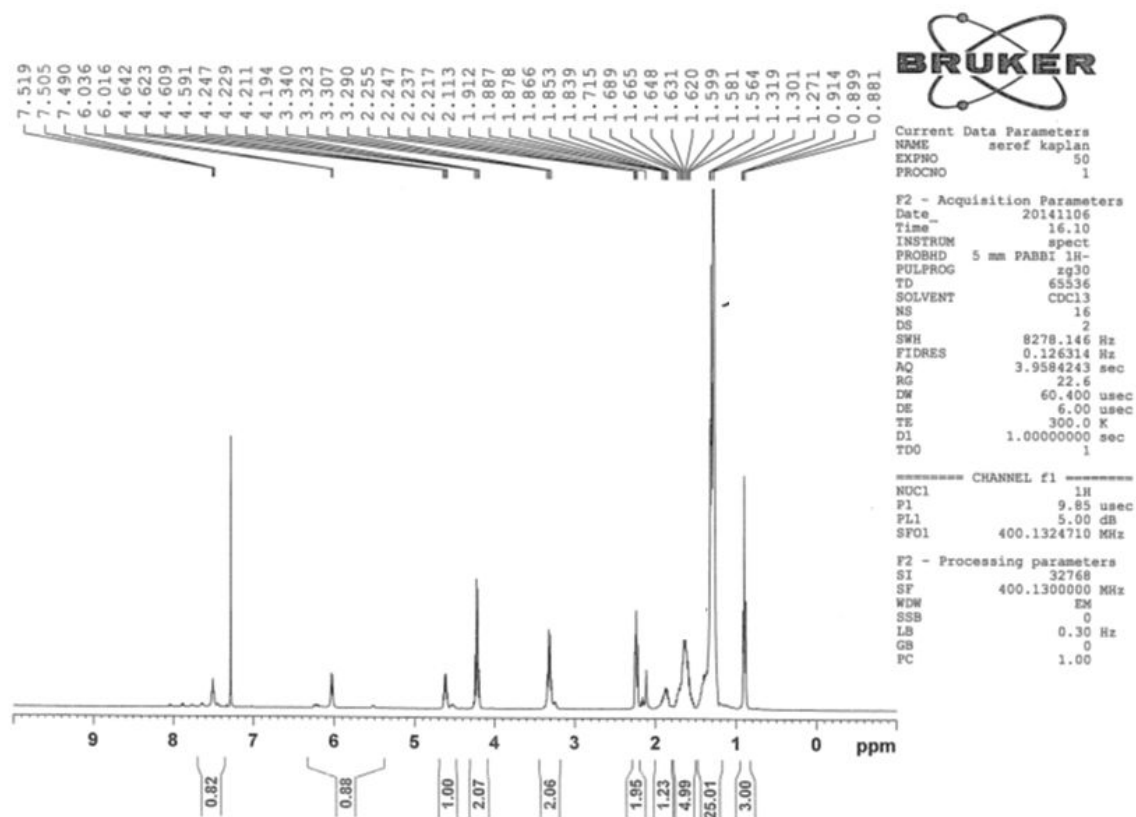

**Figure S13.**  $^1\text{H}$  NMR spectrum of  $\text{N}^2\text{M}/\text{N}^6\text{Lys}$ .



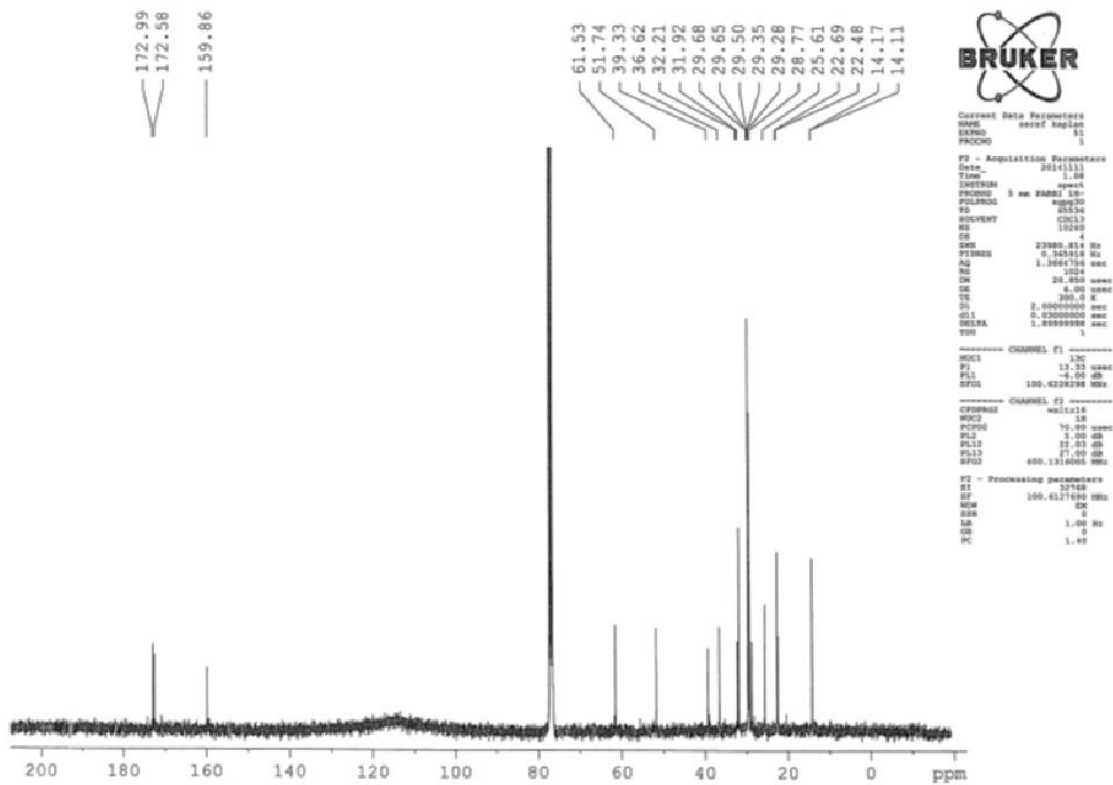

Figure S14.  $^{13}\text{C}$  NMR spectrum of  $\text{N}^2\text{M}/\text{N}^6\text{Lys}$ .

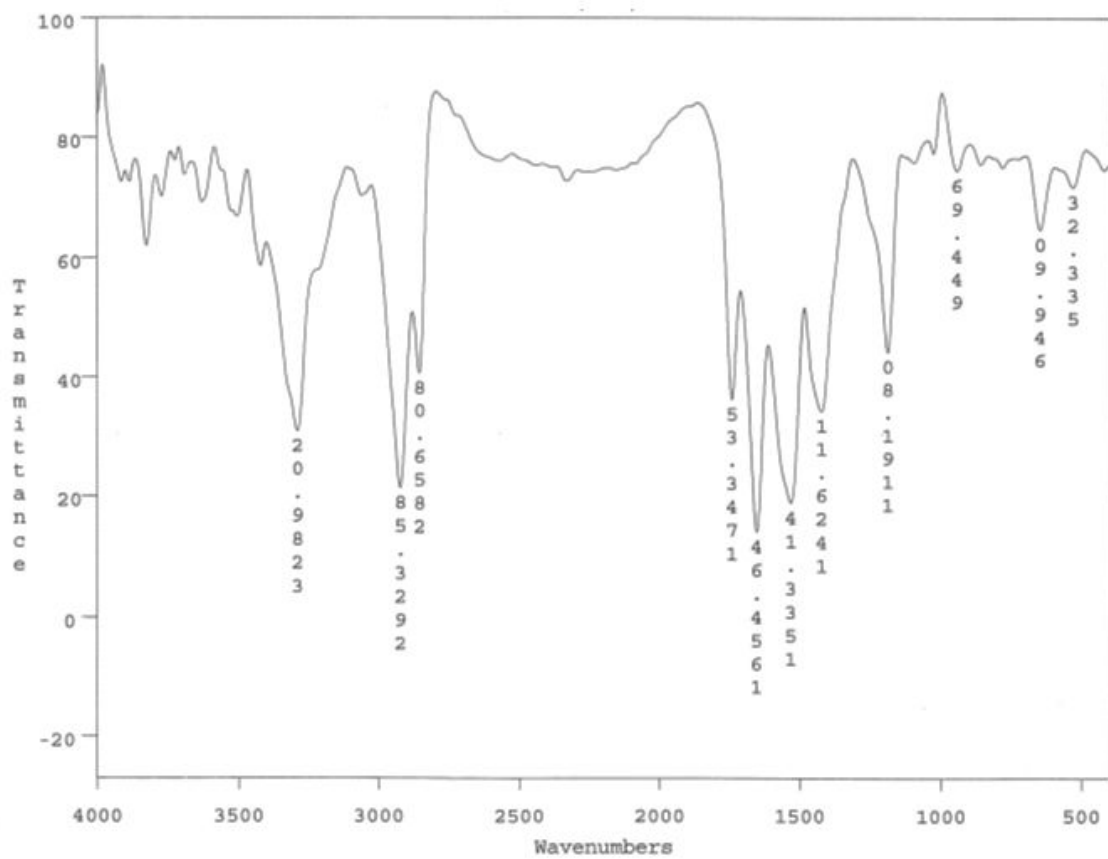

Figure S15. IR spectrum of N<sup>2</sup>M/N<sup>6</sup>Lys.

|                      |   |                       |
|----------------------|---|-----------------------|
|                      |   | Sample Information    |
| Acquired by          | : | System Administrator  |
| Date Acquired        | : | 05.12.2014 12:49:28   |
| Sample Type          | : | Unknown               |
| Level#               | : | 0                     |
| Sample Name          | : | P                     |
| Sample ID            | : | P                     |
| ISTD Amount          | : | (Level1 Conc.)        |
| Sample Amount        | : | 1                     |
| Dilution Factor      | : | 1                     |
| Tray#                | : | 1                     |
| Vial#                | : | 63                    |
| Injection Volume     | : | 2                     |
| Data File            | : | P1cd                  |
| Method File          | : | seref.LMP1cm          |
| Original Method File | : | seref.LMP1cm          |
| Report Format File   | : | Report.lsr            |
| Tuning File          | : | autotune_31032014.lct |
| Processed by         | : | System Administrator  |
| Date Processed       | : | 05.12.2014 12:50:29   |

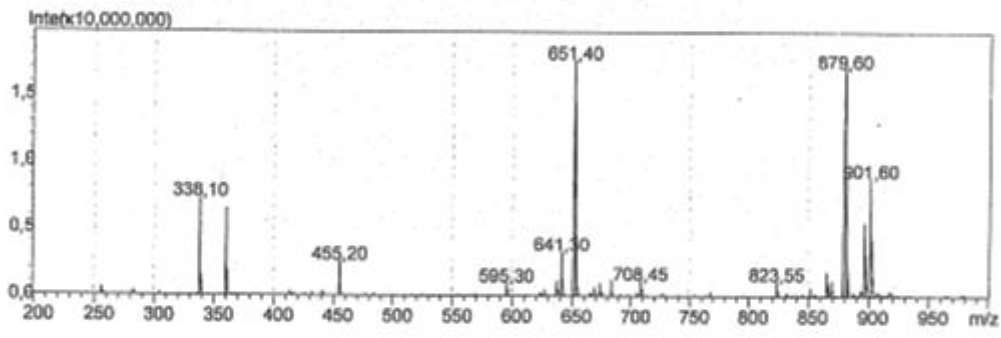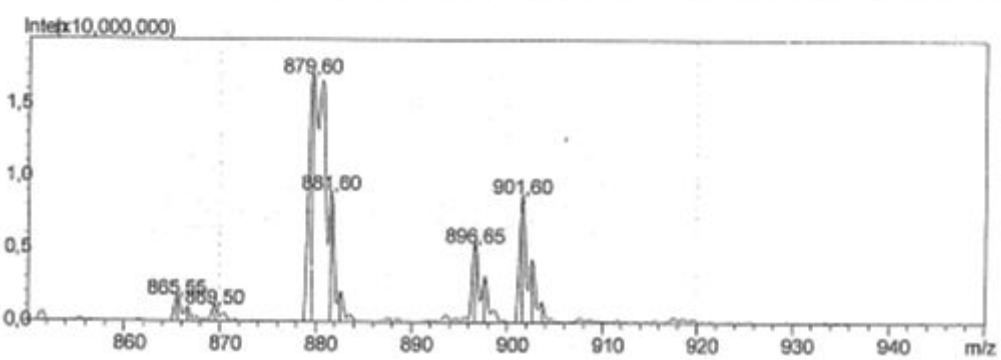

Figure S16. GC-MS data of N<sup>2</sup>P/N<sup>6</sup>Lys.

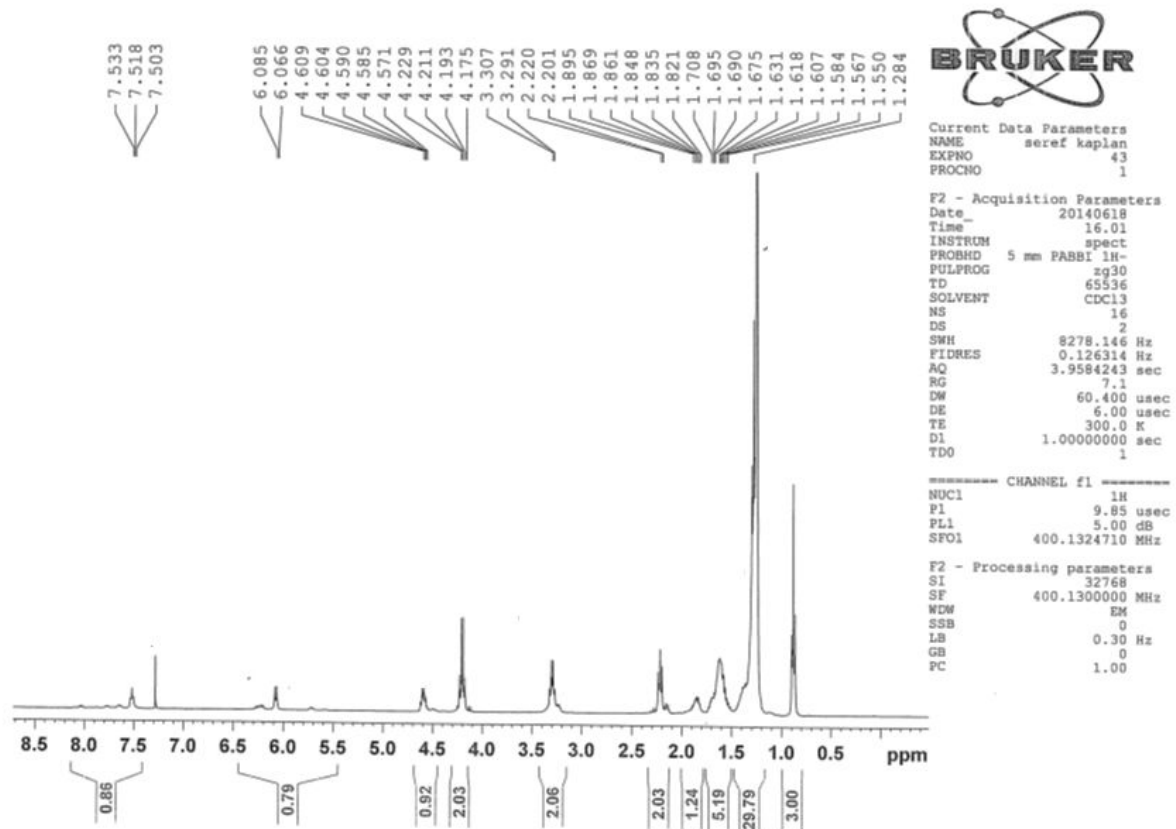

Figure S17.  $^1\text{H}$  NMR spectrum of  $\text{N}^2\text{P}/\text{N}^6\text{Lys}$ .

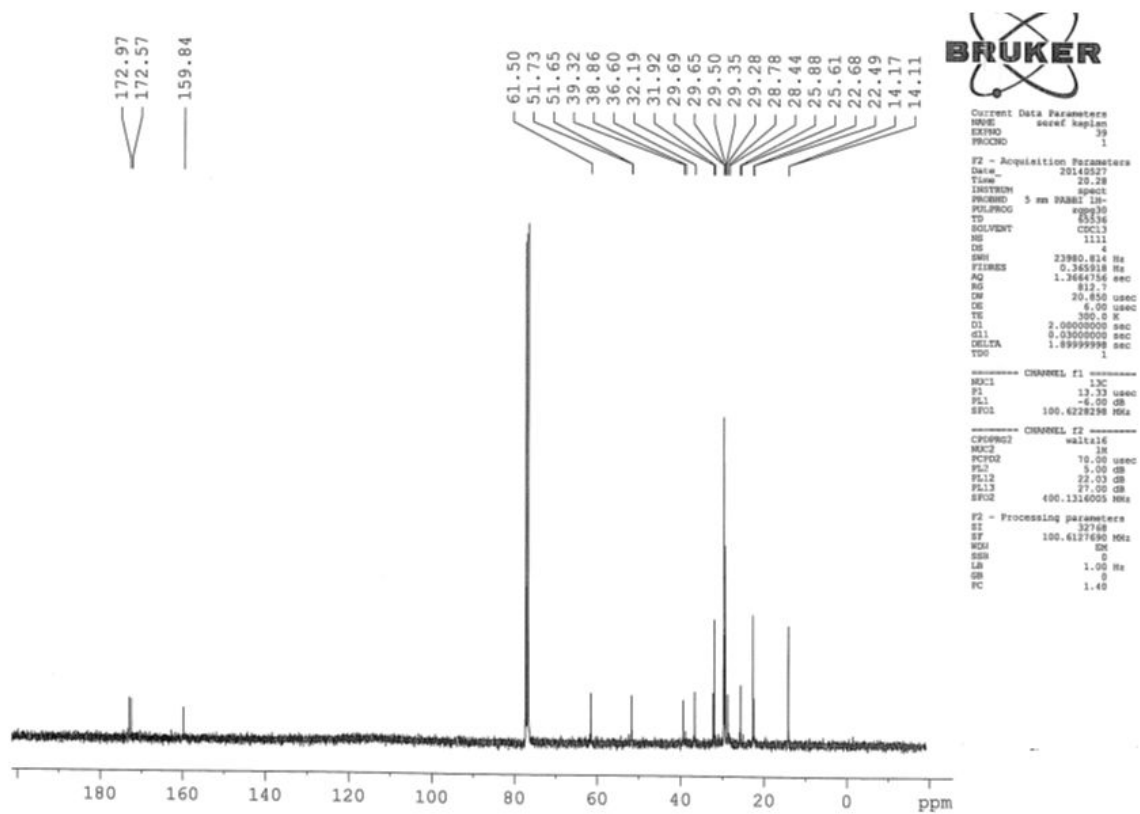

Figure S18.  $^{13}\text{C}$  NMR spectrum of  $\text{N}^2\text{P}/\text{N}^6\text{Lys}$ .

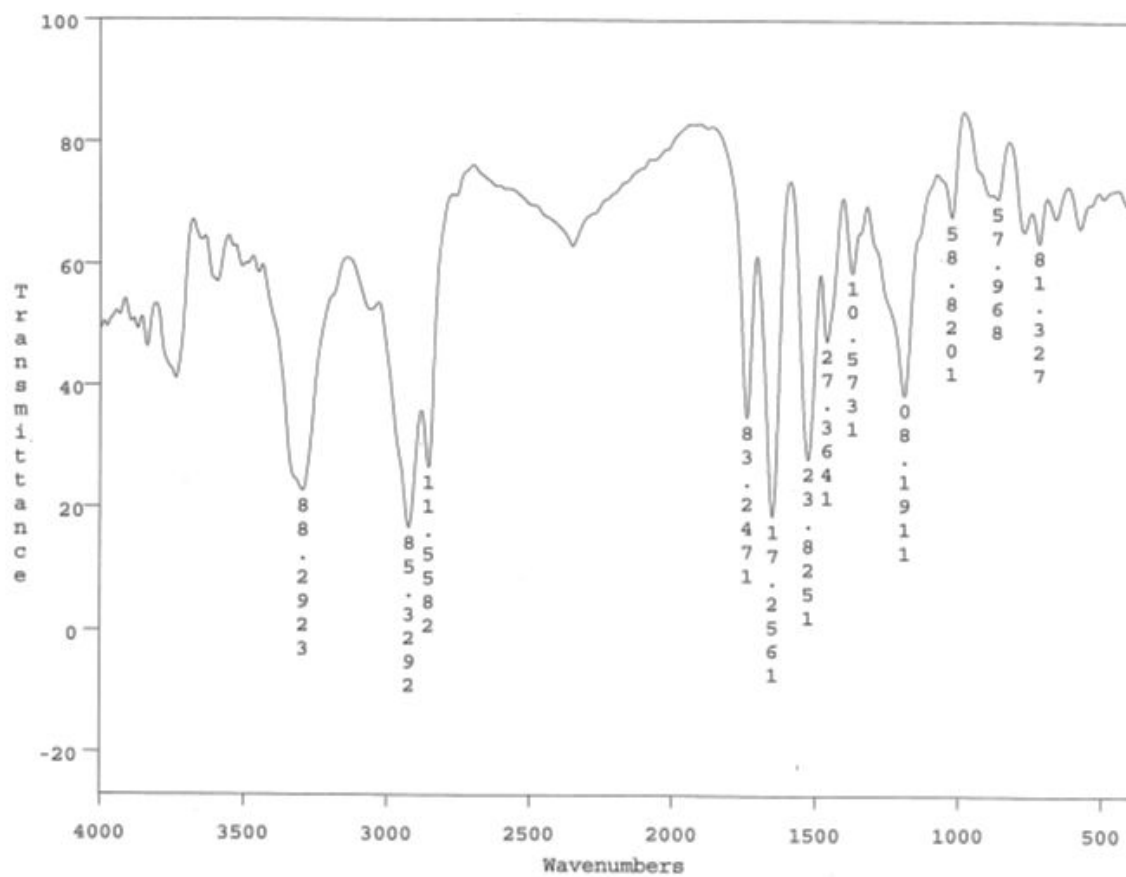

Figure S19. IR spectrum of N<sup>2</sup>P/N<sup>6</sup>Lys.

## 2. The effect of gelator concentration on gel-sol transition temperature in the solvents studied

**Table S1.** The effect of gelator concentration on gel-sol transition temperature ( $T_g$ ) in 1,2-propandiol.

| N <sup>2</sup> L/N <sup>6</sup> Lys |                     | N <sup>2</sup> M/N <sup>6</sup> Lys |                     | N <sup>2</sup> P/N <sup>6</sup> Lys |                     | C <sub>g</sub> * |
|-------------------------------------|---------------------|-------------------------------------|---------------------|-------------------------------------|---------------------|------------------|
| Mol/L                               | T <sub>g</sub> (°C) | mol L <sup>-1</sup>                 | T <sub>g</sub> (°C) | mol L <sup>-1</sup>                 | T <sub>g</sub> (°C) | (% W)            |
| 0,0052                              | 58                  | 0,0049                              | 60                  | 0,0045                              | 61                  | 0,386            |
| 0,0078                              | 62                  | 0,0073                              | 63                  | 0,0068                              | 65                  | 0,579            |
| 0,0104                              | 65                  | 0,0097                              | 67                  | 0,0091                              | 67                  | 0,772            |
| 0,0130                              | 67                  | 0,0121                              | 68                  | 0,0114                              | 72                  | 0,965            |
| 0,0156                              | 68                  | 0,0146                              | 69                  | 0,0136                              | 75                  | 1,158            |

\*Gelators concentration C<sub>g</sub> also was given % weight of gelators .

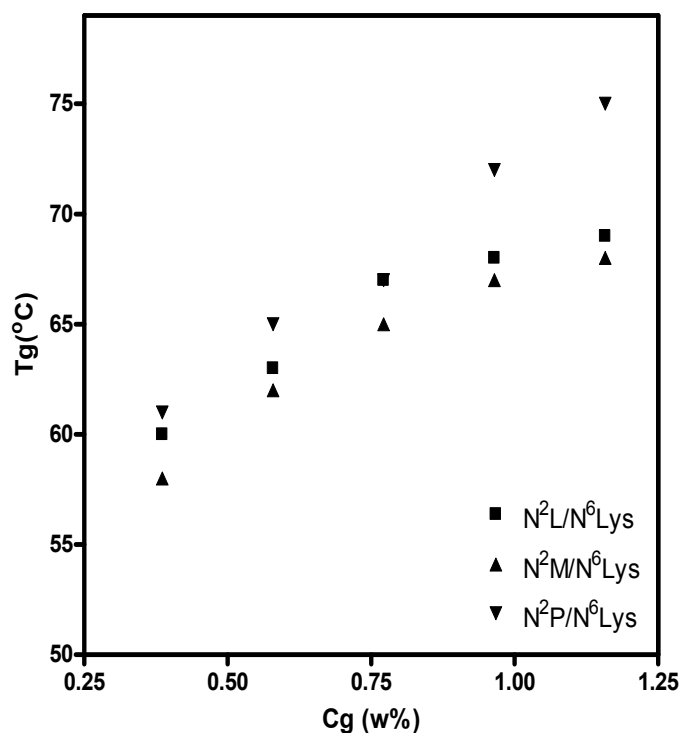

**Figure S20.** Plot of  $T_g$  versus C<sub>g</sub> (% w weight of gelators in 1,2-Propandiol gel) .

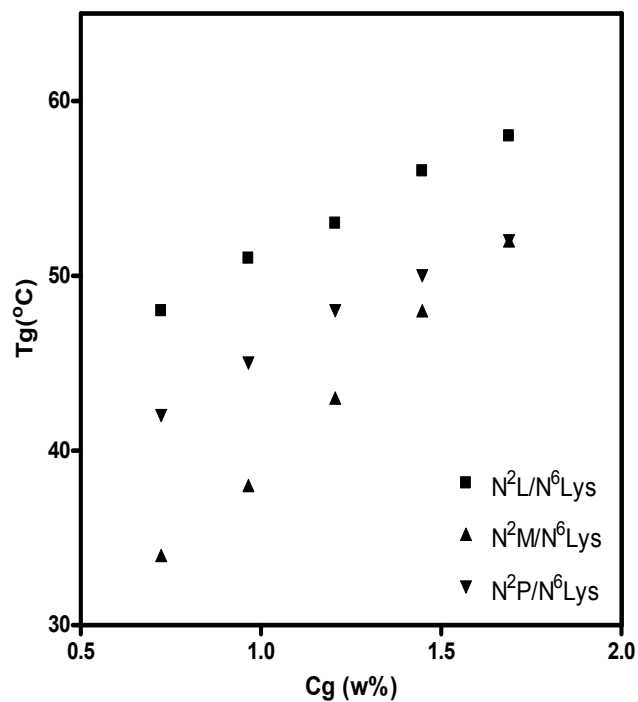

**Figure S21.** Plot of  $T_g$  versus the weight of gelators  $C_g$  (% w) in 1-decanol.

**Table S2.** The effect of gelator concentration on gel-sol transition temperature ( $T_g$ ) in 1-decanol.

| N <sup>2</sup> L/N <sup>6</sup> Lys |                     | N <sup>2</sup> M/N <sup>6</sup> Lys |                     | N <sup>2</sup> P/N <sup>6</sup> Lys |                     | C <sub>g</sub> *<br>(% W) |
|-------------------------------------|---------------------|-------------------------------------|---------------------|-------------------------------------|---------------------|---------------------------|
| Mol/L                               | T <sub>g</sub> (°C) | Mol/L                               | T <sub>g</sub> (°C) | Mol/L                               | T <sub>g</sub> (°C) |                           |
| 0,0078                              | 34                  | 0,0073                              | 48                  | 0,0045                              | 42                  | 0,723                     |
| 0,0104                              | 38                  | 0,0097                              | 51                  | 0,0068                              | 45                  | 0,965                     |
| 0,0130                              | 43                  | 0,0121                              | 53                  | 0,0091                              | 48                  | 1,206                     |
| 0,0156                              | 48                  | 0,0146                              | 56                  | 0,0114                              | 50                  | 1,447                     |
| 0,0182                              | 52                  | 0,0170                              | 58                  | 0,0136                              | 52                  | 1,688                     |

\*Gelators concentration also was given % weight of gelators .



**Table S3.** The effect of gelator concentration on gel-sol transition temperature ( $T_g$ ) in in liquid paraffin.

| N <sup>2</sup> L/N <sup>6</sup> Lys |        |               | N <sup>2</sup> M/N <sup>6</sup> Lys |        |               | N <sup>2</sup> P/N <sup>6</sup> Lys |        |               |
|-------------------------------------|--------|---------------|-------------------------------------|--------|---------------|-------------------------------------|--------|---------------|
| $C_g^*$<br>% w/w                    | Mol/L  | $T_g$<br>(°C) | $C_g^*$                             | Mol/L  | $T_g$<br>(°C) | $C_g^*$<br>% w/w                    | Mol/L  | $T_g$<br>(°C) |
| 0,697                               | 0,0104 | <b>139</b>    | 0,930                               | 0,0073 | 124           | 0,465                               | 0,0045 | 100           |
| 0,930                               | 0,0130 | <b>143</b>    | 1,162                               | 0,0097 | 126           | 0,697                               | 0,0068 | 110           |
| 1,162                               | 0,0156 | <b>148</b>    | 1,395                               | 0,0121 | 129           | 0,930                               | 0,0091 | 112           |
| 1,395                               | 0,0182 | <b>154</b>    | 1,627                               | 0,0146 | 131           | 1,162                               | 0,0114 | 114           |
| 1,627                               | 0,0208 | <b>160</b>    | 1,860                               | 0,0194 | 134           | 1,395                               | 0,0182 | 115           |

\*Gelators concentration  $C_g$  (as a molL<sup>-1</sup>) and also was given % weight of gelators .

**Table S4.** The effect of gelator concentration on gel-sol transition temperature ( $T_g$ ) in LIE.

| N <sup>2</sup> L/N <sup>6</sup> Lys |            | N <sup>2</sup> M/N <sup>6</sup> Lys |            | N <sup>2</sup> P/N <sup>6</sup> Lys |            | $C_g^*$ |
|-------------------------------------|------------|-------------------------------------|------------|-------------------------------------|------------|---------|
| Mol/L                               | $T_g$ (°C) | Mol/L                               | $T_g$ (°C) | Mol/L                               | $T_g$ (°C) | (% W)   |
| 0,0052                              | 69         | 0,0049                              | 60         | 0,0045                              | 54         | 0,468   |
| 0,0078                              | 76         | 0,0073                              | 61         | 0,0068                              | 60         | 0,702   |
| 0,0104                              | 77         | 0,0097                              | 65         | 0,0091                              | 64         | 0,936   |
| 0,0130                              | 80         | 0,0121                              | 68         | 0,0114                              | 70         | 1,170   |
| 0,0156                              | 86         | 0,0146                              | 70         | 0,0136                              | 72         | 1,405   |

\*Gelators concentration  $C_g$  (as a molL<sup>-1</sup>) and also was given % weight of gelators in gel.

**Table S5.** The effect of gelator concentration on gel-sol transition temperature ( $T_g$ ) in LEE.

| <b>N<sup>2</sup>L/N<sup>6</sup>Lys</b> |            | <b>N<sup>2</sup>M/N<sup>6</sup>Lys</b> |            | <b>N<sup>2</sup>P/N<sup>6</sup>Lys</b> |            | <b>C<sub>g</sub><sup>*</sup></b> |
|----------------------------------------|------------|----------------------------------------|------------|----------------------------------------|------------|----------------------------------|
| Mol/L                                  | $T_g$ (°C) | Mol/L                                  | $T_g$ (°C) | Mol/L                                  | $T_g$ (°C) | <b>(% W)</b>                     |
| 0,0052                                 | 73         | 0,0049                                 | 84         | 0,0045                                 | 55         | 0,464                            |
| 0,0078                                 | 75         | 0,0073                                 | 86         | 0,0068                                 | 63         | 0,696                            |
| 0,0104                                 | 76         | 0,0097                                 | 89         | 0,0091                                 | 71         | 0,928                            |
| 0,0130                                 | 78         | 0,0121                                 | 92         | 0,0114                                 | 75         | 1,160                            |
| 0,0156                                 | 79         | 0,0146                                 | 95         | 0,0136                                 | 76         | 1,392                            |

\*Gelators concentration  $C_g$  (as a molL<sup>-1</sup>) and also was given % weight of gelators in gel.

**Table S6.** The effect of gelator concentration on gel-sol transition temperature ( $T_g$ ) in MIE.

| <b>N<sup>2</sup>L/N<sup>6</sup>Lys</b> |        |       | <b>N<sup>2</sup>M/N<sup>6</sup>Lys</b> |        |       | <b>N<sup>2</sup>P/N<sup>6</sup>Lys</b> |        |       |
|----------------------------------------|--------|-------|----------------------------------------|--------|-------|----------------------------------------|--------|-------|
| $C_g^*$                                | Mol/L  | $T_g$ | $C_g^*$                                | Mol/L  | $T_g$ | $C_g^*$                                | Mol/L  | $T_g$ |
| % w/w                                  |        | (°C)  |                                        |        | (°C)  | % w/w                                  |        | (°C)  |
| 0,705                                  | 0,0078 | 65    | 0,470                                  | 0,0049 | 96    | 0,470                                  | 0,0045 | 55    |
| 0,941                                  | 0,0104 | 70    | 0,705                                  | 0,0073 | 98    | 0,705                                  | 0,0068 | 65    |
| 1,176                                  | 0,0130 | 75    | 0,941                                  | 0,0097 | 100   | 0,941                                  | 0,0091 | 69    |
| 1,411                                  | 0,0156 | 80    | 1,176                                  | 0,0121 | 102   | 1,176                                  | 0,0114 | 72    |
| 1,647                                  | 0,0182 | 84    | 1,411                                  | 0,0146 | 104   | 1,411                                  | 0,0136 | 76    |

\* Gelators concentration  $C_g$  (as a molL<sup>-1</sup>) and also was given % weight of gelators in gel.

**Table S7.** The effect of gelator concentration on gel-sol transition temperature ( $T_g$ ) in MEE.

| <b>N<sup>2</sup>L/N<sup>6</sup>Lys</b> |        |               | <b>N<sup>2</sup>M/N<sup>6</sup>Lys</b> |        |               | <b>N<sup>2</sup>P/N<sup>6</sup>Lys</b> |        |               |
|----------------------------------------|--------|---------------|----------------------------------------|--------|---------------|----------------------------------------|--------|---------------|
| $C_g^*$<br>% w/w                       | Mol/L  | $T_g$<br>(°C) | $C_g^*$<br>% w/w                       | Mol/L  | $T_g$<br>(°C) | $C_g^*$<br>% w/w                       | Mol/L  | $T_g$<br>(°C) |
| 0,696                                  | 0,0078 | 76            | 0,464                                  | 0,0049 | 80            | 0,464                                  | 0,0045 | 50            |
| 0,929                                  | 0,0104 | 82            | 0,696                                  | 0,0073 | 85            | 0,696                                  | 0,0068 | 57            |
| 1,161                                  | 0,0130 | 87            | 0,929                                  | 0,0097 | 91            | 0,929                                  | 0,0091 | 71            |
| 1,393                                  | 0,0156 | 92            | 1,161                                  | 0,0121 | 95            | 1,161                                  | 0,0114 | 75            |
| 1,626                                  | 0,0182 | 96            | 1,393                                  | 0,0146 | 100           | 1,393                                  | 0,0136 | 77            |

\*Gelators concentration  $C_g$  (as a molL<sup>-1</sup>) and also was given % weight of gelators in gel.

### 3. van't Hoff plots for the gels prepared in the solvents studied

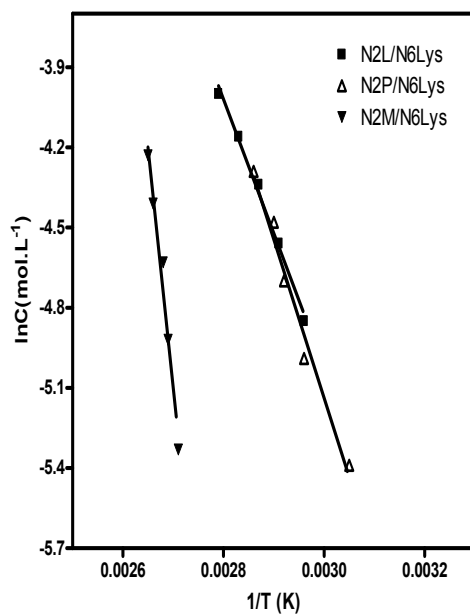

**Figure S22.** van't Hoff plots for N<sup>2</sup>L/N<sup>6</sup>Lys, N<sup>2</sup>M/N<sup>6</sup>Lys and N<sup>2</sup>P/N<sup>6</sup>Lys gels prepared in MIE.

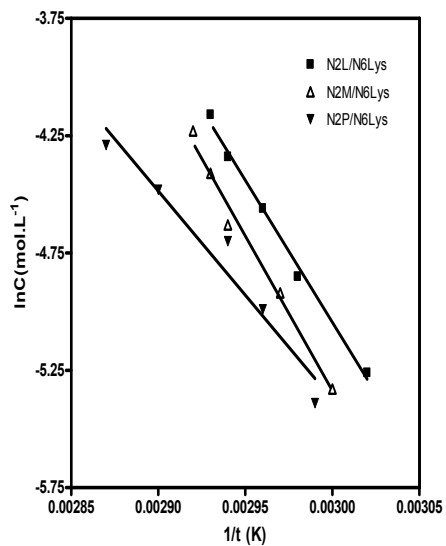

**Figure S23.** van't Hoff plots for N<sup>2</sup>L/N<sup>6</sup>Lys, N<sup>2</sup>M/N<sup>6</sup>Lys and N<sup>2</sup>P/N<sup>6</sup>Lys gels prepared in 1,2-propanediol.

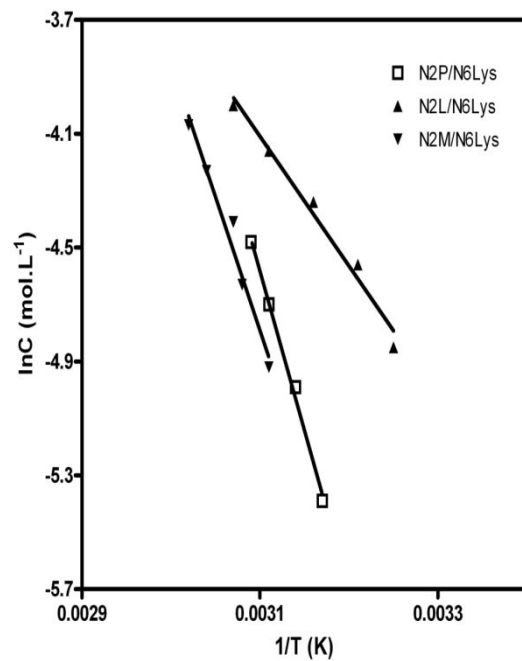

**Figure S24.** van't Hoff plots for N<sup>2</sup>L/N<sup>6</sup>Lys, N<sup>2</sup>M/N<sup>6</sup>Lys and N<sup>2</sup>P/N<sup>6</sup>Lys gels prepared in 1-decanol.

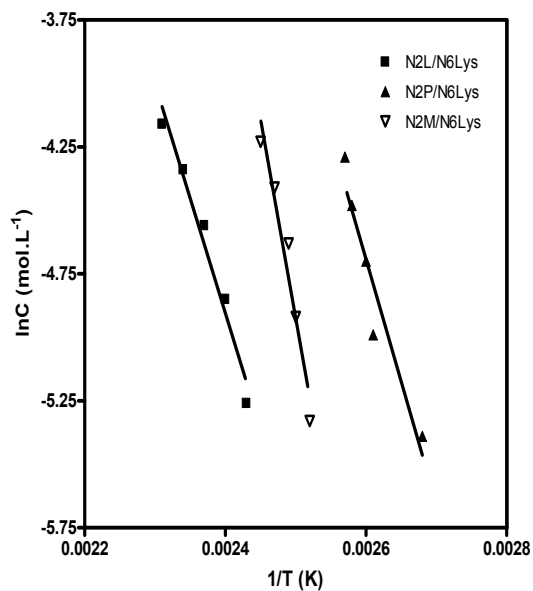

**Figure S25.** van't Hoff plots for N<sup>2</sup>L/N<sup>6</sup>Lys, N<sup>2</sup>M/N<sup>6</sup>Lys and N<sup>2</sup>P/N<sup>6</sup>Lys gels prepared in liquid paraffin.

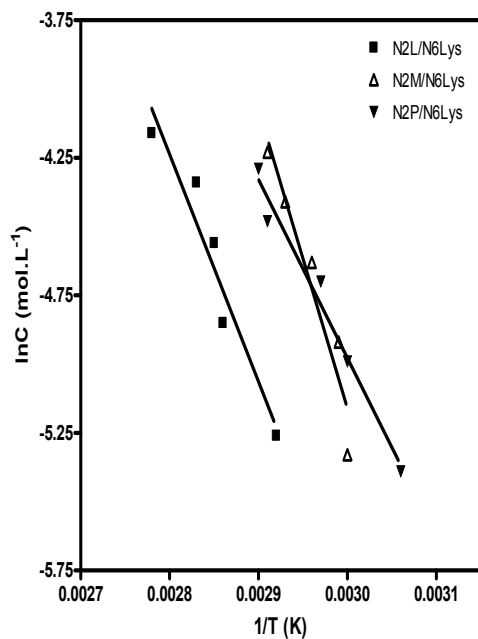

**Figure S26.** van't Hoff plots for N<sup>2</sup>L/N<sup>6</sup>Lys, N<sup>2</sup>M/N<sup>6</sup>Lys and N<sup>2</sup>P/N<sup>6</sup>Lys gels prepared in LIE.

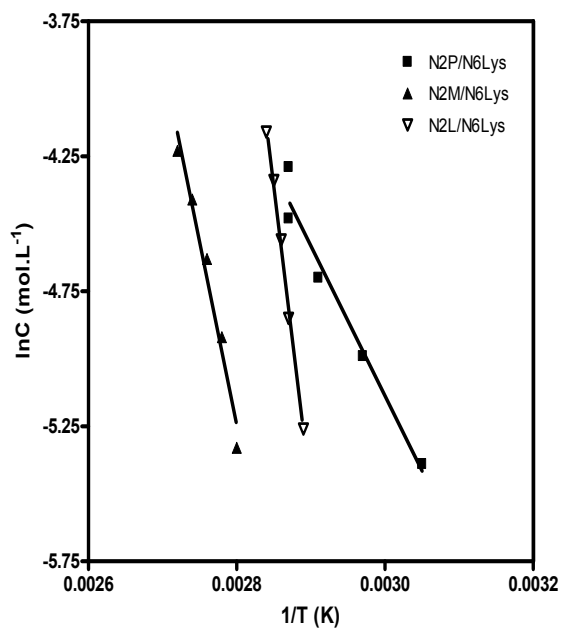

**Figure S27.** van't Hoff plots for N<sup>2</sup>L/N<sup>6</sup>Lys, N<sup>2</sup>M/N<sup>6</sup>Lys and N<sup>2</sup>P/N<sup>6</sup>Lys gels prepared in LEE.

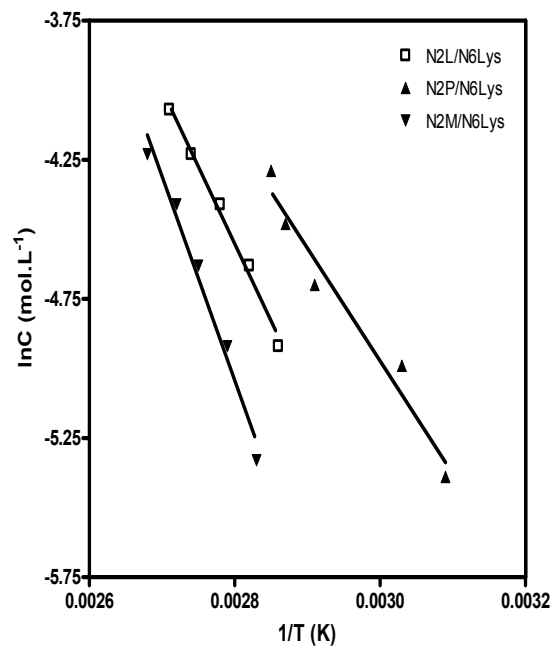

**Figure S28.** van't Hoff plots for N<sup>2</sup>L/N<sup>6</sup>Lys, N<sup>2</sup>M/N<sup>6</sup>Lys and N<sup>2</sup>P/N<sup>6</sup>Lys gels prepared in MEE.

**4. The time-dependent release rate of Npx from the gels in the solvent studied at pH 7.4 (0.1 M phosphate buffer) and 25 °C**

**Table S8.** The time-dependent release rate of Npx (3 mg) from N<sup>2</sup>P/N<sup>6</sup>Lys (6 mg gelator in 1 mL different solvents) gels at pH 7.4 (0.1 M phosphate buffer) and 25 °C.

| solvents<br>Elapsed Time (hour) | LEE Release% | 1,2-PROPANDIOL Release% | 1-DECANOL Release% | LIQUID PARAFFIN Release% |
|---------------------------------|--------------|-------------------------|--------------------|--------------------------|
| 1. hour                         | 3,297755     | 5,488487                | 6,585148           | 2,998116                 |
| 2. hour                         | 11,88582     | 6,911556                | 8,236185           | 4,207034                 |
| 3. hour                         | 15,04067     | 9,415743                | 9,981776           | 4,73205                  |
| 4. hour                         | 17,80434     | 12,40997                | 11,50156           | 5,198347                 |
| 5. hour                         | 20,21656     | 16,20425                | 12,68112           | 5,686232                 |
| 6. hour                         | 22,31187     | 18,8276                 | 14,01222           | 6,193545                 |
| 7. hour                         | 24,459       | 21,13836                | 15,52294           | 6,497934                 |
| 8. hour                         | 26,84618     | 23,35802                | 16,46978           | 6,833408                 |
| 9. hour                         | 28,54255     | 25,18003                | 17,10792           | 7,167588                 |
| 24. hour                        | 38,44963     | 30,56058                | 26,0116            | 10,27494                 |

**Table S9.** The effect of pH on the time-dependent release of Npx (3mg) from N<sup>2</sup>P/N<sup>6</sup>Lys (6 mg) gel prepared in LEE at 25 °C.

| pH<br>Elapsed Time (hour) | 5,0 Release% | 7,0 Release% | 7,4 Release% |
|---------------------------|--------------|--------------|--------------|
| 1. hour                   | 2,158782     | 2,821096     | 3,297755     |
| 2. hour                   | 2,835776     | 7,902437     | 11,88582     |
| 3. hour                   | 3,435917     | 11,51106     | 15,04067     |
| 4. hour                   | 3,983384     | 14,21213     | 17,80434     |
| 5. hour                   | 4,41255      | 16,64594     | 20,21656     |
| 6. hour                   | 4,828763     | 19,49337     | 22,31187     |
| 7. hour                   | 5,108973     | 22,46774     | 24,459       |
| 8. hour                   | 5,337804     | 23,50784     | 26,84618     |
| 9. hour                   | 5,650828     | 25,51335     | 28,54255     |
| 24. hour                  | 6,586875     | 36,88495     | 38,44963     |



**Table S10.** Effect of Npx concentrations on the time-dependence release rate of Npx from  $N^2M/N^6Lys$  gel in liquid paraffin at pH 7.4 (0.1 M phosphate buffer) and 25 °C.

| Naproxen<br>Elapsed<br>Time (hour) | 0,5 mg Npx<br>Release% | 1 mg Npx<br>Release% | 1,5 mg Npx<br>Release% | 3 mg Npx<br>Release% | 5 mg Npx<br>Release% |
|------------------------------------|------------------------|----------------------|------------------------|----------------------|----------------------|
| 1. hour                            | 0,680448               | 0,94641              | 2,024937               | 6,387404             | 4,542941             |
| 2. hour                            | 0,999948               | 1,247776             | 2,331053               | 7,64252              | 6,973297             |
| 3. hour                            | 1,113068               | 1,570298             | 2,626806               | 8,191714             | 7,631726             |
| 4. hour                            | 1,198124               | 2,083225             | 2,758923               | 8,411046             | 8,150265             |
| 5. hour                            | 1,323765               | 2,268448             | 2,991208               | 8,634696             | 9,186912             |
| 6. hour                            | 1,367372               | 2,49253              | 3,191543               | 8,762928             | 9,94335              |
| 7. hour                            | 1,395005               | 2,529661             | 3,346544               | 9,041411             | 10,14973             |
| 8. hour                            | 1,408821               | 2,618603             | 3,374608               | 9,152804             | 10,55126             |
| 9. hour                            | 1,404072               | 2,773603             | 3,320207               | 9,295283             | 10,99165             |
| 24. hour                           | 2,284423               | 3,854289             | 4,90648                | 11,53049             | 13,29551             |

**Table S11.** Release profiles of 3 mg Npx from the gels of  $N^2L/N^6Lys$ ,  $N^2M/N^6Lys$  and  $N^2P/N^6Lys$  in liquid paraffin as a function of time at two different concentrations at pH 7.4 (0.1 M phosphate buffer) and 25 °C.

| Gelator<br>Elapsed<br>Time (hour) | 4 mg<br>$N^2L/N^6Lys$<br>Release% | 6 mg<br>$N^2L/N^6Lys$<br>Release% | 4 mg<br>$N^2M/N^6Lys$<br>Release% | 6 mg<br>$N^2M/N^6Lys$<br>Release% | 4 mg<br>$N^2P/N^6Lys$<br>Release% | 6 mg<br>$N^2P/N^6Lys$<br>Release% |
|-----------------------------------|-----------------------------------|-----------------------------------|-----------------------------------|-----------------------------------|-----------------------------------|-----------------------------------|
| 1. hour                           | 6,553198                          | 2,355662                          | 6,387404                          | 1,436021                          | 2,998116                          | 2,125968                          |
| 2. hour                           | 7,741824                          | 5,1413550                         | 7,64252                           | 3,328410                          | 4,207034                          | 3,823634                          |
| 3. hour                           | 8,866549                          | 6,1922501                         | 8,191714                          | 3,942799                          | 4,73205                           | 4,241143                          |
| 4. hour                           | 9,703293                          | 6,3882675                         | 8,411046                          | 4,286909                          | 5,198347                          | 4,558052                          |
| 5. hour                           | 10,05345                          | 7,0164730                         | 8,634696                          | 4,868053                          | 5,686232                          | 4,83696                           |
| 6. hour                           | 10,28055                          | 7,3951234                         | 8,762928                          | 5,160784                          | 6,193545                          | 5,048095                          |
| 7. hour                           | 10,7054                           | 7,6671299                         | 9,041411                          | 5,340826                          | 6,497934                          | 5,356369                          |
| 8. hour                           | 11,135                            | 7,9520891                         | 9,152804                          | 5,412066                          | 6,833408                          | 5,528208                          |
| 9. hour                           | 11,43809                          | 8,0902512                         | 9,295283                          | 5,539866                          | 7,167588                          | 5,689253                          |
| 24. hour                          | 17,53104                          | 9,8932659                         | 11,53049                          | 6,396039                          | 10,27494                          | 7,467226                          |

## 5. 3D STRUCTURE OF OCTAMER IN MOL2 FORMAT OBTAINED FROM AM1 CALCULATION.

@<TRIPOS>MOLECULE

Molecule Name

1200 1176

SMALL

NO\_CHARGES

@<TRIPOS>ATOM

|    |     |         |          |         |   |
|----|-----|---------|----------|---------|---|
| 1  | C1  | 14.4628 | -12.0594 | -1.1817 | C |
| 2  | O2  | 13.9488 | -11.2792 | -2.0112 | O |
| 3  | C3  | 13.5879 | -12.9216 | -0.2414 | C |
| 4  | O4  | 14.1043 | -13.4618 | 0.7582  | O |
| 5  | N5  | 15.8188 | -12.2276 | -1.0558 | N |
| 6  | H6  | 16.1431 | -12.7745 | -0.2870 | H |
| 7  | C7  | 16.7764 | -11.3848 | -1.7169 | C |
| 8  | H8  | 16.3035 | -10.9657 | -2.6511 | H |
| 9  | H9  | 17.6458 | -12.0365 | -2.0215 | H |
| 10 | C10 | 17.3012 | -10.2257 | -0.8650 | C |
| 11 | H11 | 17.6139 | -10.5930 | 0.1478  | H |
| 12 | H12 | 16.4825 | -9.4748  | -0.7095 | H |
| 13 | C13 | 18.4820 | -9.5682  | -1.5468 | C |
| 14 | H14 | 18.2268 | -9.3288  | -2.6152 | H |
| 15 | H15 | 19.3495 | -10.2799 | -1.5697 | H |
| 16 | C16 | 18.8722 | -8.2985  | -0.8205 | C |
| 17 | H17 | 19.0901 | -8.5303  | 0.2550  | H |
| 18 | H18 | 18.0236 | -7.5629  | -0.8442 | H |
| 19 | C19 | 20.1214 | -7.6609  | -1.4555 | C |
| 20 | H20 | 20.9314 | -8.4532  | -1.5125 | H |
| 21 | C21 | 19.7665 | -7.2741  | -2.8946 | C |
| 22 | O22 | 19.1015 | -6.3193  | -3.2982 | O |
| 23 | O23 | 20.2892 | -8.1511  | -3.7979 | O |
| 24 | C24 | 19.9604 | -7.9708  | -5.1851 | C |
| 25 | H25 | 20.7765 | -8.5402  | -5.7067 | H |
| 26 | H26 | 20.0137 | -6.8826  | -5.4493 | H |
| 27 | C27 | 18.5983 | -8.5424  | -5.4912 | C |
| 28 | H28 | 18.4290 | -8.5312  | -6.5943 | H |
| 29 | H29 | 18.5202 | -9.5932  | -5.1223 | H |
| 30 | H30 | 17.8009 | -7.9315  | -4.9997 | H |
| 31 | N31 | 20.6657 | -6.5533  | -0.7161 | N |
| 32 | H32 | 21.6556 | -6.5053  | -0.6588 | H |
| 33 | C33 | 19.9295 | -5.4745  | -0.2569 | C |
| 34 | O34 | 18.6975 | -5.3975  | -0.4345 | O |
| 35 | C35 | 20.6658 | -4.4017  | 0.5242  | C |
| 36 | H36 | 19.8938 | -3.6545  | 0.8572  | H |
| 37 | H37 | 21.1163 | -4.8587  | 1.4444  | H |
| 38 | C38 | 21.7325 | -3.7025  | -0.2906 | C |
| 39 | H39 | 22.5989 | -4.3915  | -0.4707 | H |
| 40 | H40 | 21.3193 | -3.4140  | -1.2930 | H |
| 41 | C41 | 22.2125 | -2.4619  | 0.4352  | C |
| 42 | H42 | 21.3474 | -1.7597  | 0.5816  | H |
| 43 | H43 | 22.5867 | -2.7445  | 1.4546  | H |
| 44 | C44 | 23.3100 | -1.7514  | -0.3279 | C |
| 45 | H45 | 24.1971 | -2.4289  | -0.4369 | H |
| 46 | H46 | 22.9522 | -1.5036  | -1.3619 | H |

|     |      |         |          |         |   |
|-----|------|---------|----------|---------|---|
| 47  | C47  | 23.7210 | -0.4812  | 0.3868  | C |
| 48  | H48  | 22.8263 | 0.1881   | 0.5039  | H |
| 49  | H49  | 24.0832 | -0.7322  | 1.4188  | H |
| 50  | C50  | 24.8064 | 0.2604   | -0.3636 | C |
| 51  | H51  | 25.7127 | -0.3929  | -0.4630 | H |
| 52  | H52  | 24.4531 | 0.4971   | -1.4017 | H |
| 53  | C53  | 25.1771 | 1.5420   | 0.3525  | C |
| 54  | H54  | 24.2615 | 2.1809   | 0.4767  | H |
| 55  | H55  | 25.5533 | 1.3011   | 1.3818  | H |
| 56  | C56  | 26.2326 | 2.3199   | -0.4035 | C |
| 57  | H57  | 25.8613 | 2.5528   | -1.4363 | H |
| 58  | H58  | 27.1557 | 1.6929   | -0.5174 | H |
| 59  | C59  | 26.5765 | 3.6071   | 0.3155  | C |
| 60  | H60  | 25.6454 | 4.2190   | 0.4579  | H |
| 61  | H61  | 26.9755 | 3.3712   | 1.3372  | H |
| 62  | C62  | 27.5978 | 4.4172   | -0.4534 | C |
| 63  | H63  | 28.5336 | 3.8137   | -0.5897 | H |
| 64  | H64  | 27.2014 | 4.6482   | -1.4773 | H |
| 65  | C65  | 27.9251 | 5.7075   | 0.2675  | C |
| 66  | H66  | 26.9839 | 6.2990   | 0.4274  | H |
| 67  | H67  | 28.3446 | 5.4751   | 1.2818  | H |
| 68  | C68  | 28.9182 | 6.5402   | -0.5139 | C |
| 69  | H69  | 29.8623 | 5.9545   | -0.6687 | H |
| 70  | H70  | 28.5008 | 6.7687   | -1.5300 | H |
| 71  | C71  | 29.2359 | 7.8340   | 0.2056  | C |
| 72  | H72  | 29.6663 | 7.6032   | 1.2159  | H |
| 73  | H73  | 28.2867 | 8.4092   | 0.3758  | H |
| 74  | C74  | 30.2071 | 8.6788   | -0.5775 | C |
| 75  | H75  | 29.7841 | 8.9421   | -1.5772 | H |
| 76  | H76  | 30.4291 | 9.6254   | -0.0282 | H |
| 77  | H77  | 31.1668 | 8.1304   | -0.7376 | H |
| 78  | N78  | 12.2805 | -13.0811 | -0.6144 | N |
| 79  | H79  | 11.9303 | -12.4820 | -1.3366 | H |
| 80  | C80  | 11.2931 | -13.6139 | 0.2943  | C |
| 81  | H81  | 11.7854 | -14.3821 | 0.9553  | H |
| 82  | H82  | 10.5145 | -14.1264 | -0.3404 | H |
| 83  | C83  | 10.6107 | -12.5577 | 1.1647  | C |
| 84  | H84  | 10.3371 | -11.6647 | 0.5394  | H |
| 85  | H85  | 11.3218 | -12.2121 | 1.9599  | H |
| 86  | C86  | 9.3554  | -13.1137 | 1.8018  | C |
| 87  | H87  | 9.5569  | -14.1190 | 2.2599  | H |
| 88  | H88  | 8.5703  | -13.2658 | 1.0139  | H |
| 89  | C89  | 8.8533  | -12.1612 | 2.8656  | C |
| 90  | H90  | 8.8482  | -11.1139 | 2.4620  | H |
| 91  | H91  | 9.5467  | -12.1694 | 3.7492  | H |
| 92  | C92  | 7.4295  | -12.5159 | 3.3253  | C |
| 93  | H93  | 6.7857  | -12.7096 | 2.4079  | H |
| 94  | C94  | 7.4915  | -13.8441 | 4.0865  | C |
| 95  | O95  | 7.6014  | -14.0677 | 5.2902  | O |
| 96  | O96  | 7.3895  | -14.9137 | 3.2324  | O |
| 97  | C97  | 7.4654  | -16.2292 | 3.7929  | C |
| 98  | H98  | 6.9656  | -16.8641 | 3.0119  | H |
| 99  | H99  | 6.8872  | -16.2708 | 4.7529  | H |
| 100 | C100 | 8.9023  | -16.6389 | 4.0071  | C |
| 101 | H101 | 8.9454  | -17.7057 | 4.3306  | H |
| 102 | H102 | 9.4890  | -16.5199 | 3.0648  | H |
| 103 | H103 | 9.3673  | -15.9996 | 4.7969  | H |

|     |      |         |          |         |   |
|-----|------|---------|----------|---------|---|
| 104 | N104 | 6.7693  | -11.4861 | 4.0761  | N |
| 105 | H105 | 5.7775  | -11.4241 | 3.9532  | H |
| 106 | C106 | 7.3801  | -10.6888 | 5.0253  | C |
| 107 | O107 | 8.6090  | -10.7351 | 5.2442  | O |
| 108 | C108 | 6.5057  | -9.6963  | 5.7730  | C |
| 109 | H109 | 6.9433  | -8.6788  | 5.5887  | H |
| 110 | H110 | 5.4494  | -9.6841  | 5.3919  | H |
| 111 | C111 | 6.5219  | -10.0044 | 7.2559  | C |
| 112 | H112 | 5.9933  | -10.9747 | 7.4471  | H |
| 113 | H113 | 7.5831  | -10.1281 | 7.6008  | H |
| 114 | C114 | 5.8523  | -8.8918  | 8.0331  | C |
| 115 | H115 | 6.4076  | -7.9312  | 7.8644  | H |
| 116 | H116 | 4.8077  | -8.7414  | 7.6485  | H |
| 117 | C117 | 5.8083  | -9.1959  | 9.5152  | C |
| 118 | H118 | 6.8443  | -9.4102  | 9.8883  | H |
| 119 | H119 | 5.1953  | -10.1183 | 9.6932  | H |
| 120 | C120 | 5.2197  | -8.0329  | 10.2843 | C |
| 121 | H121 | 5.8657  | -7.1262  | 10.1428 | H |
| 122 | H122 | 4.2065  | -7.7838  | 9.8682  | H |
| 123 | C123 | 5.0972  | -8.3408  | 11.7610 | C |
| 124 | H124 | 4.4106  | -9.2156  | 11.9080 | H |
| 125 | H125 | 6.0992  | -8.6343  | 12.1709 | H |
| 126 | C126 | 4.5677  | -7.1424  | 12.5190 | C |
| 127 | H127 | 5.2862  | -6.2867  | 12.4152 | H |
| 128 | H128 | 3.5945  | -6.8123  | 12.0654 | H |
| 129 | C129 | 4.3609  | -7.4549  | 13.9853 | C |
| 130 | H130 | 5.3228  | -7.8182  | 14.4338 | H |
| 131 | H131 | 3.6126  | -8.2839  | 14.0917 | H |
| 132 | C132 | 3.8784  | -6.2328  | 14.7371 | C |
| 133 | H133 | 4.6525  | -5.4232  | 14.6723 | H |
| 134 | H134 | 2.9461  | -5.8371  | 14.2514 | H |
| 135 | C135 | 3.5963  | -6.5496  | 16.1898 | C |
| 136 | H136 | 2.8002  | -7.3374  | 16.2553 | H |
| 137 | H137 | 4.5184  | -6.9710  | 16.6702 | H |
| 138 | C138 | 3.1516  | -5.3131  | 16.9414 | C |
| 139 | H139 | 3.9658  | -4.5417  | 16.9098 | H |
| 140 | H140 | 2.2546  | -4.8666  | 16.4338 | H |
| 141 | C141 | 2.8118  | -5.6338  | 18.3808 | C |
| 142 | H142 | 3.7012  | -6.0970  | 18.8838 | H |
| 143 | H143 | 1.9836  | -6.3900  | 18.4123 | H |
| 144 | C144 | 2.3925  | -4.3910  | 19.1371 | C |
| 145 | H145 | 3.2301  | -3.6443  | 19.1212 | H |
| 146 | H146 | 1.5175  | -3.9145  | 18.6184 | H |
| 147 | C147 | 2.0247  | -4.7087  | 20.5632 | C |
| 148 | H148 | 1.7190  | -3.7794  | 21.1018 | H |
| 149 | H149 | 1.1751  | -5.4329  | 20.5995 | H |
| 150 | H150 | 2.8920  | -5.1603  | 21.1030 | H |
| 151 | C151 | 10.3492 | -9.7013  | -3.5362 | C |
| 152 | O152 | 9.8090  | -8.7243  | -4.0999 | O |
| 153 | C153 | 9.5189  | -10.6570 | -2.6511 | C |
| 154 | O154 | 10.0970 | -11.4421 | -1.8665 | O |
| 155 | N155 | 11.6736 | -10.0185 | -3.6898 | N |
| 156 | H156 | 12.0609 | -10.7150 | -3.0826 | H |
| 157 | C157 | 12.6092 | -9.0948  | -4.2788 | C |
| 158 | H158 | 12.0678 | -8.4671  | -5.0425 | H |
| 159 | H159 | 13.3934 | -9.7086  | -4.8077 | H |
| 160 | C160 | 13.2965 | -8.1774  | -3.2662 | C |

|     |      |         |         |         |   |
|-----|------|---------|---------|---------|---|
| 161 | H161 | 13.7734 | -8.7961 | -2.4585 | H |
| 162 | H162 | 12.5324 | -7.5154 | -2.7800 | H |
| 163 | C163 | 14.3496 | -7.3293 | -3.9444 | C |
| 164 | H164 | 13.9391 | -6.8744 | -4.8851 | H |
| 165 | H165 | 15.2189 | -7.9718 | -4.2470 | H |
| 166 | C166 | 14.8125 | -6.2315 | -3.0120 | C |
| 167 | H167 | 15.0644 | -6.6725 | -2.0111 | H |
| 168 | H168 | 13.9896 | -5.4838 | -2.8535 | H |
| 169 | C169 | 16.0592 | -5.5143 | -3.5579 | C |
| 170 | H170 | 16.8452 | -6.2970 | -3.8068 | H |
| 171 | C171 | 15.6837 | -4.8359 | -4.8757 | C |
| 172 | O172 | 15.1486 | -3.7454 | -5.0776 | O |
| 173 | O173 | 15.9996 | -5.6152 | -5.9543 | O |
| 174 | C174 | 15.6763 | -5.1153 | -7.2604 | C |
| 175 | H175 | 14.6660 | -4.6273 | -7.2415 | H |
| 176 | H176 | 15.6459 | -6.0487 | -7.8844 | H |
| 177 | C177 | 16.7332 | -4.1550 | -7.7471 | C |
| 178 | H178 | 16.5065 | -3.8513 | -8.7967 | H |
| 179 | H179 | 16.7496 | -3.2438 | -7.1008 | H |
| 180 | H180 | 17.7423 | -4.6308 | -7.7166 | H |
| 181 | N181 | 16.6678 | -4.5958 | -2.6335 | N |
| 182 | H182 | 17.5941 | -4.8312 | -2.3386 | H |
| 183 | C183 | 15.9780 | -3.6208 | -1.9411 | C |
| 184 | O184 | 14.7786 | -3.3576 | -2.1769 | O |
| 185 | C185 | 16.7450 | -2.8418 | -0.8868 | C |
| 186 | H186 | 16.0002 | -2.4874 | -0.1256 | H |
| 187 | H187 | 17.4880 | -3.4996 | -0.3605 | H |
| 188 | C188 | 17.4441 | -1.6572 | -1.5174 | C |
| 189 | H189 | 18.1148 | -2.0052 | -2.3464 | H |
| 190 | H190 | 16.6781 | -0.9732 | -1.9726 | H |
| 191 | C191 | 18.2583 | -0.9029 | -0.4881 | C |
| 192 | H192 | 17.6186 | -0.6682 | 0.4035  | H |
| 193 | H193 | 19.1029 | -1.5497 | -0.1282 | H |
| 194 | C194 | 18.8074 | 0.3818  | -1.0687 | C |
| 195 | H195 | 19.3799 | 0.1590  | -2.0074 | H |
| 196 | H196 | 17.9547 | 1.0552  | -1.3540 | H |
| 197 | C197 | 19.7080 | 1.0920  | -0.0817 | C |
| 198 | H198 | 19.1704 | 1.2242  | 0.8943  | H |
| 199 | H199 | 20.6140 | 0.4610  | 0.1230  | H |
| 200 | C200 | 20.1344 | 2.4435  | -0.6120 | C |
| 201 | H201 | 20.6051 | 2.3211  | -1.6230 | H |
| 202 | H202 | 19.2285 | 3.0941  | -0.7462 | H |
| 203 | C203 | 21.1125 | 3.1208  | 0.3230  | C |
| 204 | H204 | 20.6783 | 3.1672  | 1.3565  | H |
| 205 | H205 | 22.0539 | 2.5121  | 0.3872  | H |
| 206 | C206 | 21.4383 | 4.5198  | -0.1531 | C |
| 207 | H207 | 20.5044 | 5.1439  | -0.1460 | H |
| 208 | H208 | 21.8016 | 4.4822  | -1.2140 | H |
| 209 | C209 | 22.4906 | 5.1697  | 0.7188  | C |
| 210 | H210 | 22.1648 | 5.1387  | 1.7919  | H |
| 211 | H211 | 23.4485 | 4.5883  | 0.6474  | H |
| 212 | C212 | 22.7305 | 6.6052  | 0.3033  | C |
| 213 | H213 | 22.9886 | 6.6437  | -0.7879 | H |
| 214 | H214 | 21.7858 | 7.1974  | 0.4399  | H |
| 215 | C215 | 23.8461 | 7.2344  | 1.1092  | C |
| 216 | H216 | 23.6245 | 7.1331  | 2.2044  | H |
| 217 | H217 | 24.8059 | 6.6852  | 0.9141  | H |

|     |      |         |          |         |   |
|-----|------|---------|----------|---------|---|
| 218 | C218 | 24.0139 | 8.6974   | 0.7594  | C |
| 219 | H219 | 24.1889 | 8.8039   | -0.3436 | H |
| 220 | H220 | 23.0662 | 9.2513   | 0.9981  | H |
| 221 | C221 | 25.1684 | 9.3182   | 1.5166  | C |
| 222 | H222 | 26.1229 | 8.7981   | 1.2340  | H |
| 223 | H223 | 25.0210 | 9.1616   | 2.6179  | H |
| 224 | C224 | 25.2870 | 10.7922  | 1.2267  | C |
| 225 | H225 | 24.3472 | 11.3257  | 1.5117  | H |
| 226 | H226 | 26.1339 | 11.2354  | 1.8038  | H |
| 227 | H227 | 25.4713 | 10.9667  | 0.1391  | H |
| 228 | N228 | 8.1650  | -10.6081 | -2.8062 | N |
| 229 | H229 | 7.7751  | -9.8755  | -3.3655 | H |
| 230 | C230 | 7.2575  | -11.3201 | -1.9416 | C |
| 231 | H231 | 7.8420  | -12.0472 | -1.3078 | H |
| 232 | H232 | 6.5601  | -11.9093 | -2.6055 | H |
| 233 | C233 | 6.4239  | -10.4132 | -1.0335 | C |
| 234 | H234 | 5.9865  | -9.5668  | -1.6300 | H |
| 235 | H235 | 7.0771  | -9.9664  | -0.2396 | H |
| 236 | C236 | 5.3062  | -11.2076 | -0.3942 | C |
| 237 | H237 | 5.7201  | -12.1326 | 0.0929  | H |
| 238 | H238 | 4.5870  | -11.5482 | -1.1863 | H |
| 239 | C239 | 4.5784  | -10.3773 | 0.6417  | C |
| 240 | H240 | 4.2999  | -9.3817  | 0.2079  | H |
| 241 | H241 | 5.2445  | -10.1932 | 1.5275  | H |
| 242 | C242 | 3.2953  | -11.0898 | 1.1048  | C |
| 243 | H243 | 2.6384  | -11.2765 | 0.1958  | H |
| 244 | C244 | 3.7073  | -12.4627 | 1.6468  | C |
| 245 | O245 | 4.3607  | -12.7454 | 2.6512  | O |
| 246 | O246 | 3.2733  | -13.4765 | 0.8388  | O |
| 247 | C247 | 3.5857  | -14.8230 | 1.2217  | C |
| 248 | H248 | 2.8353  | -15.4257 | 0.6423  | H |
| 249 | H249 | 3.4187  | -14.9513 | 2.3231  | H |
| 250 | C250 | 5.0007  | -15.1845 | 0.8425  | C |
| 251 | H251 | 5.1592  | -16.2794 | 0.9904  | H |
| 252 | H252 | 5.2000  | -14.9294 | -0.2254 | H |
| 253 | H253 | 5.7297  | -14.6295 | 1.4866  | H |
| 254 | N254 | 2.4922  | -10.3619 | 2.0439  | N |
| 255 | H255 | 1.5397  | -10.1997 | 1.7774  | H |
| 256 | C256 | 2.9508  | -9.8260  | 3.2320  | C |
| 257 | O257 | 4.1524  | -9.8976  | 3.5687  | O |
| 258 | C258 | 1.9041  | -9.1694  | 4.1132  | C |
| 259 | H259 | 1.2998  | -8.4410  | 3.5041  | H |
| 260 | H260 | 1.2032  | -9.9687  | 4.4754  | H |
| 261 | C261 | 2.5329  | -8.4629  | 5.2937  | C |
| 262 | H262 | 3.2315  | -9.1615  | 5.8275  | H |
| 263 | H263 | 3.1514  | -7.6013  | 4.9294  | H |
| 264 | C264 | 1.4628  | -7.9715  | 6.2446  | C |
| 265 | H265 | 0.7395  | -7.3152  | 5.6897  | H |
| 266 | H266 | 0.8795  | -8.8465  | 6.6367  | H |
| 267 | C267 | 2.0589  | -7.2022  | 7.4035  | C |
| 268 | H268 | 2.6061  | -6.3023  | 7.0174  | H |
| 269 | H269 | 2.8112  | -7.8427  | 7.9367  | H |
| 270 | C270 | 0.9823  | -6.7679  | 8.3747  | C |
| 271 | H271 | 0.2232  | -6.1391  | 7.8366  | H |
| 272 | H272 | 0.4438  | -7.6715  | 8.7657  | H |
| 273 | C273 | 1.5612  | -5.9842  | 9.5327  | C |
| 274 | H274 | 2.3283  | -6.6077  | 10.0655 | H |

|     |      |         |         |         |   |
|-----|------|---------|---------|---------|---|
| 275 | H275 | 2.0881  | -5.0726 | 9.1455  | H |
| 276 | C276 | 0.4777  | -5.5717 | 10.5056 | C |
| 277 | H277 | -0.2836 | -4.9403 | 9.9735  | H |
| 278 | H278 | -0.0562 | -6.4841 | 10.8819 | H |
| 279 | C279 | 1.0485  | -4.8010 | 11.6762 | C |
| 280 | H280 | 1.5880  | -3.8914 | 11.3020 | H |
| 281 | H281 | 1.8037  | -5.4352 | 12.2135 | H |
| 282 | C282 | -0.0425 | -4.3849 | 12.6393 | C |
| 283 | H283 | -0.7867 | -3.7352 | 12.1053 | H |
| 284 | H284 | -0.5951 | -5.2937 | 12.9966 | H |
| 285 | C285 | 0.5248  | -3.6381 | 13.8270 | C |
| 286 | H286 | 1.2559  | -4.2948 | 14.3708 | H |
| 287 | H287 | 1.0916  | -2.7378 | 13.4707 | H |
| 288 | C288 | -0.5718 | -3.2050 | 14.7761 | C |
| 289 | H289 | -1.2908 | -2.5313 | 14.2371 | H |
| 290 | H290 | -1.1528 | -4.1033 | 15.1145 | H |
| 291 | C291 | -0.0049 | -2.4852 | 15.9805 | C |
| 292 | H292 | 0.5883  | -1.5949 | 15.6430 | H |
| 293 | H293 | 0.7023  | -3.1656 | 16.5269 | H |
| 294 | C294 | -1.1026 | -2.0357 | 16.9212 | C |
| 295 | H295 | -1.8000 | -1.3424 | 16.3782 | H |
| 296 | H296 | -1.7070 | -2.9252 | 17.2419 | H |
| 297 | C297 | -0.5397 | -1.3425 | 18.1349 | C |
| 298 | H298 | 0.1404  | -2.0271 | 18.6987 | H |
| 299 | H299 | 0.0436  | -0.4377 | 17.8375 | H |
| 300 | H300 | -1.3638 | -1.0227 | 18.8172 | H |
| 301 | C301 | 6.2708  | -6.8141 | -5.2944 | C |
| 302 | O302 | 5.7192  | -5.7771 | -5.7250 | O |
| 303 | C303 | 5.4430  | -7.8990 | -4.5717 | C |
| 304 | O304 | 6.0110  | -8.7379 | -3.8376 | O |
| 305 | N305 | 7.5997  | -7.0868 | -5.4668 | N |
| 306 | H306 | 7.9945  | -7.8551 | -4.9599 | H |
| 307 | C307 | 8.5226  | -6.1060 | -5.9768 | C |
| 308 | H308 | 7.9562  | -5.3726 | -6.6189 | H |
| 309 | H309 | 9.2627  | -6.6555 | -6.6273 | H |
| 310 | C310 | 9.2895  | -5.3409 | -4.8966 | C |
| 311 | H311 | 9.7741  | -6.0659 | -4.1885 | H |
| 312 | H312 | 8.5785  | -4.7096 | -4.3021 | H |
| 313 | C313 | 10.3475 | -4.4655 | -5.5317 | C |
| 314 | H314 | 9.9048  | -3.8689 | -6.3755 | H |
| 315 | H315 | 11.1510 | -5.1106 | -5.9769 | H |
| 316 | C316 | 10.9472 | -3.5256 | -4.5089 | C |
| 317 | H317 | 11.2909 | -4.1109 | -3.6153 | H |
| 318 | H318 | 10.1777 | -2.7877 | -4.1570 | H |
| 319 | C319 | 12.1528 | -2.7683 | -5.0933 | C |
| 320 | H320 | 12.8828 | -3.5297 | -5.5187 | H |
| 321 | C321 | 11.6529 | -1.9319 | -6.2718 | C |
| 322 | O322 | 11.0298 | -0.8701 | -6.2839 | O |
| 323 | O323 | 11.9644 | -2.5190 | -7.4676 | O |
| 324 | C324 | 11.4880 | -1.8974 | -8.6689 | C |
| 325 | H325 | 12.1892 | -2.2936 | -9.4519 | H |
| 326 | H326 | 11.5860 | -0.7832 | -8.5893 | H |
| 327 | C327 | 10.0605 | -2.3007 | -8.9478 | C |
| 328 | H328 | 9.7505  | -1.9134 | -9.9473 | H |
| 329 | H329 | 9.9569  | -3.4121 | -8.9394 | H |
| 330 | H330 | 9.3799  | -1.8750 | -8.1694 | H |
| 331 | N331 | 12.8930 | -1.9806 | -4.1451 | N |

|     |      |         |         |         |   |
|-----|------|---------|---------|---------|---|
| 332 | H332 | 13.8097 | -2.3288 | -3.9343 | H |
| 333 | C333 | 12.3265 | -1.0710 | -3.2745 | C |
| 334 | O334 | 11.1274 | -0.7242 | -3.3569 | O |
| 335 | C335 | 13.2347 | -0.4623 | -2.2183 | C |
| 336 | H336 | 12.6327 | -0.3796 | -1.2746 | H |
| 337 | H337 | 14.1161 | -1.1249 | -2.0014 | H |
| 338 | C338 | 13.6990 | 0.9100  | -2.6578 | C |
| 339 | H339 | 14.2429 | 0.8334  | -3.6358 | H |
| 340 | H340 | 12.8035 | 1.5678  | -2.8238 | H |
| 341 | C341 | 14.6073 | 1.5302  | -1.6175 | C |
| 342 | H342 | 14.1083 | 1.4971  | -0.6129 | H |
| 343 | H343 | 15.5525 | 0.9290  | -1.5371 | H |
| 344 | C344 | 14.9448 | 2.9643  | -1.9655 | C |
| 345 | H345 | 15.3828 | 3.0109  | -2.9971 | H |
| 346 | H346 | 14.0039 | 3.5775  | -1.9776 | H |
| 347 | C347 | 15.9227 | 3.5512  | -0.9704 | C |
| 348 | H348 | 15.5223 | 3.4236  | 0.0701  | H |
| 349 | H349 | 16.8938 | 2.9894  | -1.0213 | H |
| 350 | C350 | 16.1726 | 5.0200  | -1.2377 | C |
| 351 | H351 | 16.5242 | 5.1581  | -2.2939 | H |
| 352 | H352 | 15.2104 | 5.5893  | -1.1323 | H |
| 353 | C353 | 17.2032 | 5.5804  | -0.2811 | C |
| 354 | H354 | 16.8857 | 5.3753  | 0.7755  | H |
| 355 | H355 | 18.1849 | 5.0580  | -0.4376 | H |
| 356 | C356 | 17.3858 | 7.0706  | -0.4727 | C |
| 357 | H357 | 16.4147 | 7.5970  | -0.2696 | H |
| 358 | H358 | 17.6603 | 7.2840  | -1.5392 | H |
| 359 | C359 | 18.4597 | 7.6117  | 0.4468  | C |
| 360 | H360 | 18.2170 | 7.3410  | 1.5084  | H |
| 361 | H361 | 19.4439 | 7.1301  | 0.2005  | H |
| 362 | C362 | 18.5853 | 9.1150  | 0.3249  | C |
| 363 | H363 | 18.7904 | 9.3916  | -0.7427 | H |
| 364 | H364 | 17.6120 | 9.5975  | 0.6103  | H |
| 365 | C365 | 19.6935 | 9.6458  | 1.2090  | C |
| 366 | H366 | 19.5167 | 9.3224  | 2.2689  | H |
| 367 | H367 | 20.6753 | 9.2042  | 0.8892  | H |
| 368 | C368 | 19.7703 | 11.1559 | 1.1471  | C |
| 369 | H369 | 19.9205 | 11.4829 | 0.0845  | H |
| 370 | H370 | 18.7968 | 11.5961 | 1.4937  | H |
| 371 | C371 | 20.8993 | 11.6868 | 2.0049  | C |
| 372 | H372 | 21.8768 | 11.2747 | 1.6356  | H |
| 373 | H373 | 20.7681 | 11.3266 | 3.0596  | H |
| 374 | C374 | 20.9426 | 13.1929 | 1.9868  | C |
| 375 | H375 | 19.9821 | 13.6182 | 2.3685  | H |
| 376 | H376 | 21.7749 | 13.5660 | 2.6309  | H |
| 377 | H377 | 21.1034 | 13.5706 | 0.9481  | H |
| 378 | N378 | 4.1013  | -7.9058 | -4.8243 | N |
| 379 | H379 | 3.7041  | -7.1137 | -5.2899 | H |
| 380 | C380 | 3.1876  | -8.7706 | -4.1218 | C |
| 381 | H381 | 3.7674  | -9.6208 | -3.6612 | H |
| 382 | H382 | 2.4815  | -9.1969 | -4.8923 | H |
| 383 | C383 | 2.3668  | -8.0728 | -3.0353 | C |
| 384 | H384 | 1.9392  | -7.1126 | -3.4333 | H |
| 385 | H385 | 3.0274  | -7.8162 | -2.1667 | H |
| 386 | C386 | 1.2409  | -8.9747 | -2.5789 | C |
| 387 | H387 | 1.6393  | -9.9940 | -2.3233 | H |
| 388 | H388 | 0.5078  | -9.1131 | -3.4184 | H |



|     |      |         |          |         |   |
|-----|------|---------|----------|---------|---|
| 389 | C389 | 0.5375  | -8.3913  | -1.3722 | C |
| 390 | H390 | 0.2684  | -7.3207  | -1.5699 | H |
| 391 | H391 | 1.2144  | -8.4133  | -0.4765 | H |
| 392 | C392 | -0.7501 | -9.1750  | -1.0624 | C |
| 393 | H393 | -1.3937 | -9.1931  | -2.0002 | H |
| 394 | C394 | -0.3494 | -10.6253 | -0.7749 | C |
| 395 | O395 | 0.2136  | -11.1088 | 0.2078  | O |
| 396 | O396 | -0.6755 | -11.4533 | -1.8128 | O |
| 397 | C397 | -0.3801 | -12.8507 | -1.6809 | C |
| 398 | H398 | -1.0453 | -13.3161 | -2.4579 | H |
| 399 | H399 | -0.6729 | -13.2036 | -0.6577 | H |
| 400 | C400 | 1.0762  | -13.1341 | -1.9564 | C |
| 401 | H401 | 1.2200  | -14.2296 | -2.1131 | H |
| 402 | H402 | 1.4169  | -12.5893 | -2.8692 | H |
| 403 | H403 | 1.7068  | -12.8117 | -1.0897 | H |
| 404 | N404 | -1.5672 | -8.6227  | -0.0205 | N |
| 405 | H405 | -2.5131 | -8.4088  | -0.2759 | H |
| 406 | C406 | -1.1190 | -8.2733  | 1.2379  | C |
| 407 | O407 | 0.0708  | -8.4420  | 1.5855  | O |
| 408 | C408 | -2.1604 | -7.7120  | 2.1903  | C |
| 409 | H409 | -2.9074 | -7.0811  | 1.6328  | H |
| 410 | H410 | -2.7131 | -8.5845  | 2.6314  | H |
| 411 | C411 | -1.5228 | -6.8929  | 3.2915  | C |
| 412 | H412 | -0.7165 | -7.4927  | 3.7930  | H |
| 413 | H413 | -1.0304 | -5.9880  | 2.8483  | H |
| 414 | C414 | -2.5630 | -6.4699  | 4.3072  | C |
| 415 | H415 | -3.3951 | -5.9226  | 3.7876  | H |
| 416 | H416 | -3.0140 | -7.3807  | 4.7831  | H |
| 417 | C417 | -1.9666 | -5.5823  | 5.3786  | C |
| 418 | H418 | -1.5520 | -4.6516  | 4.9092  | H |
| 419 | H419 | -1.1100 | -6.1117  | 5.8756  | H |
| 420 | C420 | -3.0047 | -5.2116  | 6.4164  | C |
| 421 | H421 | -3.8720 | -4.7038  | 5.9151  | H |
| 422 | H422 | -3.4023 | -6.1440  | 6.8978  | H |
| 423 | C423 | -2.4301 | -4.2994  | 7.4790  | C |
| 424 | H424 | -1.5483 | -4.7952  | 7.9666  | H |
| 425 | H425 | -2.0565 | -3.3548  | 7.0030  | H |
| 426 | C426 | -3.4678 | -3.9651  | 8.5293  | C |
| 427 | H427 | -4.3550 | -3.4804  | 8.0401  | H |
| 428 | H428 | -3.8328 | -4.9110  | 9.0099  | H |
| 429 | C429 | -2.9079 | -3.0419  | 9.5901  | C |
| 430 | H430 | -2.5565 | -2.0892  | 9.1133  | H |
| 431 | H431 | -2.0134 | -3.5196  | 10.0727 | H |
| 432 | C432 | -3.9466 | -2.7298  | 10.6461 | C |
| 433 | H433 | -4.8447 | -2.2592  | 10.1631 | H |
| 434 | H434 | -4.2926 | -3.6836  | 11.1255 | H |
| 435 | C435 | -3.3966 | -1.8005  | 11.7066 | C |
| 436 | H436 | -2.4963 | -2.2683  | 12.1882 | H |
| 437 | H437 | -3.0562 | -0.8440  | 11.2294 | H |
| 438 | C438 | -4.4371 | -1.4993  | 12.7640 | C |
| 439 | H439 | -5.3401 | -1.0364  | 12.2830 | H |
| 440 | H440 | -4.7736 | -2.4565  | 13.2431 | H |
| 441 | C441 | -3.8924 | -0.5662  | 13.8237 | C |
| 442 | H442 | -3.5567 | 0.3916   | 13.3458 | H |
| 443 | H443 | -2.9898 | -1.0290  | 14.3060 | H |
| 444 | C444 | -4.9327 | -0.2674  | 14.8823 | C |
| 445 | H445 | -5.8369 | 0.1928   | 14.4004 | H |

|     |      |         |         |          |   |
|-----|------|---------|---------|----------|---|
| 446 | H446 | -5.2672 | -1.2270 | 15.3583  | H |
| 447 | C447 | -4.3938 | 0.6609  | 15.9398  | C |
| 448 | H448 | -3.5075 | 0.2071  | 16.4473  | H |
| 449 | H449 | -4.0783 | 1.6326  | 15.4884  | H |
| 450 | H450 | -5.1750 | 0.8671  | 16.7106  | H |
| 451 | C451 | 2.1787  | -3.7943 | -6.6832  | C |
| 452 | O452 | 1.6065  | -2.7110 | -6.9354  | O |
| 453 | C453 | 1.3701  | -5.0006 | -6.1594  | C |
| 454 | O454 | 1.9408  | -5.9095 | -5.5168  | O |
| 455 | N455 | 3.5118  | -4.0115 | -6.8944  | N |
| 456 | H456 | 3.9215  | -4.8409 | -6.5107  | H |
| 457 | C457 | 4.4166  | -2.9460 | -7.2420  | C |
| 458 | H458 | 3.8275  | -2.1012 | -7.7003  | H |
| 459 | H459 | 5.1223  | -3.3537 | -8.0226  | H |
| 460 | C460 | 5.2385  | -2.4096 | -6.0687  | C |
| 461 | H461 | 5.7465  | -3.2602 | -5.5386  | H |
| 462 | H462 | 4.5618  | -1.9058 | -5.3301  | H |
| 463 | C463 | 6.2752  | -1.4282 | -6.5695  | C |
| 464 | H464 | 5.7994  | -0.6787 | -7.2594  | H |
| 465 | H465 | 7.0525  | -1.9737 | -7.1690  | H |
| 466 | C466 | 6.9316  | -0.7047 | -5.4139  | C |
| 467 | H467 | 7.3340  | -1.4522 | -4.6806  | H |
| 468 | H468 | 6.1823  | -0.0666 | -4.8737  | H |
| 469 | C469 | 8.0925  | 0.1765  | -5.9087  | C |
| 470 | H470 | 8.7926  | -0.4702 | -6.5298  | H |
| 471 | C471 | 7.5049  | 1.2263  | -6.8538  | C |
| 472 | O472 | 6.8497  | 2.2391  | -6.6072  | O |
| 473 | O473 | 7.7653  | 0.9213  | -8.1619  | O |
| 474 | C474 | 7.2085  | 1.7681  | -9.1760  | C |
| 475 | H475 | 7.8782  | 1.5789  | -10.0577 | H |
| 476 | H476 | 7.2776  | 2.8419  | -8.8605  | H |
| 477 | C477 | 5.7804  | 1.3776  | -9.4706  | C |
| 478 | H478 | 5.1327  | 1.5872  | -8.5836  | H |
| 479 | H479 | 5.4026  | 1.9664  | -10.3398 | H |
| 480 | H480 | 5.7115  | 0.2894  | -9.7097  | H |
| 481 | N481 | 8.8943  | 0.7676  | -4.8730  | N |
| 482 | H482 | 9.8301  | 0.4120  | -4.8056  | H |
| 483 | C483 | 8.3871  | 1.4903  | -3.8120  | C |
| 484 | O484 | 7.1784  | 1.8064  | -3.7382  | O |
| 485 | C485 | 9.3666  | 1.9305  | -2.7368  | C |
| 486 | H486 | 8.8760  | 1.7378  | -1.7459  | H |
| 487 | H487 | 10.3164 | 1.3306  | -2.7667  | H |
| 488 | C488 | 9.6696  | 3.4063  | -2.8868  | C |
| 489 | H489 | 10.0903 | 3.6068  | -3.9071  | H |
| 490 | H490 | 8.7145  | 3.9911  | -2.7986  | H |
| 491 | C491 | 10.6545 | 3.8639  | -1.8323  | C |
| 492 | H492 | 10.2853 | 3.5650  | -0.8156  | H |
| 493 | H493 | 11.6403 | 3.3497  | -1.9904  | H |
| 494 | C494 | 10.8492 | 5.3643  | -1.8778  | C |
| 495 | H495 | 11.1518 | 5.6756  | -2.9122  | H |
| 496 | H496 | 9.8751  | 5.8749  | -1.6505  | H |
| 497 | C497 | 11.9015 | 5.8091  | -0.8849  | C |
| 498 | H498 | 11.6416 | 5.4243  | 0.1366   | H |
| 499 | H499 | 12.8936 | 5.3624  | -1.1632  | H |
| 500 | C500 | 12.0182 | 7.3175  | -0.8415  | C |
| 501 | H501 | 12.2260 | 7.7107  | -1.8713  | H |
| 502 | H502 | 11.0405 | 7.7597  | -0.5098  | H |

|     |      |         |          |         |   |
|-----|------|---------|----------|---------|---|
| 503 | C503 | 13.1196 | 7.7533   | 0.1008  | C |
| 504 | H504 | 12.9496 | 7.3003   | 1.1133  | H |
| 505 | H505 | 14.1068 | 7.3683   | -0.2711 | H |
| 506 | C506 | 13.1768 | 9.2606   | 0.2253  | C |
| 507 | H507 | 12.2052 | 9.6398   | 0.6421  | H |
| 508 | H508 | 13.3016 | 9.7194   | -0.7907 | H |
| 509 | C509 | 14.3176 | 9.6925   | 1.1215  | C |
| 510 | H510 | 14.2268 | 9.1838   | 2.1176  | H |
| 511 | H511 | 15.2936 | 9.3658   | 0.6722  | H |
| 512 | C512 | 14.3260 | 11.1930  | 1.3193  | C |
| 513 | H513 | 14.3784 | 11.7049  | 0.3225  | H |
| 514 | H514 | 13.3651 | 11.5130  | 1.8049  | H |
| 515 | C515 | 15.4966 | 11.6270  | 2.1752  | C |
| 516 | H516 | 15.4733 | 11.0755  | 3.1521  | H |
| 517 | H517 | 16.4586 | 11.3528  | 1.6648  | H |
| 518 | C518 | 15.4646 | 13.1176  | 2.4346  | C |
| 519 | H519 | 15.4619 | 13.6705  | 1.4585  | H |
| 520 | H520 | 14.5134 | 13.3856  | 2.9687  | H |
| 521 | C521 | 16.6518 | 13.5592  | 3.2638  | C |
| 522 | H522 | 17.6021 | 13.3220  | 2.7141  | H |
| 523 | H523 | 16.6735 | 12.9786  | 4.2238  | H |
| 524 | C524 | 16.5936 | 15.0342  | 3.5664  | C |
| 525 | H525 | 15.6612 | 15.2833  | 4.1299  | H |
| 526 | H526 | 17.4721 | 15.3396  | 4.1843  | H |
| 527 | H527 | 16.6012 | 15.6313  | 2.6225  | H |
| 528 | N528 | 0.0441  | -5.0274  | -6.4867 | N |
| 529 | H529 | -0.3689 | -4.1898  | -6.8473 | H |
| 530 | C530 | -0.8578 | -6.0196  | -5.9594 | C |
| 531 | H531 | -0.2610 | -6.9151  | -5.6233 | H |
| 532 | H532 | -1.5292 | -6.3370  | -6.8093 | H |
| 533 | C533 | -1.7291 | -5.5314  | -4.8006 | C |
| 534 | H534 | -2.2054 | -4.5488  | -5.0666 | H |
| 535 | H535 | -1.0942 | -5.3655  | -3.8917 | H |
| 536 | C536 | -2.8053 | -6.5511  | -4.4993 | C |
| 537 | H537 | -2.3515 | -7.5733  | -4.3884 | H |
| 538 | H538 | -3.5226 | -6.6059  | -5.3617 | H |
| 539 | C539 | -3.5506 | -6.1909  | -3.2321 | C |
| 540 | H540 | -3.8775 | -5.1189  | -3.2754 | H |
| 541 | H541 | -2.8820 | -6.3079  | -2.3378 | H |
| 542 | C542 | -4.7952 | -7.0799  | -3.0636 | C |
| 543 | H543 | -5.4279 | -6.9921  | -4.0048 | H |
| 544 | C544 | -4.3193 | -8.5336  | -2.9860 | C |
| 545 | O545 | -3.7430 | -9.1276  | -2.0741 | O |
| 546 | O546 | -4.5893 | -9.2132  | -4.1409 | O |
| 547 | C547 | -4.2191 | -10.5969 | -4.2138 | C |
| 548 | H548 | -4.8626 | -10.9800 | -5.0516 | H |
| 549 | H549 | -4.4857 | -11.1112 | -3.2539 | H |
| 550 | C550 | -2.7513 | -10.7560 | -4.5255 | C |
| 551 | H551 | -2.5462 | -11.8105 | -4.8281 | H |
| 552 | H552 | -2.4496 | -10.0746 | -5.3565 | H |
| 553 | H553 | -2.1334 | -10.5175 | -3.6232 | H |
| 554 | N554 | -5.6509 | -6.7324  | -1.9656 | N |
| 555 | H555 | -6.6002 | -6.5163  | -2.2060 | H |
| 556 | C556 | -5.2347 | -6.5632  | -0.6605 | C |
| 557 | O557 | -4.0439 | -6.7392  | -0.3181 | O |
| 558 | C558 | -6.3078 | -6.1969  | 0.3498  | C |
| 559 | H559 | -7.1375 | -5.6125  | -0.1364 | H |

|     |      |          |         |         |   |
|-----|------|----------|---------|---------|---|
| 560 | H560 | -6.7440  | -7.1593 | 0.7300  | H |
| 561 | C561 | -5.7319  | -5.3980 | 1.4990  | C |
| 562 | H562 | -4.8401  | -5.9324 | 1.9239  | H |
| 563 | H563 | -5.3714  | -4.4053 | 1.1215  | H |
| 564 | C564 | -6.7752  | -5.1917 | 2.5763  | C |
| 565 | H565 | -7.6939  | -4.7272 | 2.1267  | H |
| 566 | H566 | -7.0805  | -6.1856 | 2.9982  | H |
| 567 | C567 | -6.2556  | -4.3066 | 3.6888  | C |
| 568 | H568 | -6.0040  | -3.2936 | 3.2775  | H |
| 569 | H569 | -5.3068  | -4.7393 | 4.1051  | H |
| 570 | C570 | -7.2794  | -4.1684 | 4.7952  | C |
| 571 | H571 | -8.2464  | -3.7896 | 4.3675  | H |
| 572 | H572 | -7.4886  | -5.1770 | 5.2403  | H |
| 573 | C573 | -6.8032  | -3.2249 | 5.8786  | C |
| 574 | H574 | -5.8137  | -3.5757 | 6.2772  | H |
| 575 | H575 | -6.6407  | -2.2036 | 5.4437  | H |
| 576 | C576 | -7.8060  | -3.1436 | 7.0097  | C |
| 577 | H577 | -8.8075  | -2.8380 | 6.6036  | H |
| 578 | H578 | -7.9333  | -4.1583 | 7.4714  | H |
| 579 | C579 | -7.3678  | -2.1555 | 8.0690  | C |
| 580 | H580 | -7.2798  | -1.1327 | 7.6163  | H |
| 581 | H581 | -6.3495  | -2.4371 | 8.4497  | H |
| 582 | C582 | -8.3483  | -2.1195 | 9.2217  | C |
| 583 | H583 | -9.3741  | -1.8737 | 8.8365  | H |
| 584 | H584 | -8.4086  | -3.1352 | 9.6947  | H |
| 585 | C585 | -7.9405  | -1.0986 | 10.2618 | C |
| 586 | H586 | -6.9015  | -1.3237 | 10.6238 | H |
| 587 | H587 | -7.9141  | -0.0778 | 9.7971  | H |
| 588 | C588 | -8.8972  | -1.0988 | 11.4349 | C |
| 589 | H589 | -9.9405  | -0.8977 | 11.0714 | H |
| 590 | H590 | -8.9048  | -2.1139 | 11.9129 | H |
| 591 | C591 | -8.5084  | -0.0572 | 12.4616 | C |
| 592 | H592 | -8.5304  | 0.9612  | 11.9914 | H |
| 593 | H593 | -7.4543  | -0.2403 | 12.8034 | H |
| 594 | C594 | -9.4388  | -0.0846 | 13.6556 | C |
| 595 | H595 | -10.4942 | 0.0909  | 13.3134 | H |
| 596 | H596 | -9.4114  | -1.1029 | 14.1267 | H |
| 597 | C597 | -9.0560  | 0.9555  | 14.6764 | C |
| 598 | H598 | -8.0107  | 0.7886  | 15.0351 | H |
| 599 | H599 | -9.1146  | 1.9804  | 14.2364 | H |
| 600 | H600 | -9.7429  | 0.9091  | 15.5555 | H |
| 601 | C601 | -1.9550  | -0.6598 | -7.5640 | C |
| 602 | O602 | -2.5560  | 0.4369  | -7.5951 | O |
| 603 | C603 | -2.7369  | -1.9694 | -7.3256 | C |
| 604 | O604 | -2.1471  | -2.9892 | -6.9046 | O |
| 605 | N605 | -0.6127  | -0.7902 | -7.7846 | N |
| 606 | H606 | -0.1830  | -1.6707 | -7.5778 | H |
| 607 | C607 | 0.2626   | 0.3494  | -7.8893 | C |
| 608 | H608 | -0.3478  | 1.2553  | -8.1680 | H |
| 609 | H609 | 0.9850   | 0.1339  | -8.7290 | H |
| 610 | C610 | 1.0605   | 0.6505  | -6.6194 | C |
| 611 | H611 | 1.5744   | -0.2827 | -6.2617 | H |
| 612 | H612 | 0.3665   | 0.9882  | -5.8061 | H |
| 613 | C613 | 2.0902   | 1.7245  | -6.8955 | C |
| 614 | H614 | 1.6099   | 2.6030  | -7.4050 | H |
| 615 | H615 | 2.8697   | 1.3259  | -7.5989 | H |
| 616 | C616 | 2.7432   | 2.1820  | -5.6092 | C |

|     |      |         |         |         |   |
|-----|------|---------|---------|---------|---|
| 617 | H617 | 3.1305  | 1.2917  | -5.0471 | H |
| 618 | H618 | 1.9957  | 2.6994  | -4.9504 | H |
| 619 | C619 | 3.9168  | 3.1343  | -5.8971 | C |
| 620 | H620 | 4.5903  | 2.6501  | -6.6752 | H |
| 621 | C621 | 3.3468  | 4.4058  | -6.5317 | C |
| 622 | O622 | 2.7287  | 5.3370  | -6.0144 | O |
| 623 | O623 | 3.5839  | 4.4511  | -7.8773 | O |
| 624 | C624 | 3.1537  | 5.6123  | -8.6006 | C |
| 625 | H625 | 3.7829  | 5.5700  | -9.5307 | H |
| 626 | H626 | 3.3945  | 6.5356  | -8.0115 | H |
| 627 | C627 | 1.6818  | 5.5465  | -8.9260 | C |
| 628 | H628 | 1.4306  | 6.3322  | -9.6784 | H |
| 629 | H629 | 1.4151  | 4.5455  | -9.3417 | H |
| 630 | H630 | 1.0698  | 5.7284  | -8.0071 | H |
| 631 | N631 | 4.7492  | 3.4355  | -4.7650 | N |
| 632 | H632 | 5.6970  | 3.1133  | -4.8283 | H |
| 633 | C633 | 4.2790  | 3.8834  | -3.5479 | C |
| 634 | O634 | 3.0669  | 4.1251  | -3.3499 | O |
| 635 | C635 | 5.3009  | 4.1158  | -2.4471 | C |
| 636 | H636 | 4.8820  | 3.6707  | -1.5061 | H |
| 637 | H637 | 6.2750  | 3.5991  | -2.6629 | H |
| 638 | C638 | 5.5190  | 5.6034  | -2.2672 | C |
| 639 | H639 | 5.8589  | 6.0566  | -3.2355 | H |
| 640 | H640 | 4.5430  | 6.0895  | -1.9960 | H |
| 641 | C641 | 6.5477  | 5.8778  | -1.1915 | C |
| 642 | H642 | 6.2595  | 5.3462  | -0.2465 | H |
| 643 | H643 | 7.5442  | 5.4697  | -1.5102 | H |
| 644 | C644 | 6.6663  | 7.3627  | -0.9224 | C |
| 645 | H645 | 6.8765  | 7.9043  | -1.8823 | H |
| 646 | H646 | 5.6872  | 7.7508  | -0.5320 | H |
| 647 | C647 | 7.7648  | 7.6572  | 0.0759  | C |
| 648 | H648 | 7.5935  | 7.0630  | 1.0121  | H |
| 649 | H649 | 8.7537  | 7.3321  | -0.3454 | H |
| 650 | C650 | 7.8160  | 9.1317  | 0.4136  | C |
| 651 | H651 | 7.9278  | 9.7308  | -0.5285 | H |
| 652 | H652 | 6.8462  | 9.4409  | 0.8882  | H |
| 653 | C653 | 8.9630  | 9.4427  | 1.3508  | C |
| 654 | H654 | 8.8849  | 8.8013  | 2.2680  | H |
| 655 | H655 | 9.9364  | 9.1883  | 0.8519  | H |
| 656 | C656 | 8.9636  | 10.9022 | 1.7517  | C |
| 657 | H657 | 8.0094  | 11.1424 | 2.2932  | H |
| 658 | H658 | 8.9925  | 11.5458 | 0.8332  | H |
| 659 | C659 | 10.1470 | 11.2288 | 2.6370  | C |
| 660 | H660 | 10.1494 | 10.5482 | 3.5289  | H |
| 661 | H661 | 11.1009 | 11.0400 | 2.0752  | H |
| 662 | C662 | 10.1057 | 12.6694 | 3.0992  | C |
| 663 | H663 | 10.0635 | 13.3503 | 2.2086  | H |
| 664 | H664 | 9.1694  | 12.8456 | 3.6941  | H |
| 665 | C665 | 11.3153 | 13.0115 | 3.9422  | C |
| 666 | H666 | 11.3857 | 12.2993 | 4.8063  | H |
| 667 | H667 | 12.2489 | 12.8825 | 3.3315  | H |
| 668 | C668 | 11.2385 | 14.4312 | 4.4608  | C |
| 669 | H669 | 11.1431 | 15.1430 | 3.5990  | H |
| 670 | H670 | 10.3169 | 14.5512 | 5.0916  | H |
| 671 | C671 | 12.4616 | 14.7876 | 5.2788  | C |
| 672 | H672 | 13.3795 | 14.7020 | 4.6371  | H |
| 673 | H673 | 12.5771 | 14.0518 | 6.1182  | H |

|     |      |          |         |         |   |
|-----|------|----------|---------|---------|---|
| 674 | C674 | 12.3615  | 16.1826 | 5.8395  | C |
| 675 | H675 | 11.4610  | 16.2795 | 6.4943  | H |
| 676 | H676 | 13.2672  | 16.4240 | 6.4464  | H |
| 677 | H677 | 12.2774  | 16.9334 | 5.0169  | H |
| 678 | N678 | -4.0643  | -1.9481 | -7.6473 | N |
| 679 | H679 | -4.4959  | -1.0611 | -7.8177 | H |
| 680 | C680 | -4.9433  | -3.0533 | -7.3622 | C |
| 681 | H681 | -4.3258  | -3.9862 | -7.2226 | H |
| 682 | H682 | -5.6003  | -3.1931 | -8.2692 | H |
| 683 | C683 | -5.8357  | -2.8518 | -6.1360 | C |
| 684 | H684 | -6.3403  | -1.8491 | -6.1903 | H |
| 685 | H685 | -5.2119  | -2.8677 | -5.2047 | H |
| 686 | C686 | -6.8815  | -3.9432 | -6.0749 | C |
| 687 | H687 | -6.3946  | -4.9524 | -6.1612 | H |
| 688 | H688 | -7.5799  | -3.8437 | -6.9488 | H |
| 689 | C689 | -7.6639  | -3.8697 | -4.7812 | C |
| 690 | H690 | -8.0418  | -2.8252 | -4.6255 | H |
| 691 | H691 | -7.0058  | -4.1275 | -3.9090 | H |
| 692 | C692 | -8.8656  | -4.8301 | -4.8199 | C |
| 693 | H693 | -9.4738  | -4.6047 | -5.7542 | H |
| 694 | C694 | -8.3177  | -6.2510 | -4.9814 | C |
| 695 | O695 | -7.7464  | -6.9738 | -4.1643 | O |
| 696 | O696 | -8.5077  | -6.7216 | -6.2508 | O |
| 697 | C697 | -8.0596  | -8.0499 | -6.5539 | C |
| 698 | H698 | -8.6532  | -8.3063 | -7.4729 | H |
| 699 | H699 | -8.3286  | -8.7416 | -5.7135 | H |
| 700 | C700 | -6.5759  | -8.0786 | -6.8273 | C |
| 701 | H701 | -6.3053  | -9.0442 | -7.3170 | H |
| 702 | H702 | -6.2836  | -7.2365 | -7.4992 | H |
| 703 | H703 | -6.0013  | -7.9906 | -5.8709 | H |
| 704 | N704 | -9.7702  | -4.7235 | -3.7111 | N |
| 705 | H705 | -10.7204 | -4.5042 | -3.9448 | H |
| 706 | C706 | -9.4002  | -4.7739 | -2.3826 | C |
| 707 | O707 | -8.2122  | -4.9573 | -2.0343 | O |
| 708 | C708 | -10.5157 | -4.6425 | -1.3603 | C |
| 709 | H709 | -11.3794 | -4.0523 | -1.7743 | H |
| 710 | H710 | -10.8832 | -5.6804 | -1.1402 | H |
| 711 | C711 | -10.0174 | -3.9869 | -0.0906 | C |
| 712 | H712 | -9.0943  | -4.5144 | 0.2716  | H |
| 713 | H713 | -9.7266  | -2.9254 | -0.3067 | H |
| 714 | C714 | -11.0867 | -4.0192 | 0.9805  | C |
| 715 | H715 | -12.0325 | -3.5614 | 0.5833  | H |
| 716 | H716 | -11.3211 | -5.0840 | 1.2457  | H |
| 717 | C717 | -10.6462 | -3.2717 | 2.2206  | C |
| 718 | H718 | -10.4701 | -2.1932 | 1.9665  | H |
| 719 | H719 | -9.6698  | -3.6886 | 2.5862  | H |
| 720 | C720 | -11.6844 | -3.3741 | 3.3174  | C |
| 721 | H721 | -12.6766 | -3.0166 | 2.9315  | H |
| 722 | H722 | -11.8134 | -4.4487 | 3.6131  | H |
| 723 | C723 | -11.2894 | -2.5573 | 4.5286  | C |
| 724 | H724 | -10.2732 | -2.8769 | 4.8841  | H |
| 725 | H725 | -11.2136 | -1.4748 | 4.2435  | H |
| 726 | C726 | -12.2929 | -2.7194 | 5.6501  | C |
| 727 | H727 | -13.3187 | -2.4512 | 5.2799  | H |
| 728 | H728 | -12.3283 | -3.7942 | 5.9700  | H |
| 729 | C729 | -11.9392 | -1.8473 | 6.8354  | C |
| 730 | H730 | -11.9505 | -0.7691 | 6.5254  | H |

|     |      |          |         |         |   |
|-----|------|----------|---------|---------|---|
| 731 | H731 | -10.8954 | -2.0815 | 7.1773  | H |
| 732 | C732 | -12.9066 | -2.0577 | 7.9804  | C |
| 733 | H733 | -13.9555 | -1.8651 | 7.6284  | H |
| 734 | H734 | -12.8629 | -3.1269 | 8.3174  | H |
| 735 | C735 | -12.5873 | -1.1442 | 9.1440  | C |
| 736 | H736 | -11.5245 | -1.3059 | 9.4691  | H |
| 737 | H737 | -12.6728 | -0.0745 | 8.8166  | H |
| 738 | C738 | -13.5178 | -1.3944 | 10.3114 | C |
| 739 | H739 | -14.5828 | -1.2620 | 9.9807  | H |
| 740 | H740 | -13.4095 | -2.4563 | 10.6571 | H |
| 741 | C741 | -13.2223 | -0.4535 | 11.4593 | C |
| 742 | H742 | -13.3683 | 0.6070  | 11.1235 | H |
| 743 | H743 | -12.1463 | -0.5574 | 11.7644 | H |
| 744 | C744 | -14.1146 | -0.7359 | 12.6493 | C |
| 745 | H745 | -15.1910 | -0.6417 | 12.3423 | H |
| 746 | H746 | -13.9610 | -1.7946 | 12.9880 | H |
| 747 | C747 | -13.8263 | 0.2070  | 13.7888 | C |
| 748 | H748 | -12.7574 | 0.1266  | 14.1050 | H |
| 749 | H749 | -14.0216 | 1.2640  | 13.4852 | H |
| 750 | H750 | -14.4737 | -0.0334 | 14.6662 | H |
| 751 | C751 | -6.1671  | 2.4842  | -7.6749 | C |
| 752 | O752 | -6.7888  | 3.5360  | -7.4074 | O |
| 753 | C753 | -6.9274  | 1.1496  | -7.8258 | C |
| 754 | O754 | -6.3322  | 0.0611  | -7.6661 | O |
| 755 | N755 | -4.8208  | 2.4396  | -7.8996 | N |
| 756 | H756 | -4.3764  | 1.5439  | -7.9442 | H |
| 757 | C757 | -3.9669  | 3.5789  | -7.6812 | C |
| 758 | H758 | -4.5981  | 4.5132  | -7.6701 | H |
| 759 | H759 | -3.2622  | 3.6355  | -8.5611 | H |
| 760 | C760 | -3.1411  | 3.5142  | -6.3948 | C |
| 761 | H761 | -2.6153  | 2.5237  | -6.3254 | H |
| 762 | H762 | -3.8154  | 3.6044  | -5.5038 | H |
| 763 | C763 | -2.1241  | 4.6338  | -6.3878 | C |
| 764 | H764 | -2.6282  | 5.6113  | -6.6172 | H |
| 765 | H765 | -1.3676  | 4.4595  | -7.1993 | H |
| 766 | C766 | -1.4268  | 4.7318  | -5.0483 | C |
| 767 | H767 | -1.0205  | 3.7284  | -4.7559 | H |
| 768 | H768 | -2.1494  | 5.0535  | -4.2516 | H |
| 769 | C769 | -0.2616  | 5.7344  | -5.1236 | C |
| 770 | H770 | 0.4226   | 5.4211  | -5.9767 | H |
| 771 | C771 | -0.8468  | 7.0967  | -5.5058 | C |
| 772 | O772 | -1.5003  | 7.8984  | -4.8371 | O |
| 773 | O773 | -0.5901  | 7.4048  | -6.8130 | O |
| 774 | C774 | -1.0836  | 8.6676  | -7.2925 | C |
| 775 | H775 | -0.5228  | 9.4847  | -6.7682 | H |
| 776 | H776 | -2.1742  | 8.7555  | -7.0454 | H |
| 777 | C777 | -0.8386  | 8.6802  | -8.7820 | C |
| 778 | H778 | -1.4853  | 7.9276  | -9.2928 | H |
| 779 | H779 | -1.0730  | 9.6951  | -9.1822 | H |
| 780 | H780 | 0.2277   | 8.4333  | -9.0050 | H |
| 781 | N781 | 0.5621   | 5.8129  | -3.9514 | N |
| 782 | H782 | 1.5270   | 5.5725  | -4.0826 | H |
| 783 | C783 | 0.0920   | 6.0128  | -2.6710 | C |
| 784 | O784 | -1.1242  | 6.1794  | -2.4279 | O |
| 785 | C785 | 1.1192   | 6.0594  | -1.5513 | C |
| 786 | H786 | 0.7129   | 5.4510  | -0.7008 | H |
| 787 | H787 | 2.0973   | 5.6012  | -1.8615 | H |

|     |      |          |         |         |   |
|-----|------|----------|---------|---------|---|
| 788 | C788 | 1.3204   | 7.4955  | -1.1154 | C |
| 789 | H789 | 1.6388   | 8.1166  | -1.9939 | H |
| 790 | H790 | 0.3420   | 7.9107  | -0.7506 | H |
| 791 | C791 | 2.3617   | 7.5976  | -0.0216 | C |
| 792 | H792 | 2.0992   | 6.9031  | 0.8193  | H |
| 793 | H793 | 3.3601   | 7.2729  | -0.4202 | H |
| 794 | C794 | 2.4552   | 9.0155  | 0.5003  | C |
| 795 | H795 | 2.6258   | 9.7208  | -0.3556 | H |
| 796 | H796 | 1.4790   | 9.3035  | 0.9757  | H |
| 797 | C797 | 3.5740   | 9.1653  | 1.5084  | C |
| 798 | H798 | 3.4368   | 8.4239  | 2.3390  | H |
| 799 | H799 | 4.5573   | 8.9340  | 1.0179  | H |
| 800 | C800 | 3.6068   | 10.5672 | 2.0783  | C |
| 801 | H801 | 3.6787   | 11.3116 | 1.2417  | H |
| 802 | H802 | 2.6453   | 10.7730 | 2.6212  | H |
| 803 | C803 | 4.7738   | 10.7549 | 3.0234  | C |
| 804 | H804 | 4.7236   | 9.9894  | 3.8419  | H |
| 805 | H805 | 5.7371   | 10.5859 | 2.4716  | H |
| 806 | C806 | 4.7700   | 12.1436 | 3.6252  | C |
| 807 | H807 | 3.8234   | 12.2955 | 4.2104  | H |
| 808 | H808 | 4.7769   | 12.9093 | 2.8051  | H |
| 809 | C809 | 5.9656   | 12.3583 | 4.5280  | C |
| 810 | H810 | 5.9797   | 11.5721 | 5.3283  | H |
| 811 | H811 | 6.9120   | 12.2425 | 3.9347  | H |
| 812 | C812 | 5.9303   | 13.7307 | 5.1651  | C |
| 813 | H813 | 5.8865   | 14.5163 | 4.3652  | H |
| 814 | H814 | 4.9964   | 13.8341 | 5.7805  | H |
| 815 | C815 | 7.1436   | 13.9648 | 6.0391  | C |
| 816 | H816 | 7.2107   | 13.1566 | 6.8145  | H |
| 817 | H817 | 8.0754   | 13.9021 | 5.4154  | H |
| 818 | C818 | 7.0766   | 15.3153 | 6.7187  | C |
| 819 | H819 | 6.9910   | 16.1230 | 5.9448  | H |
| 820 | H820 | 6.1530   | 15.3695 | 7.3556  | H |
| 821 | C821 | 8.2989   | 15.5640 | 7.5767  | C |
| 822 | H822 | 9.2189   | 15.5448 | 6.9325  | H |
| 823 | H823 | 8.4043   | 14.7354 | 8.3260  | H |
| 824 | C824 | 8.2087   | 16.8862 | 8.2939  | C |
| 825 | H825 | 7.3065   | 16.9155 | 8.9528  | H |
| 826 | H826 | 9.1141   | 17.0478 | 8.9271  | H |
| 827 | H827 | 8.1345   | 17.7273 | 7.5628  | H |
| 828 | N828 | -8.2421  | 1.2432  | -8.1878 | N |
| 829 | H829 | -8.6841  | 2.1400  | -8.1308 | H |
| 830 | C830 | -9.1102  | 0.0946  | -8.2261 | C |
| 831 | H831 | -8.4821  | -0.8358 | -8.3300 | H |
| 832 | H832 | -9.7515  | 0.1967  | -9.1491 | H |
| 833 | C833 | -10.0229 | -0.0469 | -7.0066 | C |
| 834 | H834 | -10.5641 | 0.9204  | -6.8211 | H |
| 835 | H835 | -9.4091  | -0.2718 | -6.0957 | H |
| 836 | C836 | -11.0253 | -1.1558 | -7.2381 | C |
| 837 | H837 | -10.4981 | -2.0956 | -7.5572 | H |
| 838 | H838 | -11.7158 | -0.8700 | -8.0767 | H |
| 839 | C839 | -11.8261 | -1.4276 | -5.9830 | C |
| 840 | H840 | -12.2637 | -0.4688 | -5.5991 | H |
| 841 | H841 | -11.1661 | -1.8461 | -5.1771 | H |
| 842 | C842 | -12.9700 | -2.4148 | -6.2738 | C |
| 843 | H843 | -13.5532 | -2.0314 | -7.1716 | H |
| 844 | C844 | -12.3397 | -3.7458 | -6.6922 | C |



|     |      |          |         |         |   |
|-----|------|----------|---------|---------|---|
| 845 | O845 | -11.7699 | -4.5982 | -6.0105 | O |
| 846 | O846 | -12.4446 | -3.9484 | -8.0402 | O |
| 847 | C847 | -11.9087 | -5.1617 | -8.5860 | C |
| 848 | H848 | -12.4502 | -5.2509 | -9.5666 | H |
| 849 | H849 | -12.1692 | -6.0251 | -7.9198 | H |
| 850 | C850 | -10.4164 | -5.0599 | -8.7855 | C |
| 851 | H851 | -9.8842  | -5.1550 | -7.8058 | H |
| 852 | H852 | -10.0729 | -5.8818 | -9.4578 | H |
| 853 | H853 | -10.1473 | -4.0787 | -9.2450 | H |
| 854 | N854 | -13.9213 | -2.5784 | -5.2114 | N |
| 855 | H855 | -14.8662 | -2.3303 | -5.4349 | H |
| 856 | C856 | -13.5949 | -2.8650 | -3.9012 | C |
| 857 | O857 | -12.4142 | -3.0798 | -3.5472 | O |
| 858 | C858 | -14.7466 | -2.9561 | -2.9150 | C |
| 859 | H859 | -15.6237 | -2.3393 | -3.2545 | H |
| 860 | H860 | -15.0716 | -4.0303 | -2.8861 | H |
| 861 | C861 | -14.3139 | -2.5052 | -1.5366 | C |
| 862 | H862 | -13.3850 | -3.0587 | -1.2322 | H |
| 863 | H863 | -14.0526 | -1.4147 | -1.5648 | H |
| 864 | C864 | -15.4140 | -2.7435 | -0.5246 | C |
| 865 | H865 | -16.3605 | -2.2482 | -0.8716 | H |
| 866 | H866 | -15.6246 | -3.8429 | -0.4490 | H |
| 867 | C867 | -15.0310 | -2.2038 | 0.8366  | C |
| 868 | H868 | -14.8732 | -1.0949 | 0.7700  | H |
| 869 | H869 | -14.0561 | -2.6568 | 1.1612  | H |
| 870 | C870 | -16.0983 | -2.5054 | 1.8665  | C |
| 871 | H871 | -17.0866 | -2.1047 | 1.5144  | H |
| 872 | H872 | -16.2127 | -3.6162 | 1.9752  | H |
| 873 | C873 | -15.7543 | -1.8954 | 3.2082  | C |
| 874 | H874 | -14.7418 | -2.2536 | 3.5364  | H |
| 875 | H875 | -15.6929 | -0.7795 | 3.1089  | H |
| 876 | C876 | -16.7838 | -2.2570 | 4.2571  | C |
| 877 | H877 | -17.8044 | -1.9456 | 3.9073  | H |
| 878 | H878 | -16.8071 | -3.3705 | 4.3927  | H |
| 879 | C879 | -16.4766 | -1.5895 | 5.5803  | C |
| 880 | H880 | -16.5029 | -0.4750 | 5.4539  | H |
| 881 | H881 | -15.4364 | -1.8601 | 5.9061  | H |
| 882 | C882 | -17.4655 | -2.0037 | 6.6485  | C |
| 883 | H883 | -18.5098 | -1.7730 | 6.3060  | H |
| 884 | H884 | -17.4073 | -3.1132 | 6.8047  | H |
| 885 | C885 | -17.1917 | -1.2911 | 7.9553  | C |
| 886 | H886 | -16.1321 | -1.4832 | 8.2745  | H |
| 887 | H887 | -17.2957 | -0.1837 | 7.8084  | H |
| 888 | C888 | -18.1391 | -1.7509 | 9.0424  | C |
| 889 | H889 | -19.2001 | -1.5890 | 8.7120  | H |
| 890 | H890 | -18.0109 | -2.8527 | 9.2111  | H |
| 891 | C891 | -17.8911 | -1.0062 | 10.3363 | C |
| 892 | H892 | -18.0606 | 0.0914  | 10.1770 | H |
| 893 | H893 | -16.8184 | -1.1324 | 10.6446 | H |
| 894 | C894 | -18.7968 | -1.5036 | 11.4428 | C |
| 895 | H895 | -19.8695 | -1.3886 | 11.1302 | H |
| 896 | H896 | -18.6180 | -2.5992 | 11.6071 | H |
| 897 | C897 | -18.5579 | -0.7535 | 12.7277 | C |
| 898 | H898 | -17.4925 | -0.8545 | 13.0498 | H |
| 899 | H899 | -18.7813 | 0.3330  | 12.5975 | H |
| 900 | H900 | -19.2122 | -1.1535 | 13.5393 | H |
| 901 | C901 | -10.4423 | 5.5654  | -7.1795 | C |

|     |      |          |         |         |   |
|-----|------|----------|---------|---------|---|
| 902 | O902 | -11.1198 | 6.5623  | -6.8419 | O |
| 903 | C903 | -11.1462 | 4.2888  | -7.6895 | C |
| 904 | O904 | -10.5307 | 3.2016  | -7.7530 | O |
| 905 | N905 | -9.0806  | 5.5381  | -7.1585 | N |
| 906 | H906 | -8.6108  | 4.6758  | -7.3490 | H |
| 907 | C907 | -8.2862  | 6.6243  | -6.6426 | C |
| 908 | H908 | -8.9701  | 7.4486  | -6.2888 | H |
| 909 | H909 | -7.6663  | 7.0251  | -7.4973 | H |
| 910 | C910 | -7.3480  | 6.2207  | -5.5031 | C |
| 911 | H911 | -6.7813  | 5.2901  | -5.7785 | H |
| 912 | H912 | -7.9449  | 5.9933  | -4.5819 | H |
| 913 | C913 | -6.3732  | 7.3442  | -5.2226 | C |
| 914 | H914 | -6.9299  | 8.3149  | -5.1095 | H |
| 915 | H915 | -5.6786  | 7.4656  | -6.0960 | H |
| 916 | C916 | -5.5759  | 7.0737  | -3.9644 | C |
| 917 | H917 | -5.0691  | 6.0766  | -4.0399 | H |
| 918 | H918 | -6.2574  | 7.0471  | -3.0715 | H |
| 919 | C919 | -4.5044  | 8.1593  | -3.7572 | C |
| 920 | H920 | -3.8456  | 8.1956  | -4.6826 | H |
| 921 | C921 | -5.2319  | 9.5054  | -3.6674 | C |
| 922 | O922 | -5.9677  | 9.9421  | -2.7819 | O |
| 923 | O923 | -5.0046  | 10.2797 | -4.7706 | O |
| 924 | C924 | -5.6250  | 11.5713 | -4.8279 | C |
| 925 | H925 | -5.0136  | 12.1041 | -5.6055 | H |
| 926 | H926 | -5.5229  | 12.0842 | -3.8360 | H |
| 927 | C927 | -7.0737  | 11.4668 | -5.2375 | C |
| 928 | H928 | -7.4569  | 12.4775 | -5.5152 | H |
| 929 | H929 | -7.1864  | 10.7828 | -6.1124 | H |
| 930 | H930 | -7.6908  | 11.0715 | -4.3911 | H |
| 931 | N931 | -3.6273  | 7.9656  | -2.6363 | N |
| 932 | H932 | -2.6594  | 7.8313  | -2.8575 | H |
| 933 | C933 | -4.0493  | 7.7364  | -1.3415 | C |
| 934 | O934 | -5.2583  | 7.6169  | -1.0462 | O |
| 935 | C935 | -2.9835  | 7.6841  | -0.2586 | C |
| 936 | H936 | -3.3546  | 6.9920  | 0.5430  | H |
| 937 | H937 | -2.0171  | 7.2700  | -0.6533 | H |
| 938 | C938 | -2.7779  | 9.0732  | 0.3106  | C |
| 939 | H939 | -2.4036  | 9.7595  | -0.4938 | H |
| 940 | H940 | -3.7651  | 9.4770  | 0.6648  | H |
| 941 | C941 | -1.7954  | 9.0568  | 1.4624  | C |
| 942 | H942 | -2.1435  | 8.3302  | 2.2442  | H |
| 943 | H943 | -0.7932  | 8.7040  | 1.0999  | H |
| 944 | C944 | -1.6615  | 10.4336 | 2.0791  | C |
| 945 | H945 | -1.3630  | 11.1726 | 1.2895  | H |
| 946 | H946 | -2.6588  | 10.7604 | 2.4789  | H |
| 947 | C947 | -0.6402  | 10.4451 | 3.1966  | C |
| 948 | H948 | -0.9095  | 9.6674  | 3.9609  | H |
| 949 | H949 | 0.3694   | 10.1750 | 2.7864  | H |
| 950 | C950 | -0.5735  | 11.8021 | 3.8653  | C |
| 951 | H951 | -0.4282  | 12.5993 | 3.0893  | H |
| 952 | H952 | -1.5505  | 12.0124 | 4.3771  | H |
| 953 | C953 | 0.5534   | 11.8683 | 4.8744  | C |
| 954 | H954 | 0.4550   | 11.0233 | 5.6076  | H |
| 955 | H955 | 1.5366   | 11.7382 | 4.3479  | H |
| 956 | C956 | 0.5448   | 13.1850 | 5.6220  | C |
| 957 | H957 | -0.3836  | 13.2490 | 6.2499  | H |
| 958 | H958 | 0.5101   | 14.0350 | 4.8906  | H |

|      |       |          |         |          |   |
|------|-------|----------|---------|----------|---|
| 959  | C959  | 1.7656   | 13.3283 | 6.5057   | C |
| 960  | H960  | 1.8221   | 12.4599 | 7.2153   | H |
| 961  | H961  | 2.6937   | 13.2996 | 5.8742   | H |
| 962  | C962  | 1.7269   | 14.6213 | 7.2920   | C |
| 963  | H963  | 1.6472   | 15.4897 | 6.5863   | H |
| 964  | H964  | 0.8116   | 14.6371 | 7.9411   | H |
| 965  | C965  | 2.9613   | 14.7790 | 8.1537   | C |
| 966  | H966  | 3.0460   | 13.9051 | 8.8541   | H |
| 967  | H967  | 3.8780   | 14.7718 | 7.5053   | H |
| 968  | C968  | 2.9157   | 16.0636 | 8.9527   | C |
| 969  | H969  | 2.8596   | 16.9400 | 8.2547   | H |
| 970  | H970  | 1.9870   | 16.0828 | 9.5820   | H |
| 971  | C971  | 4.1328   | 16.2001 | 9.8430   | C |
| 972  | H972  | 5.0615   | 16.1921 | 9.2112   | H |
| 973  | H973  | 4.1934   | 15.3134 | 10.5292  | H |
| 974  | C974  | 4.0847   | 17.4678 | 10.6559  | C |
| 975  | H975  | 3.1833   | 17.4796 | 11.3154  | H |
| 976  | H976  | 4.9936   | 17.5513 | 11.2993  | H |
| 977  | H977  | 4.0412   | 18.3626 | 9.9889   | H |
| 978  | N978  | -12.4411 | 4.4392  | -8.1045  | N |
| 979  | H979  | -12.9163 | 5.2904  | -7.8760  | H |
| 980  | C980  | -13.2611 | 3.3165  | -8.4778  | C |
| 981  | H981  | -12.5928 | 2.4645  | -8.7918  | H |
| 982  | H982  | -13.8746 | 3.6362  | -9.3692  | H |
| 983  | C983  | -14.2078 | 2.8331  | -7.3775  | C |
| 984  | H984  | -14.8025 | 3.6996  | -6.9801  | H |
| 985  | H985  | -13.6150 | 2.4097  | -6.5252  | H |
| 986  | C986  | -15.1453 | 1.7794  | -7.9249  | C |
| 987  | H987  | -14.5632 | 0.9741  | -8.4493  | H |
| 988  | H988  | -15.8241 | 2.2415  | -8.6912  | H |
| 989  | C989  | -15.9667 | 1.1660  | -6.8118  | C |
| 990  | H990  | -16.4634 | 1.9796  | -6.2202  | H |
| 991  | H991  | -15.3085 | 0.5903  | -6.1077  | H |
| 992  | C992  | -17.0496 | 0.2317  | -7.3795  | C |
| 993  | H993  | -17.6037 | 0.7849  | -8.2043  | H |
| 994  | C994  | -16.3460 | -0.9561 | -8.0404  | C |
| 995  | O995  | -15.8043 | -1.9357 | -7.5281  | O |
| 996  | O996  | -16.3456 | -0.8440 | -9.4025  | O |
| 997  | C997  | -15.7230 | -1.8846 | -10.1690 | C |
| 998  | H998  | -16.2091 | -1.7728 | -11.1761 | H |
| 999  | H999  | -15.9723 | -2.8846 | -9.7276  | H |
| 1000 | C1000 | -14.2300 | -1.6819 | -10.2509 | C |
| 1001 | H1001 | -13.8129 | -2.3113 | -11.0729 | H |
| 1002 | H1002 | -13.9891 | -0.6112 | -10.4558 | H |
| 1003 | H1003 | -13.7411 | -1.9816 | -9.2903  | H |
| 1004 | N1004 | -18.0418 | -0.1922 | -6.4301  | N |
| 1005 | H1005 | -18.9792 | 0.0939  | -6.6296  | H |
| 1006 | C1006 | -17.7569 | -0.7477 | -5.1977  | C |
| 1007 | O1007 | -16.5850 | -1.0097 | -4.8489  | O |
| 1008 | C1008 | -18.9365 | -1.0751 | -4.2978  | C |
| 1009 | H1009 | -19.8439 | -0.4707 | -4.5702  | H |
| 1010 | H1010 | -19.1822 | -2.1587 | -4.4581  | H |
| 1011 | C1011 | -18.5838 | -0.8296 | -2.8462  | C |
| 1012 | H1012 | -17.6421 | -1.3858 | -2.5890  | H |
| 1013 | H1013 | -18.3743 | 0.2615  | -2.6918  | H |
| 1014 | C1014 | -19.7098 | -1.2685 | -1.9347  | C |
| 1015 | H1015 | -20.6616 | -0.7513 | -2.2314  | H |

|      |       |          |         |         |   |
|------|-------|----------|---------|---------|---|
| 1016 | H1016 | -19.8819 | -2.3709 | -2.0516 | H |
| 1017 | C1017 | -19.3932 | -0.9528 | -0.4886 | C |
| 1018 | H1018 | -19.2669 | 0.1553  | -0.3652 | H |
| 1019 | H1019 | -18.4168 | -1.4296 | -0.2045 | H |
| 1020 | C1020 | -20.4855 | -1.4463 | 0.4359  | C |
| 1021 | H1021 | -21.4722 | -1.0109 | 0.1229  | H |
| 1022 | H1022 | -20.5750 | -2.5613 | 0.3505  | H |
| 1023 | C1023 | -20.1982 | -1.0669 | 1.8727  | C |
| 1024 | H1024 | -19.1857 | -1.4529 | 2.1685  | H |
| 1025 | H1025 | -20.1649 | 0.0506  | 1.9666  | H |
| 1026 | C1026 | -21.2461 | -1.6252 | 2.8112  | C |
| 1027 | H1027 | -22.2649 | -1.2788 | 2.4901  | H |
| 1028 | H1028 | -21.2449 | -2.7456 | 2.7521  | H |
| 1029 | C1029 | -20.9897 | -1.1906 | 4.2382  | C |
| 1030 | H1030 | -21.0484 | -0.0723 | 4.3066  | H |
| 1031 | H1031 | -19.9489 | -1.4852 | 4.5404  | H |
| 1032 | C1032 | -21.9877 | -1.8116 | 5.1916  | C |
| 1033 | H1033 | -23.0313 | -1.5528 | 4.8675  | H |
| 1034 | H1034 | -21.8983 | -2.9293 | 5.1536  | H |
| 1035 | C1035 | -21.7628 | -1.3312 | 6.6092  | C |
| 1036 | H1036 | -20.7025 | -1.5408 | 6.9146  | H |
| 1037 | H1037 | -21.9055 | -0.2194 | 6.6562  | H |
| 1038 | C1038 | -22.7105 | -2.0069 | 7.5767  | C |
| 1039 | H1039 | -23.7710 | -1.8270 | 7.2542  | H |
| 1040 | H1040 | -22.5427 | -3.1161 | 7.5539  | H |
| 1041 | C1041 | -22.5135 | -1.4919 | 8.9861  | C |
| 1042 | H1042 | -22.7254 | -0.3906 | 9.0170  | H |
| 1043 | H1043 | -21.4417 | -1.6299 | 9.2922  | H |
| 1044 | C1044 | -23.4154 | -2.2094 | 9.9677  | C |
| 1045 | H1045 | -24.4866 | -2.0839 | 9.6541  | H |
| 1046 | H1046 | -23.1929 | -3.3091 | 9.9439  | H |
| 1047 | C1047 | -23.2305 | -1.6859 | 11.3685 | C |
| 1048 | H1048 | -22.1676 | -1.8008 | 11.6943 | H |
| 1049 | H1049 | -23.4968 | -0.6025 | 11.4231 | H |
| 1050 | H1050 | -23.8817 | -2.2456 | 12.0823 | H |
| 1051 | C1051 | -14.8379 | 8.2494  | -6.0919 | C |
| 1052 | O1052 | -15.5424 | 8.9690  | -5.3539 | O |
| 1053 | C1053 | -15.5116 | 7.1740  | -6.9738 | C |
| 1054 | O1054 | -14.8764 | 6.1810  | -7.3867 | O |
| 1055 | N1055 | -13.4853 | 8.3783  | -6.2360 | N |
| 1056 | H1056 | -12.9927 | 7.6550  | -6.7222 | H |
| 1057 | C1057 | -12.6969 | 9.2148  | -5.3640 | C |
| 1058 | H1058 | -13.3686 | 9.9824  | -4.8848 | H |
| 1059 | H1059 | -11.9502 | 9.7520  | -6.0180 | H |
| 1060 | C1060 | -11.9422 | 8.4500  | -4.2757 | C |
| 1061 | H1061 | -11.4637 | 7.5308  | -4.7113 | H |
| 1062 | H1062 | -12.6594 | 8.1155  | -3.4817 | H |
| 1063 | C1063 | -10.8696 | 9.3259  | -3.6657 | C |
| 1064 | H1064 | -11.3009 | 10.3172 | -3.3601 | H |
| 1065 | H1065 | -10.0776 | 9.5401  | -4.4323 | H |
| 1066 | C1066 | -10.2564 | 8.6463  | -2.4601 | C |
| 1067 | H1067 | -10.0246 | 7.5757  | -2.7039 | H |
| 1068 | H1068 | -10.9841 | 8.6392  | -1.6050 | H |
| 1069 | C1069 | -8.9552  | 9.3428  | -2.0285 | C |
| 1070 | H1070 | -8.3037  | 9.4966  | -2.9484 | H |
| 1071 | C1071 | -9.3097  | 10.7452 | -1.5222 | C |
| 1072 | O1072 | -9.5287  | 11.1448 | -0.3803 | O |

|      |       |          |         |         |   |
|------|-------|----------|---------|---------|---|
| 1073 | O1073 | -9.3592  | 11.6528 | -2.5503 | O |
| 1074 | C1074 | -9.7234  | 13.0015 | -2.2343 | C |
| 1075 | H1075 | -9.3218  | 13.5827 | -3.1076 | H |
| 1076 | H1076 | -9.2141  | 13.3235 | -1.2885 | H |
| 1077 | C1077 | -11.2220 | 13.1400 | -2.1173 | C |
| 1078 | H1078 | -11.4912 | 14.2142 | -1.9821 | H |
| 1079 | H1079 | -11.7252 | 12.7513 | -3.0349 | H |
| 1080 | H1080 | -11.5912 | 12.5584 | -1.2374 | H |
| 1081 | N1081 | -8.1595  | 8.6075  | -1.0888 | N |
| 1082 | H1082 | -7.1701  | 8.7521  | -1.1512 | H |
| 1083 | C1083 | -8.6551  | 7.9018  | -0.0073 | C |
| 1084 | O1084 | -9.8743  | 7.6863  | 0.1509  | O |
| 1085 | C1085 | -7.6368  | 7.3399  | 0.9706  | C |
| 1086 | H1086 | -8.1902  | 6.6833  | 1.6921  | H |
| 1087 | H1087 | -6.8915  | 6.7085  | 0.4157  | H |
| 1088 | C1088 | -6.9174  | 8.4461  | 1.7111  | C |
| 1089 | H1089 | -6.2519  | 9.0013  | 0.9956  | H |
| 1090 | H1090 | -7.6614  | 9.1773  | 2.1232  | H |
| 1091 | C1091 | -6.0754  | 7.8840  | 2.8377  | C |
| 1092 | H1092 | -6.7265  | 7.3180  | 3.5545  | H |
| 1093 | H1093 | -5.3292  | 7.1576  | 2.4191  | H |
| 1094 | C1094 | -5.3514  | 8.9915  | 3.5721  | C |
| 1095 | H1095 | -4.7337  | 9.5820  | 2.8425  | H |
| 1096 | H1096 | -6.0998  | 9.6970  | 4.0201  | H |
| 1097 | C1097 | -4.4526  | 8.4439  | 4.6601  | C |
| 1098 | H1098 | -5.0549  | 7.8249  | 5.3755  | H |
| 1099 | H1099 | -3.6814  | 7.7681  | 4.2036  | H |
| 1100 | C1100 | -3.7658  | 9.5663  | 5.4077  | C |
| 1101 | H1101 | -3.2211  | 10.2238 | 4.6762  | H |
| 1102 | H1102 | -4.5350  | 10.2037 | 5.9179  | H |
| 1103 | C1103 | -2.7825  | 9.0386  | 6.4301  | C |
| 1104 | H1104 | -3.3084  | 8.3577  | 7.1493  | H |
| 1105 | H1105 | -1.9949  | 8.4298  | 5.9115  | H |
| 1106 | C1106 | -2.1299  | 10.1764 | 7.1854  | C |
| 1107 | H1107 | -2.9065  | 10.7295 | 7.7764  | H |
| 1108 | H1108 | -1.6892  | 10.9062 | 6.4520  | H |
| 1109 | C1109 | -1.0415  | 9.6812  | 8.1129  | C |
| 1110 | H1110 | -1.4721  | 8.9573  | 8.8532  | H |
| 1111 | H1111 | -0.2668  | 9.1274  | 7.5190  | H |
| 1112 | C1112 | -0.3902  | 10.8359 | 8.8434  | C |
| 1113 | H1113 | -0.0291  | 11.5927 | 8.0944  | H |
| 1114 | H1114 | -1.1498  | 11.3483 | 9.4905  | H |
| 1115 | C1115 | 0.7727   | 10.3734 | 9.6944  | C |
| 1116 | H1116 | 0.4126   | 9.6378  | 10.4605 | H |
| 1117 | H1117 | 1.5211   | 9.8403  | 9.0502  | H |
| 1118 | C1118 | 1.4396   | 11.5445 | 10.3835 | C |
| 1119 | H1119 | 1.7462   | 12.3046 | 9.6151  | H |
| 1120 | H1120 | 0.7059   | 12.0455 | 11.0683 | H |
| 1121 | C1121 | 2.6544   | 11.1078 | 11.1738 | C |
| 1122 | H1122 | 3.3800   | 10.5930 | 10.4898 | H |
| 1123 | H1123 | 2.3463   | 10.3594 | 11.9508 | H |
| 1124 | C1124 | 3.3298   | 12.2803 | 11.8373 | C |
| 1125 | H1125 | 2.6374   | 12.7770 | 12.5594 | H |
| 1126 | H1126 | 4.2372   | 11.9429 | 12.3936 | H |
| 1127 | H1127 | 3.6423   | 13.0379 | 11.0767 | H |
| 1128 | N1128 | -16.8263 | 7.4049  | -7.2917 | N |
| 1129 | H1129 | -17.2962 | 8.1356  | -6.8021 | H |

|      |       |          |         |          |   |
|------|-------|----------|---------|----------|---|
| 1130 | C1130 | -17.6373 | 6.4491  | -7.9936  | C |
| 1131 | H1131 | -16.9622 | 5.7817  | -8.6028  | H |
| 1132 | H1132 | -18.2990 | 7.0255  | -8.7034  | H |
| 1133 | C1133 | -18.5184 | 5.5752  | -7.0973  | C |
| 1134 | H1134 | -19.1026 | 6.2121  | -6.3823  | H |
| 1135 | H1135 | -17.8739 | 4.8906  | -6.4858  | H |
| 1136 | C1136 | -19.4729 | 4.7633  | -7.9459  | C |
| 1137 | H1137 | -18.9006 | 4.1801  | -8.7181  | H |
| 1138 | H1138 | -20.1632 | 5.4527  | -8.5010  | H |
| 1139 | C1139 | -20.2770 | 3.8134  | -7.0843  | C |
| 1140 | H1140 | -20.8430 | 4.3940  | -6.3096  | H |
| 1141 | H1141 | -19.5963 | 3.1014  | -6.5447  | H |
| 1142 | C1142 | -21.2740 | 3.0136  | -7.9424  | C |
| 1143 | H1143 | -21.8465 | 3.7453  | -8.5937  | H |
| 1144 | C1144 | -20.4607 | 2.1154  | -8.8793  | C |
| 1145 | O1145 | -19.8216 | 1.0971  | -8.6147  | O |
| 1146 | O1146 | -20.4886 | 2.5715  | -10.1640 | O |
| 1147 | C1147 | -19.6843 | 1.8909  | -11.1409 | C |
| 1148 | H1148 | -20.1692 | 2.1879  | -12.1098 | H |
| 1149 | H1149 | -19.7599 | 0.7825  | -10.9903 | H |
| 1150 | C1150 | -18.2512 | 2.3568  | -11.0685 | C |
| 1151 | H1151 | -17.6730 | 1.9180  | -11.9162 | H |
| 1152 | H1152 | -18.1954 | 3.4703  | -11.1279 | H |
| 1153 | H1153 | -17.7855 | 2.0278  | -10.1065 | H |
| 1154 | N1154 | -22.2460 | 2.2681  | -7.1898  | N |
| 1155 | H1155 | -23.1878 | 2.3416  | -7.4934  | H |
| 1156 | C1156 | -21.9469 | 1.4027  | -6.1514  | C |
| 1157 | O1157 | -20.7692 | 1.1933  | -5.7977  | O |
| 1158 | C1158 | -23.1087 | 0.7191  | -5.4503  | C |
| 1159 | H1159 | -24.1021 | 1.1148  | -5.7848  | H |
| 1160 | H1160 | -23.0653 | -0.3695 | -5.7229  | H |
| 1161 | C1161 | -22.9660 | 0.8868  | -3.9517  | C |
| 1162 | H1162 | -21.9485 | 0.5265  | -3.6367  | H |
| 1163 | H1163 | -23.0281 | 1.9755  | -3.6881  | H |
| 1164 | C1164 | -24.0364 | 0.1212  | -3.2041  | C |
| 1165 | H1165 | -25.0515 | 0.4852  | -3.5126  | H |
| 1166 | H1166 | -23.9794 | -0.9675 | -3.4682  | H |
| 1167 | C1167 | -23.8631 | 0.2937  | -1.7100  | C |
| 1168 | H1168 | -23.9266 | 1.3833  | -1.4490  | H |
| 1169 | H1169 | -22.8392 | -0.0586 | -1.4104  | H |
| 1170 | C1170 | -24.9091 | -0.4742 | -0.9310  | C |
| 1171 | H1171 | -25.9339 | -0.1334 | -1.2339  | H |
| 1172 | H1172 | -24.8372 | -1.5665 | -1.1763  | H |
| 1173 | C1173 | -24.7232 | -0.2720 | 0.5577   | C |
| 1174 | H1174 | -23.6835 | -0.5811 | 0.8502   | H |
| 1175 | H1175 | -24.8241 | 0.8184  | 0.8029   | H |
| 1176 | C1176 | -25.7302 | -1.0662 | 1.3613   | C |
| 1177 | H1177 | -26.7704 | -0.7746 | 1.0595   | H |
| 1178 | H1178 | -25.6145 | -2.1592 | 1.1365   | H |
| 1179 | C1179 | -25.5445 | -0.8283 | 2.8448   | C |
| 1180 | H1180 | -25.7003 | 0.2593  | 3.0722   | H |
| 1181 | H1181 | -24.4885 | -1.0780 | 3.1356   | H |
| 1182 | C1182 | -26.5043 | -1.6605 | 3.6675   | C |
| 1183 | H1183 | -27.5598 | -1.4278 | 3.3672   | H |
| 1184 | H1184 | -26.3334 | -2.7494 | 3.4583   | H |
| 1185 | C1185 | -26.3253 | -1.3920 | 5.1466   | C |
| 1186 | H1186 | -25.2570 | -1.5821 | 5.4370   | H |

|      |       |          |         |         |   |
|------|-------|----------|---------|---------|---|
| 1187 | H1187 | -26.5372 | -0.3111 | 5.3600  | H |
| 1188 | C1188 | -27.2384 | -2.2626 | 5.9827  | C |
| 1189 | H1189 | -28.3055 | -2.0849 | 5.6857  | H |
| 1190 | H1190 | -27.0151 | -3.3436 | 5.7817  | H |
| 1191 | C1191 | -27.0670 | -1.9740 | 7.4586  | C |
| 1192 | H1192 | -27.3230 | -0.9011 | 7.6640  | H |
| 1193 | H1193 | -25.9915 | -2.1174 | 7.7490  | H |
| 1194 | C1194 | -27.9425 | -2.8744 | 8.3039  | C |
| 1195 | H1195 | -29.0169 | -2.7319 | 8.0132  | H |
| 1196 | H1196 | -27.6847 | -3.9469 | 8.0974  | H |
| 1197 | C1197 | -27.7720 | -2.5867 | 9.7733  | C |
| 1198 | H1198 | -26.7062 | -2.7232 | 10.0802 | H |
| 1199 | H1199 | -28.0703 | -1.5359 | 10.0065 | H |
| 1200 | H1200 | -28.4060 | -3.2764 | 10.3808 | H |

@<TRIPOS>BOND

1 1 2 2  
2 1 3 1  
3 1 5 Ar  
4 3 4 2  
5 3 78 Ar  
6 5 6 1  
7 5 7 1  
8 7 8 1  
9 7 9 1  
10 7 10 1  
11 10 11 1  
12 10 12 1  
13 10 13 1  
14 13 14 1  
15 13 15 1  
16 13 16 1  
17 16 17 1  
18 16 18 1  
19 16 19 1  
20 19 21 1  
21 19 31 1  
22 21 22 2  
23 21 23 1  
24 23 24 1  
25 24 25 1  
26 24 26 1  
27 24 27 1  
28 27 28 1  
29 27 29 1  
30 27 30 1  
31 31 32 1  
32 31 33 1  
33 33 34 2  
34 33 35 1  
35 35 36 1  
36 35 37 1  
37 35 38 1  
38 38 39 1  
39 38 40 1  
40 38 41 1  
41 41 42 1  
42 41 43 1

43 41 44 1  
44 44 45 1  
45 44 46 1  
46 44 47 1  
47 47 48 1  
48 47 49 1  
49 47 50 1  
50 50 51 1  
51 50 52 1  
52 50 53 1  
53 53 54 1  
54 53 55 1  
55 53 56 1  
56 56 57 1  
57 56 58 1  
58 56 59 1  
59 59 60 1  
60 59 61 1  
61 59 62 1  
62 62 63 1  
63 62 64 1  
64 62 65 1  
65 65 66 1  
66 65 67 1  
67 65 68 1  
68 68 69 1  
69 68 70 1  
70 68 71 1  
71 71 72 1  
72 71 73 1  
73 71 74 1  
74 74 75 1  
75 74 76 1  
76 74 77 1  
77 78 79 1  
78 78 80 1  
79 80 81 1  
80 80 82 1  
81 80 83 1  
82 83 84 1  
83 83 85 1  
84 83 86 1  
85 86 87 1  
86 86 88 1  
87 86 89 1  
88 89 90 1  
89 89 91 1  
90 89 92 1  
91 92 94 1  
92 92 104 1  
93 94 95 2  
94 94 96 1  
95 96 97 1  
96 97 98 1  
97 97 99 1  
98 97 100 1  
99 100 101 1



100 100 102 1  
101 100 103 1  
102 104 105 1  
103 104 106 1  
104 106 107 2  
105 106 108 1  
106 108 109 1  
107 108 110 1  
108 108 111 1  
109 111 112 1  
110 111 113 1  
111 111 114 1  
112 114 115 1  
113 114 116 1  
114 114 117 1  
115 117 118 1  
116 117 119 1  
117 117 120 1  
118 120 121 1  
119 120 122 1  
120 120 123 1  
121 123 124 1  
122 123 125 1  
123 123 126 1  
124 126 127 1  
125 126 128 1  
126 126 129 1  
127 129 130 1  
128 129 131 1  
129 129 132 1  
130 132 133 1  
131 132 134 1  
132 132 135 1  
133 135 136 1  
134 135 137 1  
135 135 138 1  
136 138 139 1  
137 138 140 1  
138 138 141 1  
139 141 142 1  
140 141 143 1  
141 141 144 1  
142 144 145 1  
143 144 146 1  
144 144 147 1  
145 147 148 1  
146 147 149 1  
147 147 150 1  
148 151 152 2  
149 151 153 1  
150 151 155 Ar  
151 153 154 2  
152 153 228 Ar  
153 155 156 1  
154 155 157 1  
155 157 158 1  
156 157 159 1

157 157 160 1  
158 160 161 1  
159 160 162 1  
160 160 163 1  
161 163 164 1  
162 163 165 1  
163 163 166 1  
164 166 167 1  
165 166 168 1  
166 166 169 1  
167 169 171 1  
168 169 181 1  
169 171 172 2  
170 171 173 1  
171 173 174 1  
172 174 175 1  
173 174 176 1  
174 174 177 1  
175 177 178 1  
176 177 179 1  
177 177 180 1  
178 181 182 1  
179 181 183 Ar  
180 183 184 2  
181 183 185 1  
182 185 186 1  
183 185 187 1  
184 185 188 1  
185 188 189 1  
186 188 190 1  
187 188 191 1  
188 191 192 1  
189 191 193 1  
190 191 194 1  
191 194 195 1  
192 194 196 1  
193 194 197 1  
194 197 198 1  
195 197 199 1  
196 197 200 1  
197 200 201 1  
198 200 202 1  
199 200 203 1  
200 203 204 1  
201 203 205 1  
202 203 206 1  
203 206 207 1  
204 206 208 1  
205 206 209 1  
206 209 210 1  
207 209 211 1  
208 209 212 1  
209 212 213 1  
210 212 214 1  
211 212 215 1  
212 215 216 1  
213 215 217 1

214 215 218 1  
215 218 219 1  
216 218 220 1  
217 218 221 1  
218 221 222 1  
219 221 223 1  
220 221 224 1  
221 224 225 1  
222 224 226 1  
223 224 227 1  
224 228 229 1  
225 228 230 1  
226 230 231 1  
227 230 232 1  
228 230 233 1  
229 233 234 1  
230 233 235 1  
231 233 236 1  
232 236 237 1  
233 236 238 1  
234 236 239 1  
235 239 240 1  
236 239 241 1  
237 239 242 1  
238 242 244 1  
239 242 254 1  
240 244 245 2  
241 244 246 1  
242 246 247 1  
243 247 248 1  
244 247 249 1  
245 247 250 1  
246 250 251 1  
247 250 252 1  
248 250 253 1  
249 254 255 1  
250 254 256 Ar  
251 256 257 2  
252 256 258 1  
253 258 259 1  
254 258 260 1  
255 258 261 1  
256 261 262 1  
257 261 263 1  
258 261 264 1  
259 264 265 1  
260 264 266 1  
261 264 267 1  
262 267 268 1  
263 267 269 1  
264 267 270 1  
265 270 271 1  
266 270 272 1  
267 270 273 1  
268 273 274 1  
269 273 275 1  
270 273 276 1

271 276 277 1  
272 276 278 1  
273 276 279 1  
274 279 280 1  
275 279 281 1  
276 279 282 1  
277 282 283 1  
278 282 284 1  
279 282 285 1  
280 285 286 1  
281 285 287 1  
282 285 288 1  
283 288 289 1  
284 288 290 1  
285 288 291 1  
286 291 292 1  
287 291 293 1  
288 291 294 1  
289 294 295 1  
290 294 296 1  
291 294 297 1  
292 297 298 1  
293 297 299 1  
294 297 300 1  
295 301 302 2  
296 301 303 1  
297 301 305 Ar  
298 303 304 2  
299 303 378 Ar  
300 305 306 1  
301 305 307 1  
302 307 308 1  
303 307 309 1  
304 307 310 1  
305 310 311 1  
306 310 312 1  
307 310 313 1  
308 313 314 1  
309 313 315 1  
310 313 316 1  
311 316 317 1  
312 316 318 1  
313 316 319 1  
314 319 321 1  
315 319 331 1  
316 321 322 2  
317 321 323 1  
318 323 324 1  
319 324 325 1  
320 324 326 1  
321 324 327 1  
322 327 328 1  
323 327 329 1  
324 327 330 1  
325 331 332 1  
326 331 333 Ar  
327 333 334 2

328 333 335 1  
329 335 336 1  
330 335 337 1  
331 335 338 1  
332 338 339 1  
333 338 340 1  
334 338 341 1  
335 341 342 1  
336 341 343 1  
337 341 344 1  
338 344 345 1  
339 344 346 1  
340 344 347 1  
341 347 348 1  
342 347 349 1  
343 347 350 1  
344 350 351 1  
345 350 352 1  
346 350 353 1  
347 353 354 1  
348 353 355 1  
349 353 356 1  
350 356 357 1  
351 356 358 1  
352 356 359 1  
353 359 360 1  
354 359 361 1  
355 359 362 1  
356 362 363 1  
357 362 364 1  
358 362 365 1  
359 365 366 1  
360 365 367 1  
361 365 368 1  
362 368 369 1  
363 368 370 1  
364 368 371 1  
365 371 372 1  
366 371 373 1  
367 371 374 1  
368 374 375 1  
369 374 376 1  
370 374 377 1  
371 378 379 1  
372 378 380 1  
373 380 381 1  
374 380 382 1  
375 380 383 1  
376 383 384 1  
377 383 385 1  
378 383 386 1  
379 386 387 1  
380 386 388 1  
381 386 389 1  
382 389 390 1  
383 389 391 1  
384 389 392 1

385 392 394 1  
386 392 404 1  
387 394 395 2  
388 394 396 1  
389 396 397 1  
390 397 398 1  
391 397 399 1  
392 397 400 1  
393 400 401 1  
394 400 402 1  
395 400 403 1  
396 404 405 1  
397 404 406 Ar  
398 406 407 2  
399 406 408 1  
400 408 409 1  
401 408 410 1  
402 408 411 1  
403 411 412 1  
404 411 413 1  
405 411 414 1  
406 414 415 1  
407 414 416 1  
408 414 417 1  
409 417 418 1  
410 417 419 1  
411 417 420 1  
412 420 421 1  
413 420 422 1  
414 420 423 1  
415 423 424 1  
416 423 425 1  
417 423 426 1  
418 426 427 1  
419 426 428 1  
420 426 429 1  
421 429 430 1  
422 429 431 1  
423 429 432 1  
424 432 433 1  
425 432 434 1  
426 432 435 1  
427 435 436 1  
428 435 437 1  
429 435 438 1  
430 438 439 1  
431 438 440 1  
432 438 441 1  
433 441 442 1  
434 441 443 1  
435 441 444 1  
436 444 445 1  
437 444 446 1  
438 444 447 1  
439 447 448 1  
440 447 449 1  
441 447 450 1

442 451 452 2  
443 451 453 1  
444 451 455 Ar  
445 453 454 2  
446 453 528 Ar  
447 455 456 1  
448 455 457 1  
449 457 458 1  
450 457 459 1  
451 457 460 1  
452 460 461 1  
453 460 462 1  
454 460 463 1  
455 463 464 1  
456 463 465 1  
457 463 466 1  
458 466 467 1  
459 466 468 1  
460 466 469 1  
461 469 471 1  
462 469 481 1  
463 471 472 2  
464 471 473 1  
465 473 474 1  
466 474 475 1  
467 474 476 1  
468 474 477 1  
469 477 478 1  
470 477 479 1  
471 477 480 1  
472 481 482 1  
473 481 483 Ar  
474 483 484 2  
475 483 485 1  
476 485 486 1  
477 485 487 1  
478 485 488 1  
479 488 489 1  
480 488 490 1  
481 488 491 1  
482 491 492 1  
483 491 493 1  
484 491 494 1  
485 494 495 1  
486 494 496 1  
487 494 497 1  
488 497 498 1  
489 497 499 1  
490 497 500 1  
491 500 501 1  
492 500 502 1  
493 500 503 1  
494 503 504 1  
495 503 505 1  
496 503 506 1  
497 506 507 1  
498 506 508 1

499 506 509 1  
500 509 510 1  
501 509 511 1  
502 509 512 1  
503 512 513 1  
504 512 514 1  
505 512 515 1  
506 515 516 1  
507 515 517 1  
508 515 518 1  
509 518 519 1  
510 518 520 1  
511 518 521 1  
512 521 522 1  
513 521 523 1  
514 521 524 1  
515 524 525 1  
516 524 526 1  
517 524 527 1  
518 528 529 1  
519 528 530 1  
520 530 531 1  
521 530 532 1  
522 530 533 1  
523 533 534 1  
524 533 535 1  
525 533 536 1  
526 536 537 1  
527 536 538 1  
528 536 539 1  
529 539 540 1  
530 539 541 1  
531 539 542 1  
532 542 544 1  
533 542 554 1  
534 544 545 2  
535 544 546 1  
536 546 547 1  
537 547 548 1  
538 547 549 1  
539 547 550 1  
540 550 551 1  
541 550 552 1  
542 550 553 1  
543 554 555 1  
544 554 556 Ar  
545 556 557 2  
546 556 558 1  
547 558 559 1  
548 558 560 1  
549 558 561 1  
550 561 562 1  
551 561 563 1  
552 561 564 1  
553 564 565 1  
554 564 566 1  
555 564 567 1



556 567 568 1  
557 567 569 1  
558 567 570 1  
559 570 571 1  
560 570 572 1  
561 570 573 1  
562 573 574 1  
563 573 575 1  
564 573 576 1  
565 576 577 1  
566 576 578 1  
567 576 579 1  
568 579 580 1  
569 579 581 1  
570 579 582 1  
571 582 583 1  
572 582 584 1  
573 582 585 1  
574 585 586 1  
575 585 587 1  
576 585 588 1  
577 588 589 1  
578 588 590 1  
579 588 591 1  
580 591 592 1  
581 591 593 1  
582 591 594 1  
583 594 595 1  
584 594 596 1  
585 594 597 1  
586 597 598 1  
587 597 599 1  
588 597 600 1  
589 601 602 2  
590 601 603 1  
591 601 605 Ar  
592 603 604 2  
593 603 678 Ar  
594 605 606 1  
595 605 607 1  
596 607 608 1  
597 607 609 1  
598 607 610 1  
599 610 611 1  
600 610 612 1  
601 610 613 1  
602 613 614 1  
603 613 615 1  
604 613 616 1  
605 616 617 1  
606 616 618 1  
607 616 619 1  
608 619 621 1  
609 619 631 1  
610 621 622 2  
611 621 623 1  
612 623 624 1

613 624 625 1  
614 624 626 1  
615 624 627 1  
616 627 628 1  
617 627 629 1  
618 627 630 1  
619 631 632 1  
620 631 633 Ar  
621 633 634 2  
622 633 635 1  
623 635 636 1  
624 635 637 1  
625 635 638 1  
626 638 639 1  
627 638 640 1  
628 638 641 1  
629 641 642 1  
630 641 643 1  
631 641 644 1  
632 644 645 1  
633 644 646 1  
634 644 647 1  
635 647 648 1  
636 647 649 1  
637 647 650 1  
638 650 651 1  
639 650 652 1  
640 650 653 1  
641 653 654 1  
642 653 655 1  
643 653 656 1  
644 656 657 1  
645 656 658 1  
646 656 659 1  
647 659 660 1  
648 659 661 1  
649 659 662 1  
650 662 663 1  
651 662 664 1  
652 662 665 1  
653 665 666 1  
654 665 667 1  
655 665 668 1  
656 668 669 1  
657 668 670 1  
658 668 671 1  
659 671 672 1  
660 671 673 1  
661 671 674 1  
662 674 675 1  
663 674 676 1  
664 674 677 1  
665 678 679 1  
666 678 680 1  
667 680 681 1  
668 680 682 1  
669 680 683 1

670 683 684 1  
671 683 685 1  
672 683 686 1  
673 686 687 1  
674 686 688 1  
675 686 689 1  
676 689 690 1  
677 689 691 1  
678 689 692 1  
679 692 694 1  
680 692 704 1  
681 694 695 2  
682 694 696 1  
683 696 697 1  
684 697 698 1  
685 697 699 1  
686 697 700 1  
687 700 701 1  
688 700 702 1  
689 700 703 1  
690 704 705 1  
691 704 706 Ar  
692 706 707 2  
693 706 708 1  
694 708 709 1  
695 708 710 1  
696 708 711 1  
697 711 712 1  
698 711 713 1  
699 711 714 1  
700 714 715 1  
701 714 716 1  
702 714 717 1  
703 717 718 1  
704 717 719 1  
705 717 720 1  
706 720 721 1  
707 720 722 1  
708 720 723 1  
709 723 724 1  
710 723 725 1  
711 723 726 1  
712 726 727 1  
713 726 728 1  
714 726 729 1  
715 729 730 1  
716 729 731 1  
717 729 732 1  
718 732 733 1  
719 732 734 1  
720 732 735 1  
721 735 736 1  
722 735 737 1  
723 735 738 1  
724 738 739 1  
725 738 740 1  
726 738 741 1

727 741 742 1  
728 741 743 1  
729 741 744 1  
730 744 745 1  
731 744 746 1  
732 744 747 1  
733 747 748 1  
734 747 749 1  
735 747 750 1  
736 751 752 2  
737 751 753 1  
738 751 755 Ar  
739 753 754 2  
740 753 828 Ar  
741 755 756 1  
742 755 757 1  
743 757 758 1  
744 757 759 1  
745 757 760 1  
746 760 761 1  
747 760 762 1  
748 760 763 1  
749 763 764 1  
750 763 765 1  
751 763 766 1  
752 766 767 1  
753 766 768 1  
754 766 769 1  
755 769 771 1  
756 769 781 1  
757 771 772 2  
758 771 773 1  
759 773 774 1  
760 774 775 1  
761 774 776 1  
762 774 777 1  
763 777 778 1  
764 777 779 1  
765 777 780 1  
766 781 782 1  
767 781 783 Ar  
768 783 784 2  
769 783 785 1  
770 785 786 1  
771 785 787 1  
772 785 788 1  
773 788 789 1  
774 788 790 1  
775 788 791 1  
776 791 792 1  
777 791 793 1  
778 791 794 1  
779 794 795 1  
780 794 796 1  
781 794 797 1  
782 797 798 1  
783 797 799 1

784 797 800 1  
785 800 801 1  
786 800 802 1  
787 800 803 1  
788 803 804 1  
789 803 805 1  
790 803 806 1  
791 806 807 1  
792 806 808 1  
793 806 809 1  
794 809 810 1  
795 809 811 1  
796 809 812 1  
797 812 813 1  
798 812 814 1  
799 812 815 1  
800 815 816 1  
801 815 817 1  
802 815 818 1  
803 818 819 1  
804 818 820 1  
805 818 821 1  
806 821 822 1  
807 821 823 1  
808 821 824 1  
809 824 825 1  
810 824 826 1  
811 824 827 1  
812 828 829 1  
813 828 830 1  
814 830 831 1  
815 830 832 1  
816 830 833 1  
817 833 834 1  
818 833 835 1  
819 833 836 1  
820 836 837 1  
821 836 838 1  
822 836 839 1  
823 839 840 1  
824 839 841 1  
825 839 842 1  
826 842 844 1  
827 842 854 1  
828 844 845 2  
829 844 846 1  
830 846 847 1  
831 847 848 1  
832 847 849 1  
833 847 850 1  
834 850 851 1  
835 850 852 1  
836 850 853 1  
837 854 855 1  
838 854 856 Ar  
839 856 857 2  
840 856 858 1

841 858 859 1  
842 858 860 1  
843 858 861 1  
844 861 862 1  
845 861 863 1  
846 861 864 1  
847 864 865 1  
848 864 866 1  
849 864 867 1  
850 867 868 1  
851 867 869 1  
852 867 870 1  
853 870 871 1  
854 870 872 1  
855 870 873 1  
856 873 874 1  
857 873 875 1  
858 873 876 1  
859 876 877 1  
860 876 878 1  
861 876 879 1  
862 879 880 1  
863 879 881 1  
864 879 882 1  
865 882 883 1  
866 882 884 1  
867 882 885 1  
868 885 886 1  
869 885 887 1  
870 885 888 1  
871 888 889 1  
872 888 890 1  
873 888 891 1  
874 891 892 1  
875 891 893 1  
876 891 894 1  
877 894 895 1  
878 894 896 1  
879 894 897 1  
880 897 898 1  
881 897 899 1  
882 897 900 1  
883 901 902 2  
884 901 903 1  
885 901 905 Ar  
886 903 904 2  
887 903 978 Ar  
888 905 906 1  
889 905 907 1  
890 907 908 1  
891 907 909 1  
892 907 910 1  
893 910 911 1  
894 910 912 1  
895 910 913 1  
896 913 914 1  
897 913 915 1

898 913 916 1  
899 916 917 1  
900 916 918 1  
901 916 919 1  
902 919 921 1  
903 919 931 1  
904 921 922 2  
905 921 923 1  
906 923 924 1  
907 924 925 1  
908 924 926 1  
909 924 927 1  
910 927 928 1  
911 927 929 1  
912 927 930 1  
913 931 932 1  
914 931 933 Ar  
915 933 934 2  
916 933 935 1  
917 935 936 1  
918 935 937 1  
919 935 938 1  
920 938 939 1  
921 938 940 1  
922 938 941 1  
923 941 942 1  
924 941 943 1  
925 941 944 1  
926 944 945 1  
927 944 946 1  
928 944 947 1  
929 947 948 1  
930 947 949 1  
931 947 950 1  
932 950 951 1  
933 950 952 1  
934 950 953 1  
935 953 954 1  
936 953 955 1  
937 953 956 1  
938 956 957 1  
939 956 958 1  
940 956 959 1  
941 959 960 1  
942 959 961 1  
943 959 962 1  
944 962 963 1  
945 962 964 1  
946 962 965 1  
947 965 966 1  
948 965 967 1  
949 965 968 1  
950 968 969 1  
951 968 970 1  
952 968 971 1  
953 971 972 1  
954 971 973 1

955 971 974 1  
956 974 975 1  
957 974 976 1  
958 974 977 1  
959 978 979 1  
960 978 980 1  
961 980 981 1  
962 980 982 1  
963 980 983 1  
964 983 984 1  
965 983 985 1  
966 983 986 1  
967 986 987 1  
968 986 988 1  
969 986 989 1  
970 989 990 1  
971 989 991 1  
972 989 992 1  
973 992 994 1  
974 992 1004 1  
975 994 995 2  
976 994 996 1  
977 996 997 1  
978 997 998 1  
979 997 999 1  
980 997 1000 1  
981 1000 1001 1  
982 1000 1002 1  
983 1000 1003 1  
984 1004 1005 1  
985 1004 1006 Ar  
986 1006 1007 2  
987 1006 1008 1  
988 1008 1009 1  
989 1008 1010 1  
990 1008 1011 1  
991 1011 1012 1  
992 1011 1013 1  
993 1011 1014 1  
994 1014 1015 1  
995 1014 1016 1  
996 1014 1017 1  
997 1017 1018 1  
998 1017 1019 1  
999 1017 1020 1  
1000 1020 1021 1  
1001 1020 1022 1  
1002 1020 1023 1  
1003 1023 1024 1  
1004 1023 1025 1  
1005 1023 1026 1  
1006 1026 1027 1  
1007 1026 1028 1  
1008 1026 1029 1  
1009 1029 1030 1  
1010 1029 1031 1  
1011 1029 1032 1



1012 1032 1033 1  
1013 1032 1034 1  
1014 1032 1035 1  
1015 1035 1036 1  
1016 1035 1037 1  
1017 1035 1038 1  
1018 1038 1039 1  
1019 1038 1040 1  
1020 1038 1041 1  
1021 1041 1042 1  
1022 1041 1043 1  
1023 1041 1044 1  
1024 1044 1045 1  
1025 1044 1046 1  
1026 1044 1047 1  
1027 1047 1048 1  
1028 1047 1049 1  
1029 1047 1050 1  
1030 1051 1052 2  
1031 1051 1053 1  
1032 1051 1055 Ar  
1033 1053 1054 2  
1034 1053 1128 Ar  
1035 1055 1056 1  
1036 1055 1057 1  
1037 1057 1058 1  
1038 1057 1059 1  
1039 1057 1060 1  
1040 1060 1061 1  
1041 1060 1062 1  
1042 1060 1063 1  
1043 1063 1064 1  
1044 1063 1065 1  
1045 1063 1066 1  
1046 1066 1067 1  
1047 1066 1068 1  
1048 1066 1069 1  
1049 1069 1071 1  
1050 1069 1081 1  
1051 1071 1072 2  
1052 1071 1073 1  
1053 1073 1074 1  
1054 1074 1075 1  
1055 1074 1076 1  
1056 1074 1077 1  
1057 1077 1078 1  
1058 1077 1079 1  
1059 1077 1080 1  
1060 1081 1082 1  
1061 1081 1083 1  
1062 1083 1084 2  
1063 1083 1085 1  
1064 1085 1086 1  
1065 1085 1087 1  
1066 1085 1088 1  
1067 1088 1089 1  
1068 1088 1090 1

1069 1088 1091 1  
1070 1091 1092 1  
1071 1091 1093 1  
1072 1091 1094 1  
1073 1094 1095 1  
1074 1094 1096 1  
1075 1094 1097 1  
1076 1097 1098 1  
1077 1097 1099 1  
1078 1097 1100 1  
1079 1100 1101 1  
1080 1100 1102 1  
1081 1100 1103 1  
1082 1103 1104 1  
1083 1103 1105 1  
1084 1103 1106 1  
1085 1106 1107 1  
1086 1106 1108 1  
1087 1106 1109 1  
1088 1109 1110 1  
1089 1109 1111 1  
1090 1109 1112 1  
1091 1112 1113 1  
1092 1112 1114 1  
1093 1112 1115 1  
1094 1115 1116 1  
1095 1115 1117 1  
1096 1115 1118 1  
1097 1118 1119 1  
1098 1118 1120 1  
1099 1118 1121 1  
1100 1121 1122 1  
1101 1121 1123 1  
1102 1121 1124 1  
1103 1124 1125 1  
1104 1124 1126 1  
1105 1124 1127 1  
1106 1128 1129 1  
1107 1128 1130 1  
1108 1130 1131 1  
1109 1130 1132 1  
1110 1130 1133 1  
1111 1133 1134 1  
1112 1133 1135 1  
1113 1133 1136 1  
1114 1136 1137 1  
1115 1136 1138 1  
1116 1136 1139 1  
1117 1139 1140 1  
1118 1139 1141 1  
1119 1139 1142 1  
1120 1142 1144 1  
1121 1142 1154 1  
1122 1144 1145 2  
1123 1144 1146 1  
1124 1146 1147 1  
1125 1147 1148 1

1126 1147 1149 1  
1127 1147 1150 1  
1128 1150 1151 1  
1129 1150 1152 1  
1130 1150 1153 1  
1131 1154 1155 1  
1132 1154 1156 1  
1133 1156 1157 2  
1134 1156 1158 1  
1135 1158 1159 1  
1136 1158 1160 1  
1137 1158 1161 1  
1138 1161 1162 1  
1139 1161 1163 1  
1140 1161 1164 1  
1141 1164 1165 1  
1142 1164 1166 1  
1143 1164 1167 1  
1144 1167 1168 1  
1145 1167 1169 1  
1146 1167 1170 1  
1147 1170 1171 1  
1148 1170 1172 1  
1149 1170 1173 1  
1150 1173 1174 1  
1151 1173 1175 1  
1152 1173 1176 1  
1153 1176 1177 1  
1154 1176 1178 1  
1155 1176 1179 1  
1156 1179 1180 1  
1157 1179 1181 1  
1158 1179 1182 1  
1159 1182 1183 1  
1160 1182 1184 1  
1161 1182 1185 1  
1162 1185 1186 1  
1163 1185 1187 1  
1164 1185 1188 1  
1165 1188 1189 1  
1166 1188 1190 1  
1167 1188 1191 1  
1168 1191 1192 1  
1169 1191 1193 1  
1170 1191 1194 1  
1171 1194 1195 1  
1172 1194 1196 1  
1173 1194 1197 1  
1174 1197 1198 1  
1175 1197 1199 1  
1176 1197 1200 1

**6. 3D STRUCTURE OF OCTAMER IN 1,2-PROPANDIOL OBTAINED FROM MD SIMULATIONS.**

|             |    |     |     |   |        |        |        |      |      |
|-------------|----|-----|-----|---|--------|--------|--------|------|------|
| HETATM<br>C | 1  | C1  | MYS | 1 | 30.788 | 11.516 | 29.465 | 1.00 | 0.00 |
| HETATM<br>O | 2  | O1  | MYS | 1 | 31.328 | 12.298 | 28.664 | 1.00 | 0.00 |
| HETATM<br>C | 3  | C2  | MYS | 1 | 29.280 | 10.975 | 29.462 | 1.00 | 0.00 |
| HETATM<br>O | 4  | O2  | MYS | 1 | 28.799 | 10.294 | 30.409 | 1.00 | 0.00 |
| HETATM<br>N | 5  | N1  | MYS | 1 | 31.444 | 11.112 | 30.565 | 1.00 | 0.00 |
| HETATM<br>H | 6  | H1  | MYS | 1 | 30.902 | 10.496 | 31.155 | 1.00 | 0.00 |
| HETATM<br>C | 7  | C3  | MYS | 1 | 32.853 | 11.397 | 30.877 | 1.00 | 0.00 |
| HETATM<br>H | 8  | H2  | MYS | 1 | 33.419 | 11.606 | 29.970 | 1.00 | 0.00 |
| HETATM<br>H | 9  | H3  | MYS | 1 | 33.229 | 10.457 | 31.282 | 1.00 | 0.00 |
| HETATM<br>C | 10 | C4  | MYS | 1 | 33.002 | 12.606 | 31.886 | 1.00 | 0.00 |
| HETATM<br>H | 11 | H4  | MYS | 1 | 32.174 | 12.399 | 32.564 | 1.00 | 0.00 |
| HETATM<br>H | 12 | H5  | MYS | 1 | 32.980 | 13.582 | 31.401 | 1.00 | 0.00 |
| HETATM<br>C | 13 | C5  | MYS | 1 | 34.330 | 12.463 | 32.617 | 1.00 | 0.00 |
| HETATM<br>H | 14 | H6  | MYS | 1 | 35.235 | 12.510 | 32.011 | 1.00 | 0.00 |
| HETATM<br>H | 15 | H7  | MYS | 1 | 34.353 | 11.455 | 33.029 | 1.00 | 0.00 |
| HETATM<br>C | 16 | C6  | MYS | 1 | 34.321 | 13.420 | 33.732 | 1.00 | 0.00 |
| HETATM<br>H | 17 | H8  | MYS | 1 | 33.533 | 13.172 | 34.443 | 1.00 | 0.00 |
| HETATM<br>H | 18 | H9  | MYS | 1 | 34.092 | 14.426 | 33.381 | 1.00 | 0.00 |
| HETATM<br>C | 19 | C7  | MYS | 1 | 35.722 | 13.415 | 34.349 | 1.00 | 0.00 |
| HETATM<br>H | 20 | H10 | MYS | 1 | 36.066 | 12.385 | 34.439 | 1.00 | 0.00 |
| HETATM<br>C | 21 | C8  | MYS | 1 | 36.886 | 14.066 | 33.579 | 1.00 | 0.00 |
| HETATM<br>O | 22 | O3  | MYS | 1 | 36.705 | 14.460 | 32.416 | 1.00 | 0.00 |
| HETATM<br>O | 23 | O4  | MYS | 1 | 38.102 | 14.107 | 34.165 | 1.00 | 0.00 |
| HETATM<br>C | 24 | C9  | MYS | 1 | 39.063 | 14.933 | 33.658 | 1.00 | 0.00 |
| HETATM<br>H | 25 | H11 | MYS | 1 | 38.840 | 15.953 | 33.971 | 1.00 | 0.00 |
| HETATM<br>H | 26 | H12 | MYS | 1 | 39.122 | 14.868 | 32.572 | 1.00 | 0.00 |
| HETATM<br>C | 27 | C10 | MYS | 1 | 40.354 | 14.413 | 34.278 | 1.00 | 0.00 |

|        |    |     |     |   |        |        |        |      |      |
|--------|----|-----|-----|---|--------|--------|--------|------|------|
| HETATM | 28 | H13 | MYS | 1 | 40.986 | 15.293 | 34.397 | 1.00 | 0.00 |
| H      |    |     |     |   |        |        |        |      |      |
| HETATM | 29 | H14 | MYS | 1 | 40.194 | 14.048 | 35.292 | 1.00 | 0.00 |
| H      |    |     |     |   |        |        |        |      |      |
| HETATM | 30 | H15 | MYS | 1 | 40.741 | 13.653 | 33.598 | 1.00 | 0.00 |
| H      |    |     |     |   |        |        |        |      |      |
| HETATM | 31 | N2  | MYS | 1 | 35.657 | 13.973 | 35.749 | 1.00 | 0.00 |
| N      |    |     |     |   |        |        |        |      |      |
| HETATM | 32 | H16 | MYS | 1 | 35.478 | 13.267 | 36.448 | 1.00 | 0.00 |
| H      |    |     |     |   |        |        |        |      |      |
| HETATM | 33 | C11 | MYS | 1 | 35.768 | 15.261 | 36.085 | 1.00 | 0.00 |
| C      |    |     |     |   |        |        |        |      |      |
| HETATM | 34 | O5  | MYS | 1 | 35.908 | 16.180 | 35.282 | 1.00 | 0.00 |
| O      |    |     |     |   |        |        |        |      |      |
| HETATM | 35 | C12 | MYS | 1 | 35.546 | 15.572 | 37.569 | 1.00 | 0.00 |
| C      |    |     |     |   |        |        |        |      |      |
| HETATM | 36 | H17 | MYS | 1 | 35.431 | 16.656 | 37.570 | 1.00 | 0.00 |
| H      |    |     |     |   |        |        |        |      |      |
| HETATM | 37 | H18 | MYS | 1 | 34.575 | 15.177 | 37.866 | 1.00 | 0.00 |
| H      |    |     |     |   |        |        |        |      |      |
| HETATM | 38 | C13 | MYS | 1 | 36.716 | 15.274 | 38.580 | 1.00 | 0.00 |
| C      |    |     |     |   |        |        |        |      |      |
| HETATM | 39 | H19 | MYS | 1 | 36.939 | 14.212 | 38.674 | 1.00 | 0.00 |
| H      |    |     |     |   |        |        |        |      |      |
| HETATM | 40 | H20 | MYS | 1 | 37.679 | 15.627 | 38.212 | 1.00 | 0.00 |
| H      |    |     |     |   |        |        |        |      |      |
| HETATM | 41 | C14 | MYS | 1 | 36.454 | 15.892 | 39.958 | 1.00 | 0.00 |
| C      |    |     |     |   |        |        |        |      |      |
| HETATM | 42 | H21 | MYS | 1 | 36.039 | 16.886 | 39.789 | 1.00 | 0.00 |
| H      |    |     |     |   |        |        |        |      |      |
| HETATM | 43 | H22 | MYS | 1 | 35.786 | 15.270 | 40.553 | 1.00 | 0.00 |
| H      |    |     |     |   |        |        |        |      |      |
| HETATM | 44 | C15 | MYS | 1 | 37.745 | 15.824 | 40.746 | 1.00 | 0.00 |
| C      |    |     |     |   |        |        |        |      |      |
| HETATM | 45 | H23 | MYS | 1 | 38.097 | 14.805 | 40.910 | 1.00 | 0.00 |
| H      |    |     |     |   |        |        |        |      |      |
| HETATM | 46 | H24 | MYS | 1 | 38.532 | 16.365 | 40.222 | 1.00 | 0.00 |
| H      |    |     |     |   |        |        |        |      |      |
| HETATM | 47 | C16 | MYS | 1 | 37.636 | 16.493 | 42.100 | 1.00 | 0.00 |
| C      |    |     |     |   |        |        |        |      |      |
| HETATM | 48 | H25 | MYS | 1 | 37.539 | 17.562 | 41.909 | 1.00 | 0.00 |
| H      |    |     |     |   |        |        |        |      |      |
| HETATM | 49 | H26 | MYS | 1 | 36.909 | 15.920 | 42.676 | 1.00 | 0.00 |
| H      |    |     |     |   |        |        |        |      |      |
| HETATM | 50 | C17 | MYS | 1 | 38.870 | 16.296 | 42.953 | 1.00 | 0.00 |
| C      |    |     |     |   |        |        |        |      |      |
| HETATM | 51 | H27 | MYS | 1 | 39.133 | 15.239 | 43.005 | 1.00 | 0.00 |
| H      |    |     |     |   |        |        |        |      |      |
| HETATM | 52 | H28 | MYS | 1 | 39.670 | 16.760 | 42.376 | 1.00 | 0.00 |
| H      |    |     |     |   |        |        |        |      |      |
| HETATM | 53 | C18 | MYS | 1 | 39.006 | 16.977 | 44.294 | 1.00 | 0.00 |
| C      |    |     |     |   |        |        |        |      |      |
| HETATM | 54 | H29 | MYS | 1 | 39.395 | 17.983 | 44.138 | 1.00 | 0.00 |
| H      |    |     |     |   |        |        |        |      |      |
| HETATM | 55 | H30 | MYS | 1 | 38.024 | 16.971 | 44.766 | 1.00 | 0.00 |
| H      |    |     |     |   |        |        |        |      |      |

|        |    |     |     |   |        |        |        |      |      |
|--------|----|-----|-----|---|--------|--------|--------|------|------|
| HETATM | 56 | C19 | MYS | 1 | 40.023 | 16.301 | 45.214 | 1.00 | 0.00 |
| C      |    |     |     |   |        |        |        |      |      |
| HETATM | 57 | H31 | MYS | 1 | 40.994 | 16.349 | 44.720 | 1.00 | 0.00 |
| H      |    |     |     |   |        |        |        |      |      |
| HETATM | 58 | H32 | MYS | 1 | 39.824 | 15.234 | 45.307 | 1.00 | 0.00 |
| H      |    |     |     |   |        |        |        |      |      |
| HETATM | 59 | C20 | MYS | 1 | 40.068 | 16.982 | 46.565 | 1.00 | 0.00 |
| C      |    |     |     |   |        |        |        |      |      |
| HETATM | 60 | H33 | MYS | 1 | 39.848 | 18.047 | 46.488 | 1.00 | 0.00 |
| H      |    |     |     |   |        |        |        |      |      |
| HETATM | 61 | H34 | MYS | 1 | 39.201 | 16.697 | 47.160 | 1.00 | 0.00 |
| H      |    |     |     |   |        |        |        |      |      |
| HETATM | 62 | C21 | MYS | 1 | 41.294 | 16.677 | 47.427 | 1.00 | 0.00 |
| C      |    |     |     |   |        |        |        |      |      |
| HETATM | 63 | H35 | MYS | 1 | 41.222 | 15.611 | 47.644 | 1.00 | 0.00 |
| H      |    |     |     |   |        |        |        |      |      |
| HETATM | 64 | H36 | MYS | 1 | 42.216 | 16.853 | 46.873 | 1.00 | 0.00 |
| H      |    |     |     |   |        |        |        |      |      |
| HETATM | 65 | C22 | MYS | 1 | 41.167 | 17.384 | 48.798 | 1.00 | 0.00 |
| C      |    |     |     |   |        |        |        |      |      |
| HETATM | 66 | H37 | MYS | 1 | 41.401 | 18.415 | 48.534 | 1.00 | 0.00 |
| H      |    |     |     |   |        |        |        |      |      |
| HETATM | 67 | H38 | MYS | 1 | 40.171 | 17.402 | 49.241 | 1.00 | 0.00 |
| H      |    |     |     |   |        |        |        |      |      |
| HETATM | 68 | C23 | MYS | 1 | 42.221 | 16.771 | 49.760 | 1.00 | 0.00 |
| C      |    |     |     |   |        |        |        |      |      |
| HETATM | 69 | H39 | MYS | 1 | 41.958 | 15.726 | 49.923 | 1.00 | 0.00 |
| H      |    |     |     |   |        |        |        |      |      |
| HETATM | 70 | H40 | MYS | 1 | 43.233 | 16.820 | 49.357 | 1.00 | 0.00 |
| H      |    |     |     |   |        |        |        |      |      |
| HETATM | 71 | C24 | MYS | 1 | 42.216 | 17.499 | 51.135 | 1.00 | 0.00 |
| C      |    |     |     |   |        |        |        |      |      |
| HETATM | 72 | H41 | MYS | 1 | 41.198 | 17.411 | 51.515 | 1.00 | 0.00 |
| H      |    |     |     |   |        |        |        |      |      |
| HETATM | 73 | H42 | MYS | 1 | 42.356 | 18.576 | 51.039 | 1.00 | 0.00 |
| H      |    |     |     |   |        |        |        |      |      |
| HETATM | 74 | C25 | MYS | 1 | 43.084 | 16.929 | 52.269 | 1.00 | 0.00 |
| C      |    |     |     |   |        |        |        |      |      |
| HETATM | 75 | H43 | MYS | 1 | 43.158 | 17.607 | 53.119 | 1.00 | 0.00 |
| H      |    |     |     |   |        |        |        |      |      |
| HETATM | 76 | H44 | MYS | 1 | 42.692 | 15.942 | 52.515 | 1.00 | 0.00 |
| H      |    |     |     |   |        |        |        |      |      |
| HETATM | 77 | H45 | MYS | 1 | 43.939 | 16.594 | 51.682 | 1.00 | 0.00 |
| H      |    |     |     |   |        |        |        |      |      |
| HETATM | 78 | N3  | MYS | 1 | 28.501 | 11.297 | 28.427 | 1.00 | 0.00 |
| N      |    |     |     |   |        |        |        |      |      |
| HETATM | 79 | H46 | MYS | 1 | 28.891 | 11.929 | 27.743 | 1.00 | 0.00 |
| H      |    |     |     |   |        |        |        |      |      |
| HETATM | 80 | C26 | MYS | 1 | 27.276 | 10.631 | 28.050 | 1.00 | 0.00 |
| C      |    |     |     |   |        |        |        |      |      |
| HETATM | 81 | H47 | MYS | 1 | 26.700 | 10.534 | 28.970 | 1.00 | 0.00 |
| H      |    |     |     |   |        |        |        |      |      |
| HETATM | 82 | H48 | MYS | 1 | 27.401 | 9.612  | 27.685 | 1.00 | 0.00 |
| H      |    |     |     |   |        |        |        |      |      |
| HETATM | 83 | C27 | MYS | 1 | 26.305 | 11.485 | 27.162 | 1.00 | 0.00 |
| C      |    |     |     |   |        |        |        |      |      |

|        |     |     |     |   |        |        |        |      |      |
|--------|-----|-----|-----|---|--------|--------|--------|------|------|
| HETATM | 84  | H49 | MYS | 1 | 26.702 | 11.417 | 26.148 | 1.00 | 0.00 |
| H      |     |     |     |   |        |        |        |      |      |
| HETATM | 85  | H50 | MYS | 1 | 26.379 | 12.534 | 27.447 | 1.00 | 0.00 |
| H      |     |     |     |   |        |        |        |      |      |
| HETATM | 86  | C28 | MYS | 1 | 24.921 | 10.932 | 27.265 | 1.00 | 0.00 |
| C      |     |     |     |   |        |        |        |      |      |
| HETATM | 87  | H51 | MYS | 1 | 24.987 | 9.872  | 27.509 | 1.00 | 0.00 |
| H      |     |     |     |   |        |        |        |      |      |
| HETATM | 88  | H52 | MYS | 1 | 24.437 | 10.968 | 26.289 | 1.00 | 0.00 |
| H      |     |     |     |   |        |        |        |      |      |
| HETATM | 89  | C29 | MYS | 1 | 24.091 | 11.667 | 28.300 | 1.00 | 0.00 |
| C      |     |     |     |   |        |        |        |      |      |
| HETATM | 90  | H53 | MYS | 1 | 23.897 | 12.688 | 27.972 | 1.00 | 0.00 |
| H      |     |     |     |   |        |        |        |      |      |
| HETATM | 91  | H54 | MYS | 1 | 24.525 | 11.678 | 29.300 | 1.00 | 0.00 |
| H      |     |     |     |   |        |        |        |      |      |
| HETATM | 92  | C30 | MYS | 1 | 22.654 | 11.077 | 28.243 | 1.00 | 0.00 |
| C      |     |     |     |   |        |        |        |      |      |
| HETATM | 93  | H55 | MYS | 1 | 22.402 | 10.843 | 27.209 | 1.00 | 0.00 |
| H      |     |     |     |   |        |        |        |      |      |
| HETATM | 94  | C31 | MYS | 1 | 22.502 | 9.664  | 28.963 | 1.00 | 0.00 |
| C      |     |     |     |   |        |        |        |      |      |
| HETATM | 95  | O6  | MYS | 1 | 22.624 | 9.502  | 30.212 | 1.00 | 0.00 |
| O      |     |     |     |   |        |        |        |      |      |
| HETATM | 96  | O7  | MYS | 1 | 22.131 | 8.722  | 28.028 | 1.00 | 0.00 |
| O      |     |     |     |   |        |        |        |      |      |
| HETATM | 97  | C32 | MYS | 1 | 22.120 | 7.362  | 28.393 | 1.00 | 0.00 |
| C      |     |     |     |   |        |        |        |      |      |
| HETATM | 98  | H56 | MYS | 1 | 21.522 | 7.279  | 29.301 | 1.00 | 0.00 |
| H      |     |     |     |   |        |        |        |      |      |
| HETATM | 99  | H57 | MYS | 1 | 23.104 | 6.946  | 28.609 | 1.00 | 0.00 |
| H      |     |     |     |   |        |        |        |      |      |
| HETATM | 100 | C33 | MYS | 1 | 21.418 | 6.474  | 27.333 | 1.00 | 0.00 |
| C      |     |     |     |   |        |        |        |      |      |
| HETATM | 101 | H58 | MYS | 1 | 20.677 | 5.814  | 27.783 | 1.00 | 0.00 |
| H      |     |     |     |   |        |        |        |      |      |
| HETATM | 102 | H59 | MYS | 1 | 20.840 | 7.112  | 26.664 | 1.00 | 0.00 |
| H      |     |     |     |   |        |        |        |      |      |
| HETATM | 103 | H60 | MYS | 1 | 22.175 | 5.873  | 26.830 | 1.00 | 0.00 |
| H      |     |     |     |   |        |        |        |      |      |
| HETATM | 104 | N4  | MYS | 1 | 21.624 | 12.058 | 28.662 | 1.00 | 0.00 |
| N      |     |     |     |   |        |        |        |      |      |
| HETATM | 105 | H61 | MYS | 1 | 20.927 | 12.312 | 27.977 | 1.00 | 0.00 |
| H      |     |     |     |   |        |        |        |      |      |
| HETATM | 106 | C34 | MYS | 1 | 21.476 | 12.515 | 29.922 | 1.00 | 0.00 |
| C      |     |     |     |   |        |        |        |      |      |
| HETATM | 107 | O8  | MYS | 1 | 22.343 | 12.473 | 30.805 | 1.00 | 0.00 |
| O      |     |     |     |   |        |        |        |      |      |
| HETATM | 108 | C35 | MYS | 1 | 20.165 | 13.260 | 30.207 | 1.00 | 0.00 |
| C      |     |     |     |   |        |        |        |      |      |
| HETATM | 109 | H62 | MYS | 1 | 19.363 | 12.659 | 29.777 | 1.00 | 0.00 |
| H      |     |     |     |   |        |        |        |      |      |
| HETATM | 110 | H63 | MYS | 1 | 20.017 | 13.282 | 31.287 | 1.00 | 0.00 |
| H      |     |     |     |   |        |        |        |      |      |
| HETATM | 111 | C36 | MYS | 1 | 20.074 | 14.670 | 29.506 | 1.00 | 0.00 |
| C      |     |     |     |   |        |        |        |      |      |

|        |     |     |     |   |        |        |        |      |      |
|--------|-----|-----|-----|---|--------|--------|--------|------|------|
| HETATM | 112 | H64 | MYS | 1 | 20.878 | 15.240 | 29.972 | 1.00 | 0.00 |
| H      |     |     |     |   |        |        |        |      |      |
| HETATM | 113 | H65 | MYS | 1 | 20.110 | 14.778 | 28.422 | 1.00 | 0.00 |
| H      |     |     |     |   |        |        |        |      |      |
| HETATM | 114 | C37 | MYS | 1 | 18.841 | 15.428 | 29.902 | 1.00 | 0.00 |
| C      |     |     |     |   |        |        |        |      |      |
| HETATM | 115 | H66 | MYS | 1 | 17.974 | 14.938 | 29.459 | 1.00 | 0.00 |
| H      |     |     |     |   |        |        |        |      |      |
| HETATM | 116 | H67 | MYS | 1 | 18.736 | 15.492 | 30.985 | 1.00 | 0.00 |
| H      |     |     |     |   |        |        |        |      |      |
| HETATM | 117 | C38 | MYS | 1 | 18.745 | 16.865 | 29.386 | 1.00 | 0.00 |
| C      |     |     |     |   |        |        |        |      |      |
| HETATM | 118 | H68 | MYS | 1 | 18.417 | 16.915 | 28.348 | 1.00 | 0.00 |
| H      |     |     |     |   |        |        |        |      |      |
| HETATM | 119 | H69 | MYS | 1 | 19.733 | 17.311 | 29.503 | 1.00 | 0.00 |
| H      |     |     |     |   |        |        |        |      |      |
| HETATM | 120 | C39 | MYS | 1 | 17.802 | 17.721 | 30.257 | 1.00 | 0.00 |
| C      |     |     |     |   |        |        |        |      |      |
| HETATM | 121 | H70 | MYS | 1 | 16.755 | 17.455 | 30.109 | 1.00 | 0.00 |
| H      |     |     |     |   |        |        |        |      |      |
| HETATM | 122 | H71 | MYS | 1 | 17.992 | 17.715 | 31.330 | 1.00 | 0.00 |
| H      |     |     |     |   |        |        |        |      |      |
| HETATM | 123 | C40 | MYS | 1 | 17.904 | 19.199 | 29.767 | 1.00 | 0.00 |
| C      |     |     |     |   |        |        |        |      |      |
| HETATM | 124 | H72 | MYS | 1 | 18.847 | 19.519 | 30.211 | 1.00 | 0.00 |
| H      |     |     |     |   |        |        |        |      |      |
| HETATM | 125 | H73 | MYS | 1 | 17.973 | 19.159 | 28.680 | 1.00 | 0.00 |
| H      |     |     |     |   |        |        |        |      |      |
| HETATM | 126 | C41 | MYS | 1 | 16.693 | 20.024 | 30.163 | 1.00 | 0.00 |
| C      |     |     |     |   |        |        |        |      |      |
| HETATM | 127 | H74 | MYS | 1 | 15.915 | 19.670 | 29.486 | 1.00 | 0.00 |
| H      |     |     |     |   |        |        |        |      |      |
| HETATM | 128 | H75 | MYS | 1 | 16.466 | 19.922 | 31.224 | 1.00 | 0.00 |
| H      |     |     |     |   |        |        |        |      |      |
| HETATM | 129 | C42 | MYS | 1 | 16.872 | 21.526 | 29.947 | 1.00 | 0.00 |
| C      |     |     |     |   |        |        |        |      |      |
| HETATM | 130 | H76 | MYS | 1 | 17.314 | 21.607 | 28.954 | 1.00 | 0.00 |
| H      |     |     |     |   |        |        |        |      |      |
| HETATM | 131 | H77 | MYS | 1 | 17.641 | 21.901 | 30.622 | 1.00 | 0.00 |
| H      |     |     |     |   |        |        |        |      |      |
| HETATM | 132 | C43 | MYS | 1 | 15.568 | 22.371 | 30.036 | 1.00 | 0.00 |
| C      |     |     |     |   |        |        |        |      |      |
| HETATM | 133 | H78 | MYS | 1 | 14.815 | 22.012 | 29.335 | 1.00 | 0.00 |
| H      |     |     |     |   |        |        |        |      |      |
| HETATM | 134 | H79 | MYS | 1 | 15.118 | 22.221 | 31.017 | 1.00 | 0.00 |
| H      |     |     |     |   |        |        |        |      |      |
| HETATM | 135 | C44 | MYS | 1 | 15.797 | 23.921 | 29.914 | 1.00 | 0.00 |
| C      |     |     |     |   |        |        |        |      |      |
| HETATM | 136 | H80 | MYS | 1 | 16.257 | 24.191 | 30.865 | 1.00 | 0.00 |
| H      |     |     |     |   |        |        |        |      |      |
| HETATM | 137 | H81 | MYS | 1 | 16.386 | 24.152 | 29.027 | 1.00 | 0.00 |
| H      |     |     |     |   |        |        |        |      |      |
| HETATM | 138 | C45 | MYS | 1 | 14.517 | 24.648 | 29.912 | 1.00 | 0.00 |
| C      |     |     |     |   |        |        |        |      |      |
| HETATM | 139 | H82 | MYS | 1 | 13.947 | 24.375 | 29.024 | 1.00 | 0.00 |
| H      |     |     |     |   |        |        |        |      |      |



|        |     |     |     |   |        |        |        |      |      |
|--------|-----|-----|-----|---|--------|--------|--------|------|------|
| HETATM | 140 | H83 | MYS | 1 | 13.929 | 24.376 | 30.789 | 1.00 | 0.00 |
| H      |     |     |     |   |        |        |        |      |      |
| HETATM | 141 | C46 | MYS | 1 | 14.840 | 26.190 | 29.851 | 1.00 | 0.00 |
| C      |     |     |     |   |        |        |        |      |      |
| HETATM | 142 | H84 | MYS | 1 | 14.843 | 26.451 | 28.793 | 1.00 | 0.00 |
| H      |     |     |     |   |        |        |        |      |      |
| HETATM | 143 | H85 | MYS | 1 | 15.832 | 26.413 | 30.243 | 1.00 | 0.00 |
| H      |     |     |     |   |        |        |        |      |      |
| HETATM | 144 | C47 | MYS | 1 | 13.736 | 26.929 | 30.596 | 1.00 | 0.00 |
| C      |     |     |     |   |        |        |        |      |      |
| HETATM | 145 | H86 | MYS | 1 | 13.791 | 27.941 | 30.195 | 1.00 | 0.00 |
| H      |     |     |     |   |        |        |        |      |      |
| HETATM | 146 | H87 | MYS | 1 | 12.752 | 26.530 | 30.350 | 1.00 | 0.00 |
| H      |     |     |     |   |        |        |        |      |      |
| HETATM | 147 | C48 | MYS | 1 | 13.959 | 26.976 | 32.113 | 1.00 | 0.00 |
| C      |     |     |     |   |        |        |        |      |      |
| HETATM | 148 | H88 | MYS | 1 | 15.008 | 27.135 | 32.363 | 1.00 | 0.00 |
| H      |     |     |     |   |        |        |        |      |      |
| HETATM | 149 | H89 | MYS | 1 | 13.399 | 27.810 | 32.534 | 1.00 | 0.00 |
| H      |     |     |     |   |        |        |        |      |      |
| HETATM | 150 | H90 | MYS | 1 | 13.506 | 26.062 | 32.498 | 1.00 | 0.00 |
| H      |     |     |     |   |        |        |        |      |      |
| HETATM | 151 | C1  | MYS | 2 | 30.929 | 14.918 | 26.070 | 1.00 | 0.00 |
| C      |     |     |     |   |        |        |        |      |      |
| HETATM | 152 | O1  | MYS | 2 | 31.318 | 15.815 | 25.289 | 1.00 | 0.00 |
| O      |     |     |     |   |        |        |        |      |      |
| HETATM | 153 | C2  | MYS | 2 | 29.666 | 14.095 | 25.680 | 1.00 | 0.00 |
| C      |     |     |     |   |        |        |        |      |      |
| HETATM | 154 | O2  | MYS | 2 | 29.346 | 13.105 | 26.315 | 1.00 | 0.00 |
| O      |     |     |     |   |        |        |        |      |      |
| HETATM | 155 | N1  | MYS | 2 | 31.623 | 14.574 | 27.185 | 1.00 | 0.00 |
| N      |     |     |     |   |        |        |        |      |      |
| HETATM | 156 | H1  | MYS | 2 | 31.369 | 13.694 | 27.611 | 1.00 | 0.00 |
| H      |     |     |     |   |        |        |        |      |      |
| HETATM | 157 | C3  | MYS | 2 | 32.863 | 15.112 | 27.741 | 1.00 | 0.00 |
| C      |     |     |     |   |        |        |        |      |      |
| HETATM | 158 | H2  | MYS | 2 | 33.343 | 15.689 | 26.951 | 1.00 | 0.00 |
| H      |     |     |     |   |        |        |        |      |      |
| HETATM | 159 | H3  | MYS | 2 | 33.552 | 14.293 | 27.944 | 1.00 | 0.00 |
| H      |     |     |     |   |        |        |        |      |      |
| HETATM | 160 | C4  | MYS | 2 | 32.548 | 15.892 | 29.018 | 1.00 | 0.00 |
| C      |     |     |     |   |        |        |        |      |      |
| HETATM | 161 | H4  | MYS | 2 | 31.862 | 15.264 | 29.586 | 1.00 | 0.00 |
| H      |     |     |     |   |        |        |        |      |      |
| HETATM | 162 | H5  | MYS | 2 | 31.904 | 16.722 | 28.727 | 1.00 | 0.00 |
| H      |     |     |     |   |        |        |        |      |      |
| HETATM | 163 | C5  | MYS | 2 | 33.747 | 16.399 | 29.692 | 1.00 | 0.00 |
| C      |     |     |     |   |        |        |        |      |      |
| HETATM | 164 | H6  | MYS | 2 | 34.246 | 17.171 | 29.107 | 1.00 | 0.00 |
| H      |     |     |     |   |        |        |        |      |      |
| HETATM | 165 | H7  | MYS | 2 | 34.465 | 15.593 | 29.847 | 1.00 | 0.00 |
| H      |     |     |     |   |        |        |        |      |      |
| HETATM | 166 | C6  | MYS | 2 | 33.369 | 17.031 | 31.025 | 1.00 | 0.00 |
| C      |     |     |     |   |        |        |        |      |      |
| HETATM | 167 | H8  | MYS | 2 | 32.827 | 16.333 | 31.662 | 1.00 | 0.00 |
| H      |     |     |     |   |        |        |        |      |      |

|        |     |     |     |   |        |        |        |      |      |
|--------|-----|-----|-----|---|--------|--------|--------|------|------|
| HETATM | 168 | H9  | MYS | 2 | 32.826 | 17.975 | 30.966 | 1.00 | 0.00 |
| H      |     |     |     |   |        |        |        |      |      |
| HETATM | 169 | C7  | MYS | 2 | 34.603 | 17.219 | 31.894 | 1.00 | 0.00 |
| C      |     |     |     |   |        |        |        |      |      |
| HETATM | 170 | H10 | MYS | 2 | 35.077 | 16.242 | 31.994 | 1.00 | 0.00 |
| H      |     |     |     |   |        |        |        |      |      |
| HETATM | 171 | C8  | MYS | 2 | 35.699 | 18.079 | 31.248 | 1.00 | 0.00 |
| C      |     |     |     |   |        |        |        |      |      |
| HETATM | 172 | O3  | MYS | 2 | 35.325 | 19.197 | 30.734 | 1.00 | 0.00 |
| O      |     |     |     |   |        |        |        |      |      |
| HETATM | 173 | O4  | MYS | 2 | 36.882 | 17.563 | 31.198 | 1.00 | 0.00 |
| O      |     |     |     |   |        |        |        |      |      |
| HETATM | 174 | C9  | MYS | 2 | 37.929 | 18.253 | 30.484 | 1.00 | 0.00 |
| C      |     |     |     |   |        |        |        |      |      |
| HETATM | 175 | H11 | MYS | 2 | 38.429 | 18.883 | 31.221 | 1.00 | 0.00 |
| H      |     |     |     |   |        |        |        |      |      |
| HETATM | 176 | H12 | MYS | 2 | 37.487 | 18.708 | 29.598 | 1.00 | 0.00 |
| H      |     |     |     |   |        |        |        |      |      |
| HETATM | 177 | C10 | MYS | 2 | 38.880 | 17.153 | 29.988 | 1.00 | 0.00 |
| C      |     |     |     |   |        |        |        |      |      |
| HETATM | 178 | H13 | MYS | 2 | 39.860 | 17.516 | 29.681 | 1.00 | 0.00 |
| H      |     |     |     |   |        |        |        |      |      |
| HETATM | 179 | H14 | MYS | 2 | 39.106 | 16.632 | 30.918 | 1.00 | 0.00 |
| H      |     |     |     |   |        |        |        |      |      |
| HETATM | 180 | H15 | MYS | 2 | 38.337 | 16.548 | 29.261 | 1.00 | 0.00 |
| H      |     |     |     |   |        |        |        |      |      |
| HETATM | 181 | N2  | MYS | 2 | 34.224 | 17.698 | 33.323 | 1.00 | 0.00 |
| N      |     |     |     |   |        |        |        |      |      |
| HETATM | 182 | H16 | MYS | 2 | 34.635 | 17.214 | 34.108 | 1.00 | 0.00 |
| H      |     |     |     |   |        |        |        |      |      |
| HETATM | 183 | C11 | MYS | 2 | 33.503 | 18.748 | 33.552 | 1.00 | 0.00 |
| C      |     |     |     |   |        |        |        |      |      |
| HETATM | 184 | O5  | MYS | 2 | 32.971 | 19.470 | 32.699 | 1.00 | 0.00 |
| O      |     |     |     |   |        |        |        |      |      |
| HETATM | 185 | C12 | MYS | 2 | 33.189 | 19.016 | 35.047 | 1.00 | 0.00 |
| C      |     |     |     |   |        |        |        |      |      |
| HETATM | 186 | H17 | MYS | 2 | 32.497 | 19.857 | 35.089 | 1.00 | 0.00 |
| H      |     |     |     |   |        |        |        |      |      |
| HETATM | 187 | H18 | MYS | 2 | 32.592 | 18.188 | 35.430 | 1.00 | 0.00 |
| H      |     |     |     |   |        |        |        |      |      |
| HETATM | 188 | C13 | MYS | 2 | 34.361 | 19.265 | 35.939 | 1.00 | 0.00 |
| C      |     |     |     |   |        |        |        |      |      |
| HETATM | 189 | H19 | MYS | 2 | 35.066 | 18.438 | 35.859 | 1.00 | 0.00 |
| H      |     |     |     |   |        |        |        |      |      |
| HETATM | 190 | H20 | MYS | 2 | 34.835 | 20.206 | 35.658 | 1.00 | 0.00 |
| H      |     |     |     |   |        |        |        |      |      |
| HETATM | 191 | C14 | MYS | 2 | 33.861 | 19.280 | 37.412 | 1.00 | 0.00 |
| C      |     |     |     |   |        |        |        |      |      |
| HETATM | 192 | H21 | MYS | 2 | 33.066 | 20.021 | 37.495 | 1.00 | 0.00 |
| H      |     |     |     |   |        |        |        |      |      |
| HETATM | 193 | H22 | MYS | 2 | 33.402 | 18.326 | 37.672 | 1.00 | 0.00 |
| H      |     |     |     |   |        |        |        |      |      |
| HETATM | 194 | C15 | MYS | 2 | 35.077 | 19.570 | 38.331 | 1.00 | 0.00 |
| C      |     |     |     |   |        |        |        |      |      |
| HETATM | 195 | H23 | MYS | 2 | 35.848 | 18.805 | 38.423 | 1.00 | 0.00 |
| H      |     |     |     |   |        |        |        |      |      |

|        |     |     |     |   |        |        |        |      |      |
|--------|-----|-----|-----|---|--------|--------|--------|------|------|
| HETATM | 196 | H24 | MYS | 2 | 35.530 | 20.515 | 38.030 | 1.00 | 0.00 |
| H      |     |     |     |   |        |        |        |      |      |
| HETATM | 197 | C16 | MYS | 2 | 34.495 | 19.530 | 39.783 | 1.00 | 0.00 |
| C      |     |     |     |   |        |        |        |      |      |
| HETATM | 198 | H25 | MYS | 2 | 33.544 | 20.062 | 39.771 | 1.00 | 0.00 |
| H      |     |     |     |   |        |        |        |      |      |
| HETATM | 199 | H26 | MYS | 2 | 34.427 | 18.466 | 40.008 | 1.00 | 0.00 |
| H      |     |     |     |   |        |        |        |      |      |
| HETATM | 200 | C17 | MYS | 2 | 35.417 | 20.084 | 40.837 | 1.00 | 0.00 |
| C      |     |     |     |   |        |        |        |      |      |
| HETATM | 201 | H27 | MYS | 2 | 36.447 | 19.753 | 40.704 | 1.00 | 0.00 |
| H      |     |     |     |   |        |        |        |      |      |
| HETATM | 202 | H28 | MYS | 2 | 35.123 | 21.132 | 40.897 | 1.00 | 0.00 |
| H      |     |     |     |   |        |        |        |      |      |
| HETATM | 203 | C18 | MYS | 2 | 35.137 | 19.387 | 42.178 | 1.00 | 0.00 |
| C      |     |     |     |   |        |        |        |      |      |
| HETATM | 204 | H29 | MYS | 2 | 34.152 | 19.722 | 42.504 | 1.00 | 0.00 |
| H      |     |     |     |   |        |        |        |      |      |
| HETATM | 205 | H30 | MYS | 2 | 35.137 | 18.298 | 42.134 | 1.00 | 0.00 |
| H      |     |     |     |   |        |        |        |      |      |
| HETATM | 206 | C19 | MYS | 2 | 36.187 | 19.837 | 43.275 | 1.00 | 0.00 |
| C      |     |     |     |   |        |        |        |      |      |
| HETATM | 207 | H31 | MYS | 2 | 36.388 | 20.904 | 43.378 | 1.00 | 0.00 |
| H      |     |     |     |   |        |        |        |      |      |
| HETATM | 208 | H32 | MYS | 2 | 37.109 | 19.285 | 43.096 | 1.00 | 0.00 |
| H      |     |     |     |   |        |        |        |      |      |
| HETATM | 209 | C20 | MYS | 2 | 35.847 | 19.371 | 44.712 | 1.00 | 0.00 |
| C      |     |     |     |   |        |        |        |      |      |
| HETATM | 210 | H33 | MYS | 2 | 34.792 | 19.513 | 44.947 | 1.00 | 0.00 |
| H      |     |     |     |   |        |        |        |      |      |
| HETATM | 211 | H34 | MYS | 2 | 36.137 | 18.322 | 44.772 | 1.00 | 0.00 |
| H      |     |     |     |   |        |        |        |      |      |
| HETATM | 212 | C21 | MYS | 2 | 36.700 | 20.022 | 45.845 | 1.00 | 0.00 |
| C      |     |     |     |   |        |        |        |      |      |
| HETATM | 213 | H35 | MYS | 2 | 37.751 | 19.903 | 45.582 | 1.00 | 0.00 |
| H      |     |     |     |   |        |        |        |      |      |
| HETATM | 214 | H36 | MYS | 2 | 36.494 | 21.090 | 45.912 | 1.00 | 0.00 |
| H      |     |     |     |   |        |        |        |      |      |
| HETATM | 215 | C22 | MYS | 2 | 36.565 | 19.391 | 47.229 | 1.00 | 0.00 |
| C      |     |     |     |   |        |        |        |      |      |
| HETATM | 216 | H37 | MYS | 2 | 35.563 | 19.641 | 47.576 | 1.00 | 0.00 |
| H      |     |     |     |   |        |        |        |      |      |
| HETATM | 217 | H38 | MYS | 2 | 36.805 | 18.328 | 47.268 | 1.00 | 0.00 |
| H      |     |     |     |   |        |        |        |      |      |
| HETATM | 218 | C23 | MYS | 2 | 37.510 | 19.919 | 48.258 | 1.00 | 0.00 |
| C      |     |     |     |   |        |        |        |      |      |
| HETATM | 219 | H39 | MYS | 2 | 38.454 | 20.148 | 47.764 | 1.00 | 0.00 |
| H      |     |     |     |   |        |        |        |      |      |
| HETATM | 220 | H40 | MYS | 2 | 37.090 | 20.882 | 48.550 | 1.00 | 0.00 |
| H      |     |     |     |   |        |        |        |      |      |
| HETATM | 221 | C24 | MYS | 2 | 37.792 | 18.950 | 49.473 | 1.00 | 0.00 |
| C      |     |     |     |   |        |        |        |      |      |
| HETATM | 222 | H41 | MYS | 2 | 38.073 | 17.943 | 49.166 | 1.00 | 0.00 |
| H      |     |     |     |   |        |        |        |      |      |
| HETATM | 223 | H42 | MYS | 2 | 37.046 | 18.825 | 50.258 | 1.00 | 0.00 |
| H      |     |     |     |   |        |        |        |      |      |

|        |     |     |     |   |        |        |        |      |      |
|--------|-----|-----|-----|---|--------|--------|--------|------|------|
| HETATM | 224 | C25 | MYS | 2 | 38.947 | 19.609 | 50.323 | 1.00 | 0.00 |
| C      |     |     |     |   |        |        |        |      |      |
| HETATM | 225 | H43 | MYS | 2 | 39.319 | 19.001 | 51.148 | 1.00 | 0.00 |
| H      |     |     |     |   |        |        |        |      |      |
| HETATM | 226 | H44 | MYS | 2 | 39.795 | 19.928 | 49.716 | 1.00 | 0.00 |
| H      |     |     |     |   |        |        |        |      |      |
| HETATM | 227 | H45 | MYS | 2 | 38.490 | 20.499 | 50.756 | 1.00 | 0.00 |
| H      |     |     |     |   |        |        |        |      |      |
| HETATM | 228 | N3  | MYS | 2 | 28.986 | 14.565 | 24.617 | 1.00 | 0.00 |
| N      |     |     |     |   |        |        |        |      |      |
| HETATM | 229 | H46 | MYS | 2 | 29.338 | 15.414 | 24.198 | 1.00 | 0.00 |
| H      |     |     |     |   |        |        |        |      |      |
| HETATM | 230 | C26 | MYS | 2 | 27.856 | 13.883 | 23.971 | 1.00 | 0.00 |
| C      |     |     |     |   |        |        |        |      |      |
| HETATM | 231 | H47 | MYS | 2 | 27.811 | 12.854 | 24.327 | 1.00 | 0.00 |
| H      |     |     |     |   |        |        |        |      |      |
| HETATM | 232 | H48 | MYS | 2 | 28.065 | 14.009 | 22.909 | 1.00 | 0.00 |
| H      |     |     |     |   |        |        |        |      |      |
| HETATM | 233 | C27 | MYS | 2 | 26.506 | 14.520 | 24.351 | 1.00 | 0.00 |
| C      |     |     |     |   |        |        |        |      |      |
| HETATM | 234 | H49 | MYS | 2 | 26.516 | 15.605 | 24.452 | 1.00 | 0.00 |
| H      |     |     |     |   |        |        |        |      |      |
| HETATM | 235 | H50 | MYS | 2 | 26.164 | 14.190 | 25.332 | 1.00 | 0.00 |
| H      |     |     |     |   |        |        |        |      |      |
| HETATM | 236 | C28 | MYS | 2 | 25.425 | 14.005 | 23.396 | 1.00 | 0.00 |
| C      |     |     |     |   |        |        |        |      |      |
| HETATM | 237 | H51 | MYS | 2 | 25.415 | 12.916 | 23.356 | 1.00 | 0.00 |
| H      |     |     |     |   |        |        |        |      |      |
| HETATM | 238 | H52 | MYS | 2 | 25.521 | 14.381 | 22.377 | 1.00 | 0.00 |
| H      |     |     |     |   |        |        |        |      |      |
| HETATM | 239 | C29 | MYS | 2 | 24.066 | 14.436 | 23.898 | 1.00 | 0.00 |
| C      |     |     |     |   |        |        |        |      |      |
| HETATM | 240 | H53 | MYS | 2 | 24.077 | 15.518 | 24.028 | 1.00 | 0.00 |
| H      |     |     |     |   |        |        |        |      |      |
| HETATM | 241 | H54 | MYS | 2 | 23.794 | 14.040 | 24.877 | 1.00 | 0.00 |
| H      |     |     |     |   |        |        |        |      |      |
| HETATM | 242 | C30 | MYS | 2 | 22.929 | 14.000 | 22.934 | 1.00 | 0.00 |
| C      |     |     |     |   |        |        |        |      |      |
| HETATM | 243 | H55 | MYS | 2 | 23.296 | 14.383 | 21.982 | 1.00 | 0.00 |
| H      |     |     |     |   |        |        |        |      |      |
| HETATM | 244 | C31 | MYS | 2 | 22.727 | 12.484 | 22.863 | 1.00 | 0.00 |
| C      |     |     |     |   |        |        |        |      |      |
| HETATM | 245 | O6  | MYS | 2 | 22.697 | 11.771 | 23.805 | 1.00 | 0.00 |
| O      |     |     |     |   |        |        |        |      |      |
| HETATM | 246 | O7  | MYS | 2 | 22.553 | 12.056 | 21.608 | 1.00 | 0.00 |
| O      |     |     |     |   |        |        |        |      |      |
| HETATM | 247 | C32 | MYS | 2 | 22.973 | 10.813 | 21.060 | 1.00 | 0.00 |
| C      |     |     |     |   |        |        |        |      |      |
| HETATM | 248 | H56 | MYS | 2 | 23.918 | 10.601 | 21.560 | 1.00 | 0.00 |
| H      |     |     |     |   |        |        |        |      |      |
| HETATM | 249 | H57 | MYS | 2 | 23.119 | 10.922 | 19.985 | 1.00 | 0.00 |
| H      |     |     |     |   |        |        |        |      |      |
| HETATM | 250 | C33 | MYS | 2 | 21.861 | 9.874  | 21.433 | 1.00 | 0.00 |
| C      |     |     |     |   |        |        |        |      |      |
| HETATM | 251 | H58 | MYS | 2 | 20.943 | 10.459 | 21.382 | 1.00 | 0.00 |
| H      |     |     |     |   |        |        |        |      |      |

|        |     |     |     |   |        |        |        |      |      |
|--------|-----|-----|-----|---|--------|--------|--------|------|------|
| HETATM | 252 | H59 | MYS | 2 | 21.762 | 9.003  | 20.786 | 1.00 | 0.00 |
| H      |     |     |     |   |        |        |        |      |      |
| HETATM | 253 | H60 | MYS | 2 | 22.111 | 9.477  | 22.417 | 1.00 | 0.00 |
| H      |     |     |     |   |        |        |        |      |      |
| HETATM | 254 | N4  | MYS | 2 | 21.754 | 14.786 | 23.206 | 1.00 | 0.00 |
| N      |     |     |     |   |        |        |        |      |      |
| HETATM | 255 | H61 | MYS | 2 | 21.603 | 15.535 | 22.546 | 1.00 | 0.00 |
| H      |     |     |     |   |        |        |        |      |      |
| HETATM | 256 | C34 | MYS | 2 | 20.765 | 14.626 | 24.099 | 1.00 | 0.00 |
| C      |     |     |     |   |        |        |        |      |      |
| HETATM | 257 | O8  | MYS | 2 | 20.708 | 13.683 | 24.849 | 1.00 | 0.00 |
| O      |     |     |     |   |        |        |        |      |      |
| HETATM | 258 | C35 | MYS | 2 | 19.703 | 15.782 | 24.167 | 1.00 | 0.00 |
| C      |     |     |     |   |        |        |        |      |      |
| HETATM | 259 | H62 | MYS | 2 | 20.212 | 16.726 | 24.364 | 1.00 | 0.00 |
| H      |     |     |     |   |        |        |        |      |      |
| HETATM | 260 | H63 | MYS | 2 | 19.249 | 15.880 | 23.180 | 1.00 | 0.00 |
| H      |     |     |     |   |        |        |        |      |      |
| HETATM | 261 | C36 | MYS | 2 | 18.631 | 15.550 | 25.213 | 1.00 | 0.00 |
| C      |     |     |     |   |        |        |        |      |      |
| HETATM | 262 | H64 | MYS | 2 | 18.126 | 14.585 | 25.171 | 1.00 | 0.00 |
| H      |     |     |     |   |        |        |        |      |      |
| HETATM | 263 | H65 | MYS | 2 | 19.304 | 15.618 | 26.068 | 1.00 | 0.00 |
| H      |     |     |     |   |        |        |        |      |      |
| HETATM | 264 | C37 | MYS | 2 | 17.539 | 16.578 | 25.199 | 1.00 | 0.00 |
| C      |     |     |     |   |        |        |        |      |      |
| HETATM | 265 | H66 | MYS | 2 | 17.023 | 16.499 | 24.242 | 1.00 | 0.00 |
| H      |     |     |     |   |        |        |        |      |      |
| HETATM | 266 | H67 | MYS | 2 | 16.712 | 16.338 | 25.867 | 1.00 | 0.00 |
| H      |     |     |     |   |        |        |        |      |      |
| HETATM | 267 | C38 | MYS | 2 | 18.046 | 18.047 | 25.376 | 1.00 | 0.00 |
| C      |     |     |     |   |        |        |        |      |      |
| HETATM | 268 | H68 | MYS | 2 | 18.630 | 18.420 | 24.534 | 1.00 | 0.00 |
| H      |     |     |     |   |        |        |        |      |      |
| HETATM | 269 | H69 | MYS | 2 | 18.649 | 18.207 | 26.270 | 1.00 | 0.00 |
| H      |     |     |     |   |        |        |        |      |      |
| HETATM | 270 | C39 | MYS | 2 | 16.719 | 18.924 | 25.527 | 1.00 | 0.00 |
| C      |     |     |     |   |        |        |        |      |      |
| HETATM | 271 | H70 | MYS | 2 | 16.068 | 18.814 | 24.660 | 1.00 | 0.00 |
| H      |     |     |     |   |        |        |        |      |      |
| HETATM | 272 | H71 | MYS | 2 | 16.152 | 18.444 | 26.325 | 1.00 | 0.00 |
| H      |     |     |     |   |        |        |        |      |      |
| HETATM | 273 | C40 | MYS | 2 | 17.041 | 20.377 | 25.740 | 1.00 | 0.00 |
| C      |     |     |     |   |        |        |        |      |      |
| HETATM | 274 | H72 | MYS | 2 | 17.687 | 20.457 | 26.613 | 1.00 | 0.00 |
| H      |     |     |     |   |        |        |        |      |      |
| HETATM | 275 | H73 | MYS | 2 | 17.390 | 20.705 | 24.761 | 1.00 | 0.00 |
| H      |     |     |     |   |        |        |        |      |      |
| HETATM | 276 | C41 | MYS | 2 | 15.746 | 21.171 | 25.940 | 1.00 | 0.00 |
| C      |     |     |     |   |        |        |        |      |      |
| HETATM | 277 | H74 | MYS | 2 | 15.094 | 20.844 | 25.130 | 1.00 | 0.00 |
| H      |     |     |     |   |        |        |        |      |      |
| HETATM | 278 | H75 | MYS | 2 | 15.381 | 20.883 | 26.926 | 1.00 | 0.00 |
| H      |     |     |     |   |        |        |        |      |      |
| HETATM | 279 | C42 | MYS | 2 | 16.058 | 22.694 | 25.817 | 1.00 | 0.00 |
| C      |     |     |     |   |        |        |        |      |      |

|        |     |     |     |   |        |        |        |      |      |
|--------|-----|-----|-----|---|--------|--------|--------|------|------|
| HETATM | 280 | H76 | MYS | 2 | 16.653 | 22.880 | 24.922 | 1.00 | 0.00 |
| H      |     |     |     |   |        |        |        |      |      |
| HETATM | 281 | H77 | MYS | 2 | 16.703 | 23.059 | 26.616 | 1.00 | 0.00 |
| H      |     |     |     |   |        |        |        |      |      |
| HETATM | 282 | C43 | MYS | 2 | 14.774 | 23.476 | 25.867 | 1.00 | 0.00 |
| C      |     |     |     |   |        |        |        |      |      |
| HETATM | 283 | H78 | MYS | 2 | 14.133 | 23.073 | 25.083 | 1.00 | 0.00 |
| H      |     |     |     |   |        |        |        |      |      |
| HETATM | 284 | H79 | MYS | 2 | 14.258 | 23.356 | 26.820 | 1.00 | 0.00 |
| H      |     |     |     |   |        |        |        |      |      |
| HETATM | 285 | C44 | MYS | 2 | 15.092 | 24.936 | 25.661 | 1.00 | 0.00 |
| C      |     |     |     |   |        |        |        |      |      |
| HETATM | 286 | H80 | MYS | 2 | 15.995 | 25.285 | 26.162 | 1.00 | 0.00 |
| H      |     |     |     |   |        |        |        |      |      |
| HETATM | 287 | H81 | MYS | 2 | 15.177 | 25.148 | 24.595 | 1.00 | 0.00 |
| H      |     |     |     |   |        |        |        |      |      |
| HETATM | 288 | C45 | MYS | 2 | 13.924 | 25.799 | 26.239 | 1.00 | 0.00 |
| C      |     |     |     |   |        |        |        |      |      |
| HETATM | 289 | H82 | MYS | 2 | 13.004 | 25.597 | 25.691 | 1.00 | 0.00 |
| H      |     |     |     |   |        |        |        |      |      |
| HETATM | 290 | H83 | MYS | 2 | 13.761 | 25.617 | 27.301 | 1.00 | 0.00 |
| H      |     |     |     |   |        |        |        |      |      |
| HETATM | 291 | C46 | MYS | 2 | 14.255 | 27.326 | 26.048 | 1.00 | 0.00 |
| C      |     |     |     |   |        |        |        |      |      |
| HETATM | 292 | H84 | MYS | 2 | 14.401 | 27.561 | 24.994 | 1.00 | 0.00 |
| H      |     |     |     |   |        |        |        |      |      |
| HETATM | 293 | H85 | MYS | 2 | 15.203 | 27.672 | 26.461 | 1.00 | 0.00 |
| H      |     |     |     |   |        |        |        |      |      |
| HETATM | 294 | C47 | MYS | 2 | 13.243 | 28.229 | 26.646 | 1.00 | 0.00 |
| C      |     |     |     |   |        |        |        |      |      |
| HETATM | 295 | H86 | MYS | 2 | 12.264 | 27.935 | 26.267 | 1.00 | 0.00 |
| H      |     |     |     |   |        |        |        |      |      |
| HETATM | 296 | H87 | MYS | 2 | 13.104 | 28.065 | 27.715 | 1.00 | 0.00 |
| H      |     |     |     |   |        |        |        |      |      |
| HETATM | 297 | C48 | MYS | 2 | 13.460 | 29.751 | 26.386 | 1.00 | 0.00 |
| C      |     |     |     |   |        |        |        |      |      |
| HETATM | 298 | H88 | MYS | 2 | 12.812 | 30.291 | 27.076 | 1.00 | 0.00 |
| H      |     |     |     |   |        |        |        |      |      |
| HETATM | 299 | H89 | MYS | 2 | 14.469 | 30.095 | 26.614 | 1.00 | 0.00 |
| H      |     |     |     |   |        |        |        |      |      |
| HETATM | 300 | H90 | MYS | 2 | 13.279 | 29.931 | 25.326 | 1.00 | 0.00 |
| H      |     |     |     |   |        |        |        |      |      |
| HETATM | 301 | C1  | MYS | 3 | 29.855 | 19.230 | 23.258 | 1.00 | 0.00 |
| C      |     |     |     |   |        |        |        |      |      |
| HETATM | 302 | O1  | MYS | 3 | 29.758 | 20.409 | 22.962 | 1.00 | 0.00 |
| O      |     |     |     |   |        |        |        |      |      |
| HETATM | 303 | C2  | MYS | 3 | 29.048 | 18.096 | 22.532 | 1.00 | 0.00 |
| C      |     |     |     |   |        |        |        |      |      |
| HETATM | 304 | O2  | MYS | 3 | 29.280 | 16.890 | 22.758 | 1.00 | 0.00 |
| O      |     |     |     |   |        |        |        |      |      |
| HETATM | 305 | N1  | MYS | 3 | 30.587 | 18.851 | 24.245 | 1.00 | 0.00 |
| N      |     |     |     |   |        |        |        |      |      |
| HETATM | 306 | H1  | MYS | 3 | 30.655 | 17.869 | 24.472 | 1.00 | 0.00 |
| H      |     |     |     |   |        |        |        |      |      |
| HETATM | 307 | C3  | MYS | 3 | 31.720 | 19.578 | 24.852 | 1.00 | 0.00 |
| C      |     |     |     |   |        |        |        |      |      |

|        |     |     |     |   |        |        |        |      |      |
|--------|-----|-----|-----|---|--------|--------|--------|------|------|
| HETATM | 308 | H2  | MYS | 3 | 32.151 | 20.320 | 24.179 | 1.00 | 0.00 |
| H      |     |     |     |   |        |        |        |      |      |
| HETATM | 309 | H3  | MYS | 3 | 32.497 | 18.862 | 25.119 | 1.00 | 0.00 |
| H      |     |     |     |   |        |        |        |      |      |
| HETATM | 310 | C4  | MYS | 3 | 31.279 | 20.354 | 26.082 | 1.00 | 0.00 |
| C      |     |     |     |   |        |        |        |      |      |
| HETATM | 311 | H4  | MYS | 3 | 30.550 | 19.745 | 26.616 | 1.00 | 0.00 |
| H      |     |     |     |   |        |        |        |      |      |
| HETATM | 312 | H5  | MYS | 3 | 30.838 | 21.298 | 25.762 | 1.00 | 0.00 |
| H      |     |     |     |   |        |        |        |      |      |
| HETATM | 313 | C5  | MYS | 3 | 32.451 | 20.503 | 27.058 | 1.00 | 0.00 |
| C      |     |     |     |   |        |        |        |      |      |
| HETATM | 314 | H6  | MYS | 3 | 33.178 | 21.190 | 26.624 | 1.00 | 0.00 |
| H      |     |     |     |   |        |        |        |      |      |
| HETATM | 315 | H7  | MYS | 3 | 32.864 | 19.518 | 27.277 | 1.00 | 0.00 |
| H      |     |     |     |   |        |        |        |      |      |
| HETATM | 316 | C6  | MYS | 3 | 31.994 | 21.252 | 28.268 | 1.00 | 0.00 |
| C      |     |     |     |   |        |        |        |      |      |
| HETATM | 317 | H8  | MYS | 3 | 31.345 | 20.567 | 28.814 | 1.00 | 0.00 |
| H      |     |     |     |   |        |        |        |      |      |
| HETATM | 318 | H9  | MYS | 3 | 31.519 | 22.176 | 27.941 | 1.00 | 0.00 |
| H      |     |     |     |   |        |        |        |      |      |
| HETATM | 319 | C7  | MYS | 3 | 33.097 | 21.559 | 29.358 | 1.00 | 0.00 |
| C      |     |     |     |   |        |        |        |      |      |
| HETATM | 320 | H10 | MYS | 3 | 33.738 | 20.683 | 29.254 | 1.00 | 0.00 |
| H      |     |     |     |   |        |        |        |      |      |
| HETATM | 321 | C8  | MYS | 3 | 34.127 | 22.654 | 29.011 | 1.00 | 0.00 |
| C      |     |     |     |   |        |        |        |      |      |
| HETATM | 322 | O3  | MYS | 3 | 35.051 | 22.874 | 29.774 | 1.00 | 0.00 |
| O      |     |     |     |   |        |        |        |      |      |
| HETATM | 323 | O4  | MYS | 3 | 33.787 | 23.472 | 28.053 | 1.00 | 0.00 |
| O      |     |     |     |   |        |        |        |      |      |
| HETATM | 324 | C9  | MYS | 3 | 34.530 | 24.627 | 27.723 | 1.00 | 0.00 |
| C      |     |     |     |   |        |        |        |      |      |
| HETATM | 325 | H11 | MYS | 3 | 35.605 | 24.461 | 27.642 | 1.00 | 0.00 |
| H      |     |     |     |   |        |        |        |      |      |
| HETATM | 326 | H12 | MYS | 3 | 34.438 | 25.427 | 28.458 | 1.00 | 0.00 |
| H      |     |     |     |   |        |        |        |      |      |
| HETATM | 327 | C10 | MYS | 3 | 34.075 | 25.268 | 26.409 | 1.00 | 0.00 |
| C      |     |     |     |   |        |        |        |      |      |
| HETATM | 328 | H13 | MYS | 3 | 34.051 | 24.541 | 25.597 | 1.00 | 0.00 |
| H      |     |     |     |   |        |        |        |      |      |
| HETATM | 329 | H14 | MYS | 3 | 33.156 | 25.834 | 26.559 | 1.00 | 0.00 |
| H      |     |     |     |   |        |        |        |      |      |
| HETATM | 330 | H15 | MYS | 3 | 34.849 | 25.976 | 26.111 | 1.00 | 0.00 |
| H      |     |     |     |   |        |        |        |      |      |
| HETATM | 331 | N2  | MYS | 3 | 32.555 | 21.543 | 30.766 | 1.00 | 0.00 |
| N      |     |     |     |   |        |        |        |      |      |
| HETATM | 332 | H16 | MYS | 3 | 32.615 | 20.711 | 31.336 | 1.00 | 0.00 |
| H      |     |     |     |   |        |        |        |      |      |
| HETATM | 333 | C11 | MYS | 3 | 31.925 | 22.592 | 31.308 | 1.00 | 0.00 |
| C      |     |     |     |   |        |        |        |      |      |
| HETATM | 334 | O5  | MYS | 3 | 31.685 | 23.672 | 30.750 | 1.00 | 0.00 |
| O      |     |     |     |   |        |        |        |      |      |
| HETATM | 335 | C12 | MYS | 3 | 31.399 | 22.372 | 32.769 | 1.00 | 0.00 |
| C      |     |     |     |   |        |        |        |      |      |

|        |     |     |     |   |        |        |        |      |      |
|--------|-----|-----|-----|---|--------|--------|--------|------|------|
| HETATM | 336 | H17 | MYS | 3 | 30.518 | 22.998 | 32.908 | 1.00 | 0.00 |
| H      |     |     |     |   |        |        |        |      |      |
| HETATM | 337 | H18 | MYS | 3 | 31.044 | 21.363 | 32.979 | 1.00 | 0.00 |
| H      |     |     |     |   |        |        |        |      |      |
| HETATM | 338 | C13 | MYS | 3 | 32.362 | 22.830 | 33.892 | 1.00 | 0.00 |
| C      |     |     |     |   |        |        |        |      |      |
| HETATM | 339 | H19 | MYS | 3 | 33.014 | 21.958 | 33.840 | 1.00 | 0.00 |
| H      |     |     |     |   |        |        |        |      |      |
| HETATM | 340 | H20 | MYS | 3 | 32.812 | 23.748 | 33.514 | 1.00 | 0.00 |
| H      |     |     |     |   |        |        |        |      |      |
| HETATM | 341 | C14 | MYS | 3 | 31.799 | 22.914 | 35.354 | 1.00 | 0.00 |
| C      |     |     |     |   |        |        |        |      |      |
| HETATM | 342 | H21 | MYS | 3 | 31.030 | 23.679 | 35.462 | 1.00 | 0.00 |
| H      |     |     |     |   |        |        |        |      |      |
| HETATM | 343 | H22 | MYS | 3 | 31.354 | 21.942 | 35.564 | 1.00 | 0.00 |
| H      |     |     |     |   |        |        |        |      |      |
| HETATM | 344 | C15 | MYS | 3 | 32.823 | 23.214 | 36.413 | 1.00 | 0.00 |
| C      |     |     |     |   |        |        |        |      |      |
| HETATM | 345 | H23 | MYS | 3 | 33.643 | 22.506 | 36.286 | 1.00 | 0.00 |
| H      |     |     |     |   |        |        |        |      |      |
| HETATM | 346 | H24 | MYS | 3 | 33.156 | 24.215 | 36.140 | 1.00 | 0.00 |
| H      |     |     |     |   |        |        |        |      |      |
| HETATM | 347 | C16 | MYS | 3 | 32.317 | 23.218 | 37.841 | 1.00 | 0.00 |
| C      |     |     |     |   |        |        |        |      |      |
| HETATM | 348 | H25 | MYS | 3 | 31.494 | 23.924 | 37.961 | 1.00 | 0.00 |
| H      |     |     |     |   |        |        |        |      |      |
| HETATM | 349 | H26 | MYS | 3 | 31.992 | 22.209 | 38.095 | 1.00 | 0.00 |
| H      |     |     |     |   |        |        |        |      |      |
| HETATM | 350 | C17 | MYS | 3 | 33.332 | 23.582 | 38.898 | 1.00 | 0.00 |
| C      |     |     |     |   |        |        |        |      |      |
| HETATM | 351 | H27 | MYS | 3 | 34.256 | 23.003 | 38.890 | 1.00 | 0.00 |
| H      |     |     |     |   |        |        |        |      |      |
| HETATM | 352 | H28 | MYS | 3 | 33.481 | 24.640 | 38.682 | 1.00 | 0.00 |
| H      |     |     |     |   |        |        |        |      |      |
| HETATM | 353 | C18 | MYS | 3 | 32.695 | 23.503 | 40.282 | 1.00 | 0.00 |
| C      |     |     |     |   |        |        |        |      |      |
| HETATM | 354 | H29 | MYS | 3 | 31.752 | 24.047 | 40.327 | 1.00 | 0.00 |
| H      |     |     |     |   |        |        |        |      |      |
| HETATM | 355 | H30 | MYS | 3 | 32.504 | 22.484 | 40.619 | 1.00 | 0.00 |
| H      |     |     |     |   |        |        |        |      |      |
| HETATM | 356 | C19 | MYS | 3 | 33.585 | 24.164 | 41.390 | 1.00 | 0.00 |
| C      |     |     |     |   |        |        |        |      |      |
| HETATM | 357 | H31 | MYS | 3 | 33.924 | 25.122 | 40.996 | 1.00 | 0.00 |
| H      |     |     |     |   |        |        |        |      |      |
| HETATM | 358 | H32 | MYS | 3 | 34.409 | 23.511 | 41.677 | 1.00 | 0.00 |
| H      |     |     |     |   |        |        |        |      |      |
| HETATM | 359 | C20 | MYS | 3 | 32.574 | 24.578 | 42.520 | 1.00 | 0.00 |
| C      |     |     |     |   |        |        |        |      |      |
| HETATM | 360 | H33 | MYS | 3 | 33.198 | 25.218 | 43.143 | 1.00 | 0.00 |
| H      |     |     |     |   |        |        |        |      |      |
| HETATM | 361 | H34 | MYS | 3 | 31.760 | 25.164 | 42.093 | 1.00 | 0.00 |
| H      |     |     |     |   |        |        |        |      |      |
| HETATM | 362 | C21 | MYS | 3 | 31.987 | 23.411 | 43.414 | 1.00 | 0.00 |
| C      |     |     |     |   |        |        |        |      |      |
| HETATM | 363 | H35 | MYS | 3 | 31.310 | 23.791 | 44.179 | 1.00 | 0.00 |
| H      |     |     |     |   |        |        |        |      |      |



|        |     |     |     |   |        |        |        |      |      |
|--------|-----|-----|-----|---|--------|--------|--------|------|------|
| HETATM | 364 | H36 | MYS | 3 | 31.319 | 22.856 | 42.756 | 1.00 | 0.00 |
| H      |     |     |     |   |        |        |        |      |      |
| HETATM | 365 | C22 | MYS | 3 | 33.049 | 22.410 | 43.967 | 1.00 | 0.00 |
| C      |     |     |     |   |        |        |        |      |      |
| HETATM | 366 | H37 | MYS | 3 | 32.555 | 21.476 | 44.235 | 1.00 | 0.00 |
| H      |     |     |     |   |        |        |        |      |      |
| HETATM | 367 | H38 | MYS | 3 | 33.840 | 22.111 | 43.279 | 1.00 | 0.00 |
| H      |     |     |     |   |        |        |        |      |      |
| HETATM | 368 | C23 | MYS | 3 | 33.697 | 22.945 | 45.280 | 1.00 | 0.00 |
| C      |     |     |     |   |        |        |        |      |      |
| HETATM | 369 | H39 | MYS | 3 | 34.610 | 22.379 | 45.468 | 1.00 | 0.00 |
| H      |     |     |     |   |        |        |        |      |      |
| HETATM | 370 | H40 | MYS | 3 | 33.965 | 24.000 | 45.226 | 1.00 | 0.00 |
| H      |     |     |     |   |        |        |        |      |      |
| HETATM | 371 | C24 | MYS | 3 | 32.831 | 22.910 | 46.543 | 1.00 | 0.00 |
| C      |     |     |     |   |        |        |        |      |      |
| HETATM | 372 | H41 | MYS | 3 | 32.326 | 21.946 | 46.601 | 1.00 | 0.00 |
| H      |     |     |     |   |        |        |        |      |      |
| HETATM | 373 | H42 | MYS | 3 | 32.140 | 23.748 | 46.460 | 1.00 | 0.00 |
| H      |     |     |     |   |        |        |        |      |      |
| HETATM | 374 | C25 | MYS | 3 | 33.672 | 22.948 | 47.786 | 1.00 | 0.00 |
| C      |     |     |     |   |        |        |        |      |      |
| HETATM | 375 | H43 | MYS | 3 | 34.240 | 23.879 | 47.803 | 1.00 | 0.00 |
| H      |     |     |     |   |        |        |        |      |      |
| HETATM | 376 | H44 | MYS | 3 | 33.012 | 22.794 | 48.640 | 1.00 | 0.00 |
| H      |     |     |     |   |        |        |        |      |      |
| HETATM | 377 | H45 | MYS | 3 | 34.410 | 22.146 | 47.812 | 1.00 | 0.00 |
| H      |     |     |     |   |        |        |        |      |      |
| HETATM | 378 | N3  | MYS | 3 | 28.216 | 18.485 | 21.553 | 1.00 | 0.00 |
| N      |     |     |     |   |        |        |        |      |      |
| HETATM | 379 | H46 | MYS | 3 | 28.082 | 19.485 | 21.526 | 1.00 | 0.00 |
| H      |     |     |     |   |        |        |        |      |      |
| HETATM | 380 | C26 | MYS | 3 | 27.421 | 17.650 | 20.742 | 1.00 | 0.00 |
| C      |     |     |     |   |        |        |        |      |      |
| HETATM | 381 | H47 | MYS | 3 | 27.610 | 16.588 | 20.895 | 1.00 | 0.00 |
| H      |     |     |     |   |        |        |        |      |      |
| HETATM | 382 | H48 | MYS | 3 | 27.543 | 17.791 | 19.668 | 1.00 | 0.00 |
| H      |     |     |     |   |        |        |        |      |      |
| HETATM | 383 | C27 | MYS | 3 | 26.005 | 17.962 | 21.106 | 1.00 | 0.00 |
| C      |     |     |     |   |        |        |        |      |      |
| HETATM | 384 | H49 | MYS | 3 | 25.810 | 19.034 | 21.144 | 1.00 | 0.00 |
| H      |     |     |     |   |        |        |        |      |      |
| HETATM | 385 | H50 | MYS | 3 | 25.793 | 17.683 | 22.138 | 1.00 | 0.00 |
| H      |     |     |     |   |        |        |        |      |      |
| HETATM | 386 | C28 | MYS | 3 | 25.027 | 17.307 | 20.111 | 1.00 | 0.00 |
| C      |     |     |     |   |        |        |        |      |      |
| HETATM | 387 | H51 | MYS | 3 | 25.174 | 16.233 | 19.995 | 1.00 | 0.00 |
| H      |     |     |     |   |        |        |        |      |      |
| HETATM | 388 | H52 | MYS | 3 | 25.149 | 17.749 | 19.122 | 1.00 | 0.00 |
| H      |     |     |     |   |        |        |        |      |      |
| HETATM | 389 | C29 | MYS | 3 | 23.572 | 17.556 | 20.573 | 1.00 | 0.00 |
| C      |     |     |     |   |        |        |        |      |      |
| HETATM | 390 | H53 | MYS | 3 | 23.391 | 18.587 | 20.879 | 1.00 | 0.00 |
| H      |     |     |     |   |        |        |        |      |      |
| HETATM | 391 | H54 | MYS | 3 | 23.355 | 16.926 | 21.435 | 1.00 | 0.00 |
| H      |     |     |     |   |        |        |        |      |      |

|        |     |     |     |   |        |        |        |      |      |
|--------|-----|-----|-----|---|--------|--------|--------|------|------|
| HETATM | 392 | C30 | MYS | 3 | 22.550 | 17.246 | 19.430 | 1.00 | 0.00 |
| C      |     |     |     |   |        |        |        |      |      |
| HETATM | 393 | H55 | MYS | 3 | 22.984 | 17.558 | 18.480 | 1.00 | 0.00 |
| H      |     |     |     |   |        |        |        |      |      |
| HETATM | 394 | C31 | MYS | 3 | 22.286 | 15.688 | 19.387 | 1.00 | 0.00 |
| C      |     |     |     |   |        |        |        |      |      |
| HETATM | 395 | O6  | MYS | 3 | 21.309 | 15.184 | 19.959 | 1.00 | 0.00 |
| O      |     |     |     |   |        |        |        |      |      |
| HETATM | 396 | O7  | MYS | 3 | 23.136 | 14.898 | 18.648 | 1.00 | 0.00 |
| O      |     |     |     |   |        |        |        |      |      |
| HETATM | 397 | C32 | MYS | 3 | 22.849 | 13.495 | 18.419 | 1.00 | 0.00 |
| C      |     |     |     |   |        |        |        |      |      |
| HETATM | 398 | H56 | MYS | 3 | 21.789 | 13.263 | 18.529 | 1.00 | 0.00 |
| H      |     |     |     |   |        |        |        |      |      |
| HETATM | 399 | H57 | MYS | 3 | 23.365 | 12.947 | 19.207 | 1.00 | 0.00 |
| H      |     |     |     |   |        |        |        |      |      |
| HETATM | 400 | C33 | MYS | 3 | 23.366 | 13.066 | 17.002 | 1.00 | 0.00 |
| C      |     |     |     |   |        |        |        |      |      |
| HETATM | 401 | H58 | MYS | 3 | 23.345 | 11.991 | 16.823 | 1.00 | 0.00 |
| H      |     |     |     |   |        |        |        |      |      |
| HETATM | 402 | H59 | MYS | 3 | 22.710 | 13.461 | 16.225 | 1.00 | 0.00 |
| H      |     |     |     |   |        |        |        |      |      |
| HETATM | 403 | H60 | MYS | 3 | 24.401 | 13.386 | 16.884 | 1.00 | 0.00 |
| H      |     |     |     |   |        |        |        |      |      |
| HETATM | 404 | N4  | MYS | 3 | 21.382 | 18.025 | 19.702 | 1.00 | 0.00 |
| N      |     |     |     |   |        |        |        |      |      |
| HETATM | 405 | H61 | MYS | 3 | 21.031 | 18.679 | 19.017 | 1.00 | 0.00 |
| H      |     |     |     |   |        |        |        |      |      |
| HETATM | 406 | C34 | MYS | 3 | 20.565 | 18.110 | 20.794 | 1.00 | 0.00 |
| C      |     |     |     |   |        |        |        |      |      |
| HETATM | 407 | O8  | MYS | 3 | 20.806 | 17.557 | 21.859 | 1.00 | 0.00 |
| O      |     |     |     |   |        |        |        |      |      |
| HETATM | 408 | C35 | MYS | 3 | 19.259 | 18.850 | 20.660 | 1.00 | 0.00 |
| C      |     |     |     |   |        |        |        |      |      |
| HETATM | 409 | H62 | MYS | 3 | 19.059 | 18.868 | 19.588 | 1.00 | 0.00 |
| H      |     |     |     |   |        |        |        |      |      |
| HETATM | 410 | H63 | MYS | 3 | 18.510 | 18.330 | 21.257 | 1.00 | 0.00 |
| H      |     |     |     |   |        |        |        |      |      |
| HETATM | 411 | C36 | MYS | 3 | 19.315 | 20.327 | 21.136 | 1.00 | 0.00 |
| C      |     |     |     |   |        |        |        |      |      |
| HETATM | 412 | H64 | MYS | 3 | 19.536 | 20.394 | 22.201 | 1.00 | 0.00 |
| H      |     |     |     |   |        |        |        |      |      |
| HETATM | 413 | H65 | MYS | 3 | 20.060 | 20.893 | 20.576 | 1.00 | 0.00 |
| H      |     |     |     |   |        |        |        |      |      |
| HETATM | 414 | C37 | MYS | 3 | 17.984 | 20.987 | 20.800 | 1.00 | 0.00 |
| C      |     |     |     |   |        |        |        |      |      |
| HETATM | 415 | H66 | MYS | 3 | 17.860 | 21.063 | 19.720 | 1.00 | 0.00 |
| H      |     |     |     |   |        |        |        |      |      |
| HETATM | 416 | H67 | MYS | 3 | 17.155 | 20.390 | 21.180 | 1.00 | 0.00 |
| H      |     |     |     |   |        |        |        |      |      |
| HETATM | 417 | C38 | MYS | 3 | 18.058 | 22.463 | 21.387 | 1.00 | 0.00 |
| C      |     |     |     |   |        |        |        |      |      |
| HETATM | 418 | H68 | MYS | 3 | 18.923 | 22.947 | 20.934 | 1.00 | 0.00 |
| H      |     |     |     |   |        |        |        |      |      |
| HETATM | 419 | H69 | MYS | 3 | 18.179 | 22.340 | 22.463 | 1.00 | 0.00 |
| H      |     |     |     |   |        |        |        |      |      |

|        |     |     |     |   |        |        |        |      |      |
|--------|-----|-----|-----|---|--------|--------|--------|------|------|
| HETATM | 420 | C39 | MYS | 3 | 16.870 | 23.339 | 21.036 | 1.00 | 0.00 |
| C      |     |     |     |   |        |        |        |      |      |
| HETATM | 421 | H70 | MYS | 3 | 17.122 | 24.350 | 21.358 | 1.00 | 0.00 |
| H      |     |     |     |   |        |        |        |      |      |
| HETATM | 422 | H71 | MYS | 3 | 16.845 | 23.416 | 19.949 | 1.00 | 0.00 |
| H      |     |     |     |   |        |        |        |      |      |
| HETATM | 423 | C40 | MYS | 3 | 15.528 | 23.009 | 21.646 | 1.00 | 0.00 |
| C      |     |     |     |   |        |        |        |      |      |
| HETATM | 424 | H72 | MYS | 3 | 15.222 | 21.970 | 21.518 | 1.00 | 0.00 |
| H      |     |     |     |   |        |        |        |      |      |
| HETATM | 425 | H73 | MYS | 3 | 15.626 | 23.108 | 22.727 | 1.00 | 0.00 |
| H      |     |     |     |   |        |        |        |      |      |
| HETATM | 426 | C41 | MYS | 3 | 14.483 | 24.039 | 21.060 | 1.00 | 0.00 |
| C      |     |     |     |   |        |        |        |      |      |
| HETATM | 427 | H74 | MYS | 3 | 14.777 | 25.040 | 21.375 | 1.00 | 0.00 |
| H      |     |     |     |   |        |        |        |      |      |
| HETATM | 428 | H75 | MYS | 3 | 14.485 | 24.034 | 19.970 | 1.00 | 0.00 |
| H      |     |     |     |   |        |        |        |      |      |
| HETATM | 429 | C42 | MYS | 3 | 13.068 | 23.845 | 21.548 | 1.00 | 0.00 |
| C      |     |     |     |   |        |        |        |      |      |
| HETATM | 430 | H76 | MYS | 3 | 12.372 | 24.521 | 21.050 | 1.00 | 0.00 |
| H      |     |     |     |   |        |        |        |      |      |
| HETATM | 431 | H77 | MYS | 3 | 13.088 | 24.266 | 22.553 | 1.00 | 0.00 |
| H      |     |     |     |   |        |        |        |      |      |
| HETATM | 432 | C43 | MYS | 3 | 12.469 | 22.391 | 21.499 | 1.00 | 0.00 |
| C      |     |     |     |   |        |        |        |      |      |
| HETATM | 433 | H78 | MYS | 3 | 12.770 | 22.002 | 20.526 | 1.00 | 0.00 |
| H      |     |     |     |   |        |        |        |      |      |
| HETATM | 434 | H79 | MYS | 3 | 13.092 | 21.893 | 22.242 | 1.00 | 0.00 |
| H      |     |     |     |   |        |        |        |      |      |
| HETATM | 435 | C44 | MYS | 3 | 11.026 | 22.270 | 21.841 | 1.00 | 0.00 |
| C      |     |     |     |   |        |        |        |      |      |
| HETATM | 436 | H80 | MYS | 3 | 10.587 | 23.072 | 21.247 | 1.00 | 0.00 |
| H      |     |     |     |   |        |        |        |      |      |
| HETATM | 437 | H81 | MYS | 3 | 10.606 | 21.315 | 21.528 | 1.00 | 0.00 |
| H      |     |     |     |   |        |        |        |      |      |
| HETATM | 438 | C45 | MYS | 3 | 10.655 | 22.502 | 23.352 | 1.00 | 0.00 |
| C      |     |     |     |   |        |        |        |      |      |
| HETATM | 439 | H82 | MYS | 3 | 11.451 | 22.139 | 24.002 | 1.00 | 0.00 |
| H      |     |     |     |   |        |        |        |      |      |
| HETATM | 440 | H83 | MYS | 3 | 10.536 | 23.570 | 23.534 | 1.00 | 0.00 |
| H      |     |     |     |   |        |        |        |      |      |
| HETATM | 441 | C46 | MYS | 3 | 9.283  | 21.851 | 23.639 | 1.00 | 0.00 |
| C      |     |     |     |   |        |        |        |      |      |
| HETATM | 442 | H84 | MYS | 3 | 9.188  | 21.790 | 24.723 | 1.00 | 0.00 |
| H      |     |     |     |   |        |        |        |      |      |
| HETATM | 443 | H85 | MYS | 3 | 9.268  | 20.829 | 23.261 | 1.00 | 0.00 |
| H      |     |     |     |   |        |        |        |      |      |
| HETATM | 444 | C47 | MYS | 3 | 8.182  | 22.663 | 22.932 | 1.00 | 0.00 |
| C      |     |     |     |   |        |        |        |      |      |
| HETATM | 445 | H86 | MYS | 3 | 8.243  | 23.723 | 23.178 | 1.00 | 0.00 |
| H      |     |     |     |   |        |        |        |      |      |
| HETATM | 446 | H87 | MYS | 3 | 8.214  | 22.556 | 21.848 | 1.00 | 0.00 |
| H      |     |     |     |   |        |        |        |      |      |
| HETATM | 447 | C48 | MYS | 3 | 6.764  | 22.237 | 23.235 | 1.00 | 0.00 |
| C      |     |     |     |   |        |        |        |      |      |

|        |     |     |     |   |        |        |        |      |      |
|--------|-----|-----|-----|---|--------|--------|--------|------|------|
| HETATM | 448 | H88 | MYS | 3 | 6.145  | 22.639 | 22.433 | 1.00 | 0.00 |
| H      |     |     |     |   |        |        |        |      |      |
| HETATM | 449 | H89 | MYS | 3 | 6.765  | 21.148 | 23.184 | 1.00 | 0.00 |
| H      |     |     |     |   |        |        |        |      |      |
| HETATM | 450 | H90 | MYS | 3 | 6.480  | 22.524 | 24.248 | 1.00 | 0.00 |
| H      |     |     |     |   |        |        |        |      |      |
| HETATM | 451 | C1  | MYS | 4 | 28.409 | 23.465 | 20.984 | 1.00 | 0.00 |
| C      |     |     |     |   |        |        |        |      |      |
| HETATM | 452 | O1  | MYS | 4 | 28.334 | 24.627 | 20.607 | 1.00 | 0.00 |
| O      |     |     |     |   |        |        |        |      |      |
| HETATM | 453 | C2  | MYS | 4 | 27.547 | 22.338 | 20.289 | 1.00 | 0.00 |
| C      |     |     |     |   |        |        |        |      |      |
| HETATM | 454 | O2  | MYS | 4 | 27.519 | 21.133 | 20.654 | 1.00 | 0.00 |
| O      |     |     |     |   |        |        |        |      |      |
| HETATM | 455 | N1  | MYS | 4 | 29.141 | 22.983 | 22.042 | 1.00 | 0.00 |
| N      |     |     |     |   |        |        |        |      |      |
| HETATM | 456 | H1  | MYS | 4 | 29.068 | 21.989 | 22.205 | 1.00 | 0.00 |
| H      |     |     |     |   |        |        |        |      |      |
| HETATM | 457 | C3  | MYS | 4 | 29.991 | 23.766 | 22.893 | 1.00 | 0.00 |
| C      |     |     |     |   |        |        |        |      |      |
| HETATM | 458 | H2  | MYS | 4 | 30.281 | 24.734 | 22.485 | 1.00 | 0.00 |
| H      |     |     |     |   |        |        |        |      |      |
| HETATM | 459 | H3  | MYS | 4 | 30.988 | 23.370 | 23.085 | 1.00 | 0.00 |
| H      |     |     |     |   |        |        |        |      |      |
| HETATM | 460 | C4  | MYS | 4 | 29.340 | 23.823 | 24.249 | 1.00 | 0.00 |
| C      |     |     |     |   |        |        |        |      |      |
| HETATM | 461 | H4  | MYS | 4 | 29.110 | 22.818 | 24.602 | 1.00 | 0.00 |
| H      |     |     |     |   |        |        |        |      |      |
| HETATM | 462 | H5  | MYS | 4 | 28.406 | 24.386 | 24.237 | 1.00 | 0.00 |
| H      |     |     |     |   |        |        |        |      |      |
| HETATM | 463 | C5  | MYS | 4 | 30.257 | 24.561 | 25.262 | 1.00 | 0.00 |
| C      |     |     |     |   |        |        |        |      |      |
| HETATM | 464 | H6  | MYS | 4 | 30.466 | 25.583 | 24.948 | 1.00 | 0.00 |
| H      |     |     |     |   |        |        |        |      |      |
| HETATM | 465 | H7  | MYS | 4 | 31.206 | 24.032 | 25.349 | 1.00 | 0.00 |
| H      |     |     |     |   |        |        |        |      |      |
| HETATM | 466 | C6  | MYS | 4 | 29.623 | 24.609 | 26.602 | 1.00 | 0.00 |
| C      |     |     |     |   |        |        |        |      |      |
| HETATM | 467 | H8  | MYS | 4 | 29.367 | 23.611 | 26.958 | 1.00 | 0.00 |
| H      |     |     |     |   |        |        |        |      |      |
| HETATM | 468 | H9  | MYS | 4 | 28.641 | 25.051 | 26.433 | 1.00 | 0.00 |
| H      |     |     |     |   |        |        |        |      |      |
| HETATM | 469 | C7  | MYS | 4 | 30.310 | 25.428 | 27.715 | 1.00 | 0.00 |
| C      |     |     |     |   |        |        |        |      |      |
| HETATM | 470 | H10 | MYS | 4 | 31.362 | 25.144 | 27.731 | 1.00 | 0.00 |
| H      |     |     |     |   |        |        |        |      |      |
| HETATM | 471 | C8  | MYS | 4 | 30.300 | 26.915 | 27.487 | 1.00 | 0.00 |
| C      |     |     |     |   |        |        |        |      |      |
| HETATM | 472 | O3  | MYS | 4 | 29.330 | 27.417 | 26.883 | 1.00 | 0.00 |
| O      |     |     |     |   |        |        |        |      |      |
| HETATM | 473 | O4  | MYS | 4 | 31.386 | 27.582 | 27.794 | 1.00 | 0.00 |
| O      |     |     |     |   |        |        |        |      |      |
| HETATM | 474 | C9  | MYS | 4 | 31.455 | 29.044 | 27.739 | 1.00 | 0.00 |
| C      |     |     |     |   |        |        |        |      |      |
| HETATM | 475 | H11 | MYS | 4 | 31.037 | 29.365 | 26.785 | 1.00 | 0.00 |
| H      |     |     |     |   |        |        |        |      |      |

|        |     |     |     |   |        |        |        |      |      |
|--------|-----|-----|-----|---|--------|--------|--------|------|------|
| HETATM | 476 | H12 | MYS | 4 | 32.522 | 29.254 | 27.665 | 1.00 | 0.00 |
| H      |     |     |     |   |        |        |        |      |      |
| HETATM | 477 | C10 | MYS | 4 | 30.735 | 29.853 | 28.864 | 1.00 | 0.00 |
| C      |     |     |     |   |        |        |        |      |      |
| HETATM | 478 | H13 | MYS | 4 | 30.531 | 30.899 | 28.636 | 1.00 | 0.00 |
| H      |     |     |     |   |        |        |        |      |      |
| HETATM | 479 | H14 | MYS | 4 | 29.864 | 29.226 | 29.055 | 1.00 | 0.00 |
| H      |     |     |     |   |        |        |        |      |      |
| HETATM | 480 | H15 | MYS | 4 | 31.337 | 29.754 | 29.767 | 1.00 | 0.00 |
| H      |     |     |     |   |        |        |        |      |      |
| HETATM | 481 | N2  | MYS | 4 | 29.733 | 25.067 | 29.039 | 1.00 | 0.00 |
| N      |     |     |     |   |        |        |        |      |      |
| HETATM | 482 | H16 | MYS | 4 | 30.431 | 24.615 | 29.612 | 1.00 | 0.00 |
| H      |     |     |     |   |        |        |        |      |      |
| HETATM | 483 | C11 | MYS | 4 | 28.685 | 25.640 | 29.649 | 1.00 | 0.00 |
| C      |     |     |     |   |        |        |        |      |      |
| HETATM | 484 | O5  | MYS | 4 | 27.854 | 26.351 | 29.180 | 1.00 | 0.00 |
| O      |     |     |     |   |        |        |        |      |      |
| HETATM | 485 | C12 | MYS | 4 | 28.634 | 25.243 | 31.121 | 1.00 | 0.00 |
| C      |     |     |     |   |        |        |        |      |      |
| HETATM | 486 | H17 | MYS | 4 | 27.778 | 24.579 | 31.245 | 1.00 | 0.00 |
| H      |     |     |     |   |        |        |        |      |      |
| HETATM | 487 | H18 | MYS | 4 | 29.472 | 24.588 | 31.360 | 1.00 | 0.00 |
| H      |     |     |     |   |        |        |        |      |      |
| HETATM | 488 | C13 | MYS | 4 | 28.637 | 26.462 | 32.069 | 1.00 | 0.00 |
| C      |     |     |     |   |        |        |        |      |      |
| HETATM | 489 | H19 | MYS | 4 | 29.230 | 27.237 | 31.584 | 1.00 | 0.00 |
| H      |     |     |     |   |        |        |        |      |      |
| HETATM | 490 | H20 | MYS | 4 | 27.697 | 26.974 | 32.275 | 1.00 | 0.00 |
| H      |     |     |     |   |        |        |        |      |      |
| HETATM | 491 | C14 | MYS | 4 | 29.325 | 26.031 | 33.375 | 1.00 | 0.00 |
| C      |     |     |     |   |        |        |        |      |      |
| HETATM | 492 | H21 | MYS | 4 | 28.662 | 25.315 | 33.861 | 1.00 | 0.00 |
| H      |     |     |     |   |        |        |        |      |      |
| HETATM | 493 | H22 | MYS | 4 | 30.222 | 25.493 | 33.069 | 1.00 | 0.00 |
| H      |     |     |     |   |        |        |        |      |      |
| HETATM | 494 | C15 | MYS | 4 | 29.686 | 27.124 | 34.421 | 1.00 | 0.00 |
| C      |     |     |     |   |        |        |        |      |      |
| HETATM | 495 | H23 | MYS | 4 | 30.353 | 27.840 | 33.942 | 1.00 | 0.00 |
| H      |     |     |     |   |        |        |        |      |      |
| HETATM | 496 | H24 | MYS | 4 | 28.825 | 27.636 | 34.851 | 1.00 | 0.00 |
| H      |     |     |     |   |        |        |        |      |      |
| HETATM | 497 | C16 | MYS | 4 | 30.347 | 26.489 | 35.631 | 1.00 | 0.00 |
| C      |     |     |     |   |        |        |        |      |      |
| HETATM | 498 | H25 | MYS | 4 | 29.710 | 25.687 | 36.002 | 1.00 | 0.00 |
| H      |     |     |     |   |        |        |        |      |      |
| HETATM | 499 | H26 | MYS | 4 | 31.370 | 26.125 | 35.538 | 1.00 | 0.00 |
| H      |     |     |     |   |        |        |        |      |      |
| HETATM | 500 | C17 | MYS | 4 | 30.532 | 27.598 | 36.684 | 1.00 | 0.00 |
| C      |     |     |     |   |        |        |        |      |      |
| HETATM | 501 | H27 | MYS | 4 | 31.084 | 28.459 | 36.306 | 1.00 | 0.00 |
| H      |     |     |     |   |        |        |        |      |      |
| HETATM | 502 | H28 | MYS | 4 | 29.543 | 27.988 | 36.922 | 1.00 | 0.00 |
| H      |     |     |     |   |        |        |        |      |      |
| HETATM | 503 | C18 | MYS | 4 | 31.167 | 27.072 | 38.026 | 1.00 | 0.00 |
| C      |     |     |     |   |        |        |        |      |      |

|        |     |     |     |   |        |        |        |      |      |
|--------|-----|-----|-----|---|--------|--------|--------|------|------|
| HETATM | 504 | H29 | MYS | 4 | 30.492 | 26.286 | 38.366 | 1.00 | 0.00 |
| H      |     |     |     |   |        |        |        |      |      |
| HETATM | 505 | H30 | MYS | 4 | 32.165 | 26.667 | 37.857 | 1.00 | 0.00 |
| H      |     |     |     |   |        |        |        |      |      |
| HETATM | 506 | C19 | MYS | 4 | 31.157 | 28.235 | 39.135 | 1.00 | 0.00 |
| C      |     |     |     |   |        |        |        |      |      |
| HETATM | 507 | H31 | MYS | 4 | 30.254 | 28.847 | 39.144 | 1.00 | 0.00 |
| H      |     |     |     |   |        |        |        |      |      |
| HETATM | 508 | H32 | MYS | 4 | 31.890 | 29.019 | 38.948 | 1.00 | 0.00 |
| H      |     |     |     |   |        |        |        |      |      |
| HETATM | 509 | C20 | MYS | 4 | 31.477 | 27.649 | 40.455 | 1.00 | 0.00 |
| C      |     |     |     |   |        |        |        |      |      |
| HETATM | 510 | H33 | MYS | 4 | 30.629 | 27.047 | 40.781 | 1.00 | 0.00 |
| H      |     |     |     |   |        |        |        |      |      |
| HETATM | 511 | H34 | MYS | 4 | 32.301 | 26.936 | 40.420 | 1.00 | 0.00 |
| H      |     |     |     |   |        |        |        |      |      |
| HETATM | 512 | C21 | MYS | 4 | 31.793 | 28.588 | 41.604 | 1.00 | 0.00 |
| C      |     |     |     |   |        |        |        |      |      |
| HETATM | 513 | H35 | MYS | 4 | 32.116 | 27.940 | 42.419 | 1.00 | 0.00 |
| H      |     |     |     |   |        |        |        |      |      |
| HETATM | 514 | H36 | MYS | 4 | 32.589 | 29.216 | 41.203 | 1.00 | 0.00 |
| H      |     |     |     |   |        |        |        |      |      |
| HETATM | 515 | C22 | MYS | 4 | 30.531 | 29.420 | 42.172 | 1.00 | 0.00 |
| C      |     |     |     |   |        |        |        |      |      |
| HETATM | 516 | H37 | MYS | 4 | 30.172 | 29.957 | 41.294 | 1.00 | 0.00 |
| H      |     |     |     |   |        |        |        |      |      |
| HETATM | 517 | H38 | MYS | 4 | 29.766 | 28.752 | 42.568 | 1.00 | 0.00 |
| H      |     |     |     |   |        |        |        |      |      |
| HETATM | 518 | C23 | MYS | 4 | 31.130 | 30.377 | 43.305 | 1.00 | 0.00 |
| C      |     |     |     |   |        |        |        |      |      |
| HETATM | 519 | H39 | MYS | 4 | 31.560 | 29.855 | 44.160 | 1.00 | 0.00 |
| H      |     |     |     |   |        |        |        |      |      |
| HETATM | 520 | H40 | MYS | 4 | 31.935 | 31.029 | 42.965 | 1.00 | 0.00 |
| H      |     |     |     |   |        |        |        |      |      |
| HETATM | 521 | C24 | MYS | 4 | 30.096 | 31.340 | 43.897 | 1.00 | 0.00 |
| C      |     |     |     |   |        |        |        |      |      |
| HETATM | 522 | H41 | MYS | 4 | 29.189 | 30.874 | 44.282 | 1.00 | 0.00 |
| H      |     |     |     |   |        |        |        |      |      |
| HETATM | 523 | H42 | MYS | 4 | 29.915 | 32.111 | 43.148 | 1.00 | 0.00 |
| H      |     |     |     |   |        |        |        |      |      |
| HETATM | 524 | C25 | MYS | 4 | 30.763 | 32.181 | 45.041 | 1.00 | 0.00 |
| C      |     |     |     |   |        |        |        |      |      |
| HETATM | 525 | H43 | MYS | 4 | 29.961 | 32.732 | 45.533 | 1.00 | 0.00 |
| H      |     |     |     |   |        |        |        |      |      |
| HETATM | 526 | H44 | MYS | 4 | 31.156 | 31.551 | 45.839 | 1.00 | 0.00 |
| H      |     |     |     |   |        |        |        |      |      |
| HETATM | 527 | H45 | MYS | 4 | 31.521 | 32.798 | 44.559 | 1.00 | 0.00 |
| H      |     |     |     |   |        |        |        |      |      |
| HETATM | 528 | N3  | MYS | 4 | 26.888 | 22.815 | 19.182 | 1.00 | 0.00 |
| N      |     |     |     |   |        |        |        |      |      |
| HETATM | 529 | H46 | MYS | 4 | 27.050 | 23.792 | 18.985 | 1.00 | 0.00 |
| H      |     |     |     |   |        |        |        |      |      |
| HETATM | 530 | C26 | MYS | 4 | 26.026 | 21.990 | 18.386 | 1.00 | 0.00 |
| C      |     |     |     |   |        |        |        |      |      |
| HETATM | 531 | H47 | MYS | 4 | 25.975 | 20.965 | 18.753 | 1.00 | 0.00 |
| H      |     |     |     |   |        |        |        |      |      |

|        |     |     |     |   |        |        |        |      |      |
|--------|-----|-----|-----|---|--------|--------|--------|------|------|
| HETATM | 532 | H48 | MYS | 4 | 26.412 | 21.902 | 17.371 | 1.00 | 0.00 |
| H      |     |     |     |   |        |        |        |      |      |
| HETATM | 533 | C27 | MYS | 4 | 24.660 | 22.553 | 18.313 | 1.00 | 0.00 |
| C      |     |     |     |   |        |        |        |      |      |
| HETATM | 534 | H49 | MYS | 4 | 24.814 | 23.630 | 18.252 | 1.00 | 0.00 |
| H      |     |     |     |   |        |        |        |      |      |
| HETATM | 535 | H50 | MYS | 4 | 24.122 | 22.352 | 19.239 | 1.00 | 0.00 |
| H      |     |     |     |   |        |        |        |      |      |
| HETATM | 536 | C28 | MYS | 4 | 23.927 | 21.942 | 17.080 | 1.00 | 0.00 |
| C      |     |     |     |   |        |        |        |      |      |
| HETATM | 537 | H51 | MYS | 4 | 24.512 | 22.119 | 16.178 | 1.00 | 0.00 |
| H      |     |     |     |   |        |        |        |      |      |
| HETATM | 538 | H52 | MYS | 4 | 22.965 | 22.432 | 16.922 | 1.00 | 0.00 |
| H      |     |     |     |   |        |        |        |      |      |
| HETATM | 539 | C29 | MYS | 4 | 23.688 | 20.424 | 17.124 | 1.00 | 0.00 |
| C      |     |     |     |   |        |        |        |      |      |
| HETATM | 540 | H53 | MYS | 4 | 23.039 | 20.274 | 17.987 | 1.00 | 0.00 |
| H      |     |     |     |   |        |        |        |      |      |
| HETATM | 541 | H54 | MYS | 4 | 24.606 | 19.840 | 17.190 | 1.00 | 0.00 |
| H      |     |     |     |   |        |        |        |      |      |
| HETATM | 542 | C30 | MYS | 4 | 22.900 | 19.917 | 15.937 | 1.00 | 0.00 |
| C      |     |     |     |   |        |        |        |      |      |
| HETATM | 543 | H55 | MYS | 4 | 23.502 | 20.167 | 15.064 | 1.00 | 0.00 |
| H      |     |     |     |   |        |        |        |      |      |
| HETATM | 544 | C31 | MYS | 4 | 22.851 | 18.376 | 15.849 | 1.00 | 0.00 |
| C      |     |     |     |   |        |        |        |      |      |
| HETATM | 545 | O6  | MYS | 4 | 21.789 | 17.754 | 15.841 | 1.00 | 0.00 |
| O      |     |     |     |   |        |        |        |      |      |
| HETATM | 546 | O7  | MYS | 4 | 24.014 | 17.732 | 15.769 | 1.00 | 0.00 |
| O      |     |     |     |   |        |        |        |      |      |
| HETATM | 547 | C32 | MYS | 4 | 24.088 | 16.361 | 15.738 | 1.00 | 0.00 |
| C      |     |     |     |   |        |        |        |      |      |
| HETATM | 548 | H56 | MYS | 4 | 23.896 | 16.014 | 14.723 | 1.00 | 0.00 |
| H      |     |     |     |   |        |        |        |      |      |
| HETATM | 549 | H57 | MYS | 4 | 23.470 | 15.768 | 16.412 | 1.00 | 0.00 |
| H      |     |     |     |   |        |        |        |      |      |
| HETATM | 550 | C33 | MYS | 4 | 25.606 | 16.126 | 15.904 | 1.00 | 0.00 |
| C      |     |     |     |   |        |        |        |      |      |
| HETATM | 551 | H58 | MYS | 4 | 25.883 | 16.505 | 16.888 | 1.00 | 0.00 |
| H      |     |     |     |   |        |        |        |      |      |
| HETATM | 552 | H59 | MYS | 4 | 25.763 | 15.048 | 15.917 | 1.00 | 0.00 |
| H      |     |     |     |   |        |        |        |      |      |
| HETATM | 553 | H60 | MYS | 4 | 26.115 | 16.747 | 15.167 | 1.00 | 0.00 |
| H      |     |     |     |   |        |        |        |      |      |
| HETATM | 554 | N4  | MYS | 4 | 21.664 | 20.555 | 15.795 | 1.00 | 0.00 |
| N      |     |     |     |   |        |        |        |      |      |
| HETATM | 555 | H61 | MYS | 4 | 21.562 | 21.137 | 14.975 | 1.00 | 0.00 |
| H      |     |     |     |   |        |        |        |      |      |
| HETATM | 556 | C34 | MYS | 4 | 20.607 | 20.497 | 16.649 | 1.00 | 0.00 |
| C      |     |     |     |   |        |        |        |      |      |
| HETATM | 557 | O8  | MYS | 4 | 20.654 | 19.898 | 17.708 | 1.00 | 0.00 |
| O      |     |     |     |   |        |        |        |      |      |
| HETATM | 558 | C35 | MYS | 4 | 19.386 | 21.319 | 16.393 | 1.00 | 0.00 |
| C      |     |     |     |   |        |        |        |      |      |
| HETATM | 559 | H62 | MYS | 4 | 19.391 | 21.660 | 15.358 | 1.00 | 0.00 |
| H      |     |     |     |   |        |        |        |      |      |

|        |     |     |     |   |        |        |        |      |      |
|--------|-----|-----|-----|---|--------|--------|--------|------|------|
| HETATM | 560 | H63 | MYS | 4 | 18.522 | 20.698 | 16.629 | 1.00 | 0.00 |
| H      |     |     |     |   |        |        |        |      |      |
| HETATM | 561 | C36 | MYS | 4 | 19.371 | 22.560 | 17.268 | 1.00 | 0.00 |
| C      |     |     |     |   |        |        |        |      |      |
| HETATM | 562 | H64 | MYS | 4 | 19.469 | 22.422 | 18.345 | 1.00 | 0.00 |
| H      |     |     |     |   |        |        |        |      |      |
| HETATM | 563 | H65 | MYS | 4 | 20.161 | 23.254 | 16.983 | 1.00 | 0.00 |
| H      |     |     |     |   |        |        |        |      |      |
| HETATM | 564 | C37 | MYS | 4 | 18.009 | 23.320 | 16.970 | 1.00 | 0.00 |
| C      |     |     |     |   |        |        |        |      |      |
| HETATM | 565 | H66 | MYS | 4 | 17.862 | 23.283 | 15.890 | 1.00 | 0.00 |
| H      |     |     |     |   |        |        |        |      |      |
| HETATM | 566 | H67 | MYS | 4 | 17.181 | 22.860 | 17.510 | 1.00 | 0.00 |
| H      |     |     |     |   |        |        |        |      |      |
| HETATM | 567 | C38 | MYS | 4 | 18.213 | 24.786 | 17.446 | 1.00 | 0.00 |
| C      |     |     |     |   |        |        |        |      |      |
| HETATM | 568 | H68 | MYS | 4 | 18.921 | 25.289 | 16.788 | 1.00 | 0.00 |
| H      |     |     |     |   |        |        |        |      |      |
| HETATM | 569 | H69 | MYS | 4 | 18.762 | 24.835 | 18.386 | 1.00 | 0.00 |
| H      |     |     |     |   |        |        |        |      |      |
| HETATM | 570 | C39 | MYS | 4 | 16.908 | 25.560 | 17.613 | 1.00 | 0.00 |
| C      |     |     |     |   |        |        |        |      |      |
| HETATM | 571 | H70 | MYS | 4 | 16.438 | 25.850 | 16.674 | 1.00 | 0.00 |
| H      |     |     |     |   |        |        |        |      |      |
| HETATM | 572 | H71 | MYS | 4 | 16.041 | 25.084 | 18.071 | 1.00 | 0.00 |
| H      |     |     |     |   |        |        |        |      |      |
| HETATM | 573 | C40 | MYS | 4 | 17.153 | 26.891 | 18.368 | 1.00 | 0.00 |
| C      |     |     |     |   |        |        |        |      |      |
| HETATM | 574 | H72 | MYS | 4 | 17.430 | 26.624 | 19.388 | 1.00 | 0.00 |
| H      |     |     |     |   |        |        |        |      |      |
| HETATM | 575 | H73 | MYS | 4 | 17.872 | 27.510 | 17.831 | 1.00 | 0.00 |
| H      |     |     |     |   |        |        |        |      |      |
| HETATM | 576 | C41 | MYS | 4 | 15.814 | 27.714 | 18.387 | 1.00 | 0.00 |
| C      |     |     |     |   |        |        |        |      |      |
| HETATM | 577 | H74 | MYS | 4 | 16.042 | 28.640 | 18.914 | 1.00 | 0.00 |
| H      |     |     |     |   |        |        |        |      |      |
| HETATM | 578 | H75 | MYS | 4 | 15.454 | 27.871 | 17.370 | 1.00 | 0.00 |
| H      |     |     |     |   |        |        |        |      |      |
| HETATM | 579 | C42 | MYS | 4 | 14.636 | 27.172 | 19.150 | 1.00 | 0.00 |
| C      |     |     |     |   |        |        |        |      |      |
| HETATM | 580 | H76 | MYS | 4 | 14.957 | 27.058 | 20.185 | 1.00 | 0.00 |
| H      |     |     |     |   |        |        |        |      |      |
| HETATM | 581 | H77 | MYS | 4 | 14.262 | 26.318 | 18.586 | 1.00 | 0.00 |
| H      |     |     |     |   |        |        |        |      |      |
| HETATM | 582 | C43 | MYS | 4 | 13.469 | 28.217 | 19.216 | 1.00 | 0.00 |
| C      |     |     |     |   |        |        |        |      |      |
| HETATM | 583 | H78 | MYS | 4 | 13.796 | 29.083 | 19.792 | 1.00 | 0.00 |
| H      |     |     |     |   |        |        |        |      |      |
| HETATM | 584 | H79 | MYS | 4 | 13.123 | 28.584 | 18.250 | 1.00 | 0.00 |
| H      |     |     |     |   |        |        |        |      |      |
| HETATM | 585 | C44 | MYS | 4 | 12.234 | 27.559 | 19.958 | 1.00 | 0.00 |
| C      |     |     |     |   |        |        |        |      |      |
| HETATM | 586 | H80 | MYS | 4 | 11.812 | 26.777 | 19.326 | 1.00 | 0.00 |
| H      |     |     |     |   |        |        |        |      |      |
| HETATM | 587 | H81 | MYS | 4 | 12.585 | 27.068 | 20.866 | 1.00 | 0.00 |
| H      |     |     |     |   |        |        |        |      |      |



|        |     |     |     |   |        |        |        |      |      |
|--------|-----|-----|-----|---|--------|--------|--------|------|------|
| HETATM | 588 | C45 | MYS | 4 | 11.203 | 28.568 | 20.333 | 1.00 | 0.00 |
| C      |     |     |     |   |        |        |        |      |      |
| HETATM | 589 | H82 | MYS | 4 | 11.684 | 29.356 | 20.912 | 1.00 | 0.00 |
| H      |     |     |     |   |        |        |        |      |      |
| HETATM | 590 | H83 | MYS | 4 | 10.795 | 28.984 | 19.412 | 1.00 | 0.00 |
| H      |     |     |     |   |        |        |        |      |      |
| HETATM | 591 | C46 | MYS | 4 | 10.093 | 27.854 | 21.128 | 1.00 | 0.00 |
| C      |     |     |     |   |        |        |        |      |      |
| HETATM | 592 | H84 | MYS | 4 | 9.819  | 26.924 | 20.631 | 1.00 | 0.00 |
| H      |     |     |     |   |        |        |        |      |      |
| HETATM | 593 | H85 | MYS | 4 | 9.187  | 28.460 | 21.135 | 1.00 | 0.00 |
| H      |     |     |     |   |        |        |        |      |      |
| HETATM | 594 | C47 | MYS | 4 | 10.576 | 27.578 | 22.606 | 1.00 | 0.00 |
| C      |     |     |     |   |        |        |        |      |      |
| HETATM | 595 | H86 | MYS | 4 | 11.494 | 26.995 | 22.540 | 1.00 | 0.00 |
| H      |     |     |     |   |        |        |        |      |      |
| HETATM | 596 | H87 | MYS | 4 | 10.671 | 28.444 | 23.262 | 1.00 | 0.00 |
| H      |     |     |     |   |        |        |        |      |      |
| HETATM | 597 | C48 | MYS | 4 | 9.543  | 26.696 | 23.314 | 1.00 | 0.00 |
| C      |     |     |     |   |        |        |        |      |      |
| HETATM | 598 | H88 | MYS | 4 | 8.617  | 27.244 | 23.485 | 1.00 | 0.00 |
| H      |     |     |     |   |        |        |        |      |      |
| HETATM | 599 | H89 | MYS | 4 | 9.377  | 25.822 | 22.683 | 1.00 | 0.00 |
| H      |     |     |     |   |        |        |        |      |      |
| HETATM | 600 | H90 | MYS | 4 | 9.938  | 26.277 | 24.239 | 1.00 | 0.00 |
| H      |     |     |     |   |        |        |        |      |      |
| HETATM | 601 | C1  | MYS | 5 | 26.996 | 27.742 | 18.774 | 1.00 | 0.00 |
| C      |     |     |     |   |        |        |        |      |      |
| HETATM | 602 | O1  | MYS | 5 | 26.571 | 28.909 | 18.496 | 1.00 | 0.00 |
| O      |     |     |     |   |        |        |        |      |      |
| HETATM | 603 | C2  | MYS | 5 | 27.084 | 26.666 | 17.714 | 1.00 | 0.00 |
| C      |     |     |     |   |        |        |        |      |      |
| HETATM | 604 | O2  | MYS | 5 | 27.526 | 25.492 | 17.920 | 1.00 | 0.00 |
| O      |     |     |     |   |        |        |        |      |      |
| HETATM | 605 | N1  | MYS | 5 | 27.423 | 27.371 | 19.971 | 1.00 | 0.00 |
| N      |     |     |     |   |        |        |        |      |      |
| HETATM | 606 | H1  | MYS | 5 | 27.788 | 26.431 | 20.025 | 1.00 | 0.00 |
| H      |     |     |     |   |        |        |        |      |      |
| HETATM | 607 | C3  | MYS | 5 | 27.660 | 28.452 | 20.956 | 1.00 | 0.00 |
| C      |     |     |     |   |        |        |        |      |      |
| HETATM | 608 | H2  | MYS | 5 | 26.822 | 28.540 | 21.647 | 1.00 | 0.00 |
| H      |     |     |     |   |        |        |        |      |      |
| HETATM | 609 | H3  | MYS | 5 | 27.682 | 29.469 | 20.565 | 1.00 | 0.00 |
| H      |     |     |     |   |        |        |        |      |      |
| HETATM | 610 | C4  | MYS | 5 | 29.079 | 28.297 | 21.606 | 1.00 | 0.00 |
| C      |     |     |     |   |        |        |        |      |      |
| HETATM | 611 | H4  | MYS | 5 | 29.839 | 28.397 | 20.832 | 1.00 | 0.00 |
| H      |     |     |     |   |        |        |        |      |      |
| HETATM | 612 | H5  | MYS | 5 | 29.065 | 27.292 | 22.028 | 1.00 | 0.00 |
| H      |     |     |     |   |        |        |        |      |      |
| HETATM | 613 | C5  | MYS | 5 | 29.299 | 29.441 | 22.575 | 1.00 | 0.00 |
| C      |     |     |     |   |        |        |        |      |      |
| HETATM | 614 | H6  | MYS | 5 | 29.163 | 30.387 | 22.051 | 1.00 | 0.00 |
| H      |     |     |     |   |        |        |        |      |      |
| HETATM | 615 | H7  | MYS | 5 | 30.318 | 29.376 | 22.957 | 1.00 | 0.00 |
| H      |     |     |     |   |        |        |        |      |      |

|        |     |     |     |   |        |        |        |      |      |
|--------|-----|-----|-----|---|--------|--------|--------|------|------|
| HETATM | 616 | C6  | MYS | 5 | 28.461 | 29.171 | 23.861 | 1.00 | 0.00 |
| C      |     |     |     |   |        |        |        |      |      |
| HETATM | 617 | H8  | MYS | 5 | 28.606 | 28.210 | 24.354 | 1.00 | 0.00 |
| H      |     |     |     |   |        |        |        |      |      |
| HETATM | 618 | H9  | MYS | 5 | 27.417 | 29.305 | 23.577 | 1.00 | 0.00 |
| H      |     |     |     |   |        |        |        |      |      |
| HETATM | 619 | C7  | MYS | 5 | 28.553 | 30.351 | 24.877 | 1.00 | 0.00 |
| C      |     |     |     |   |        |        |        |      |      |
| HETATM | 620 | H10 | MYS | 5 | 29.627 | 30.537 | 24.906 | 1.00 | 0.00 |
| H      |     |     |     |   |        |        |        |      |      |
| HETATM | 621 | C8  | MYS | 5 | 27.798 | 31.677 | 24.526 | 1.00 | 0.00 |
| C      |     |     |     |   |        |        |        |      |      |
| HETATM | 622 | O3  | MYS | 5 | 27.212 | 31.811 | 23.461 | 1.00 | 0.00 |
| O      |     |     |     |   |        |        |        |      |      |
| HETATM | 623 | O4  | MYS | 5 | 28.103 | 32.688 | 25.318 | 1.00 | 0.00 |
| O      |     |     |     |   |        |        |        |      |      |
| HETATM | 624 | C9  | MYS | 5 | 27.608 | 33.926 | 25.119 | 1.00 | 0.00 |
| C      |     |     |     |   |        |        |        |      |      |
| HETATM | 625 | H11 | MYS | 5 | 27.592 | 34.238 | 24.074 | 1.00 | 0.00 |
| H      |     |     |     |   |        |        |        |      |      |
| HETATM | 626 | H12 | MYS | 5 | 28.294 | 34.655 | 25.550 | 1.00 | 0.00 |
| H      |     |     |     |   |        |        |        |      |      |
| HETATM | 627 | C10 | MYS | 5 | 26.286 | 34.043 | 25.928 | 1.00 | 0.00 |
| C      |     |     |     |   |        |        |        |      |      |
| HETATM | 628 | H13 | MYS | 5 | 26.537 | 33.644 | 26.910 | 1.00 | 0.00 |
| H      |     |     |     |   |        |        |        |      |      |
| HETATM | 629 | H14 | MYS | 5 | 25.911 | 35.060 | 26.035 | 1.00 | 0.00 |
| H      |     |     |     |   |        |        |        |      |      |
| HETATM | 630 | H15 | MYS | 5 | 25.457 | 33.408 | 25.615 | 1.00 | 0.00 |
| H      |     |     |     |   |        |        |        |      |      |
| HETATM | 631 | N2  | MYS | 5 | 28.169 | 29.814 | 26.131 | 1.00 | 0.00 |
| N      |     |     |     |   |        |        |        |      |      |
| HETATM | 632 | H16 | MYS | 5 | 28.918 | 29.432 | 26.691 | 1.00 | 0.00 |
| H      |     |     |     |   |        |        |        |      |      |
| HETATM | 633 | C11 | MYS | 5 | 26.953 | 29.764 | 26.605 | 1.00 | 0.00 |
| C      |     |     |     |   |        |        |        |      |      |
| HETATM | 634 | O5  | MYS | 5 | 25.954 | 29.879 | 25.879 | 1.00 | 0.00 |
| O      |     |     |     |   |        |        |        |      |      |
| HETATM | 635 | C12 | MYS | 5 | 26.750 | 29.221 | 28.014 | 1.00 | 0.00 |
| C      |     |     |     |   |        |        |        |      |      |
| HETATM | 636 | H17 | MYS | 5 | 25.838 | 28.632 | 28.115 | 1.00 | 0.00 |
| H      |     |     |     |   |        |        |        |      |      |
| HETATM | 637 | H18 | MYS | 5 | 27.587 | 28.574 | 28.280 | 1.00 | 0.00 |
| H      |     |     |     |   |        |        |        |      |      |
| HETATM | 638 | C13 | MYS | 5 | 26.762 | 30.343 | 29.059 | 1.00 | 0.00 |
| C      |     |     |     |   |        |        |        |      |      |
| HETATM | 639 | H19 | MYS | 5 | 27.791 | 30.700 | 29.091 | 1.00 | 0.00 |
| H      |     |     |     |   |        |        |        |      |      |
| HETATM | 640 | H20 | MYS | 5 | 26.046 | 31.136 | 28.842 | 1.00 | 0.00 |
| H      |     |     |     |   |        |        |        |      |      |
| HETATM | 641 | C14 | MYS | 5 | 26.451 | 29.718 | 30.408 | 1.00 | 0.00 |
| C      |     |     |     |   |        |        |        |      |      |
| HETATM | 642 | H21 | MYS | 5 | 25.367 | 29.659 | 30.507 | 1.00 | 0.00 |
| H      |     |     |     |   |        |        |        |      |      |
| HETATM | 643 | H22 | MYS | 5 | 26.759 | 28.681 | 30.538 | 1.00 | 0.00 |
| H      |     |     |     |   |        |        |        |      |      |

|        |     |     |     |   |        |        |        |      |      |
|--------|-----|-----|-----|---|--------|--------|--------|------|------|
| HETATM | 644 | C15 | MYS | 5 | 27.055 | 30.552 | 31.562 | 1.00 | 0.00 |
| C      |     |     |     |   |        |        |        |      |      |
| HETATM | 645 | H23 | MYS | 5 | 28.135 | 30.536 | 31.418 | 1.00 | 0.00 |
| H      |     |     |     |   |        |        |        |      |      |
| HETATM | 646 | H24 | MYS | 5 | 26.803 | 31.611 | 31.502 | 1.00 | 0.00 |
| H      |     |     |     |   |        |        |        |      |      |
| HETATM | 647 | C16 | MYS | 5 | 26.569 | 29.943 | 32.906 | 1.00 | 0.00 |
| C      |     |     |     |   |        |        |        |      |      |
| HETATM | 648 | H25 | MYS | 5 | 25.677 | 29.316 | 32.929 | 1.00 | 0.00 |
| H      |     |     |     |   |        |        |        |      |      |
| HETATM | 649 | H26 | MYS | 5 | 27.415 | 29.377 | 33.293 | 1.00 | 0.00 |
| H      |     |     |     |   |        |        |        |      |      |
| HETATM | 650 | C17 | MYS | 5 | 26.181 | 31.099 | 33.817 | 1.00 | 0.00 |
| C      |     |     |     |   |        |        |        |      |      |
| HETATM | 651 | H27 | MYS | 5 | 26.996 | 31.801 | 33.997 | 1.00 | 0.00 |
| H      |     |     |     |   |        |        |        |      |      |
| HETATM | 652 | H28 | MYS | 5 | 25.309 | 31.614 | 33.415 | 1.00 | 0.00 |
| H      |     |     |     |   |        |        |        |      |      |
| HETATM | 653 | C18 | MYS | 5 | 25.784 | 30.548 | 35.139 | 1.00 | 0.00 |
| C      |     |     |     |   |        |        |        |      |      |
| HETATM | 654 | H29 | MYS | 5 | 25.376 | 31.403 | 35.678 | 1.00 | 0.00 |
| H      |     |     |     |   |        |        |        |      |      |
| HETATM | 655 | H30 | MYS | 5 | 24.931 | 29.890 | 34.968 | 1.00 | 0.00 |
| H      |     |     |     |   |        |        |        |      |      |
| HETATM | 656 | C19 | MYS | 5 | 26.873 | 29.840 | 35.935 | 1.00 | 0.00 |
| C      |     |     |     |   |        |        |        |      |      |
| HETATM | 657 | H31 | MYS | 5 | 27.812 | 30.380 | 36.062 | 1.00 | 0.00 |
| H      |     |     |     |   |        |        |        |      |      |
| HETATM | 658 | H32 | MYS | 5 | 27.272 | 28.904 | 35.544 | 1.00 | 0.00 |
| H      |     |     |     |   |        |        |        |      |      |
| HETATM | 659 | C20 | MYS | 5 | 26.326 | 29.493 | 37.344 | 1.00 | 0.00 |
| C      |     |     |     |   |        |        |        |      |      |
| HETATM | 660 | H33 | MYS | 5 | 25.258 | 29.277 | 37.323 | 1.00 | 0.00 |
| H      |     |     |     |   |        |        |        |      |      |
| HETATM | 661 | H34 | MYS | 5 | 26.683 | 28.562 | 37.785 | 1.00 | 0.00 |
| H      |     |     |     |   |        |        |        |      |      |
| HETATM | 662 | C21 | MYS | 5 | 26.662 | 30.663 | 38.341 | 1.00 | 0.00 |
| C      |     |     |     |   |        |        |        |      |      |
| HETATM | 663 | H35 | MYS | 5 | 27.750 | 30.607 | 38.389 | 1.00 | 0.00 |
| H      |     |     |     |   |        |        |        |      |      |
| HETATM | 664 | H36 | MYS | 5 | 26.571 | 31.696 | 38.007 | 1.00 | 0.00 |
| H      |     |     |     |   |        |        |        |      |      |
| HETATM | 665 | C22 | MYS | 5 | 26.177 | 30.514 | 39.682 | 1.00 | 0.00 |
| C      |     |     |     |   |        |        |        |      |      |
| HETATM | 666 | H37 | MYS | 5 | 25.093 | 30.410 | 39.720 | 1.00 | 0.00 |
| H      |     |     |     |   |        |        |        |      |      |
| HETATM | 667 | H38 | MYS | 5 | 26.569 | 29.552 | 40.009 | 1.00 | 0.00 |
| H      |     |     |     |   |        |        |        |      |      |
| HETATM | 668 | C23 | MYS | 5 | 26.790 | 31.559 | 40.639 | 1.00 | 0.00 |
| C      |     |     |     |   |        |        |        |      |      |
| HETATM | 669 | H39 | MYS | 5 | 27.860 | 31.704 | 40.492 | 1.00 | 0.00 |
| H      |     |     |     |   |        |        |        |      |      |
| HETATM | 670 | H40 | MYS | 5 | 26.341 | 32.507 | 40.341 | 1.00 | 0.00 |
| H      |     |     |     |   |        |        |        |      |      |
| HETATM | 671 | C24 | MYS | 5 | 26.567 | 31.182 | 42.104 | 1.00 | 0.00 |
| C      |     |     |     |   |        |        |        |      |      |

|        |     |     |     |   |        |        |        |      |      |
|--------|-----|-----|-----|---|--------|--------|--------|------|------|
| HETATM | 672 | H41 | MYS | 5 | 26.824 | 32.043 | 42.720 | 1.00 | 0.00 |
| H      |     |     |     |   |        |        |        |      |      |
| HETATM | 673 | H42 | MYS | 5 | 27.131 | 30.389 | 42.595 | 1.00 | 0.00 |
| H      |     |     |     |   |        |        |        |      |      |
| HETATM | 674 | C25 | MYS | 5 | 25.068 | 30.889 | 42.303 | 1.00 | 0.00 |
| C      |     |     |     |   |        |        |        |      |      |
| HETATM | 675 | H43 | MYS | 5 | 24.865 | 29.902 | 41.887 | 1.00 | 0.00 |
| H      |     |     |     |   |        |        |        |      |      |
| HETATM | 676 | H44 | MYS | 5 | 24.870 | 30.776 | 43.369 | 1.00 | 0.00 |
| H      |     |     |     |   |        |        |        |      |      |
| HETATM | 677 | H45 | MYS | 5 | 24.433 | 31.670 | 41.886 | 1.00 | 0.00 |
| H      |     |     |     |   |        |        |        |      |      |
| HETATM | 678 | N3  | MYS | 5 | 26.690 | 27.105 | 16.481 | 1.00 | 0.00 |
| N      |     |     |     |   |        |        |        |      |      |
| HETATM | 679 | H46 | MYS | 5 | 26.279 | 28.025 | 16.404 | 1.00 | 0.00 |
| H      |     |     |     |   |        |        |        |      |      |
| HETATM | 680 | C26 | MYS | 5 | 26.648 | 26.153 | 15.337 | 1.00 | 0.00 |
| C      |     |     |     |   |        |        |        |      |      |
| HETATM | 681 | H47 | MYS | 5 | 27.212 | 25.235 | 15.501 | 1.00 | 0.00 |
| H      |     |     |     |   |        |        |        |      |      |
| HETATM | 682 | H48 | MYS | 5 | 27.110 | 26.602 | 14.458 | 1.00 | 0.00 |
| H      |     |     |     |   |        |        |        |      |      |
| HETATM | 683 | C27 | MYS | 5 | 25.197 | 25.807 | 15.065 | 1.00 | 0.00 |
| C      |     |     |     |   |        |        |        |      |      |
| HETATM | 684 | H49 | MYS | 5 | 24.651 | 26.749 | 15.103 | 1.00 | 0.00 |
| H      |     |     |     |   |        |        |        |      |      |
| HETATM | 685 | H50 | MYS | 5 | 24.764 | 25.211 | 15.868 | 1.00 | 0.00 |
| H      |     |     |     |   |        |        |        |      |      |
| HETATM | 686 | C28 | MYS | 5 | 24.997 | 25.131 | 13.688 | 1.00 | 0.00 |
| C      |     |     |     |   |        |        |        |      |      |
| HETATM | 687 | H51 | MYS | 5 | 25.644 | 24.258 | 13.593 | 1.00 | 0.00 |
| H      |     |     |     |   |        |        |        |      |      |
| HETATM | 688 | H52 | MYS | 5 | 25.285 | 25.757 | 12.843 | 1.00 | 0.00 |
| H      |     |     |     |   |        |        |        |      |      |
| HETATM | 689 | C29 | MYS | 5 | 23.491 | 24.844 | 13.588 | 1.00 | 0.00 |
| C      |     |     |     |   |        |        |        |      |      |
| HETATM | 690 | H53 | MYS | 5 | 22.943 | 25.734 | 13.898 | 1.00 | 0.00 |
| H      |     |     |     |   |        |        |        |      |      |
| HETATM | 691 | H54 | MYS | 5 | 23.137 | 24.181 | 14.377 | 1.00 | 0.00 |
| H      |     |     |     |   |        |        |        |      |      |
| HETATM | 692 | C30 | MYS | 5 | 23.072 | 24.190 | 12.216 | 1.00 | 0.00 |
| C      |     |     |     |   |        |        |        |      |      |
| HETATM | 693 | H55 | MYS | 5 | 23.509 | 24.948 | 11.565 | 1.00 | 0.00 |
| H      |     |     |     |   |        |        |        |      |      |
| HETATM | 694 | C31 | MYS | 5 | 23.779 | 22.797 | 11.962 | 1.00 | 0.00 |
| C      |     |     |     |   |        |        |        |      |      |
| HETATM | 695 | O6  | MYS | 5 | 23.974 | 22.085 | 12.960 | 1.00 | 0.00 |
| O      |     |     |     |   |        |        |        |      |      |
| HETATM | 696 | O7  | MYS | 5 | 24.148 | 22.518 | 10.701 | 1.00 | 0.00 |
| O      |     |     |     |   |        |        |        |      |      |
| HETATM | 697 | C32 | MYS | 5 | 24.710 | 21.309 | 10.280 | 1.00 | 0.00 |
| C      |     |     |     |   |        |        |        |      |      |
| HETATM | 698 | H56 | MYS | 5 | 24.103 | 20.421 | 10.457 | 1.00 | 0.00 |
| H      |     |     |     |   |        |        |        |      |      |
| HETATM | 699 | H57 | MYS | 5 | 25.690 | 21.236 | 10.752 | 1.00 | 0.00 |
| H      |     |     |     |   |        |        |        |      |      |

|        |     |     |     |   |        |        |        |      |      |
|--------|-----|-----|-----|---|--------|--------|--------|------|------|
| HETATM | 700 | C33 | MYS | 5 | 25.065 | 21.523 | 8.806  | 1.00 | 0.00 |
| C      |     |     |     |   |        |        |        |      |      |
| HETATM | 701 | H58 | MYS | 5 | 25.905 | 22.217 | 8.758  | 1.00 | 0.00 |
| H      |     |     |     |   |        |        |        |      |      |
| HETATM | 702 | H59 | MYS | 5 | 25.321 | 20.581 | 8.323  | 1.00 | 0.00 |
| H      |     |     |     |   |        |        |        |      |      |
| HETATM | 703 | H60 | MYS | 5 | 24.223 | 22.032 | 8.338  | 1.00 | 0.00 |
| H      |     |     |     |   |        |        |        |      |      |
| HETATM | 704 | N4  | MYS | 5 | 21.634 | 24.177 | 12.111 | 1.00 | 0.00 |
| N      |     |     |     |   |        |        |        |      |      |
| HETATM | 705 | H61 | MYS | 5 | 21.247 | 24.699 | 11.339 | 1.00 | 0.00 |
| H      |     |     |     |   |        |        |        |      |      |
| HETATM | 706 | C34 | MYS | 5 | 20.806 | 23.331 | 12.741 | 1.00 | 0.00 |
| C      |     |     |     |   |        |        |        |      |      |
| HETATM | 707 | O8  | MYS | 5 | 21.195 | 22.553 | 13.666 | 1.00 | 0.00 |
| O      |     |     |     |   |        |        |        |      |      |
| HETATM | 708 | C35 | MYS | 5 | 19.383 | 23.306 | 12.259 | 1.00 | 0.00 |
| C      |     |     |     |   |        |        |        |      |      |
| HETATM | 709 | H62 | MYS | 5 | 19.222 | 23.466 | 11.193 | 1.00 | 0.00 |
| H      |     |     |     |   |        |        |        |      |      |
| HETATM | 710 | H63 | MYS | 5 | 19.018 | 22.305 | 12.487 | 1.00 | 0.00 |
| H      |     |     |     |   |        |        |        |      |      |
| HETATM | 711 | C36 | MYS | 5 | 18.525 | 24.418 | 12.870 | 1.00 | 0.00 |
| C      |     |     |     |   |        |        |        |      |      |
| HETATM | 712 | H64 | MYS | 5 | 18.658 | 24.468 | 13.950 | 1.00 | 0.00 |
| H      |     |     |     |   |        |        |        |      |      |
| HETATM | 713 | H65 | MYS | 5 | 18.735 | 25.362 | 12.368 | 1.00 | 0.00 |
| H      |     |     |     |   |        |        |        |      |      |
| HETATM | 714 | C37 | MYS | 5 | 17.026 | 24.283 | 12.580 | 1.00 | 0.00 |
| C      |     |     |     |   |        |        |        |      |      |
| HETATM | 715 | H66 | MYS | 5 | 16.797 | 24.340 | 11.516 | 1.00 | 0.00 |
| H      |     |     |     |   |        |        |        |      |      |
| HETATM | 716 | H67 | MYS | 5 | 16.674 | 23.279 | 12.817 | 1.00 | 0.00 |
| H      |     |     |     |   |        |        |        |      |      |
| HETATM | 717 | C38 | MYS | 5 | 16.265 | 25.263 | 13.479 | 1.00 | 0.00 |
| C      |     |     |     |   |        |        |        |      |      |
| HETATM | 718 | H68 | MYS | 5 | 16.739 | 26.235 | 13.345 | 1.00 | 0.00 |
| H      |     |     |     |   |        |        |        |      |      |
| HETATM | 719 | H69 | MYS | 5 | 16.498 | 25.097 | 14.531 | 1.00 | 0.00 |
| H      |     |     |     |   |        |        |        |      |      |
| HETATM | 720 | C39 | MYS | 5 | 14.751 | 25.415 | 13.168 | 1.00 | 0.00 |
| C      |     |     |     |   |        |        |        |      |      |
| HETATM | 721 | H70 | MYS | 5 | 14.566 | 25.742 | 12.144 | 1.00 | 0.00 |
| H      |     |     |     |   |        |        |        |      |      |
| HETATM | 722 | H71 | MYS | 5 | 14.361 | 24.429 | 13.417 | 1.00 | 0.00 |
| H      |     |     |     |   |        |        |        |      |      |
| HETATM | 723 | C40 | MYS | 5 | 14.075 | 26.356 | 14.122 | 1.00 | 0.00 |
| C      |     |     |     |   |        |        |        |      |      |
| HETATM | 724 | H72 | MYS | 5 | 14.268 | 25.984 | 15.128 | 1.00 | 0.00 |
| H      |     |     |     |   |        |        |        |      |      |
| HETATM | 725 | H73 | MYS | 5 | 14.472 | 27.370 | 14.161 | 1.00 | 0.00 |
| H      |     |     |     |   |        |        |        |      |      |
| HETATM | 726 | C41 | MYS | 5 | 12.606 | 26.332 | 13.794 | 1.00 | 0.00 |
| C      |     |     |     |   |        |        |        |      |      |
| HETATM | 727 | H74 | MYS | 5 | 12.534 | 26.677 | 12.763 | 1.00 | 0.00 |
| H      |     |     |     |   |        |        |        |      |      |

|        |     |     |     |   |        |        |        |      |      |
|--------|-----|-----|-----|---|--------|--------|--------|------|------|
| HETATM | 728 | H75 | MYS | 5 | 12.366 | 25.271 | 13.866 | 1.00 | 0.00 |
| H      |     |     |     |   |        |        |        |      |      |
| HETATM | 729 | C42 | MYS | 5 | 11.799 | 27.288 | 14.749 | 1.00 | 0.00 |
| C      |     |     |     |   |        |        |        |      |      |
| HETATM | 730 | H76 | MYS | 5 | 12.120 | 28.323 | 14.630 | 1.00 | 0.00 |
| H      |     |     |     |   |        |        |        |      |      |
| HETATM | 731 | H77 | MYS | 5 | 12.155 | 27.005 | 15.739 | 1.00 | 0.00 |
| H      |     |     |     |   |        |        |        |      |      |
| HETATM | 732 | C43 | MYS | 5 | 10.340 | 27.170 | 14.630 | 1.00 | 0.00 |
| C      |     |     |     |   |        |        |        |      |      |
| HETATM | 733 | H78 | MYS | 5 | 9.964  | 27.293 | 13.615 | 1.00 | 0.00 |
| H      |     |     |     |   |        |        |        |      |      |
| HETATM | 734 | H79 | MYS | 5 | 10.023 | 26.175 | 14.941 | 1.00 | 0.00 |
| H      |     |     |     |   |        |        |        |      |      |
| HETATM | 735 | C44 | MYS | 5 | 9.606  | 28.160 | 15.553 | 1.00 | 0.00 |
| C      |     |     |     |   |        |        |        |      |      |
| HETATM | 736 | H80 | MYS | 5 | 9.731  | 27.846 | 16.589 | 1.00 | 0.00 |
| H      |     |     |     |   |        |        |        |      |      |
| HETATM | 737 | H81 | MYS | 5 | 9.998  | 29.173 | 15.461 | 1.00 | 0.00 |
| H      |     |     |     |   |        |        |        |      |      |
| HETATM | 738 | C45 | MYS | 5 | 8.096  | 28.031 | 15.399 | 1.00 | 0.00 |
| C      |     |     |     |   |        |        |        |      |      |
| HETATM | 739 | H82 | MYS | 5 | 7.773  | 28.732 | 14.629 | 1.00 | 0.00 |
| H      |     |     |     |   |        |        |        |      |      |
| HETATM | 740 | H83 | MYS | 5 | 7.870  | 27.050 | 14.981 | 1.00 | 0.00 |
| H      |     |     |     |   |        |        |        |      |      |
| HETATM | 741 | C46 | MYS | 5 | 7.319  | 28.362 | 16.695 | 1.00 | 0.00 |
| C      |     |     |     |   |        |        |        |      |      |
| HETATM | 742 | H84 | MYS | 5 | 7.574  | 29.290 | 17.207 | 1.00 | 0.00 |
| H      |     |     |     |   |        |        |        |      |      |
| HETATM | 743 | H85 | MYS | 5 | 7.614  | 27.670 | 17.483 | 1.00 | 0.00 |
| H      |     |     |     |   |        |        |        |      |      |
| HETATM | 744 | C47 | MYS | 5 | 5.752  | 28.173 | 16.391 | 1.00 | 0.00 |
| C      |     |     |     |   |        |        |        |      |      |
| HETATM | 745 | H86 | MYS | 5 | 5.606  | 27.205 | 15.911 | 1.00 | 0.00 |
| H      |     |     |     |   |        |        |        |      |      |
| HETATM | 746 | H87 | MYS | 5 | 5.295  | 28.253 | 17.378 | 1.00 | 0.00 |
| H      |     |     |     |   |        |        |        |      |      |
| HETATM | 747 | C48 | MYS | 5 | 5.044  | 29.246 | 15.587 | 1.00 | 0.00 |
| C      |     |     |     |   |        |        |        |      |      |
| HETATM | 748 | H88 | MYS | 5 | 3.956  | 29.236 | 15.646 | 1.00 | 0.00 |
| H      |     |     |     |   |        |        |        |      |      |
| HETATM | 749 | H89 | MYS | 5 | 5.346  | 30.178 | 16.066 | 1.00 | 0.00 |
| H      |     |     |     |   |        |        |        |      |      |
| HETATM | 750 | H90 | MYS | 5 | 5.532  | 29.385 | 14.622 | 1.00 | 0.00 |
| H      |     |     |     |   |        |        |        |      |      |
| HETATM | 751 | C1  | MYS | 6 | 23.444 | 30.521 | 17.167 | 1.00 | 0.00 |
| C      |     |     |     |   |        |        |        |      |      |
| HETATM | 752 | O1  | MYS | 6 | 22.351 | 31.063 | 17.257 | 1.00 | 0.00 |
| O      |     |     |     |   |        |        |        |      |      |
| HETATM | 753 | C2  | MYS | 6 | 23.919 | 29.963 | 15.716 | 1.00 | 0.00 |
| C      |     |     |     |   |        |        |        |      |      |
| HETATM | 754 | O2  | MYS | 6 | 24.953 | 29.296 | 15.591 | 1.00 | 0.00 |
| O      |     |     |     |   |        |        |        |      |      |
| HETATM | 755 | N1  | MYS | 6 | 24.227 | 30.149 | 18.183 | 1.00 | 0.00 |
| N      |     |     |     |   |        |        |        |      |      |

|        |     |     |     |   |        |        |        |      |      |
|--------|-----|-----|-----|---|--------|--------|--------|------|------|
| HETATM | 756 | H1  | MYS | 6 | 25.031 | 29.574 | 17.980 | 1.00 | 0.00 |
| H      |     |     |     |   |        |        |        |      |      |
| HETATM | 757 | C3  | MYS | 6 | 24.111 | 30.685 | 19.547 | 1.00 | 0.00 |
| C      |     |     |     |   |        |        |        |      |      |
| HETATM | 758 | H2  | MYS | 6 | 23.316 | 31.427 | 19.628 | 1.00 | 0.00 |
| H      |     |     |     |   |        |        |        |      |      |
| HETATM | 759 | H3  | MYS | 6 | 25.010 | 31.263 | 19.763 | 1.00 | 0.00 |
| H      |     |     |     |   |        |        |        |      |      |
| HETATM | 760 | C4  | MYS | 6 | 23.925 | 29.568 | 20.615 | 1.00 | 0.00 |
| C      |     |     |     |   |        |        |        |      |      |
| HETATM | 761 | H4  | MYS | 6 | 24.549 | 28.684 | 20.484 | 1.00 | 0.00 |
| H      |     |     |     |   |        |        |        |      |      |
| HETATM | 762 | H5  | MYS | 6 | 22.936 | 29.197 | 20.347 | 1.00 | 0.00 |
| H      |     |     |     |   |        |        |        |      |      |
| HETATM | 763 | C5  | MYS | 6 | 23.958 | 30.024 | 22.048 | 1.00 | 0.00 |
| C      |     |     |     |   |        |        |        |      |      |
| HETATM | 764 | H6  | MYS | 6 | 25.016 | 30.174 | 22.261 | 1.00 | 0.00 |
| H      |     |     |     |   |        |        |        |      |      |
| HETATM | 765 | H7  | MYS | 6 | 23.562 | 29.207 | 22.651 | 1.00 | 0.00 |
| H      |     |     |     |   |        |        |        |      |      |
| HETATM | 766 | C6  | MYS | 6 | 23.313 | 31.372 | 22.320 | 1.00 | 0.00 |
| C      |     |     |     |   |        |        |        |      |      |
| HETATM | 767 | H8  | MYS | 6 | 22.229 | 31.357 | 22.206 | 1.00 | 0.00 |
| H      |     |     |     |   |        |        |        |      |      |
| HETATM | 768 | H9  | MYS | 6 | 23.731 | 32.077 | 21.602 | 1.00 | 0.00 |
| H      |     |     |     |   |        |        |        |      |      |
| HETATM | 769 | C7  | MYS | 6 | 23.624 | 31.745 | 23.772 | 1.00 | 0.00 |
| C      |     |     |     |   |        |        |        |      |      |
| HETATM | 770 | H10 | MYS | 6 | 24.696 | 31.933 | 23.820 | 1.00 | 0.00 |
| H      |     |     |     |   |        |        |        |      |      |
| HETATM | 771 | C8  | MYS | 6 | 22.958 | 33.110 | 24.203 | 1.00 | 0.00 |
| C      |     |     |     |   |        |        |        |      |      |
| HETATM | 772 | O3  | MYS | 6 | 22.436 | 33.902 | 23.354 | 1.00 | 0.00 |
| O      |     |     |     |   |        |        |        |      |      |
| HETATM | 773 | O4  | MYS | 6 | 22.949 | 33.324 | 25.480 | 1.00 | 0.00 |
| O      |     |     |     |   |        |        |        |      |      |
| HETATM | 774 | C9  | MYS | 6 | 22.049 | 34.276 | 26.078 | 1.00 | 0.00 |
| C      |     |     |     |   |        |        |        |      |      |
| HETATM | 775 | H11 | MYS | 6 | 21.026 | 33.988 | 25.835 | 1.00 | 0.00 |
| H      |     |     |     |   |        |        |        |      |      |
| HETATM | 776 | H12 | MYS | 6 | 22.225 | 35.254 | 25.631 | 1.00 | 0.00 |
| H      |     |     |     |   |        |        |        |      |      |
| HETATM | 777 | C10 | MYS | 6 | 22.173 | 34.308 | 27.595 | 1.00 | 0.00 |
| C      |     |     |     |   |        |        |        |      |      |
| HETATM | 778 | H13 | MYS | 6 | 21.464 | 35.049 | 27.963 | 1.00 | 0.00 |
| H      |     |     |     |   |        |        |        |      |      |
| HETATM | 779 | H14 | MYS | 6 | 22.025 | 33.331 | 28.055 | 1.00 | 0.00 |
| H      |     |     |     |   |        |        |        |      |      |
| HETATM | 780 | H15 | MYS | 6 | 23.227 | 34.501 | 27.790 | 1.00 | 0.00 |
| H      |     |     |     |   |        |        |        |      |      |
| HETATM | 781 | N2  | MYS | 6 | 23.373 | 30.635 | 24.690 | 1.00 | 0.00 |
| N      |     |     |     |   |        |        |        |      |      |
| HETATM | 782 | H16 | MYS | 6 | 24.220 | 30.344 | 25.156 | 1.00 | 0.00 |
| H      |     |     |     |   |        |        |        |      |      |
| HETATM | 783 | C11 | MYS | 6 | 22.254 | 30.193 | 25.104 | 1.00 | 0.00 |
| C      |     |     |     |   |        |        |        |      |      |

|        |     |     |     |   |        |        |        |      |      |
|--------|-----|-----|-----|---|--------|--------|--------|------|------|
| HETATM | 784 | O5  | MYS | 6 | 21.213 | 30.653 | 24.677 | 1.00 | 0.00 |
| O      |     |     |     |   |        |        |        |      |      |
| HETATM | 785 | C12 | MYS | 6 | 22.256 | 29.323 | 26.346 | 1.00 | 0.00 |
| C      |     |     |     |   |        |        |        |      |      |
| HETATM | 786 | H17 | MYS | 6 | 21.514 | 28.527 | 26.403 | 1.00 | 0.00 |
| H      |     |     |     |   |        |        |        |      |      |
| HETATM | 787 | H18 | MYS | 6 | 23.223 | 28.825 | 26.420 | 1.00 | 0.00 |
| H      |     |     |     |   |        |        |        |      |      |
| HETATM | 788 | C13 | MYS | 6 | 22.265 | 30.244 | 27.584 | 1.00 | 0.00 |
| C      |     |     |     |   |        |        |        |      |      |
| HETATM | 789 | H19 | MYS | 6 | 22.922 | 31.103 | 27.444 | 1.00 | 0.00 |
| H      |     |     |     |   |        |        |        |      |      |
| HETATM | 790 | H20 | MYS | 6 | 21.246 | 30.585 | 27.765 | 1.00 | 0.00 |
| H      |     |     |     |   |        |        |        |      |      |
| HETATM | 791 | C14 | MYS | 6 | 22.511 | 29.418 | 28.849 | 1.00 | 0.00 |
| C      |     |     |     |   |        |        |        |      |      |
| HETATM | 792 | H21 | MYS | 6 | 21.751 | 28.639 | 28.913 | 1.00 | 0.00 |
| H      |     |     |     |   |        |        |        |      |      |
| HETATM | 793 | H22 | MYS | 6 | 23.489 | 28.938 | 28.882 | 1.00 | 0.00 |
| H      |     |     |     |   |        |        |        |      |      |
| HETATM | 794 | C15 | MYS | 6 | 22.320 | 30.376 | 30.027 | 1.00 | 0.00 |
| C      |     |     |     |   |        |        |        |      |      |
| HETATM | 795 | H23 | MYS | 6 | 23.195 | 31.018 | 29.925 | 1.00 | 0.00 |
| H      |     |     |     |   |        |        |        |      |      |
| HETATM | 796 | H24 | MYS | 6 | 21.462 | 31.044 | 29.963 | 1.00 | 0.00 |
| H      |     |     |     |   |        |        |        |      |      |
| HETATM | 797 | C16 | MYS | 6 | 22.287 | 29.709 | 31.418 | 1.00 | 0.00 |
| C      |     |     |     |   |        |        |        |      |      |
| HETATM | 798 | H25 | MYS | 6 | 21.401 | 29.080 | 31.330 | 1.00 | 0.00 |
| H      |     |     |     |   |        |        |        |      |      |
| HETATM | 799 | H26 | MYS | 6 | 23.183 | 29.089 | 31.429 | 1.00 | 0.00 |
| H      |     |     |     |   |        |        |        |      |      |
| HETATM | 800 | C17 | MYS | 6 | 22.148 | 30.691 | 32.587 | 1.00 | 0.00 |
| C      |     |     |     |   |        |        |        |      |      |
| HETATM | 801 | H27 | MYS | 6 | 22.983 | 31.384 | 32.482 | 1.00 | 0.00 |
| H      |     |     |     |   |        |        |        |      |      |
| HETATM | 802 | H28 | MYS | 6 | 21.256 | 31.316 | 32.540 | 1.00 | 0.00 |
| H      |     |     |     |   |        |        |        |      |      |
| HETATM | 803 | C18 | MYS | 6 | 22.111 | 29.933 | 33.971 | 1.00 | 0.00 |
| C      |     |     |     |   |        |        |        |      |      |
| HETATM | 804 | H29 | MYS | 6 | 21.226 | 29.312 | 34.107 | 1.00 | 0.00 |
| H      |     |     |     |   |        |        |        |      |      |
| HETATM | 805 | H30 | MYS | 6 | 23.018 | 29.337 | 34.070 | 1.00 | 0.00 |
| H      |     |     |     |   |        |        |        |      |      |
| HETATM | 806 | C19 | MYS | 6 | 22.128 | 30.983 | 35.066 | 1.00 | 0.00 |
| C      |     |     |     |   |        |        |        |      |      |
| HETATM | 807 | H31 | MYS | 6 | 21.247 | 31.606 | 34.918 | 1.00 | 0.00 |
| H      |     |     |     |   |        |        |        |      |      |
| HETATM | 808 | H32 | MYS | 6 | 23.033 | 31.570 | 34.911 | 1.00 | 0.00 |
| H      |     |     |     |   |        |        |        |      |      |
| HETATM | 809 | C20 | MYS | 6 | 22.293 | 30.396 | 36.558 | 1.00 | 0.00 |
| C      |     |     |     |   |        |        |        |      |      |
| HETATM | 810 | H33 | MYS | 6 | 21.460 | 29.733 | 36.790 | 1.00 | 0.00 |
| H      |     |     |     |   |        |        |        |      |      |
| HETATM | 811 | H34 | MYS | 6 | 23.253 | 29.881 | 36.520 | 1.00 | 0.00 |
| H      |     |     |     |   |        |        |        |      |      |



|        |     |     |     |   |        |        |        |      |      |
|--------|-----|-----|-----|---|--------|--------|--------|------|------|
| HETATM | 812 | C21 | MYS | 6 | 22.241 | 31.587 | 37.492 | 1.00 | 0.00 |
| C      |     |     |     |   |        |        |        |      |      |
| HETATM | 813 | H35 | MYS | 6 | 21.292 | 32.084 | 37.290 | 1.00 | 0.00 |
| H      |     |     |     |   |        |        |        |      |      |
| HETATM | 814 | H36 | MYS | 6 | 22.043 | 31.210 | 38.495 | 1.00 | 0.00 |
| H      |     |     |     |   |        |        |        |      |      |
| HETATM | 815 | C22 | MYS | 6 | 23.360 | 32.673 | 37.491 | 1.00 | 0.00 |
| C      |     |     |     |   |        |        |        |      |      |
| HETATM | 816 | H37 | MYS | 6 | 24.344 | 32.204 | 37.521 | 1.00 | 0.00 |
| H      |     |     |     |   |        |        |        |      |      |
| HETATM | 817 | H38 | MYS | 6 | 23.316 | 33.238 | 36.560 | 1.00 | 0.00 |
| H      |     |     |     |   |        |        |        |      |      |
| HETATM | 818 | C23 | MYS | 6 | 23.182 | 33.566 | 38.671 | 1.00 | 0.00 |
| C      |     |     |     |   |        |        |        |      |      |
| HETATM | 819 | H39 | MYS | 6 | 22.327 | 34.229 | 38.533 | 1.00 | 0.00 |
| H      |     |     |     |   |        |        |        |      |      |
| HETATM | 820 | H40 | MYS | 6 | 22.873 | 33.085 | 39.598 | 1.00 | 0.00 |
| H      |     |     |     |   |        |        |        |      |      |
| HETATM | 821 | C24 | MYS | 6 | 24.425 | 34.453 | 38.859 | 1.00 | 0.00 |
| C      |     |     |     |   |        |        |        |      |      |
| HETATM | 822 | H41 | MYS | 6 | 24.598 | 34.966 | 37.913 | 1.00 | 0.00 |
| H      |     |     |     |   |        |        |        |      |      |
| HETATM | 823 | H42 | MYS | 6 | 25.302 | 33.853 | 39.102 | 1.00 | 0.00 |
| H      |     |     |     |   |        |        |        |      |      |
| HETATM | 824 | C25 | MYS | 6 | 24.150 | 35.464 | 39.989 | 1.00 | 0.00 |
| C      |     |     |     |   |        |        |        |      |      |
| HETATM | 825 | H43 | MYS | 6 | 23.503 | 35.151 | 40.809 | 1.00 | 0.00 |
| H      |     |     |     |   |        |        |        |      |      |
| HETATM | 826 | H44 | MYS | 6 | 25.098 | 35.656 | 40.490 | 1.00 | 0.00 |
| H      |     |     |     |   |        |        |        |      |      |
| HETATM | 827 | H45 | MYS | 6 | 23.792 | 36.364 | 39.489 | 1.00 | 0.00 |
| H      |     |     |     |   |        |        |        |      |      |
| HETATM | 828 | N3  | MYS | 6 | 23.075 | 30.259 | 14.723 | 1.00 | 0.00 |
| N      |     |     |     |   |        |        |        |      |      |
| HETATM | 829 | H46 | MYS | 6 | 22.339 | 30.918 | 14.933 | 1.00 | 0.00 |
| H      |     |     |     |   |        |        |        |      |      |
| HETATM | 830 | C26 | MYS | 6 | 23.268 | 29.798 | 13.353 | 1.00 | 0.00 |
| C      |     |     |     |   |        |        |        |      |      |
| HETATM | 831 | H47 | MYS | 6 | 23.231 | 28.709 | 13.384 | 1.00 | 0.00 |
| H      |     |     |     |   |        |        |        |      |      |
| HETATM | 832 | H48 | MYS | 6 | 24.221 | 30.138 | 12.947 | 1.00 | 0.00 |
| H      |     |     |     |   |        |        |        |      |      |
| HETATM | 833 | C27 | MYS | 6 | 22.116 | 30.235 | 12.452 | 1.00 | 0.00 |
| C      |     |     |     |   |        |        |        |      |      |
| HETATM | 834 | H49 | MYS | 6 | 22.068 | 31.323 | 12.492 | 1.00 | 0.00 |
| H      |     |     |     |   |        |        |        |      |      |
| HETATM | 835 | H50 | MYS | 6 | 21.173 | 29.796 | 12.777 | 1.00 | 0.00 |
| H      |     |     |     |   |        |        |        |      |      |
| HETATM | 836 | C28 | MYS | 6 | 22.305 | 29.858 | 11.028 | 1.00 | 0.00 |
| C      |     |     |     |   |        |        |        |      |      |
| HETATM | 837 | H51 | MYS | 6 | 23.173 | 30.426 | 10.692 | 1.00 | 0.00 |
| H      |     |     |     |   |        |        |        |      |      |
| HETATM | 838 | H52 | MYS | 6 | 21.369 | 30.199 | 10.587 | 1.00 | 0.00 |
| H      |     |     |     |   |        |        |        |      |      |
| HETATM | 839 | C29 | MYS | 6 | 22.654 | 28.302 | 10.785 | 1.00 | 0.00 |
| C      |     |     |     |   |        |        |        |      |      |

|        |     |     |     |   |        |        |        |      |      |
|--------|-----|-----|-----|---|--------|--------|--------|------|------|
| HETATM | 840 | H53 | MYS | 6 | 21.924 | 27.780 | 11.403 | 1.00 | 0.00 |
| H      |     |     |     |   |        |        |        |      |      |
| HETATM | 841 | H54 | MYS | 6 | 23.695 | 28.108 | 11.048 | 1.00 | 0.00 |
| H      |     |     |     |   |        |        |        |      |      |
| HETATM | 842 | C30 | MYS | 6 | 22.269 | 28.033 | 9.322  | 1.00 | 0.00 |
| C      |     |     |     |   |        |        |        |      |      |
| HETATM | 843 | H55 | MYS | 6 | 22.484 | 28.912 | 8.715  | 1.00 | 0.00 |
| H      |     |     |     |   |        |        |        |      |      |
| HETATM | 844 | C31 | MYS | 6 | 23.036 | 26.822 | 8.697  | 1.00 | 0.00 |
| C      |     |     |     |   |        |        |        |      |      |
| HETATM | 845 | O6  | MYS | 6 | 22.430 | 26.073 | 7.968  | 1.00 | 0.00 |
| O      |     |     |     |   |        |        |        |      |      |
| HETATM | 846 | O7  | MYS | 6 | 24.386 | 26.773 | 8.991  | 1.00 | 0.00 |
| O      |     |     |     |   |        |        |        |      |      |
| HETATM | 847 | C32 | MYS | 6 | 25.120 | 25.593 | 8.505  | 1.00 | 0.00 |
| C      |     |     |     |   |        |        |        |      |      |
| HETATM | 848 | H56 | MYS | 6 | 25.214 | 25.618 | 7.419  | 1.00 | 0.00 |
| H      |     |     |     |   |        |        |        |      |      |
| HETATM | 849 | H57 | MYS | 6 | 24.720 | 24.646 | 8.869  | 1.00 | 0.00 |
| H      |     |     |     |   |        |        |        |      |      |
| HETATM | 850 | C33 | MYS | 6 | 26.517 | 25.713 | 8.985  | 1.00 | 0.00 |
| C      |     |     |     |   |        |        |        |      |      |
| HETATM | 851 | H58 | MYS | 6 | 26.385 | 25.944 | 10.042 | 1.00 | 0.00 |
| H      |     |     |     |   |        |        |        |      |      |
| HETATM | 852 | H59 | MYS | 6 | 27.171 | 24.876 | 8.741  | 1.00 | 0.00 |
| H      |     |     |     |   |        |        |        |      |      |
| HETATM | 853 | H60 | MYS | 6 | 27.002 | 26.527 | 8.446  | 1.00 | 0.00 |
| H      |     |     |     |   |        |        |        |      |      |
| HETATM | 854 | N4  | MYS | 6 | 20.753 | 27.885 | 9.252  | 1.00 | 0.00 |
| N      |     |     |     |   |        |        |        |      |      |
| HETATM | 855 | H61 | MYS | 6 | 20.289 | 28.530 | 8.628  | 1.00 | 0.00 |
| H      |     |     |     |   |        |        |        |      |      |
| HETATM | 856 | C34 | MYS | 6 | 20.025 | 26.888 | 9.699  | 1.00 | 0.00 |
| C      |     |     |     |   |        |        |        |      |      |
| HETATM | 857 | O8  | MYS | 6 | 20.551 | 25.981 | 10.271 | 1.00 | 0.00 |
| O      |     |     |     |   |        |        |        |      |      |
| HETATM | 858 | C35 | MYS | 6 | 18.521 | 26.989 | 9.456  | 1.00 | 0.00 |
| C      |     |     |     |   |        |        |        |      |      |
| HETATM | 859 | H62 | MYS | 6 | 18.338 | 27.497 | 8.509  | 1.00 | 0.00 |
| H      |     |     |     |   |        |        |        |      |      |
| HETATM | 860 | H63 | MYS | 6 | 18.066 | 25.999 | 9.468  | 1.00 | 0.00 |
| H      |     |     |     |   |        |        |        |      |      |
| HETATM | 861 | C36 | MYS | 6 | 17.808 | 27.821 | 10.547 | 1.00 | 0.00 |
| C      |     |     |     |   |        |        |        |      |      |
| HETATM | 862 | H64 | MYS | 6 | 17.971 | 27.298 | 11.489 | 1.00 | 0.00 |
| H      |     |     |     |   |        |        |        |      |      |
| HETATM | 863 | H65 | MYS | 6 | 18.378 | 28.749 | 10.492 | 1.00 | 0.00 |
| H      |     |     |     |   |        |        |        |      |      |
| HETATM | 864 | C37 | MYS | 6 | 16.390 | 28.138 | 10.287 | 1.00 | 0.00 |
| C      |     |     |     |   |        |        |        |      |      |
| HETATM | 865 | H66 | MYS | 6 | 16.314 | 28.717 | 9.367  | 1.00 | 0.00 |
| H      |     |     |     |   |        |        |        |      |      |
| HETATM | 866 | H67 | MYS | 6 | 15.903 | 27.167 | 10.202 | 1.00 | 0.00 |
| H      |     |     |     |   |        |        |        |      |      |
| HETATM | 867 | C38 | MYS | 6 | 15.721 | 28.934 | 11.474 | 1.00 | 0.00 |
| C      |     |     |     |   |        |        |        |      |      |

|        |     |     |     |   |        |        |        |      |      |
|--------|-----|-----|-----|---|--------|--------|--------|------|------|
| HETATM | 868 | H68 | MYS | 6 | 16.306 | 29.829 | 11.689 | 1.00 | 0.00 |
| H      |     |     |     |   |        |        |        |      |      |
| HETATM | 869 | H69 | MYS | 6 | 15.766 | 28.246 | 12.317 | 1.00 | 0.00 |
| H      |     |     |     |   |        |        |        |      |      |
| HETATM | 870 | C39 | MYS | 6 | 14.279 | 29.238 | 11.296 | 1.00 | 0.00 |
| C      |     |     |     |   |        |        |        |      |      |
| HETATM | 871 | H70 | MYS | 6 | 14.187 | 29.877 | 10.418 | 1.00 | 0.00 |
| H      |     |     |     |   |        |        |        |      |      |
| HETATM | 872 | H71 | MYS | 6 | 13.694 | 28.333 | 11.132 | 1.00 | 0.00 |
| H      |     |     |     |   |        |        |        |      |      |
| HETATM | 873 | C40 | MYS | 6 | 13.786 | 30.092 | 12.519 | 1.00 | 0.00 |
| C      |     |     |     |   |        |        |        |      |      |
| HETATM | 874 | H72 | MYS | 6 | 13.965 | 29.636 | 13.493 | 1.00 | 0.00 |
| H      |     |     |     |   |        |        |        |      |      |
| HETATM | 875 | H73 | MYS | 6 | 14.222 | 31.091 | 12.528 | 1.00 | 0.00 |
| H      |     |     |     |   |        |        |        |      |      |
| HETATM | 876 | C41 | MYS | 6 | 12.291 | 30.137 | 12.165 | 1.00 | 0.00 |
| C      |     |     |     |   |        |        |        |      |      |
| HETATM | 877 | H74 | MYS | 6 | 12.127 | 30.532 | 11.162 | 1.00 | 0.00 |
| H      |     |     |     |   |        |        |        |      |      |
| HETATM | 878 | H75 | MYS | 6 | 11.865 | 29.140 | 12.277 | 1.00 | 0.00 |
| H      |     |     |     |   |        |        |        |      |      |
| HETATM | 879 | C42 | MYS | 6 | 11.511 | 30.999 | 13.204 | 1.00 | 0.00 |
| C      |     |     |     |   |        |        |        |      |      |
| HETATM | 880 | H76 | MYS | 6 | 11.837 | 32.033 | 13.093 | 1.00 | 0.00 |
| H      |     |     |     |   |        |        |        |      |      |
| HETATM | 881 | H77 | MYS | 6 | 11.627 | 30.652 | 14.230 | 1.00 | 0.00 |
| H      |     |     |     |   |        |        |        |      |      |
| HETATM | 882 | C43 | MYS | 6 | 10.017 | 31.035 | 12.780 | 1.00 | 0.00 |
| C      |     |     |     |   |        |        |        |      |      |
| HETATM | 883 | H78 | MYS | 6 | 9.978  | 31.332 | 11.732 | 1.00 | 0.00 |
| H      |     |     |     |   |        |        |        |      |      |
| HETATM | 884 | H79 | MYS | 6 | 9.694  | 30.003 | 12.919 | 1.00 | 0.00 |
| H      |     |     |     |   |        |        |        |      |      |
| HETATM | 885 | C44 | MYS | 6 | 9.121  | 31.918 | 13.627 | 1.00 | 0.00 |
| C      |     |     |     |   |        |        |        |      |      |
| HETATM | 886 | H80 | MYS | 6 | 9.005  | 31.525 | 14.637 | 1.00 | 0.00 |
| H      |     |     |     |   |        |        |        |      |      |
| HETATM | 887 | H81 | MYS | 6 | 9.589  | 32.903 | 13.623 | 1.00 | 0.00 |
| H      |     |     |     |   |        |        |        |      |      |
| HETATM | 888 | C45 | MYS | 6 | 7.735  | 32.009 | 13.074 | 1.00 | 0.00 |
| C      |     |     |     |   |        |        |        |      |      |
| HETATM | 889 | H82 | MYS | 6 | 7.753  | 32.678 | 12.213 | 1.00 | 0.00 |
| H      |     |     |     |   |        |        |        |      |      |
| HETATM | 890 | H83 | MYS | 6 | 7.459  | 31.116 | 12.512 | 1.00 | 0.00 |
| H      |     |     |     |   |        |        |        |      |      |
| HETATM | 891 | C46 | MYS | 6 | 6.689  | 32.531 | 14.037 | 1.00 | 0.00 |
| C      |     |     |     |   |        |        |        |      |      |
| HETATM | 892 | H84 | MYS | 6 | 7.054  | 33.378 | 14.618 | 1.00 | 0.00 |
| H      |     |     |     |   |        |        |        |      |      |
| HETATM | 893 | H85 | MYS | 6 | 6.613  | 31.727 | 14.769 | 1.00 | 0.00 |
| H      |     |     |     |   |        |        |        |      |      |
| HETATM | 894 | C47 | MYS | 6 | 5.372  | 32.976 | 13.482 | 1.00 | 0.00 |
| C      |     |     |     |   |        |        |        |      |      |
| HETATM | 895 | H86 | MYS | 6 | 5.559  | 33.844 | 12.851 | 1.00 | 0.00 |
| H      |     |     |     |   |        |        |        |      |      |

|        |     |     |     |   |        |        |        |      |      |
|--------|-----|-----|-----|---|--------|--------|--------|------|------|
| HETATM | 896 | H87 | MYS | 6 | 5.083  | 32.229 | 12.743 | 1.00 | 0.00 |
| H      |     |     |     |   |        |        |        |      |      |
| HETATM | 897 | C48 | MYS | 6 | 4.217  | 33.331 | 14.531 | 1.00 | 0.00 |
| C      |     |     |     |   |        |        |        |      |      |
| HETATM | 898 | H88 | MYS | 6 | 3.441  | 33.857 | 13.974 | 1.00 | 0.00 |
| H      |     |     |     |   |        |        |        |      |      |
| HETATM | 899 | H89 | MYS | 6 | 3.780  | 32.471 | 15.037 | 1.00 | 0.00 |
| H      |     |     |     |   |        |        |        |      |      |
| HETATM | 900 | H90 | MYS | 6 | 4.688  | 33.939 | 15.304 | 1.00 | 0.00 |
| H      |     |     |     |   |        |        |        |      |      |
| HETATM | 901 | C1  | MYS | 7 | 20.414 | 34.319 | 16.160 | 1.00 | 0.00 |
| C      |     |     |     |   |        |        |        |      |      |
| HETATM | 902 | O1  | MYS | 7 | 19.733 | 35.354 | 16.101 | 1.00 | 0.00 |
| O      |     |     |     |   |        |        |        |      |      |
| HETATM | 903 | C2  | MYS | 7 | 20.955 | 33.778 | 14.792 | 1.00 | 0.00 |
| C      |     |     |     |   |        |        |        |      |      |
| HETATM | 904 | O2  | MYS | 7 | 21.582 | 32.731 | 14.656 | 1.00 | 0.00 |
| O      |     |     |     |   |        |        |        |      |      |
| HETATM | 905 | N1  | MYS | 7 | 20.833 | 33.719 | 17.255 | 1.00 | 0.00 |
| N      |     |     |     |   |        |        |        |      |      |
| HETATM | 906 | H1  | MYS | 7 | 21.403 | 32.887 | 17.194 | 1.00 | 0.00 |
| H      |     |     |     |   |        |        |        |      |      |
| HETATM | 907 | C3  | MYS | 7 | 20.711 | 34.143 | 18.610 | 1.00 | 0.00 |
| C      |     |     |     |   |        |        |        |      |      |
| HETATM | 908 | H2  | MYS | 7 | 20.202 | 35.107 | 18.606 | 1.00 | 0.00 |
| H      |     |     |     |   |        |        |        |      |      |
| HETATM | 909 | H3  | MYS | 7 | 21.689 | 34.259 | 19.077 | 1.00 | 0.00 |
| H      |     |     |     |   |        |        |        |      |      |
| HETATM | 910 | C4  | MYS | 7 | 19.876 | 33.249 | 19.465 | 1.00 | 0.00 |
| C      |     |     |     |   |        |        |        |      |      |
| HETATM | 911 | H4  | MYS | 7 | 20.228 | 32.222 | 19.374 | 1.00 | 0.00 |
| H      |     |     |     |   |        |        |        |      |      |
| HETATM | 912 | H5  | MYS | 7 | 18.872 | 33.204 | 19.045 | 1.00 | 0.00 |
| H      |     |     |     |   |        |        |        |      |      |
| HETATM | 913 | C5  | MYS | 7 | 19.930 | 33.813 | 20.890 | 1.00 | 0.00 |
| C      |     |     |     |   |        |        |        |      |      |
| HETATM | 914 | H6  | MYS | 7 | 19.548 | 34.833 | 20.847 | 1.00 | 0.00 |
| H      |     |     |     |   |        |        |        |      |      |
| HETATM | 915 | H7  | MYS | 7 | 20.962 | 33.817 | 21.242 | 1.00 | 0.00 |
| H      |     |     |     |   |        |        |        |      |      |
| HETATM | 916 | C6  | MYS | 7 | 19.030 | 32.923 | 21.778 | 1.00 | 0.00 |
| C      |     |     |     |   |        |        |        |      |      |
| HETATM | 917 | H8  | MYS | 7 | 19.241 | 31.869 | 21.597 | 1.00 | 0.00 |
| H      |     |     |     |   |        |        |        |      |      |
| HETATM | 918 | H9  | MYS | 7 | 17.965 | 33.077 | 21.604 | 1.00 | 0.00 |
| H      |     |     |     |   |        |        |        |      |      |
| HETATM | 919 | C7  | MYS | 7 | 19.160 | 33.272 | 23.286 | 1.00 | 0.00 |
| C      |     |     |     |   |        |        |        |      |      |
| HETATM | 920 | H10 | MYS | 7 | 20.203 | 33.534 | 23.467 | 1.00 | 0.00 |
| H      |     |     |     |   |        |        |        |      |      |
| HETATM | 921 | C8  | MYS | 7 | 18.385 | 34.499 | 23.704 | 1.00 | 0.00 |
| C      |     |     |     |   |        |        |        |      |      |
| HETATM | 922 | O3  | MYS | 7 | 17.392 | 34.901 | 23.045 | 1.00 | 0.00 |
| O      |     |     |     |   |        |        |        |      |      |
| HETATM | 923 | O4  | MYS | 7 | 18.761 | 35.102 | 24.851 | 1.00 | 0.00 |
| O      |     |     |     |   |        |        |        |      |      |

|        |     |     |     |   |        |        |        |      |      |
|--------|-----|-----|-----|---|--------|--------|--------|------|------|
| HETATM | 924 | C9  | MYS | 7 | 18.292 | 36.444 | 25.201 | 1.00 | 0.00 |
| C      |     |     |     |   |        |        |        |      |      |
| HETATM | 925 | H11 | MYS | 7 | 17.303 | 36.295 | 25.634 | 1.00 | 0.00 |
| H      |     |     |     |   |        |        |        |      |      |
| HETATM | 926 | H12 | MYS | 7 | 18.400 | 37.095 | 24.333 | 1.00 | 0.00 |
| H      |     |     |     |   |        |        |        |      |      |
| HETATM | 927 | C10 | MYS | 7 | 19.104 | 36.982 | 26.362 | 1.00 | 0.00 |
| C      |     |     |     |   |        |        |        |      |      |
| HETATM | 928 | H13 | MYS | 7 | 20.047 | 37.453 | 26.086 | 1.00 | 0.00 |
| H      |     |     |     |   |        |        |        |      |      |
| HETATM | 929 | H14 | MYS | 7 | 18.449 | 37.616 | 26.960 | 1.00 | 0.00 |
| H      |     |     |     |   |        |        |        |      |      |
| HETATM | 930 | H15 | MYS | 7 | 19.442 | 36.124 | 26.942 | 1.00 | 0.00 |
| H      |     |     |     |   |        |        |        |      |      |
| HETATM | 931 | N2  | MYS | 7 | 18.937 | 32.191 | 24.126 | 1.00 | 0.00 |
| N      |     |     |     |   |        |        |        |      |      |
| HETATM | 932 | H16 | MYS | 7 | 19.750 | 31.718 | 24.495 | 1.00 | 0.00 |
| H      |     |     |     |   |        |        |        |      |      |
| HETATM | 933 | C11 | MYS | 7 | 17.764 | 31.756 | 24.681 | 1.00 | 0.00 |
| C      |     |     |     |   |        |        |        |      |      |
| HETATM | 934 | O5  | MYS | 7 | 16.675 | 32.279 | 24.458 | 1.00 | 0.00 |
| O      |     |     |     |   |        |        |        |      |      |
| HETATM | 935 | C12 | MYS | 7 | 17.853 | 30.656 | 25.712 | 1.00 | 0.00 |
| C      |     |     |     |   |        |        |        |      |      |
| HETATM | 936 | H17 | MYS | 7 | 16.909 | 30.120 | 25.803 | 1.00 | 0.00 |
| H      |     |     |     |   |        |        |        |      |      |
| HETATM | 937 | H18 | MYS | 7 | 18.698 | 30.017 | 25.453 | 1.00 | 0.00 |
| H      |     |     |     |   |        |        |        |      |      |
| HETATM | 938 | C13 | MYS | 7 | 18.011 | 31.265 | 27.090 | 1.00 | 0.00 |
| C      |     |     |     |   |        |        |        |      |      |
| HETATM | 939 | H19 | MYS | 7 | 19.036 | 31.596 | 27.256 | 1.00 | 0.00 |
| H      |     |     |     |   |        |        |        |      |      |
| HETATM | 940 | H20 | MYS | 7 | 17.358 | 32.137 | 27.109 | 1.00 | 0.00 |
| H      |     |     |     |   |        |        |        |      |      |
| HETATM | 941 | C14 | MYS | 7 | 17.737 | 30.256 | 28.226 | 1.00 | 0.00 |
| C      |     |     |     |   |        |        |        |      |      |
| HETATM | 942 | H21 | MYS | 7 | 16.690 | 29.972 | 28.330 | 1.00 | 0.00 |
| H      |     |     |     |   |        |        |        |      |      |
| HETATM | 943 | H22 | MYS | 7 | 18.156 | 29.313 | 27.876 | 1.00 | 0.00 |
| H      |     |     |     |   |        |        |        |      |      |
| HETATM | 944 | C15 | MYS | 7 | 18.206 | 30.666 | 29.615 | 1.00 | 0.00 |
| C      |     |     |     |   |        |        |        |      |      |
| HETATM | 945 | H23 | MYS | 7 | 19.272 | 30.890 | 29.625 | 1.00 | 0.00 |
| H      |     |     |     |   |        |        |        |      |      |
| HETATM | 946 | H24 | MYS | 7 | 17.717 | 31.600 | 29.892 | 1.00 | 0.00 |
| H      |     |     |     |   |        |        |        |      |      |
| HETATM | 947 | C16 | MYS | 7 | 17.906 | 29.587 | 30.700 | 1.00 | 0.00 |
| C      |     |     |     |   |        |        |        |      |      |
| HETATM | 948 | H25 | MYS | 7 | 16.826 | 29.448 | 30.650 | 1.00 | 0.00 |
| H      |     |     |     |   |        |        |        |      |      |
| HETATM | 949 | H26 | MYS | 7 | 18.442 | 28.660 | 30.500 | 1.00 | 0.00 |
| H      |     |     |     |   |        |        |        |      |      |
| HETATM | 950 | C17 | MYS | 7 | 18.349 | 30.045 | 32.088 | 1.00 | 0.00 |
| C      |     |     |     |   |        |        |        |      |      |
| HETATM | 951 | H27 | MYS | 7 | 19.427 | 30.143 | 32.219 | 1.00 | 0.00 |
| H      |     |     |     |   |        |        |        |      |      |

|        |     |     |     |   |        |        |        |      |      |
|--------|-----|-----|-----|---|--------|--------|--------|------|------|
| HETATM | 952 | H28 | MYS | 7 | 17.725 | 30.906 | 32.329 | 1.00 | 0.00 |
| H      |     |     |     |   |        |        |        |      |      |
| HETATM | 953 | C18 | MYS | 7 | 17.877 | 28.853 | 32.964 | 1.00 | 0.00 |
| C      |     |     |     |   |        |        |        |      |      |
| HETATM | 954 | H29 | MYS | 7 | 16.805 | 28.849 | 32.763 | 1.00 | 0.00 |
| H      |     |     |     |   |        |        |        |      |      |
| HETATM | 955 | H30 | MYS | 7 | 18.315 | 27.913 | 32.629 | 1.00 | 0.00 |
| H      |     |     |     |   |        |        |        |      |      |
| HETATM | 956 | C19 | MYS | 7 | 18.273 | 28.928 | 34.456 | 1.00 | 0.00 |
| C      |     |     |     |   |        |        |        |      |      |
| HETATM | 957 | H31 | MYS | 7 | 19.361 | 28.899 | 34.519 | 1.00 | 0.00 |
| H      |     |     |     |   |        |        |        |      |      |
| HETATM | 958 | H32 | MYS | 7 | 17.744 | 28.164 | 35.025 | 1.00 | 0.00 |
| H      |     |     |     |   |        |        |        |      |      |
| HETATM | 959 | C20 | MYS | 7 | 17.942 | 30.215 | 35.141 | 1.00 | 0.00 |
| C      |     |     |     |   |        |        |        |      |      |
| HETATM | 960 | H33 | MYS | 7 | 18.440 | 31.051 | 34.651 | 1.00 | 0.00 |
| H      |     |     |     |   |        |        |        |      |      |
| HETATM | 961 | H34 | MYS | 7 | 16.873 | 30.374 | 34.994 | 1.00 | 0.00 |
| H      |     |     |     |   |        |        |        |      |      |
| HETATM | 962 | C21 | MYS | 7 | 18.268 | 30.065 | 36.642 | 1.00 | 0.00 |
| C      |     |     |     |   |        |        |        |      |      |
| HETATM | 963 | H35 | MYS | 7 | 17.623 | 29.267 | 37.009 | 1.00 | 0.00 |
| H      |     |     |     |   |        |        |        |      |      |
| HETATM | 964 | H36 | MYS | 7 | 19.315 | 29.765 | 36.683 | 1.00 | 0.00 |
| H      |     |     |     |   |        |        |        |      |      |
| HETATM | 965 | C22 | MYS | 7 | 18.215 | 31.315 | 37.547 | 1.00 | 0.00 |
| C      |     |     |     |   |        |        |        |      |      |
| HETATM | 966 | H37 | MYS | 7 | 19.021 | 32.000 | 37.284 | 1.00 | 0.00 |
| H      |     |     |     |   |        |        |        |      |      |
| HETATM | 967 | H38 | MYS | 7 | 17.256 | 31.829 | 37.472 | 1.00 | 0.00 |
| H      |     |     |     |   |        |        |        |      |      |
| HETATM | 968 | C23 | MYS | 7 | 18.477 | 31.014 | 38.986 | 1.00 | 0.00 |
| C      |     |     |     |   |        |        |        |      |      |
| HETATM | 969 | H39 | MYS | 7 | 17.855 | 30.155 | 39.240 | 1.00 | 0.00 |
| H      |     |     |     |   |        |        |        |      |      |
| HETATM | 970 | H40 | MYS | 7 | 19.512 | 30.686 | 39.078 | 1.00 | 0.00 |
| H      |     |     |     |   |        |        |        |      |      |
| HETATM | 971 | C24 | MYS | 7 | 18.080 | 32.322 | 39.698 | 1.00 | 0.00 |
| C      |     |     |     |   |        |        |        |      |      |
| HETATM | 972 | H41 | MYS | 7 | 16.994 | 32.383 | 39.773 | 1.00 | 0.00 |
| H      |     |     |     |   |        |        |        |      |      |
| HETATM | 973 | H42 | MYS | 7 | 18.547 | 33.175 | 39.206 | 1.00 | 0.00 |
| H      |     |     |     |   |        |        |        |      |      |
| HETATM | 974 | C25 | MYS | 7 | 18.683 | 32.202 | 41.117 | 1.00 | 0.00 |
| C      |     |     |     |   |        |        |        |      |      |
| HETATM | 975 | H43 | MYS | 7 | 19.766 | 32.098 | 41.184 | 1.00 | 0.00 |
| H      |     |     |     |   |        |        |        |      |      |
| HETATM | 976 | H44 | MYS | 7 | 18.490 | 33.181 | 41.558 | 1.00 | 0.00 |
| H      |     |     |     |   |        |        |        |      |      |
| HETATM | 977 | H45 | MYS | 7 | 18.287 | 31.307 | 41.596 | 1.00 | 0.00 |
| H      |     |     |     |   |        |        |        |      |      |
| HETATM | 978 | N3  | MYS | 7 | 20.676 | 34.492 | 13.684 | 1.00 | 0.00 |
| N      |     |     |     |   |        |        |        |      |      |
| HETATM | 979 | H46 | MYS | 7 | 20.142 | 35.328 | 13.874 | 1.00 | 0.00 |
| H      |     |     |     |   |        |        |        |      |      |

|        |      |     |     |   |        |        |        |      |      |
|--------|------|-----|-----|---|--------|--------|--------|------|------|
| HETATM | 980  | C26 | MYS | 7 | 21.014 | 34.174 | 12.334 | 1.00 | 0.00 |
| C      |      |     |     |   |        |        |        |      |      |
| HETATM | 981  | H47 | MYS | 7 | 21.992 | 33.695 | 12.298 | 1.00 | 0.00 |
| H      |      |     |     |   |        |        |        |      |      |
| HETATM | 982  | H48 | MYS | 7 | 20.966 | 35.073 | 11.719 | 1.00 | 0.00 |
| H      |      |     |     |   |        |        |        |      |      |
| HETATM | 983  | C27 | MYS | 7 | 19.947 | 33.205 | 11.756 | 1.00 | 0.00 |
| C      |      |     |     |   |        |        |        |      |      |
| HETATM | 984  | H49 | MYS | 7 | 19.023 | 33.784 | 11.749 | 1.00 | 0.00 |
| H      |      |     |     |   |        |        |        |      |      |
| HETATM | 985  | H50 | MYS | 7 | 19.846 | 32.300 | 12.356 | 1.00 | 0.00 |
| H      |      |     |     |   |        |        |        |      |      |
| HETATM | 986  | C28 | MYS | 7 | 20.229 | 32.865 | 10.248 | 1.00 | 0.00 |
| C      |      |     |     |   |        |        |        |      |      |
| HETATM | 987  | H51 | MYS | 7 | 21.209 | 32.414 | 10.095 | 1.00 | 0.00 |
| H      |      |     |     |   |        |        |        |      |      |
| HETATM | 988  | H52 | MYS | 7 | 20.367 | 33.842 | 9.784  | 1.00 | 0.00 |
| H      |      |     |     |   |        |        |        |      |      |
| HETATM | 989  | C29 | MYS | 7 | 19.000 | 32.263 | 9.568  | 1.00 | 0.00 |
| C      |      |     |     |   |        |        |        |      |      |
| HETATM | 990  | H53 | MYS | 7 | 18.149 | 32.838 | 9.932  | 1.00 | 0.00 |
| H      |      |     |     |   |        |        |        |      |      |
| HETATM | 991  | H54 | MYS | 7 | 18.740 | 31.264 | 9.917  | 1.00 | 0.00 |
| H      |      |     |     |   |        |        |        |      |      |
| HETATM | 992  | C30 | MYS | 7 | 19.183 | 32.438 | 8.004  | 1.00 | 0.00 |
| C      |      |     |     |   |        |        |        |      |      |
| HETATM | 993  | H55 | MYS | 7 | 19.398 | 33.492 | 7.827  | 1.00 | 0.00 |
| H      |      |     |     |   |        |        |        |      |      |
| HETATM | 994  | C31 | MYS | 7 | 20.409 | 31.687 | 7.414  | 1.00 | 0.00 |
| C      |      |     |     |   |        |        |        |      |      |
| HETATM | 995  | O6  | MYS | 7 | 20.726 | 30.595 | 7.841  | 1.00 | 0.00 |
| O      |      |     |     |   |        |        |        |      |      |
| HETATM | 996  | O7  | MYS | 7 | 21.039 | 32.310 | 6.475  | 1.00 | 0.00 |
| O      |      |     |     |   |        |        |        |      |      |
| HETATM | 997  | C32 | MYS | 7 | 22.299 | 31.892 | 6.017  | 1.00 | 0.00 |
| C      |      |     |     |   |        |        |        |      |      |
| HETATM | 998  | H56 | MYS | 7 | 22.417 | 30.808 | 6.018  | 1.00 | 0.00 |
| H      |      |     |     |   |        |        |        |      |      |
| HETATM | 999  | H57 | MYS | 7 | 23.098 | 32.494 | 6.450  | 1.00 | 0.00 |
| H      |      |     |     |   |        |        |        |      |      |
| HETATM | 1000 | C33 | MYS | 7 | 22.396 | 32.247 | 4.500  | 1.00 | 0.00 |
| C      |      |     |     |   |        |        |        |      |      |
| HETATM | 1001 | H58 | MYS | 7 | 21.720 | 31.536 | 4.024  | 1.00 | 0.00 |
| H      |      |     |     |   |        |        |        |      |      |
| HETATM | 1002 | H59 | MYS | 7 | 22.075 | 33.275 | 4.335  | 1.00 | 0.00 |
| H      |      |     |     |   |        |        |        |      |      |
| HETATM | 1003 | H60 | MYS | 7 | 23.427 | 32.237 | 4.145  | 1.00 | 0.00 |
| H      |      |     |     |   |        |        |        |      |      |
| HETATM | 1004 | N4  | MYS | 7 | 17.858 | 32.112 | 7.448  | 1.00 | 0.00 |
| N      |      |     |     |   |        |        |        |      |      |
| HETATM | 1005 | H61 | MYS | 7 | 17.320 | 32.878 | 7.068  | 1.00 | 0.00 |
| H      |      |     |     |   |        |        |        |      |      |
| HETATM | 1006 | C34 | MYS | 7 | 17.337 | 30.926 | 7.102  | 1.00 | 0.00 |
| C      |      |     |     |   |        |        |        |      |      |
| HETATM | 1007 | O8  | MYS | 7 | 17.937 | 29.883 | 7.300  | 1.00 | 0.00 |
| O      |      |     |     |   |        |        |        |      |      |

|        |      |     |     |   |        |        |       |      |      |
|--------|------|-----|-----|---|--------|--------|-------|------|------|
| HETATM | 1008 | C35 | MYS | 7 | 15.922 | 30.825 | 6.510 | 1.00 | 0.00 |
| C      |      |     |     |   |        |        |       |      |      |
| HETATM | 1009 | H62 | MYS | 7 | 15.871 | 31.650 | 5.799 | 1.00 | 0.00 |
| H      |      |     |     |   |        |        |       |      |      |
| HETATM | 1010 | H63 | MYS | 7 | 15.781 | 29.880 | 5.986 | 1.00 | 0.00 |
| H      |      |     |     |   |        |        |       |      |      |
| HETATM | 1011 | C36 | MYS | 7 | 14.881 | 30.759 | 7.590 | 1.00 | 0.00 |
| C      |      |     |     |   |        |        |       |      |      |
| HETATM | 1012 | H64 | MYS | 7 | 14.825 | 29.763 | 8.030 | 1.00 | 0.00 |
| H      |      |     |     |   |        |        |       |      |      |
| HETATM | 1013 | H65 | MYS | 7 | 15.011 | 31.433 | 8.437 | 1.00 | 0.00 |
| H      |      |     |     |   |        |        |       |      |      |
| HETATM | 1014 | C37 | MYS | 7 | 13.554 | 31.019 | 6.915 | 1.00 | 0.00 |
| C      |      |     |     |   |        |        |       |      |      |
| HETATM | 1015 | H66 | MYS | 7 | 13.569 | 31.963 | 6.371 | 1.00 | 0.00 |
| H      |      |     |     |   |        |        |       |      |      |
| HETATM | 1016 | H67 | MYS | 7 | 13.325 | 30.136 | 6.319 | 1.00 | 0.00 |
| H      |      |     |     |   |        |        |       |      |      |
| HETATM | 1017 | C38 | MYS | 7 | 12.466 | 31.138 | 8.030 | 1.00 | 0.00 |
| C      |      |     |     |   |        |        |       |      |      |
| HETATM | 1018 | H68 | MYS | 7 | 12.543 | 32.084 | 8.567 | 1.00 | 0.00 |
| H      |      |     |     |   |        |        |       |      |      |
| HETATM | 1019 | H69 | MYS | 7 | 12.512 | 30.290 | 8.712 | 1.00 | 0.00 |
| H      |      |     |     |   |        |        |       |      |      |
| HETATM | 1020 | C39 | MYS | 7 | 11.118 | 31.086 | 7.367 | 1.00 | 0.00 |
| C      |      |     |     |   |        |        |       |      |      |
| HETATM | 1021 | H70 | MYS | 7 | 11.003 | 31.922 | 6.677 | 1.00 | 0.00 |
| H      |      |     |     |   |        |        |       |      |      |
| HETATM | 1022 | H71 | MYS | 7 | 10.911 | 30.127 | 6.891 | 1.00 | 0.00 |
| H      |      |     |     |   |        |        |       |      |      |
| HETATM | 1023 | C40 | MYS | 7 | 10.162 | 31.332 | 8.581 | 1.00 | 0.00 |
| C      |      |     |     |   |        |        |       |      |      |
| HETATM | 1024 | H72 | MYS | 7 | 10.471 | 30.613 | 9.339 | 1.00 | 0.00 |
| H      |      |     |     |   |        |        |       |      |      |
| HETATM | 1025 | H73 | MYS | 7 | 10.164 | 32.358 | 8.948 | 1.00 | 0.00 |
| H      |      |     |     |   |        |        |       |      |      |
| HETATM | 1026 | C41 | MYS | 7 | 8.720  | 31.000 | 8.163 | 1.00 | 0.00 |
| C      |      |     |     |   |        |        |       |      |      |
| HETATM | 1027 | H74 | MYS | 7 | 8.435  | 31.341 | 7.167 | 1.00 | 0.00 |
| H      |      |     |     |   |        |        |       |      |      |
| HETATM | 1028 | H75 | MYS | 7 | 8.760  | 29.937 | 7.927 | 1.00 | 0.00 |
| H      |      |     |     |   |        |        |       |      |      |
| HETATM | 1029 | C42 | MYS | 7 | 7.608  | 31.484 | 9.132 | 1.00 | 0.00 |
| C      |      |     |     |   |        |        |       |      |      |
| HETATM | 1030 | H76 | MYS | 7 | 7.744  | 32.511 | 9.470 | 1.00 | 0.00 |
| H      |      |     |     |   |        |        |       |      |      |
| HETATM | 1031 | H77 | MYS | 7 | 7.559  | 30.781 | 9.964 | 1.00 | 0.00 |
| H      |      |     |     |   |        |        |       |      |      |
| HETATM | 1032 | C43 | MYS | 7 | 6.224  | 31.473 | 8.505 | 1.00 | 0.00 |
| C      |      |     |     |   |        |        |       |      |      |
| HETATM | 1033 | H78 | MYS | 7 | 6.286  | 32.180 | 7.677 | 1.00 | 0.00 |
| H      |      |     |     |   |        |        |       |      |      |
| HETATM | 1034 | H79 | MYS | 7 | 6.064  | 30.516 | 8.007 | 1.00 | 0.00 |
| H      |      |     |     |   |        |        |       |      |      |
| HETATM | 1035 | C44 | MYS | 7 | 5.256  | 31.767 | 9.576 | 1.00 | 0.00 |
| C      |      |     |     |   |        |        |       |      |      |



|        |      |     |     |   |        |        |        |      |      |
|--------|------|-----|-----|---|--------|--------|--------|------|------|
| HETATM | 1036 | H80 | MYS | 7 | 5.338  | 31.027 | 10.372 | 1.00 | 0.00 |
| H      |      |     |     |   |        |        |        |      |      |
| HETATM | 1037 | H81 | MYS | 7 | 5.494  | 32.742 | 10.002 | 1.00 | 0.00 |
| H      |      |     |     |   |        |        |        |      |      |
| HETATM | 1038 | C45 | MYS | 7 | 3.864  | 31.848 | 9.117  | 1.00 | 0.00 |
| C      |      |     |     |   |        |        |        |      |      |
| HETATM | 1039 | H82 | MYS | 7 | 3.690  | 32.750 | 8.531  | 1.00 | 0.00 |
| H      |      |     |     |   |        |        |        |      |      |
| HETATM | 1040 | H83 | MYS | 7 | 3.703  | 30.943 | 8.530  | 1.00 | 0.00 |
| H      |      |     |     |   |        |        |        |      |      |
| HETATM | 1041 | C46 | MYS | 7 | 2.831  | 31.875 | 10.301 | 1.00 | 0.00 |
| C      |      |     |     |   |        |        |        |      |      |
| HETATM | 1042 | H84 | MYS | 7 | 2.899  | 32.706 | 11.004 | 1.00 | 0.00 |
| H      |      |     |     |   |        |        |        |      |      |
| HETATM | 1043 | H85 | MYS | 7 | 2.940  | 30.955 | 10.874 | 1.00 | 0.00 |
| H      |      |     |     |   |        |        |        |      |      |
| HETATM | 1044 | C47 | MYS | 7 | 1.312  | 31.785 | 9.935  | 1.00 | 0.00 |
| C      |      |     |     |   |        |        |        |      |      |
| HETATM | 1045 | H86 | MYS | 7 | 0.796  | 31.514 | 10.856 | 1.00 | 0.00 |
| H      |      |     |     |   |        |        |        |      |      |
| HETATM | 1046 | H87 | MYS | 7 | 0.998  | 32.787 | 9.642  | 1.00 | 0.00 |
| H      |      |     |     |   |        |        |        |      |      |
| HETATM | 1047 | C48 | MYS | 7 | 0.936  | 30.737 | 8.969  | 1.00 | 0.00 |
| C      |      |     |     |   |        |        |        |      |      |
| HETATM | 1048 | H88 | MYS | 7 | 1.450  | 31.000 | 8.044  | 1.00 | 0.00 |
| H      |      |     |     |   |        |        |        |      |      |
| HETATM | 1049 | H89 | MYS | 7 | 1.179  | 29.787 | 9.444  | 1.00 | 0.00 |
| H      |      |     |     |   |        |        |        |      |      |
| HETATM | 1050 | H90 | MYS | 7 | -0.133 | 30.685 | 8.762  | 1.00 | 0.00 |
| H      |      |     |     |   |        |        |        |      |      |
| HETATM | 1051 | C1  | MYS | 8 | 16.598 | 37.150 | 14.236 | 1.00 | 0.00 |
| C      |      |     |     |   |        |        |        |      |      |
| HETATM | 1052 | O1  | MYS | 8 | 15.506 | 37.560 | 13.966 | 1.00 | 0.00 |
| O      |      |     |     |   |        |        |        |      |      |
| HETATM | 1053 | C2  | MYS | 8 | 17.841 | 37.179 | 13.223 | 1.00 | 0.00 |
| C      |      |     |     |   |        |        |        |      |      |
| HETATM | 1054 | O2  | MYS | 8 | 18.981 | 36.768 | 13.604 | 1.00 | 0.00 |
| O      |      |     |     |   |        |        |        |      |      |
| HETATM | 1055 | N1  | MYS | 8 | 16.943 | 36.666 | 15.413 | 1.00 | 0.00 |
| N      |      |     |     |   |        |        |        |      |      |
| HETATM | 1056 | H1  | MYS | 8 | 17.903 | 36.399 | 15.579 | 1.00 | 0.00 |
| H      |      |     |     |   |        |        |        |      |      |
| HETATM | 1057 | C3  | MYS | 8 | 16.000 | 36.601 | 16.581 | 1.00 | 0.00 |
| C      |      |     |     |   |        |        |        |      |      |
| HETATM | 1058 | H2  | MYS | 8 | 15.705 | 35.569 | 16.767 | 1.00 | 0.00 |
| H      |      |     |     |   |        |        |        |      |      |
| HETATM | 1059 | H3  | MYS | 8 | 15.138 | 37.190 | 16.266 | 1.00 | 0.00 |
| H      |      |     |     |   |        |        |        |      |      |
| HETATM | 1060 | C4  | MYS | 8 | 16.722 | 37.163 | 17.790 | 1.00 | 0.00 |
| C      |      |     |     |   |        |        |        |      |      |
| HETATM | 1061 | H4  | MYS | 8 | 16.947 | 38.213 | 17.604 | 1.00 | 0.00 |
| H      |      |     |     |   |        |        |        |      |      |
| HETATM | 1062 | H5  | MYS | 8 | 17.690 | 36.661 | 17.793 | 1.00 | 0.00 |
| H      |      |     |     |   |        |        |        |      |      |
| HETATM | 1063 | C5  | MYS | 8 | 15.906 | 36.989 | 19.051 | 1.00 | 0.00 |
| C      |      |     |     |   |        |        |        |      |      |

|        |      |     |     |   |        |        |        |      |      |
|--------|------|-----|-----|---|--------|--------|--------|------|------|
| HETATM | 1064 | H6  | MYS | 8 | 14.875 | 37.274 | 18.842 | 1.00 | 0.00 |
| H      |      |     |     |   |        |        |        |      |      |
| HETATM | 1065 | H7  | MYS | 8 | 16.501 | 37.575 | 19.752 | 1.00 | 0.00 |
| H      |      |     |     |   |        |        |        |      |      |
| HETATM | 1066 | C6  | MYS | 8 | 15.864 | 35.531 | 19.554 | 1.00 | 0.00 |
| C      |      |     |     |   |        |        |        |      |      |
| HETATM | 1067 | H8  | MYS | 8 | 16.803 | 35.211 | 20.006 | 1.00 | 0.00 |
| H      |      |     |     |   |        |        |        |      |      |
| HETATM | 1068 | H9  | MYS | 8 | 15.520 | 34.890 | 18.742 | 1.00 | 0.00 |
| H      |      |     |     |   |        |        |        |      |      |
| HETATM | 1069 | C7  | MYS | 8 | 14.839 | 35.307 | 20.704 | 1.00 | 0.00 |
| C      |      |     |     |   |        |        |        |      |      |
| HETATM | 1070 | H10 | MYS | 8 | 15.174 | 35.928 | 21.535 | 1.00 | 0.00 |
| H      |      |     |     |   |        |        |        |      |      |
| HETATM | 1071 | C8  | MYS | 8 | 13.378 | 35.657 | 20.382 | 1.00 | 0.00 |
| C      |      |     |     |   |        |        |        |      |      |
| HETATM | 1072 | O3  | MYS | 8 | 13.035 | 35.783 | 19.203 | 1.00 | 0.00 |
| O      |      |     |     |   |        |        |        |      |      |
| HETATM | 1073 | O4  | MYS | 8 | 12.532 | 35.618 | 21.369 | 1.00 | 0.00 |
| O      |      |     |     |   |        |        |        |      |      |
| HETATM | 1074 | C9  | MYS | 8 | 11.119 | 35.765 | 21.181 | 1.00 | 0.00 |
| C      |      |     |     |   |        |        |        |      |      |
| HETATM | 1075 | H11 | MYS | 8 | 10.623 | 35.137 | 21.921 | 1.00 | 0.00 |
| H      |      |     |     |   |        |        |        |      |      |
| HETATM | 1076 | H12 | MYS | 8 | 10.757 | 35.521 | 20.182 | 1.00 | 0.00 |
| H      |      |     |     |   |        |        |        |      |      |
| HETATM | 1077 | C10 | MYS | 8 | 10.669 | 37.213 | 21.521 | 1.00 | 0.00 |
| C      |      |     |     |   |        |        |        |      |      |
| HETATM | 1078 | H13 | MYS | 8 | 9.630  | 37.417 | 21.263 | 1.00 | 0.00 |
| H      |      |     |     |   |        |        |        |      |      |
| HETATM | 1079 | H14 | MYS | 8 | 10.848 | 37.405 | 22.579 | 1.00 | 0.00 |
| H      |      |     |     |   |        |        |        |      |      |
| HETATM | 1080 | H15 | MYS | 8 | 11.365 | 37.824 | 20.947 | 1.00 | 0.00 |
| H      |      |     |     |   |        |        |        |      |      |
| HETATM | 1081 | N2  | MYS | 8 | 14.955 | 33.947 | 21.282 | 1.00 | 0.00 |
| N      |      |     |     |   |        |        |        |      |      |
| HETATM | 1082 | H16 | MYS | 8 | 15.424 | 33.806 | 22.165 | 1.00 | 0.00 |
| H      |      |     |     |   |        |        |        |      |      |
| HETATM | 1083 | C11 | MYS | 8 | 14.345 | 32.806 | 20.815 | 1.00 | 0.00 |
| C      |      |     |     |   |        |        |        |      |      |
| HETATM | 1084 | O5  | MYS | 8 | 13.697 | 32.867 | 19.774 | 1.00 | 0.00 |
| O      |      |     |     |   |        |        |        |      |      |
| HETATM | 1085 | C12 | MYS | 8 | 14.453 | 31.563 | 21.532 | 1.00 | 0.00 |
| C      |      |     |     |   |        |        |        |      |      |
| HETATM | 1086 | H17 | MYS | 8 | 14.356 | 31.820 | 22.587 | 1.00 | 0.00 |
| H      |      |     |     |   |        |        |        |      |      |
| HETATM | 1087 | H18 | MYS | 8 | 13.611 | 30.915 | 21.292 | 1.00 | 0.00 |
| H      |      |     |     |   |        |        |        |      |      |
| HETATM | 1088 | C13 | MYS | 8 | 15.724 | 30.788 | 21.153 | 1.00 | 0.00 |
| C      |      |     |     |   |        |        |        |      |      |
| HETATM | 1089 | H19 | MYS | 8 | 15.704 | 30.472 | 20.110 | 1.00 | 0.00 |
| H      |      |     |     |   |        |        |        |      |      |
| HETATM | 1090 | H20 | MYS | 8 | 16.618 | 31.377 | 21.359 | 1.00 | 0.00 |
| H      |      |     |     |   |        |        |        |      |      |
| HETATM | 1091 | C14 | MYS | 8 | 15.585 | 29.467 | 22.093 | 1.00 | 0.00 |
| C      |      |     |     |   |        |        |        |      |      |

|        |      |     |     |   |        |        |        |      |      |
|--------|------|-----|-----|---|--------|--------|--------|------|------|
| HETATM | 1092 | H21 | MYS | 8 | 15.170 | 29.716 | 23.069 | 1.00 | 0.00 |
| H      |      |     |     |   |        |        |        |      |      |
| HETATM | 1093 | H22 | MYS | 8 | 14.768 | 28.811 | 21.794 | 1.00 | 0.00 |
| H      |      |     |     |   |        |        |        |      |      |
| HETATM | 1094 | C15 | MYS | 8 | 16.926 | 28.662 | 22.163 | 1.00 | 0.00 |
| C      |      |     |     |   |        |        |        |      |      |
| HETATM | 1095 | H23 | MYS | 8 | 17.063 | 27.906 | 21.390 | 1.00 | 0.00 |
| H      |      |     |     |   |        |        |        |      |      |
| HETATM | 1096 | H24 | MYS | 8 | 17.749 | 29.352 | 21.979 | 1.00 | 0.00 |
| H      |      |     |     |   |        |        |        |      |      |
| HETATM | 1097 | C16 | MYS | 8 | 17.119 | 27.911 | 23.478 | 1.00 | 0.00 |
| C      |      |     |     |   |        |        |        |      |      |
| HETATM | 1098 | H25 | MYS | 8 | 16.888 | 28.515 | 24.356 | 1.00 | 0.00 |
| H      |      |     |     |   |        |        |        |      |      |
| HETATM | 1099 | H26 | MYS | 8 | 16.391 | 27.101 | 23.432 | 1.00 | 0.00 |
| H      |      |     |     |   |        |        |        |      |      |
| HETATM | 1100 | C17 | MYS | 8 | 18.552 | 27.250 | 23.654 | 1.00 | 0.00 |
| C      |      |     |     |   |        |        |        |      |      |
| HETATM | 1101 | H27 | MYS | 8 | 18.852 | 26.723 | 22.748 | 1.00 | 0.00 |
| H      |      |     |     |   |        |        |        |      |      |
| HETATM | 1102 | H28 | MYS | 8 | 19.254 | 28.082 | 23.725 | 1.00 | 0.00 |
| H      |      |     |     |   |        |        |        |      |      |
| HETATM | 1103 | C18 | MYS | 8 | 18.603 | 26.155 | 24.735 | 1.00 | 0.00 |
| C      |      |     |     |   |        |        |        |      |      |
| HETATM | 1104 | H29 | MYS | 8 | 17.803 | 25.462 | 24.476 | 1.00 | 0.00 |
| H      |      |     |     |   |        |        |        |      |      |
| HETATM | 1105 | H30 | MYS | 8 | 19.486 | 25.526 | 24.623 | 1.00 | 0.00 |
| H      |      |     |     |   |        |        |        |      |      |
| HETATM | 1106 | C19 | MYS | 8 | 18.338 | 26.775 | 26.170 | 1.00 | 0.00 |
| C      |      |     |     |   |        |        |        |      |      |
| HETATM | 1107 | H31 | MYS | 8 | 17.286 | 27.062 | 26.192 | 1.00 | 0.00 |
| H      |      |     |     |   |        |        |        |      |      |
| HETATM | 1108 | H32 | MYS | 8 | 19.069 | 27.581 | 26.226 | 1.00 | 0.00 |
| H      |      |     |     |   |        |        |        |      |      |
| HETATM | 1109 | C20 | MYS | 8 | 18.707 | 25.681 | 27.207 | 1.00 | 0.00 |
| C      |      |     |     |   |        |        |        |      |      |
| HETATM | 1110 | H33 | MYS | 8 | 17.950 | 24.901 | 27.288 | 1.00 | 0.00 |
| H      |      |     |     |   |        |        |        |      |      |
| HETATM | 1111 | H34 | MYS | 8 | 19.662 | 25.234 | 26.933 | 1.00 | 0.00 |
| H      |      |     |     |   |        |        |        |      |      |
| HETATM | 1112 | C21 | MYS | 8 | 18.783 | 26.338 | 28.587 | 1.00 | 0.00 |
| C      |      |     |     |   |        |        |        |      |      |
| HETATM | 1113 | H35 | MYS | 8 | 19.499 | 27.156 | 28.504 | 1.00 | 0.00 |
| H      |      |     |     |   |        |        |        |      |      |
| HETATM | 1114 | H36 | MYS | 8 | 17.779 | 26.711 | 28.788 | 1.00 | 0.00 |
| H      |      |     |     |   |        |        |        |      |      |
| HETATM | 1115 | C22 | MYS | 8 | 19.215 | 25.327 | 29.703 | 1.00 | 0.00 |
| C      |      |     |     |   |        |        |        |      |      |
| HETATM | 1116 | H37 | MYS | 8 | 18.566 | 24.452 | 29.658 | 1.00 | 0.00 |
| H      |      |     |     |   |        |        |        |      |      |
| HETATM | 1117 | H38 | MYS | 8 | 20.250 | 25.032 | 29.531 | 1.00 | 0.00 |
| H      |      |     |     |   |        |        |        |      |      |
| HETATM | 1118 | C23 | MYS | 8 | 19.083 | 25.979 | 31.056 | 1.00 | 0.00 |
| C      |      |     |     |   |        |        |        |      |      |
| HETATM | 1119 | H39 | MYS | 8 | 19.703 | 26.873 | 30.993 | 1.00 | 0.00 |
| H      |      |     |     |   |        |        |        |      |      |

|        |      |     |     |   |        |        |        |      |      |
|--------|------|-----|-----|---|--------|--------|--------|------|------|
| HETATM | 1120 | H40 | MYS | 8 | 18.052 | 26.269 | 31.263 | 1.00 | 0.00 |
| H      |      |     |     |   |        |        |        |      |      |
| HETATM | 1121 | C24 | MYS | 8 | 19.797 | 25.030 | 32.045 | 1.00 | 0.00 |
| C      |      |     |     |   |        |        |        |      |      |
| HETATM | 1122 | H41 | MYS | 8 | 20.873 | 25.108 | 31.886 | 1.00 | 0.00 |
| H      |      |     |     |   |        |        |        |      |      |
| HETATM | 1123 | H42 | MYS | 8 | 19.339 | 24.049 | 31.918 | 1.00 | 0.00 |
| H      |      |     |     |   |        |        |        |      |      |
| HETATM | 1124 | C25 | MYS | 8 | 19.743 | 25.450 | 33.520 | 1.00 | 0.00 |
| C      |      |     |     |   |        |        |        |      |      |
| HETATM | 1125 | H43 | MYS | 8 | 19.841 | 24.578 | 34.166 | 1.00 | 0.00 |
| H      |      |     |     |   |        |        |        |      |      |
| HETATM | 1126 | H44 | MYS | 8 | 20.479 | 26.250 | 33.598 | 1.00 | 0.00 |
| H      |      |     |     |   |        |        |        |      |      |
| HETATM | 1127 | H45 | MYS | 8 | 18.774 | 25.906 | 33.722 | 1.00 | 0.00 |
| H      |      |     |     |   |        |        |        |      |      |
| HETATM | 1128 | N3  | MYS | 8 | 17.618 | 37.621 | 11.921 | 1.00 | 0.00 |
| N      |      |     |     |   |        |        |        |      |      |
| HETATM | 1129 | H46 | MYS | 8 | 16.693 | 37.951 | 11.685 | 1.00 | 0.00 |
| H      |      |     |     |   |        |        |        |      |      |
| HETATM | 1130 | C26 | MYS | 8 | 18.620 | 37.751 | 10.880 | 1.00 | 0.00 |
| C      |      |     |     |   |        |        |        |      |      |
| HETATM | 1131 | H47 | MYS | 8 | 19.572 | 37.803 | 11.408 | 1.00 | 0.00 |
| H      |      |     |     |   |        |        |        |      |      |
| HETATM | 1132 | H48 | MYS | 8 | 18.475 | 38.718 | 10.397 | 1.00 | 0.00 |
| H      |      |     |     |   |        |        |        |      |      |
| HETATM | 1133 | C27 | MYS | 8 | 18.680 | 36.540 | 9.920  | 1.00 | 0.00 |
| C      |      |     |     |   |        |        |        |      |      |
| HETATM | 1134 | H49 | MYS | 8 | 18.709 | 35.600 | 10.470 | 1.00 | 0.00 |
| H      |      |     |     |   |        |        |        |      |      |
| HETATM | 1135 | H50 | MYS | 8 | 19.510 | 36.745 | 9.243  | 1.00 | 0.00 |
| H      |      |     |     |   |        |        |        |      |      |
| HETATM | 1136 | C28 | MYS | 8 | 17.447 | 36.665 | 8.911  | 1.00 | 0.00 |
| C      |      |     |     |   |        |        |        |      |      |
| HETATM | 1137 | H51 | MYS | 8 | 17.523 | 37.668 | 8.490  | 1.00 | 0.00 |
| H      |      |     |     |   |        |        |        |      |      |
| HETATM | 1138 | H52 | MYS | 8 | 16.490 | 36.604 | 9.428  | 1.00 | 0.00 |
| H      |      |     |     |   |        |        |        |      |      |
| HETATM | 1139 | C29 | MYS | 8 | 17.560 | 35.545 | 7.876  | 1.00 | 0.00 |
| C      |      |     |     |   |        |        |        |      |      |
| HETATM | 1140 | H53 | MYS | 8 | 17.192 | 34.605 | 8.288  | 1.00 | 0.00 |
| H      |      |     |     |   |        |        |        |      |      |
| HETATM | 1141 | H54 | MYS | 8 | 18.575 | 35.263 | 7.594  | 1.00 | 0.00 |
| H      |      |     |     |   |        |        |        |      |      |
| HETATM | 1142 | C30 | MYS | 8 | 16.847 | 35.998 | 6.588  | 1.00 | 0.00 |
| C      |      |     |     |   |        |        |        |      |      |
| HETATM | 1143 | H55 | MYS | 8 | 17.190 | 37.027 | 6.481  | 1.00 | 0.00 |
| H      |      |     |     |   |        |        |        |      |      |
| HETATM | 1144 | C31 | MYS | 8 | 17.296 | 35.191 | 5.400  | 1.00 | 0.00 |
| C      |      |     |     |   |        |        |        |      |      |
| HETATM | 1145 | O6  | MYS | 8 | 17.460 | 34.009 | 5.381  | 1.00 | 0.00 |
| O      |      |     |     |   |        |        |        |      |      |
| HETATM | 1146 | O7  | MYS | 8 | 17.546 | 35.950 | 4.347  | 1.00 | 0.00 |
| O      |      |     |     |   |        |        |        |      |      |
| HETATM | 1147 | C32 | MYS | 8 | 18.085 | 35.400 | 3.171  | 1.00 | 0.00 |
| C      |      |     |     |   |        |        |        |      |      |

|        |      |     |     |   |        |        |        |      |      |
|--------|------|-----|-----|---|--------|--------|--------|------|------|
| HETATM | 1148 | H56 | MYS | 8 | 18.758 | 34.548 | 3.263  | 1.00 | 0.00 |
| H      |      |     |     |   |        |        |        |      |      |
| HETATM | 1149 | H57 | MYS | 8 | 18.529 | 36.215 | 2.600  | 1.00 | 0.00 |
| H      |      |     |     |   |        |        |        |      |      |
| HETATM | 1150 | C33 | MYS | 8 | 16.978 | 34.798 | 2.249  | 1.00 | 0.00 |
| C      |      |     |     |   |        |        |        |      |      |
| HETATM | 1151 | H58 | MYS | 8 | 16.320 | 35.570 | 1.850  | 1.00 | 0.00 |
| H      |      |     |     |   |        |        |        |      |      |
| HETATM | 1152 | H59 | MYS | 8 | 17.394 | 34.218 | 1.425  | 1.00 | 0.00 |
| H      |      |     |     |   |        |        |        |      |      |
| HETATM | 1153 | H60 | MYS | 8 | 16.339 | 34.127 | 2.822  | 1.00 | 0.00 |
| H      |      |     |     |   |        |        |        |      |      |
| HETATM | 1154 | N4  | MYS | 8 | 15.403 | 36.035 | 6.707  | 1.00 | 0.00 |
| N      |      |     |     |   |        |        |        |      |      |
| HETATM | 1155 | H61 | MYS | 8 | 14.947 | 36.904 | 6.467  | 1.00 | 0.00 |
| H      |      |     |     |   |        |        |        |      |      |
| HETATM | 1156 | C34 | MYS | 8 | 14.602 | 34.959 | 6.761  | 1.00 | 0.00 |
| C      |      |     |     |   |        |        |        |      |      |
| HETATM | 1157 | O8  | MYS | 8 | 15.035 | 33.886 | 6.976  | 1.00 | 0.00 |
| O      |      |     |     |   |        |        |        |      |      |
| HETATM | 1158 | C35 | MYS | 8 | 13.115 | 35.187 | 6.620  | 1.00 | 0.00 |
| C      |      |     |     |   |        |        |        |      |      |
| HETATM | 1159 | H62 | MYS | 8 | 12.875 | 36.135 | 6.138  | 1.00 | 0.00 |
| H      |      |     |     |   |        |        |        |      |      |
| HETATM | 1160 | H63 | MYS | 8 | 12.688 | 34.245 | 6.275  | 1.00 | 0.00 |
| H      |      |     |     |   |        |        |        |      |      |
| HETATM | 1161 | C36 | MYS | 8 | 12.539 | 35.348 | 7.996  | 1.00 | 0.00 |
| C      |      |     |     |   |        |        |        |      |      |
| HETATM | 1162 | H64 | MYS | 8 | 12.643 | 34.361 | 8.446  | 1.00 | 0.00 |
| H      |      |     |     |   |        |        |        |      |      |
| HETATM | 1163 | H65 | MYS | 8 | 13.236 | 35.986 | 8.539  | 1.00 | 0.00 |
| H      |      |     |     |   |        |        |        |      |      |
| HETATM | 1164 | C37 | MYS | 8 | 11.096 | 35.948 | 7.850  | 1.00 | 0.00 |
| C      |      |     |     |   |        |        |        |      |      |
| HETATM | 1165 | H66 | MYS | 8 | 11.213 | 36.875 | 7.289  | 1.00 | 0.00 |
| H      |      |     |     |   |        |        |        |      |      |
| HETATM | 1166 | H67 | MYS | 8 | 10.504 | 35.221 | 7.293  | 1.00 | 0.00 |
| H      |      |     |     |   |        |        |        |      |      |
| HETATM | 1167 | C38 | MYS | 8 | 10.323 | 36.167 | 9.128  | 1.00 | 0.00 |
| C      |      |     |     |   |        |        |        |      |      |
| HETATM | 1168 | H68 | MYS | 8 | 10.741 | 37.021 | 9.660  | 1.00 | 0.00 |
| H      |      |     |     |   |        |        |        |      |      |
| HETATM | 1169 | H69 | MYS | 8 | 10.352 | 35.302 | 9.792  | 1.00 | 0.00 |
| H      |      |     |     |   |        |        |        |      |      |
| HETATM | 1170 | C39 | MYS | 8 | 8.895  | 36.498 | 8.760  | 1.00 | 0.00 |
| C      |      |     |     |   |        |        |        |      |      |
| HETATM | 1171 | H70 | MYS | 8 | 8.913  | 37.529 | 8.407  | 1.00 | 0.00 |
| H      |      |     |     |   |        |        |        |      |      |
| HETATM | 1172 | H71 | MYS | 8 | 8.643  | 35.842 | 7.927  | 1.00 | 0.00 |
| H      |      |     |     |   |        |        |        |      |      |
| HETATM | 1173 | C40 | MYS | 8 | 7.790  | 36.356 | 9.730  | 1.00 | 0.00 |
| C      |      |     |     |   |        |        |        |      |      |
| HETATM | 1174 | H72 | MYS | 8 | 7.922  | 35.353 | 10.137 | 1.00 | 0.00 |
| H      |      |     |     |   |        |        |        |      |      |
| HETATM | 1175 | H73 | MYS | 8 | 7.864  | 37.136 | 10.488 | 1.00 | 0.00 |
| H      |      |     |     |   |        |        |        |      |      |

|        |      |     |     |   |        |        |        |      |      |
|--------|------|-----|-----|---|--------|--------|--------|------|------|
| HETATM | 1176 | C41 | MYS | 8 | 6.379  | 36.568 | 9.127  | 1.00 | 0.00 |
| C      |      |     |     |   |        |        |        |      |      |
| HETATM | 1177 | H74 | MYS | 8 | 6.174  | 37.513 | 8.623  | 1.00 | 0.00 |
| H      |      |     |     |   |        |        |        |      |      |
| HETATM | 1178 | H75 | MYS | 8 | 6.373  | 35.679 | 8.496  | 1.00 | 0.00 |
| H      |      |     |     |   |        |        |        |      |      |
| HETATM | 1179 | C42 | MYS | 8 | 5.319  | 36.433 | 10.298 | 1.00 | 0.00 |
| C      |      |     |     |   |        |        |        |      |      |
| HETATM | 1180 | H76 | MYS | 8 | 5.395  | 37.307 | 10.944 | 1.00 | 0.00 |
| H      |      |     |     |   |        |        |        |      |      |
| HETATM | 1181 | H77 | MYS | 8 | 5.297  | 35.443 | 10.754 | 1.00 | 0.00 |
| H      |      |     |     |   |        |        |        |      |      |
| HETATM | 1182 | C43 | MYS | 8 | 3.955  | 36.570 | 9.594  | 1.00 | 0.00 |
| C      |      |     |     |   |        |        |        |      |      |
| HETATM | 1183 | H78 | MYS | 8 | 3.775  | 37.589 | 9.253  | 1.00 | 0.00 |
| H      |      |     |     |   |        |        |        |      |      |
| HETATM | 1184 | H79 | MYS | 8 | 3.888  | 35.932 | 8.712  | 1.00 | 0.00 |
| H      |      |     |     |   |        |        |        |      |      |
| HETATM | 1185 | C44 | MYS | 8 | 2.765  | 36.071 | 10.492 | 1.00 | 0.00 |
| C      |      |     |     |   |        |        |        |      |      |
| HETATM | 1186 | H80 | MYS | 8 | 1.808  | 36.414 | 10.099 | 1.00 | 0.00 |
| H      |      |     |     |   |        |        |        |      |      |
| HETATM | 1187 | H81 | MYS | 8 | 2.830  | 34.983 | 10.535 | 1.00 | 0.00 |
| H      |      |     |     |   |        |        |        |      |      |
| HETATM | 1188 | C45 | MYS | 8 | 2.898  | 36.673 | 11.926 | 1.00 | 0.00 |
| C      |      |     |     |   |        |        |        |      |      |
| HETATM | 1189 | H82 | MYS | 8 | 3.733  | 36.339 | 12.543 | 1.00 | 0.00 |
| H      |      |     |     |   |        |        |        |      |      |
| HETATM | 1190 | H83 | MYS | 8 | 2.907  | 37.749 | 11.754 | 1.00 | 0.00 |
| H      |      |     |     |   |        |        |        |      |      |
| HETATM | 1191 | C46 | MYS | 8 | 1.662  | 36.141 | 12.749 | 1.00 | 0.00 |
| C      |      |     |     |   |        |        |        |      |      |
| HETATM | 1192 | H84 | MYS | 8 | 1.682  | 35.055 | 12.668 | 1.00 | 0.00 |
| H      |      |     |     |   |        |        |        |      |      |
| HETATM | 1193 | H85 | MYS | 8 | 0.728  | 36.449 | 12.277 | 1.00 | 0.00 |
| H      |      |     |     |   |        |        |        |      |      |
| HETATM | 1194 | C47 | MYS | 8 | 1.586  | 36.541 | 14.173 | 1.00 | 0.00 |
| C      |      |     |     |   |        |        |        |      |      |
| HETATM | 1195 | H86 | MYS | 8 | 0.729  | 36.024 | 14.605 | 1.00 | 0.00 |
| H      |      |     |     |   |        |        |        |      |      |
| HETATM | 1196 | H87 | MYS | 8 | 2.525  | 36.369 | 14.699 | 1.00 | 0.00 |
| H      |      |     |     |   |        |        |        |      |      |
| HETATM | 1197 | C48 | MYS | 8 | 1.310  | 38.058 | 14.153 | 1.00 | 0.00 |
| C      |      |     |     |   |        |        |        |      |      |
| HETATM | 1198 | H88 | MYS | 8 | 1.184  | 38.339 | 15.199 | 1.00 | 0.00 |
| H      |      |     |     |   |        |        |        |      |      |
| HETATM | 1199 | H89 | MYS | 8 | 2.239  | 38.532 | 13.838 | 1.00 | 0.00 |
| H      |      |     |     |   |        |        |        |      |      |
| HETATM | 1200 | H90 | MYS | 8 | 0.431  | 38.255 | 13.539 | 1.00 | 0.00 |
| H      |      |     |     |   |        |        |        |      |      |
| HETATM | 1201 | O1  | PRP | 9 | 21.686 | 22.429 | 45.096 | 1.00 | 0.00 |
| O      |      |     |     |   |        |        |        |      |      |
| HETATM | 1202 | H1  | PRP | 9 | 21.440 | 21.505 | 45.016 | 1.00 | 0.00 |
| H      |      |     |     |   |        |        |        |      |      |
| HETATM | 1203 | C1  | PRP | 9 | 20.832 | 23.175 | 45.986 | 1.00 | 0.00 |
| C      |      |     |     |   |        |        |        |      |      |

|        |      |    |     |    |        |        |        |      |      |
|--------|------|----|-----|----|--------|--------|--------|------|------|
| HETATM | 1204 | H2 | PRP | 9  | 19.818 | 23.274 | 45.600 | 1.00 | 0.00 |
| H      |      |    |     |    |        |        |        |      |      |
| HETATM | 1205 | H3 | PRP | 9  | 20.862 | 22.771 | 46.998 | 1.00 | 0.00 |
| H      |      |    |     |    |        |        |        |      |      |
| HETATM | 1206 | C2 | PRP | 9  | 21.303 | 24.593 | 46.119 | 1.00 | 0.00 |
| C      |      |    |     |    |        |        |        |      |      |
| HETATM | 1207 | H4 | PRP | 9  | 20.720 | 25.186 | 46.824 | 1.00 | 0.00 |
| H      |      |    |     |    |        |        |        |      |      |
| HETATM | 1208 | O2 | PRP | 9  | 21.597 | 25.197 | 44.824 | 1.00 | 0.00 |
| O      |      |    |     |    |        |        |        |      |      |
| HETATM | 1209 | H5 | PRP | 9  | 21.792 | 24.465 | 44.234 | 1.00 | 0.00 |
| H      |      |    |     |    |        |        |        |      |      |
| HETATM | 1210 | C3 | PRP | 9  | 22.670 | 24.728 | 46.818 | 1.00 | 0.00 |
| C      |      |    |     |    |        |        |        |      |      |
| HETATM | 1211 | H6 | PRP | 9  | 23.421 | 24.241 | 46.196 | 1.00 | 0.00 |
| H      |      |    |     |    |        |        |        |      |      |
| HETATM | 1212 | H7 | PRP | 9  | 22.775 | 25.813 | 46.821 | 1.00 | 0.00 |
| H      |      |    |     |    |        |        |        |      |      |
| HETATM | 1213 | H8 | PRP | 9  | 22.608 | 24.359 | 47.841 | 1.00 | 0.00 |
| H      |      |    |     |    |        |        |        |      |      |
| HETATM | 1214 | O1 | PRP | 10 | 12.549 | 28.989 | 43.006 | 1.00 | 0.00 |
| O      |      |    |     |    |        |        |        |      |      |
| HETATM | 1215 | H1 | PRP | 10 | 13.220 | 29.653 | 43.179 | 1.00 | 0.00 |
| H      |      |    |     |    |        |        |        |      |      |
| HETATM | 1216 | C1 | PRP | 10 | 12.460 | 28.786 | 41.596 | 1.00 | 0.00 |
| C      |      |    |     |    |        |        |        |      |      |
| HETATM | 1217 | H2 | PRP | 10 | 11.869 | 27.892 | 41.396 | 1.00 | 0.00 |
| H      |      |    |     |    |        |        |        |      |      |
| HETATM | 1218 | H3 | PRP | 10 | 12.061 | 29.654 | 41.070 | 1.00 | 0.00 |
| H      |      |    |     |    |        |        |        |      |      |
| HETATM | 1219 | C2 | PRP | 10 | 13.904 | 28.519 | 41.082 | 1.00 | 0.00 |
| C      |      |    |     |    |        |        |        |      |      |
| HETATM | 1220 | H4 | PRP | 10 | 14.427 | 27.769 | 41.675 | 1.00 | 0.00 |
| H      |      |    |     |    |        |        |        |      |      |
| HETATM | 1221 | O2 | PRP | 10 | 14.669 | 29.727 | 41.157 | 1.00 | 0.00 |
| O      |      |    |     |    |        |        |        |      |      |
| HETATM | 1222 | H5 | PRP | 10 | 15.544 | 29.465 | 40.861 | 1.00 | 0.00 |
| H      |      |    |     |    |        |        |        |      |      |
| HETATM | 1223 | C3 | PRP | 10 | 13.842 | 28.039 | 39.592 | 1.00 | 0.00 |
| C      |      |    |     |    |        |        |        |      |      |
| HETATM | 1224 | H6 | PRP | 10 | 13.336 | 27.080 | 39.706 | 1.00 | 0.00 |
| H      |      |    |     |    |        |        |        |      |      |
| HETATM | 1225 | H7 | PRP | 10 | 13.213 | 28.615 | 38.913 | 1.00 | 0.00 |
| H      |      |    |     |    |        |        |        |      |      |
| HETATM | 1226 | H8 | PRP | 10 | 14.789 | 27.988 | 39.054 | 1.00 | 0.00 |
| H      |      |    |     |    |        |        |        |      |      |
| HETATM | 1227 | O1 | PRP | 11 | 8.103  | 20.074 | 52.849 | 1.00 | 0.00 |
| O      |      |    |     |    |        |        |        |      |      |
| HETATM | 1228 | H1 | PRP | 11 | 8.344  | 19.746 | 53.719 | 1.00 | 0.00 |
| H      |      |    |     |    |        |        |        |      |      |
| HETATM | 1229 | C1 | PRP | 11 | 8.294  | 19.097 | 51.859 | 1.00 | 0.00 |
| C      |      |    |     |    |        |        |        |      |      |
| HETATM | 1230 | H2 | PRP | 11 | 7.793  | 18.137 | 51.985 | 1.00 | 0.00 |
| H      |      |    |     |    |        |        |        |      |      |
| HETATM | 1231 | H3 | PRP | 11 | 7.972  | 19.587 | 50.941 | 1.00 | 0.00 |
| H      |      |    |     |    |        |        |        |      |      |

|        |      |    |     |    |        |        |        |      |      |
|--------|------|----|-----|----|--------|--------|--------|------|------|
| HETATM | 1232 | C2 | PRP | 11 | 9.798  | 18.916 | 51.770 | 1.00 | 0.00 |
| C      |      |    |     |    |        |        |        |      |      |
| HETATM | 1233 | H4 | PRP | 11 | 10.182 | 18.754 | 52.777 | 1.00 | 0.00 |
| H      |      |    |     |    |        |        |        |      |      |
| HETATM | 1234 | O2 | PRP | 11 | 10.374 | 20.070 | 51.172 | 1.00 | 0.00 |
| O      |      |    |     |    |        |        |        |      |      |
| HETATM | 1235 | H5 | PRP | 11 | 9.717  | 20.746 | 51.353 | 1.00 | 0.00 |
| H      |      |    |     |    |        |        |        |      |      |
| HETATM | 1236 | C3 | PRP | 11 | 10.165 | 17.662 | 50.943 | 1.00 | 0.00 |
| C      |      |    |     |    |        |        |        |      |      |
| HETATM | 1237 | H6 | PRP | 11 | 9.695  | 16.772 | 51.362 | 1.00 | 0.00 |
| H      |      |    |     |    |        |        |        |      |      |
| HETATM | 1238 | H7 | PRP | 11 | 9.863  | 17.663 | 49.895 | 1.00 | 0.00 |
| H      |      |    |     |    |        |        |        |      |      |
| HETATM | 1239 | H8 | PRP | 11 | 11.239 | 17.491 | 51.017 | 1.00 | 0.00 |
| H      |      |    |     |    |        |        |        |      |      |
| HETATM | 1240 | O1 | PRP | 12 | 37.197 | 20.970 | 62.429 | 1.00 | 0.00 |
| O      |      |    |     |    |        |        |        |      |      |
| HETATM | 1241 | H1 | PRP | 12 | 36.786 | 20.110 | 62.543 | 1.00 | 0.00 |
| H      |      |    |     |    |        |        |        |      |      |
| HETATM | 1242 | C1 | PRP | 12 | 36.979 | 21.806 | 63.580 | 1.00 | 0.00 |
| C      |      |    |     |    |        |        |        |      |      |
| HETATM | 1243 | H2 | PRP | 12 | 37.052 | 22.782 | 63.099 | 1.00 | 0.00 |
| H      |      |    |     |    |        |        |        |      |      |
| HETATM | 1244 | H3 | PRP | 12 | 35.929 | 21.770 | 63.873 | 1.00 | 0.00 |
| H      |      |    |     |    |        |        |        |      |      |
| HETATM | 1245 | C2 | PRP | 12 | 37.829 | 21.628 | 64.834 | 1.00 | 0.00 |
| C      |      |    |     |    |        |        |        |      |      |
| HETATM | 1246 | H4 | PRP | 12 | 38.874 | 21.633 | 64.524 | 1.00 | 0.00 |
| H      |      |    |     |    |        |        |        |      |      |
| HETATM | 1247 | O2 | PRP | 12 | 37.457 | 20.471 | 65.557 | 1.00 | 0.00 |
| O      |      |    |     |    |        |        |        |      |      |
| HETATM | 1248 | H5 | PRP | 12 | 38.197 | 20.193 | 66.102 | 1.00 | 0.00 |
| H      |      |    |     |    |        |        |        |      |      |
| HETATM | 1249 | C3 | PRP | 12 | 37.550 | 22.766 | 65.807 | 1.00 | 0.00 |
| C      |      |    |     |    |        |        |        |      |      |
| HETATM | 1250 | H6 | PRP | 12 | 36.607 | 22.644 | 66.339 | 1.00 | 0.00 |
| H      |      |    |     |    |        |        |        |      |      |
| HETATM | 1251 | H7 | PRP | 12 | 38.324 | 22.671 | 66.568 | 1.00 | 0.00 |
| H      |      |    |     |    |        |        |        |      |      |
| HETATM | 1252 | H8 | PRP | 12 | 37.477 | 23.758 | 65.363 | 1.00 | 0.00 |
| H      |      |    |     |    |        |        |        |      |      |
| HETATM | 1253 | O1 | PRP | 13 | 29.635 | 9.920  | 50.555 | 1.00 | 0.00 |
| O      |      |    |     |    |        |        |        |      |      |
| HETATM | 1254 | H1 | PRP | 13 | 29.465 | 9.136  | 51.082 | 1.00 | 0.00 |
| H      |      |    |     |    |        |        |        |      |      |
| HETATM | 1255 | C1 | PRP | 13 | 29.326 | 9.639  | 49.230 | 1.00 | 0.00 |
| C      |      |    |     |    |        |        |        |      |      |
| HETATM | 1256 | H2 | PRP | 13 | 29.657 | 10.442 | 48.572 | 1.00 | 0.00 |
| H      |      |    |     |    |        |        |        |      |      |
| HETATM | 1257 | H3 | PRP | 13 | 29.699 | 8.638  | 49.010 | 1.00 | 0.00 |
| H      |      |    |     |    |        |        |        |      |      |
| HETATM | 1258 | C2 | PRP | 13 | 27.811 | 9.694  | 49.188 | 1.00 | 0.00 |
| C      |      |    |     |    |        |        |        |      |      |
| HETATM | 1259 | H4 | PRP | 13 | 27.430 | 10.568 | 49.716 | 1.00 | 0.00 |
| H      |      |    |     |    |        |        |        |      |      |



|        |      |    |     |    |        |        |        |      |      |
|--------|------|----|-----|----|--------|--------|--------|------|------|
| HETATM | 1260 | O2 | PRP | 13 | 27.233 | 8.613  | 49.803 | 1.00 | 0.00 |
| O      |      |    |     |    |        |        |        |      |      |
| HETATM | 1261 | H5 | PRP | 13 | 26.571 | 9.066  | 50.331 | 1.00 | 0.00 |
| H      |      |    |     |    |        |        |        |      |      |
| HETATM | 1262 | C3 | PRP | 13 | 27.258 | 9.764  | 47.740 | 1.00 | 0.00 |
| C      |      |    |     |    |        |        |        |      |      |
| HETATM | 1263 | H6 | PRP | 13 | 27.700 | 9.007  | 47.092 | 1.00 | 0.00 |
| H      |      |    |     |    |        |        |        |      |      |
| HETATM | 1264 | H7 | PRP | 13 | 26.199 | 9.507  | 47.764 | 1.00 | 0.00 |
| H      |      |    |     |    |        |        |        |      |      |
| HETATM | 1265 | H8 | PRP | 13 | 27.361 | 10.760 | 47.309 | 1.00 | 0.00 |
| H      |      |    |     |    |        |        |        |      |      |
| HETATM | 1266 | O1 | PRP | 14 | 17.634 | 35.530 | 47.309 | 1.00 | 0.00 |
| O      |      |    |     |    |        |        |        |      |      |
| HETATM | 1267 | H1 | PRP | 14 | 17.198 | 36.293 | 46.922 | 1.00 | 0.00 |
| H      |      |    |     |    |        |        |        |      |      |
| HETATM | 1268 | C1 | PRP | 14 | 18.058 | 34.659 | 46.218 | 1.00 | 0.00 |
| C      |      |    |     |    |        |        |        |      |      |
| HETATM | 1269 | H2 | PRP | 14 | 18.782 | 33.936 | 46.592 | 1.00 | 0.00 |
| H      |      |    |     |    |        |        |        |      |      |
| HETATM | 1270 | H3 | PRP | 14 | 17.198 | 34.148 | 45.786 | 1.00 | 0.00 |
| H      |      |    |     |    |        |        |        |      |      |
| HETATM | 1271 | C2 | PRP | 14 | 18.792 | 35.432 | 45.119 | 1.00 | 0.00 |
| C      |      |    |     |    |        |        |        |      |      |
| HETATM | 1272 | H4 | PRP | 14 | 19.513 | 36.062 | 45.641 | 1.00 | 0.00 |
| H      |      |    |     |    |        |        |        |      |      |
| HETATM | 1273 | O2 | PRP | 14 | 17.881 | 36.258 | 44.411 | 1.00 | 0.00 |
| O      |      |    |     |    |        |        |        |      |      |
| HETATM | 1274 | H5 | PRP | 14 | 17.260 | 35.723 | 43.910 | 1.00 | 0.00 |
| H      |      |    |     |    |        |        |        |      |      |
| HETATM | 1275 | C3 | PRP | 14 | 19.519 | 34.493 | 44.082 | 1.00 | 0.00 |
| C      |      |    |     |    |        |        |        |      |      |
| HETATM | 1276 | H6 | PRP | 14 | 18.729 | 33.865 | 43.669 | 1.00 | 0.00 |
| H      |      |    |     |    |        |        |        |      |      |
| HETATM | 1277 | H7 | PRP | 14 | 19.946 | 35.097 | 43.281 | 1.00 | 0.00 |
| H      |      |    |     |    |        |        |        |      |      |
| HETATM | 1278 | H8 | PRP | 14 | 20.342 | 33.916 | 44.503 | 1.00 | 0.00 |
| H      |      |    |     |    |        |        |        |      |      |
| HETATM | 1279 | O1 | PRP | 15 | 17.919 | 32.507 | 48.809 | 1.00 | 0.00 |
| O      |      |    |     |    |        |        |        |      |      |
| HETATM | 1280 | H1 | PRP | 15 | 17.855 | 33.432 | 48.559 | 1.00 | 0.00 |
| H      |      |    |     |    |        |        |        |      |      |
| HETATM | 1281 | C1 | PRP | 15 | 17.497 | 32.426 | 50.211 | 1.00 | 0.00 |
| C      |      |    |     |    |        |        |        |      |      |
| HETATM | 1282 | H2 | PRP | 15 | 17.552 | 31.372 | 50.482 | 1.00 | 0.00 |
| H      |      |    |     |    |        |        |        |      |      |
| HETATM | 1283 | H3 | PRP | 15 | 18.162 | 32.989 | 50.866 | 1.00 | 0.00 |
| H      |      |    |     |    |        |        |        |      |      |
| HETATM | 1284 | C2 | PRP | 15 | 16.067 | 32.912 | 50.406 | 1.00 | 0.00 |
| C      |      |    |     |    |        |        |        |      |      |
| HETATM | 1285 | H4 | PRP | 15 | 15.785 | 32.913 | 51.459 | 1.00 | 0.00 |
| H      |      |    |     |    |        |        |        |      |      |
| HETATM | 1286 | O2 | PRP | 15 | 15.344 | 31.852 | 49.766 | 1.00 | 0.00 |
| O      |      |    |     |    |        |        |        |      |      |
| HETATM | 1287 | H5 | PRP | 15 | 14.398 | 32.011 | 49.807 | 1.00 | 0.00 |
| H      |      |    |     |    |        |        |        |      |      |

|        |      |    |     |    |        |        |        |      |      |
|--------|------|----|-----|----|--------|--------|--------|------|------|
| HETATM | 1288 | C3 | PRP | 15 | 15.732 | 34.177 | 49.673 | 1.00 | 0.00 |
| C      |      |    |     |    |        |        |        |      |      |
| HETATM | 1289 | H6 | PRP | 15 | 16.233 | 34.981 | 50.213 | 1.00 | 0.00 |
| H      |      |    |     |    |        |        |        |      |      |
| HETATM | 1290 | H7 | PRP | 15 | 15.931 | 34.088 | 48.606 | 1.00 | 0.00 |
| H      |      |    |     |    |        |        |        |      |      |
| HETATM | 1291 | H8 | PRP | 15 | 14.696 | 34.513 | 49.731 | 1.00 | 0.00 |
| H      |      |    |     |    |        |        |        |      |      |
| HETATM | 1292 | O1 | PRP | 16 | 15.375 | 43.579 | 43.902 | 1.00 | 0.00 |
| O      |      |    |     |    |        |        |        |      |      |
| HETATM | 1293 | H1 | PRP | 16 | 15.974 | 43.155 | 43.284 | 1.00 | 0.00 |
| H      |      |    |     |    |        |        |        |      |      |
| HETATM | 1294 | C1 | PRP | 16 | 14.223 | 43.136 | 43.343 | 1.00 | 0.00 |
| C      |      |    |     |    |        |        |        |      |      |
| HETATM | 1295 | H2 | PRP | 16 | 14.109 | 43.824 | 42.505 | 1.00 | 0.00 |
| H      |      |    |     |    |        |        |        |      |      |
| HETATM | 1296 | H3 | PRP | 16 | 14.329 | 42.129 | 42.939 | 1.00 | 0.00 |
| H      |      |    |     |    |        |        |        |      |      |
| HETATM | 1297 | C2 | PRP | 16 | 13.072 | 43.270 | 44.281 | 1.00 | 0.00 |
| C      |      |    |     |    |        |        |        |      |      |
| HETATM | 1298 | H4 | PRP | 16 | 13.101 | 44.301 | 44.635 | 1.00 | 0.00 |
| H      |      |    |     |    |        |        |        |      |      |
| HETATM | 1299 | O2 | PRP | 16 | 13.295 | 42.450 | 45.334 | 1.00 | 0.00 |
| O      |      |    |     |    |        |        |        |      |      |
| HETATM | 1300 | H5 | PRP | 16 | 14.228 | 42.237 | 45.415 | 1.00 | 0.00 |
| H      |      |    |     |    |        |        |        |      |      |
| HETATM | 1301 | C3 | PRP | 16 | 11.785 | 42.905 | 43.537 | 1.00 | 0.00 |
| C      |      |    |     |    |        |        |        |      |      |
| HETATM | 1302 | H6 | PRP | 16 | 11.786 | 43.330 | 42.533 | 1.00 | 0.00 |
| H      |      |    |     |    |        |        |        |      |      |
| HETATM | 1303 | H7 | PRP | 16 | 11.777 | 41.824 | 43.401 | 1.00 | 0.00 |
| H      |      |    |     |    |        |        |        |      |      |
| HETATM | 1304 | H8 | PRP | 16 | 10.954 | 43.164 | 44.193 | 1.00 | 0.00 |
| H      |      |    |     |    |        |        |        |      |      |
| HETATM | 1305 | O1 | PRP | 17 | 3.070  | 34.776 | 48.637 | 1.00 | 0.00 |
| O      |      |    |     |    |        |        |        |      |      |
| HETATM | 1306 | H1 | PRP | 17 | 2.485  | 35.334 | 49.155 | 1.00 | 0.00 |
| H      |      |    |     |    |        |        |        |      |      |
| HETATM | 1307 | C1 | PRP | 17 | 3.110  | 33.556 | 49.402 | 1.00 | 0.00 |
| C      |      |    |     |    |        |        |        |      |      |
| HETATM | 1308 | H2 | PRP | 17 | 2.293  | 32.890 | 49.125 | 1.00 | 0.00 |
| H      |      |    |     |    |        |        |        |      |      |
| HETATM | 1309 | H3 | PRP | 17 | 4.094  | 33.132 | 49.201 | 1.00 | 0.00 |
| H      |      |    |     |    |        |        |        |      |      |
| HETATM | 1310 | C2 | PRP | 17 | 2.904  | 33.719 | 50.874 | 1.00 | 0.00 |
| C      |      |    |     |    |        |        |        |      |      |
| HETATM | 1311 | H4 | PRP | 17 | 3.163  | 32.828 | 51.447 | 1.00 | 0.00 |
| H      |      |    |     |    |        |        |        |      |      |
| HETATM | 1312 | O2 | PRP | 17 | 1.500  | 33.958 | 51.137 | 1.00 | 0.00 |
| O      |      |    |     |    |        |        |        |      |      |
| HETATM | 1313 | H5 | PRP | 17 | 1.213  | 33.598 | 51.980 | 1.00 | 0.00 |
| H      |      |    |     |    |        |        |        |      |      |
| HETATM | 1314 | C3 | PRP | 17 | 3.582  | 34.903 | 51.501 | 1.00 | 0.00 |
| C      |      |    |     |    |        |        |        |      |      |
| HETATM | 1315 | H6 | PRP | 17 | 3.278  | 35.050 | 52.538 | 1.00 | 0.00 |
| H      |      |    |     |    |        |        |        |      |      |

|        |      |    |     |    |        |        |        |      |      |
|--------|------|----|-----|----|--------|--------|--------|------|------|
| HETATM | 1316 | H7 | PRP | 17 | 4.658  | 34.800 | 51.362 | 1.00 | 0.00 |
| H      |      |    |     |    |        |        |        |      |      |
| HETATM | 1317 | H8 | PRP | 17 | 3.253  | 35.765 | 50.920 | 1.00 | 0.00 |
| H      |      |    |     |    |        |        |        |      |      |
| HETATM | 1318 | O1 | PRP | 18 | 11.920 | 28.286 | 50.112 | 1.00 | 0.00 |
| O      |      |    |     |    |        |        |        |      |      |
| HETATM | 1319 | H1 | PRP | 18 | 11.185 | 27.914 | 50.606 | 1.00 | 0.00 |
| H      |      |    |     |    |        |        |        |      |      |
| HETATM | 1320 | C1 | PRP | 18 | 13.275 | 28.015 | 50.531 | 1.00 | 0.00 |
| C      |      |    |     |    |        |        |        |      |      |
| HETATM | 1321 | H2 | PRP | 18 | 13.944 | 28.345 | 49.736 | 1.00 | 0.00 |
| H      |      |    |     |    |        |        |        |      |      |
| HETATM | 1322 | H3 | PRP | 18 | 13.412 | 28.703 | 51.365 | 1.00 | 0.00 |
| H      |      |    |     |    |        |        |        |      |      |
| HETATM | 1323 | C2 | PRP | 18 | 13.559 | 26.536 | 50.818 | 1.00 | 0.00 |
| C      |      |    |     |    |        |        |        |      |      |
| HETATM | 1324 | H4 | PRP | 18 | 14.575 | 26.434 | 51.200 | 1.00 | 0.00 |
| H      |      |    |     |    |        |        |        |      |      |
| HETATM | 1325 | O2 | PRP | 18 | 13.404 | 25.787 | 49.656 | 1.00 | 0.00 |
| O      |      |    |     |    |        |        |        |      |      |
| HETATM | 1326 | H5 | PRP | 18 | 12.829 | 26.225 | 49.024 | 1.00 | 0.00 |
| H      |      |    |     |    |        |        |        |      |      |
| HETATM | 1327 | C3 | PRP | 18 | 12.586 | 25.820 | 51.801 | 1.00 | 0.00 |
| C      |      |    |     |    |        |        |        |      |      |
| HETATM | 1328 | H6 | PRP | 18 | 13.152 | 24.999 | 52.241 | 1.00 | 0.00 |
| H      |      |    |     |    |        |        |        |      |      |
| HETATM | 1329 | H7 | PRP | 18 | 12.173 | 26.474 | 52.569 | 1.00 | 0.00 |
| H      |      |    |     |    |        |        |        |      |      |
| HETATM | 1330 | H8 | PRP | 18 | 11.644 | 25.516 | 51.345 | 1.00 | 0.00 |
| H      |      |    |     |    |        |        |        |      |      |
| HETATM | 1331 | O1 | PRP | 19 | 16.088 | 47.876 | 51.721 | 1.00 | 0.00 |
| O      |      |    |     |    |        |        |        |      |      |
| HETATM | 1332 | H1 | PRP | 19 | 15.888 | 47.354 | 50.941 | 1.00 | 0.00 |
| H      |      |    |     |    |        |        |        |      |      |
| HETATM | 1333 | C1 | PRP | 19 | 17.211 | 47.324 | 52.361 | 1.00 | 0.00 |
| C      |      |    |     |    |        |        |        |      |      |
| HETATM | 1334 | H2 | PRP | 19 | 17.463 | 47.931 | 53.230 | 1.00 | 0.00 |
| H      |      |    |     |    |        |        |        |      |      |
| HETATM | 1335 | H3 | PRP | 19 | 16.855 | 46.349 | 52.694 | 1.00 | 0.00 |
| H      |      |    |     |    |        |        |        |      |      |
| HETATM | 1336 | C2 | PRP | 19 | 18.430 | 47.014 | 51.440 | 1.00 | 0.00 |
| C      |      |    |     |    |        |        |        |      |      |
| HETATM | 1337 | H4 | PRP | 19 | 18.748 | 47.948 | 50.976 | 1.00 | 0.00 |
| H      |      |    |     |    |        |        |        |      |      |
| HETATM | 1338 | O2 | PRP | 19 | 18.034 | 46.180 | 50.341 | 1.00 | 0.00 |
| O      |      |    |     |    |        |        |        |      |      |
| HETATM | 1339 | H5 | PRP | 19 | 18.698 | 46.282 | 49.655 | 1.00 | 0.00 |
| H      |      |    |     |    |        |        |        |      |      |
| HETATM | 1340 | C3 | PRP | 19 | 19.558 | 46.337 | 52.094 | 1.00 | 0.00 |
| C      |      |    |     |    |        |        |        |      |      |
| HETATM | 1341 | H6 | PRP | 19 | 19.960 | 47.023 | 52.839 | 1.00 | 0.00 |
| H      |      |    |     |    |        |        |        |      |      |
| HETATM | 1342 | H7 | PRP | 19 | 19.169 | 45.528 | 52.713 | 1.00 | 0.00 |
| H      |      |    |     |    |        |        |        |      |      |
| HETATM | 1343 | H8 | PRP | 19 | 20.414 | 46.035 | 51.492 | 1.00 | 0.00 |
| H      |      |    |     |    |        |        |        |      |      |

|        |      |    |     |    |        |        |        |      |      |
|--------|------|----|-----|----|--------|--------|--------|------|------|
| HETATM | 1344 | O1 | PRP | 20 | 17.987 | 35.761 | 51.948 | 1.00 | 0.00 |
| O      |      |    |     |    |        |        |        |      |      |
| HETATM | 1345 | H1 | PRP | 20 | 18.628 | 35.730 | 51.234 | 1.00 | 0.00 |
| H      |      |    |     |    |        |        |        |      |      |
| HETATM | 1346 | C1 | PRP | 20 | 18.119 | 37.089 | 52.486 | 1.00 | 0.00 |
| C      |      |    |     |    |        |        |        |      |      |
| HETATM | 1347 | H2 | PRP | 20 | 19.109 | 37.172 | 52.934 | 1.00 | 0.00 |
| H      |      |    |     |    |        |        |        |      |      |
| HETATM | 1348 | H3 | PRP | 20 | 17.989 | 37.828 | 51.695 | 1.00 | 0.00 |
| H      |      |    |     |    |        |        |        |      |      |
| HETATM | 1349 | C2 | PRP | 20 | 17.235 | 37.413 | 53.702 | 1.00 | 0.00 |
| C      |      |    |     |    |        |        |        |      |      |
| HETATM | 1350 | H4 | PRP | 20 | 17.528 | 36.817 | 54.567 | 1.00 | 0.00 |
| H      |      |    |     |    |        |        |        |      |      |
| HETATM | 1351 | O2 | PRP | 20 | 15.873 | 37.350 | 53.342 | 1.00 | 0.00 |
| O      |      |    |     |    |        |        |        |      |      |
| HETATM | 1352 | H5 | PRP | 20 | 15.692 | 36.604 | 52.767 | 1.00 | 0.00 |
| H      |      |    |     |    |        |        |        |      |      |
| HETATM | 1353 | C3 | PRP | 20 | 17.565 | 38.833 | 54.245 | 1.00 | 0.00 |
| C      |      |    |     |    |        |        |        |      |      |
| HETATM | 1354 | H6 | PRP | 20 | 18.602 | 38.881 | 54.578 | 1.00 | 0.00 |
| H      |      |    |     |    |        |        |        |      |      |
| HETATM | 1355 | H7 | PRP | 20 | 17.266 | 39.448 | 53.397 | 1.00 | 0.00 |
| H      |      |    |     |    |        |        |        |      |      |
| HETATM | 1356 | H8 | PRP | 20 | 16.995 | 38.895 | 55.172 | 1.00 | 0.00 |
| H      |      |    |     |    |        |        |        |      |      |
| HETATM | 1357 | O1 | PRP | 21 | 7.642  | 41.152 | 46.234 | 1.00 | 0.00 |
| O      |      |    |     |    |        |        |        |      |      |
| HETATM | 1358 | H1 | PRP | 21 | 8.188  | 40.689 | 45.595 | 1.00 | 0.00 |
| H      |      |    |     |    |        |        |        |      |      |
| HETATM | 1359 | C1 | PRP | 21 | 7.212  | 42.355 | 45.495 | 1.00 | 0.00 |
| C      |      |    |     |    |        |        |        |      |      |
| HETATM | 1360 | H2 | PRP | 21 | 7.012  | 43.238 | 46.102 | 1.00 | 0.00 |
| H      |      |    |     |    |        |        |        |      |      |
| HETATM | 1361 | H3 | PRP | 21 | 8.050  | 42.731 | 44.909 | 1.00 | 0.00 |
| H      |      |    |     |    |        |        |        |      |      |
| HETATM | 1362 | C2 | PRP | 21 | 5.938  | 42.092 | 44.724 | 1.00 | 0.00 |
| C      |      |    |     |    |        |        |        |      |      |
| HETATM | 1363 | H4 | PRP | 21 | 5.173  | 41.926 | 45.483 | 1.00 | 0.00 |
| H      |      |    |     |    |        |        |        |      |      |
| HETATM | 1364 | O2 | PRP | 21 | 5.952  | 40.976 | 43.915 | 1.00 | 0.00 |
| O      |      |    |     |    |        |        |        |      |      |
| HETATM | 1365 | H5 | PRP | 21 | 5.965  | 40.192 | 44.470 | 1.00 | 0.00 |
| H      |      |    |     |    |        |        |        |      |      |
| HETATM | 1366 | C3 | PRP | 21 | 5.515  | 43.317 | 43.923 | 1.00 | 0.00 |
| C      |      |    |     |    |        |        |        |      |      |
| HETATM | 1367 | H6 | PRP | 21 | 6.357  | 43.440 | 43.241 | 1.00 | 0.00 |
| H      |      |    |     |    |        |        |        |      |      |
| HETATM | 1368 | H7 | PRP | 21 | 4.553  | 43.111 | 43.454 | 1.00 | 0.00 |
| H      |      |    |     |    |        |        |        |      |      |
| HETATM | 1369 | H8 | PRP | 21 | 5.431  | 44.172 | 44.593 | 1.00 | 0.00 |
| H      |      |    |     |    |        |        |        |      |      |
| HETATM | 1370 | O1 | PRP | 22 | 21.527 | 23.144 | 51.186 | 1.00 | 0.00 |
| O      |      |    |     |    |        |        |        |      |      |
| HETATM | 1371 | H1 | PRP | 22 | 21.510 | 23.468 | 50.282 | 1.00 | 0.00 |
| H      |      |    |     |    |        |        |        |      |      |

|        |      |    |     |    |        |        |        |      |      |
|--------|------|----|-----|----|--------|--------|--------|------|------|
| HETATM | 1372 | C1 | PRP | 22 | 20.181 | 22.837 | 51.640 | 1.00 | 0.00 |
| C      |      |    |     |    |        |        |        |      |      |
| HETATM | 1373 | H2 | PRP | 22 | 20.163 | 21.845 | 52.090 | 1.00 | 0.00 |
| H      |      |    |     |    |        |        |        |      |      |
| HETATM | 1374 | H3 | PRP | 22 | 19.816 | 23.501 | 52.424 | 1.00 | 0.00 |
| H      |      |    |     |    |        |        |        |      |      |
| HETATM | 1375 | C2 | PRP | 22 | 19.202 | 23.054 | 50.500 | 1.00 | 0.00 |
| C      |      |    |     |    |        |        |        |      |      |
| HETATM | 1376 | H4 | PRP | 22 | 19.638 | 22.504 | 49.666 | 1.00 | 0.00 |
| H      |      |    |     |    |        |        |        |      |      |
| HETATM | 1377 | O2 | PRP | 22 | 19.072 | 24.462 | 50.091 | 1.00 | 0.00 |
| O      |      |    |     |    |        |        |        |      |      |
| HETATM | 1378 | H5 | PRP | 22 | 18.468 | 24.430 | 49.346 | 1.00 | 0.00 |
| H      |      |    |     |    |        |        |        |      |      |
| HETATM | 1379 | C3 | PRP | 22 | 17.821 | 22.485 | 50.786 | 1.00 | 0.00 |
| C      |      |    |     |    |        |        |        |      |      |
| HETATM | 1380 | H6 | PRP | 22 | 17.295 | 22.989 | 51.597 | 1.00 | 0.00 |
| H      |      |    |     |    |        |        |        |      |      |
| HETATM | 1381 | H7 | PRP | 22 | 17.219 | 22.582 | 49.883 | 1.00 | 0.00 |
| H      |      |    |     |    |        |        |        |      |      |
| HETATM | 1382 | H8 | PRP | 22 | 18.002 | 21.438 | 51.028 | 1.00 | 0.00 |
| H      |      |    |     |    |        |        |        |      |      |
| HETATM | 1383 | O1 | PRP | 23 | 26.080 | 23.547 | 47.389 | 1.00 | 0.00 |
| O      |      |    |     |    |        |        |        |      |      |
| HETATM | 1384 | H1 | PRP | 23 | 25.299 | 23.016 | 47.221 | 1.00 | 0.00 |
| H      |      |    |     |    |        |        |        |      |      |
| HETATM | 1385 | C1 | PRP | 23 | 27.025 | 23.318 | 46.357 | 1.00 | 0.00 |
| C      |      |    |     |    |        |        |        |      |      |
| HETATM | 1386 | H2 | PRP | 23 | 26.541 | 23.327 | 45.380 | 1.00 | 0.00 |
| H      |      |    |     |    |        |        |        |      |      |
| HETATM | 1387 | H3 | PRP | 23 | 27.925 | 23.902 | 46.551 | 1.00 | 0.00 |
| H      |      |    |     |    |        |        |        |      |      |
| HETATM | 1388 | C2 | PRP | 23 | 27.420 | 21.838 | 46.415 | 1.00 | 0.00 |
| C      |      |    |     |    |        |        |        |      |      |
| HETATM | 1389 | H4 | PRP | 23 | 26.647 | 21.126 | 46.125 | 1.00 | 0.00 |
| H      |      |    |     |    |        |        |        |      |      |
| HETATM | 1390 | O2 | PRP | 23 | 27.808 | 21.620 | 47.687 | 1.00 | 0.00 |
| O      |      |    |     |    |        |        |        |      |      |
| HETATM | 1391 | H5 | PRP | 23 | 27.383 | 22.329 | 48.174 | 1.00 | 0.00 |
| H      |      |    |     |    |        |        |        |      |      |
| HETATM | 1392 | C3 | PRP | 23 | 28.581 | 21.611 | 45.426 | 1.00 | 0.00 |
| C      |      |    |     |    |        |        |        |      |      |
| HETATM | 1393 | H6 | PRP | 23 | 29.310 | 22.418 | 45.358 | 1.00 | 0.00 |
| H      |      |    |     |    |        |        |        |      |      |
| HETATM | 1394 | H7 | PRP | 23 | 29.131 | 20.713 | 45.706 | 1.00 | 0.00 |
| H      |      |    |     |    |        |        |        |      |      |
| HETATM | 1395 | H8 | PRP | 23 | 28.185 | 21.390 | 44.435 | 1.00 | 0.00 |
| H      |      |    |     |    |        |        |        |      |      |
| HETATM | 1396 | O1 | PRP | 24 | 34.593 | 18.010 | 59.677 | 1.00 | 0.00 |
| O      |      |    |     |    |        |        |        |      |      |
| HETATM | 1397 | H1 | PRP | 24 | 34.957 | 18.899 | 59.685 | 1.00 | 0.00 |
| H      |      |    |     |    |        |        |        |      |      |
| HETATM | 1398 | C1 | PRP | 24 | 35.362 | 17.226 | 58.862 | 1.00 | 0.00 |
| C      |      |    |     |    |        |        |        |      |      |
| HETATM | 1399 | H2 | PRP | 24 | 35.389 | 17.628 | 57.849 | 1.00 | 0.00 |
| H      |      |    |     |    |        |        |        |      |      |

|        |      |    |     |    |        |        |        |      |      |
|--------|------|----|-----|----|--------|--------|--------|------|------|
| HETATM | 1400 | H3 | PRP | 24 | 36.326 | 17.315 | 59.362 | 1.00 | 0.00 |
| H      |      |    |     |    |        |        |        |      |      |
| HETATM | 1401 | C2 | PRP | 24 | 34.929 | 15.739 | 58.946 | 1.00 | 0.00 |
| C      |      |    |     |    |        |        |        |      |      |
| HETATM | 1402 | H4 | PRP | 24 | 35.717 | 15.241 | 58.380 | 1.00 | 0.00 |
| H      |      |    |     |    |        |        |        |      |      |
| HETATM | 1403 | O2 | PRP | 24 | 33.738 | 15.490 | 58.273 | 1.00 | 0.00 |
| O      |      |    |     |    |        |        |        |      |      |
| HETATM | 1404 | H5 | PRP | 24 | 33.020 | 15.987 | 58.673 | 1.00 | 0.00 |
| H      |      |    |     |    |        |        |        |      |      |
| HETATM | 1405 | C3 | PRP | 24 | 34.819 | 15.215 | 60.392 | 1.00 | 0.00 |
| C      |      |    |     |    |        |        |        |      |      |
| HETATM | 1406 | H6 | PRP | 24 | 35.235 | 14.208 | 60.347 | 1.00 | 0.00 |
| H      |      |    |     |    |        |        |        |      |      |
| HETATM | 1407 | H7 | PRP | 24 | 35.601 | 15.756 | 60.927 | 1.00 | 0.00 |
| H      |      |    |     |    |        |        |        |      |      |
| HETATM | 1408 | H8 | PRP | 24 | 33.849 | 15.291 | 60.884 | 1.00 | 0.00 |
| H      |      |    |     |    |        |        |        |      |      |
| HETATM | 1409 | O1 | PRP | 25 | 32.748 | 32.264 | 36.311 | 1.00 | 0.00 |
| O      |      |    |     |    |        |        |        |      |      |
| HETATM | 1410 | H1 | PRP | 25 | 32.755 | 31.601 | 35.617 | 1.00 | 0.00 |
| H      |      |    |     |    |        |        |        |      |      |
| HETATM | 1411 | C1 | PRP | 25 | 32.654 | 31.646 | 37.526 | 1.00 | 0.00 |
| C      |      |    |     |    |        |        |        |      |      |
| HETATM | 1412 | H2 | PRP | 25 | 31.688 | 31.753 | 38.020 | 1.00 | 0.00 |
| H      |      |    |     |    |        |        |        |      |      |
| HETATM | 1413 | H3 | PRP | 25 | 32.677 | 30.565 | 37.388 | 1.00 | 0.00 |
| H      |      |    |     |    |        |        |        |      |      |
| HETATM | 1414 | C2 | PRP | 25 | 33.822 | 32.007 | 38.462 | 1.00 | 0.00 |
| C      |      |    |     |    |        |        |        |      |      |
| HETATM | 1415 | H4 | PRP | 25 | 34.075 | 33.064 | 38.376 | 1.00 | 0.00 |
| H      |      |    |     |    |        |        |        |      |      |
| HETATM | 1416 | O2 | PRP | 25 | 34.974 | 31.222 | 38.034 | 1.00 | 0.00 |
| O      |      |    |     |    |        |        |        |      |      |
| HETATM | 1417 | H5 | PRP | 25 | 35.512 | 31.697 | 37.397 | 1.00 | 0.00 |
| H      |      |    |     |    |        |        |        |      |      |
| HETATM | 1418 | C3 | PRP | 25 | 33.455 | 31.800 | 39.890 | 1.00 | 0.00 |
| C      |      |    |     |    |        |        |        |      |      |
| HETATM | 1419 | H6 | PRP | 25 | 32.486 | 32.266 | 40.070 | 1.00 | 0.00 |
| H      |      |    |     |    |        |        |        |      |      |
| HETATM | 1420 | H7 | PRP | 25 | 33.471 | 30.726 | 40.075 | 1.00 | 0.00 |
| H      |      |    |     |    |        |        |        |      |      |
| HETATM | 1421 | H8 | PRP | 25 | 34.184 | 32.322 | 40.511 | 1.00 | 0.00 |
| H      |      |    |     |    |        |        |        |      |      |
| HETATM | 1422 | O1 | PRP | 26 | 15.436 | 37.776 | 58.857 | 1.00 | 0.00 |
| O      |      |    |     |    |        |        |        |      |      |
| HETATM | 1423 | H1 | PRP | 26 | 15.947 | 38.156 | 59.575 | 1.00 | 0.00 |
| H      |      |    |     |    |        |        |        |      |      |
| HETATM | 1424 | C1 | PRP | 26 | 15.435 | 36.417 | 58.943 | 1.00 | 0.00 |
| C      |      |    |     |    |        |        |        |      |      |
| HETATM | 1425 | H2 | PRP | 26 | 16.459 | 36.059 | 59.051 | 1.00 | 0.00 |
| H      |      |    |     |    |        |        |        |      |      |
| HETATM | 1426 | H3 | PRP | 26 | 14.855 | 36.038 | 59.785 | 1.00 | 0.00 |
| H      |      |    |     |    |        |        |        |      |      |
| HETATM | 1427 | C2 | PRP | 26 | 14.980 | 35.813 | 57.618 | 1.00 | 0.00 |
| C      |      |    |     |    |        |        |        |      |      |

|        |      |    |     |    |        |        |        |      |      |
|--------|------|----|-----|----|--------|--------|--------|------|------|
| HETATM | 1428 | H4 | PRP | 26 | 15.603 | 36.338 | 56.894 | 1.00 | 0.00 |
| H      |      |    |     |    |        |        |        |      |      |
| HETATM | 1429 | O2 | PRP | 26 | 13.601 | 36.062 | 57.425 | 1.00 | 0.00 |
| O      |      |    |     |    |        |        |        |      |      |
| HETATM | 1430 | H5 | PRP | 26 | 13.559 | 37.020 | 57.371 | 1.00 | 0.00 |
| H      |      |    |     |    |        |        |        |      |      |
| HETATM | 1431 | C3 | PRP | 26 | 15.137 | 34.299 | 57.627 | 1.00 | 0.00 |
| C      |      |    |     |    |        |        |        |      |      |
| HETATM | 1432 | H6 | PRP | 26 | 15.567 | 33.923 | 56.699 | 1.00 | 0.00 |
| H      |      |    |     |    |        |        |        |      |      |
| HETATM | 1433 | H7 | PRP | 26 | 15.882 | 33.980 | 58.357 | 1.00 | 0.00 |
| H      |      |    |     |    |        |        |        |      |      |
| HETATM | 1434 | H8 | PRP | 26 | 14.233 | 33.734 | 57.857 | 1.00 | 0.00 |
| H      |      |    |     |    |        |        |        |      |      |
| HETATM | 1435 | O1 | PRP | 27 | 38.364 | 35.736 | 42.873 | 1.00 | 0.00 |
| O      |      |    |     |    |        |        |        |      |      |
| HETATM | 1436 | H1 | PRP | 27 | 38.848 | 34.954 | 43.147 | 1.00 | 0.00 |
| H      |      |    |     |    |        |        |        |      |      |
| HETATM | 1437 | C1 | PRP | 27 | 37.255 | 35.842 | 43.711 | 1.00 | 0.00 |
| C      |      |    |     |    |        |        |        |      |      |
| HETATM | 1438 | H2 | PRP | 27 | 36.909 | 34.847 | 43.989 | 1.00 | 0.00 |
| H      |      |    |     |    |        |        |        |      |      |
| HETATM | 1439 | H3 | PRP | 27 | 37.570 | 36.496 | 44.524 | 1.00 | 0.00 |
| H      |      |    |     |    |        |        |        |      |      |
| HETATM | 1440 | C2 | PRP | 27 | 36.130 | 36.704 | 42.937 | 1.00 | 0.00 |
| C      |      |    |     |    |        |        |        |      |      |
| HETATM | 1441 | H4 | PRP | 27 | 35.791 | 35.972 | 42.204 | 1.00 | 0.00 |
| H      |      |    |     |    |        |        |        |      |      |
| HETATM | 1442 | O2 | PRP | 27 | 36.831 | 37.853 | 42.523 | 1.00 | 0.00 |
| O      |      |    |     |    |        |        |        |      |      |
| HETATM | 1443 | H5 | PRP | 27 | 37.544 | 37.398 | 42.068 | 1.00 | 0.00 |
| H      |      |    |     |    |        |        |        |      |      |
| HETATM | 1444 | C3 | PRP | 27 | 34.889 | 37.102 | 43.828 | 1.00 | 0.00 |
| C      |      |    |     |    |        |        |        |      |      |
| HETATM | 1445 | H6 | PRP | 27 | 35.148 | 37.564 | 44.781 | 1.00 | 0.00 |
| H      |      |    |     |    |        |        |        |      |      |
| HETATM | 1446 | H7 | PRP | 27 | 34.297 | 37.820 | 43.261 | 1.00 | 0.00 |
| H      |      |    |     |    |        |        |        |      |      |
| HETATM | 1447 | H8 | PRP | 27 | 34.273 | 36.212 | 43.959 | 1.00 | 0.00 |
| H      |      |    |     |    |        |        |        |      |      |
| HETATM | 1448 | O1 | PRP | 28 | 25.906 | 39.191 | 43.038 | 1.00 | 0.00 |
| O      |      |    |     |    |        |        |        |      |      |
| HETATM | 1449 | H1 | PRP | 28 | 25.022 | 39.501 | 42.831 | 1.00 | 0.00 |
| H      |      |    |     |    |        |        |        |      |      |
| HETATM | 1450 | C1 | PRP | 28 | 26.748 | 39.987 | 42.293 | 1.00 | 0.00 |
| C      |      |    |     |    |        |        |        |      |      |
| HETATM | 1451 | H2 | PRP | 28 | 27.229 | 39.377 | 41.528 | 1.00 | 0.00 |
| H      |      |    |     |    |        |        |        |      |      |
| HETATM | 1452 | H3 | PRP | 28 | 26.268 | 40.713 | 41.637 | 1.00 | 0.00 |
| H      |      |    |     |    |        |        |        |      |      |
| HETATM | 1453 | C2 | PRP | 28 | 27.862 | 40.655 | 43.134 | 1.00 | 0.00 |
| C      |      |    |     |    |        |        |        |      |      |
| HETATM | 1454 | H4 | PRP | 28 | 28.261 | 39.840 | 43.737 | 1.00 | 0.00 |
| H      |      |    |     |    |        |        |        |      |      |
| HETATM | 1455 | O2 | PRP | 28 | 27.217 | 41.498 | 44.089 | 1.00 | 0.00 |
| O      |      |    |     |    |        |        |        |      |      |

|        |      |    |     |    |        |        |        |      |      |
|--------|------|----|-----|----|--------|--------|--------|------|------|
| HETATM | 1456 | H5 | PRP | 28 | 26.798 | 41.066 | 44.837 | 1.00 | 0.00 |
| H      |      |    |     |    |        |        |        |      |      |
| HETATM | 1457 | C3 | PRP | 28 | 28.917 | 41.456 | 42.321 | 1.00 | 0.00 |
| C      |      |    |     |    |        |        |        |      |      |
| HETATM | 1458 | H6 | PRP | 28 | 29.458 | 42.180 | 42.930 | 1.00 | 0.00 |
| H      |      |    |     |    |        |        |        |      |      |
| HETATM | 1459 | H7 | PRP | 28 | 29.717 | 40.931 | 41.798 | 1.00 | 0.00 |
| H      |      |    |     |    |        |        |        |      |      |
| HETATM | 1460 | H8 | PRP | 28 | 28.444 | 42.007 | 41.508 | 1.00 | 0.00 |
| H      |      |    |     |    |        |        |        |      |      |
| HETATM | 1461 | O1 | PRP | 29 | 20.597 | 11.833 | 51.354 | 1.00 | 0.00 |
| O      |      |    |     |    |        |        |        |      |      |
| HETATM | 1462 | H1 | PRP | 29 | 19.886 | 11.189 | 51.302 | 1.00 | 0.00 |
| H      |      |    |     |    |        |        |        |      |      |
| HETATM | 1463 | C1 | PRP | 29 | 20.118 | 13.064 | 51.045 | 1.00 | 0.00 |
| C      |      |    |     |    |        |        |        |      |      |
| HETATM | 1464 | H2 | PRP | 29 | 19.597 | 13.409 | 51.939 | 1.00 | 0.00 |
| H      |      |    |     |    |        |        |        |      |      |
| HETATM | 1465 | H3 | PRP | 29 | 20.900 | 13.813 | 50.922 | 1.00 | 0.00 |
| H      |      |    |     |    |        |        |        |      |      |
| HETATM | 1466 | C2 | PRP | 29 | 19.460 | 13.093 | 49.630 | 1.00 | 0.00 |
| C      |      |    |     |    |        |        |        |      |      |
| HETATM | 1467 | H4 | PRP | 29 | 18.556 | 12.485 | 49.667 | 1.00 | 0.00 |
| H      |      |    |     |    |        |        |        |      |      |
| HETATM | 1468 | O2 | PRP | 29 | 20.352 | 12.622 | 48.577 | 1.00 | 0.00 |
| O      |      |    |     |    |        |        |        |      |      |
| HETATM | 1469 | H5 | PRP | 29 | 21.245 | 12.975 | 48.586 | 1.00 | 0.00 |
| H      |      |    |     |    |        |        |        |      |      |
| HETATM | 1470 | C3 | PRP | 29 | 19.037 | 14.462 | 49.267 | 1.00 | 0.00 |
| C      |      |    |     |    |        |        |        |      |      |
| HETATM | 1471 | H6 | PRP | 29 | 18.412 | 14.459 | 48.374 | 1.00 | 0.00 |
| H      |      |    |     |    |        |        |        |      |      |
| HETATM | 1472 | H7 | PRP | 29 | 18.437 | 14.837 | 50.096 | 1.00 | 0.00 |
| H      |      |    |     |    |        |        |        |      |      |
| HETATM | 1473 | H8 | PRP | 29 | 19.942 | 15.047 | 49.103 | 1.00 | 0.00 |
| H      |      |    |     |    |        |        |        |      |      |
| HETATM | 1474 | O1 | PRP | 30 | 12.579 | 13.305 | 50.923 | 1.00 | 0.00 |
| O      |      |    |     |    |        |        |        |      |      |
| HETATM | 1475 | H1 | PRP | 30 | 13.254 | 13.479 | 50.263 | 1.00 | 0.00 |
| H      |      |    |     |    |        |        |        |      |      |
| HETATM | 1476 | C1 | PRP | 30 | 12.565 | 14.507 | 51.700 | 1.00 | 0.00 |
| C      |      |    |     |    |        |        |        |      |      |
| HETATM | 1477 | H2 | PRP | 30 | 12.157 | 15.238 | 51.002 | 1.00 | 0.00 |
| H      |      |    |     |    |        |        |        |      |      |
| HETATM | 1478 | H3 | PRP | 30 | 11.904 | 14.327 | 52.548 | 1.00 | 0.00 |
| H      |      |    |     |    |        |        |        |      |      |
| HETATM | 1479 | C2 | PRP | 30 | 13.965 | 14.855 | 52.316 | 1.00 | 0.00 |
| C      |      |    |     |    |        |        |        |      |      |
| HETATM | 1480 | H4 | PRP | 30 | 13.880 | 15.806 | 52.842 | 1.00 | 0.00 |
| H      |      |    |     |    |        |        |        |      |      |
| HETATM | 1481 | O2 | PRP | 30 | 14.940 | 15.048 | 51.317 | 1.00 | 0.00 |
| O      |      |    |     |    |        |        |        |      |      |
| HETATM | 1482 | H5 | PRP | 30 | 14.577 | 15.682 | 50.695 | 1.00 | 0.00 |
| H      |      |    |     |    |        |        |        |      |      |
| HETATM | 1483 | C3 | PRP | 30 | 14.428 | 13.767 | 53.323 | 1.00 | 0.00 |
| C      |      |    |     |    |        |        |        |      |      |



|        |      |    |     |    |        |         |        |      |      |
|--------|------|----|-----|----|--------|---------|--------|------|------|
| HETATM | 1484 | H6 | PRP | 30 | 14.695 | 12.849  | 52.799 | 1.00 | 0.00 |
| H      |      |    |     |    |        |         |        |      |      |
| HETATM | 1485 | H7 | PRP | 30 | 15.290 | 14.092  | 53.905 | 1.00 | 0.00 |
| H      |      |    |     |    |        |         |        |      |      |
| HETATM | 1486 | H8 | PRP | 30 | 13.682 | 13.435  | 54.045 | 1.00 | 0.00 |
| H      |      |    |     |    |        |         |        |      |      |
| HETATM | 1487 | O1 | PRP | 31 | 14.985 | 15.797  | 43.736 | 1.00 | 0.00 |
| O      |      |    |     |    |        |         |        |      |      |
| HETATM | 1488 | H1 | PRP | 31 | 14.964 | 16.715  | 43.458 | 1.00 | 0.00 |
| H      |      |    |     |    |        |         |        |      |      |
| HETATM | 1489 | C1 | PRP | 31 | 15.480 | 15.069  | 42.665 | 1.00 | 0.00 |
| C      |      |    |     |    |        |         |        |      |      |
| HETATM | 1490 | H2 | PRP | 31 | 15.947 | 14.147  | 43.013 | 1.00 | 0.00 |
| H      |      |    |     |    |        |         |        |      |      |
| HETATM | 1491 | H3 | PRP | 31 | 14.601 | 14.897  | 42.046 | 1.00 | 0.00 |
| H      |      |    |     |    |        |         |        |      |      |
| HETATM | 1492 | C2 | PRP | 31 | 16.480 | 15.953  | 41.962 | 1.00 | 0.00 |
| C      |      |    |     |    |        |         |        |      |      |
| HETATM | 1493 | H4 | PRP | 31 | 17.357 | 15.963  | 42.609 | 1.00 | 0.00 |
| H      |      |    |     |    |        |         |        |      |      |
| HETATM | 1494 | O2 | PRP | 31 | 16.044 | 17.296  | 41.764 | 1.00 | 0.00 |
| O      |      |    |     |    |        |         |        |      |      |
| HETATM | 1495 | H5 | PRP | 31 | 16.626 | 17.694  | 41.113 | 1.00 | 0.00 |
| H      |      |    |     |    |        |         |        |      |      |
| HETATM | 1496 | C3 | PRP | 31 | 16.897 | 15.317  | 40.574 | 1.00 | 0.00 |
| C      |      |    |     |    |        |         |        |      |      |
| HETATM | 1497 | H6 | PRP | 31 | 17.973 | 15.149  | 40.630 | 1.00 | 0.00 |
| H      |      |    |     |    |        |         |        |      |      |
| HETATM | 1498 | H7 | PRP | 31 | 16.247 | 14.448  | 40.473 | 1.00 | 0.00 |
| H      |      |    |     |    |        |         |        |      |      |
| HETATM | 1499 | H8 | PRP | 31 | 16.602 | 15.910  | 39.709 | 1.00 | 0.00 |
| H      |      |    |     |    |        |         |        |      |      |
| HETATM | 1500 | O1 | PRP | 32 | 22.542 | -9.552  | 40.180 | 1.00 | 0.00 |
| O      |      |    |     |    |        |         |        |      |      |
| HETATM | 1501 | H1 | PRP | 32 | 21.854 | -9.016  | 40.581 | 1.00 | 0.00 |
| H      |      |    |     |    |        |         |        |      |      |
| HETATM | 1502 | C1 | PRP | 32 | 23.654 | -8.752  | 40.023 | 1.00 | 0.00 |
| C      |      |    |     |    |        |         |        |      |      |
| HETATM | 1503 | H2 | PRP | 32 | 23.649 | -7.965  | 40.777 | 1.00 | 0.00 |
| H      |      |    |     |    |        |         |        |      |      |
| HETATM | 1504 | H3 | PRP | 32 | 24.597 | -9.237  | 40.278 | 1.00 | 0.00 |
| H      |      |    |     |    |        |         |        |      |      |
| HETATM | 1505 | C2 | PRP | 32 | 23.697 | -8.237  | 38.607 | 1.00 | 0.00 |
| C      |      |    |     |    |        |         |        |      |      |
| HETATM | 1506 | H4 | PRP | 32 | 22.778 | -7.686  | 38.406 | 1.00 | 0.00 |
| H      |      |    |     |    |        |         |        |      |      |
| HETATM | 1507 | O2 | PRP | 32 | 23.952 | -9.175  | 37.573 | 1.00 | 0.00 |
| O      |      |    |     |    |        |         |        |      |      |
| HETATM | 1508 | H5 | PRP | 32 | 23.644 | -10.070 | 37.733 | 1.00 | 0.00 |
| H      |      |    |     |    |        |         |        |      |      |
| HETATM | 1509 | C3 | PRP | 32 | 24.765 | -7.240  | 38.462 | 1.00 | 0.00 |
| C      |      |    |     |    |        |         |        |      |      |
| HETATM | 1510 | H6 | PRP | 32 | 25.758 | -7.678  | 38.362 | 1.00 | 0.00 |
| H      |      |    |     |    |        |         |        |      |      |
| HETATM | 1511 | H7 | PRP | 32 | 24.583 | -6.549  | 37.639 | 1.00 | 0.00 |
| H      |      |    |     |    |        |         |        |      |      |

|        |      |    |     |    |        |        |        |      |      |
|--------|------|----|-----|----|--------|--------|--------|------|------|
| HETATM | 1512 | H8 | PRP | 32 | 24.693 | -6.499 | 39.259 | 1.00 | 0.00 |
| H      |      |    |     |    |        |        |        |      |      |
| HETATM | 1513 | O1 | PRP | 33 | 20.358 | 7.987  | 58.645 | 1.00 | 0.00 |
| O      |      |    |     |    |        |        |        |      |      |
| HETATM | 1514 | H1 | PRP | 33 | 19.862 | 7.185  | 58.464 | 1.00 | 0.00 |
| H      |      |    |     |    |        |        |        |      |      |
| HETATM | 1515 | C1 | PRP | 33 | 21.709 | 7.798  | 58.218 | 1.00 | 0.00 |
| C      |      |    |     |    |        |        |        |      |      |
| HETATM | 1516 | H2 | PRP | 33 | 22.346 | 7.654  | 59.091 | 1.00 | 0.00 |
| H      |      |    |     |    |        |        |        |      |      |
| HETATM | 1517 | H3 | PRP | 33 | 21.630 | 6.901  | 57.605 | 1.00 | 0.00 |
| H      |      |    |     |    |        |        |        |      |      |
| HETATM | 1518 | C2 | PRP | 33 | 22.127 | 9.119  | 57.554 | 1.00 | 0.00 |
| C      |      |    |     |    |        |        |        |      |      |
| HETATM | 1519 | H4 | PRP | 33 | 21.952 | 9.852  | 58.342 | 1.00 | 0.00 |
| H      |      |    |     |    |        |        |        |      |      |
| HETATM | 1520 | O2 | PRP | 33 | 21.210 | 9.235  | 56.492 | 1.00 | 0.00 |
| O      |      |    |     |    |        |        |        |      |      |
| HETATM | 1521 | H5 | PRP | 33 | 20.326 | 9.002  | 56.784 | 1.00 | 0.00 |
| H      |      |    |     |    |        |        |        |      |      |
| HETATM | 1522 | C3 | PRP | 33 | 23.574 | 9.052  | 57.110 | 1.00 | 0.00 |
| C      |      |    |     |    |        |        |        |      |      |
| HETATM | 1523 | H6 | PRP | 33 | 23.942 | 9.960  | 56.633 | 1.00 | 0.00 |
| H      |      |    |     |    |        |        |        |      |      |
| HETATM | 1524 | H7 | PRP | 33 | 24.227 | 8.887  | 57.967 | 1.00 | 0.00 |
| H      |      |    |     |    |        |        |        |      |      |
| HETATM | 1525 | H8 | PRP | 33 | 23.522 | 8.360  | 56.269 | 1.00 | 0.00 |
| H      |      |    |     |    |        |        |        |      |      |
| HETATM | 1526 | O1 | PRP | 34 | 27.540 | 4.748  | 39.108 | 1.00 | 0.00 |
| O      |      |    |     |    |        |        |        |      |      |
| HETATM | 1527 | H1 | PRP | 34 | 27.571 | 4.279  | 38.271 | 1.00 | 0.00 |
| H      |      |    |     |    |        |        |        |      |      |
| HETATM | 1528 | C1 | PRP | 34 | 28.529 | 4.294  | 40.031 | 1.00 | 0.00 |
| C      |      |    |     |    |        |        |        |      |      |
| HETATM | 1529 | H2 | PRP | 34 | 28.197 | 3.325  | 40.404 | 1.00 | 0.00 |
| H      |      |    |     |    |        |        |        |      |      |
| HETATM | 1530 | H3 | PRP | 34 | 29.522 | 4.174  | 39.597 | 1.00 | 0.00 |
| H      |      |    |     |    |        |        |        |      |      |
| HETATM | 1531 | C2 | PRP | 34 | 28.596 | 5.107  | 41.345 | 1.00 | 0.00 |
| C      |      |    |     |    |        |        |        |      |      |
| HETATM | 1532 | H4 | PRP | 34 | 29.136 | 4.400  | 41.975 | 1.00 | 0.00 |
| H      |      |    |     |    |        |        |        |      |      |
| HETATM | 1533 | O2 | PRP | 34 | 27.310 | 5.346  | 41.846 | 1.00 | 0.00 |
| O      |      |    |     |    |        |        |        |      |      |
| HETATM | 1534 | H5 | PRP | 34 | 26.829 | 5.885  | 41.215 | 1.00 | 0.00 |
| H      |      |    |     |    |        |        |        |      |      |
| HETATM | 1535 | C3 | PRP | 34 | 29.329 | 6.411  | 41.280 | 1.00 | 0.00 |
| C      |      |    |     |    |        |        |        |      |      |
| HETATM | 1536 | H6 | PRP | 34 | 29.867 | 6.683  | 42.188 | 1.00 | 0.00 |
| H      |      |    |     |    |        |        |        |      |      |
| HETATM | 1537 | H7 | PRP | 34 | 30.123 | 6.263  | 40.548 | 1.00 | 0.00 |
| H      |      |    |     |    |        |        |        |      |      |
| HETATM | 1538 | H8 | PRP | 34 | 28.603 | 7.170  | 40.988 | 1.00 | 0.00 |
| H      |      |    |     |    |        |        |        |      |      |
| HETATM | 1539 | O1 | PRP | 35 | 35.496 | 16.708 | 53.907 | 1.00 | 0.00 |
| O      |      |    |     |    |        |        |        |      |      |

|        |      |    |     |    |        |        |        |      |      |
|--------|------|----|-----|----|--------|--------|--------|------|------|
| HETATM | 1540 | H1 | PRP | 35 | 34.755 | 16.429 | 54.450 | 1.00 | 0.00 |
| H      |      |    |     |    |        |        |        |      |      |
| HETATM | 1541 | C1 | PRP | 35 | 36.473 | 17.283 | 54.842 | 1.00 | 0.00 |
| C      |      |    |     |    |        |        |        |      |      |
| HETATM | 1542 | H2 | PRP | 35 | 35.985 | 17.262 | 55.817 | 1.00 | 0.00 |
| H      |      |    |     |    |        |        |        |      |      |
| HETATM | 1543 | H3 | PRP | 35 | 37.371 | 16.671 | 54.751 | 1.00 | 0.00 |
| H      |      |    |     |    |        |        |        |      |      |
| HETATM | 1544 | C2 | PRP | 35 | 36.752 | 18.804 | 54.656 | 1.00 | 0.00 |
| C      |      |    |     |    |        |        |        |      |      |
| HETATM | 1545 | H4 | PRP | 35 | 37.682 | 18.986 | 55.194 | 1.00 | 0.00 |
| H      |      |    |     |    |        |        |        |      |      |
| HETATM | 1546 | O2 | PRP | 35 | 35.608 | 19.551 | 55.102 | 1.00 | 0.00 |
| O      |      |    |     |    |        |        |        |      |      |
| HETATM | 1547 | H5 | PRP | 35 | 34.781 | 19.395 | 54.640 | 1.00 | 0.00 |
| H      |      |    |     |    |        |        |        |      |      |
| HETATM | 1548 | C3 | PRP | 35 | 37.037 | 19.178 | 53.181 | 1.00 | 0.00 |
| C      |      |    |     |    |        |        |        |      |      |
| HETATM | 1549 | H6 | PRP | 35 | 36.139 | 19.137 | 52.565 | 1.00 | 0.00 |
| H      |      |    |     |    |        |        |        |      |      |
| HETATM | 1550 | H7 | PRP | 35 | 37.267 | 20.242 | 53.121 | 1.00 | 0.00 |
| H      |      |    |     |    |        |        |        |      |      |
| HETATM | 1551 | H8 | PRP | 35 | 37.764 | 18.448 | 52.824 | 1.00 | 0.00 |
| H      |      |    |     |    |        |        |        |      |      |
| HETATM | 1552 | O1 | PRP | 36 | 28.263 | 22.436 | 58.126 | 1.00 | 0.00 |
| O      |      |    |     |    |        |        |        |      |      |
| HETATM | 1553 | H1 | PRP | 36 | 28.647 | 22.181 | 57.284 | 1.00 | 0.00 |
| H      |      |    |     |    |        |        |        |      |      |
| HETATM | 1554 | C1 | PRP | 36 | 26.847 | 22.363 | 57.991 | 1.00 | 0.00 |
| C      |      |    |     |    |        |        |        |      |      |
| HETATM | 1555 | H2 | PRP | 36 | 26.417 | 23.274 | 57.577 | 1.00 | 0.00 |
| H      |      |    |     |    |        |        |        |      |      |
| HETATM | 1556 | H3 | PRP | 36 | 26.626 | 21.458 | 57.425 | 1.00 | 0.00 |
| H      |      |    |     |    |        |        |        |      |      |
| HETATM | 1557 | C2 | PRP | 36 | 26.066 | 22.307 | 59.289 | 1.00 | 0.00 |
| C      |      |    |     |    |        |        |        |      |      |
| HETATM | 1558 | H4 | PRP | 36 | 25.023 | 22.418 | 58.994 | 1.00 | 0.00 |
| H      |      |    |     |    |        |        |        |      |      |
| HETATM | 1559 | O2 | PRP | 36 | 26.690 | 23.097 | 60.226 | 1.00 | 0.00 |
| O      |      |    |     |    |        |        |        |      |      |
| HETATM | 1560 | H5 | PRP | 36 | 27.592 | 23.106 | 59.899 | 1.00 | 0.00 |
| H      |      |    |     |    |        |        |        |      |      |
| HETATM | 1561 | C3 | PRP | 36 | 26.276 | 20.922 | 59.828 | 1.00 | 0.00 |
| C      |      |    |     |    |        |        |        |      |      |
| HETATM | 1562 | H6 | PRP | 36 | 27.329 | 20.679 | 59.685 | 1.00 | 0.00 |
| H      |      |    |     |    |        |        |        |      |      |
| HETATM | 1563 | H7 | PRP | 36 | 26.083 | 20.782 | 60.891 | 1.00 | 0.00 |
| H      |      |    |     |    |        |        |        |      |      |
| HETATM | 1564 | H8 | PRP | 36 | 25.798 | 20.228 | 59.137 | 1.00 | 0.00 |
| H      |      |    |     |    |        |        |        |      |      |
| HETATM | 1565 | O1 | PRP | 37 | 22.256 | 18.068 | 37.183 | 1.00 | 0.00 |
| O      |      |    |     |    |        |        |        |      |      |
| HETATM | 1566 | H1 | PRP | 37 | 21.454 | 18.482 | 37.510 | 1.00 | 0.00 |
| H      |      |    |     |    |        |        |        |      |      |
| HETATM | 1567 | C1 | PRP | 37 | 23.391 | 18.238 | 38.066 | 1.00 | 0.00 |
| C      |      |    |     |    |        |        |        |      |      |

|        |      |    |     |    |        |        |        |      |      |
|--------|------|----|-----|----|--------|--------|--------|------|------|
| HETATM | 1568 | H2 | PRP | 37 | 23.342 | 19.266 | 38.426 | 1.00 | 0.00 |
| H      |      |    |     |    |        |        |        |      |      |
| HETATM | 1569 | H3 | PRP | 37 | 23.343 | 17.570 | 38.926 | 1.00 | 0.00 |
| H      |      |    |     |    |        |        |        |      |      |
| HETATM | 1570 | C2 | PRP | 37 | 24.739 | 18.100 | 37.346 | 1.00 | 0.00 |
| C      |      |    |     |    |        |        |        |      |      |
| HETATM | 1571 | H4 | PRP | 37 | 24.625 | 18.720 | 36.457 | 1.00 | 0.00 |
| H      |      |    |     |    |        |        |        |      |      |
| HETATM | 1572 | O2 | PRP | 37 | 25.005 | 16.784 | 36.946 | 1.00 | 0.00 |
| O      |      |    |     |    |        |        |        |      |      |
| HETATM | 1573 | H5 | PRP | 37 | 24.154 | 16.382 | 36.756 | 1.00 | 0.00 |
| H      |      |    |     |    |        |        |        |      |      |
| HETATM | 1574 | C3 | PRP | 37 | 25.871 | 18.679 | 38.236 | 1.00 | 0.00 |
| C      |      |    |     |    |        |        |        |      |      |
| HETATM | 1575 | H6 | PRP | 37 | 26.007 | 19.724 | 37.959 | 1.00 | 0.00 |
| H      |      |    |     |    |        |        |        |      |      |
| HETATM | 1576 | H7 | PRP | 37 | 25.579 | 18.489 | 39.269 | 1.00 | 0.00 |
| H      |      |    |     |    |        |        |        |      |      |
| HETATM | 1577 | H8 | PRP | 37 | 26.891 | 18.295 | 38.216 | 1.00 | 0.00 |
| H      |      |    |     |    |        |        |        |      |      |
| HETATM | 1578 | O1 | PRP | 38 | 10.721 | -4.642 | 32.747 | 1.00 | 0.00 |
| O      |      |    |     |    |        |        |        |      |      |
| HETATM | 1579 | H1 | PRP | 38 | 10.527 | -3.852 | 32.237 | 1.00 | 0.00 |
| H      |      |    |     |    |        |        |        |      |      |
| HETATM | 1580 | C1 | PRP | 38 | 9.675  | -5.558 | 32.533 | 1.00 | 0.00 |
| C      |      |    |     |    |        |        |        |      |      |
| HETATM | 1581 | H2 | PRP | 38 | 9.014  | -5.438 | 33.391 | 1.00 | 0.00 |
| H      |      |    |     |    |        |        |        |      |      |
| HETATM | 1582 | H3 | PRP | 38 | 9.172  | -5.405 | 31.577 | 1.00 | 0.00 |
| H      |      |    |     |    |        |        |        |      |      |
| HETATM | 1583 | C2 | PRP | 38 | 10.304 | -6.945 | 32.539 | 1.00 | 0.00 |
| C      |      |    |     |    |        |        |        |      |      |
| HETATM | 1584 | H4 | PRP | 38 | 10.999 | -6.944 | 33.378 | 1.00 | 0.00 |
| H      |      |    |     |    |        |        |        |      |      |
| HETATM | 1585 | O2 | PRP | 38 | 11.017 | -7.102 | 31.320 | 1.00 | 0.00 |
| O      |      |    |     |    |        |        |        |      |      |
| HETATM | 1586 | H5 | PRP | 38 | 11.854 | -7.455 | 31.630 | 1.00 | 0.00 |
| H      |      |    |     |    |        |        |        |      |      |
| HETATM | 1587 | C3 | PRP | 38 | 9.176  | -8.006 | 32.826 | 1.00 | 0.00 |
| C      |      |    |     |    |        |        |        |      |      |
| HETATM | 1588 | H6 | PRP | 38 | 9.512  | -9.042 | 32.794 | 1.00 | 0.00 |
| H      |      |    |     |    |        |        |        |      |      |
| HETATM | 1589 | H7 | PRP | 38 | 8.908  | -7.816 | 33.866 | 1.00 | 0.00 |
| H      |      |    |     |    |        |        |        |      |      |
| HETATM | 1590 | H8 | PRP | 38 | 8.271  | -7.805 | 32.253 | 1.00 | 0.00 |
| H      |      |    |     |    |        |        |        |      |      |
| HETATM | 1591 | O1 | PRP | 39 | 16.860 | 5.504  | 48.698 | 1.00 | 0.00 |
| O      |      |    |     |    |        |        |        |      |      |
| HETATM | 1592 | H1 | PRP | 39 | 16.750 | 4.569  | 48.511 | 1.00 | 0.00 |
| H      |      |    |     |    |        |        |        |      |      |
| HETATM | 1593 | C1 | PRP | 39 | 17.177 | 6.212  | 47.543 | 1.00 | 0.00 |
| C      |      |    |     |    |        |        |        |      |      |
| HETATM | 1594 | H2 | PRP | 39 | 16.475 | 6.156  | 46.711 | 1.00 | 0.00 |
| H      |      |    |     |    |        |        |        |      |      |
| HETATM | 1595 | H3 | PRP | 39 | 17.214 | 7.208  | 47.984 | 1.00 | 0.00 |
| H      |      |    |     |    |        |        |        |      |      |

|        |      |    |     |    |        |        |        |      |      |
|--------|------|----|-----|----|--------|--------|--------|------|------|
| HETATM | 1596 | C2 | PRP | 39 | 18.619 | 5.833  | 47.080 | 1.00 | 0.00 |
| C      |      |    |     |    |        |        |        |      |      |
| HETATM | 1597 | H4 | PRP | 39 | 18.640 | 4.811  | 46.700 | 1.00 | 0.00 |
| H      |      |    |     |    |        |        |        |      |      |
| HETATM | 1598 | O2 | PRP | 39 | 19.519 | 5.956  | 48.185 | 1.00 | 0.00 |
| O      |      |    |     |    |        |        |        |      |      |
| HETATM | 1599 | H5 | PRP | 39 | 20.392 | 5.721  | 47.862 | 1.00 | 0.00 |
| H      |      |    |     |    |        |        |        |      |      |
| HETATM | 1600 | C3 | PRP | 39 | 19.119 | 6.585  | 45.834 | 1.00 | 0.00 |
| C      |      |    |     |    |        |        |        |      |      |
| HETATM | 1601 | H6 | PRP | 39 | 18.587 | 6.107  | 45.011 | 1.00 | 0.00 |
| H      |      |    |     |    |        |        |        |      |      |
| HETATM | 1602 | H7 | PRP | 39 | 18.962 | 7.662  | 45.887 | 1.00 | 0.00 |
| H      |      |    |     |    |        |        |        |      |      |
| HETATM | 1603 | H8 | PRP | 39 | 20.180 | 6.413  | 45.654 | 1.00 | 0.00 |
| H      |      |    |     |    |        |        |        |      |      |
| HETATM | 1604 | O1 | PRP | 40 | 11.997 | 6.469  | 51.921 | 1.00 | 0.00 |
| O      |      |    |     |    |        |        |        |      |      |
| HETATM | 1605 | H1 | PRP | 40 | 12.379 | 6.660  | 52.781 | 1.00 | 0.00 |
| H      |      |    |     |    |        |        |        |      |      |
| HETATM | 1606 | C1 | PRP | 40 | 12.780 | 7.159  | 50.974 | 1.00 | 0.00 |
| C      |      |    |     |    |        |        |        |      |      |
| HETATM | 1607 | H2 | PRP | 40 | 13.790 | 6.776  | 50.831 | 1.00 | 0.00 |
| H      |      |    |     |    |        |        |        |      |      |
| HETATM | 1608 | H3 | PRP | 40 | 12.292 | 7.108  | 50.000 | 1.00 | 0.00 |
| H      |      |    |     |    |        |        |        |      |      |
| HETATM | 1609 | C2 | PRP | 40 | 13.020 | 8.644  | 51.381 | 1.00 | 0.00 |
| C      |      |    |     |    |        |        |        |      |      |
| HETATM | 1610 | H4 | PRP | 40 | 13.523 | 9.255  | 50.632 | 1.00 | 0.00 |
| H      |      |    |     |    |        |        |        |      |      |
| HETATM | 1611 | O2 | PRP | 40 | 13.636 | 8.684  | 52.681 | 1.00 | 0.00 |
| O      |      |    |     |    |        |        |        |      |      |
| HETATM | 1612 | H5 | PRP | 40 | 14.121 | 9.498  | 52.839 | 1.00 | 0.00 |
| H      |      |    |     |    |        |        |        |      |      |
| HETATM | 1613 | C3 | PRP | 40 | 11.704 | 9.430  | 51.567 | 1.00 | 0.00 |
| C      |      |    |     |    |        |        |        |      |      |
| HETATM | 1614 | H6 | PRP | 40 | 10.833 | 8.847  | 51.864 | 1.00 | 0.00 |
| H      |      |    |     |    |        |        |        |      |      |
| HETATM | 1615 | H7 | PRP | 40 | 11.871 | 10.236 | 52.282 | 1.00 | 0.00 |
| H      |      |    |     |    |        |        |        |      |      |
| HETATM | 1616 | H8 | PRP | 40 | 11.392 | 9.979  | 50.678 | 1.00 | 0.00 |
| H      |      |    |     |    |        |        |        |      |      |
| HETATM | 1617 | O1 | PRP | 41 | 11.378 | -5.951 | 41.292 | 1.00 | 0.00 |
| O      |      |    |     |    |        |        |        |      |      |
| HETATM | 1618 | H1 | PRP | 41 | 12.242 | -5.883 | 40.880 | 1.00 | 0.00 |
| H      |      |    |     |    |        |        |        |      |      |
| HETATM | 1619 | C1 | PRP | 41 | 11.297 | -4.779 | 42.115 | 1.00 | 0.00 |
| C      |      |    |     |    |        |        |        |      |      |
| HETATM | 1620 | H2 | PRP | 41 | 10.275 | -4.666 | 42.477 | 1.00 | 0.00 |
| H      |      |    |     |    |        |        |        |      |      |
| HETATM | 1621 | H3 | PRP | 41 | 12.040 | -4.822 | 42.911 | 1.00 | 0.00 |
| H      |      |    |     |    |        |        |        |      |      |
| HETATM | 1622 | C2 | PRP | 41 | 11.574 | -3.552 | 41.229 | 1.00 | 0.00 |
| C      |      |    |     |    |        |        |        |      |      |
| HETATM | 1623 | H4 | PRP | 41 | 10.895 | -3.538 | 40.376 | 1.00 | 0.00 |
| H      |      |    |     |    |        |        |        |      |      |

|        |      |    |     |    |        |        |        |      |      |
|--------|------|----|-----|----|--------|--------|--------|------|------|
| HETATM | 1624 | O2 | PRP | 41 | 12.897 | -3.564 | 40.783 | 1.00 | 0.00 |
| O      |      |    |     |    |        |        |        |      |      |
| HETATM | 1625 | H5 | PRP | 41 | 13.500 | -3.327 | 41.491 | 1.00 | 0.00 |
| H      |      |    |     |    |        |        |        |      |      |
| HETATM | 1626 | C3 | PRP | 41 | 11.454 | -2.200 | 42.021 | 1.00 | 0.00 |
| C      |      |    |     |    |        |        |        |      |      |
| HETATM | 1627 | H6 | PRP | 41 | 11.451 | -1.335 | 41.358 | 1.00 | 0.00 |
| H      |      |    |     |    |        |        |        |      |      |
| HETATM | 1628 | H7 | PRP | 41 | 10.599 | -2.096 | 42.689 | 1.00 | 0.00 |
| H      |      |    |     |    |        |        |        |      |      |
| HETATM | 1629 | H8 | PRP | 41 | 12.348 | -2.003 | 42.612 | 1.00 | 0.00 |
| H      |      |    |     |    |        |        |        |      |      |
| HETATM | 1630 | O1 | PRP | 42 | 34.124 | 1.798  | 37.809 | 1.00 | 0.00 |
| O      |      |    |     |    |        |        |        |      |      |
| HETATM | 1631 | H1 | PRP | 42 | 34.104 | 1.575  | 38.743 | 1.00 | 0.00 |
| H      |      |    |     |    |        |        |        |      |      |
| HETATM | 1632 | C1 | PRP | 42 | 34.705 | 0.774  | 37.112 | 1.00 | 0.00 |
| C      |      |    |     |    |        |        |        |      |      |
| HETATM | 1633 | H2 | PRP | 42 | 35.623 | 1.184  | 36.690 | 1.00 | 0.00 |
| H      |      |    |     |    |        |        |        |      |      |
| HETATM | 1634 | H3 | PRP | 42 | 34.829 | -0.061 | 37.801 | 1.00 | 0.00 |
| H      |      |    |     |    |        |        |        |      |      |
| HETATM | 1635 | C2 | PRP | 42 | 33.775 | 0.320  | 35.977 | 1.00 | 0.00 |
| C      |      |    |     |    |        |        |        |      |      |
| HETATM | 1636 | H4 | PRP | 42 | 33.459 | 1.187  | 35.398 | 1.00 | 0.00 |
| H      |      |    |     |    |        |        |        |      |      |
| HETATM | 1637 | O2 | PRP | 42 | 32.674 | -0.472 | 36.506 | 1.00 | 0.00 |
| O      |      |    |     |    |        |        |        |      |      |
| HETATM | 1638 | H5 | PRP | 42 | 32.126 | 0.143  | 36.999 | 1.00 | 0.00 |
| H      |      |    |     |    |        |        |        |      |      |
| HETATM | 1639 | C3 | PRP | 42 | 34.553 | -0.535 | 34.952 | 1.00 | 0.00 |
| C      |      |    |     |    |        |        |        |      |      |
| HETATM | 1640 | H6 | PRP | 42 | 33.891 | -0.764 | 34.117 | 1.00 | 0.00 |
| H      |      |    |     |    |        |        |        |      |      |
| HETATM | 1641 | H7 | PRP | 42 | 35.467 | -0.024 | 34.650 | 1.00 | 0.00 |
| H      |      |    |     |    |        |        |        |      |      |
| HETATM | 1642 | H8 | PRP | 42 | 34.842 | -1.536 | 35.272 | 1.00 | 0.00 |
| H      |      |    |     |    |        |        |        |      |      |
| HETATM | 1643 | O1 | PRP | 43 | 18.717 | 4.094  | 40.802 | 1.00 | 0.00 |
| O      |      |    |     |    |        |        |        |      |      |
| HETATM | 1644 | H1 | PRP | 43 | 19.559 | 3.907  | 40.382 | 1.00 | 0.00 |
| H      |      |    |     |    |        |        |        |      |      |
| HETATM | 1645 | C1 | PRP | 43 | 18.492 | 3.250  | 41.933 | 1.00 | 0.00 |
| C      |      |    |     |    |        |        |        |      |      |
| HETATM | 1646 | H2 | PRP | 43 | 17.604 | 3.582  | 42.471 | 1.00 | 0.00 |
| H      |      |    |     |    |        |        |        |      |      |
| HETATM | 1647 | H3 | PRP | 43 | 18.452 | 2.206  | 41.620 | 1.00 | 0.00 |
| H      |      |    |     |    |        |        |        |      |      |
| HETATM | 1648 | C2 | PRP | 43 | 19.686 | 3.306  | 42.887 | 1.00 | 0.00 |
| C      |      |    |     |    |        |        |        |      |      |
| HETATM | 1649 | H4 | PRP | 43 | 19.833 | 4.372  | 43.062 | 1.00 | 0.00 |
| H      |      |    |     |    |        |        |        |      |      |
| HETATM | 1650 | O2 | PRP | 43 | 20.887 | 2.729  | 42.315 | 1.00 | 0.00 |
| O      |      |    |     |    |        |        |        |      |      |
| HETATM | 1651 | H5 | PRP | 43 | 21.450 | 3.496  | 42.188 | 1.00 | 0.00 |
| H      |      |    |     |    |        |        |        |      |      |

|        |      |    |     |    |        |       |        |      |      |
|--------|------|----|-----|----|--------|-------|--------|------|------|
| HETATM | 1652 | C3 | PRP | 43 | 19.342 | 2.536 | 44.146 | 1.00 | 0.00 |
| C      |      |    |     |    |        |       |        |      |      |
| HETATM | 1653 | H6 | PRP | 43 | 18.969 | 1.532 | 43.944 | 1.00 | 0.00 |
| H      |      |    |     |    |        |       |        |      |      |
| HETATM | 1654 | H7 | PRP | 43 | 20.228 | 2.427 | 44.771 | 1.00 | 0.00 |
| H      |      |    |     |    |        |       |        |      |      |
| HETATM | 1655 | H8 | PRP | 43 | 18.511 | 3.062 | 44.615 | 1.00 | 0.00 |
| H      |      |    |     |    |        |       |        |      |      |
| HETATM | 1656 | O1 | PRP | 44 | 51.207 | 4.109 | 37.725 | 1.00 | 0.00 |
| O      |      |    |     |    |        |       |        |      |      |
| HETATM | 1657 | H1 | PRP | 44 | 51.859 | 4.323 | 37.053 | 1.00 | 0.00 |
| H      |      |    |     |    |        |       |        |      |      |
| HETATM | 1658 | C1 | PRP | 44 | 51.771 | 4.542 | 38.913 | 1.00 | 0.00 |
| C      |      |    |     |    |        |       |        |      |      |
| HETATM | 1659 | H2 | PRP | 44 | 51.131 | 4.443 | 39.790 | 1.00 | 0.00 |
| H      |      |    |     |    |        |       |        |      |      |
| HETATM | 1660 | H3 | PRP | 44 | 52.666 | 3.935 | 39.051 | 1.00 | 0.00 |
| H      |      |    |     |    |        |       |        |      |      |
| HETATM | 1661 | C2 | PRP | 44 | 52.136 | 5.999 | 38.705 | 1.00 | 0.00 |
| C      |      |    |     |    |        |       |        |      |      |
| HETATM | 1662 | H4 | PRP | 44 | 51.415 | 6.623 | 38.177 | 1.00 | 0.00 |
| H      |      |    |     |    |        |       |        |      |      |
| HETATM | 1663 | O2 | PRP | 44 | 53.321 | 5.960 | 37.856 | 1.00 | 0.00 |
| O      |      |    |     |    |        |       |        |      |      |
| HETATM | 1664 | H5 | PRP | 44 | 53.206 | 6.642 | 37.190 | 1.00 | 0.00 |
| H      |      |    |     |    |        |       |        |      |      |
| HETATM | 1665 | C3 | PRP | 44 | 52.527 | 6.635 | 40.037 | 1.00 | 0.00 |
| C      |      |    |     |    |        |       |        |      |      |
| HETATM | 1666 | H6 | PRP | 44 | 52.757 | 7.689 | 39.880 | 1.00 | 0.00 |
| H      |      |    |     |    |        |       |        |      |      |
| HETATM | 1667 | H7 | PRP | 44 | 51.634 | 6.556 | 40.657 | 1.00 | 0.00 |
| H      |      |    |     |    |        |       |        |      |      |
| HETATM | 1668 | H8 | PRP | 44 | 53.410 | 6.179 | 40.486 | 1.00 | 0.00 |
| H      |      |    |     |    |        |       |        |      |      |
| HETATM | 1669 | O1 | PRP | 45 | 23.848 | 2.356 | 37.873 | 1.00 | 0.00 |
| O      |      |    |     |    |        |       |        |      |      |
| HETATM | 1670 | H1 | PRP | 45 | 24.484 | 2.318 | 37.155 | 1.00 | 0.00 |
| H      |      |    |     |    |        |       |        |      |      |
| HETATM | 1671 | C1 | PRP | 45 | 23.389 | 3.680 | 37.930 | 1.00 | 0.00 |
| C      |      |    |     |    |        |       |        |      |      |
| HETATM | 1672 | H2 | PRP | 45 | 22.706 | 3.929 | 38.743 | 1.00 | 0.00 |
| H      |      |    |     |    |        |       |        |      |      |
| HETATM | 1673 | H3 | PRP | 45 | 24.173 | 4.398 | 38.171 | 1.00 | 0.00 |
| H      |      |    |     |    |        |       |        |      |      |
| HETATM | 1674 | C2 | PRP | 45 | 22.835 | 4.056 | 36.570 | 1.00 | 0.00 |
| C      |      |    |     |    |        |       |        |      |      |
| HETATM | 1675 | H4 | PRP | 45 | 21.912 | 3.539 | 36.307 | 1.00 | 0.00 |
| H      |      |    |     |    |        |       |        |      |      |
| HETATM | 1676 | O2 | PRP | 45 | 23.886 | 3.881 | 35.573 | 1.00 | 0.00 |
| O      |      |    |     |    |        |       |        |      |      |
| HETATM | 1677 | H5 | PRP | 45 | 23.695 | 3.049 | 35.134 | 1.00 | 0.00 |
| H      |      |    |     |    |        |       |        |      |      |
| HETATM | 1678 | C3 | PRP | 45 | 22.570 | 5.618 | 36.387 | 1.00 | 0.00 |
| C      |      |    |     |    |        |       |        |      |      |
| HETATM | 1679 | H6 | PRP | 45 | 23.509 | 6.157 | 36.514 | 1.00 | 0.00 |
| H      |      |    |     |    |        |       |        |      |      |

|        |      |    |     |    |        |        |        |      |      |
|--------|------|----|-----|----|--------|--------|--------|------|------|
| HETATM | 1680 | H7 | PRP | 45 | 22.289 | 5.678  | 35.336 | 1.00 | 0.00 |
| H      |      |    |     |    |        |        |        |      |      |
| HETATM | 1681 | H8 | PRP | 45 | 21.871 | 5.864  | 37.186 | 1.00 | 0.00 |
| H      |      |    |     |    |        |        |        |      |      |
| HETATM | 1682 | O1 | PRP | 46 | 27.055 | 2.865  | 33.292 | 1.00 | 0.00 |
| O      |      |    |     |    |        |        |        |      |      |
| HETATM | 1683 | H1 | PRP | 46 | 27.186 | 3.522  | 32.605 | 1.00 | 0.00 |
| H      |      |    |     |    |        |        |        |      |      |
| HETATM | 1684 | C1 | PRP | 46 | 26.715 | 1.731  | 32.522 | 1.00 | 0.00 |
| C      |      |    |     |    |        |        |        |      |      |
| HETATM | 1685 | H2 | PRP | 46 | 27.297 | 0.907  | 32.935 | 1.00 | 0.00 |
| H      |      |    |     |    |        |        |        |      |      |
| HETATM | 1686 | H3 | PRP | 46 | 25.641 | 1.552  | 32.566 | 1.00 | 0.00 |
| H      |      |    |     |    |        |        |        |      |      |
| HETATM | 1687 | C2 | PRP | 46 | 27.148 | 1.996  | 31.048 | 1.00 | 0.00 |
| C      |      |    |     |    |        |        |        |      |      |
| HETATM | 1688 | H4 | PRP | 46 | 28.231 | 2.028  | 30.928 | 1.00 | 0.00 |
| H      |      |    |     |    |        |        |        |      |      |
| HETATM | 1689 | O2 | PRP | 46 | 26.685 | 3.246  | 30.677 | 1.00 | 0.00 |
| O      |      |    |     |    |        |        |        |      |      |
| HETATM | 1690 | H5 | PRP | 46 | 26.927 | 3.401  | 29.761 | 1.00 | 0.00 |
| H      |      |    |     |    |        |        |        |      |      |
| HETATM | 1691 | C3 | PRP | 46 | 26.776 | 0.971  | 29.997 | 1.00 | 0.00 |
| C      |      |    |     |    |        |        |        |      |      |
| HETATM | 1692 | H6 | PRP | 46 | 25.743 | 0.639  | 30.109 | 1.00 | 0.00 |
| H      |      |    |     |    |        |        |        |      |      |
| HETATM | 1693 | H7 | PRP | 46 | 26.934 | 1.204  | 28.944 | 1.00 | 0.00 |
| H      |      |    |     |    |        |        |        |      |      |
| HETATM | 1694 | H8 | PRP | 46 | 27.419 | 0.099  | 30.115 | 1.00 | 0.00 |
| H      |      |    |     |    |        |        |        |      |      |
| HETATM | 1695 | O1 | PRP | 47 | 48.302 | 15.033 | 59.726 | 1.00 | 0.00 |
| O      |      |    |     |    |        |        |        |      |      |
| HETATM | 1696 | H1 | PRP | 47 | 48.233 | 14.347 | 60.393 | 1.00 | 0.00 |
| H      |      |    |     |    |        |        |        |      |      |
| HETATM | 1697 | C1 | PRP | 47 | 47.181 | 15.053 | 58.882 | 1.00 | 0.00 |
| C      |      |    |     |    |        |        |        |      |      |
| HETATM | 1698 | H2 | PRP | 47 | 46.901 | 14.057 | 58.540 | 1.00 | 0.00 |
| H      |      |    |     |    |        |        |        |      |      |
| HETATM | 1699 | H3 | PRP | 47 | 46.287 | 15.493 | 59.322 | 1.00 | 0.00 |
| H      |      |    |     |    |        |        |        |      |      |
| HETATM | 1700 | C2 | PRP | 47 | 47.512 | 15.991 | 57.602 | 1.00 | 0.00 |
| C      |      |    |     |    |        |        |        |      |      |
| HETATM | 1701 | H4 | PRP | 47 | 48.222 | 15.590 | 56.879 | 1.00 | 0.00 |
| H      |      |    |     |    |        |        |        |      |      |
| HETATM | 1702 | O2 | PRP | 47 | 47.859 | 17.210 | 58.148 | 1.00 | 0.00 |
| O      |      |    |     |    |        |        |        |      |      |
| HETATM | 1703 | H5 | PRP | 47 | 48.167 | 17.000 | 59.032 | 1.00 | 0.00 |
| H      |      |    |     |    |        |        |        |      |      |
| HETATM | 1704 | C3 | PRP | 47 | 46.196 | 16.315 | 56.851 | 1.00 | 0.00 |
| C      |      |    |     |    |        |        |        |      |      |
| HETATM | 1705 | H6 | PRP | 47 | 45.928 | 15.562 | 56.110 | 1.00 | 0.00 |
| H      |      |    |     |    |        |        |        |      |      |
| HETATM | 1706 | H7 | PRP | 47 | 45.365 | 16.474 | 57.538 | 1.00 | 0.00 |
| H      |      |    |     |    |        |        |        |      |      |
| HETATM | 1707 | H8 | PRP | 47 | 46.308 | 17.234 | 56.276 | 1.00 | 0.00 |
| H      |      |    |     |    |        |        |        |      |      |



|        |      |    |     |    |        |        |        |      |      |
|--------|------|----|-----|----|--------|--------|--------|------|------|
| HETATM | 1708 | O1 | PRP | 48 | 30.377 | 22.610 | 55.469 | 1.00 | 0.00 |
| O      |      |    |     |    |        |        |        |      |      |
| HETATM | 1709 | H1 | PRP | 48 | 29.999 | 22.836 | 54.616 | 1.00 | 0.00 |
| H      |      |    |     |    |        |        |        |      |      |
| HETATM | 1710 | C1 | PRP | 48 | 31.798 | 22.563 | 55.469 | 1.00 | 0.00 |
| C      |      |    |     |    |        |        |        |      |      |
| HETATM | 1711 | H2 | PRP | 48 | 32.171 | 22.423 | 56.483 | 1.00 | 0.00 |
| H      |      |    |     |    |        |        |        |      |      |
| HETATM | 1712 | H3 | PRP | 48 | 32.245 | 21.795 | 54.837 | 1.00 | 0.00 |
| H      |      |    |     |    |        |        |        |      |      |
| HETATM | 1713 | C2 | PRP | 48 | 32.371 | 23.933 | 55.152 | 1.00 | 0.00 |
| C      |      |    |     |    |        |        |        |      |      |
| HETATM | 1714 | H4 | PRP | 48 | 33.460 | 23.953 | 55.183 | 1.00 | 0.00 |
| H      |      |    |     |    |        |        |        |      |      |
| HETATM | 1715 | O2 | PRP | 48 | 31.883 | 24.882 | 56.156 | 1.00 | 0.00 |
| O      |      |    |     |    |        |        |        |      |      |
| HETATM | 1716 | H5 | PRP | 48 | 30.951 | 24.655 | 56.197 | 1.00 | 0.00 |
| H      |      |    |     |    |        |        |        |      |      |
| HETATM | 1717 | C3 | PRP | 48 | 32.036 | 24.544 | 53.739 | 1.00 | 0.00 |
| C      |      |    |     |    |        |        |        |      |      |
| HETATM | 1718 | H6 | PRP | 48 | 32.605 | 24.032 | 52.963 | 1.00 | 0.00 |
| H      |      |    |     |    |        |        |        |      |      |
| HETATM | 1719 | H7 | PRP | 48 | 30.972 | 24.448 | 53.525 | 1.00 | 0.00 |
| H      |      |    |     |    |        |        |        |      |      |
| HETATM | 1720 | H8 | PRP | 48 | 32.324 | 25.595 | 53.760 | 1.00 | 0.00 |
| H      |      |    |     |    |        |        |        |      |      |
| HETATM | 1721 | O1 | PRP | 49 | 27.493 | 25.704 | 55.519 | 1.00 | 0.00 |
| O      |      |    |     |    |        |        |        |      |      |
| HETATM | 1722 | H1 | PRP | 49 | 27.984 | 25.607 | 56.338 | 1.00 | 0.00 |
| H      |      |    |     |    |        |        |        |      |      |
| HETATM | 1723 | C1 | PRP | 49 | 26.206 | 26.129 | 55.846 | 1.00 | 0.00 |
| C      |      |    |     |    |        |        |        |      |      |
| HETATM | 1724 | H2 | PRP | 49 | 25.836 | 25.497 | 56.653 | 1.00 | 0.00 |
| H      |      |    |     |    |        |        |        |      |      |
| HETATM | 1725 | H3 | PRP | 49 | 26.198 | 27.177 | 56.146 | 1.00 | 0.00 |
| H      |      |    |     |    |        |        |        |      |      |
| HETATM | 1726 | C2 | PRP | 49 | 25.171 | 25.922 | 54.739 | 1.00 | 0.00 |
| C      |      |    |     |    |        |        |        |      |      |
| HETATM | 1727 | H4 | PRP | 49 | 25.304 | 26.649 | 53.939 | 1.00 | 0.00 |
| H      |      |    |     |    |        |        |        |      |      |
| HETATM | 1728 | O2 | PRP | 49 | 23.850 | 25.990 | 55.223 | 1.00 | 0.00 |
| O      |      |    |     |    |        |        |        |      |      |
| HETATM | 1729 | H5 | PRP | 49 | 23.338 | 26.298 | 54.472 | 1.00 | 0.00 |
| H      |      |    |     |    |        |        |        |      |      |
| HETATM | 1730 | C3 | PRP | 49 | 25.360 | 24.552 | 54.030 | 1.00 | 0.00 |
| C      |      |    |     |    |        |        |        |      |      |
| HETATM | 1731 | H6 | PRP | 49 | 26.019 | 24.564 | 53.162 | 1.00 | 0.00 |
| H      |      |    |     |    |        |        |        |      |      |
| HETATM | 1732 | H7 | PRP | 49 | 25.692 | 23.820 | 54.767 | 1.00 | 0.00 |
| H      |      |    |     |    |        |        |        |      |      |
| HETATM | 1733 | H8 | PRP | 49 | 24.393 | 24.248 | 53.630 | 1.00 | 0.00 |
| H      |      |    |     |    |        |        |        |      |      |
| HETATM | 1734 | O1 | PRP | 50 | 28.040 | 29.089 | 52.203 | 1.00 | 0.00 |
| O      |      |    |     |    |        |        |        |      |      |
| HETATM | 1735 | H1 | PRP | 50 | 27.787 | 29.760 | 51.564 | 1.00 | 0.00 |
| H      |      |    |     |    |        |        |        |      |      |

|        |      |    |     |    |        |        |        |      |      |
|--------|------|----|-----|----|--------|--------|--------|------|------|
| HETATM | 1736 | C1 | PRP | 50 | 29.180 | 28.495 | 51.724 | 1.00 | 0.00 |
| C      |      |    |     |    |        |        |        |      |      |
| HETATM | 1737 | H2 | PRP | 50 | 29.027 | 28.112 | 50.715 | 1.00 | 0.00 |
| H      |      |    |     |    |        |        |        |      |      |
| HETATM | 1738 | H3 | PRP | 50 | 29.877 | 29.330 | 51.648 | 1.00 | 0.00 |
| H      |      |    |     |    |        |        |        |      |      |
| HETATM | 1739 | C2 | PRP | 50 | 29.922 | 27.482 | 52.667 | 1.00 | 0.00 |
| C      |      |    |     |    |        |        |        |      |      |
| HETATM | 1740 | H4 | PRP | 50 | 30.913 | 27.301 | 52.250 | 1.00 | 0.00 |
| H      |      |    |     |    |        |        |        |      |      |
| HETATM | 1741 | O2 | PRP | 50 | 29.330 | 26.239 | 52.809 | 1.00 | 0.00 |
| O      |      |    |     |    |        |        |        |      |      |
| HETATM | 1742 | H5 | PRP | 50 | 28.541 | 26.486 | 53.298 | 1.00 | 0.00 |
| H      |      |    |     |    |        |        |        |      |      |
| HETATM | 1743 | C3 | PRP | 50 | 30.059 | 28.087 | 54.090 | 1.00 | 0.00 |
| C      |      |    |     |    |        |        |        |      |      |
| HETATM | 1744 | H6 | PRP | 50 | 30.217 | 27.243 | 54.761 | 1.00 | 0.00 |
| H      |      |    |     |    |        |        |        |      |      |
| HETATM | 1745 | H7 | PRP | 50 | 30.953 | 28.706 | 54.163 | 1.00 | 0.00 |
| H      |      |    |     |    |        |        |        |      |      |
| HETATM | 1746 | H8 | PRP | 50 | 29.236 | 28.715 | 54.434 | 1.00 | 0.00 |
| H      |      |    |     |    |        |        |        |      |      |
| HETATM | 1747 | O1 | PRP | 51 | 16.366 | 29.447 | 48.380 | 1.00 | 0.00 |
| O      |      |    |     |    |        |        |        |      |      |
| HETATM | 1748 | H1 | PRP | 51 | 16.172 | 30.354 | 48.630 | 1.00 | 0.00 |
| H      |      |    |     |    |        |        |        |      |      |
| HETATM | 1749 | C1 | PRP | 51 | 17.142 | 29.495 | 47.229 | 1.00 | 0.00 |
| C      |      |    |     |    |        |        |        |      |      |
| HETATM | 1750 | H2 | PRP | 51 | 18.155 | 29.722 | 47.560 | 1.00 | 0.00 |
| H      |      |    |     |    |        |        |        |      |      |
| HETATM | 1751 | H3 | PRP | 51 | 17.052 | 28.479 | 46.846 | 1.00 | 0.00 |
| H      |      |    |     |    |        |        |        |      |      |
| HETATM | 1752 | C2 | PRP | 51 | 16.509 | 30.579 | 46.291 | 1.00 | 0.00 |
| C      |      |    |     |    |        |        |        |      |      |
| HETATM | 1753 | H4 | PRP | 51 | 16.323 | 31.522 | 46.804 | 1.00 | 0.00 |
| H      |      |    |     |    |        |        |        |      |      |
| HETATM | 1754 | O2 | PRP | 51 | 15.288 | 30.123 | 45.722 | 1.00 | 0.00 |
| O      |      |    |     |    |        |        |        |      |      |
| HETATM | 1755 | H5 | PRP | 51 | 14.719 | 29.894 | 46.460 | 1.00 | 0.00 |
| H      |      |    |     |    |        |        |        |      |      |
| HETATM | 1756 | C3 | PRP | 51 | 17.506 | 30.952 | 45.200 | 1.00 | 0.00 |
| C      |      |    |     |    |        |        |        |      |      |
| HETATM | 1757 | H6 | PRP | 51 | 17.119 | 31.748 | 44.563 | 1.00 | 0.00 |
| H      |      |    |     |    |        |        |        |      |      |
| HETATM | 1758 | H7 | PRP | 51 | 18.466 | 31.320 | 45.563 | 1.00 | 0.00 |
| H      |      |    |     |    |        |        |        |      |      |
| HETATM | 1759 | H8 | PRP | 51 | 17.792 | 30.127 | 44.547 | 1.00 | 0.00 |
| H      |      |    |     |    |        |        |        |      |      |
| HETATM | 1760 | O1 | PRP | 52 | 35.672 | 23.426 | 58.699 | 1.00 | 0.00 |
| O      |      |    |     |    |        |        |        |      |      |
| HETATM | 1761 | H1 | PRP | 52 | 35.903 | 22.813 | 57.998 | 1.00 | 0.00 |
| H      |      |    |     |    |        |        |        |      |      |
| HETATM | 1762 | C1 | PRP | 52 | 34.353 | 23.055 | 59.015 | 1.00 | 0.00 |
| C      |      |    |     |    |        |        |        |      |      |
| HETATM | 1763 | H2 | PRP | 52 | 33.904 | 23.909 | 59.522 | 1.00 | 0.00 |
| H      |      |    |     |    |        |        |        |      |      |

|        |      |    |     |    |        |        |        |      |      |
|--------|------|----|-----|----|--------|--------|--------|------|------|
| HETATM | 1764 | H3 | PRP | 52 | 33.788 | 22.634 | 58.184 | 1.00 | 0.00 |
| H      |      |    |     |    |        |        |        |      |      |
| HETATM | 1765 | C2 | PRP | 52 | 34.446 | 21.936 | 60.077 | 1.00 | 0.00 |
| C      |      |    |     |    |        |        |        |      |      |
| HETATM | 1766 | H4 | PRP | 52 | 34.940 | 22.314 | 60.972 | 1.00 | 0.00 |
| H      |      |    |     |    |        |        |        |      |      |
| HETATM | 1767 | O2 | PRP | 52 | 35.121 | 20.793 | 59.504 | 1.00 | 0.00 |
| O      |      |    |     |    |        |        |        |      |      |
| HETATM | 1768 | H5 | PRP | 52 | 36.026 | 21.071 | 59.345 | 1.00 | 0.00 |
| H      |      |    |     |    |        |        |        |      |      |
| HETATM | 1769 | C3 | PRP | 52 | 33.097 | 21.548 | 60.714 | 1.00 | 0.00 |
| C      |      |    |     |    |        |        |        |      |      |
| HETATM | 1770 | H6 | PRP | 52 | 32.328 | 21.719 | 59.961 | 1.00 | 0.00 |
| H      |      |    |     |    |        |        |        |      |      |
| HETATM | 1771 | H7 | PRP | 52 | 33.201 | 20.494 | 60.974 | 1.00 | 0.00 |
| H      |      |    |     |    |        |        |        |      |      |
| HETATM | 1772 | H8 | PRP | 52 | 32.930 | 22.226 | 61.551 | 1.00 | 0.00 |
| H      |      |    |     |    |        |        |        |      |      |
| HETATM | 1773 | O1 | PRP | 53 | 21.130 | 27.502 | 64.986 | 1.00 | 0.00 |
| O      |      |    |     |    |        |        |        |      |      |
| HETATM | 1774 | H1 | PRP | 53 | 22.067 | 27.677 | 65.102 | 1.00 | 0.00 |
| H      |      |    |     |    |        |        |        |      |      |
| HETATM | 1775 | C1 | PRP | 53 | 20.866 | 28.178 | 63.781 | 1.00 | 0.00 |
| C      |      |    |     |    |        |        |        |      |      |
| HETATM | 1776 | H2 | PRP | 53 | 21.019 | 29.244 | 63.950 | 1.00 | 0.00 |
| H      |      |    |     |    |        |        |        |      |      |
| HETATM | 1777 | H3 | PRP | 53 | 21.569 | 27.821 | 63.028 | 1.00 | 0.00 |
| H      |      |    |     |    |        |        |        |      |      |
| HETATM | 1778 | C2 | PRP | 53 | 19.376 | 27.849 | 63.449 | 1.00 | 0.00 |
| C      |      |    |     |    |        |        |        |      |      |
| HETATM | 1779 | H4 | PRP | 53 | 18.788 | 28.448 | 64.144 | 1.00 | 0.00 |
| H      |      |    |     |    |        |        |        |      |      |
| HETATM | 1780 | O2 | PRP | 53 | 19.174 | 26.447 | 63.714 | 1.00 | 0.00 |
| O      |      |    |     |    |        |        |        |      |      |
| HETATM | 1781 | H5 | PRP | 53 | 19.616 | 26.416 | 64.565 | 1.00 | 0.00 |
| H      |      |    |     |    |        |        |        |      |      |
| HETATM | 1782 | C3 | PRP | 53 | 18.930 | 28.213 | 61.970 | 1.00 | 0.00 |
| C      |      |    |     |    |        |        |        |      |      |
| HETATM | 1783 | H6 | PRP | 53 | 19.726 | 28.656 | 61.371 | 1.00 | 0.00 |
| H      |      |    |     |    |        |        |        |      |      |
| HETATM | 1784 | H7 | PRP | 53 | 18.591 | 27.328 | 61.432 | 1.00 | 0.00 |
| H      |      |    |     |    |        |        |        |      |      |
| HETATM | 1785 | H8 | PRP | 53 | 18.065 | 28.870 | 62.052 | 1.00 | 0.00 |
| H      |      |    |     |    |        |        |        |      |      |
| HETATM | 1786 | O1 | PRP | 54 | 31.815 | 25.737 | 49.053 | 1.00 | 0.00 |
| O      |      |    |     |    |        |        |        |      |      |
| HETATM | 1787 | H1 | PRP | 54 | 31.444 | 25.142 | 49.709 | 1.00 | 0.00 |
| H      |      |    |     |    |        |        |        |      |      |
| HETATM | 1788 | C1 | PRP | 54 | 30.940 | 25.746 | 47.985 | 1.00 | 0.00 |
| C      |      |    |     |    |        |        |        |      |      |
| HETATM | 1789 | H2 | PRP | 54 | 30.678 | 24.737 | 47.668 | 1.00 | 0.00 |
| H      |      |    |     |    |        |        |        |      |      |
| HETATM | 1790 | H3 | PRP | 54 | 30.061 | 26.238 | 48.401 | 1.00 | 0.00 |
| H      |      |    |     |    |        |        |        |      |      |
| HETATM | 1791 | C2 | PRP | 54 | 31.467 | 26.512 | 46.689 | 1.00 | 0.00 |
| C      |      |    |     |    |        |        |        |      |      |

|        |      |    |     |    |        |        |        |      |      |
|--------|------|----|-----|----|--------|--------|--------|------|------|
| HETATM | 1792 | H4 | PRP | 54 | 32.434 | 26.072 | 46.446 | 1.00 | 0.00 |
| H      |      |    |     |    |        |        |        |      |      |
| HETATM | 1793 | O2 | PRP | 54 | 31.725 | 27.888 | 46.893 | 1.00 | 0.00 |
| O      |      |    |     |    |        |        |        |      |      |
| HETATM | 1794 | H5 | PRP | 54 | 32.248 | 27.828 | 47.696 | 1.00 | 0.00 |
| H      |      |    |     |    |        |        |        |      |      |
| HETATM | 1795 | C3 | PRP | 54 | 30.387 | 26.372 | 45.580 | 1.00 | 0.00 |
| C      |      |    |     |    |        |        |        |      |      |
| HETATM | 1796 | H6 | PRP | 54 | 30.743 | 26.532 | 44.563 | 1.00 | 0.00 |
| H      |      |    |     |    |        |        |        |      |      |
| HETATM | 1797 | H7 | PRP | 54 | 29.985 | 25.359 | 45.616 | 1.00 | 0.00 |
| H      |      |    |     |    |        |        |        |      |      |
| HETATM | 1798 | H8 | PRP | 54 | 29.559 | 27.004 | 45.900 | 1.00 | 0.00 |
| H      |      |    |     |    |        |        |        |      |      |
| HETATM | 1799 | O1 | PRP | 55 | 41.562 | 19.715 | 39.384 | 1.00 | 0.00 |
| O      |      |    |     |    |        |        |        |      |      |
| HETATM | 1800 | H1 | PRP | 55 | 42.424 | 19.430 | 39.071 | 1.00 | 0.00 |
| H      |      |    |     |    |        |        |        |      |      |
| HETATM | 1801 | C1 | PRP | 55 | 41.258 | 19.144 | 40.607 | 1.00 | 0.00 |
| C      |      |    |     |    |        |        |        |      |      |
| HETATM | 1802 | H2 | PRP | 55 | 40.265 | 19.492 | 40.890 | 1.00 | 0.00 |
| H      |      |    |     |    |        |        |        |      |      |
| HETATM | 1803 | H3 | PRP | 55 | 41.343 | 18.057 | 40.584 | 1.00 | 0.00 |
| H      |      |    |     |    |        |        |        |      |      |
| HETATM | 1804 | C2 | PRP | 55 | 42.068 | 19.838 | 41.643 | 1.00 | 0.00 |
| C      |      |    |     |    |        |        |        |      |      |
| HETATM | 1805 | H4 | PRP | 55 | 41.816 | 20.898 | 41.655 | 1.00 | 0.00 |
| H      |      |    |     |    |        |        |        |      |      |
| HETATM | 1806 | O2 | PRP | 55 | 43.407 | 19.503 | 41.449 | 1.00 | 0.00 |
| O      |      |    |     |    |        |        |        |      |      |
| HETATM | 1807 | H5 | PRP | 55 | 43.637 | 20.112 | 40.744 | 1.00 | 0.00 |
| H      |      |    |     |    |        |        |        |      |      |
| HETATM | 1808 | C3 | PRP | 55 | 41.606 | 19.343 | 43.063 | 1.00 | 0.00 |
| C      |      |    |     |    |        |        |        |      |      |
| HETATM | 1809 | H6 | PRP | 55 | 40.676 | 19.863 | 43.293 | 1.00 | 0.00 |
| H      |      |    |     |    |        |        |        |      |      |
| HETATM | 1810 | H7 | PRP | 55 | 41.465 | 18.273 | 43.213 | 1.00 | 0.00 |
| H      |      |    |     |    |        |        |        |      |      |
| HETATM | 1811 | H8 | PRP | 55 | 42.369 | 19.595 | 43.799 | 1.00 | 0.00 |
| H      |      |    |     |    |        |        |        |      |      |
| HETATM | 1812 | O1 | PRP | 56 | 24.948 | 6.210  | 48.541 | 1.00 | 0.00 |
| O      |      |    |     |    |        |        |        |      |      |
| HETATM | 1813 | H1 | PRP | 56 | 25.502 | 5.604  | 48.044 | 1.00 | 0.00 |
| H      |      |    |     |    |        |        |        |      |      |
| HETATM | 1814 | C1 | PRP | 56 | 24.582 | 5.665  | 49.779 | 1.00 | 0.00 |
| C      |      |    |     |    |        |        |        |      |      |
| HETATM | 1815 | H2 | PRP | 56 | 23.532 | 5.380  | 49.701 | 1.00 | 0.00 |
| H      |      |    |     |    |        |        |        |      |      |
| HETATM | 1816 | H3 | PRP | 56 | 25.214 | 4.785  | 49.895 | 1.00 | 0.00 |
| H      |      |    |     |    |        |        |        |      |      |
| HETATM | 1817 | C2 | PRP | 56 | 24.632 | 6.442  | 51.099 | 1.00 | 0.00 |
| C      |      |    |     |    |        |        |        |      |      |
| HETATM | 1818 | H4 | PRP | 56 | 24.084 | 7.372  | 50.951 | 1.00 | 0.00 |
| H      |      |    |     |    |        |        |        |      |      |
| HETATM | 1819 | O2 | PRP | 56 | 25.878 | 6.796  | 51.474 | 1.00 | 0.00 |
| O      |      |    |     |    |        |        |        |      |      |

|        |      |    |     |    |        |        |        |      |      |
|--------|------|----|-----|----|--------|--------|--------|------|------|
| HETATM | 1820 | H5 | PRP | 56 | 26.304 | 7.407  | 50.869 | 1.00 | 0.00 |
| H      |      |    |     |    |        |        |        |      |      |
| HETATM | 1821 | C3 | PRP | 56 | 23.891 | 5.661  | 52.285 | 1.00 | 0.00 |
| C      |      |    |     |    |        |        |        |      |      |
| HETATM | 1822 | H6 | PRP | 56 | 22.828 | 5.740  | 52.059 | 1.00 | 0.00 |
| H      |      |    |     |    |        |        |        |      |      |
| HETATM | 1823 | H7 | PRP | 56 | 24.115 | 4.594  | 52.309 | 1.00 | 0.00 |
| H      |      |    |     |    |        |        |        |      |      |
| HETATM | 1824 | H8 | PRP | 56 | 24.114 | 6.153  | 53.231 | 1.00 | 0.00 |
| H      |      |    |     |    |        |        |        |      |      |
| HETATM | 1825 | O1 | PRP | 57 | 39.437 | 10.640 | 50.552 | 1.00 | 0.00 |
| O      |      |    |     |    |        |        |        |      |      |
| HETATM | 1826 | H1 | PRP | 57 | 38.780 | 10.140 | 51.042 | 1.00 | 0.00 |
| H      |      |    |     |    |        |        |        |      |      |
| HETATM | 1827 | C1 | PRP | 57 | 40.243 | 11.073 | 51.590 | 1.00 | 0.00 |
| C      |      |    |     |    |        |        |        |      |      |
| HETATM | 1828 | H2 | PRP | 57 | 39.777 | 11.894 | 52.136 | 1.00 | 0.00 |
| H      |      |    |     |    |        |        |        |      |      |
| HETATM | 1829 | H3 | PRP | 57 | 40.351 | 10.228 | 52.270 | 1.00 | 0.00 |
| H      |      |    |     |    |        |        |        |      |      |
| HETATM | 1830 | C2 | PRP | 57 | 41.559 | 11.499 | 50.896 | 1.00 | 0.00 |
| C      |      |    |     |    |        |        |        |      |      |
| HETATM | 1831 | H4 | PRP | 57 | 41.456 | 11.424 | 49.814 | 1.00 | 0.00 |
| H      |      |    |     |    |        |        |        |      |      |
| HETATM | 1832 | O2 | PRP | 57 | 42.646 | 10.696 | 51.292 | 1.00 | 0.00 |
| O      |      |    |     |    |        |        |        |      |      |
| HETATM | 1833 | H5 | PRP | 57 | 42.315 | 9.871  | 51.653 | 1.00 | 0.00 |
| H      |      |    |     |    |        |        |        |      |      |
| HETATM | 1834 | C3 | PRP | 57 | 41.866 | 12.905 | 51.301 | 1.00 | 0.00 |
| C      |      |    |     |    |        |        |        |      |      |
| HETATM | 1835 | H6 | PRP | 57 | 41.039 | 13.556 | 51.018 | 1.00 | 0.00 |
| H      |      |    |     |    |        |        |        |      |      |
| HETATM | 1836 | H7 | PRP | 57 | 42.001 | 12.896 | 52.382 | 1.00 | 0.00 |
| H      |      |    |     |    |        |        |        |      |      |
| HETATM | 1837 | H8 | PRP | 57 | 42.741 | 13.264 | 50.760 | 1.00 | 0.00 |
| H      |      |    |     |    |        |        |        |      |      |
| HETATM | 1838 | O1 | PRP | 58 | 45.357 | 13.917 | 39.516 | 1.00 | 0.00 |
| O      |      |    |     |    |        |        |        |      |      |
| HETATM | 1839 | H1 | PRP | 58 | 45.171 | 12.988 | 39.668 | 1.00 | 0.00 |
| H      |      |    |     |    |        |        |        |      |      |
| HETATM | 1840 | C1 | PRP | 58 | 45.326 | 14.328 | 38.189 | 1.00 | 0.00 |
| C      |      |    |     |    |        |        |        |      |      |
| HETATM | 1841 | H2 | PRP | 58 | 45.238 | 15.414 | 38.231 | 1.00 | 0.00 |
| H      |      |    |     |    |        |        |        |      |      |
| HETATM | 1842 | H3 | PRP | 58 | 46.302 | 14.013 | 37.822 | 1.00 | 0.00 |
| H      |      |    |     |    |        |        |        |      |      |
| HETATM | 1843 | C2 | PRP | 58 | 44.187 | 13.739 | 37.398 | 1.00 | 0.00 |
| C      |      |    |     |    |        |        |        |      |      |
| HETATM | 1844 | H4 | PRP | 58 | 43.292 | 13.620 | 38.008 | 1.00 | 0.00 |
| H      |      |    |     |    |        |        |        |      |      |
| HETATM | 1845 | O2 | PRP | 58 | 44.524 | 12.365 | 36.901 | 1.00 | 0.00 |
| O      |      |    |     |    |        |        |        |      |      |
| HETATM | 1846 | H5 | PRP | 58 | 44.023 | 12.197 | 36.100 | 1.00 | 0.00 |
| H      |      |    |     |    |        |        |        |      |      |
| HETATM | 1847 | C3 | PRP | 58 | 43.877 | 14.642 | 36.142 | 1.00 | 0.00 |
| C      |      |    |     |    |        |        |        |      |      |

|        |      |    |     |    |        |        |        |      |      |
|--------|------|----|-----|----|--------|--------|--------|------|------|
| HETATM | 1848 | H6 | PRP | 58 | 43.910 | 15.715 | 36.330 | 1.00 | 0.00 |
| H      |      |    |     |    |        |        |        |      |      |
| HETATM | 1849 | H7 | PRP | 58 | 44.565 | 14.417 | 35.327 | 1.00 | 0.00 |
| H      |      |    |     |    |        |        |        |      |      |
| HETATM | 1850 | H8 | PRP | 58 | 42.852 | 14.496 | 35.798 | 1.00 | 0.00 |
| H      |      |    |     |    |        |        |        |      |      |
| HETATM | 1851 | O1 | PRP | 59 | 32.575 | 15.452 | 51.368 | 1.00 | 0.00 |
| O      |      |    |     |    |        |        |        |      |      |
| HETATM | 1852 | H1 | PRP | 59 | 33.436 | 15.553 | 50.956 | 1.00 | 0.00 |
| H      |      |    |     |    |        |        |        |      |      |
| HETATM | 1853 | C1 | PRP | 59 | 31.573 | 15.161 | 50.390 | 1.00 | 0.00 |
| C      |      |    |     |    |        |        |        |      |      |
| HETATM | 1854 | H2 | PRP | 59 | 31.500 | 14.075 | 50.341 | 1.00 | 0.00 |
| H      |      |    |     |    |        |        |        |      |      |
| HETATM | 1855 | H3 | PRP | 59 | 30.634 | 15.620 | 50.699 | 1.00 | 0.00 |
| H      |      |    |     |    |        |        |        |      |      |
| HETATM | 1856 | C2 | PRP | 59 | 32.160 | 15.547 | 48.919 | 1.00 | 0.00 |
| C      |      |    |     |    |        |        |        |      |      |
| HETATM | 1857 | H4 | PRP | 59 | 31.369 | 15.343 | 48.197 | 1.00 | 0.00 |
| H      |      |    |     |    |        |        |        |      |      |
| HETATM | 1858 | O2 | PRP | 59 | 33.235 | 14.738 | 48.669 | 1.00 | 0.00 |
| O      |      |    |     |    |        |        |        |      |      |
| HETATM | 1859 | H5 | PRP | 59 | 33.022 | 13.830 | 48.898 | 1.00 | 0.00 |
| H      |      |    |     |    |        |        |        |      |      |
| HETATM | 1860 | C3 | PRP | 59 | 32.665 | 17.002 | 48.919 | 1.00 | 0.00 |
| C      |      |    |     |    |        |        |        |      |      |
| HETATM | 1861 | H6 | PRP | 59 | 31.885 | 17.603 | 49.387 | 1.00 | 0.00 |
| H      |      |    |     |    |        |        |        |      |      |
| HETATM | 1862 | H7 | PRP | 59 | 33.550 | 17.025 | 49.555 | 1.00 | 0.00 |
| H      |      |    |     |    |        |        |        |      |      |
| HETATM | 1863 | H8 | PRP | 59 | 32.907 | 17.348 | 47.914 | 1.00 | 0.00 |
| H      |      |    |     |    |        |        |        |      |      |
| HETATM | 1864 | O1 | PRP | 60 | 36.830 | 28.261 | 42.901 | 1.00 | 0.00 |
| O      |      |    |     |    |        |        |        |      |      |
| HETATM | 1865 | H1 | PRP | 60 | 36.566 | 28.037 | 42.006 | 1.00 | 0.00 |
| H      |      |    |     |    |        |        |        |      |      |
| HETATM | 1866 | C1 | PRP | 60 | 35.968 | 27.648 | 43.873 | 1.00 | 0.00 |
| C      |      |    |     |    |        |        |        |      |      |
| HETATM | 1867 | H2 | PRP | 60 | 34.944 | 28.010 | 43.772 | 1.00 | 0.00 |
| H      |      |    |     |    |        |        |        |      |      |
| HETATM | 1868 | H3 | PRP | 60 | 35.990 | 26.565 | 43.754 | 1.00 | 0.00 |
| H      |      |    |     |    |        |        |        |      |      |
| HETATM | 1869 | C2 | PRP | 60 | 36.325 | 28.016 | 45.358 | 1.00 | 0.00 |
| C      |      |    |     |    |        |        |        |      |      |
| HETATM | 1870 | H4 | PRP | 60 | 36.640 | 29.059 | 45.317 | 1.00 | 0.00 |
| H      |      |    |     |    |        |        |        |      |      |
| HETATM | 1871 | O2 | PRP | 60 | 37.417 | 27.171 | 45.766 | 1.00 | 0.00 |
| O      |      |    |     |    |        |        |        |      |      |
| HETATM | 1872 | H5 | PRP | 60 | 37.355 | 26.444 | 45.142 | 1.00 | 0.00 |
| H      |      |    |     |    |        |        |        |      |      |
| HETATM | 1873 | C3 | PRP | 60 | 35.224 | 27.842 | 46.388 | 1.00 | 0.00 |
| C      |      |    |     |    |        |        |        |      |      |
| HETATM | 1874 | H6 | PRP | 60 | 34.528 | 27.070 | 46.059 | 1.00 | 0.00 |
| H      |      |    |     |    |        |        |        |      |      |
| HETATM | 1875 | H7 | PRP | 60 | 35.569 | 27.720 | 47.415 | 1.00 | 0.00 |
| H      |      |    |     |    |        |        |        |      |      |

|        |      |    |     |    |        |        |        |      |      |
|--------|------|----|-----|----|--------|--------|--------|------|------|
| HETATM | 1876 | H8 | PRP | 60 | 34.595 | 28.728 | 46.298 | 1.00 | 0.00 |
| H      |      |    |     |    |        |        |        |      |      |
| HETATM | 1877 | O1 | PRP | 61 | 40.247 | 31.095 | 55.878 | 1.00 | 0.00 |
| O      |      |    |     |    |        |        |        |      |      |
| HETATM | 1878 | H1 | PRP | 61 | 39.825 | 31.241 | 55.028 | 1.00 | 0.00 |
| H      |      |    |     |    |        |        |        |      |      |
| HETATM | 1879 | C1 | PRP | 61 | 40.694 | 32.371 | 56.294 | 1.00 | 0.00 |
| C      |      |    |     |    |        |        |        |      |      |
| HETATM | 1880 | H2 | PRP | 61 | 40.693 | 32.488 | 57.378 | 1.00 | 0.00 |
| H      |      |    |     |    |        |        |        |      |      |
| HETATM | 1881 | H3 | PRP | 61 | 41.656 | 32.571 | 55.824 | 1.00 | 0.00 |
| H      |      |    |     |    |        |        |        |      |      |
| HETATM | 1882 | C2 | PRP | 61 | 39.793 | 33.411 | 55.677 | 1.00 | 0.00 |
| C      |      |    |     |    |        |        |        |      |      |
| HETATM | 1883 | H4 | PRP | 61 | 38.836 | 33.437 | 56.198 | 1.00 | 0.00 |
| H      |      |    |     |    |        |        |        |      |      |
| HETATM | 1884 | O2 | PRP | 61 | 39.566 | 33.316 | 54.288 | 1.00 | 0.00 |
| O      |      |    |     |    |        |        |        |      |      |
| HETATM | 1885 | H5 | PRP | 61 | 38.687 | 33.005 | 54.058 | 1.00 | 0.00 |
| H      |      |    |     |    |        |        |        |      |      |
| HETATM | 1886 | C3 | PRP | 61 | 40.373 | 34.813 | 55.882 | 1.00 | 0.00 |
| C      |      |    |     |    |        |        |        |      |      |
| HETATM | 1887 | H6 | PRP | 61 | 40.277 | 35.082 | 56.934 | 1.00 | 0.00 |
| H      |      |    |     |    |        |        |        |      |      |
| HETATM | 1888 | H7 | PRP | 61 | 41.407 | 34.908 | 55.551 | 1.00 | 0.00 |
| H      |      |    |     |    |        |        |        |      |      |
| HETATM | 1889 | H8 | PRP | 61 | 39.718 | 35.486 | 55.329 | 1.00 | 0.00 |
| H      |      |    |     |    |        |        |        |      |      |
| HETATM | 1890 | O1 | PRP | 62 | 28.589 | 13.162 | 47.475 | 1.00 | 0.00 |
| O      |      |    |     |    |        |        |        |      |      |
| HETATM | 1891 | H1 | PRP | 62 | 28.638 | 14.117 | 47.567 | 1.00 | 0.00 |
| H      |      |    |     |    |        |        |        |      |      |
| HETATM | 1892 | C1 | PRP | 62 | 29.782 | 12.668 | 46.869 | 1.00 | 0.00 |
| C      |      |    |     |    |        |        |        |      |      |
| HETATM | 1893 | H2 | PRP | 62 | 30.705 | 12.915 | 47.394 | 1.00 | 0.00 |
| H      |      |    |     |    |        |        |        |      |      |
| HETATM | 1894 | H3 | PRP | 62 | 29.734 | 11.579 | 46.893 | 1.00 | 0.00 |
| H      |      |    |     |    |        |        |        |      |      |
| HETATM | 1895 | C2 | PRP | 62 | 29.954 | 13.267 | 45.436 | 1.00 | 0.00 |
| C      |      |    |     |    |        |        |        |      |      |
| HETATM | 1896 | H4 | PRP | 62 | 29.983 | 14.356 | 45.398 | 1.00 | 0.00 |
| H      |      |    |     |    |        |        |        |      |      |
| HETATM | 1897 | O2 | PRP | 62 | 28.860 | 12.785 | 44.676 | 1.00 | 0.00 |
| O      |      |    |     |    |        |        |        |      |      |
| HETATM | 1898 | H5 | PRP | 62 | 28.111 | 12.878 | 45.270 | 1.00 | 0.00 |
| H      |      |    |     |    |        |        |        |      |      |
| HETATM | 1899 | C3 | PRP | 62 | 31.319 | 12.722 | 44.980 | 1.00 | 0.00 |
| C      |      |    |     |    |        |        |        |      |      |
| HETATM | 1900 | H6 | PRP | 62 | 31.291 | 11.648 | 45.166 | 1.00 | 0.00 |
| H      |      |    |     |    |        |        |        |      |      |
| HETATM | 1901 | H7 | PRP | 62 | 31.454 | 13.035 | 43.945 | 1.00 | 0.00 |
| H      |      |    |     |    |        |        |        |      |      |
| HETATM | 1902 | H8 | PRP | 62 | 32.099 | 13.150 | 45.609 | 1.00 | 0.00 |
| H      |      |    |     |    |        |        |        |      |      |
| HETATM | 1903 | O1 | PRP | 63 | 38.570 | 17.818 | 58.572 | 1.00 | 0.00 |
| O      |      |    |     |    |        |        |        |      |      |

|        |      |    |     |    |        |        |        |      |      |
|--------|------|----|-----|----|--------|--------|--------|------|------|
| HETATM | 1904 | H1 | PRP | 63 | 39.015 | 18.495 | 59.087 | 1.00 | 0.00 |
| H      |      |    |     |    |        |        |        |      |      |
| HETATM | 1905 | C1 | PRP | 63 | 38.982 | 16.673 | 59.177 | 1.00 | 0.00 |
| C      |      |    |     |    |        |        |        |      |      |
| HETATM | 1906 | H2 | PRP | 63 | 38.496 | 15.766 | 58.817 | 1.00 | 0.00 |
| H      |      |    |     |    |        |        |        |      |      |
| HETATM | 1907 | H3 | PRP | 63 | 40.041 | 16.647 | 58.917 | 1.00 | 0.00 |
| H      |      |    |     |    |        |        |        |      |      |
| HETATM | 1908 | C2 | PRP | 63 | 38.806 | 16.835 | 60.678 | 1.00 | 0.00 |
| C      |      |    |     |    |        |        |        |      |      |
| HETATM | 1909 | H4 | PRP | 63 | 37.729 | 16.984 | 60.755 | 1.00 | 0.00 |
| H      |      |    |     |    |        |        |        |      |      |
| HETATM | 1910 | O2 | PRP | 63 | 39.505 | 17.983 | 61.175 | 1.00 | 0.00 |
| O      |      |    |     |    |        |        |        |      |      |
| HETATM | 1911 | H5 | PRP | 63 | 39.717 | 17.914 | 62.108 | 1.00 | 0.00 |
| H      |      |    |     |    |        |        |        |      |      |
| HETATM | 1912 | C3 | PRP | 63 | 39.168 | 15.549 | 61.480 | 1.00 | 0.00 |
| C      |      |    |     |    |        |        |        |      |      |
| HETATM | 1913 | H6 | PRP | 63 | 40.226 | 15.313 | 61.361 | 1.00 | 0.00 |
| H      |      |    |     |    |        |        |        |      |      |
| HETATM | 1914 | H7 | PRP | 63 | 38.845 | 15.674 | 62.514 | 1.00 | 0.00 |
| H      |      |    |     |    |        |        |        |      |      |
| HETATM | 1915 | H8 | PRP | 63 | 38.524 | 14.755 | 61.102 | 1.00 | 0.00 |
| H      |      |    |     |    |        |        |        |      |      |
| HETATM | 1916 | O1 | PRP | 64 | 28.667 | 2.875  | 36.528 | 1.00 | 0.00 |
| O      |      |    |     |    |        |        |        |      |      |
| HETATM | 1917 | H1 | PRP | 64 | 28.012 | 3.477  | 36.168 | 1.00 | 0.00 |
| H      |      |    |     |    |        |        |        |      |      |
| HETATM | 1918 | C1 | PRP | 64 | 28.469 | 1.532  | 36.189 | 1.00 | 0.00 |
| C      |      |    |     |    |        |        |        |      |      |
| HETATM | 1919 | H2 | PRP | 64 | 28.589 | 1.597  | 35.108 | 1.00 | 0.00 |
| H      |      |    |     |    |        |        |        |      |      |
| HETATM | 1920 | H3 | PRP | 64 | 29.247 | 0.888  | 36.601 | 1.00 | 0.00 |
| H      |      |    |     |    |        |        |        |      |      |
| HETATM | 1921 | C2 | PRP | 64 | 27.137 | 0.812  | 36.504 | 1.00 | 0.00 |
| C      |      |    |     |    |        |        |        |      |      |
| HETATM | 1922 | H4 | PRP | 64 | 27.184 | -0.195 | 36.090 | 1.00 | 0.00 |
| H      |      |    |     |    |        |        |        |      |      |
| HETATM | 1923 | O2 | PRP | 64 | 26.050 | 1.479  | 35.928 | 1.00 | 0.00 |
| O      |      |    |     |    |        |        |        |      |      |
| HETATM | 1924 | H5 | PRP | 64 | 26.405 | 2.089  | 35.278 | 1.00 | 0.00 |
| H      |      |    |     |    |        |        |        |      |      |
| HETATM | 1925 | C3 | PRP | 64 | 26.807 | 0.650  | 38.029 | 1.00 | 0.00 |
| C      |      |    |     |    |        |        |        |      |      |
| HETATM | 1926 | H6 | PRP | 64 | 26.900 | 1.625  | 38.506 | 1.00 | 0.00 |
| H      |      |    |     |    |        |        |        |      |      |
| HETATM | 1927 | H7 | PRP | 64 | 25.852 | 0.159  | 38.219 | 1.00 | 0.00 |
| H      |      |    |     |    |        |        |        |      |      |
| HETATM | 1928 | H8 | PRP | 64 | 27.616 | 0.055  | 38.452 | 1.00 | 0.00 |
| H      |      |    |     |    |        |        |        |      |      |
| HETATM | 1929 | O1 | PRP | 65 | 29.112 | 36.926 | 47.608 | 1.00 | 0.00 |
| O      |      |    |     |    |        |        |        |      |      |
| HETATM | 1930 | H1 | PRP | 65 | 29.178 | 37.837 | 47.314 | 1.00 | 0.00 |
| H      |      |    |     |    |        |        |        |      |      |
| HETATM | 1931 | C1 | PRP | 65 | 28.317 | 36.906 | 48.725 | 1.00 | 0.00 |
| C      |      |    |     |    |        |        |        |      |      |



|        |      |    |     |    |        |        |        |      |      |
|--------|------|----|-----|----|--------|--------|--------|------|------|
| HETATM | 1932 | H2 | PRP | 65 | 28.892 | 36.677 | 49.621 | 1.00 | 0.00 |
| H      |      |    |     |    |        |        |        |      |      |
| HETATM | 1933 | H3 | PRP | 65 | 27.884 | 37.867 | 49.001 | 1.00 | 0.00 |
| H      |      |    |     |    |        |        |        |      |      |
| HETATM | 1934 | C2 | PRP | 65 | 27.215 | 35.889 | 48.565 | 1.00 | 0.00 |
| C      |      |    |     |    |        |        |        |      |      |
| HETATM | 1935 | H4 | PRP | 65 | 27.750 | 34.958 | 48.380 | 1.00 | 0.00 |
| H      |      |    |     |    |        |        |        |      |      |
| HETATM | 1936 | O2 | PRP | 65 | 26.394 | 36.219 | 47.402 | 1.00 | 0.00 |
| O      |      |    |     |    |        |        |        |      |      |
| HETATM | 1937 | H5 | PRP | 65 | 27.065 | 36.408 | 46.742 | 1.00 | 0.00 |
| H      |      |    |     |    |        |        |        |      |      |
| HETATM | 1938 | C3 | PRP | 65 | 26.402 | 35.805 | 49.859 | 1.00 | 0.00 |
| C      |      |    |     |    |        |        |        |      |      |
| HETATM | 1939 | H6 | PRP | 65 | 27.045 | 35.927 | 50.731 | 1.00 | 0.00 |
| H      |      |    |     |    |        |        |        |      |      |
| HETATM | 1940 | H7 | PRP | 65 | 25.536 | 36.467 | 49.891 | 1.00 | 0.00 |
| H      |      |    |     |    |        |        |        |      |      |
| HETATM | 1941 | H8 | PRP | 65 | 25.990 | 34.803 | 49.973 | 1.00 | 0.00 |
| H      |      |    |     |    |        |        |        |      |      |
| HETATM | 1942 | O1 | PRP | 66 | 46.749 | 29.047 | 34.440 | 1.00 | 0.00 |
| O      |      |    |     |    |        |        |        |      |      |
| HETATM | 1943 | H1 | PRP | 66 | 46.206 | 29.312 | 35.186 | 1.00 | 0.00 |
| H      |      |    |     |    |        |        |        |      |      |
| HETATM | 1944 | C1 | PRP | 66 | 46.048 | 29.249 | 33.236 | 1.00 | 0.00 |
| C      |      |    |     |    |        |        |        |      |      |
| HETATM | 1945 | H2 | PRP | 66 | 45.018 | 28.922 | 33.094 | 1.00 | 0.00 |
| H      |      |    |     |    |        |        |        |      |      |
| HETATM | 1946 | H3 | PRP | 66 | 45.940 | 30.332 | 33.180 | 1.00 | 0.00 |
| H      |      |    |     |    |        |        |        |      |      |
| HETATM | 1947 | C2 | PRP | 66 | 46.779 | 28.824 | 32.001 | 1.00 | 0.00 |
| C      |      |    |     |    |        |        |        |      |      |
| HETATM | 1948 | H4 | PRP | 66 | 46.293 | 29.171 | 31.090 | 1.00 | 0.00 |
| H      |      |    |     |    |        |        |        |      |      |
| HETATM | 1949 | O2 | PRP | 66 | 46.721 | 27.378 | 32.071 | 1.00 | 0.00 |
| O      |      |    |     |    |        |        |        |      |      |
| HETATM | 1950 | H5 | PRP | 66 | 46.838 | 27.081 | 32.976 | 1.00 | 0.00 |
| H      |      |    |     |    |        |        |        |      |      |
| HETATM | 1951 | C3 | PRP | 66 | 48.155 | 29.433 | 31.813 | 1.00 | 0.00 |
| C      |      |    |     |    |        |        |        |      |      |
| HETATM | 1952 | H6 | PRP | 66 | 48.709 | 29.064 | 30.950 | 1.00 | 0.00 |
| H      |      |    |     |    |        |        |        |      |      |
| HETATM | 1953 | H7 | PRP | 66 | 47.959 | 30.491 | 31.640 | 1.00 | 0.00 |
| H      |      |    |     |    |        |        |        |      |      |
| HETATM | 1954 | H8 | PRP | 66 | 48.769 | 29.148 | 32.668 | 1.00 | 0.00 |
| H      |      |    |     |    |        |        |        |      |      |
| HETATM | 1955 | O1 | PRP | 67 | 42.748 | 33.841 | 29.098 | 1.00 | 0.00 |
| O      |      |    |     |    |        |        |        |      |      |
| HETATM | 1956 | H1 | PRP | 67 | 43.639 | 33.911 | 28.747 | 1.00 | 0.00 |
| H      |      |    |     |    |        |        |        |      |      |
| HETATM | 1957 | C1 | PRP | 67 | 42.860 | 33.298 | 30.407 | 1.00 | 0.00 |
| C      |      |    |     |    |        |        |        |      |      |
| HETATM | 1958 | H2 | PRP | 67 | 43.583 | 33.808 | 31.043 | 1.00 | 0.00 |
| H      |      |    |     |    |        |        |        |      |      |
| HETATM | 1959 | H3 | PRP | 67 | 41.929 | 33.325 | 30.973 | 1.00 | 0.00 |
| H      |      |    |     |    |        |        |        |      |      |

|        |      |    |     |    |        |        |        |      |      |
|--------|------|----|-----|----|--------|--------|--------|------|------|
| HETATM | 1960 | C2 | PRP | 67 | 43.284 | 31.851 | 30.291 | 1.00 | 0.00 |
| C      |      |    |     |    |        |        |        |      |      |
| HETATM | 1961 | H4 | PRP | 67 | 44.060 | 31.714 | 29.538 | 1.00 | 0.00 |
| H      |      |    |     |    |        |        |        |      |      |
| HETATM | 1962 | O2 | PRP | 67 | 42.190 | 31.122 | 29.796 | 1.00 | 0.00 |
| O      |      |    |     |    |        |        |        |      |      |
| HETATM | 1963 | H5 | PRP | 67 | 41.467 | 31.206 | 30.421 | 1.00 | 0.00 |
| H      |      |    |     |    |        |        |        |      |      |
| HETATM | 1964 | C3 | PRP | 67 | 43.669 | 31.254 | 31.632 | 1.00 | 0.00 |
| C      |      |    |     |    |        |        |        |      |      |
| HETATM | 1965 | H6 | PRP | 67 | 44.643 | 31.608 | 31.969 | 1.00 | 0.00 |
| H      |      |    |     |    |        |        |        |      |      |
| HETATM | 1966 | H7 | PRP | 67 | 42.928 | 31.617 | 32.343 | 1.00 | 0.00 |
| H      |      |    |     |    |        |        |        |      |      |
| HETATM | 1967 | H8 | PRP | 67 | 43.561 | 30.171 | 31.560 | 1.00 | 0.00 |
| H      |      |    |     |    |        |        |        |      |      |
| HETATM | 1968 | O1 | PRP | 68 | 44.789 | 3.761  | 50.328 | 1.00 | 0.00 |
| O      |      |    |     |    |        |        |        |      |      |
| HETATM | 1969 | H1 | PRP | 68 | 44.425 | 4.536  | 49.892 | 1.00 | 0.00 |
| H      |      |    |     |    |        |        |        |      |      |
| HETATM | 1970 | C1 | PRP | 68 | 46.087 | 3.558  | 49.793 | 1.00 | 0.00 |
| C      |      |    |     |    |        |        |        |      |      |
| HETATM | 1971 | H2 | PRP | 68 | 46.767 | 4.391  | 49.971 | 1.00 | 0.00 |
| H      |      |    |     |    |        |        |        |      |      |
| HETATM | 1972 | H3 | PRP | 68 | 46.465 | 2.614  | 50.184 | 1.00 | 0.00 |
| H      |      |    |     |    |        |        |        |      |      |
| HETATM | 1973 | C2 | PRP | 68 | 46.042 | 3.412  | 48.260 | 1.00 | 0.00 |
| C      |      |    |     |    |        |        |        |      |      |
| HETATM | 1974 | H4 | PRP | 68 | 47.012 | 3.258  | 47.788 | 1.00 | 0.00 |
| H      |      |    |     |    |        |        |        |      |      |
| HETATM | 1975 | O2 | PRP | 68 | 45.521 | 4.617  | 47.610 | 1.00 | 0.00 |
| O      |      |    |     |    |        |        |        |      |      |
| HETATM | 1976 | H5 | PRP | 68 | 45.612 | 4.499  | 46.662 | 1.00 | 0.00 |
| H      |      |    |     |    |        |        |        |      |      |
| HETATM | 1977 | C3 | PRP | 68 | 45.149 | 2.252  | 47.854 | 1.00 | 0.00 |
| C      |      |    |     |    |        |        |        |      |      |
| HETATM | 1978 | H6 | PRP | 68 | 44.943 | 2.099  | 46.794 | 1.00 | 0.00 |
| H      |      |    |     |    |        |        |        |      |      |
| HETATM | 1979 | H7 | PRP | 68 | 45.691 | 1.365  | 48.182 | 1.00 | 0.00 |
| H      |      |    |     |    |        |        |        |      |      |
| HETATM | 1980 | H8 | PRP | 68 | 44.207 | 2.172  | 48.396 | 1.00 | 0.00 |
| H      |      |    |     |    |        |        |        |      |      |
| HETATM | 1981 | O1 | PRP | 69 | 46.221 | 26.551 | 39.339 | 1.00 | 0.00 |
| O      |      |    |     |    |        |        |        |      |      |
| HETATM | 1982 | H1 | PRP | 69 | 46.333 | 26.442 | 40.286 | 1.00 | 0.00 |
| H      |      |    |     |    |        |        |        |      |      |
| HETATM | 1983 | C1 | PRP | 69 | 44.875 | 26.916 | 38.922 | 1.00 | 0.00 |
| C      |      |    |     |    |        |        |        |      |      |
| HETATM | 1984 | H2 | PRP | 69 | 44.197 | 26.106 | 39.191 | 1.00 | 0.00 |
| H      |      |    |     |    |        |        |        |      |      |
| HETATM | 1985 | H3 | PRP | 69 | 44.594 | 27.769 | 39.539 | 1.00 | 0.00 |
| H      |      |    |     |    |        |        |        |      |      |
| HETATM | 1986 | C2 | PRP | 69 | 44.729 | 27.276 | 37.402 | 1.00 | 0.00 |
| C      |      |    |     |    |        |        |        |      |      |
| HETATM | 1987 | H4 | PRP | 69 | 44.826 | 26.459 | 36.686 | 1.00 | 0.00 |
| H      |      |    |     |    |        |        |        |      |      |

|        |      |    |     |    |        |        |        |      |      |
|--------|------|----|-----|----|--------|--------|--------|------|------|
| HETATM | 1988 | O2 | PRP | 69 | 45.565 | 28.395 | 37.055 | 1.00 | 0.00 |
| O      |      |    |     |    |        |        |        |      |      |
| HETATM | 1989 | H5 | PRP | 69 | 46.166 | 28.518 | 37.794 | 1.00 | 0.00 |
| H      |      |    |     |    |        |        |        |      |      |
| HETATM | 1990 | C3 | PRP | 69 | 43.296 | 27.951 | 37.132 | 1.00 | 0.00 |
| C      |      |    |     |    |        |        |        |      |      |
| HETATM | 1991 | H6 | PRP | 69 | 43.129 | 28.828 | 37.758 | 1.00 | 0.00 |
| H      |      |    |     |    |        |        |        |      |      |
| HETATM | 1992 | H7 | PRP | 69 | 43.287 | 28.331 | 36.110 | 1.00 | 0.00 |
| H      |      |    |     |    |        |        |        |      |      |
| HETATM | 1993 | H8 | PRP | 69 | 42.564 | 27.157 | 37.281 | 1.00 | 0.00 |
| H      |      |    |     |    |        |        |        |      |      |
| HETATM | 1994 | O1 | PRP | 70 | 43.148 | 31.668 | 51.874 | 1.00 | 0.00 |
| O      |      |    |     |    |        |        |        |      |      |
| HETATM | 1995 | H1 | PRP | 70 | 42.713 | 30.815 | 51.940 | 1.00 | 0.00 |
| H      |      |    |     |    |        |        |        |      |      |
| HETATM | 1996 | C1 | PRP | 70 | 42.142 | 32.673 | 52.170 | 1.00 | 0.00 |
| C      |      |    |     |    |        |        |        |      |      |
| HETATM | 1997 | H2 | PRP | 70 | 41.295 | 32.183 | 52.650 | 1.00 | 0.00 |
| H      |      |    |     |    |        |        |        |      |      |
| HETATM | 1998 | H3 | PRP | 70 | 42.572 | 33.382 | 52.877 | 1.00 | 0.00 |
| H      |      |    |     |    |        |        |        |      |      |
| HETATM | 1999 | C2 | PRP | 70 | 41.692 | 33.350 | 50.862 | 1.00 | 0.00 |
| C      |      |    |     |    |        |        |        |      |      |
| HETATM | 2000 | H4 | PRP | 70 | 41.866 | 32.646 | 50.049 | 1.00 | 0.00 |
| H      |      |    |     |    |        |        |        |      |      |
| HETATM | 2001 | O2 | PRP | 70 | 42.532 | 34.440 | 50.769 | 1.00 | 0.00 |
| O      |      |    |     |    |        |        |        |      |      |
| HETATM | 2002 | H5 | PRP | 70 | 43.417 | 34.136 | 50.552 | 1.00 | 0.00 |
| H      |      |    |     |    |        |        |        |      |      |
| HETATM | 2003 | C3 | PRP | 70 | 40.286 | 33.895 | 50.969 | 1.00 | 0.00 |
| C      |      |    |     |    |        |        |        |      |      |
| HETATM | 2004 | H6 | PRP | 70 | 40.067 | 34.528 | 51.829 | 1.00 | 0.00 |
| H      |      |    |     |    |        |        |        |      |      |
| HETATM | 2005 | H7 | PRP | 70 | 40.151 | 34.544 | 50.103 | 1.00 | 0.00 |
| H      |      |    |     |    |        |        |        |      |      |
| HETATM | 2006 | H8 | PRP | 70 | 39.543 | 33.109 | 50.833 | 1.00 | 0.00 |
| H      |      |    |     |    |        |        |        |      |      |
| HETATM | 2007 | O1 | PRP | 71 | 39.786 | 27.089 | 50.578 | 1.00 | 0.00 |
| O      |      |    |     |    |        |        |        |      |      |
| HETATM | 2008 | H1 | PRP | 71 | 39.626 | 26.847 | 49.663 | 1.00 | 0.00 |
| H      |      |    |     |    |        |        |        |      |      |
| HETATM | 2009 | C1 | PRP | 71 | 40.862 | 27.986 | 50.638 | 1.00 | 0.00 |
| C      |      |    |     |    |        |        |        |      |      |
| HETATM | 2010 | H2 | PRP | 71 | 40.458 | 28.997 | 50.591 | 1.00 | 0.00 |
| H      |      |    |     |    |        |        |        |      |      |
| HETATM | 2011 | H3 | PRP | 71 | 41.557 | 27.831 | 51.463 | 1.00 | 0.00 |
| H      |      |    |     |    |        |        |        |      |      |
| HETATM | 2012 | C2 | PRP | 71 | 41.637 | 27.783 | 49.319 | 1.00 | 0.00 |
| C      |      |    |     |    |        |        |        |      |      |
| HETATM | 2013 | H4 | PRP | 71 | 41.016 | 27.924 | 48.434 | 1.00 | 0.00 |
| H      |      |    |     |    |        |        |        |      |      |
| HETATM | 2014 | O2 | PRP | 71 | 42.210 | 26.530 | 49.255 | 1.00 | 0.00 |
| O      |      |    |     |    |        |        |        |      |      |
| HETATM | 2015 | H5 | PRP | 71 | 41.535 | 25.873 | 49.071 | 1.00 | 0.00 |
| H      |      |    |     |    |        |        |        |      |      |

|        |      |    |     |    |        |        |        |      |      |
|--------|------|----|-----|----|--------|--------|--------|------|------|
| HETATM | 2016 | C3 | PRP | 71 | 42.741 | 28.801 | 49.143 | 1.00 | 0.00 |
| C      |      |    |     |    |        |        |        |      |      |
| HETATM | 2017 | H6 | PRP | 71 | 43.480 | 28.601 | 49.919 | 1.00 | 0.00 |
| H      |      |    |     |    |        |        |        |      |      |
| HETATM | 2018 | H7 | PRP | 71 | 43.291 | 28.670 | 48.210 | 1.00 | 0.00 |
| H      |      |    |     |    |        |        |        |      |      |
| HETATM | 2019 | H8 | PRP | 71 | 42.418 | 29.842 | 49.170 | 1.00 | 0.00 |
| H      |      |    |     |    |        |        |        |      |      |
| HETATM | 2020 | O1 | PRP | 72 | 45.539 | 25.140 | 52.004 | 1.00 | 0.00 |
| O      |      |    |     |    |        |        |        |      |      |
| HETATM | 2021 | H1 | PRP | 72 | 46.349 | 25.342 | 52.477 | 1.00 | 0.00 |
| H      |      |    |     |    |        |        |        |      |      |
| HETATM | 2022 | C1 | PRP | 72 | 45.806 | 25.383 | 50.640 | 1.00 | 0.00 |
| C      |      |    |     |    |        |        |        |      |      |
| HETATM | 2023 | H2 | PRP | 72 | 45.062 | 26.132 | 50.368 | 1.00 | 0.00 |
| H      |      |    |     |    |        |        |        |      |      |
| HETATM | 2024 | H3 | PRP | 72 | 46.803 | 25.803 | 50.511 | 1.00 | 0.00 |
| H      |      |    |     |    |        |        |        |      |      |
| HETATM | 2025 | C2 | PRP | 72 | 45.632 | 24.061 | 49.795 | 1.00 | 0.00 |
| C      |      |    |     |    |        |        |        |      |      |
| HETATM | 2026 | H4 | PRP | 72 | 44.799 | 23.568 | 50.295 | 1.00 | 0.00 |
| H      |      |    |     |    |        |        |        |      |      |
| HETATM | 2027 | O2 | PRP | 72 | 46.802 | 23.243 | 49.901 | 1.00 | 0.00 |
| O      |      |    |     |    |        |        |        |      |      |
| HETATM | 2028 | H5 | PRP | 72 | 46.774 | 22.792 | 50.748 | 1.00 | 0.00 |
| H      |      |    |     |    |        |        |        |      |      |
| HETATM | 2029 | C3 | PRP | 72 | 45.390 | 24.277 | 48.275 | 1.00 | 0.00 |
| C      |      |    |     |    |        |        |        |      |      |
| HETATM | 2030 | H6 | PRP | 72 | 46.113 | 24.930 | 47.787 | 1.00 | 0.00 |
| H      |      |    |     |    |        |        |        |      |      |
| HETATM | 2031 | H7 | PRP | 72 | 45.256 | 23.303 | 47.806 | 1.00 | 0.00 |
| H      |      |    |     |    |        |        |        |      |      |
| HETATM | 2032 | H8 | PRP | 72 | 44.429 | 24.729 | 48.027 | 1.00 | 0.00 |
| H      |      |    |     |    |        |        |        |      |      |
| HETATM | 2033 | O1 | PRP | 73 | 40.434 | 13.181 | 41.733 | 1.00 | 0.00 |
| O      |      |    |     |    |        |        |        |      |      |
| HETATM | 2034 | H1 | PRP | 73 | 41.369 | 13.002 | 41.610 | 1.00 | 0.00 |
| H      |      |    |     |    |        |        |        |      |      |
| HETATM | 2035 | C1 | PRP | 73 | 39.985 | 12.477 | 42.807 | 1.00 | 0.00 |
| C      |      |    |     |    |        |        |        |      |      |
| HETATM | 2036 | H2 | PRP | 73 | 40.887 | 12.342 | 43.404 | 1.00 | 0.00 |
| H      |      |    |     |    |        |        |        |      |      |
| HETATM | 2037 | H3 | PRP | 73 | 39.358 | 13.033 | 43.504 | 1.00 | 0.00 |
| H      |      |    |     |    |        |        |        |      |      |
| HETATM | 2038 | C2 | PRP | 73 | 39.340 | 11.051 | 42.471 | 1.00 | 0.00 |
| C      |      |    |     |    |        |        |        |      |      |
| HETATM | 2039 | H4 | PRP | 73 | 39.306 | 10.625 | 43.474 | 1.00 | 0.00 |
| H      |      |    |     |    |        |        |        |      |      |
| HETATM | 2040 | O2 | PRP | 73 | 40.140 | 10.220 | 41.695 | 1.00 | 0.00 |
| O      |      |    |     |    |        |        |        |      |      |
| HETATM | 2041 | H5 | PRP | 73 | 39.832 | 9.325  | 41.859 | 1.00 | 0.00 |
| H      |      |    |     |    |        |        |        |      |      |
| HETATM | 2042 | C3 | PRP | 73 | 37.991 | 11.196 | 41.892 | 1.00 | 0.00 |
| C      |      |    |     |    |        |        |        |      |      |
| HETATM | 2043 | H6 | PRP | 73 | 37.518 | 10.239 | 41.673 | 1.00 | 0.00 |
| H      |      |    |     |    |        |        |        |      |      |

|        |      |    |     |    |        |        |        |      |      |
|--------|------|----|-----|----|--------|--------|--------|------|------|
| HETATM | 2044 | H7 | PRP | 73 | 37.337 | 11.669 | 42.625 | 1.00 | 0.00 |
| H      |      |    |     |    |        |        |        |      |      |
| HETATM | 2045 | H8 | PRP | 73 | 38.009 | 11.933 | 41.088 | 1.00 | 0.00 |
| H      |      |    |     |    |        |        |        |      |      |
| HETATM | 2046 | O1 | PRP | 74 | 28.929 | -3.598 | 40.362 | 1.00 | 0.00 |
| O      |      |    |     |    |        |        |        |      |      |
| HETATM | 2047 | H1 | PRP | 74 | 29.610 | -2.925 | 40.286 | 1.00 | 0.00 |
| H      |      |    |     |    |        |        |        |      |      |
| HETATM | 2048 | C1 | PRP | 74 | 27.716 | -3.250 | 39.624 | 1.00 | 0.00 |
| C      |      |    |     |    |        |        |        |      |      |
| HETATM | 2049 | H2 | PRP | 74 | 26.942 | -4.014 | 39.691 | 1.00 | 0.00 |
| H      |      |    |     |    |        |        |        |      |      |
| HETATM | 2050 | H3 | PRP | 74 | 27.273 | -2.327 | 39.997 | 1.00 | 0.00 |
| H      |      |    |     |    |        |        |        |      |      |
| HETATM | 2051 | C2 | PRP | 74 | 28.111 | -3.089 | 38.198 | 1.00 | 0.00 |
| C      |      |    |     |    |        |        |        |      |      |
| HETATM | 2052 | H4 | PRP | 74 | 28.700 | -3.947 | 37.873 | 1.00 | 0.00 |
| H      |      |    |     |    |        |        |        |      |      |
| HETATM | 2053 | O2 | PRP | 74 | 28.933 | -1.982 | 37.964 | 1.00 | 0.00 |
| O      |      |    |     |    |        |        |        |      |      |
| HETATM | 2054 | H5 | PRP | 74 | 29.370 | -2.197 | 37.137 | 1.00 | 0.00 |
| H      |      |    |     |    |        |        |        |      |      |
| HETATM | 2055 | C3 | PRP | 74 | 26.798 | -3.004 | 37.410 | 1.00 | 0.00 |
| C      |      |    |     |    |        |        |        |      |      |
| HETATM | 2056 | H6 | PRP | 74 | 26.067 | -2.340 | 37.870 | 1.00 | 0.00 |
| H      |      |    |     |    |        |        |        |      |      |
| HETATM | 2057 | H7 | PRP | 74 | 27.103 | -2.712 | 36.405 | 1.00 | 0.00 |
| H      |      |    |     |    |        |        |        |      |      |
| HETATM | 2058 | H8 | PRP | 74 | 26.497 | -4.046 | 37.306 | 1.00 | 0.00 |
| H      |      |    |     |    |        |        |        |      |      |
| HETATM | 2059 | O1 | PRP | 75 | 43.149 | 15.850 | 40.505 | 1.00 | 0.00 |
| O      |      |    |     |    |        |        |        |      |      |
| HETATM | 2060 | H1 | PRP | 75 | 43.517 | 14.965 | 40.461 | 1.00 | 0.00 |
| H      |      |    |     |    |        |        |        |      |      |
| HETATM | 2061 | C1 | PRP | 75 | 42.773 | 15.895 | 41.893 | 1.00 | 0.00 |
| C      |      |    |     |    |        |        |        |      |      |
| HETATM | 2062 | H2 | PRP | 75 | 42.945 | 16.887 | 42.313 | 1.00 | 0.00 |
| H      |      |    |     |    |        |        |        |      |      |
| HETATM | 2063 | H3 | PRP | 75 | 41.736 | 15.571 | 41.979 | 1.00 | 0.00 |
| H      |      |    |     |    |        |        |        |      |      |
| HETATM | 2064 | C2 | PRP | 75 | 43.630 | 14.909 | 42.691 | 1.00 | 0.00 |
| C      |      |    |     |    |        |        |        |      |      |
| HETATM | 2065 | H4 | PRP | 75 | 44.627 | 15.343 | 42.603 | 1.00 | 0.00 |
| H      |      |    |     |    |        |        |        |      |      |
| HETATM | 2066 | O2 | PRP | 75 | 43.615 | 13.602 | 42.145 | 1.00 | 0.00 |
| O      |      |    |     |    |        |        |        |      |      |
| HETATM | 2067 | H5 | PRP | 75 | 44.506 | 13.247 | 42.185 | 1.00 | 0.00 |
| H      |      |    |     |    |        |        |        |      |      |
| HETATM | 2068 | C3 | PRP | 75 | 43.243 | 14.832 | 44.121 | 1.00 | 0.00 |
| C      |      |    |     |    |        |        |        |      |      |
| HETATM | 2069 | H6 | PRP | 75 | 43.752 | 13.923 | 44.444 | 1.00 | 0.00 |
| H      |      |    |     |    |        |        |        |      |      |
| HETATM | 2070 | H7 | PRP | 75 | 43.718 | 15.643 | 44.672 | 1.00 | 0.00 |
| H      |      |    |     |    |        |        |        |      |      |
| HETATM | 2071 | H8 | PRP | 75 | 42.163 | 14.696 | 44.168 | 1.00 | 0.00 |
| H      |      |    |     |    |        |        |        |      |      |

|        |      |    |     |    |        |        |        |      |      |
|--------|------|----|-----|----|--------|--------|--------|------|------|
| HETATM | 2072 | O1 | PRP | 76 | 39.126 | 10.805 | 46.620 | 1.00 | 0.00 |
| O      |      |    |     |    |        |        |        |      |      |
| HETATM | 2073 | H1 | PRP | 76 | 39.628 | 9.987  | 46.645 | 1.00 | 0.00 |
| H      |      |    |     |    |        |        |        |      |      |
| HETATM | 2074 | C1 | PRP | 76 | 39.945 | 11.902 | 46.878 | 1.00 | 0.00 |
| C      |      |    |     |    |        |        |        |      |      |
| HETATM | 2075 | H2 | PRP | 76 | 39.795 | 12.776 | 46.244 | 1.00 | 0.00 |
| H      |      |    |     |    |        |        |        |      |      |
| HETATM | 2076 | H3 | PRP | 76 | 39.926 | 12.158 | 47.937 | 1.00 | 0.00 |
| H      |      |    |     |    |        |        |        |      |      |
| HETATM | 2077 | C2 | PRP | 76 | 41.412 | 11.467 | 46.493 | 1.00 | 0.00 |
| C      |      |    |     |    |        |        |        |      |      |
| HETATM | 2078 | H4 | PRP | 76 | 41.550 | 11.446 | 45.412 | 1.00 | 0.00 |
| H      |      |    |     |    |        |        |        |      |      |
| HETATM | 2079 | O2 | PRP | 76 | 41.727 | 10.214 | 47.095 | 1.00 | 0.00 |
| O      |      |    |     |    |        |        |        |      |      |
| HETATM | 2080 | H5 | PRP | 76 | 42.312 | 9.733  | 46.506 | 1.00 | 0.00 |
| H      |      |    |     |    |        |        |        |      |      |
| HETATM | 2081 | C3 | PRP | 76 | 42.414 | 12.492 | 47.073 | 1.00 | 0.00 |
| C      |      |    |     |    |        |        |        |      |      |
| HETATM | 2082 | H6 | PRP | 76 | 42.313 | 12.589 | 48.154 | 1.00 | 0.00 |
| H      |      |    |     |    |        |        |        |      |      |
| HETATM | 2083 | H7 | PRP | 76 | 43.430 | 12.155 | 46.867 | 1.00 | 0.00 |
| H      |      |    |     |    |        |        |        |      |      |
| HETATM | 2084 | H8 | PRP | 76 | 42.405 | 13.438 | 46.532 | 1.00 | 0.00 |
| H      |      |    |     |    |        |        |        |      |      |
| HETATM | 2085 | O1 | PRP | 77 | 27.920 | 6.853  | 53.456 | 1.00 | 0.00 |
| O      |      |    |     |    |        |        |        |      |      |
| HETATM | 2086 | H1 | PRP | 77 | 27.328 | 6.869  | 52.701 | 1.00 | 0.00 |
| H      |      |    |     |    |        |        |        |      |      |
| HETATM | 2087 | C1 | PRP | 77 | 28.571 | 8.113  | 53.585 | 1.00 | 0.00 |
| C      |      |    |     |    |        |        |        |      |      |
| HETATM | 2088 | H2 | PRP | 77 | 29.646 | 8.008  | 53.735 | 1.00 | 0.00 |
| H      |      |    |     |    |        |        |        |      |      |
| HETATM | 2089 | H3 | PRP | 77 | 28.272 | 8.829  | 52.819 | 1.00 | 0.00 |
| H      |      |    |     |    |        |        |        |      |      |
| HETATM | 2090 | C2 | PRP | 77 | 28.165 | 8.742  | 54.970 | 1.00 | 0.00 |
| C      |      |    |     |    |        |        |        |      |      |
| HETATM | 2091 | H4 | PRP | 77 | 28.301 | 8.052  | 55.803 | 1.00 | 0.00 |
| H      |      |    |     |    |        |        |        |      |      |
| HETATM | 2092 | O2 | PRP | 77 | 26.835 | 9.073  | 54.896 | 1.00 | 0.00 |
| O      |      |    |     |    |        |        |        |      |      |
| HETATM | 2093 | H5 | PRP | 77 | 26.389 | 8.379  | 54.405 | 1.00 | 0.00 |
| H      |      |    |     |    |        |        |        |      |      |
| HETATM | 2094 | C3 | PRP | 77 | 29.140 | 9.949  | 55.364 | 1.00 | 0.00 |
| C      |      |    |     |    |        |        |        |      |      |
| HETATM | 2095 | H6 | PRP | 77 | 28.702 | 10.464 | 56.218 | 1.00 | 0.00 |
| H      |      |    |     |    |        |        |        |      |      |
| HETATM | 2096 | H7 | PRP | 77 | 30.148 | 9.775  | 55.740 | 1.00 | 0.00 |
| H      |      |    |     |    |        |        |        |      |      |
| HETATM | 2097 | H8 | PRP | 77 | 29.022 | 10.756 | 54.641 | 1.00 | 0.00 |
| H      |      |    |     |    |        |        |        |      |      |
| HETATM | 2098 | O1 | PRP | 78 | 32.602 | 6.672  | 45.885 | 1.00 | 0.00 |
| O      |      |    |     |    |        |        |        |      |      |
| HETATM | 2099 | H1 | PRP | 78 | 32.631 | 6.099  | 46.655 | 1.00 | 0.00 |
| H      |      |    |     |    |        |        |        |      |      |

|        |      |    |     |    |        |        |        |      |      |
|--------|------|----|-----|----|--------|--------|--------|------|------|
| HETATM | 2100 | C1 | PRP | 78 | 31.657 | 7.699  | 46.014 | 1.00 | 0.00 |
| C      |      |    |     |    |        |        |        |      |      |
| HETATM | 2101 | H2 | PRP | 78 | 30.680 | 7.351  | 46.350 | 1.00 | 0.00 |
| H      |      |    |     |    |        |        |        |      |      |
| HETATM | 2102 | H3 | PRP | 78 | 31.929 | 8.472  | 46.734 | 1.00 | 0.00 |
| H      |      |    |     |    |        |        |        |      |      |
| HETATM | 2103 | C2 | PRP | 78 | 31.451 | 8.290  | 44.630 | 1.00 | 0.00 |
| C      |      |    |     |    |        |        |        |      |      |
| HETATM | 2104 | H4 | PRP | 78 | 31.591 | 7.418  | 43.991 | 1.00 | 0.00 |
| H      |      |    |     |    |        |        |        |      |      |
| HETATM | 2105 | O2 | PRP | 78 | 32.558 | 9.185  | 44.454 | 1.00 | 0.00 |
| O      |      |    |     |    |        |        |        |      |      |
| HETATM | 2106 | H5 | PRP | 78 | 33.344 | 8.797  | 44.846 | 1.00 | 0.00 |
| H      |      |    |     |    |        |        |        |      |      |
| HETATM | 2107 | C3 | PRP | 78 | 30.109 | 8.914  | 44.360 | 1.00 | 0.00 |
| C      |      |    |     |    |        |        |        |      |      |
| HETATM | 2108 | H6 | PRP | 78 | 29.949 | 9.788  | 44.993 | 1.00 | 0.00 |
| H      |      |    |     |    |        |        |        |      |      |
| HETATM | 2109 | H7 | PRP | 78 | 30.071 | 9.288  | 43.337 | 1.00 | 0.00 |
| H      |      |    |     |    |        |        |        |      |      |
| HETATM | 2110 | H8 | PRP | 78 | 29.286 | 8.240  | 44.598 | 1.00 | 0.00 |
| H      |      |    |     |    |        |        |        |      |      |
| HETATM | 2111 | O1 | PRP | 79 | 26.062 | 40.972 | 46.744 | 1.00 | 0.00 |
| O      |      |    |     |    |        |        |        |      |      |
| HETATM | 2112 | H1 | PRP | 79 | 25.209 | 41.271 | 47.067 | 1.00 | 0.00 |
| H      |      |    |     |    |        |        |        |      |      |
| HETATM | 2113 | C1 | PRP | 79 | 27.142 | 41.327 | 47.619 | 1.00 | 0.00 |
| C      |      |    |     |    |        |        |        |      |      |
| HETATM | 2114 | H2 | PRP | 79 | 27.174 | 42.416 | 47.612 | 1.00 | 0.00 |
| H      |      |    |     |    |        |        |        |      |      |
| HETATM | 2115 | H3 | PRP | 79 | 26.969 | 40.991 | 48.641 | 1.00 | 0.00 |
| H      |      |    |     |    |        |        |        |      |      |
| HETATM | 2116 | C2 | PRP | 79 | 28.497 | 40.902 | 47.021 | 1.00 | 0.00 |
| C      |      |    |     |    |        |        |        |      |      |
| HETATM | 2117 | H4 | PRP | 79 | 28.725 | 41.379 | 46.068 | 1.00 | 0.00 |
| H      |      |    |     |    |        |        |        |      |      |
| HETATM | 2118 | O2 | PRP | 79 | 28.468 | 39.469 | 46.784 | 1.00 | 0.00 |
| O      |      |    |     |    |        |        |        |      |      |
| HETATM | 2119 | H5 | PRP | 79 | 27.762 | 39.288 | 46.160 | 1.00 | 0.00 |
| H      |      |    |     |    |        |        |        |      |      |
| HETATM | 2120 | C3 | PRP | 79 | 29.587 | 41.221 | 48.064 | 1.00 | 0.00 |
| C      |      |    |     |    |        |        |        |      |      |
| HETATM | 2121 | H6 | PRP | 79 | 29.336 | 42.237 | 48.369 | 1.00 | 0.00 |
| H      |      |    |     |    |        |        |        |      |      |
| HETATM | 2122 | H7 | PRP | 79 | 29.612 | 40.548 | 48.921 | 1.00 | 0.00 |
| H      |      |    |     |    |        |        |        |      |      |
| HETATM | 2123 | H8 | PRP | 79 | 30.617 | 41.165 | 47.714 | 1.00 | 0.00 |
| H      |      |    |     |    |        |        |        |      |      |
| HETATM | 2124 | O1 | PRP | 80 | 31.096 | 17.009 | 53.225 | 1.00 | 0.00 |
| O      |      |    |     |    |        |        |        |      |      |
| HETATM | 2125 | H1 | PRP | 80 | 31.548 | 16.434 | 52.603 | 1.00 | 0.00 |
| H      |      |    |     |    |        |        |        |      |      |
| HETATM | 2126 | C1 | PRP | 80 | 31.074 | 18.379 | 52.749 | 1.00 | 0.00 |
| C      |      |    |     |    |        |        |        |      |      |
| HETATM | 2127 | H2 | PRP | 80 | 30.521 | 18.449 | 51.812 | 1.00 | 0.00 |
| H      |      |    |     |    |        |        |        |      |      |

|        |      |    |     |    |        |        |        |      |      |
|--------|------|----|-----|----|--------|--------|--------|------|------|
| HETATM | 2128 | H3 | PRP | 80 | 30.652 | 19.073 | 53.475 | 1.00 | 0.00 |
| H      |      |    |     |    |        |        |        |      |      |
| HETATM | 2129 | C2 | PRP | 80 | 32.546 | 18.713 | 52.527 | 1.00 | 0.00 |
| C      |      |    |     |    |        |        |        |      |      |
| HETATM | 2130 | H4 | PRP | 80 | 33.059 | 17.899 | 52.016 | 1.00 | 0.00 |
| H      |      |    |     |    |        |        |        |      |      |
| HETATM | 2131 | O2 | PRP | 80 | 33.136 | 18.737 | 53.778 | 1.00 | 0.00 |
| O      |      |    |     |    |        |        |        |      |      |
| HETATM | 2132 | H5 | PRP | 80 | 32.469 | 18.503 | 54.427 | 1.00 | 0.00 |
| H      |      |    |     |    |        |        |        |      |      |
| HETATM | 2133 | C3 | PRP | 80 | 32.706 | 20.111 | 51.959 | 1.00 | 0.00 |
| C      |      |    |     |    |        |        |        |      |      |
| HETATM | 2134 | H6 | PRP | 80 | 32.078 | 20.772 | 52.556 | 1.00 | 0.00 |
| H      |      |    |     |    |        |        |        |      |      |
| HETATM | 2135 | H7 | PRP | 80 | 33.736 | 20.458 | 51.883 | 1.00 | 0.00 |
| H      |      |    |     |    |        |        |        |      |      |
| HETATM | 2136 | H8 | PRP | 80 | 32.339 | 20.155 | 50.933 | 1.00 | 0.00 |
| H      |      |    |     |    |        |        |        |      |      |
| HETATM | 2137 | O1 | PRP | 81 | 33.642 | 41.752 | 42.074 | 1.00 | 0.00 |
| O      |      |    |     |    |        |        |        |      |      |
| HETATM | 2138 | H1 | PRP | 81 | 34.420 | 41.294 | 42.400 | 1.00 | 0.00 |
| H      |      |    |     |    |        |        |        |      |      |
| HETATM | 2139 | C1 | PRP | 81 | 32.584 | 41.520 | 43.032 | 1.00 | 0.00 |
| C      |      |    |     |    |        |        |        |      |      |
| HETATM | 2140 | H2 | PRP | 81 | 32.578 | 42.176 | 43.903 | 1.00 | 0.00 |
| H      |      |    |     |    |        |        |        |      |      |
| HETATM | 2141 | H3 | PRP | 81 | 31.666 | 41.765 | 42.497 | 1.00 | 0.00 |
| H      |      |    |     |    |        |        |        |      |      |
| HETATM | 2142 | C2 | PRP | 81 | 32.415 | 40.013 | 43.489 | 1.00 | 0.00 |
| C      |      |    |     |    |        |        |        |      |      |
| HETATM | 2143 | H4 | PRP | 81 | 33.389 | 39.662 | 43.831 | 1.00 | 0.00 |
| H      |      |    |     |    |        |        |        |      |      |
| HETATM | 2144 | O2 | PRP | 81 | 31.879 | 39.259 | 42.384 | 1.00 | 0.00 |
| O      |      |    |     |    |        |        |        |      |      |
| HETATM | 2145 | H5 | PRP | 81 | 32.615 | 38.864 | 41.911 | 1.00 | 0.00 |
| H      |      |    |     |    |        |        |        |      |      |
| HETATM | 2146 | C3 | PRP | 81 | 31.621 | 39.861 | 44.801 | 1.00 | 0.00 |
| C      |      |    |     |    |        |        |        |      |      |
| HETATM | 2147 | H6 | PRP | 81 | 32.010 | 40.439 | 45.639 | 1.00 | 0.00 |
| H      |      |    |     |    |        |        |        |      |      |
| HETATM | 2148 | H7 | PRP | 81 | 30.629 | 40.293 | 44.670 | 1.00 | 0.00 |
| H      |      |    |     |    |        |        |        |      |      |
| HETATM | 2149 | H8 | PRP | 81 | 31.447 | 38.802 | 44.993 | 1.00 | 0.00 |
| H      |      |    |     |    |        |        |        |      |      |
| HETATM | 2150 | O1 | PRP | 82 | 29.465 | 38.018 | 42.673 | 1.00 | 0.00 |
| O      |      |    |     |    |        |        |        |      |      |
| HETATM | 2151 | H1 | PRP | 82 | 30.415 | 38.158 | 42.649 | 1.00 | 0.00 |
| H      |      |    |     |    |        |        |        |      |      |
| HETATM | 2152 | C1 | PRP | 82 | 29.242 | 37.245 | 43.838 | 1.00 | 0.00 |
| C      |      |    |     |    |        |        |        |      |      |
| HETATM | 2153 | H2 | PRP | 82 | 29.929 | 36.405 | 43.732 | 1.00 | 0.00 |
| H      |      |    |     |    |        |        |        |      |      |
| HETATM | 2154 | H3 | PRP | 82 | 29.477 | 37.794 | 44.750 | 1.00 | 0.00 |
| H      |      |    |     |    |        |        |        |      |      |
| HETATM | 2155 | C2 | PRP | 82 | 27.884 | 36.592 | 43.958 | 1.00 | 0.00 |
| C      |      |    |     |    |        |        |        |      |      |



|        |      |    |     |    |        |        |        |      |      |
|--------|------|----|-----|----|--------|--------|--------|------|------|
| HETATM | 2156 | H4 | PRP | 82 | 27.556 | 36.402 | 42.935 | 1.00 | 0.00 |
| H      |      |    |     |    |        |        |        |      |      |
| HETATM | 2157 | O2 | PRP | 82 | 26.937 | 37.273 | 44.761 | 1.00 | 0.00 |
| O      |      |    |     |    |        |        |        |      |      |
| HETATM | 2158 | H5 | PRP | 82 | 26.443 | 37.853 | 44.177 | 1.00 | 0.00 |
| H      |      |    |     |    |        |        |        |      |      |
| HETATM | 2159 | C3 | PRP | 82 | 28.023 | 35.188 | 44.456 | 1.00 | 0.00 |
| C      |      |    |     |    |        |        |        |      |      |
| HETATM | 2160 | H6 | PRP | 82 | 28.569 | 34.517 | 43.793 | 1.00 | 0.00 |
| H      |      |    |     |    |        |        |        |      |      |
| HETATM | 2161 | H7 | PRP | 82 | 28.366 | 35.156 | 45.490 | 1.00 | 0.00 |
| H      |      |    |     |    |        |        |        |      |      |
| HETATM | 2162 | H8 | PRP | 82 | 27.044 | 34.714 | 44.533 | 1.00 | 0.00 |
| H      |      |    |     |    |        |        |        |      |      |
| HETATM | 2163 | O1 | PRP | 83 | 12.256 | 17.278 | 46.977 | 1.00 | 0.00 |
| O      |      |    |     |    |        |        |        |      |      |
| HETATM | 2164 | H1 | PRP | 83 | 11.970 | 16.499 | 46.495 | 1.00 | 0.00 |
| H      |      |    |     |    |        |        |        |      |      |
| HETATM | 2165 | C1 | PRP | 83 | 13.618 | 17.069 | 46.927 | 1.00 | 0.00 |
| C      |      |    |     |    |        |        |        |      |      |
| HETATM | 2166 | H2 | PRP | 83 | 13.872 | 16.536 | 46.010 | 1.00 | 0.00 |
| H      |      |    |     |    |        |        |        |      |      |
| HETATM | 2167 | H3 | PRP | 83 | 14.158 | 18.015 | 46.958 | 1.00 | 0.00 |
| H      |      |    |     |    |        |        |        |      |      |
| HETATM | 2168 | C2 | PRP | 83 | 14.041 | 16.184 | 48.068 | 1.00 | 0.00 |
| C      |      |    |     |    |        |        |        |      |      |
| HETATM | 2169 | H4 | PRP | 83 | 13.409 | 15.298 | 48.123 | 1.00 | 0.00 |
| H      |      |    |     |    |        |        |        |      |      |
| HETATM | 2170 | O2 | PRP | 83 | 13.840 | 16.872 | 49.220 | 1.00 | 0.00 |
| O      |      |    |     |    |        |        |        |      |      |
| HETATM | 2171 | H5 | PRP | 83 | 13.217 | 17.578 | 49.034 | 1.00 | 0.00 |
| H      |      |    |     |    |        |        |        |      |      |
| HETATM | 2172 | C3 | PRP | 83 | 15.550 | 15.804 | 48.017 | 1.00 | 0.00 |
| C      |      |    |     |    |        |        |        |      |      |
| HETATM | 2173 | H6 | PRP | 83 | 16.109 | 16.518 | 48.621 | 1.00 | 0.00 |
| H      |      |    |     |    |        |        |        |      |      |
| HETATM | 2174 | H7 | PRP | 83 | 15.805 | 14.835 | 48.445 | 1.00 | 0.00 |
| H      |      |    |     |    |        |        |        |      |      |
| HETATM | 2175 | H8 | PRP | 83 | 15.930 | 15.774 | 46.996 | 1.00 | 0.00 |
| H      |      |    |     |    |        |        |        |      |      |
| HETATM | 2176 | O1 | PRP | 84 | 29.634 | 20.891 | 42.008 | 1.00 | 0.00 |
| O      |      |    |     |    |        |        |        |      |      |
| HETATM | 2177 | H1 | PRP | 84 | 30.584 | 20.775 | 41.928 | 1.00 | 0.00 |
| H      |      |    |     |    |        |        |        |      |      |
| HETATM | 2178 | C1 | PRP | 84 | 29.130 | 19.643 | 41.540 | 1.00 | 0.00 |
| C      |      |    |     |    |        |        |        |      |      |
| HETATM | 2179 | H2 | PRP | 84 | 29.123 | 18.842 | 42.279 | 1.00 | 0.00 |
| H      |      |    |     |    |        |        |        |      |      |
| HETATM | 2180 | H3 | PRP | 84 | 28.128 | 19.785 | 41.134 | 1.00 | 0.00 |
| H      |      |    |     |    |        |        |        |      |      |
| HETATM | 2181 | C2 | PRP | 84 | 30.057 | 19.193 | 40.396 | 1.00 | 0.00 |
| C      |      |    |     |    |        |        |        |      |      |
| HETATM | 2182 | H4 | PRP | 84 | 29.916 | 18.165 | 40.061 | 1.00 | 0.00 |
| H      |      |    |     |    |        |        |        |      |      |
| HETATM | 2183 | O2 | PRP | 84 | 31.365 | 19.131 | 40.850 | 1.00 | 0.00 |
| O      |      |    |     |    |        |        |        |      |      |

|        |      |    |     |    |        |        |        |      |      |
|--------|------|----|-----|----|--------|--------|--------|------|------|
| HETATM | 2184 | H5 | PRP | 84 | 31.502 | 18.308 | 41.326 | 1.00 | 0.00 |
| H      |      |    |     |    |        |        |        |      |      |
| HETATM | 2185 | C3 | PRP | 84 | 29.993 | 20.165 | 39.176 | 1.00 | 0.00 |
| C      |      |    |     |    |        |        |        |      |      |
| HETATM | 2186 | H6 | PRP | 84 | 28.946 | 20.053 | 38.896 | 1.00 | 0.00 |
| H      |      |    |     |    |        |        |        |      |      |
| HETATM | 2187 | H7 | PRP | 84 | 30.314 | 21.161 | 39.482 | 1.00 | 0.00 |
| H      |      |    |     |    |        |        |        |      |      |
| HETATM | 2188 | H8 | PRP | 84 | 30.682 | 19.788 | 38.420 | 1.00 | 0.00 |
| H      |      |    |     |    |        |        |        |      |      |
| HETATM | 2189 | O1 | PRP | 85 | 21.782 | 19.813 | 45.675 | 1.00 | 0.00 |
| O      |      |    |     |    |        |        |        |      |      |
| HETATM | 2190 | H1 | PRP | 85 | 20.982 | 19.759 | 46.203 | 1.00 | 0.00 |
| H      |      |    |     |    |        |        |        |      |      |
| HETATM | 2191 | C1 | PRP | 85 | 22.797 | 19.303 | 46.463 | 1.00 | 0.00 |
| C      |      |    |     |    |        |        |        |      |      |
| HETATM | 2192 | H2 | PRP | 85 | 22.399 | 18.606 | 47.200 | 1.00 | 0.00 |
| H      |      |    |     |    |        |        |        |      |      |
| HETATM | 2193 | H3 | PRP | 85 | 23.582 | 18.857 | 45.851 | 1.00 | 0.00 |
| H      |      |    |     |    |        |        |        |      |      |
| HETATM | 2194 | C2 | PRP | 85 | 23.339 | 20.455 | 47.350 | 1.00 | 0.00 |
| C      |      |    |     |    |        |        |        |      |      |
| HETATM | 2195 | H4 | PRP | 85 | 22.534 | 20.920 | 47.918 | 1.00 | 0.00 |
| H      |      |    |     |    |        |        |        |      |      |
| HETATM | 2196 | O2 | PRP | 85 | 24.069 | 21.338 | 46.552 | 1.00 | 0.00 |
| O      |      |    |     |    |        |        |        |      |      |
| HETATM | 2197 | H5 | PRP | 85 | 23.541 | 21.632 | 45.806 | 1.00 | 0.00 |
| H      |      |    |     |    |        |        |        |      |      |
| HETATM | 2198 | C3 | PRP | 85 | 24.315 | 19.895 | 48.318 | 1.00 | 0.00 |
| C      |      |    |     |    |        |        |        |      |      |
| HETATM | 2199 | H6 | PRP | 85 | 25.170 | 19.343 | 47.930 | 1.00 | 0.00 |
| H      |      |    |     |    |        |        |        |      |      |
| HETATM | 2200 | H7 | PRP | 85 | 24.702 | 20.708 | 48.933 | 1.00 | 0.00 |
| H      |      |    |     |    |        |        |        |      |      |
| HETATM | 2201 | H8 | PRP | 85 | 23.876 | 19.198 | 49.032 | 1.00 | 0.00 |
| H      |      |    |     |    |        |        |        |      |      |
| HETATM | 2202 | O1 | PRP | 86 | 36.680 | 11.360 | 44.956 | 1.00 | 0.00 |
| O      |      |    |     |    |        |        |        |      |      |
| HETATM | 2203 | H1 | PRP | 86 | 37.403 | 11.507 | 45.570 | 1.00 | 0.00 |
| H      |      |    |     |    |        |        |        |      |      |
| HETATM | 2204 | C1 | PRP | 86 | 35.762 | 12.326 | 45.325 | 1.00 | 0.00 |
| C      |      |    |     |    |        |        |        |      |      |
| HETATM | 2205 | H2 | PRP | 86 | 34.917 | 12.261 | 44.638 | 1.00 | 0.00 |
| H      |      |    |     |    |        |        |        |      |      |
| HETATM | 2206 | H3 | PRP | 86 | 35.404 | 12.132 | 46.336 | 1.00 | 0.00 |
| H      |      |    |     |    |        |        |        |      |      |
| HETATM | 2207 | C2 | PRP | 86 | 36.364 | 13.768 | 45.120 | 1.00 | 0.00 |
| C      |      |    |     |    |        |        |        |      |      |
| HETATM | 2208 | H4 | PRP | 86 | 36.464 | 13.860 | 44.039 | 1.00 | 0.00 |
| H      |      |    |     |    |        |        |        |      |      |
| HETATM | 2209 | O2 | PRP | 86 | 37.672 | 13.769 | 45.760 | 1.00 | 0.00 |
| O      |      |    |     |    |        |        |        |      |      |
| HETATM | 2210 | H5 | PRP | 86 | 37.567 | 14.250 | 46.585 | 1.00 | 0.00 |
| H      |      |    |     |    |        |        |        |      |      |
| HETATM | 2211 | C3 | PRP | 86 | 35.348 | 14.747 | 45.735 | 1.00 | 0.00 |
| C      |      |    |     |    |        |        |        |      |      |

|        |      |    |     |    |        |        |        |      |      |
|--------|------|----|-----|----|--------|--------|--------|------|------|
| HETATM | 2212 | H6 | PRP | 86 | 35.777 | 15.718 | 45.983 | 1.00 | 0.00 |
| H      |      |    |     |    |        |        |        |      |      |
| HETATM | 2213 | H7 | PRP | 86 | 34.504 | 14.970 | 45.082 | 1.00 | 0.00 |
| H      |      |    |     |    |        |        |        |      |      |
| HETATM | 2214 | H8 | PRP | 86 | 34.963 | 14.427 | 46.703 | 1.00 | 0.00 |
| H      |      |    |     |    |        |        |        |      |      |
| HETATM | 2215 | O1 | PRP | 87 | 22.461 | 28.798 | 47.570 | 1.00 | 0.00 |
| O      |      |    |     |    |        |        |        |      |      |
| HETATM | 2216 | H1 | PRP | 87 | 22.577 | 29.570 | 48.128 | 1.00 | 0.00 |
| H      |      |    |     |    |        |        |        |      |      |
| HETATM | 2217 | C1 | PRP | 87 | 21.176 | 28.902 | 46.982 | 1.00 | 0.00 |
| C      |      |    |     |    |        |        |        |      |      |
| HETATM | 2218 | H2 | PRP | 87 | 20.592 | 28.012 | 47.218 | 1.00 | 0.00 |
| H      |      |    |     |    |        |        |        |      |      |
| HETATM | 2219 | H3 | PRP | 87 | 20.652 | 29.717 | 47.482 | 1.00 | 0.00 |
| H      |      |    |     |    |        |        |        |      |      |
| HETATM | 2220 | C2 | PRP | 87 | 21.112 | 29.096 | 45.507 | 1.00 | 0.00 |
| C      |      |    |     |    |        |        |        |      |      |
| HETATM | 2221 | H4 | PRP | 87 | 20.080 | 29.143 | 45.159 | 1.00 | 0.00 |
| H      |      |    |     |    |        |        |        |      |      |
| HETATM | 2222 | O2 | PRP | 87 | 21.696 | 28.019 | 44.823 | 1.00 | 0.00 |
| O      |      |    |     |    |        |        |        |      |      |
| HETATM | 2223 | H5 | PRP | 87 | 21.552 | 27.252 | 45.383 | 1.00 | 0.00 |
| H      |      |    |     |    |        |        |        |      |      |
| HETATM | 2224 | C3 | PRP | 87 | 22.005 | 30.276 | 45.063 | 1.00 | 0.00 |
| C      |      |    |     |    |        |        |        |      |      |
| HETATM | 2225 | H6 | PRP | 87 | 21.802 | 30.451 | 44.007 | 1.00 | 0.00 |
| H      |      |    |     |    |        |        |        |      |      |
| HETATM | 2226 | H7 | PRP | 87 | 21.664 | 31.184 | 45.559 | 1.00 | 0.00 |
| H      |      |    |     |    |        |        |        |      |      |
| HETATM | 2227 | H8 | PRP | 87 | 23.063 | 30.060 | 45.213 | 1.00 | 0.00 |
| H      |      |    |     |    |        |        |        |      |      |
| HETATM | 2228 | O1 | PRP | 88 | 29.596 | 37.928 | 38.521 | 1.00 | 0.00 |
| O      |      |    |     |    |        |        |        |      |      |
| HETATM | 2229 | H1 | PRP | 88 | 28.851 | 37.328 | 38.611 | 1.00 | 0.00 |
| H      |      |    |     |    |        |        |        |      |      |
| HETATM | 2230 | C1 | PRP | 88 | 29.685 | 38.878 | 39.594 | 1.00 | 0.00 |
| C      |      |    |     |    |        |        |        |      |      |
| HETATM | 2231 | H2 | PRP | 88 | 28.756 | 38.995 | 40.152 | 1.00 | 0.00 |
| H      |      |    |     |    |        |        |        |      |      |
| HETATM | 2232 | H3 | PRP | 88 | 30.388 | 38.600 | 40.379 | 1.00 | 0.00 |
| H      |      |    |     |    |        |        |        |      |      |
| HETATM | 2233 | C2 | PRP | 88 | 30.254 | 40.174 | 39.058 | 1.00 | 0.00 |
| C      |      |    |     |    |        |        |        |      |      |
| HETATM | 2234 | H4 | PRP | 88 | 30.324 | 40.873 | 39.891 | 1.00 | 0.00 |
| H      |      |    |     |    |        |        |        |      |      |
| HETATM | 2235 | O2 | PRP | 88 | 29.383 | 40.716 | 38.144 | 1.00 | 0.00 |
| O      |      |    |     |    |        |        |        |      |      |
| HETATM | 2236 | H5 | PRP | 88 | 29.825 | 41.014 | 37.345 | 1.00 | 0.00 |
| H      |      |    |     |    |        |        |        |      |      |
| HETATM | 2237 | C3 | PRP | 88 | 31.687 | 39.958 | 38.529 | 1.00 | 0.00 |
| C      |      |    |     |    |        |        |        |      |      |
| HETATM | 2238 | H6 | PRP | 88 | 31.538 | 39.514 | 37.545 | 1.00 | 0.00 |
| H      |      |    |     |    |        |        |        |      |      |
| HETATM | 2239 | H7 | PRP | 88 | 32.181 | 40.927 | 38.445 | 1.00 | 0.00 |
| H      |      |    |     |    |        |        |        |      |      |

|        |      |    |     |    |        |        |        |      |      |
|--------|------|----|-----|----|--------|--------|--------|------|------|
| HETATM | 2240 | H8 | PRP | 88 | 32.352 | 39.379 | 39.170 | 1.00 | 0.00 |
| H      |      |    |     |    |        |        |        |      |      |
| HETATM | 2241 | O1 | PRP | 89 | 33.610 | 45.696 | 37.377 | 1.00 | 0.00 |
| O      |      |    |     |    |        |        |        |      |      |
| HETATM | 2242 | H1 | PRP | 89 | 33.642 | 45.314 | 38.257 | 1.00 | 0.00 |
| H      |      |    |     |    |        |        |        |      |      |
| HETATM | 2243 | C1 | PRP | 89 | 34.623 | 45.067 | 36.589 | 1.00 | 0.00 |
| C      |      |    |     |    |        |        |        |      |      |
| HETATM | 2244 | H2 | PRP | 89 | 34.581 | 45.464 | 35.574 | 1.00 | 0.00 |
| H      |      |    |     |    |        |        |        |      |      |
| HETATM | 2245 | H3 | PRP | 89 | 35.558 | 45.427 | 37.017 | 1.00 | 0.00 |
| H      |      |    |     |    |        |        |        |      |      |
| HETATM | 2246 | C2 | PRP | 89 | 34.629 | 43.524 | 36.651 | 1.00 | 0.00 |
| C      |      |    |     |    |        |        |        |      |      |
| HETATM | 2247 | H4 | PRP | 89 | 35.474 | 43.107 | 36.104 | 1.00 | 0.00 |
| H      |      |    |     |    |        |        |        |      |      |
| HETATM | 2248 | O2 | PRP | 89 | 33.420 | 43.066 | 36.194 | 1.00 | 0.00 |
| O      |      |    |     |    |        |        |        |      |      |
| HETATM | 2249 | H5 | PRP | 89 | 33.676 | 42.146 | 36.091 | 1.00 | 0.00 |
| H      |      |    |     |    |        |        |        |      |      |
| HETATM | 2250 | C3 | PRP | 89 | 34.948 | 43.057 | 38.107 | 1.00 | 0.00 |
| C      |      |    |     |    |        |        |        |      |      |
| HETATM | 2251 | H6 | PRP | 89 | 35.987 | 43.156 | 38.421 | 1.00 | 0.00 |
| H      |      |    |     |    |        |        |        |      |      |
| HETATM | 2252 | H7 | PRP | 89 | 34.435 | 43.684 | 38.837 | 1.00 | 0.00 |
| H      |      |    |     |    |        |        |        |      |      |
| HETATM | 2253 | H8 | PRP | 89 | 34.664 | 42.016 | 38.258 | 1.00 | 0.00 |
| H      |      |    |     |    |        |        |        |      |      |
| HETATM | 2254 | O1 | PRP | 90 | 32.965 | 5.483  | 41.461 | 1.00 | 0.00 |
| O      |      |    |     |    |        |        |        |      |      |
| HETATM | 2255 | H1 | PRP | 90 | 32.959 | 4.580  | 41.134 | 1.00 | 0.00 |
| H      |      |    |     |    |        |        |        |      |      |
| HETATM | 2256 | C1 | PRP | 90 | 33.715 | 5.429  | 42.615 | 1.00 | 0.00 |
| C      |      |    |     |    |        |        |        |      |      |
| HETATM | 2257 | H2 | PRP | 90 | 34.768 | 5.379  | 42.337 | 1.00 | 0.00 |
| H      |      |    |     |    |        |        |        |      |      |
| HETATM | 2258 | H3 | PRP | 90 | 33.458 | 6.334  | 43.166 | 1.00 | 0.00 |
| H      |      |    |     |    |        |        |        |      |      |
| HETATM | 2259 | C2 | PRP | 90 | 33.313 | 4.284  | 43.518 | 1.00 | 0.00 |
| C      |      |    |     |    |        |        |        |      |      |
| HETATM | 2260 | H4 | PRP | 90 | 33.858 | 4.385  | 44.457 | 1.00 | 0.00 |
| H      |      |    |     |    |        |        |        |      |      |
| HETATM | 2261 | O2 | PRP | 90 | 33.603 | 3.108  | 42.818 | 1.00 | 0.00 |
| O      |      |    |     |    |        |        |        |      |      |
| HETATM | 2262 | H5 | PRP | 90 | 33.550 | 2.362  | 43.420 | 1.00 | 0.00 |
| H      |      |    |     |    |        |        |        |      |      |
| HETATM | 2263 | C3 | PRP | 90 | 31.862 | 4.201  | 43.829 | 1.00 | 0.00 |
| C      |      |    |     |    |        |        |        |      |      |
| HETATM | 2264 | H6 | PRP | 90 | 31.272 | 3.804  | 43.003 | 1.00 | 0.00 |
| H      |      |    |     |    |        |        |        |      |      |
| HETATM | 2265 | H7 | PRP | 90 | 31.847 | 3.503  | 44.666 | 1.00 | 0.00 |
| H      |      |    |     |    |        |        |        |      |      |
| HETATM | 2266 | H8 | PRP | 90 | 31.426 | 5.172  | 44.066 | 1.00 | 0.00 |
| H      |      |    |     |    |        |        |        |      |      |
| HETATM | 2267 | O1 | PRP | 91 | 31.524 | 12.005 | 36.638 | 1.00 | 0.00 |
| O      |      |    |     |    |        |        |        |      |      |

|        |      |    |     |    |        |        |        |      |      |
|--------|------|----|-----|----|--------|--------|--------|------|------|
| HETATM | 2268 | H1 | PRP | 91 | 31.369 | 11.161 | 37.068 | 1.00 | 0.00 |
| H      |      |    |     |    |        |        |        |      |      |
| HETATM | 2269 | C1 | PRP | 91 | 31.535 | 12.974 | 37.691 | 1.00 | 0.00 |
| C      |      |    |     |    |        |        |        |      |      |
| HETATM | 2270 | H2 | PRP | 91 | 30.656 | 12.832 | 38.320 | 1.00 | 0.00 |
| H      |      |    |     |    |        |        |        |      |      |
| HETATM | 2271 | H3 | PRP | 91 | 32.452 | 12.905 | 38.276 | 1.00 | 0.00 |
| H      |      |    |     |    |        |        |        |      |      |
| HETATM | 2272 | C2 | PRP | 91 | 31.359 | 14.392 | 37.170 | 1.00 | 0.00 |
| C      |      |    |     |    |        |        |        |      |      |
| HETATM | 2273 | H4 | PRP | 91 | 30.401 | 14.555 | 36.677 | 1.00 | 0.00 |
| H      |      |    |     |    |        |        |        |      |      |
| HETATM | 2274 | O2 | PRP | 91 | 32.287 | 14.749 | 36.105 | 1.00 | 0.00 |
| O      |      |    |     |    |        |        |        |      |      |
| HETATM | 2275 | H5 | PRP | 91 | 32.734 | 13.984 | 35.735 | 1.00 | 0.00 |
| H      |      |    |     |    |        |        |        |      |      |
| HETATM | 2276 | C3 | PRP | 91 | 31.542 | 15.417 | 38.304 | 1.00 | 0.00 |
| C      |      |    |     |    |        |        |        |      |      |
| HETATM | 2277 | H6 | PRP | 91 | 31.122 | 16.383 | 38.023 | 1.00 | 0.00 |
| H      |      |    |     |    |        |        |        |      |      |
| HETATM | 2278 | H7 | PRP | 91 | 31.098 | 14.988 | 39.203 | 1.00 | 0.00 |
| H      |      |    |     |    |        |        |        |      |      |
| HETATM | 2279 | H8 | PRP | 91 | 32.598 | 15.577 | 38.522 | 1.00 | 0.00 |
| H      |      |    |     |    |        |        |        |      |      |
| HETATM | 2280 | O1 | PRP | 92 | 35.542 | 26.970 | 50.599 | 1.00 | 0.00 |
| O      |      |    |     |    |        |        |        |      |      |
| HETATM | 2281 | H1 | PRP | 92 | 36.408 | 26.688 | 50.906 | 1.00 | 0.00 |
| H      |      |    |     |    |        |        |        |      |      |
| HETATM | 2282 | C1 | PRP | 92 | 34.595 | 26.200 | 51.309 | 1.00 | 0.00 |
| C      |      |    |     |    |        |        |        |      |      |
| HETATM | 2283 | H2 | PRP | 92 | 33.933 | 26.768 | 51.962 | 1.00 | 0.00 |
| H      |      |    |     |    |        |        |        |      |      |
| HETATM | 2284 | H3 | PRP | 92 | 33.933 | 25.874 | 50.506 | 1.00 | 0.00 |
| H      |      |    |     |    |        |        |        |      |      |
| HETATM | 2285 | C2 | PRP | 92 | 35.290 | 24.935 | 51.912 | 1.00 | 0.00 |
| C      |      |    |     |    |        |        |        |      |      |
| HETATM | 2286 | H4 | PRP | 92 | 34.833 | 24.617 | 52.849 | 1.00 | 0.00 |
| H      |      |    |     |    |        |        |        |      |      |
| HETATM | 2287 | O2 | PRP | 92 | 36.657 | 25.222 | 52.168 | 1.00 | 0.00 |
| O      |      |    |     |    |        |        |        |      |      |
| HETATM | 2288 | H5 | PRP | 92 | 36.844 | 25.319 | 53.105 | 1.00 | 0.00 |
| H      |      |    |     |    |        |        |        |      |      |
| HETATM | 2289 | C3 | PRP | 92 | 35.197 | 23.791 | 50.930 | 1.00 | 0.00 |
| C      |      |    |     |    |        |        |        |      |      |
| HETATM | 2290 | H6 | PRP | 92 | 35.579 | 22.993 | 51.567 | 1.00 | 0.00 |
| H      |      |    |     |    |        |        |        |      |      |
| HETATM | 2291 | H7 | PRP | 92 | 34.163 | 23.716 | 50.594 | 1.00 | 0.00 |
| H      |      |    |     |    |        |        |        |      |      |
| HETATM | 2292 | H8 | PRP | 92 | 35.952 | 24.025 | 50.180 | 1.00 | 0.00 |
| H      |      |    |     |    |        |        |        |      |      |
| HETATM | 2293 | O1 | PRP | 93 | 46.410 | 24.032 | 35.649 | 1.00 | 0.00 |
| O      |      |    |     |    |        |        |        |      |      |
| HETATM | 2294 | H1 | PRP | 93 | 46.673 | 24.953 | 35.595 | 1.00 | 0.00 |
| H      |      |    |     |    |        |        |        |      |      |
| HETATM | 2295 | C1 | PRP | 93 | 45.573 | 23.761 | 36.758 | 1.00 | 0.00 |
| C      |      |    |     |    |        |        |        |      |      |

|        |      |    |     |    |        |        |        |      |      |
|--------|------|----|-----|----|--------|--------|--------|------|------|
| HETATM | 2296 | H2 | PRP | 93 | 46.081 | 24.105 | 37.659 | 1.00 | 0.00 |
| H      |      |    |     |    |        |        |        |      |      |
| HETATM | 2297 | H3 | PRP | 93 | 44.630 | 24.297 | 36.651 | 1.00 | 0.00 |
| H      |      |    |     |    |        |        |        |      |      |
| HETATM | 2298 | C2 | PRP | 93 | 45.332 | 22.302 | 36.948 | 1.00 | 0.00 |
| C      |      |    |     |    |        |        |        |      |      |
| HETATM | 2299 | H4 | PRP | 93 | 44.605 | 22.282 | 37.761 | 1.00 | 0.00 |
| H      |      |    |     |    |        |        |        |      |      |
| HETATM | 2300 | O2 | PRP | 93 | 46.552 | 21.584 | 37.414 | 1.00 | 0.00 |
| O      |      |    |     |    |        |        |        |      |      |
| HETATM | 2301 | H5 | PRP | 93 | 47.201 | 21.815 | 36.745 | 1.00 | 0.00 |
| H      |      |    |     |    |        |        |        |      |      |
| HETATM | 2302 | C3 | PRP | 93 | 44.638 | 21.730 | 35.638 | 1.00 | 0.00 |
| C      |      |    |     |    |        |        |        |      |      |
| HETATM | 2303 | H6 | PRP | 93 | 43.670 | 22.211 | 35.503 | 1.00 | 0.00 |
| H      |      |    |     |    |        |        |        |      |      |
| HETATM | 2304 | H7 | PRP | 93 | 45.153 | 22.004 | 34.718 | 1.00 | 0.00 |
| H      |      |    |     |    |        |        |        |      |      |
| HETATM | 2305 | H8 | PRP | 93 | 44.615 | 20.644 | 35.726 | 1.00 | 0.00 |
| H      |      |    |     |    |        |        |        |      |      |
| HETATM | 2306 | O1 | PRP | 94 | 42.616 | 37.438 | 36.025 | 1.00 | 0.00 |
| O      |      |    |     |    |        |        |        |      |      |
| HETATM | 2307 | H1 | PRP | 94 | 42.677 | 36.636 | 36.550 | 1.00 | 0.00 |
| H      |      |    |     |    |        |        |        |      |      |
| HETATM | 2308 | C1 | PRP | 94 | 42.972 | 38.535 | 36.775 | 1.00 | 0.00 |
| C      |      |    |     |    |        |        |        |      |      |
| HETATM | 2309 | H2 | PRP | 94 | 42.768 | 38.306 | 37.821 | 1.00 | 0.00 |
| H      |      |    |     |    |        |        |        |      |      |
| HETATM | 2310 | H3 | PRP | 94 | 43.995 | 38.663 | 36.420 | 1.00 | 0.00 |
| H      |      |    |     |    |        |        |        |      |      |
| HETATM | 2311 | C2 | PRP | 94 | 42.127 | 39.740 | 36.287 | 1.00 | 0.00 |
| C      |      |    |     |    |        |        |        |      |      |
| HETATM | 2312 | H4 | PRP | 94 | 41.082 | 39.575 | 36.549 | 1.00 | 0.00 |
| H      |      |    |     |    |        |        |        |      |      |
| HETATM | 2313 | O2 | PRP | 94 | 42.335 | 39.963 | 34.865 | 1.00 | 0.00 |
| O      |      |    |     |    |        |        |        |      |      |
| HETATM | 2314 | H5 | PRP | 94 | 42.341 | 39.117 | 34.411 | 1.00 | 0.00 |
| H      |      |    |     |    |        |        |        |      |      |
| HETATM | 2315 | C3 | PRP | 94 | 42.639 | 41.074 | 36.938 | 1.00 | 0.00 |
| C      |      |    |     |    |        |        |        |      |      |
| HETATM | 2316 | H6 | PRP | 94 | 42.074 | 41.963 | 36.658 | 1.00 | 0.00 |
| H      |      |    |     |    |        |        |        |      |      |
| HETATM | 2317 | H7 | PRP | 94 | 42.573 | 40.993 | 38.023 | 1.00 | 0.00 |
| H      |      |    |     |    |        |        |        |      |      |
| HETATM | 2318 | H8 | PRP | 94 | 43.713 | 41.162 | 36.775 | 1.00 | 0.00 |
| H      |      |    |     |    |        |        |        |      |      |
| HETATM | 2319 | O1 | PRP | 95 | 23.594 | 18.401 | 30.541 | 1.00 | 0.00 |
| O      |      |    |     |    |        |        |        |      |      |
| HETATM | 2320 | H1 | PRP | 95 | 22.832 | 18.916 | 30.817 | 1.00 | 0.00 |
| H      |      |    |     |    |        |        |        |      |      |
| HETATM | 2321 | C1 | PRP | 95 | 23.392 | 17.126 | 31.185 | 1.00 | 0.00 |
| C      |      |    |     |    |        |        |        |      |      |
| HETATM | 2322 | H2 | PRP | 95 | 22.710 | 16.605 | 30.513 | 1.00 | 0.00 |
| H      |      |    |     |    |        |        |        |      |      |
| HETATM | 2323 | H3 | PRP | 95 | 24.349 | 16.607 | 31.138 | 1.00 | 0.00 |
| H      |      |    |     |    |        |        |        |      |      |

|        |      |    |     |    |        |        |        |      |      |
|--------|------|----|-----|----|--------|--------|--------|------|------|
| HETATM | 2324 | C2 | PRP | 95 | 22.697 | 17.344 | 32.492 | 1.00 | 0.00 |
| C      |      |    |     |    |        |        |        |      |      |
| HETATM | 2325 | H4 | PRP | 95 | 22.393 | 16.382 | 32.904 | 1.00 | 0.00 |
| H      |      |    |     |    |        |        |        |      |      |
| HETATM | 2326 | O2 | PRP | 95 | 21.505 | 18.104 | 32.212 | 1.00 | 0.00 |
| O      |      |    |     |    |        |        |        |      |      |
| HETATM | 2327 | H5 | PRP | 95 | 20.936 | 18.086 | 32.985 | 1.00 | 0.00 |
| H      |      |    |     |    |        |        |        |      |      |
| HETATM | 2328 | C3 | PRP | 95 | 23.709 | 18.087 | 33.431 | 1.00 | 0.00 |
| C      |      |    |     |    |        |        |        |      |      |
| HETATM | 2329 | H6 | PRP | 95 | 24.740 | 17.779 | 33.256 | 1.00 | 0.00 |
| H      |      |    |     |    |        |        |        |      |      |
| HETATM | 2330 | H7 | PRP | 95 | 23.631 | 19.132 | 33.133 | 1.00 | 0.00 |
| H      |      |    |     |    |        |        |        |      |      |
| HETATM | 2331 | H8 | PRP | 95 | 23.353 | 18.120 | 34.461 | 1.00 | 0.00 |
| H      |      |    |     |    |        |        |        |      |      |
| HETATM | 2332 | O1 | PRP | 96 | 26.333 | 14.000 | 29.717 | 1.00 | 0.00 |
| O      |      |    |     |    |        |        |        |      |      |
| HETATM | 2333 | H1 | PRP | 96 | 25.973 | 14.252 | 30.571 | 1.00 | 0.00 |
| H      |      |    |     |    |        |        |        |      |      |
| HETATM | 2334 | C1 | PRP | 96 | 26.412 | 15.149 | 28.837 | 1.00 | 0.00 |
| C      |      |    |     |    |        |        |        |      |      |
| HETATM | 2335 | H2 | PRP | 96 | 25.803 | 14.931 | 27.959 | 1.00 | 0.00 |
| H      |      |    |     |    |        |        |        |      |      |
| HETATM | 2336 | H3 | PRP | 96 | 25.975 | 16.082 | 29.190 | 1.00 | 0.00 |
| H      |      |    |     |    |        |        |        |      |      |
| HETATM | 2337 | C2 | PRP | 96 | 27.873 | 15.399 | 28.586 | 1.00 | 0.00 |
| C      |      |    |     |    |        |        |        |      |      |
| HETATM | 2338 | H4 | PRP | 96 | 28.371 | 14.505 | 28.211 | 1.00 | 0.00 |
| H      |      |    |     |    |        |        |        |      |      |
| HETATM | 2339 | O2 | PRP | 96 | 28.615 | 15.924 | 29.678 | 1.00 | 0.00 |
| O      |      |    |     |    |        |        |        |      |      |
| HETATM | 2340 | H5 | PRP | 96 | 29.016 | 15.173 | 30.120 | 1.00 | 0.00 |
| H      |      |    |     |    |        |        |        |      |      |
| HETATM | 2341 | C3 | PRP | 96 | 27.992 | 16.320 | 27.388 | 1.00 | 0.00 |
| C      |      |    |     |    |        |        |        |      |      |
| HETATM | 2342 | H6 | PRP | 96 | 27.624 | 15.796 | 26.506 | 1.00 | 0.00 |
| H      |      |    |     |    |        |        |        |      |      |
| HETATM | 2343 | H7 | PRP | 96 | 27.402 | 17.220 | 27.562 | 1.00 | 0.00 |
| H      |      |    |     |    |        |        |        |      |      |
| HETATM | 2344 | H8 | PRP | 96 | 28.998 | 16.635 | 27.110 | 1.00 | 0.00 |
| H      |      |    |     |    |        |        |        |      |      |
| HETATM | 2345 | O1 | PRP | 97 | 33.563 | 13.294 | 41.173 | 1.00 | 0.00 |
| O      |      |    |     |    |        |        |        |      |      |
| HETATM | 2346 | H1 | PRP | 97 | 32.643 | 13.022 | 41.198 | 1.00 | 0.00 |
| H      |      |    |     |    |        |        |        |      |      |
| HETATM | 2347 | C1 | PRP | 97 | 34.235 | 12.211 | 41.670 | 1.00 | 0.00 |
| C      |      |    |     |    |        |        |        |      |      |
| HETATM | 2348 | H2 | PRP | 97 | 35.275 | 12.183 | 41.344 | 1.00 | 0.00 |
| H      |      |    |     |    |        |        |        |      |      |
| HETATM | 2349 | H3 | PRP | 97 | 34.257 | 12.309 | 42.755 | 1.00 | 0.00 |
| H      |      |    |     |    |        |        |        |      |      |
| HETATM | 2350 | C2 | PRP | 97 | 33.385 | 11.028 | 41.273 | 1.00 | 0.00 |
| C      |      |    |     |    |        |        |        |      |      |
| HETATM | 2351 | H4 | PRP | 97 | 33.081 | 11.041 | 40.227 | 1.00 | 0.00 |
| H      |      |    |     |    |        |        |        |      |      |

|        |      |    |     |    |        |        |        |      |      |
|--------|------|----|-----|----|--------|--------|--------|------|------|
| HETATM | 2352 | O2 | PRP | 97 | 32.275 | 11.043 | 42.001 | 1.00 | 0.00 |
| O      |      |    |     |    |        |        |        |      |      |
| HETATM | 2353 | H5 | PRP | 97 | 32.552 | 10.732 | 42.867 | 1.00 | 0.00 |
| H      |      |    |     |    |        |        |        |      |      |
| HETATM | 2354 | C3 | PRP | 97 | 34.152 | 9.719  | 41.495 | 1.00 | 0.00 |
| C      |      |    |     |    |        |        |        |      |      |
| HETATM | 2355 | H6 | PRP | 97 | 33.528 | 8.890  | 41.161 | 1.00 | 0.00 |
| H      |      |    |     |    |        |        |        |      |      |
| HETATM | 2356 | H7 | PRP | 97 | 35.081 | 9.615  | 40.934 | 1.00 | 0.00 |
| H      |      |    |     |    |        |        |        |      |      |
| HETATM | 2357 | H8 | PRP | 97 | 34.432 | 9.528  | 42.531 | 1.00 | 0.00 |
| H      |      |    |     |    |        |        |        |      |      |
| HETATM | 2358 | O1 | PRP | 98 | 48.322 | 16.504 | 48.738 | 1.00 | 0.00 |
| O      |      |    |     |    |        |        |        |      |      |
| HETATM | 2359 | H1 | PRP | 98 | 49.183 | 16.633 | 48.332 | 1.00 | 0.00 |
| H      |      |    |     |    |        |        |        |      |      |
| HETATM | 2360 | C1 | PRP | 98 | 47.562 | 15.535 | 48.035 | 1.00 | 0.00 |
| C      |      |    |     |    |        |        |        |      |      |
| HETATM | 2361 | H2 | PRP | 98 | 47.604 | 15.839 | 46.989 | 1.00 | 0.00 |
| H      |      |    |     |    |        |        |        |      |      |
| HETATM | 2362 | H3 | PRP | 98 | 48.017 | 14.556 | 48.186 | 1.00 | 0.00 |
| H      |      |    |     |    |        |        |        |      |      |
| HETATM | 2363 | C2 | PRP | 98 | 46.043 | 15.597 | 48.451 | 1.00 | 0.00 |
| C      |      |    |     |    |        |        |        |      |      |
| HETATM | 2364 | H4 | PRP | 98 | 45.712 | 16.594 | 48.739 | 1.00 | 0.00 |
| H      |      |    |     |    |        |        |        |      |      |
| HETATM | 2365 | O2 | PRP | 98 | 45.775 | 14.791 | 49.577 | 1.00 | 0.00 |
| O      |      |    |     |    |        |        |        |      |      |
| HETATM | 2366 | H5 | PRP | 98 | 46.110 | 15.152 | 50.401 | 1.00 | 0.00 |
| H      |      |    |     |    |        |        |        |      |      |
| HETATM | 2367 | C3 | PRP | 98 | 45.156 | 15.042 | 47.328 | 1.00 | 0.00 |
| C      |      |    |     |    |        |        |        |      |      |
| HETATM | 2368 | H6 | PRP | 98 | 44.151 | 14.916 | 47.733 | 1.00 | 0.00 |
| H      |      |    |     |    |        |        |        |      |      |
| HETATM | 2369 | H7 | PRP | 98 | 44.944 | 15.845 | 46.623 | 1.00 | 0.00 |
| H      |      |    |     |    |        |        |        |      |      |
| HETATM | 2370 | H8 | PRP | 98 | 45.669 | 14.219 | 46.831 | 1.00 | 0.00 |
| H      |      |    |     |    |        |        |        |      |      |
| HETATM | 2371 | O1 | PRP | 99 | 45.331 | 15.996 | 33.549 | 1.00 | 0.00 |
| O      |      |    |     |    |        |        |        |      |      |
| HETATM | 2372 | H1 | PRP | 99 | 45.575 | 15.911 | 32.625 | 1.00 | 0.00 |
| H      |      |    |     |    |        |        |        |      |      |
| HETATM | 2373 | C1 | PRP | 99 | 45.210 | 17.328 | 34.019 | 1.00 | 0.00 |
| C      |      |    |     |    |        |        |        |      |      |
| HETATM | 2374 | H2 | PRP | 99 | 44.885 | 17.874 | 33.134 | 1.00 | 0.00 |
| H      |      |    |     |    |        |        |        |      |      |
| HETATM | 2375 | H3 | PRP | 99 | 44.451 | 17.534 | 34.773 | 1.00 | 0.00 |
| H      |      |    |     |    |        |        |        |      |      |
| HETATM | 2376 | C2 | PRP | 99 | 46.610 | 17.828 | 34.444 | 1.00 | 0.00 |
| C      |      |    |     |    |        |        |        |      |      |
| HETATM | 2377 | H4 | PRP | 99 | 46.301 | 18.722 | 34.986 | 1.00 | 0.00 |
| H      |      |    |     |    |        |        |        |      |      |
| HETATM | 2378 | O2 | PRP | 99 | 47.456 | 18.033 | 33.320 | 1.00 | 0.00 |
| O      |      |    |     |    |        |        |        |      |      |
| HETATM | 2379 | H5 | PRP | 99 | 48.304 | 18.373 | 33.614 | 1.00 | 0.00 |
| H      |      |    |     |    |        |        |        |      |      |



|        |      |    |     |     |        |        |        |      |      |
|--------|------|----|-----|-----|--------|--------|--------|------|------|
| HETATM | 2380 | C3 | PRP | 99  | 47.195 | 16.965 | 35.533 | 1.00 | 0.00 |
| C      |      |    |     |     |        |        |        |      |      |
| HETATM | 2381 | H6 | PRP | 99  | 46.481 | 16.832 | 36.346 | 1.00 | 0.00 |
| H      |      |    |     |     |        |        |        |      |      |
| HETATM | 2382 | H7 | PRP | 99  | 47.567 | 16.031 | 35.111 | 1.00 | 0.00 |
| H      |      |    |     |     |        |        |        |      |      |
| HETATM | 2383 | H8 | PRP | 99  | 48.097 | 17.466 | 35.885 | 1.00 | 0.00 |
| H      |      |    |     |     |        |        |        |      |      |
| HETATM | 2384 | O1 | PRP | 100 | 28.636 | 11.271 | 41.235 | 1.00 | 0.00 |
| O      |      |    |     |     |        |        |        |      |      |
| HETATM | 2385 | H1 | PRP | 100 | 28.209 | 11.179 | 42.090 | 1.00 | 0.00 |
| H      |      |    |     |     |        |        |        |      |      |
| HETATM | 2386 | C1 | PRP | 100 | 29.243 | 10.031 | 40.793 | 1.00 | 0.00 |
| C      |      |    |     |     |        |        |        |      |      |
| HETATM | 2387 | H2 | PRP | 100 | 30.096 | 9.783  | 41.424 | 1.00 | 0.00 |
| H      |      |    |     |     |        |        |        |      |      |
| HETATM | 2388 | H3 | PRP | 100 | 28.412 | 9.330  | 40.865 | 1.00 | 0.00 |
| H      |      |    |     |     |        |        |        |      |      |
| HETATM | 2389 | C2 | PRP | 100 | 29.651 | 10.126 | 39.307 | 1.00 | 0.00 |
| C      |      |    |     |     |        |        |        |      |      |
| HETATM | 2390 | H4 | PRP | 100 | 30.639 | 10.580 | 39.224 | 1.00 | 0.00 |
| H      |      |    |     |     |        |        |        |      |      |
| HETATM | 2391 | O2 | PRP | 100 | 28.777 | 10.987 | 38.709 | 1.00 | 0.00 |
| O      |      |    |     |     |        |        |        |      |      |
| HETATM | 2392 | H5 | PRP | 100 | 28.239 | 11.287 | 39.445 | 1.00 | 0.00 |
| H      |      |    |     |     |        |        |        |      |      |
| HETATM | 2393 | C3 | PRP | 100 | 29.556 | 8.866  | 38.554 | 1.00 | 0.00 |
| C      |      |    |     |     |        |        |        |      |      |
| HETATM | 2394 | H6 | PRP | 100 | 29.693 | 9.017  | 37.484 | 1.00 | 0.00 |
| H      |      |    |     |     |        |        |        |      |      |
| HETATM | 2395 | H7 | PRP | 100 | 30.338 | 8.186  | 38.891 | 1.00 | 0.00 |
| H      |      |    |     |     |        |        |        |      |      |
| HETATM | 2396 | H8 | PRP | 100 | 28.651 | 8.314  | 38.809 | 1.00 | 0.00 |
| H      |      |    |     |     |        |        |        |      |      |
| HETATM | 2397 | O1 | PRP | 101 | 34.841 | 4.684  | 49.921 | 1.00 | 0.00 |
| O      |      |    |     |     |        |        |        |      |      |
| HETATM | 2398 | H1 | PRP | 101 | 33.949 | 4.611  | 49.572 | 1.00 | 0.00 |
| H      |      |    |     |     |        |        |        |      |      |
| HETATM | 2399 | C1 | PRP | 101 | 34.864 | 4.188  | 51.263 | 1.00 | 0.00 |
| C      |      |    |     |     |        |        |        |      |      |
| HETATM | 2400 | H2 | PRP | 101 | 35.867 | 4.357  | 51.657 | 1.00 | 0.00 |
| H      |      |    |     |     |        |        |        |      |      |
| HETATM | 2401 | H3 | PRP | 101 | 34.228 | 4.712  | 51.976 | 1.00 | 0.00 |
| H      |      |    |     |     |        |        |        |      |      |
| HETATM | 2402 | C2 | PRP | 101 | 34.474 | 2.697  | 51.349 | 1.00 | 0.00 |
| C      |      |    |     |     |        |        |        |      |      |
| HETATM | 2403 | H4 | PRP | 101 | 34.960 | 2.159  | 50.535 | 1.00 | 0.00 |
| H      |      |    |     |     |        |        |        |      |      |
| HETATM | 2404 | O2 | PRP | 101 | 33.125 | 2.550  | 51.168 | 1.00 | 0.00 |
| O      |      |    |     |     |        |        |        |      |      |
| HETATM | 2405 | H5 | PRP | 101 | 32.893 | 1.638  | 51.354 | 1.00 | 0.00 |
| H      |      |    |     |     |        |        |        |      |      |
| HETATM | 2406 | C3 | PRP | 101 | 34.771 | 2.302  | 52.770 | 1.00 | 0.00 |
| C      |      |    |     |     |        |        |        |      |      |
| HETATM | 2407 | H6 | PRP | 101 | 34.143 | 2.902  | 53.429 | 1.00 | 0.00 |
| H      |      |    |     |     |        |        |        |      |      |

|        |      |    |     |     |        |        |        |      |      |
|--------|------|----|-----|-----|--------|--------|--------|------|------|
| HETATM | 2408 | H7 | PRP | 101 | 34.617 | 1.232  | 52.913 | 1.00 | 0.00 |
| H      |      |    |     |     |        |        |        |      |      |
| HETATM | 2409 | H8 | PRP | 101 | 35.815 | 2.581  | 52.917 | 1.00 | 0.00 |
| H      |      |    |     |     |        |        |        |      |      |
| HETATM | 2410 | O1 | PRP | 102 | 38.421 | 4.837  | 41.817 | 1.00 | 0.00 |
| O      |      |    |     |     |        |        |        |      |      |
| HETATM | 2411 | H1 | PRP | 102 | 38.895 | 4.456  | 41.074 | 1.00 | 0.00 |
| H      |      |    |     |     |        |        |        |      |      |
| HETATM | 2412 | C1 | PRP | 102 | 37.572 | 5.873  | 41.252 | 1.00 | 0.00 |
| C      |      |    |     |     |        |        |        |      |      |
| HETATM | 2413 | H2 | PRP | 102 | 36.978 | 5.504  | 40.417 | 1.00 | 0.00 |
| H      |      |    |     |     |        |        |        |      |      |
| HETATM | 2414 | H3 | PRP | 102 | 36.893 | 6.242  | 42.021 | 1.00 | 0.00 |
| H      |      |    |     |     |        |        |        |      |      |
| HETATM | 2415 | C2 | PRP | 102 | 38.460 | 7.025  | 40.722 | 1.00 | 0.00 |
| C      |      |    |     |     |        |        |        |      |      |
| HETATM | 2416 | H4 | PRP | 102 | 39.241 | 6.496  | 40.175 | 1.00 | 0.00 |
| H      |      |    |     |     |        |        |        |      |      |
| HETATM | 2417 | O2 | PRP | 102 | 39.030 | 7.695  | 41.838 | 1.00 | 0.00 |
| O      |      |    |     |     |        |        |        |      |      |
| HETATM | 2418 | H5 | PRP | 102 | 38.970 | 7.052  | 42.549 | 1.00 | 0.00 |
| H      |      |    |     |     |        |        |        |      |      |
| HETATM | 2419 | C3 | PRP | 102 | 37.714 | 8.007  | 39.756 | 1.00 | 0.00 |
| C      |      |    |     |     |        |        |        |      |      |
| HETATM | 2420 | H6 | PRP | 102 | 37.981 | 7.792  | 38.722 | 1.00 | 0.00 |
| H      |      |    |     |     |        |        |        |      |      |
| HETATM | 2421 | H7 | PRP | 102 | 36.646 | 7.850  | 39.907 | 1.00 | 0.00 |
| H      |      |    |     |     |        |        |        |      |      |
| HETATM | 2422 | H8 | PRP | 102 | 38.089 | 9.004  | 39.988 | 1.00 | 0.00 |
| H      |      |    |     |     |        |        |        |      |      |
| HETATM | 2423 | O1 | PRP | 103 | 47.896 | 13.827 | 40.629 | 1.00 | 0.00 |
| O      |      |    |     |     |        |        |        |      |      |
| HETATM | 2424 | H1 | PRP | 103 | 46.938 | 13.883 | 40.591 | 1.00 | 0.00 |
| H      |      |    |     |     |        |        |        |      |      |
| HETATM | 2425 | C1 | PRP | 103 | 48.293 | 13.954 | 41.964 | 1.00 | 0.00 |
| C      |      |    |     |     |        |        |        |      |      |
| HETATM | 2426 | H2 | PRP | 103 | 49.379 | 13.917 | 42.047 | 1.00 | 0.00 |
| H      |      |    |     |     |        |        |        |      |      |
| HETATM | 2427 | H3 | PRP | 103 | 47.924 | 14.939 | 42.253 | 1.00 | 0.00 |
| H      |      |    |     |     |        |        |        |      |      |
| HETATM | 2428 | C2 | PRP | 103 | 47.566 | 12.862 | 42.780 | 1.00 | 0.00 |
| C      |      |    |     |     |        |        |        |      |      |
| HETATM | 2429 | H4 | PRP | 103 | 48.244 | 12.026 | 42.948 | 1.00 | 0.00 |
| H      |      |    |     |     |        |        |        |      |      |
| HETATM | 2430 | O2 | PRP | 103 | 46.358 | 12.425 | 42.241 | 1.00 | 0.00 |
| O      |      |    |     |     |        |        |        |      |      |
| HETATM | 2431 | H5 | PRP | 103 | 46.633 | 11.971 | 41.441 | 1.00 | 0.00 |
| H      |      |    |     |     |        |        |        |      |      |
| HETATM | 2432 | C3 | PRP | 103 | 47.195 | 13.283 | 44.215 | 1.00 | 0.00 |
| C      |      |    |     |     |        |        |        |      |      |
| HETATM | 2433 | H6 | PRP | 103 | 48.069 | 13.623 | 44.770 | 1.00 | 0.00 |
| H      |      |    |     |     |        |        |        |      |      |
| HETATM | 2434 | H7 | PRP | 103 | 46.466 | 14.092 | 44.255 | 1.00 | 0.00 |
| H      |      |    |     |     |        |        |        |      |      |
| HETATM | 2435 | H8 | PRP | 103 | 46.753 | 12.437 | 44.741 | 1.00 | 0.00 |
| H      |      |    |     |     |        |        |        |      |      |

|        |      |    |     |     |        |        |        |      |      |
|--------|------|----|-----|-----|--------|--------|--------|------|------|
| HETATM | 2436 | O1 | PRP | 104 | 41.674 | 23.309 | 37.589 | 1.00 | 0.00 |
| O      |      |    |     |     |        |        |        |      |      |
| HETATM | 2437 | H1 | PRP | 104 | 41.252 | 24.085 | 37.214 | 1.00 | 0.00 |
| H      |      |    |     |     |        |        |        |      |      |
| HETATM | 2438 | C1 | PRP | 104 | 40.738 | 22.278 | 37.453 | 1.00 | 0.00 |
| C      |      |    |     |     |        |        |        |      |      |
| HETATM | 2439 | H2 | PRP | 104 | 40.302 | 22.322 | 36.455 | 1.00 | 0.00 |
| H      |      |    |     |     |        |        |        |      |      |
| HETATM | 2440 | H3 | PRP | 104 | 41.286 | 21.337 | 37.503 | 1.00 | 0.00 |
| H      |      |    |     |     |        |        |        |      |      |
| HETATM | 2441 | C2 | PRP | 104 | 39.672 | 22.439 | 38.507 | 1.00 | 0.00 |
| C      |      |    |     |     |        |        |        |      |      |
| HETATM | 2442 | H4 | PRP | 104 | 39.242 | 23.436 | 38.415 | 1.00 | 0.00 |
| H      |      |    |     |     |        |        |        |      |      |
| HETATM | 2443 | O2 | PRP | 104 | 40.224 | 22.456 | 39.812 | 1.00 | 0.00 |
| O      |      |    |     |     |        |        |        |      |      |
| HETATM | 2444 | H5 | PRP | 104 | 40.334 | 21.546 | 40.097 | 1.00 | 0.00 |
| H      |      |    |     |     |        |        |        |      |      |
| HETATM | 2445 | C3 | PRP | 104 | 38.513 | 21.488 | 38.396 | 1.00 | 0.00 |
| C      |      |    |     |     |        |        |        |      |      |
| HETATM | 2446 | H6 | PRP | 104 | 38.444 | 21.201 | 37.347 | 1.00 | 0.00 |
| H      |      |    |     |     |        |        |        |      |      |
| HETATM | 2447 | H7 | PRP | 104 | 38.576 | 20.675 | 39.119 | 1.00 | 0.00 |
| H      |      |    |     |     |        |        |        |      |      |
| HETATM | 2448 | H8 | PRP | 104 | 37.559 | 21.929 | 38.686 | 1.00 | 0.00 |
| H      |      |    |     |     |        |        |        |      |      |
| HETATM | 2449 | O1 | PRP | 105 | 47.552 | 10.529 | 37.184 | 1.00 | 0.00 |
| O      |      |    |     |     |        |        |        |      |      |
| HETATM | 2450 | H1 | PRP | 105 | 48.143 | 9.773  | 37.154 | 1.00 | 0.00 |
| H      |      |    |     |     |        |        |        |      |      |
| HETATM | 2451 | C1 | PRP | 105 | 48.065 | 11.688 | 36.506 | 1.00 | 0.00 |
| C      |      |    |     |     |        |        |        |      |      |
| HETATM | 2452 | H2 | PRP | 105 | 47.440 | 12.524 | 36.821 | 1.00 | 0.00 |
| H      |      |    |     |     |        |        |        |      |      |
| HETATM | 2453 | H3 | PRP | 105 | 49.015 | 12.095 | 36.852 | 1.00 | 0.00 |
| H      |      |    |     |     |        |        |        |      |      |
| HETATM | 2454 | C2 | PRP | 105 | 48.257 | 11.511 | 34.988 | 1.00 | 0.00 |
| C      |      |    |     |     |        |        |        |      |      |
| HETATM | 2455 | H4 | PRP | 105 | 47.508 | 10.839 | 34.569 | 1.00 | 0.00 |
| H      |      |    |     |     |        |        |        |      |      |
| HETATM | 2456 | O2 | PRP | 105 | 49.616 | 11.136 | 34.621 | 1.00 | 0.00 |
| O      |      |    |     |     |        |        |        |      |      |
| HETATM | 2457 | H5 | PRP | 105 | 50.175 | 11.861 | 34.908 | 1.00 | 0.00 |
| H      |      |    |     |     |        |        |        |      |      |
| HETATM | 2458 | C3 | PRP | 105 | 48.127 | 12.830 | 34.265 | 1.00 | 0.00 |
| C      |      |    |     |     |        |        |        |      |      |
| HETATM | 2459 | H6 | PRP | 105 | 47.957 | 12.673 | 33.200 | 1.00 | 0.00 |
| H      |      |    |     |     |        |        |        |      |      |
| HETATM | 2460 | H7 | PRP | 105 | 47.276 | 13.336 | 34.721 | 1.00 | 0.00 |
| H      |      |    |     |     |        |        |        |      |      |
| HETATM | 2461 | H8 | PRP | 105 | 49.006 | 13.456 | 34.420 | 1.00 | 0.00 |
| H      |      |    |     |     |        |        |        |      |      |
| HETATM | 2462 | O1 | PRP | 106 | 41.822 | 24.640 | 40.529 | 1.00 | 0.00 |
| O      |      |    |     |     |        |        |        |      |      |
| HETATM | 2463 | H1 | PRP | 106 | 41.427 | 23.951 | 39.990 | 1.00 | 0.00 |
| H      |      |    |     |     |        |        |        |      |      |

|        |      |    |     |     |        |        |        |      |      |
|--------|------|----|-----|-----|--------|--------|--------|------|------|
| HETATM | 2464 | C1 | PRP | 106 | 42.845 | 23.988 | 41.197 | 1.00 | 0.00 |
| C      |      |    |     |     |        |        |        |      |      |
| HETATM | 2465 | H2 | PRP | 106 | 43.222 | 24.816 | 41.797 | 1.00 | 0.00 |
| H      |      |    |     |     |        |        |        |      |      |
| HETATM | 2466 | H3 | PRP | 106 | 42.555 | 23.213 | 41.906 | 1.00 | 0.00 |
| H      |      |    |     |     |        |        |        |      |      |
| HETATM | 2467 | C2 | PRP | 106 | 43.913 | 23.391 | 40.204 | 1.00 | 0.00 |
| C      |      |    |     |     |        |        |        |      |      |
| HETATM | 2468 | H4 | PRP | 106 | 44.053 | 24.012 | 39.320 | 1.00 | 0.00 |
| H      |      |    |     |     |        |        |        |      |      |
| HETATM | 2469 | O2 | PRP | 106 | 43.394 | 22.150 | 39.875 | 1.00 | 0.00 |
| O      |      |    |     |     |        |        |        |      |      |
| HETATM | 2470 | H5 | PRP | 106 | 42.750 | 22.331 | 39.186 | 1.00 | 0.00 |
| H      |      |    |     |     |        |        |        |      |      |
| HETATM | 2471 | C3 | PRP | 106 | 45.318 | 23.283 | 40.773 | 1.00 | 0.00 |
| C      |      |    |     |     |        |        |        |      |      |
| HETATM | 2472 | H6 | PRP | 106 | 45.657 | 24.257 | 41.126 | 1.00 | 0.00 |
| H      |      |    |     |     |        |        |        |      |      |
| HETATM | 2473 | H7 | PRP | 106 | 45.382 | 22.708 | 41.697 | 1.00 | 0.00 |
| H      |      |    |     |     |        |        |        |      |      |
| HETATM | 2474 | H8 | PRP | 106 | 45.973 | 22.880 | 40.001 | 1.00 | 0.00 |
| H      |      |    |     |     |        |        |        |      |      |
| HETATM | 2475 | O1 | PRP | 107 | 15.666 | 10.284 | 53.022 | 1.00 | 0.00 |
| O      |      |    |     |     |        |        |        |      |      |
| HETATM | 2476 | H1 | PRP | 107 | 15.813 | 10.557 | 52.114 | 1.00 | 0.00 |
| H      |      |    |     |     |        |        |        |      |      |
| HETATM | 2477 | C1 | PRP | 107 | 16.761 | 9.444  | 53.408 | 1.00 | 0.00 |
| C      |      |    |     |     |        |        |        |      |      |
| HETATM | 2478 | H2 | PRP | 107 | 16.776 | 9.230  | 54.476 | 1.00 | 0.00 |
| H      |      |    |     |     |        |        |        |      |      |
| HETATM | 2479 | H3 | PRP | 107 | 16.778 | 8.585  | 52.737 | 1.00 | 0.00 |
| H      |      |    |     |     |        |        |        |      |      |
| HETATM | 2480 | C2 | PRP | 107 | 18.027 | 10.261 | 53.149 | 1.00 | 0.00 |
| C      |      |    |     |     |        |        |        |      |      |
| HETATM | 2481 | H4 | PRP | 107 | 17.857 | 11.261 | 53.548 | 1.00 | 0.00 |
| H      |      |    |     |     |        |        |        |      |      |
| HETATM | 2482 | O2 | PRP | 107 | 18.326 | 10.233 | 51.818 | 1.00 | 0.00 |
| O      |      |    |     |     |        |        |        |      |      |
| HETATM | 2483 | H5 | PRP | 107 | 18.787 | 9.411  | 51.633 | 1.00 | 0.00 |
| H      |      |    |     |     |        |        |        |      |      |
| HETATM | 2484 | C3 | PRP | 107 | 19.210 | 9.534  | 53.914 | 1.00 | 0.00 |
| C      |      |    |     |     |        |        |        |      |      |
| HETATM | 2485 | H6 | PRP | 107 | 18.978 | 9.464  | 54.977 | 1.00 | 0.00 |
| H      |      |    |     |     |        |        |        |      |      |
| HETATM | 2486 | H7 | PRP | 107 | 19.154 | 8.541  | 53.468 | 1.00 | 0.00 |
| H      |      |    |     |     |        |        |        |      |      |
| HETATM | 2487 | H8 | PRP | 107 | 20.171 | 10.040 | 53.825 | 1.00 | 0.00 |
| H      |      |    |     |     |        |        |        |      |      |
| HETATM | 2488 | O1 | PRP | 108 | 38.377 | 9.103  | 34.758 | 1.00 | 0.00 |
| O      |      |    |     |     |        |        |        |      |      |
| HETATM | 2489 | H1 | PRP | 108 | 38.687 | 9.131  | 35.666 | 1.00 | 0.00 |
| H      |      |    |     |     |        |        |        |      |      |
| HETATM | 2490 | C1 | PRP | 108 | 37.931 | 10.408 | 34.321 | 1.00 | 0.00 |
| C      |      |    |     |     |        |        |        |      |      |
| HETATM | 2491 | H2 | PRP | 108 | 37.058 | 10.596 | 34.946 | 1.00 | 0.00 |
| H      |      |    |     |     |        |        |        |      |      |

|        |      |    |     |     |        |        |        |      |      |
|--------|------|----|-----|-----|--------|--------|--------|------|------|
| HETATM | 2492 | H3 | PRP | 108 | 38.720 | 11.077 | 34.667 | 1.00 | 0.00 |
| H      |      |    |     |     |        |        |        |      |      |
| HETATM | 2493 | C2 | PRP | 108 | 37.635 | 10.460 | 32.818 | 1.00 | 0.00 |
| C      |      |    |     |     |        |        |        |      |      |
| HETATM | 2494 | H4 | PRP | 108 | 37.340 | 11.474 | 32.550 | 1.00 | 0.00 |
| H      |      |    |     |     |        |        |        |      |      |
| HETATM | 2495 | O2 | PRP | 108 | 36.691 | 9.493  | 32.545 | 1.00 | 0.00 |
| O      |      |    |     |     |        |        |        |      |      |
| HETATM | 2496 | H5 | PRP | 108 | 36.855 | 8.786  | 33.174 | 1.00 | 0.00 |
| H      |      |    |     |     |        |        |        |      |      |
| HETATM | 2497 | C3 | PRP | 108 | 38.867 | 10.068 | 32.073 | 1.00 | 0.00 |
| C      |      |    |     |     |        |        |        |      |      |
| HETATM | 2498 | H6 | PRP | 108 | 38.605 | 10.341 | 31.050 | 1.00 | 0.00 |
| H      |      |    |     |     |        |        |        |      |      |
| HETATM | 2499 | H7 | PRP | 108 | 39.713 | 10.709 | 32.319 | 1.00 | 0.00 |
| H      |      |    |     |     |        |        |        |      |      |
| HETATM | 2500 | H8 | PRP | 108 | 39.182 | 9.033  | 32.200 | 1.00 | 0.00 |
| H      |      |    |     |     |        |        |        |      |      |
| HETATM | 2501 | O1 | PRP | 109 | 34.801 | -1.600 | 45.041 | 1.00 | 0.00 |
| O      |      |    |     |     |        |        |        |      |      |
| HETATM | 2502 | H1 | PRP | 109 | 35.391 | -0.938 | 44.675 | 1.00 | 0.00 |
| H      |      |    |     |     |        |        |        |      |      |
| HETATM | 2503 | C1 | PRP | 109 | 33.807 | -0.882 | 45.799 | 1.00 | 0.00 |
| C      |      |    |     |     |        |        |        |      |      |
| HETATM | 2504 | H2 | PRP | 109 | 33.393 | -1.497 | 46.598 | 1.00 | 0.00 |
| H      |      |    |     |     |        |        |        |      |      |
| HETATM | 2505 | H3 | PRP | 109 | 34.325 | -0.071 | 46.311 | 1.00 | 0.00 |
| H      |      |    |     |     |        |        |        |      |      |
| HETATM | 2506 | C2 | PRP | 109 | 32.764 | -0.201 | 44.877 | 1.00 | 0.00 |
| C      |      |    |     |     |        |        |        |      |      |
| HETATM | 2507 | H4 | PRP | 109 | 32.186 | -0.980 | 44.379 | 1.00 | 0.00 |
| H      |      |    |     |     |        |        |        |      |      |
| HETATM | 2508 | O2 | PRP | 109 | 33.323 | 0.653  | 43.947 | 1.00 | 0.00 |
| O      |      |    |     |     |        |        |        |      |      |
| HETATM | 2509 | H5 | PRP | 109 | 33.827 | 0.068  | 43.377 | 1.00 | 0.00 |
| H      |      |    |     |     |        |        |        |      |      |
| HETATM | 2510 | C3 | PRP | 109 | 31.815 | 0.631  | 45.686 | 1.00 | 0.00 |
| C      |      |    |     |     |        |        |        |      |      |
| HETATM | 2511 | H6 | PRP | 109 | 32.388 | 1.163  | 46.446 | 1.00 | 0.00 |
| H      |      |    |     |     |        |        |        |      |      |
| HETATM | 2512 | H7 | PRP | 109 | 31.182 | 1.260  | 45.060 | 1.00 | 0.00 |
| H      |      |    |     |     |        |        |        |      |      |
| HETATM | 2513 | H8 | PRP | 109 | 31.130 | -0.040 | 46.205 | 1.00 | 0.00 |
| H      |      |    |     |     |        |        |        |      |      |
| HETATM | 2514 | O1 | PRP | 110 | 38.218 | 3.038  | 43.727 | 1.00 | 0.00 |
| O      |      |    |     |     |        |        |        |      |      |
| HETATM | 2515 | H1 | PRP | 110 | 38.259 | 3.711  | 43.043 | 1.00 | 0.00 |
| H      |      |    |     |     |        |        |        |      |      |
| HETATM | 2516 | C1 | PRP | 110 | 36.934 | 3.055  | 44.433 | 1.00 | 0.00 |
| C      |      |    |     |     |        |        |        |      |      |
| HETATM | 2517 | H2 | PRP | 110 | 36.817 | 4.105  | 44.699 | 1.00 | 0.00 |
| H      |      |    |     |     |        |        |        |      |      |
| HETATM | 2518 | H3 | PRP | 110 | 36.177 | 2.916  | 43.661 | 1.00 | 0.00 |
| H      |      |    |     |     |        |        |        |      |      |
| HETATM | 2519 | C2 | PRP | 110 | 36.828 | 1.978  | 45.583 | 1.00 | 0.00 |
| C      |      |    |     |     |        |        |        |      |      |

|        |      |    |     |     |        |        |        |      |      |
|--------|------|----|-----|-----|--------|--------|--------|------|------|
| HETATM | 2520 | H4 | PRP | 110 | 37.800 | 1.710  | 45.996 | 1.00 | 0.00 |
| H      |      |    |     |     |        |        |        |      |      |
| HETATM | 2521 | O2 | PRP | 110 | 36.343 | 0.790  | 44.944 | 1.00 | 0.00 |
| O      |      |    |     |     |        |        |        |      |      |
| HETATM | 2522 | H5 | PRP | 110 | 36.843 | 0.633  | 44.140 | 1.00 | 0.00 |
| H      |      |    |     |     |        |        |        |      |      |
| HETATM | 2523 | C3 | PRP | 110 | 35.801 | 2.371  | 46.645 | 1.00 | 0.00 |
| C      |      |    |     |     |        |        |        |      |      |
| HETATM | 2524 | H6 | PRP | 110 | 36.047 | 3.216  | 47.289 | 1.00 | 0.00 |
| H      |      |    |     |     |        |        |        |      |      |
| HETATM | 2525 | H7 | PRP | 110 | 35.045 | 2.900  | 46.065 | 1.00 | 0.00 |
| H      |      |    |     |     |        |        |        |      |      |
| HETATM | 2526 | H8 | PRP | 110 | 35.550 | 1.496  | 47.244 | 1.00 | 0.00 |
| H      |      |    |     |     |        |        |        |      |      |
| HETATM | 2527 | O1 | PRP | 111 | 43.061 | 6.176  | 49.496 | 1.00 | 0.00 |
| O      |      |    |     |     |        |        |        |      |      |
| HETATM | 2528 | H1 | PRP | 111 | 42.113 | 6.138  | 49.346 | 1.00 | 0.00 |
| H      |      |    |     |     |        |        |        |      |      |
| HETATM | 2529 | C1 | PRP | 111 | 43.576 | 7.154  | 48.619 | 1.00 | 0.00 |
| C      |      |    |     |     |        |        |        |      |      |
| HETATM | 2530 | H2 | PRP | 111 | 43.645 | 6.554  | 47.712 | 1.00 | 0.00 |
| H      |      |    |     |     |        |        |        |      |      |
| HETATM | 2531 | H3 | PRP | 111 | 42.864 | 7.967  | 48.472 | 1.00 | 0.00 |
| H      |      |    |     |     |        |        |        |      |      |
| HETATM | 2532 | C2 | PRP | 111 | 44.911 | 7.737  | 49.185 | 1.00 | 0.00 |
| C      |      |    |     |     |        |        |        |      |      |
| HETATM | 2533 | H4 | PRP | 111 | 45.079 | 8.719  | 48.742 | 1.00 | 0.00 |
| H      |      |    |     |     |        |        |        |      |      |
| HETATM | 2534 | O2 | PRP | 111 | 46.009 | 6.939  | 48.954 | 1.00 | 0.00 |
| O      |      |    |     |     |        |        |        |      |      |
| HETATM | 2535 | H5 | PRP | 111 | 45.570 | 6.160  | 48.603 | 1.00 | 0.00 |
| H      |      |    |     |     |        |        |        |      |      |
| HETATM | 2536 | C3 | PRP | 111 | 44.902 | 7.868  | 50.795 | 1.00 | 0.00 |
| C      |      |    |     |     |        |        |        |      |      |
| HETATM | 2537 | H6 | PRP | 111 | 44.938 | 6.848  | 51.179 | 1.00 | 0.00 |
| H      |      |    |     |     |        |        |        |      |      |
| HETATM | 2538 | H7 | PRP | 111 | 45.780 | 8.445  | 51.087 | 1.00 | 0.00 |
| H      |      |    |     |     |        |        |        |      |      |
| HETATM | 2539 | H8 | PRP | 111 | 44.023 | 8.422  | 51.122 | 1.00 | 0.00 |
| H      |      |    |     |     |        |        |        |      |      |
| HETATM | 2540 | O1 | PRP | 112 | 28.385 | 16.177 | 52.622 | 1.00 | 0.00 |
| O      |      |    |     |     |        |        |        |      |      |
| HETATM | 2541 | H1 | PRP | 112 | 29.238 | 15.974 | 53.013 | 1.00 | 0.00 |
| H      |      |    |     |     |        |        |        |      |      |
| HETATM | 2542 | C1 | PRP | 112 | 27.856 | 15.044 | 51.973 | 1.00 | 0.00 |
| C      |      |    |     |     |        |        |        |      |      |
| HETATM | 2543 | H2 | PRP | 112 | 28.398 | 14.899 | 51.038 | 1.00 | 0.00 |
| H      |      |    |     |     |        |        |        |      |      |
| HETATM | 2544 | H3 | PRP | 112 | 28.078 | 14.183 | 52.604 | 1.00 | 0.00 |
| H      |      |    |     |     |        |        |        |      |      |
| HETATM | 2545 | C2 | PRP | 112 | 26.381 | 15.170 | 51.600 | 1.00 | 0.00 |
| C      |      |    |     |     |        |        |        |      |      |
| HETATM | 2546 | H4 | PRP | 112 | 26.057 | 14.308 | 51.016 | 1.00 | 0.00 |
| H      |      |    |     |     |        |        |        |      |      |
| HETATM | 2547 | O2 | PRP | 112 | 26.054 | 16.331 | 50.837 | 1.00 | 0.00 |
| O      |      |    |     |     |        |        |        |      |      |

|        |      |    |     |     |        |        |        |      |      |
|--------|------|----|-----|-----|--------|--------|--------|------|------|
| HETATM | 2548 | H5 | PRP | 112 | 26.204 | 17.056 | 51.450 | 1.00 | 0.00 |
| H      |      |    |     |     |        |        |        |      |      |
| HETATM | 2549 | C3 | PRP | 112 | 25.481 | 15.207 | 52.797 | 1.00 | 0.00 |
| C      |      |    |     |     |        |        |        |      |      |
| HETATM | 2550 | H6 | PRP | 112 | 24.433 | 15.038 | 52.552 | 1.00 | 0.00 |
| H      |      |    |     |     |        |        |        |      |      |
| HETATM | 2551 | H7 | PRP | 112 | 25.724 | 14.415 | 53.505 | 1.00 | 0.00 |
| H      |      |    |     |     |        |        |        |      |      |
| HETATM | 2552 | H8 | PRP | 112 | 25.750 | 16.121 | 53.326 | 1.00 | 0.00 |
| H      |      |    |     |     |        |        |        |      |      |
| HETATM | 2553 | O1 | PRP | 113 | 18.066 | 26.308 | 47.129 | 1.00 | 0.00 |
| O      |      |    |     |     |        |        |        |      |      |
| HETATM | 2554 | H1 | PRP | 113 | 17.905 | 26.549 | 48.044 | 1.00 | 0.00 |
| H      |      |    |     |     |        |        |        |      |      |
| HETATM | 2555 | C1 | PRP | 113 | 17.575 | 24.999 | 47.042 | 1.00 | 0.00 |
| C      |      |    |     |     |        |        |        |      |      |
| HETATM | 2556 | H2 | PRP | 113 | 17.441 | 24.763 | 45.986 | 1.00 | 0.00 |
| H      |      |    |     |     |        |        |        |      |      |
| HETATM | 2557 | H3 | PRP | 113 | 18.350 | 24.361 | 47.465 | 1.00 | 0.00 |
| H      |      |    |     |     |        |        |        |      |      |
| HETATM | 2558 | C2 | PRP | 113 | 16.231 | 24.928 | 47.809 | 1.00 | 0.00 |
| C      |      |    |     |     |        |        |        |      |      |
| HETATM | 2559 | H4 | PRP | 113 | 15.702 | 25.818 | 47.468 | 1.00 | 0.00 |
| H      |      |    |     |     |        |        |        |      |      |
| HETATM | 2560 | O2 | PRP | 113 | 16.464 | 24.918 | 49.231 | 1.00 | 0.00 |
| O      |      |    |     |     |        |        |        |      |      |
| HETATM | 2561 | H5 | PRP | 113 | 15.584 | 25.007 | 49.604 | 1.00 | 0.00 |
| H      |      |    |     |     |        |        |        |      |      |
| HETATM | 2562 | C3 | PRP | 113 | 15.417 | 23.762 | 47.248 | 1.00 | 0.00 |
| C      |      |    |     |     |        |        |        |      |      |
| HETATM | 2563 | H6 | PRP | 113 | 15.874 | 22.836 | 47.597 | 1.00 | 0.00 |
| H      |      |    |     |     |        |        |        |      |      |
| HETATM | 2564 | H7 | PRP | 113 | 14.386 | 23.748 | 47.601 | 1.00 | 0.00 |
| H      |      |    |     |     |        |        |        |      |      |
| HETATM | 2565 | H8 | PRP | 113 | 15.420 | 23.885 | 46.165 | 1.00 | 0.00 |
| H      |      |    |     |     |        |        |        |      |      |
| HETATM | 2566 | O1 | PRP | 114 | 20.659 | 28.271 | 42.353 | 1.00 | 0.00 |
| O      |      |    |     |     |        |        |        |      |      |
| HETATM | 2567 | H1 | PRP | 114 | 21.042 | 27.945 | 43.171 | 1.00 | 0.00 |
| H      |      |    |     |     |        |        |        |      |      |
| HETATM | 2568 | C1 | PRP | 114 | 21.677 | 28.728 | 41.493 | 1.00 | 0.00 |
| C      |      |    |     |     |        |        |        |      |      |
| HETATM | 2569 | H2 | PRP | 114 | 21.299 | 29.508 | 40.831 | 1.00 | 0.00 |
| H      |      |    |     |     |        |        |        |      |      |
| HETATM | 2570 | H3 | PRP | 114 | 22.333 | 29.328 | 42.124 | 1.00 | 0.00 |
| H      |      |    |     |     |        |        |        |      |      |
| HETATM | 2571 | C2 | PRP | 114 | 22.205 | 27.580 | 40.643 | 1.00 | 0.00 |
| C      |      |    |     |     |        |        |        |      |      |
| HETATM | 2572 | H4 | PRP | 114 | 21.303 | 27.245 | 40.131 | 1.00 | 0.00 |
| H      |      |    |     |     |        |        |        |      |      |
| HETATM | 2573 | O2 | PRP | 114 | 22.887 | 26.727 | 41.566 | 1.00 | 0.00 |
| O      |      |    |     |     |        |        |        |      |      |
| HETATM | 2574 | H5 | PRP | 114 | 22.615 | 27.096 | 42.409 | 1.00 | 0.00 |
| H      |      |    |     |     |        |        |        |      |      |
| HETATM | 2575 | C3 | PRP | 114 | 23.149 | 28.018 | 39.566 | 1.00 | 0.00 |
| C      |      |    |     |     |        |        |        |      |      |

|        |      |    |     |     |        |        |        |      |      |
|--------|------|----|-----|-----|--------|--------|--------|------|------|
| HETATM | 2576 | H6 | PRP | 114 | 23.583 | 27.141 | 39.086 | 1.00 | 0.00 |
| H      |      |    |     |     |        |        |        |      |      |
| HETATM | 2577 | H7 | PRP | 114 | 22.565 | 28.644 | 38.891 | 1.00 | 0.00 |
| H      |      |    |     |     |        |        |        |      |      |
| HETATM | 2578 | H8 | PRP | 114 | 23.934 | 28.651 | 39.980 | 1.00 | 0.00 |
| H      |      |    |     |     |        |        |        |      |      |
| HETATM | 2579 | O1 | PRP | 115 | 28.981 | 23.211 | 52.834 | 1.00 | 0.00 |
| O      |      |    |     |     |        |        |        |      |      |
| HETATM | 2580 | H1 | PRP | 115 | 28.553 | 24.051 | 52.652 | 1.00 | 0.00 |
| H      |      |    |     |     |        |        |        |      |      |
| HETATM | 2581 | C1 | PRP | 115 | 28.967 | 22.369 | 51.692 | 1.00 | 0.00 |
| C      |      |    |     |     |        |        |        |      |      |
| HETATM | 2582 | H2 | PRP | 115 | 29.709 | 21.594 | 51.881 | 1.00 | 0.00 |
| H      |      |    |     |     |        |        |        |      |      |
| HETATM | 2583 | H3 | PRP | 115 | 27.952 | 21.972 | 51.649 | 1.00 | 0.00 |
| H      |      |    |     |     |        |        |        |      |      |
| HETATM | 2584 | C2 | PRP | 115 | 29.468 | 23.112 | 50.388 | 1.00 | 0.00 |
| C      |      |    |     |     |        |        |        |      |      |
| HETATM | 2585 | H4 | PRP | 115 | 29.674 | 22.352 | 49.634 | 1.00 | 0.00 |
| H      |      |    |     |     |        |        |        |      |      |
| HETATM | 2586 | O2 | PRP | 115 | 30.570 | 23.960 | 50.719 | 1.00 | 0.00 |
| O      |      |    |     |     |        |        |        |      |      |
| HETATM | 2587 | H5 | PRP | 115 | 30.169 | 24.434 | 51.452 | 1.00 | 0.00 |
| H      |      |    |     |     |        |        |        |      |      |
| HETATM | 2588 | C3 | PRP | 115 | 28.384 | 24.116 | 49.863 | 1.00 | 0.00 |
| C      |      |    |     |     |        |        |        |      |      |
| HETATM | 2589 | H6 | PRP | 115 | 28.168 | 24.872 | 50.618 | 1.00 | 0.00 |
| H      |      |    |     |     |        |        |        |      |      |
| HETATM | 2590 | H7 | PRP | 115 | 28.836 | 24.595 | 48.994 | 1.00 | 0.00 |
| H      |      |    |     |     |        |        |        |      |      |
| HETATM | 2591 | H8 | PRP | 115 | 27.508 | 23.528 | 49.590 | 1.00 | 0.00 |
| H      |      |    |     |     |        |        |        |      |      |
| HETATM | 2592 | O1 | PRP | 116 | 21.617 | 27.091 | 58.140 | 1.00 | 0.00 |
| O      |      |    |     |     |        |        |        |      |      |
| HETATM | 2593 | H1 | PRP | 116 | 21.862 | 26.492 | 58.849 | 1.00 | 0.00 |
| H      |      |    |     |     |        |        |        |      |      |
| HETATM | 2594 | C1 | PRP | 116 | 21.076 | 26.234 | 57.172 | 1.00 | 0.00 |
| C      |      |    |     |     |        |        |        |      |      |
| HETATM | 2595 | H2 | PRP | 116 | 21.939 | 25.855 | 56.625 | 1.00 | 0.00 |
| H      |      |    |     |     |        |        |        |      |      |
| HETATM | 2596 | H3 | PRP | 116 | 20.488 | 25.429 | 57.614 | 1.00 | 0.00 |
| H      |      |    |     |     |        |        |        |      |      |
| HETATM | 2597 | C2 | PRP | 116 | 20.059 | 26.870 | 56.197 | 1.00 | 0.00 |
| C      |      |    |     |     |        |        |        |      |      |
| HETATM | 2598 | H4 | PRP | 116 | 20.479 | 27.859 | 56.009 | 1.00 | 0.00 |
| H      |      |    |     |     |        |        |        |      |      |
| HETATM | 2599 | O2 | PRP | 116 | 18.788 | 26.992 | 56.780 | 1.00 | 0.00 |
| O      |      |    |     |     |        |        |        |      |      |
| HETATM | 2600 | H5 | PRP | 116 | 18.696 | 27.915 | 57.026 | 1.00 | 0.00 |
| H      |      |    |     |     |        |        |        |      |      |
| HETATM | 2601 | C3 | PRP | 116 | 19.871 | 26.050 | 54.904 | 1.00 | 0.00 |
| C      |      |    |     |     |        |        |        |      |      |
| HETATM | 2602 | H6 | PRP | 116 | 20.756 | 26.196 | 54.284 | 1.00 | 0.00 |
| H      |      |    |     |     |        |        |        |      |      |
| HETATM | 2603 | H7 | PRP | 116 | 19.690 | 24.985 | 55.047 | 1.00 | 0.00 |
| H      |      |    |     |     |        |        |        |      |      |



|        |      |    |     |     |        |        |        |      |      |
|--------|------|----|-----|-----|--------|--------|--------|------|------|
| HETATM | 2604 | H8 | PRP | 116 | 19.103 | 26.526 | 54.294 | 1.00 | 0.00 |
| H      |      |    |     |     |        |        |        |      |      |
| HETATM | 2605 | O1 | PRP | 117 | 28.834 | 45.057 | 36.949 | 1.00 | 0.00 |
| O      |      |    |     |     |        |        |        |      |      |
| HETATM | 2606 | H1 | PRP | 117 | 29.751 | 44.881 | 37.174 | 1.00 | 0.00 |
| H      |      |    |     |     |        |        |        |      |      |
| HETATM | 2607 | C1 | PRP | 117 | 27.995 | 44.313 | 37.767 | 1.00 | 0.00 |
| C      |      |    |     |     |        |        |        |      |      |
| HETATM | 2608 | H2 | PRP | 117 | 28.277 | 43.260 | 37.787 | 1.00 | 0.00 |
| H      |      |    |     |     |        |        |        |      |      |
| HETATM | 2609 | H3 | PRP | 117 | 28.049 | 44.782 | 38.749 | 1.00 | 0.00 |
| H      |      |    |     |     |        |        |        |      |      |
| HETATM | 2610 | C2 | PRP | 117 | 26.577 | 44.466 | 37.252 | 1.00 | 0.00 |
| C      |      |    |     |     |        |        |        |      |      |
| HETATM | 2611 | H4 | PRP | 117 | 26.491 | 44.019 | 36.262 | 1.00 | 0.00 |
| H      |      |    |     |     |        |        |        |      |      |
| HETATM | 2612 | O2 | PRP | 117 | 26.341 | 45.816 | 37.061 | 1.00 | 0.00 |
| O      |      |    |     |     |        |        |        |      |      |
| HETATM | 2613 | H5 | PRP | 117 | 27.108 | 46.107 | 36.562 | 1.00 | 0.00 |
| H      |      |    |     |     |        |        |        |      |      |
| HETATM | 2614 | C3 | PRP | 117 | 25.587 | 43.760 | 38.145 | 1.00 | 0.00 |
| C      |      |    |     |     |        |        |        |      |      |
| HETATM | 2615 | H6 | PRP | 117 | 25.830 | 43.863 | 39.203 | 1.00 | 0.00 |
| H      |      |    |     |     |        |        |        |      |      |
| HETATM | 2616 | H7 | PRP | 117 | 24.620 | 44.219 | 37.939 | 1.00 | 0.00 |
| H      |      |    |     |     |        |        |        |      |      |
| HETATM | 2617 | H8 | PRP | 117 | 25.515 | 42.705 | 37.879 | 1.00 | 0.00 |
| H      |      |    |     |     |        |        |        |      |      |
| HETATM | 2618 | O1 | PRP | 118 | 34.525 | 25.894 | 32.363 | 1.00 | 0.00 |
| O      |      |    |     |     |        |        |        |      |      |
| HETATM | 2619 | H1 | PRP | 118 | 34.563 | 24.952 | 32.545 | 1.00 | 0.00 |
| H      |      |    |     |     |        |        |        |      |      |
| HETATM | 2620 | C1 | PRP | 118 | 33.561 | 25.946 | 31.424 | 1.00 | 0.00 |
| C      |      |    |     |     |        |        |        |      |      |
| HETATM | 2621 | H2 | PRP | 118 | 33.586 | 25.151 | 30.678 | 1.00 | 0.00 |
| H      |      |    |     |     |        |        |        |      |      |
| HETATM | 2622 | H3 | PRP | 118 | 32.574 | 25.852 | 31.877 | 1.00 | 0.00 |
| H      |      |    |     |     |        |        |        |      |      |
| HETATM | 2623 | C2 | PRP | 118 | 33.707 | 27.180 | 30.548 | 1.00 | 0.00 |
| C      |      |    |     |     |        |        |        |      |      |
| HETATM | 2624 | H4 | PRP | 118 | 33.036 | 27.144 | 29.690 | 1.00 | 0.00 |
| H      |      |    |     |     |        |        |        |      |      |
| HETATM | 2625 | O2 | PRP | 118 | 35.007 | 27.368 | 30.066 | 1.00 | 0.00 |
| O      |      |    |     |     |        |        |        |      |      |
| HETATM | 2626 | H5 | PRP | 118 | 35.525 | 26.722 | 30.552 | 1.00 | 0.00 |
| H      |      |    |     |     |        |        |        |      |      |
| HETATM | 2627 | C3 | PRP | 118 | 33.294 | 28.432 | 31.301 | 1.00 | 0.00 |
| C      |      |    |     |     |        |        |        |      |      |
| HETATM | 2628 | H6 | PRP | 118 | 33.691 | 29.279 | 30.741 | 1.00 | 0.00 |
| H      |      |    |     |     |        |        |        |      |      |
| HETATM | 2629 | H7 | PRP | 118 | 32.221 | 28.398 | 31.485 | 1.00 | 0.00 |
| H      |      |    |     |     |        |        |        |      |      |
| HETATM | 2630 | H8 | PRP | 118 | 33.757 | 28.449 | 32.287 | 1.00 | 0.00 |
| H      |      |    |     |     |        |        |        |      |      |
| HETATM | 2631 | O1 | PRP | 119 | 22.658 | 17.552 | 42.046 | 1.00 | 0.00 |
| O      |      |    |     |     |        |        |        |      |      |

|        |      |    |     |     |        |        |        |      |      |
|--------|------|----|-----|-----|--------|--------|--------|------|------|
| HETATM | 2632 | H1 | PRP | 119 | 23.471 | 18.043 | 42.186 | 1.00 | 0.00 |
| H      |      |    |     |     |        |        |        |      |      |
| HETATM | 2633 | C1 | PRP | 119 | 21.669 | 18.488 | 42.365 | 1.00 | 0.00 |
| C      |      |    |     |     |        |        |        |      |      |
| HETATM | 2634 | H2 | PRP | 119 | 21.999 | 18.808 | 43.353 | 1.00 | 0.00 |
| H      |      |    |     |     |        |        |        |      |      |
| HETATM | 2635 | H3 | PRP | 119 | 21.673 | 19.347 | 41.694 | 1.00 | 0.00 |
| H      |      |    |     |     |        |        |        |      |      |
| HETATM | 2636 | C2 | PRP | 119 | 20.236 | 17.922 | 42.479 | 1.00 | 0.00 |
| C      |      |    |     |     |        |        |        |      |      |
| HETATM | 2637 | H4 | PRP | 119 | 20.208 | 17.178 | 43.275 | 1.00 | 0.00 |
| H      |      |    |     |     |        |        |        |      |      |
| HETATM | 2638 | O2 | PRP | 119 | 20.041 | 17.397 | 41.210 | 1.00 | 0.00 |
| O      |      |    |     |     |        |        |        |      |      |
| HETATM | 2639 | H5 | PRP | 119 | 20.865 | 17.090 | 40.824 | 1.00 | 0.00 |
| H      |      |    |     |     |        |        |        |      |      |
| HETATM | 2640 | C3 | PRP | 119 | 19.331 | 19.103 | 42.839 | 1.00 | 0.00 |
| C      |      |    |     |     |        |        |        |      |      |
| HETATM | 2641 | H6 | PRP | 119 | 19.754 | 19.659 | 43.676 | 1.00 | 0.00 |
| H      |      |    |     |     |        |        |        |      |      |
| HETATM | 2642 | H7 | PRP | 119 | 19.223 | 19.688 | 41.926 | 1.00 | 0.00 |
| H      |      |    |     |     |        |        |        |      |      |
| HETATM | 2643 | H8 | PRP | 119 | 18.354 | 18.686 | 43.083 | 1.00 | 0.00 |
| H      |      |    |     |     |        |        |        |      |      |
| HETATM | 2644 | O1 | PRP | 120 | 26.143 | 19.696 | 31.078 | 1.00 | 0.00 |
| O      |      |    |     |     |        |        |        |      |      |
| HETATM | 2645 | H1 | PRP | 120 | 25.245 | 19.618 | 30.748 | 1.00 | 0.00 |
| H      |      |    |     |     |        |        |        |      |      |
| HETATM | 2646 | C1 | PRP | 120 | 27.096 | 19.133 | 30.137 | 1.00 | 0.00 |
| C      |      |    |     |     |        |        |        |      |      |
| HETATM | 2647 | H2 | PRP | 120 | 27.204 | 18.050 | 30.183 | 1.00 | 0.00 |
| H      |      |    |     |     |        |        |        |      |      |
| HETATM | 2648 | H3 | PRP | 120 | 26.793 | 19.409 | 29.127 | 1.00 | 0.00 |
| H      |      |    |     |     |        |        |        |      |      |
| HETATM | 2649 | C2 | PRP | 120 | 28.548 | 19.666 | 30.372 | 1.00 | 0.00 |
| C      |      |    |     |     |        |        |        |      |      |
| HETATM | 2650 | H4 | PRP | 120 | 29.350 | 19.006 | 30.042 | 1.00 | 0.00 |
| H      |      |    |     |     |        |        |        |      |      |
| HETATM | 2651 | O2 | PRP | 120 | 28.678 | 19.868 | 31.739 | 1.00 | 0.00 |
| O      |      |    |     |     |        |        |        |      |      |
| HETATM | 2652 | H5 | PRP | 120 | 27.982 | 20.428 | 32.091 | 1.00 | 0.00 |
| H      |      |    |     |     |        |        |        |      |      |
| HETATM | 2653 | C3 | PRP | 120 | 28.630 | 20.950 | 29.442 | 1.00 | 0.00 |
| C      |      |    |     |     |        |        |        |      |      |
| HETATM | 2654 | H6 | PRP | 120 | 27.734 | 21.546 | 29.620 | 1.00 | 0.00 |
| H      |      |    |     |     |        |        |        |      |      |
| HETATM | 2655 | H7 | PRP | 120 | 29.571 | 21.466 | 29.628 | 1.00 | 0.00 |
| H      |      |    |     |     |        |        |        |      |      |
| HETATM | 2656 | H8 | PRP | 120 | 28.571 | 20.632 | 28.401 | 1.00 | 0.00 |
| H      |      |    |     |     |        |        |        |      |      |
| HETATM | 2657 | O1 | PRP | 121 | 28.763 | 16.203 | 41.845 | 1.00 | 0.00 |
| O      |      |    |     |     |        |        |        |      |      |
| HETATM | 2658 | H1 | PRP | 121 | 27.861 | 16.527 | 41.794 | 1.00 | 0.00 |
| H      |      |    |     |     |        |        |        |      |      |
| HETATM | 2659 | C1 | PRP | 121 | 28.615 | 15.154 | 40.929 | 1.00 | 0.00 |
| C      |      |    |     |     |        |        |        |      |      |

|        |      |    |     |     |        |        |        |      |      |
|--------|------|----|-----|-----|--------|--------|--------|------|------|
| HETATM | 2660 | H2 | PRP | 121 | 29.578 | 14.830 | 40.535 | 1.00 | 0.00 |
| H      |      |    |     |     |        |        |        |      |      |
| HETATM | 2661 | H3 | PRP | 121 | 28.163 | 14.314 | 41.458 | 1.00 | 0.00 |
| H      |      |    |     |     |        |        |        |      |      |
| HETATM | 2662 | C2 | PRP | 121 | 27.606 | 15.680 | 39.977 | 1.00 | 0.00 |
| C      |      |    |     |     |        |        |        |      |      |
| HETATM | 2663 | H4 | PRP | 121 | 28.051 | 16.411 | 39.302 | 1.00 | 0.00 |
| H      |      |    |     |     |        |        |        |      |      |
| HETATM | 2664 | O2 | PRP | 121 | 26.516 | 16.221 | 40.668 | 1.00 | 0.00 |
| O      |      |    |     |     |        |        |        |      |      |
| HETATM | 2665 | H5 | PRP | 121 | 25.726 | 15.692 | 40.536 | 1.00 | 0.00 |
| H      |      |    |     |     |        |        |        |      |      |
| HETATM | 2666 | C3 | PRP | 121 | 26.953 | 14.635 | 39.084 | 1.00 | 0.00 |
| C      |      |    |     |     |        |        |        |      |      |
| HETATM | 2667 | H6 | PRP | 121 | 26.176 | 15.066 | 38.453 | 1.00 | 0.00 |
| H      |      |    |     |     |        |        |        |      |      |
| HETATM | 2668 | H7 | PRP | 121 | 27.652 | 14.059 | 38.478 | 1.00 | 0.00 |
| H      |      |    |     |     |        |        |        |      |      |
| HETATM | 2669 | H8 | PRP | 121 | 26.484 | 13.841 | 39.664 | 1.00 | 0.00 |
| H      |      |    |     |     |        |        |        |      |      |
| HETATM | 2670 | O1 | PRP | 122 | 37.465 | 24.970 | 38.410 | 1.00 | 0.00 |
| O      |      |    |     |     |        |        |        |      |      |
| HETATM | 2671 | H1 | PRP | 122 | 37.570 | 25.425 | 37.571 | 1.00 | 0.00 |
| H      |      |    |     |     |        |        |        |      |      |
| HETATM | 2672 | C1 | PRP | 122 | 36.263 | 25.481 | 38.917 | 1.00 | 0.00 |
| C      |      |    |     |     |        |        |        |      |      |
| HETATM | 2673 | H2 | PRP | 122 | 35.505 | 25.564 | 38.139 | 1.00 | 0.00 |
| H      |      |    |     |     |        |        |        |      |      |
| HETATM | 2674 | H3 | PRP | 122 | 35.924 | 24.712 | 39.612 | 1.00 | 0.00 |
| H      |      |    |     |     |        |        |        |      |      |
| HETATM | 2675 | C2 | PRP | 122 | 36.646 | 26.754 | 39.625 | 1.00 | 0.00 |
| C      |      |    |     |     |        |        |        |      |      |
| HETATM | 2676 | H4 | PRP | 122 | 37.549 | 27.120 | 39.137 | 1.00 | 0.00 |
| H      |      |    |     |     |        |        |        |      |      |
| HETATM | 2677 | O2 | PRP | 122 | 36.860 | 26.332 | 41.009 | 1.00 | 0.00 |
| O      |      |    |     |     |        |        |        |      |      |
| HETATM | 2678 | H5 | PRP | 122 | 37.492 | 25.611 | 40.958 | 1.00 | 0.00 |
| H      |      |    |     |     |        |        |        |      |      |
| HETATM | 2679 | C3 | PRP | 122 | 35.592 | 27.872 | 39.567 | 1.00 | 0.00 |
| C      |      |    |     |     |        |        |        |      |      |
| HETATM | 2680 | H6 | PRP | 122 | 34.601 | 27.519 | 39.851 | 1.00 | 0.00 |
| H      |      |    |     |     |        |        |        |      |      |
| HETATM | 2681 | H7 | PRP | 122 | 35.911 | 28.818 | 40.006 | 1.00 | 0.00 |
| H      |      |    |     |     |        |        |        |      |      |
| HETATM | 2682 | H8 | PRP | 122 | 35.359 | 27.968 | 38.507 | 1.00 | 0.00 |
| H      |      |    |     |     |        |        |        |      |      |
| HETATM | 2683 | O1 | PRP | 123 | 27.397 | 34.685 | 31.819 | 1.00 | 0.00 |
| O      |      |    |     |     |        |        |        |      |      |
| HETATM | 2684 | H1 | PRP | 123 | 26.804 | 35.352 | 32.173 | 1.00 | 0.00 |
| H      |      |    |     |     |        |        |        |      |      |
| HETATM | 2685 | C1 | PRP | 123 | 27.734 | 35.056 | 30.533 | 1.00 | 0.00 |
| C      |      |    |     |     |        |        |        |      |      |
| HETATM | 2686 | H2 | PRP | 123 | 28.628 | 34.491 | 30.266 | 1.00 | 0.00 |
| H      |      |    |     |     |        |        |        |      |      |
| HETATM | 2687 | H3 | PRP | 123 | 26.828 | 34.918 | 29.942 | 1.00 | 0.00 |
| H      |      |    |     |     |        |        |        |      |      |

|        |      |    |     |     |        |        |        |      |      |
|--------|------|----|-----|-----|--------|--------|--------|------|------|
| HETATM | 2688 | C2 | PRP | 123 | 28.185 | 36.560 | 30.364 | 1.00 | 0.00 |
| C      |      |    |     |     |        |        |        |      |      |
| HETATM | 2689 | H4 | PRP | 123 | 28.045 | 36.804 | 29.311 | 1.00 | 0.00 |
| H      |      |    |     |     |        |        |        |      |      |
| HETATM | 2690 | O2 | PRP | 123 | 29.509 | 36.859 | 30.745 | 1.00 | 0.00 |
| O      |      |    |     |     |        |        |        |      |      |
| HETATM | 2691 | H5 | PRP | 123 | 30.016 | 36.059 | 30.592 | 1.00 | 0.00 |
| H      |      |    |     |     |        |        |        |      |      |
| HETATM | 2692 | C3 | PRP | 123 | 27.259 | 37.534 | 31.109 | 1.00 | 0.00 |
| C      |      |    |     |     |        |        |        |      |      |
| HETATM | 2693 | H6 | PRP | 123 | 26.239 | 37.172 | 30.983 | 1.00 | 0.00 |
| H      |      |    |     |     |        |        |        |      |      |
| HETATM | 2694 | H7 | PRP | 123 | 27.420 | 37.504 | 32.187 | 1.00 | 0.00 |
| H      |      |    |     |     |        |        |        |      |      |
| HETATM | 2695 | H8 | PRP | 123 | 27.435 | 38.528 | 30.697 | 1.00 | 0.00 |
| H      |      |    |     |     |        |        |        |      |      |
| HETATM | 2696 | O1 | PRP | 124 | 19.531 | 10.026 | 43.277 | 1.00 | 0.00 |
| O      |      |    |     |     |        |        |        |      |      |
| HETATM | 2697 | H1 | PRP | 124 | 19.649 | 10.964 | 43.445 | 1.00 | 0.00 |
| H      |      |    |     |     |        |        |        |      |      |
| HETATM | 2698 | C1 | PRP | 124 | 20.331 | 9.685  | 42.181 | 1.00 | 0.00 |
| C      |      |    |     |     |        |        |        |      |      |
| HETATM | 2699 | H2 | PRP | 124 | 20.031 | 10.140 | 41.237 | 1.00 | 0.00 |
| H      |      |    |     |     |        |        |        |      |      |
| HETATM | 2700 | H3 | PRP | 124 | 21.365 | 9.946  | 42.403 | 1.00 | 0.00 |
| H      |      |    |     |     |        |        |        |      |      |
| HETATM | 2701 | C2 | PRP | 124 | 20.250 | 8.166  | 42.206 | 1.00 | 0.00 |
| C      |      |    |     |     |        |        |        |      |      |
| HETATM | 2702 | H4 | PRP | 124 | 19.230 | 7.847  | 42.421 | 1.00 | 0.00 |
| H      |      |    |     |     |        |        |        |      |      |
| HETATM | 2703 | O2 | PRP | 124 | 21.104 | 7.609  | 43.146 | 1.00 | 0.00 |
| O      |      |    |     |     |        |        |        |      |      |
| HETATM | 2704 | H5 | PRP | 124 | 20.762 | 7.881  | 44.001 | 1.00 | 0.00 |
| H      |      |    |     |     |        |        |        |      |      |
| HETATM | 2705 | C3 | PRP | 124 | 20.470 | 7.559  | 40.891 | 1.00 | 0.00 |
| C      |      |    |     |     |        |        |        |      |      |
| HETATM | 2706 | H6 | PRP | 124 | 20.780 | 6.523  | 41.025 | 1.00 | 0.00 |
| H      |      |    |     |     |        |        |        |      |      |
| HETATM | 2707 | H7 | PRP | 124 | 19.551 | 7.643  | 40.312 | 1.00 | 0.00 |
| H      |      |    |     |     |        |        |        |      |      |
| HETATM | 2708 | H8 | PRP | 124 | 21.280 | 8.011  | 40.319 | 1.00 | 0.00 |
| H      |      |    |     |     |        |        |        |      |      |
| HETATM | 2709 | O1 | PRP | 125 | 28.349 | 16.019 | 47.547 | 1.00 | 0.00 |
| O      |      |    |     |     |        |        |        |      |      |
| HETATM | 2710 | H1 | PRP | 125 | 28.201 | 16.625 | 46.817 | 1.00 | 0.00 |
| H      |      |    |     |     |        |        |        |      |      |
| HETATM | 2711 | C1 | PRP | 125 | 28.809 | 16.848 | 48.579 | 1.00 | 0.00 |
| C      |      |    |     |     |        |        |        |      |      |
| HETATM | 2712 | H2 | PRP | 125 | 28.765 | 16.296 | 49.517 | 1.00 | 0.00 |
| H      |      |    |     |     |        |        |        |      |      |
| HETATM | 2713 | H3 | PRP | 125 | 29.770 | 17.305 | 48.341 | 1.00 | 0.00 |
| H      |      |    |     |     |        |        |        |      |      |
| HETATM | 2714 | C2 | PRP | 125 | 27.824 | 17.921 | 48.768 | 1.00 | 0.00 |
| C      |      |    |     |     |        |        |        |      |      |
| HETATM | 2715 | H4 | PRP | 125 | 26.902 | 17.380 | 48.979 | 1.00 | 0.00 |
| H      |      |    |     |     |        |        |        |      |      |

|        |      |    |     |     |        |        |        |      |      |
|--------|------|----|-----|-----|--------|--------|--------|------|------|
| HETATM | 2716 | O2 | PRP | 125 | 27.834 | 18.726 | 47.586 | 1.00 | 0.00 |
| O      |      |    |     |     |        |        |        |      |      |
| HETATM | 2717 | H5 | PRP | 125 | 27.750 | 19.653 | 47.818 | 1.00 | 0.00 |
| H      |      |    |     |     |        |        |        |      |      |
| HETATM | 2718 | C3 | PRP | 125 | 28.364 | 18.803 | 49.896 | 1.00 | 0.00 |
| C      |      |    |     |     |        |        |        |      |      |
| HETATM | 2719 | H6 | PRP | 125 | 29.317 | 19.132 | 49.483 | 1.00 | 0.00 |
| H      |      |    |     |     |        |        |        |      |      |
| HETATM | 2720 | H7 | PRP | 125 | 27.716 | 19.674 | 49.995 | 1.00 | 0.00 |
| H      |      |    |     |     |        |        |        |      |      |
| HETATM | 2721 | H8 | PRP | 125 | 28.549 | 18.172 | 50.765 | 1.00 | 0.00 |
| H      |      |    |     |     |        |        |        |      |      |
| HETATM | 2722 | O1 | PRP | 126 | 20.410 | 15.297 | 44.907 | 1.00 | 0.00 |
| O      |      |    |     |     |        |        |        |      |      |
| HETATM | 2723 | H1 | PRP | 126 | 20.518 | 15.986 | 45.566 | 1.00 | 0.00 |
| H      |      |    |     |     |        |        |        |      |      |
| HETATM | 2724 | C1 | PRP | 126 | 20.481 | 14.006 | 45.458 | 1.00 | 0.00 |
| C      |      |    |     |     |        |        |        |      |      |
| HETATM | 2725 | H2 | PRP | 126 | 21.502 | 13.624 | 45.462 | 1.00 | 0.00 |
| H      |      |    |     |     |        |        |        |      |      |
| HETATM | 2726 | H3 | PRP | 126 | 20.131 | 14.271 | 46.456 | 1.00 | 0.00 |
| H      |      |    |     |     |        |        |        |      |      |
| HETATM | 2727 | C2 | PRP | 126 | 19.409 | 12.943 | 45.017 | 1.00 | 0.00 |
| C      |      |    |     |     |        |        |        |      |      |
| HETATM | 2728 | H4 | PRP | 126 | 19.858 | 11.994 | 45.310 | 1.00 | 0.00 |
| H      |      |    |     |     |        |        |        |      |      |
| HETATM | 2729 | O2 | PRP | 126 | 19.550 | 12.797 | 43.681 | 1.00 | 0.00 |
| O      |      |    |     |     |        |        |        |      |      |
| HETATM | 2730 | H5 | PRP | 126 | 19.527 | 13.644 | 43.229 | 1.00 | 0.00 |
| H      |      |    |     |     |        |        |        |      |      |
| HETATM | 2731 | C3 | PRP | 126 | 17.936 | 13.089 | 45.513 | 1.00 | 0.00 |
| C      |      |    |     |     |        |        |        |      |      |
| HETATM | 2732 | H6 | PRP | 126 | 17.580 | 14.109 | 45.365 | 1.00 | 0.00 |
| H      |      |    |     |     |        |        |        |      |      |
| HETATM | 2733 | H7 | PRP | 126 | 17.396 | 12.385 | 44.881 | 1.00 | 0.00 |
| H      |      |    |     |     |        |        |        |      |      |
| HETATM | 2734 | H8 | PRP | 126 | 17.918 | 12.759 | 46.552 | 1.00 | 0.00 |
| H      |      |    |     |     |        |        |        |      |      |
| HETATM | 2735 | O1 | PRP | 127 | 38.072 | 24.543 | 34.393 | 1.00 | 0.00 |
| O      |      |    |     |     |        |        |        |      |      |
| HETATM | 2736 | H1 | PRP | 127 | 38.390 | 24.990 | 33.605 | 1.00 | 0.00 |
| H      |      |    |     |     |        |        |        |      |      |
| HETATM | 2737 | C1 | PRP | 127 | 36.878 | 25.127 | 34.871 | 1.00 | 0.00 |
| C      |      |    |     |     |        |        |        |      |      |
| HETATM | 2738 | H2 | PRP | 127 | 36.143 | 24.834 | 34.122 | 1.00 | 0.00 |
| H      |      |    |     |     |        |        |        |      |      |
| HETATM | 2739 | H3 | PRP | 127 | 36.534 | 24.618 | 35.772 | 1.00 | 0.00 |
| H      |      |    |     |     |        |        |        |      |      |
| HETATM | 2740 | C2 | PRP | 127 | 36.942 | 26.619 | 35.119 | 1.00 | 0.00 |
| C      |      |    |     |     |        |        |        |      |      |
| HETATM | 2741 | H4 | PRP | 127 | 37.475 | 27.126 | 34.315 | 1.00 | 0.00 |
| H      |      |    |     |     |        |        |        |      |      |
| HETATM | 2742 | O2 | PRP | 127 | 37.643 | 26.964 | 36.257 | 1.00 | 0.00 |
| O      |      |    |     |     |        |        |        |      |      |
| HETATM | 2743 | H5 | PRP | 127 | 37.605 | 27.917 | 36.366 | 1.00 | 0.00 |
| H      |      |    |     |     |        |        |        |      |      |

|        |      |    |     |     |        |        |        |      |      |
|--------|------|----|-----|-----|--------|--------|--------|------|------|
| HETATM | 2744 | C3 | PRP | 127 | 35.653 | 27.273 | 35.326 | 1.00 | 0.00 |
| C      |      |    |     |     |        |        |        |      |      |
| HETATM | 2745 | H6 | PRP | 127 | 35.018 | 27.224 | 34.441 | 1.00 | 0.00 |
| H      |      |    |     |     |        |        |        |      |      |
| HETATM | 2746 | H7 | PRP | 127 | 35.075 | 26.746 | 36.086 | 1.00 | 0.00 |
| H      |      |    |     |     |        |        |        |      |      |
| HETATM | 2747 | H8 | PRP | 127 | 35.598 | 28.321 | 35.619 | 1.00 | 0.00 |
| H      |      |    |     |     |        |        |        |      |      |
| HETATM | 2748 | O1 | PRP | 128 | 37.261 | 23.981 | 44.113 | 1.00 | 0.00 |
| O      |      |    |     |     |        |        |        |      |      |
| HETATM | 2749 | H1 | PRP | 128 | 36.903 | 23.793 | 43.242 | 1.00 | 0.00 |
| H      |      |    |     |     |        |        |        |      |      |
| HETATM | 2750 | C1 | PRP | 128 | 38.396 | 24.731 | 43.824 | 1.00 | 0.00 |
| C      |      |    |     |     |        |        |        |      |      |
| HETATM | 2751 | H2 | PRP | 128 | 38.161 | 25.757 | 43.539 | 1.00 | 0.00 |
| H      |      |    |     |     |        |        |        |      |      |
| HETATM | 2752 | H3 | PRP | 128 | 38.906 | 24.788 | 44.786 | 1.00 | 0.00 |
| H      |      |    |     |     |        |        |        |      |      |
| HETATM | 2753 | C2 | PRP | 128 | 39.289 | 24.074 | 42.729 | 1.00 | 0.00 |
| C      |      |    |     |     |        |        |        |      |      |
| HETATM | 2754 | H4 | PRP | 128 | 40.192 | 24.682 | 42.774 | 1.00 | 0.00 |
| H      |      |    |     |     |        |        |        |      |      |
| HETATM | 2755 | O2 | PRP | 128 | 38.717 | 24.345 | 41.438 | 1.00 | 0.00 |
| O      |      |    |     |     |        |        |        |      |      |
| HETATM | 2756 | H5 | PRP | 128 | 39.103 | 23.713 | 40.827 | 1.00 | 0.00 |
| H      |      |    |     |     |        |        |        |      |      |
| HETATM | 2757 | C3 | PRP | 128 | 39.546 | 22.573 | 42.997 | 1.00 | 0.00 |
| C      |      |    |     |     |        |        |        |      |      |
| HETATM | 2758 | H6 | PRP | 128 | 39.626 | 22.490 | 44.081 | 1.00 | 0.00 |
| H      |      |    |     |     |        |        |        |      |      |
| HETATM | 2759 | H7 | PRP | 128 | 38.740 | 22.037 | 42.496 | 1.00 | 0.00 |
| H      |      |    |     |     |        |        |        |      |      |
| HETATM | 2760 | H8 | PRP | 128 | 40.448 | 22.296 | 42.452 | 1.00 | 0.00 |
| H      |      |    |     |     |        |        |        |      |      |
| HETATM | 2761 | O1 | PRP | 129 | 17.899 | 28.465 | 41.768 | 1.00 | 0.00 |
| O      |      |    |     |     |        |        |        |      |      |
| HETATM | 2762 | H1 | PRP | 129 | 18.780 | 28.349 | 42.131 | 1.00 | 0.00 |
| H      |      |    |     |     |        |        |        |      |      |
| HETATM | 2763 | C1 | PRP | 129 | 17.324 | 27.220 | 42.026 | 1.00 | 0.00 |
| C      |      |    |     |     |        |        |        |      |      |
| HETATM | 2764 | H2 | PRP | 129 | 16.476 | 26.939 | 41.400 | 1.00 | 0.00 |
| H      |      |    |     |     |        |        |        |      |      |
| HETATM | 2765 | H3 | PRP | 129 | 17.963 | 26.353 | 41.860 | 1.00 | 0.00 |
| H      |      |    |     |     |        |        |        |      |      |
| HETATM | 2766 | C2 | PRP | 129 | 16.968 | 27.209 | 43.497 | 1.00 | 0.00 |
| C      |      |    |     |     |        |        |        |      |      |
| HETATM | 2767 | H4 | PRP | 129 | 16.366 | 28.055 | 43.829 | 1.00 | 0.00 |
| H      |      |    |     |     |        |        |        |      |      |
| HETATM | 2768 | O2 | PRP | 129 | 18.209 | 27.135 | 44.243 | 1.00 | 0.00 |
| O      |      |    |     |     |        |        |        |      |      |
| HETATM | 2769 | H5 | PRP | 129 | 18.005 | 26.962 | 45.166 | 1.00 | 0.00 |
| H      |      |    |     |     |        |        |        |      |      |
| HETATM | 2770 | C3 | PRP | 129 | 16.118 | 25.972 | 43.838 | 1.00 | 0.00 |
| C      |      |    |     |     |        |        |        |      |      |
| HETATM | 2771 | H6 | PRP | 129 | 15.310 | 25.844 | 43.118 | 1.00 | 0.00 |
| H      |      |    |     |     |        |        |        |      |      |

|        |      |    |     |     |        |        |        |      |      |
|--------|------|----|-----|-----|--------|--------|--------|------|------|
| HETATM | 2772 | H7 | PRP | 129 | 16.734 | 25.084 | 43.983 | 1.00 | 0.00 |
| H      |      |    |     |     |        |        |        |      |      |
| HETATM | 2773 | H8 | PRP | 129 | 15.589 | 26.229 | 44.755 | 1.00 | 0.00 |
| H      |      |    |     |     |        |        |        |      |      |
| HETATM | 2774 | O1 | PRP | 130 | 30.107 | 15.129 | 32.454 | 1.00 | 0.00 |
| O      |      |    |     |     |        |        |        |      |      |
| HETATM | 2775 | H1 | PRP | 130 | 29.754 | 14.652 | 33.208 | 1.00 | 0.00 |
| H      |      |    |     |     |        |        |        |      |      |
| HETATM | 2776 | C1 | PRP | 130 | 30.093 | 16.438 | 33.045 | 1.00 | 0.00 |
| C      |      |    |     |     |        |        |        |      |      |
| HETATM | 2777 | H2 | PRP | 130 | 31.060 | 16.560 | 33.534 | 1.00 | 0.00 |
| H      |      |    |     |     |        |        |        |      |      |
| HETATM | 2778 | H3 | PRP | 130 | 30.058 | 17.149 | 32.219 | 1.00 | 0.00 |
| H      |      |    |     |     |        |        |        |      |      |
| HETATM | 2779 | C2 | PRP | 130 | 28.835 | 16.506 | 33.940 | 1.00 | 0.00 |
| C      |      |    |     |     |        |        |        |      |      |
| HETATM | 2780 | H4 | PRP | 130 | 28.823 | 17.348 | 34.632 | 1.00 | 0.00 |
| H      |      |    |     |     |        |        |        |      |      |
| HETATM | 2781 | O2 | PRP | 130 | 28.784 | 15.263 | 34.644 | 1.00 | 0.00 |
| O      |      |    |     |     |        |        |        |      |      |
| HETATM | 2782 | H5 | PRP | 130 | 27.891 | 15.130 | 34.970 | 1.00 | 0.00 |
| H      |      |    |     |     |        |        |        |      |      |
| HETATM | 2783 | C3 | PRP | 130 | 27.455 | 16.464 | 33.130 | 1.00 | 0.00 |
| C      |      |    |     |     |        |        |        |      |      |
| HETATM | 2784 | H6 | PRP | 130 | 27.402 | 15.601 | 32.466 | 1.00 | 0.00 |
| H      |      |    |     |     |        |        |        |      |      |
| HETATM | 2785 | H7 | PRP | 130 | 26.650 | 16.635 | 33.844 | 1.00 | 0.00 |
| H      |      |    |     |     |        |        |        |      |      |
| HETATM | 2786 | H8 | PRP | 130 | 27.320 | 17.271 | 32.410 | 1.00 | 0.00 |
| H      |      |    |     |     |        |        |        |      |      |
| HETATM | 2787 | O1 | PRP | 131 | 26.295 | 24.511 | 27.902 | 1.00 | 0.00 |
| O      |      |    |     |     |        |        |        |      |      |
| HETATM | 2788 | H1 | PRP | 131 | 26.782 | 25.233 | 28.304 | 1.00 | 0.00 |
| H      |      |    |     |     |        |        |        |      |      |
| HETATM | 2789 | C1 | PRP | 131 | 24.966 | 24.492 | 28.371 | 1.00 | 0.00 |
| C      |      |    |     |     |        |        |        |      |      |
| HETATM | 2790 | H2 | PRP | 131 | 24.493 | 23.510 | 28.365 | 1.00 | 0.00 |
| H      |      |    |     |     |        |        |        |      |      |
| HETATM | 2791 | H3 | PRP | 131 | 25.075 | 24.935 | 29.361 | 1.00 | 0.00 |
| H      |      |    |     |     |        |        |        |      |      |
| HETATM | 2792 | C2 | PRP | 131 | 24.071 | 25.420 | 27.528 | 1.00 | 0.00 |
| C      |      |    |     |     |        |        |        |      |      |
| HETATM | 2793 | H4 | PRP | 131 | 23.876 | 24.965 | 26.557 | 1.00 | 0.00 |
| H      |      |    |     |     |        |        |        |      |      |
| HETATM | 2794 | O2 | PRP | 131 | 24.707 | 26.654 | 27.313 | 1.00 | 0.00 |
| O      |      |    |     |     |        |        |        |      |      |
| HETATM | 2795 | H5 | PRP | 131 | 25.664 | 26.647 | 27.240 | 1.00 | 0.00 |
| H      |      |    |     |     |        |        |        |      |      |
| HETATM | 2796 | C3 | PRP | 131 | 22.845 | 25.682 | 28.296 | 1.00 | 0.00 |
| C      |      |    |     |     |        |        |        |      |      |
| HETATM | 2797 | H6 | PRP | 131 | 22.191 | 26.148 | 27.558 | 1.00 | 0.00 |
| H      |      |    |     |     |        |        |        |      |      |
| HETATM | 2798 | H7 | PRP | 131 | 22.425 | 24.688 | 28.451 | 1.00 | 0.00 |
| H      |      |    |     |     |        |        |        |      |      |
| HETATM | 2799 | H8 | PRP | 131 | 23.188 | 26.185 | 29.199 | 1.00 | 0.00 |
| H      |      |    |     |     |        |        |        |      |      |

|        |      |    |     |     |        |        |        |      |      |
|--------|------|----|-----|-----|--------|--------|--------|------|------|
| HETATM | 2800 | O1 | PRP | 132 | 38.546 | 23.319 | 46.731 | 1.00 | 0.00 |
| O      |      |    |     |     |        |        |        |      |      |
| HETATM | 2801 | H1 | PRP | 132 | 38.028 | 23.391 | 45.927 | 1.00 | 0.00 |
| H      |      |    |     |     |        |        |        |      |      |
| HETATM | 2802 | C1 | PRP | 132 | 37.773 | 24.086 | 47.659 | 1.00 | 0.00 |
| C      |      |    |     |     |        |        |        |      |      |
| HETATM | 2803 | H2 | PRP | 132 | 37.413 | 24.949 | 47.097 | 1.00 | 0.00 |
| H      |      |    |     |     |        |        |        |      |      |
| HETATM | 2804 | H3 | PRP | 132 | 36.872 | 23.559 | 47.972 | 1.00 | 0.00 |
| H      |      |    |     |     |        |        |        |      |      |
| HETATM | 2805 | C2 | PRP | 132 | 38.687 | 24.583 | 48.839 | 1.00 | 0.00 |
| C      |      |    |     |     |        |        |        |      |      |
| HETATM | 2806 | H4 | PRP | 132 | 38.059 | 25.203 | 49.479 | 1.00 | 0.00 |
| H      |      |    |     |     |        |        |        |      |      |
| HETATM | 2807 | O2 | PRP | 132 | 39.754 | 25.292 | 48.302 | 1.00 | 0.00 |
| O      |      |    |     |     |        |        |        |      |      |
| HETATM | 2808 | H5 | PRP | 132 | 40.008 | 24.860 | 47.484 | 1.00 | 0.00 |
| H      |      |    |     |     |        |        |        |      |      |
| HETATM | 2809 | C3 | PRP | 132 | 39.125 | 23.488 | 49.787 | 1.00 | 0.00 |
| C      |      |    |     |     |        |        |        |      |      |
| HETATM | 2810 | H6 | PRP | 132 | 38.257 | 23.090 | 50.313 | 1.00 | 0.00 |
| H      |      |    |     |     |        |        |        |      |      |
| HETATM | 2811 | H7 | PRP | 132 | 39.682 | 22.663 | 49.343 | 1.00 | 0.00 |
| H      |      |    |     |     |        |        |        |      |      |
| HETATM | 2812 | H8 | PRP | 132 | 39.882 | 23.994 | 50.386 | 1.00 | 0.00 |
| H      |      |    |     |     |        |        |        |      |      |
| HETATM | 2813 | O1 | PRP | 133 | 47.602 | 26.658 | 35.192 | 1.00 | 0.00 |
| O      |      |    |     |     |        |        |        |      |      |
| HETATM | 2814 | H1 | PRP | 133 | 47.704 | 27.611 | 35.141 | 1.00 | 0.00 |
| H      |      |    |     |     |        |        |        |      |      |
| HETATM | 2815 | C1 | PRP | 133 | 48.889 | 26.114 | 35.623 | 1.00 | 0.00 |
| C      |      |    |     |     |        |        |        |      |      |
| HETATM | 2816 | H2 | PRP | 133 | 48.997 | 25.093 | 35.255 | 1.00 | 0.00 |
| H      |      |    |     |     |        |        |        |      |      |
| HETATM | 2817 | H3 | PRP | 133 | 49.696 | 26.728 | 35.224 | 1.00 | 0.00 |
| H      |      |    |     |     |        |        |        |      |      |
| HETATM | 2818 | C2 | PRP | 133 | 48.876 | 26.278 | 37.140 | 1.00 | 0.00 |
| C      |      |    |     |     |        |        |        |      |      |
| HETATM | 2819 | H4 | PRP | 133 | 48.038 | 25.787 | 37.633 | 1.00 | 0.00 |
| H      |      |    |     |     |        |        |        |      |      |
| HETATM | 2820 | O2 | PRP | 133 | 49.032 | 27.611 | 37.564 | 1.00 | 0.00 |
| O      |      |    |     |     |        |        |        |      |      |
| HETATM | 2821 | H5 | PRP | 133 | 48.264 | 27.888 | 38.069 | 1.00 | 0.00 |
| H      |      |    |     |     |        |        |        |      |      |
| HETATM | 2822 | C3 | PRP | 133 | 50.100 | 25.549 | 37.714 | 1.00 | 0.00 |
| C      |      |    |     |     |        |        |        |      |      |
| HETATM | 2823 | H6 | PRP | 133 | 50.060 | 25.303 | 38.775 | 1.00 | 0.00 |
| H      |      |    |     |     |        |        |        |      |      |
| HETATM | 2824 | H7 | PRP | 133 | 50.088 | 24.522 | 37.348 | 1.00 | 0.00 |
| H      |      |    |     |     |        |        |        |      |      |
| HETATM | 2825 | H8 | PRP | 133 | 50.993 | 26.049 | 37.337 | 1.00 | 0.00 |
| H      |      |    |     |     |        |        |        |      |      |
| HETATM | 2826 | O1 | PRP | 134 | 32.628 | 3.628  | 39.154 | 1.00 | 0.00 |
| O      |      |    |     |     |        |        |        |      |      |
| HETATM | 2827 | H1 | PRP | 134 | 33.019 | 2.887  | 38.685 | 1.00 | 0.00 |
| H      |      |    |     |     |        |        |        |      |      |



|        |      |    |     |     |        |        |        |      |      |
|--------|------|----|-----|-----|--------|--------|--------|------|------|
| HETATM | 2828 | C1 | PRP | 134 | 31.995 | 4.492  | 38.180 | 1.00 | 0.00 |
| C      |      |    |     |     |        |        |        |      |      |
| HETATM | 2829 | H2 | PRP | 134 | 31.213 | 4.017  | 37.588 | 1.00 | 0.00 |
| H      |      |    |     |     |        |        |        |      |      |
| HETATM | 2830 | H3 | PRP | 134 | 31.557 | 5.326  | 38.729 | 1.00 | 0.00 |
| H      |      |    |     |     |        |        |        |      |      |
| HETATM | 2831 | C2 | PRP | 134 | 33.147 | 5.133  | 37.355 | 1.00 | 0.00 |
| C      |      |    |     |     |        |        |        |      |      |
| HETATM | 2832 | H4 | PRP | 134 | 32.700 | 5.873  | 36.691 | 1.00 | 0.00 |
| H      |      |    |     |     |        |        |        |      |      |
| HETATM | 2833 | O2 | PRP | 134 | 33.740 | 4.128  | 36.476 | 1.00 | 0.00 |
| O      |      |    |     |     |        |        |        |      |      |
| HETATM | 2834 | H5 | PRP | 134 | 34.240 | 3.514  | 37.018 | 1.00 | 0.00 |
| H      |      |    |     |     |        |        |        |      |      |
| HETATM | 2835 | C3 | PRP | 134 | 34.115 | 5.795  | 38.339 | 1.00 | 0.00 |
| C      |      |    |     |     |        |        |        |      |      |
| HETATM | 2836 | H6 | PRP | 134 | 34.727 | 5.097  | 38.910 | 1.00 | 0.00 |
| H      |      |    |     |     |        |        |        |      |      |
| HETATM | 2837 | H7 | PRP | 134 | 34.811 | 6.403  | 37.761 | 1.00 | 0.00 |
| H      |      |    |     |     |        |        |        |      |      |
| HETATM | 2838 | H8 | PRP | 134 | 33.541 | 6.425  | 39.019 | 1.00 | 0.00 |
| H      |      |    |     |     |        |        |        |      |      |
| HETATM | 2839 | O1 | PRP | 135 | 33.757 | -2.534 | 37.935 | 1.00 | 0.00 |
| O      |      |    |     |     |        |        |        |      |      |
| HETATM | 2840 | H1 | PRP | 135 | 33.393 | -1.919 | 37.293 | 1.00 | 0.00 |
| H      |      |    |     |     |        |        |        |      |      |
| HETATM | 2841 | C1 | PRP | 135 | 33.276 | -3.865 | 37.798 | 1.00 | 0.00 |
| C      |      |    |     |     |        |        |        |      |      |
| HETATM | 2842 | H2 | PRP | 135 | 33.880 | -4.468 | 38.477 | 1.00 | 0.00 |
| H      |      |    |     |     |        |        |        |      |      |
| HETATM | 2843 | H3 | PRP | 135 | 32.250 | -3.957 | 38.154 | 1.00 | 0.00 |
| H      |      |    |     |     |        |        |        |      |      |
| HETATM | 2844 | C2 | PRP | 135 | 33.431 | -4.304 | 36.301 | 1.00 | 0.00 |
| C      |      |    |     |     |        |        |        |      |      |
| HETATM | 2845 | H4 | PRP | 135 | 34.463 | -4.103 | 36.016 | 1.00 | 0.00 |
| H      |      |    |     |     |        |        |        |      |      |
| HETATM | 2846 | O2 | PRP | 135 | 32.595 | -3.606 | 35.399 | 1.00 | 0.00 |
| O      |      |    |     |     |        |        |        |      |      |
| HETATM | 2847 | H5 | PRP | 135 | 33.005 | -3.722 | 34.539 | 1.00 | 0.00 |
| H      |      |    |     |     |        |        |        |      |      |
| HETATM | 2848 | C3 | PRP | 135 | 33.102 | -5.773 | 36.321 | 1.00 | 0.00 |
| C      |      |    |     |     |        |        |        |      |      |
| HETATM | 2849 | H6 | PRP | 135 | 33.786 | -6.377 | 36.916 | 1.00 | 0.00 |
| H      |      |    |     |     |        |        |        |      |      |
| HETATM | 2850 | H7 | PRP | 135 | 32.085 | -5.904 | 36.692 | 1.00 | 0.00 |
| H      |      |    |     |     |        |        |        |      |      |
| HETATM | 2851 | H8 | PRP | 135 | 33.261 | -6.138 | 35.307 | 1.00 | 0.00 |
| H      |      |    |     |     |        |        |        |      |      |
| HETATM | 2852 | O1 | PRP | 136 | 22.179 | 19.268 | 27.428 | 1.00 | 0.00 |
| O      |      |    |     |     |        |        |        |      |      |
| HETATM | 2853 | H1 | PRP | 136 | 22.360 | 19.399 | 26.494 | 1.00 | 0.00 |
| H      |      |    |     |     |        |        |        |      |      |
| HETATM | 2854 | C1 | PRP | 136 | 21.907 | 17.892 | 27.571 | 1.00 | 0.00 |
| C      |      |    |     |     |        |        |        |      |      |
| HETATM | 2855 | H2 | PRP | 136 | 21.760 | 17.766 | 28.644 | 1.00 | 0.00 |
| H      |      |    |     |     |        |        |        |      |      |

|        |      |    |     |     |        |        |        |      |      |
|--------|------|----|-----|-----|--------|--------|--------|------|------|
| HETATM | 2856 | H3 | PRP | 136 | 21.057 | 17.581 | 26.965 | 1.00 | 0.00 |
| H      |      |    |     |     |        |        |        |      |      |
| HETATM | 2857 | C2 | PRP | 136 | 23.170 | 17.091 | 27.175 | 1.00 | 0.00 |
| C      |      |    |     |     |        |        |        |      |      |
| HETATM | 2858 | H4 | PRP | 136 | 24.066 | 17.630 | 27.481 | 1.00 | 0.00 |
| H      |      |    |     |     |        |        |        |      |      |
| HETATM | 2859 | O2 | PRP | 136 | 23.124 | 16.898 | 25.750 | 1.00 | 0.00 |
| O      |      |    |     |     |        |        |        |      |      |
| HETATM | 2860 | H5 | PRP | 136 | 23.145 | 17.783 | 25.378 | 1.00 | 0.00 |
| H      |      |    |     |     |        |        |        |      |      |
| HETATM | 2861 | C3 | PRP | 136 | 23.223 | 15.649 | 27.634 | 1.00 | 0.00 |
| C      |      |    |     |     |        |        |        |      |      |
| HETATM | 2862 | H6 | PRP | 136 | 22.213 | 15.252 | 27.531 | 1.00 | 0.00 |
| H      |      |    |     |     |        |        |        |      |      |
| HETATM | 2863 | H7 | PRP | 136 | 23.868 | 15.011 | 27.031 | 1.00 | 0.00 |
| H      |      |    |     |     |        |        |        |      |      |
| HETATM | 2864 | H8 | PRP | 136 | 23.538 | 15.663 | 28.677 | 1.00 | 0.00 |
| H      |      |    |     |     |        |        |        |      |      |
| HETATM | 2865 | O1 | PRP | 137 | 50.330 | 10.291 | 31.867 | 1.00 | 0.00 |
| O      |      |    |     |     |        |        |        |      |      |
| HETATM | 2866 | H1 | PRP | 137 | 49.723 | 10.460 | 32.592 | 1.00 | 0.00 |
| H      |      |    |     |     |        |        |        |      |      |
| HETATM | 2867 | C1 | PRP | 137 | 49.983 | 9.028  | 31.465 | 1.00 | 0.00 |
| C      |      |    |     |     |        |        |        |      |      |
| HETATM | 2868 | H2 | PRP | 137 | 50.504 | 8.932  | 30.512 | 1.00 | 0.00 |
| H      |      |    |     |     |        |        |        |      |      |
| HETATM | 2869 | H3 | PRP | 137 | 50.417 | 8.201  | 32.027 | 1.00 | 0.00 |
| H      |      |    |     |     |        |        |        |      |      |
| HETATM | 2870 | C2 | PRP | 137 | 48.440 | 8.956  | 31.341 | 1.00 | 0.00 |
| C      |      |    |     |     |        |        |        |      |      |
| HETATM | 2871 | H4 | PRP | 137 | 48.156 | 9.885  | 30.846 | 1.00 | 0.00 |
| H      |      |    |     |     |        |        |        |      |      |
| HETATM | 2872 | O2 | PRP | 137 | 47.940 | 9.016  | 32.631 | 1.00 | 0.00 |
| O      |      |    |     |     |        |        |        |      |      |
| HETATM | 2873 | H5 | PRP | 137 | 48.410 | 8.360  | 33.151 | 1.00 | 0.00 |
| H      |      |    |     |     |        |        |        |      |      |
| HETATM | 2874 | C3 | PRP | 137 | 48.010 | 7.669  | 30.623 | 1.00 | 0.00 |
| C      |      |    |     |     |        |        |        |      |      |
| HETATM | 2875 | H6 | PRP | 137 | 46.950 | 7.526  | 30.834 | 1.00 | 0.00 |
| H      |      |    |     |     |        |        |        |      |      |
| HETATM | 2876 | H7 | PRP | 137 | 48.289 | 7.764  | 29.574 | 1.00 | 0.00 |
| H      |      |    |     |     |        |        |        |      |      |
| HETATM | 2877 | H8 | PRP | 137 | 48.526 | 6.794  | 31.020 | 1.00 | 0.00 |
| H      |      |    |     |     |        |        |        |      |      |
| HETATM | 2878 | O1 | PRP | 138 | 48.254 | 13.867 | 51.457 | 1.00 | 0.00 |
| O      |      |    |     |     |        |        |        |      |      |
| HETATM | 2879 | H1 | PRP | 138 | 48.154 | 14.665 | 50.933 | 1.00 | 0.00 |
| H      |      |    |     |     |        |        |        |      |      |
| HETATM | 2880 | C1 | PRP | 138 | 47.299 | 13.925 | 52.471 | 1.00 | 0.00 |
| C      |      |    |     |     |        |        |        |      |      |
| HETATM | 2881 | H2 | PRP | 138 | 46.382 | 13.508 | 52.054 | 1.00 | 0.00 |
| H      |      |    |     |     |        |        |        |      |      |
| HETATM | 2882 | H3 | PRP | 138 | 47.506 | 13.278 | 53.323 | 1.00 | 0.00 |
| H      |      |    |     |     |        |        |        |      |      |
| HETATM | 2883 | C2 | PRP | 138 | 47.029 | 15.376 | 52.879 | 1.00 | 0.00 |
| C      |      |    |     |     |        |        |        |      |      |

|        |      |    |     |     |        |        |        |      |      |
|--------|------|----|-----|-----|--------|--------|--------|------|------|
| HETATM | 2884 | H4 | PRP | 138 | 46.201 | 15.429 | 53.586 | 1.00 | 0.00 |
| H      |      |    |     |     |        |        |        |      |      |
| HETATM | 2885 | O2 | PRP | 138 | 46.706 | 16.139 | 51.677 | 1.00 | 0.00 |
| O      |      |    |     |     |        |        |        |      |      |
| HETATM | 2886 | H5 | PRP | 138 | 47.035 | 17.034 | 51.793 | 1.00 | 0.00 |
| H      |      |    |     |     |        |        |        |      |      |
| HETATM | 2887 | C3 | PRP | 138 | 48.241 | 16.025 | 53.558 | 1.00 | 0.00 |
| C      |      |    |     |     |        |        |        |      |      |
| HETATM | 2888 | H6 | PRP | 138 | 49.165 | 15.858 | 53.004 | 1.00 | 0.00 |
| H      |      |    |     |     |        |        |        |      |      |
| HETATM | 2889 | H7 | PRP | 138 | 48.221 | 17.114 | 53.508 | 1.00 | 0.00 |
| H      |      |    |     |     |        |        |        |      |      |
| HETATM | 2890 | H8 | PRP | 138 | 48.391 | 15.783 | 54.610 | 1.00 | 0.00 |
| H      |      |    |     |     |        |        |        |      |      |
| HETATM | 2891 | O1 | PRP | 139 | 46.602 | 26.677 | 41.977 | 1.00 | 0.00 |
| O      |      |    |     |     |        |        |        |      |      |
| HETATM | 2892 | H1 | PRP | 139 | 46.833 | 26.230 | 42.794 | 1.00 | 0.00 |
| H      |      |    |     |     |        |        |        |      |      |
| HETATM | 2893 | C1 | PRP | 139 | 47.800 | 27.292 | 41.640 | 1.00 | 0.00 |
| C      |      |    |     |     |        |        |        |      |      |
| HETATM | 2894 | H2 | PRP | 139 | 47.776 | 27.831 | 40.692 | 1.00 | 0.00 |
| H      |      |    |     |     |        |        |        |      |      |
| HETATM | 2895 | H3 | PRP | 139 | 47.905 | 27.989 | 42.471 | 1.00 | 0.00 |
| H      |      |    |     |     |        |        |        |      |      |
| HETATM | 2896 | C2 | PRP | 139 | 48.956 | 26.294 | 41.754 | 1.00 | 0.00 |
| C      |      |    |     |     |        |        |        |      |      |
| HETATM | 2897 | H4 | PRP | 139 | 48.720 | 25.435 | 41.125 | 1.00 | 0.00 |
| H      |      |    |     |     |        |        |        |      |      |
| HETATM | 2898 | O2 | PRP | 139 | 49.168 | 26.017 | 43.137 | 1.00 | 0.00 |
| O      |      |    |     |     |        |        |        |      |      |
| HETATM | 2899 | H5 | PRP | 139 | 49.731 | 25.250 | 43.262 | 1.00 | 0.00 |
| H      |      |    |     |     |        |        |        |      |      |
| HETATM | 2900 | C3 | PRP | 139 | 50.255 | 27.034 | 41.274 | 1.00 | 0.00 |
| C      |      |    |     |     |        |        |        |      |      |
| HETATM | 2901 | H6 | PRP | 139 | 51.066 | 26.311 | 41.189 | 1.00 | 0.00 |
| H      |      |    |     |     |        |        |        |      |      |
| HETATM | 2902 | H7 | PRP | 139 | 50.132 | 27.326 | 40.231 | 1.00 | 0.00 |
| H      |      |    |     |     |        |        |        |      |      |
| HETATM | 2903 | H8 | PRP | 139 | 50.415 | 27.957 | 41.830 | 1.00 | 0.00 |
| H      |      |    |     |     |        |        |        |      |      |
| HETATM | 2904 | O1 | PRP | 140 | 21.384 | -5.425 | 29.567 | 1.00 | 0.00 |
| O      |      |    |     |     |        |        |        |      |      |
| HETATM | 2905 | H1 | PRP | 140 | 21.402 | -5.701 | 28.647 | 1.00 | 0.00 |
| H      |      |    |     |     |        |        |        |      |      |
| HETATM | 2906 | C1 | PRP | 140 | 21.894 | -4.078 | 29.497 | 1.00 | 0.00 |
| C      |      |    |     |     |        |        |        |      |      |
| HETATM | 2907 | H2 | PRP | 140 | 22.982 | -4.119 | 29.437 | 1.00 | 0.00 |
| H      |      |    |     |     |        |        |        |      |      |
| HETATM | 2908 | H3 | PRP | 140 | 21.513 | -3.539 | 28.629 | 1.00 | 0.00 |
| H      |      |    |     |     |        |        |        |      |      |
| HETATM | 2909 | C2 | PRP | 140 | 21.606 | -3.274 | 30.776 | 1.00 | 0.00 |
| C      |      |    |     |     |        |        |        |      |      |
| HETATM | 2910 | H4 | PRP | 140 | 22.176 | -2.356 | 30.630 | 1.00 | 0.00 |
| H      |      |    |     |     |        |        |        |      |      |
| HETATM | 2911 | O2 | PRP | 140 | 22.013 | -4.052 | 31.981 | 1.00 | 0.00 |
| O      |      |    |     |     |        |        |        |      |      |

|        |      |    |     |     |        |        |        |      |      |
|--------|------|----|-----|-----|--------|--------|--------|------|------|
| HETATM | 2912 | H5 | PRP | 140 | 21.652 | -4.940 | 31.920 | 1.00 | 0.00 |
| H      |      |    |     |     |        |        |        |      |      |
| HETATM | 2913 | C3 | PRP | 140 | 20.148 | -2.889 | 31.111 | 1.00 | 0.00 |
| C      |      |    |     |     |        |        |        |      |      |
| HETATM | 2914 | H6 | PRP | 140 | 19.371 | -3.623 | 30.902 | 1.00 | 0.00 |
| H      |      |    |     |     |        |        |        |      |      |
| HETATM | 2915 | H7 | PRP | 140 | 20.016 | -2.652 | 32.167 | 1.00 | 0.00 |
| H      |      |    |     |     |        |        |        |      |      |
| HETATM | 2916 | H8 | PRP | 140 | 19.884 | -2.000 | 30.538 | 1.00 | 0.00 |
| H      |      |    |     |     |        |        |        |      |      |
| HETATM | 2917 | O1 | PRP | 141 | 32.852 | -3.759 | 24.137 | 1.00 | 0.00 |
| O      |      |    |     |     |        |        |        |      |      |
| HETATM | 2918 | H1 | PRP | 141 | 32.085 | -3.627 | 24.699 | 1.00 | 0.00 |
| H      |      |    |     |     |        |        |        |      |      |
| HETATM | 2919 | C1 | PRP | 141 | 34.060 | -4.059 | 24.796 | 1.00 | 0.00 |
| C      |      |    |     |     |        |        |        |      |      |
| HETATM | 2920 | H2 | PRP | 141 | 34.832 | -4.230 | 24.046 | 1.00 | 0.00 |
| H      |      |    |     |     |        |        |        |      |      |
| HETATM | 2921 | H3 | PRP | 141 | 34.382 | -3.200 | 25.385 | 1.00 | 0.00 |
| H      |      |    |     |     |        |        |        |      |      |
| HETATM | 2922 | C2 | PRP | 141 | 33.838 | -5.281 | 25.622 | 1.00 | 0.00 |
| C      |      |    |     |     |        |        |        |      |      |
| HETATM | 2923 | H4 | PRP | 141 | 33.378 | -6.119 | 25.098 | 1.00 | 0.00 |
| H      |      |    |     |     |        |        |        |      |      |
| HETATM | 2924 | O2 | PRP | 141 | 32.967 | -4.873 | 26.698 | 1.00 | 0.00 |
| O      |      |    |     |     |        |        |        |      |      |
| HETATM | 2925 | H5 | PRP | 141 | 32.221 | -4.375 | 26.356 | 1.00 | 0.00 |
| H      |      |    |     |     |        |        |        |      |      |
| HETATM | 2926 | C3 | PRP | 141 | 35.074 | -5.863 | 26.420 | 1.00 | 0.00 |
| C      |      |    |     |     |        |        |        |      |      |
| HETATM | 2927 | H6 | PRP | 141 | 34.658 | -6.521 | 27.183 | 1.00 | 0.00 |
| H      |      |    |     |     |        |        |        |      |      |
| HETATM | 2928 | H7 | PRP | 141 | 35.648 | -6.424 | 25.682 | 1.00 | 0.00 |
| H      |      |    |     |     |        |        |        |      |      |
| HETATM | 2929 | H8 | PRP | 141 | 35.527 | -4.925 | 26.740 | 1.00 | 0.00 |
| H      |      |    |     |     |        |        |        |      |      |
| HETATM | 2930 | O1 | PRP | 142 | 31.135 | 9.448  | 32.933 | 1.00 | 0.00 |
| O      |      |    |     |     |        |        |        |      |      |
| HETATM | 2931 | H1 | PRP | 142 | 30.197 | 9.482  | 32.728 | 1.00 | 0.00 |
| H      |      |    |     |     |        |        |        |      |      |
| HETATM | 2932 | C1 | PRP | 142 | 31.318 | 8.179  | 33.439 | 1.00 | 0.00 |
| C      |      |    |     |     |        |        |        |      |      |
| HETATM | 2933 | H2 | PRP | 142 | 30.435 | 7.908  | 34.019 | 1.00 | 0.00 |
| H      |      |    |     |     |        |        |        |      |      |
| HETATM | 2934 | H3 | PRP | 142 | 31.584 | 7.422  | 32.702 | 1.00 | 0.00 |
| H      |      |    |     |     |        |        |        |      |      |
| HETATM | 2935 | C2 | PRP | 142 | 32.446 | 8.233  | 34.561 | 1.00 | 0.00 |
| C      |      |    |     |     |        |        |        |      |      |
| HETATM | 2936 | H4 | PRP | 142 | 32.380 | 7.405  | 35.266 | 1.00 | 0.00 |
| H      |      |    |     |     |        |        |        |      |      |
| HETATM | 2937 | O2 | PRP | 142 | 32.085 | 9.317  | 35.405 | 1.00 | 0.00 |
| O      |      |    |     |     |        |        |        |      |      |
| HETATM | 2938 | H5 | PRP | 142 | 31.816 | 9.947  | 34.733 | 1.00 | 0.00 |
| H      |      |    |     |     |        |        |        |      |      |
| HETATM | 2939 | C3 | PRP | 142 | 33.877 | 8.339  | 34.116 | 1.00 | 0.00 |
| C      |      |    |     |     |        |        |        |      |      |

|        |      |    |     |     |        |        |        |      |      |
|--------|------|----|-----|-----|--------|--------|--------|------|------|
| HETATM | 2940 | H6 | PRP | 142 | 34.132 | 9.309  | 33.691 | 1.00 | 0.00 |
| H      |      |    |     |     |        |        |        |      |      |
| HETATM | 2941 | H7 | PRP | 142 | 34.447 | 8.318  | 35.045 | 1.00 | 0.00 |
| H      |      |    |     |     |        |        |        |      |      |
| HETATM | 2942 | H8 | PRP | 142 | 34.136 | 7.473  | 33.505 | 1.00 | 0.00 |
| H      |      |    |     |     |        |        |        |      |      |
| HETATM | 2943 | O1 | PRP | 143 | 33.204 | 8.817  | 37.662 | 1.00 | 0.00 |
| O      |      |    |     |     |        |        |        |      |      |
| HETATM | 2944 | H1 | PRP | 143 | 32.945 | 8.920  | 36.744 | 1.00 | 0.00 |
| H      |      |    |     |     |        |        |        |      |      |
| HETATM | 2945 | C1 | PRP | 143 | 34.546 | 9.210  | 37.840 | 1.00 | 0.00 |
| C      |      |    |     |     |        |        |        |      |      |
| HETATM | 2946 | H2 | PRP | 143 | 34.881 | 8.910  | 38.833 | 1.00 | 0.00 |
| H      |      |    |     |     |        |        |        |      |      |
| HETATM | 2947 | H3 | PRP | 143 | 35.145 | 8.680  | 37.100 | 1.00 | 0.00 |
| H      |      |    |     |     |        |        |        |      |      |
| HETATM | 2948 | C2 | PRP | 143 | 34.840 | 10.728 | 37.643 | 1.00 | 0.00 |
| C      |      |    |     |     |        |        |        |      |      |
| HETATM | 2949 | H4 | PRP | 143 | 34.091 | 11.245 | 38.244 | 1.00 | 0.00 |
| H      |      |    |     |     |        |        |        |      |      |
| HETATM | 2950 | O2 | PRP | 143 | 34.618 | 11.139 | 36.335 | 1.00 | 0.00 |
| O      |      |    |     |     |        |        |        |      |      |
| HETATM | 2951 | H5 | PRP | 143 | 33.663 | 11.187 | 36.250 | 1.00 | 0.00 |
| H      |      |    |     |     |        |        |        |      |      |
| HETATM | 2952 | C3 | PRP | 143 | 36.306 | 11.169 | 37.888 | 1.00 | 0.00 |
| C      |      |    |     |     |        |        |        |      |      |
| HETATM | 2953 | H6 | PRP | 143 | 36.548 | 12.174 | 37.544 | 1.00 | 0.00 |
| H      |      |    |     |     |        |        |        |      |      |
| HETATM | 2954 | H7 | PRP | 143 | 36.448 | 11.157 | 38.969 | 1.00 | 0.00 |
| H      |      |    |     |     |        |        |        |      |      |
| HETATM | 2955 | H8 | PRP | 143 | 37.051 | 10.562 | 37.374 | 1.00 | 0.00 |
| H      |      |    |     |     |        |        |        |      |      |
| HETATM | 2956 | O1 | PRP | 144 | 37.915 | 17.951 | 35.603 | 1.00 | 0.00 |
| O      |      |    |     |     |        |        |        |      |      |
| HETATM | 2957 | H1 | PRP | 144 | 37.232 | 17.455 | 36.061 | 1.00 | 0.00 |
| H      |      |    |     |     |        |        |        |      |      |
| HETATM | 2958 | C1 | PRP | 144 | 39.019 | 17.996 | 36.517 | 1.00 | 0.00 |
| C      |      |    |     |     |        |        |        |      |      |
| HETATM | 2959 | H2 | PRP | 144 | 38.667 | 18.706 | 37.266 | 1.00 | 0.00 |
| H      |      |    |     |     |        |        |        |      |      |
| HETATM | 2960 | H3 | PRP | 144 | 39.285 | 17.032 | 36.950 | 1.00 | 0.00 |
| H      |      |    |     |     |        |        |        |      |      |
| HETATM | 2961 | C2 | PRP | 144 | 40.275 | 18.451 | 35.733 | 1.00 | 0.00 |
| C      |      |    |     |     |        |        |        |      |      |
| HETATM | 2962 | H4 | PRP | 144 | 40.291 | 19.528 | 35.901 | 1.00 | 0.00 |
| H      |      |    |     |     |        |        |        |      |      |
| HETATM | 2963 | O2 | PRP | 144 | 40.240 | 18.054 | 34.389 | 1.00 | 0.00 |
| O      |      |    |     |     |        |        |        |      |      |
| HETATM | 2964 | H5 | PRP | 144 | 39.309 | 18.105 | 34.158 | 1.00 | 0.00 |
| H      |      |    |     |     |        |        |        |      |      |
| HETATM | 2965 | C3 | PRP | 144 | 41.544 | 17.895 | 36.321 | 1.00 | 0.00 |
| C      |      |    |     |     |        |        |        |      |      |
| HETATM | 2966 | H6 | PRP | 144 | 41.760 | 18.329 | 37.298 | 1.00 | 0.00 |
| H      |      |    |     |     |        |        |        |      |      |
| HETATM | 2967 | H7 | PRP | 144 | 41.418 | 16.820 | 36.449 | 1.00 | 0.00 |
| H      |      |    |     |     |        |        |        |      |      |

|        |      |    |     |     |        |        |        |      |      |
|--------|------|----|-----|-----|--------|--------|--------|------|------|
| HETATM | 2968 | H8 | PRP | 144 | 42.366 | 18.153 | 35.654 | 1.00 | 0.00 |
| H      |      |    |     |     |        |        |        |      |      |
| HETATM | 2969 | O1 | PRP | 145 | 44.031 | 8.841  | 45.699 | 1.00 | 0.00 |
| O      |      |    |     |     |        |        |        |      |      |
| HETATM | 2970 | H1 | PRP | 145 | 43.794 | 7.912  | 45.742 | 1.00 | 0.00 |
| H      |      |    |     |     |        |        |        |      |      |
| HETATM | 2971 | C1 | PRP | 145 | 44.007 | 9.094  | 44.309 | 1.00 | 0.00 |
| C      |      |    |     |     |        |        |        |      |      |
| HETATM | 2972 | H2 | PRP | 145 | 43.851 | 10.169 | 44.229 | 1.00 | 0.00 |
| H      |      |    |     |     |        |        |        |      |      |
| HETATM | 2973 | H3 | PRP | 145 | 44.945 | 8.812  | 43.831 | 1.00 | 0.00 |
| H      |      |    |     |     |        |        |        |      |      |
| HETATM | 2974 | C2 | PRP | 145 | 42.870 | 8.385  | 43.589 | 1.00 | 0.00 |
| C      |      |    |     |     |        |        |        |      |      |
| HETATM | 2975 | H4 | PRP | 145 | 41.911 | 8.735  | 43.971 | 1.00 | 0.00 |
| H      |      |    |     |     |        |        |        |      |      |
| HETATM | 2976 | O2 | PRP | 145 | 42.940 | 7.003  | 43.963 | 1.00 | 0.00 |
| O      |      |    |     |     |        |        |        |      |      |
| HETATM | 2977 | H5 | PRP | 145 | 42.370 | 6.434  | 43.441 | 1.00 | 0.00 |
| H      |      |    |     |     |        |        |        |      |      |
| HETATM | 2978 | C3 | PRP | 145 | 42.824 | 8.543  | 42.056 | 1.00 | 0.00 |
| C      |      |    |     |     |        |        |        |      |      |
| HETATM | 2979 | H6 | PRP | 145 | 43.793 | 8.244  | 41.656 | 1.00 | 0.00 |
| H      |      |    |     |     |        |        |        |      |      |
| HETATM | 2980 | H7 | PRP | 145 | 42.128 | 7.814  | 41.643 | 1.00 | 0.00 |
| H      |      |    |     |     |        |        |        |      |      |
| HETATM | 2981 | H8 | PRP | 145 | 42.442 | 9.541  | 41.840 | 1.00 | 0.00 |
| H      |      |    |     |     |        |        |        |      |      |
| HETATM | 2982 | O1 | PRP | 146 | 49.092 | 6.485  | 34.398 | 1.00 | 0.00 |
| O      |      |    |     |     |        |        |        |      |      |
| HETATM | 2983 | H1 | PRP | 146 | 49.064 | 5.526  | 34.370 | 1.00 | 0.00 |
| H      |      |    |     |     |        |        |        |      |      |
| HETATM | 2984 | C1 | PRP | 146 | 48.594 | 6.825  | 35.709 | 1.00 | 0.00 |
| C      |      |    |     |     |        |        |        |      |      |
| HETATM | 2985 | H2 | PRP | 146 | 49.365 | 6.464  | 36.390 | 1.00 | 0.00 |
| H      |      |    |     |     |        |        |        |      |      |
| HETATM | 2986 | H3 | PRP | 146 | 48.520 | 7.910  | 35.772 | 1.00 | 0.00 |
| H      |      |    |     |     |        |        |        |      |      |
| HETATM | 2987 | C2 | PRP | 146 | 47.176 | 6.219  | 35.838 | 1.00 | 0.00 |
| C      |      |    |     |     |        |        |        |      |      |
| HETATM | 2988 | H4 | PRP | 146 | 46.907 | 6.308  | 36.891 | 1.00 | 0.00 |
| H      |      |    |     |     |        |        |        |      |      |
| HETATM | 2989 | O2 | PRP | 146 | 47.277 | 4.828  | 35.556 | 1.00 | 0.00 |
| O      |      |    |     |     |        |        |        |      |      |
| HETATM | 2990 | H5 | PRP | 146 | 47.736 | 4.490  | 36.328 | 1.00 | 0.00 |
| H      |      |    |     |     |        |        |        |      |      |
| HETATM | 2991 | C3 | PRP | 146 | 46.130 | 6.836  | 34.966 | 1.00 | 0.00 |
| C      |      |    |     |     |        |        |        |      |      |
| HETATM | 2992 | H6 | PRP | 146 | 46.052 | 7.897  | 35.200 | 1.00 | 0.00 |
| H      |      |    |     |     |        |        |        |      |      |
| HETATM | 2993 | H7 | PRP | 146 | 46.273 | 6.588  | 33.914 | 1.00 | 0.00 |
| H      |      |    |     |     |        |        |        |      |      |
| HETATM | 2994 | H8 | PRP | 146 | 45.189 | 6.435  | 35.343 | 1.00 | 0.00 |
| H      |      |    |     |     |        |        |        |      |      |
| HETATM | 2995 | O1 | PRP | 147 | 39.649 | 28.311 | 43.716 | 1.00 | 0.00 |
| O      |      |    |     |     |        |        |        |      |      |

|        |      |    |     |     |        |        |        |      |      |
|--------|------|----|-----|-----|--------|--------|--------|------|------|
| HETATM | 2996 | H1 | PRP | 147 | 38.699 | 28.183 | 43.765 | 1.00 | 0.00 |
| H      |      |    |     |     |        |        |        |      |      |
| HETATM | 2997 | C1 | PRP | 147 | 40.043 | 28.934 | 42.480 | 1.00 | 0.00 |
| C      |      |    |     |     |        |        |        |      |      |
| HETATM | 2998 | H2 | PRP | 147 | 39.297 | 29.676 | 42.198 | 1.00 | 0.00 |
| H      |      |    |     |     |        |        |        |      |      |
| HETATM | 2999 | H3 | PRP | 147 | 41.030 | 29.396 | 42.506 | 1.00 | 0.00 |
| H      |      |    |     |     |        |        |        |      |      |
| HETATM | 3000 | C2 | PRP | 147 | 40.112 | 27.803 | 41.359 | 1.00 | 0.00 |
| C      |      |    |     |     |        |        |        |      |      |
| HETATM | 3001 | H4 | PRP | 147 | 39.283 | 27.100 | 41.437 | 1.00 | 0.00 |
| H      |      |    |     |     |        |        |        |      |      |
| HETATM | 3002 | O2 | PRP | 147 | 41.243 | 27.015 | 41.532 | 1.00 | 0.00 |
| O      |      |    |     |     |        |        |        |      |      |
| HETATM | 3003 | H5 | PRP | 147 | 41.315 | 26.296 | 40.901 | 1.00 | 0.00 |
| H      |      |    |     |     |        |        |        |      |      |
| HETATM | 3004 | C3 | PRP | 147 | 40.153 | 28.449 | 39.963 | 1.00 | 0.00 |
| C      |      |    |     |     |        |        |        |      |      |
| HETATM | 3005 | H6 | PRP | 147 | 40.828 | 29.303 | 39.915 | 1.00 | 0.00 |
| H      |      |    |     |     |        |        |        |      |      |
| HETATM | 3006 | H7 | PRP | 147 | 40.271 | 27.737 | 39.146 | 1.00 | 0.00 |
| H      |      |    |     |     |        |        |        |      |      |
| HETATM | 3007 | H8 | PRP | 147 | 39.181 | 28.875 | 39.713 | 1.00 | 0.00 |
| H      |      |    |     |     |        |        |        |      |      |
| HETATM | 3008 | O1 | PRP | 148 | 37.216 | 25.455 | 31.037 | 1.00 | 0.00 |
| O      |      |    |     |     |        |        |        |      |      |
| HETATM | 3009 | H1 | PRP | 148 | 36.643 | 24.816 | 31.466 | 1.00 | 0.00 |
| H      |      |    |     |     |        |        |        |      |      |
| HETATM | 3010 | C1 | PRP | 148 | 38.212 | 24.735 | 30.376 | 1.00 | 0.00 |
| C      |      |    |     |     |        |        |        |      |      |
| HETATM | 3011 | H2 | PRP | 148 | 38.376 | 23.737 | 30.783 | 1.00 | 0.00 |
| H      |      |    |     |     |        |        |        |      |      |
| HETATM | 3012 | H3 | PRP | 148 | 37.827 | 24.675 | 29.358 | 1.00 | 0.00 |
| H      |      |    |     |     |        |        |        |      |      |
| HETATM | 3013 | C2 | PRP | 148 | 39.533 | 25.619 | 30.345 | 1.00 | 0.00 |
| C      |      |    |     |     |        |        |        |      |      |
| HETATM | 3014 | H4 | PRP | 148 | 40.126 | 25.202 | 31.159 | 1.00 | 0.00 |
| H      |      |    |     |     |        |        |        |      |      |
| HETATM | 3015 | O2 | PRP | 148 | 39.146 | 26.997 | 30.324 | 1.00 | 0.00 |
| O      |      |    |     |     |        |        |        |      |      |
| HETATM | 3016 | H5 | PRP | 148 | 38.189 | 26.953 | 30.263 | 1.00 | 0.00 |
| H      |      |    |     |     |        |        |        |      |      |
| HETATM | 3017 | C3 | PRP | 148 | 40.399 | 25.401 | 29.053 | 1.00 | 0.00 |
| C      |      |    |     |     |        |        |        |      |      |
| HETATM | 3018 | H6 | PRP | 148 | 41.205 | 26.114 | 28.885 | 1.00 | 0.00 |
| H      |      |    |     |     |        |        |        |      |      |
| HETATM | 3019 | H7 | PRP | 148 | 40.736 | 24.366 | 29.103 | 1.00 | 0.00 |
| H      |      |    |     |     |        |        |        |      |      |
| HETATM | 3020 | H8 | PRP | 148 | 39.815 | 25.542 | 28.144 | 1.00 | 0.00 |
| H      |      |    |     |     |        |        |        |      |      |
| HETATM | 3021 | O1 | PRP | 149 | 42.783 | 37.522 | 32.912 | 1.00 | 0.00 |
| O      |      |    |     |     |        |        |        |      |      |
| HETATM | 3022 | H1 | PRP | 149 | 43.374 | 36.889 | 33.326 | 1.00 | 0.00 |
| H      |      |    |     |     |        |        |        |      |      |
| HETATM | 3023 | C1 | PRP | 149 | 43.485 | 38.055 | 31.783 | 1.00 | 0.00 |
| C      |      |    |     |     |        |        |        |      |      |

|        |      |    |     |     |        |        |        |      |      |
|--------|------|----|-----|-----|--------|--------|--------|------|------|
| HETATM | 3024 | H2 | PRP | 149 | 43.299 | 37.435 | 30.907 | 1.00 | 0.00 |
| H      |      |    |     |     |        |        |        |      |      |
| HETATM | 3025 | H3 | PRP | 149 | 43.047 | 39.015 | 31.508 | 1.00 | 0.00 |
| H      |      |    |     |     |        |        |        |      |      |
| HETATM | 3026 | C2 | PRP | 149 | 45.023 | 38.072 | 32.088 | 1.00 | 0.00 |
| C      |      |    |     |     |        |        |        |      |      |
| HETATM | 3027 | H4 | PRP | 149 | 45.627 | 38.551 | 31.317 | 1.00 | 0.00 |
| H      |      |    |     |     |        |        |        |      |      |
| HETATM | 3028 | O2 | PRP | 149 | 45.405 | 36.731 | 32.223 | 1.00 | 0.00 |
| O      |      |    |     |     |        |        |        |      |      |
| HETATM | 3029 | H5 | PRP | 149 | 46.338 | 36.632 | 32.425 | 1.00 | 0.00 |
| H      |      |    |     |     |        |        |        |      |      |
| HETATM | 3030 | C3 | PRP | 149 | 45.358 | 38.823 | 33.375 | 1.00 | 0.00 |
| C      |      |    |     |     |        |        |        |      |      |
| HETATM | 3031 | H6 | PRP | 149 | 46.445 | 38.818 | 33.457 | 1.00 | 0.00 |
| H      |      |    |     |     |        |        |        |      |      |
| HETATM | 3032 | H7 | PRP | 149 | 44.963 | 39.838 | 33.344 | 1.00 | 0.00 |
| H      |      |    |     |     |        |        |        |      |      |
| HETATM | 3033 | H8 | PRP | 149 | 44.948 | 38.275 | 34.223 | 1.00 | 0.00 |
| H      |      |    |     |     |        |        |        |      |      |
| HETATM | 3034 | O1 | PRP | 150 | 40.532 | 25.288 | 35.995 | 1.00 | 0.00 |
| O      |      |    |     |     |        |        |        |      |      |
| HETATM | 3035 | H1 | PRP | 150 | 39.624 | 25.479 | 35.751 | 1.00 | 0.00 |
| H      |      |    |     |     |        |        |        |      |      |
| HETATM | 3036 | C1 | PRP | 150 | 41.297 | 25.656 | 34.932 | 1.00 | 0.00 |
| C      |      |    |     |     |        |        |        |      |      |
| HETATM | 3037 | H2 | PRP | 150 | 42.373 | 25.589 | 35.093 | 1.00 | 0.00 |
| H      |      |    |     |     |        |        |        |      |      |
| HETATM | 3038 | H3 | PRP | 150 | 41.104 | 24.858 | 34.216 | 1.00 | 0.00 |
| H      |      |    |     |     |        |        |        |      |      |
| HETATM | 3039 | C2 | PRP | 150 | 41.053 | 27.010 | 34.288 | 1.00 | 0.00 |
| C      |      |    |     |     |        |        |        |      |      |
| HETATM | 3040 | H4 | PRP | 150 | 40.863 | 27.805 | 35.009 | 1.00 | 0.00 |
| H      |      |    |     |     |        |        |        |      |      |
| HETATM | 3041 | O2 | PRP | 150 | 39.902 | 26.772 | 33.509 | 1.00 | 0.00 |
| O      |      |    |     |     |        |        |        |      |      |
| HETATM | 3042 | H5 | PRP | 150 | 39.929 | 27.409 | 32.791 | 1.00 | 0.00 |
| H      |      |    |     |     |        |        |        |      |      |
| HETATM | 3043 | C3 | PRP | 150 | 42.148 | 27.550 | 33.349 | 1.00 | 0.00 |
| C      |      |    |     |     |        |        |        |      |      |
| HETATM | 3044 | H6 | PRP | 150 | 42.167 | 27.027 | 32.393 | 1.00 | 0.00 |
| H      |      |    |     |     |        |        |        |      |      |
| HETATM | 3045 | H7 | PRP | 150 | 41.837 | 28.594 | 33.306 | 1.00 | 0.00 |
| H      |      |    |     |     |        |        |        |      |      |
| HETATM | 3046 | H8 | PRP | 150 | 43.129 | 27.460 | 33.816 | 1.00 | 0.00 |
| H      |      |    |     |     |        |        |        |      |      |
| HETATM | 3047 | O1 | PRP | 151 | 41.143 | 24.774 | 25.438 | 1.00 | 0.00 |
| O      |      |    |     |     |        |        |        |      |      |
| HETATM | 3048 | H1 | PRP | 151 | 41.373 | 23.862 | 25.627 | 1.00 | 0.00 |
| H      |      |    |     |     |        |        |        |      |      |
| HETATM | 3049 | C1 | PRP | 151 | 42.237 | 25.578 | 25.824 | 1.00 | 0.00 |
| C      |      |    |     |     |        |        |        |      |      |
| HETATM | 3050 | H2 | PRP | 151 | 42.696 | 25.196 | 26.736 | 1.00 | 0.00 |
| H      |      |    |     |     |        |        |        |      |      |
| HETATM | 3051 | H3 | PRP | 151 | 43.006 | 25.456 | 25.061 | 1.00 | 0.00 |
| H      |      |    |     |     |        |        |        |      |      |



|        |      |    |     |     |        |        |        |      |      |
|--------|------|----|-----|-----|--------|--------|--------|------|------|
| HETATM | 3052 | C2 | PRP | 151 | 41.710 | 27.027 | 26.116 | 1.00 | 0.00 |
| C      |      |    |     |     |        |        |        |      |      |
| HETATM | 3053 | H4 | PRP | 151 | 40.780 | 26.933 | 26.676 | 1.00 | 0.00 |
| H      |      |    |     |     |        |        |        |      |      |
| HETATM | 3054 | O2 | PRP | 151 | 41.400 | 27.874 | 24.956 | 1.00 | 0.00 |
| O      |      |    |     |     |        |        |        |      |      |
| HETATM | 3055 | H5 | PRP | 151 | 42.006 | 27.599 | 24.264 | 1.00 | 0.00 |
| H      |      |    |     |     |        |        |        |      |      |
| HETATM | 3056 | C3 | PRP | 151 | 42.755 | 27.800 | 26.945 | 1.00 | 0.00 |
| C      |      |    |     |     |        |        |        |      |      |
| HETATM | 3057 | H6 | PRP | 151 | 43.212 | 27.187 | 27.722 | 1.00 | 0.00 |
| H      |      |    |     |     |        |        |        |      |      |
| HETATM | 3058 | H7 | PRP | 151 | 43.574 | 28.121 | 26.301 | 1.00 | 0.00 |
| H      |      |    |     |     |        |        |        |      |      |
| HETATM | 3059 | H8 | PRP | 151 | 42.442 | 28.656 | 27.542 | 1.00 | 0.00 |
| H      |      |    |     |     |        |        |        |      |      |
| HETATM | 3060 | O1 | PRP | 152 | 42.691 | 19.933 | 30.125 | 1.00 | 0.00 |
| O      |      |    |     |     |        |        |        |      |      |
| HETATM | 3061 | H1 | PRP | 152 | 41.928 | 19.350 | 30.127 | 1.00 | 0.00 |
| H      |      |    |     |     |        |        |        |      |      |
| HETATM | 3062 | C1 | PRP | 152 | 43.333 | 19.663 | 31.411 | 1.00 | 0.00 |
| C      |      |    |     |     |        |        |        |      |      |
| HETATM | 3063 | H2 | PRP | 152 | 43.730 | 18.648 | 31.416 | 1.00 | 0.00 |
| H      |      |    |     |     |        |        |        |      |      |
| HETATM | 3064 | H3 | PRP | 152 | 44.104 | 20.423 | 31.538 | 1.00 | 0.00 |
| H      |      |    |     |     |        |        |        |      |      |
| HETATM | 3065 | C2 | PRP | 152 | 42.272 | 19.903 | 32.418 | 1.00 | 0.00 |
| C      |      |    |     |     |        |        |        |      |      |
| HETATM | 3066 | H4 | PRP | 152 | 42.633 | 19.597 | 33.400 | 1.00 | 0.00 |
| H      |      |    |     |     |        |        |        |      |      |
| HETATM | 3067 | O2 | PRP | 152 | 41.185 | 19.120 | 32.039 | 1.00 | 0.00 |
| O      |      |    |     |     |        |        |        |      |      |
| HETATM | 3068 | H5 | PRP | 152 | 40.718 | 18.931 | 32.857 | 1.00 | 0.00 |
| H      |      |    |     |     |        |        |        |      |      |
| HETATM | 3069 | C3 | PRP | 152 | 41.856 | 21.345 | 32.584 | 1.00 | 0.00 |
| C      |      |    |     |     |        |        |        |      |      |
| HETATM | 3070 | H6 | PRP | 152 | 41.008 | 21.508 | 33.250 | 1.00 | 0.00 |
| H      |      |    |     |     |        |        |        |      |      |
| HETATM | 3071 | H7 | PRP | 152 | 42.697 | 21.926 | 32.963 | 1.00 | 0.00 |
| H      |      |    |     |     |        |        |        |      |      |
| HETATM | 3072 | H8 | PRP | 152 | 41.610 | 21.672 | 31.573 | 1.00 | 0.00 |
| H      |      |    |     |     |        |        |        |      |      |
| HETATM | 3073 | O1 | PRP | 153 | 44.370 | 48.140 | 42.275 | 1.00 | 0.00 |
| O      |      |    |     |     |        |        |        |      |      |
| HETATM | 3074 | H1 | PRP | 153 | 44.306 | 48.751 | 43.013 | 1.00 | 0.00 |
| H      |      |    |     |     |        |        |        |      |      |
| HETATM | 3075 | C1 | PRP | 153 | 44.527 | 46.873 | 42.941 | 1.00 | 0.00 |
| C      |      |    |     |     |        |        |        |      |      |
| HETATM | 3076 | H2 | PRP | 153 | 44.298 | 46.147 | 42.161 | 1.00 | 0.00 |
| H      |      |    |     |     |        |        |        |      |      |
| HETATM | 3077 | H3 | PRP | 153 | 45.540 | 46.658 | 43.281 | 1.00 | 0.00 |
| H      |      |    |     |     |        |        |        |      |      |
| HETATM | 3078 | C2 | PRP | 153 | 43.529 | 46.679 | 44.068 | 1.00 | 0.00 |
| C      |      |    |     |     |        |        |        |      |      |
| HETATM | 3079 | H4 | PRP | 153 | 42.524 | 46.796 | 43.663 | 1.00 | 0.00 |
| H      |      |    |     |     |        |        |        |      |      |

|        |      |    |     |     |        |        |        |      |      |
|--------|------|----|-----|-----|--------|--------|--------|------|------|
| HETATM | 3080 | O2 | PRP | 153 | 43.722 | 47.648 | 45.073 | 1.00 | 0.00 |
| O      |      |    |     |     |        |        |        |      |      |
| HETATM | 3081 | H5 | PRP | 153 | 43.051 | 47.524 | 45.749 | 1.00 | 0.00 |
| H      |      |    |     |     |        |        |        |      |      |
| HETATM | 3082 | C3 | PRP | 153 | 43.828 | 45.327 | 44.683 | 1.00 | 0.00 |
| C      |      |    |     |     |        |        |        |      |      |
| HETATM | 3083 | H6 | PRP | 153 | 44.843 | 45.228 | 45.066 | 1.00 | 0.00 |
| H      |      |    |     |     |        |        |        |      |      |
| HETATM | 3084 | H7 | PRP | 153 | 43.072 | 45.122 | 45.441 | 1.00 | 0.00 |
| H      |      |    |     |     |        |        |        |      |      |
| HETATM | 3085 | H8 | PRP | 153 | 43.684 | 44.581 | 43.902 | 1.00 | 0.00 |
| H      |      |    |     |     |        |        |        |      |      |
| HETATM | 3086 | O1 | PRP | 154 | 36.633 | 31.228 | 41.124 | 1.00 | 0.00 |
| O      |      |    |     |     |        |        |        |      |      |
| HETATM | 3087 | H1 | PRP | 154 | 36.285 | 30.723 | 41.863 | 1.00 | 0.00 |
| H      |      |    |     |     |        |        |        |      |      |
| HETATM | 3088 | C1 | PRP | 154 | 37.191 | 32.346 | 41.564 | 1.00 | 0.00 |
| C      |      |    |     |     |        |        |        |      |      |
| HETATM | 3089 | H2 | PRP | 154 | 36.321 | 32.918 | 41.886 | 1.00 | 0.00 |
| H      |      |    |     |     |        |        |        |      |      |
| HETATM | 3090 | H3 | PRP | 154 | 37.811 | 32.029 | 42.403 | 1.00 | 0.00 |
| H      |      |    |     |     |        |        |        |      |      |
| HETATM | 3091 | C2 | PRP | 154 | 37.986 | 33.022 | 40.431 | 1.00 | 0.00 |
| C      |      |    |     |     |        |        |        |      |      |
| HETATM | 3092 | H4 | PRP | 154 | 38.364 | 33.980 | 40.789 | 1.00 | 0.00 |
| H      |      |    |     |     |        |        |        |      |      |
| HETATM | 3093 | O2 | PRP | 154 | 36.982 | 33.084 | 39.352 | 1.00 | 0.00 |
| O      |      |    |     |     |        |        |        |      |      |
| HETATM | 3094 | H5 | PRP | 154 | 36.629 | 32.221 | 39.125 | 1.00 | 0.00 |
| H      |      |    |     |     |        |        |        |      |      |
| HETATM | 3095 | C3 | PRP | 154 | 39.146 | 32.136 | 39.837 | 1.00 | 0.00 |
| C      |      |    |     |     |        |        |        |      |      |
| HETATM | 3096 | H6 | PRP | 154 | 38.781 | 31.205 | 39.403 | 1.00 | 0.00 |
| H      |      |    |     |     |        |        |        |      |      |
| HETATM | 3097 | H7 | PRP | 154 | 39.704 | 32.753 | 39.132 | 1.00 | 0.00 |
| H      |      |    |     |     |        |        |        |      |      |
| HETATM | 3098 | H8 | PRP | 154 | 39.758 | 31.719 | 40.637 | 1.00 | 0.00 |
| H      |      |    |     |     |        |        |        |      |      |
| HETATM | 3099 | O1 | PRP | 155 | 39.985 | 45.363 | 42.033 | 1.00 | 0.00 |
| O      |      |    |     |     |        |        |        |      |      |
| HETATM | 3100 | H1 | PRP | 155 | 40.390 | 45.975 | 41.414 | 1.00 | 0.00 |
| H      |      |    |     |     |        |        |        |      |      |
| HETATM | 3101 | C1 | PRP | 155 | 40.886 | 44.307 | 42.116 | 1.00 | 0.00 |
| C      |      |    |     |     |        |        |        |      |      |
| HETATM | 3102 | H2 | PRP | 155 | 41.887 | 44.657 | 42.367 | 1.00 | 0.00 |
| H      |      |    |     |     |        |        |        |      |      |
| HETATM | 3103 | H3 | PRP | 155 | 40.561 | 43.566 | 42.847 | 1.00 | 0.00 |
| H      |      |    |     |     |        |        |        |      |      |
| HETATM | 3104 | C2 | PRP | 155 | 40.995 | 43.618 | 40.766 | 1.00 | 0.00 |
| C      |      |    |     |     |        |        |        |      |      |
| HETATM | 3105 | H4 | PRP | 155 | 41.169 | 44.301 | 39.935 | 1.00 | 0.00 |
| H      |      |    |     |     |        |        |        |      |      |
| HETATM | 3106 | O2 | PRP | 155 | 39.752 | 42.932 | 40.624 | 1.00 | 0.00 |
| O      |      |    |     |     |        |        |        |      |      |
| HETATM | 3107 | H5 | PRP | 155 | 39.041 | 43.577 | 40.636 | 1.00 | 0.00 |
| H      |      |    |     |     |        |        |        |      |      |

|        |      |    |     |     |        |        |        |      |      |
|--------|------|----|-----|-----|--------|--------|--------|------|------|
| HETATM | 3108 | C3 | PRP | 155 | 41.967 | 42.430 | 40.777 | 1.00 | 0.00 |
| C      |      |    |     |     |        |        |        |      |      |
| HETATM | 3109 | H6 | PRP | 155 | 41.620 | 41.605 | 41.399 | 1.00 | 0.00 |
| H      |      |    |     |     |        |        |        |      |      |
| HETATM | 3110 | H7 | PRP | 155 | 42.082 | 42.022 | 39.773 | 1.00 | 0.00 |
| H      |      |    |     |     |        |        |        |      |      |
| HETATM | 3111 | H8 | PRP | 155 | 42.956 | 42.737 | 41.120 | 1.00 | 0.00 |
| H      |      |    |     |     |        |        |        |      |      |
| HETATM | 3112 | O1 | PRP | 156 | 36.379 | 32.316 | 35.943 | 1.00 | 0.00 |
| O      |      |    |     |     |        |        |        |      |      |
| HETATM | 3113 | H1 | PRP | 156 | 36.311 | 32.404 | 34.989 | 1.00 | 0.00 |
| H      |      |    |     |     |        |        |        |      |      |
| HETATM | 3114 | C1 | PRP | 156 | 37.712 | 32.062 | 36.369 | 1.00 | 0.00 |
| C      |      |    |     |     |        |        |        |      |      |
| HETATM | 3115 | H2 | PRP | 156 | 38.372 | 32.810 | 35.928 | 1.00 | 0.00 |
| H      |      |    |     |     |        |        |        |      |      |
| HETATM | 3116 | H3 | PRP | 156 | 37.739 | 32.195 | 37.450 | 1.00 | 0.00 |
| H      |      |    |     |     |        |        |        |      |      |
| HETATM | 3117 | C2 | PRP | 156 | 38.166 | 30.693 | 36.003 | 1.00 | 0.00 |
| C      |      |    |     |     |        |        |        |      |      |
| HETATM | 3118 | H4 | PRP | 156 | 37.813 | 30.424 | 35.007 | 1.00 | 0.00 |
| H      |      |    |     |     |        |        |        |      |      |
| HETATM | 3119 | O2 | PRP | 156 | 37.720 | 29.745 | 36.924 | 1.00 | 0.00 |
| O      |      |    |     |     |        |        |        |      |      |
| HETATM | 3120 | H5 | PRP | 156 | 36.809 | 29.921 | 37.171 | 1.00 | 0.00 |
| H      |      |    |     |     |        |        |        |      |      |
| HETATM | 3121 | C3 | PRP | 156 | 39.693 | 30.660 | 36.209 | 1.00 | 0.00 |
| C      |      |    |     |     |        |        |        |      |      |
| HETATM | 3122 | H6 | PRP | 156 | 40.140 | 31.434 | 35.586 | 1.00 | 0.00 |
| H      |      |    |     |     |        |        |        |      |      |
| HETATM | 3123 | H7 | PRP | 156 | 39.973 | 30.897 | 37.236 | 1.00 | 0.00 |
| H      |      |    |     |     |        |        |        |      |      |
| HETATM | 3124 | H8 | PRP | 156 | 40.101 | 29.667 | 36.016 | 1.00 | 0.00 |
| H      |      |    |     |     |        |        |        |      |      |
| HETATM | 3125 | O1 | PRP | 157 | 51.645 | 29.248 | 27.957 | 1.00 | 0.00 |
| O      |      |    |     |     |        |        |        |      |      |
| HETATM | 3126 | H1 | PRP | 157 | 50.803 | 29.471 | 27.553 | 1.00 | 0.00 |
| H      |      |    |     |     |        |        |        |      |      |
| HETATM | 3127 | C1 | PRP | 157 | 52.481 | 29.122 | 26.822 | 1.00 | 0.00 |
| C      |      |    |     |     |        |        |        |      |      |
| HETATM | 3128 | H2 | PRP | 157 | 52.456 | 30.049 | 26.250 | 1.00 | 0.00 |
| H      |      |    |     |     |        |        |        |      |      |
| HETATM | 3129 | H3 | PRP | 157 | 53.518 | 29.029 | 27.147 | 1.00 | 0.00 |
| H      |      |    |     |     |        |        |        |      |      |
| HETATM | 3130 | C2 | PRP | 157 | 52.155 | 28.009 | 25.911 | 1.00 | 0.00 |
| C      |      |    |     |     |        |        |        |      |      |
| HETATM | 3131 | H4 | PRP | 157 | 52.929 | 27.971 | 25.145 | 1.00 | 0.00 |
| H      |      |    |     |     |        |        |        |      |      |
| HETATM | 3132 | O2 | PRP | 157 | 50.939 | 28.285 | 25.374 | 1.00 | 0.00 |
| O      |      |    |     |     |        |        |        |      |      |
| HETATM | 3133 | H5 | PRP | 157 | 50.568 | 27.570 | 24.852 | 1.00 | 0.00 |
| H      |      |    |     |     |        |        |        |      |      |
| HETATM | 3134 | C3 | PRP | 157 | 51.982 | 26.644 | 26.718 | 1.00 | 0.00 |
| C      |      |    |     |     |        |        |        |      |      |
| HETATM | 3135 | H6 | PRP | 157 | 52.820 | 26.405 | 27.374 | 1.00 | 0.00 |
| H      |      |    |     |     |        |        |        |      |      |

|        |      |    |     |     |        |        |        |      |      |
|--------|------|----|-----|-----|--------|--------|--------|------|------|
| HETATM | 3136 | H7 | PRP | 157 | 51.116 | 26.670 | 27.380 | 1.00 | 0.00 |
| H      |      |    |     |     |        |        |        |      |      |
| HETATM | 3137 | H8 | PRP | 157 | 51.891 | 25.803 | 26.031 | 1.00 | 0.00 |
| H      |      |    |     |     |        |        |        |      |      |
| HETATM | 3138 | O1 | PRP | 158 | 43.742 | 37.640 | 40.417 | 1.00 | 0.00 |
| O      |      |    |     |     |        |        |        |      |      |
| HETATM | 3139 | H1 | PRP | 158 | 42.847 | 37.414 | 40.155 | 1.00 | 0.00 |
| H      |      |    |     |     |        |        |        |      |      |
| HETATM | 3140 | C1 | PRP | 158 | 44.273 | 36.643 | 41.114 | 1.00 | 0.00 |
| C      |      |    |     |     |        |        |        |      |      |
| HETATM | 3141 | H2 | PRP | 158 | 45.330 | 36.776 | 41.344 | 1.00 | 0.00 |
| H      |      |    |     |     |        |        |        |      |      |
| HETATM | 3142 | H3 | PRP | 158 | 43.850 | 36.610 | 42.118 | 1.00 | 0.00 |
| H      |      |    |     |     |        |        |        |      |      |
| HETATM | 3143 | C2 | PRP | 158 | 44.124 | 35.371 | 40.293 | 1.00 | 0.00 |
| C      |      |    |     |     |        |        |        |      |      |
| HETATM | 3144 | H4 | PRP | 158 | 44.128 | 35.461 | 39.207 | 1.00 | 0.00 |
| H      |      |    |     |     |        |        |        |      |      |
| HETATM | 3145 | O2 | PRP | 158 | 42.785 | 34.940 | 40.617 | 1.00 | 0.00 |
| O      |      |    |     |     |        |        |        |      |      |
| HETATM | 3146 | H5 | PRP | 158 | 42.160 | 35.199 | 39.936 | 1.00 | 0.00 |
| H      |      |    |     |     |        |        |        |      |      |
| HETATM | 3147 | C3 | PRP | 158 | 44.988 | 34.164 | 40.928 | 1.00 | 0.00 |
| C      |      |    |     |     |        |        |        |      |      |
| HETATM | 3148 | H6 | PRP | 158 | 44.782 | 33.250 | 40.370 | 1.00 | 0.00 |
| H      |      |    |     |     |        |        |        |      |      |
| HETATM | 3149 | H7 | PRP | 158 | 46.051 | 34.400 | 40.882 | 1.00 | 0.00 |
| H      |      |    |     |     |        |        |        |      |      |
| HETATM | 3150 | H8 | PRP | 158 | 44.662 | 34.032 | 41.960 | 1.00 | 0.00 |
| H      |      |    |     |     |        |        |        |      |      |
| HETATM | 3151 | O1 | PRP | 159 | 32.767 | 31.681 | 56.370 | 1.00 | 0.00 |
| O      |      |    |     |     |        |        |        |      |      |
| HETATM | 3152 | H1 | PRP | 159 | 33.085 | 32.161 | 57.139 | 1.00 | 0.00 |
| H      |      |    |     |     |        |        |        |      |      |
| HETATM | 3153 | C1 | PRP | 159 | 32.018 | 30.537 | 56.918 | 1.00 | 0.00 |
| C      |      |    |     |     |        |        |        |      |      |
| HETATM | 3154 | H2 | PRP | 159 | 31.896 | 29.810 | 56.115 | 1.00 | 0.00 |
| H      |      |    |     |     |        |        |        |      |      |
| HETATM | 3155 | H3 | PRP | 159 | 32.573 | 30.009 | 57.694 | 1.00 | 0.00 |
| H      |      |    |     |     |        |        |        |      |      |
| HETATM | 3156 | C2 | PRP | 159 | 30.635 | 30.981 | 57.447 | 1.00 | 0.00 |
| C      |      |    |     |     |        |        |        |      |      |
| HETATM | 3157 | H4 | PRP | 159 | 30.096 | 31.262 | 56.542 | 1.00 | 0.00 |
| H      |      |    |     |     |        |        |        |      |      |
| HETATM | 3158 | O2 | PRP | 159 | 30.750 | 32.014 | 58.429 | 1.00 | 0.00 |
| O      |      |    |     |     |        |        |        |      |      |
| HETATM | 3159 | H5 | PRP | 159 | 31.024 | 32.831 | 58.005 | 1.00 | 0.00 |
| H      |      |    |     |     |        |        |        |      |      |
| HETATM | 3160 | C3 | PRP | 159 | 29.826 | 29.776 | 58.022 | 1.00 | 0.00 |
| C      |      |    |     |     |        |        |        |      |      |
| HETATM | 3161 | H6 | PRP | 159 | 30.002 | 29.590 | 59.081 | 1.00 | 0.00 |
| H      |      |    |     |     |        |        |        |      |      |
| HETATM | 3162 | H7 | PRP | 159 | 28.759 | 30.000 | 57.989 | 1.00 | 0.00 |
| H      |      |    |     |     |        |        |        |      |      |
| HETATM | 3163 | H8 | PRP | 159 | 30.034 | 28.879 | 57.439 | 1.00 | 0.00 |
| H      |      |    |     |     |        |        |        |      |      |

|        |      |    |     |     |        |        |        |      |      |
|--------|------|----|-----|-----|--------|--------|--------|------|------|
| HETATM | 3164 | O1 | PRP | 160 | 40.220 | 33.347 | 33.331 | 1.00 | 0.00 |
| O      |      |    |     |     |        |        |        |      |      |
| HETATM | 3165 | H1 | PRP | 160 | 39.372 | 33.286 | 32.886 | 1.00 | 0.00 |
| H      |      |    |     |     |        |        |        |      |      |
| HETATM | 3166 | C1 | PRP | 160 | 40.598 | 34.723 | 33.435 | 1.00 | 0.00 |
| C      |      |    |     |     |        |        |        |      |      |
| HETATM | 3167 | H2 | PRP | 160 | 41.010 | 34.907 | 34.428 | 1.00 | 0.00 |
| H      |      |    |     |     |        |        |        |      |      |
| HETATM | 3168 | H3 | PRP | 160 | 41.316 | 35.105 | 32.710 | 1.00 | 0.00 |
| H      |      |    |     |     |        |        |        |      |      |
| HETATM | 3169 | C2 | PRP | 160 | 39.210 | 35.390 | 33.435 | 1.00 | 0.00 |
| C      |      |    |     |     |        |        |        |      |      |
| HETATM | 3170 | H4 | PRP | 160 | 38.688 | 35.137 | 34.357 | 1.00 | 0.00 |
| H      |      |    |     |     |        |        |        |      |      |
| HETATM | 3171 | O2 | PRP | 160 | 38.370 | 35.204 | 32.270 | 1.00 | 0.00 |
| O      |      |    |     |     |        |        |        |      |      |
| HETATM | 3172 | H5 | PRP | 160 | 37.671 | 34.562 | 32.414 | 1.00 | 0.00 |
| H      |      |    |     |     |        |        |        |      |      |
| HETATM | 3173 | C3 | PRP | 160 | 39.365 | 36.863 | 33.463 | 1.00 | 0.00 |
| C      |      |    |     |     |        |        |        |      |      |
| HETATM | 3174 | H6 | PRP | 160 | 38.455 | 37.402 | 33.727 | 1.00 | 0.00 |
| H      |      |    |     |     |        |        |        |      |      |
| HETATM | 3175 | H7 | PRP | 160 | 40.069 | 37.184 | 34.231 | 1.00 | 0.00 |
| H      |      |    |     |     |        |        |        |      |      |
| HETATM | 3176 | H8 | PRP | 160 | 39.652 | 37.210 | 32.471 | 1.00 | 0.00 |
| H      |      |    |     |     |        |        |        |      |      |
| HETATM | 3177 | O1 | PRP | 161 | 38.571 | 28.470 | 24.582 | 1.00 | 0.00 |
| O      |      |    |     |     |        |        |        |      |      |
| HETATM | 3178 | H1 | PRP | 161 | 39.506 | 28.256 | 24.546 | 1.00 | 0.00 |
| H      |      |    |     |     |        |        |        |      |      |
| HETATM | 3179 | C1 | PRP | 161 | 37.814 | 27.791 | 23.619 | 1.00 | 0.00 |
| C      |      |    |     |     |        |        |        |      |      |
| HETATM | 3180 | H2 | PRP | 161 | 36.825 | 28.147 | 23.909 | 1.00 | 0.00 |
| H      |      |    |     |     |        |        |        |      |      |
| HETATM | 3181 | H3 | PRP | 161 | 38.001 | 28.102 | 22.591 | 1.00 | 0.00 |
| H      |      |    |     |     |        |        |        |      |      |
| HETATM | 3182 | C2 | PRP | 161 | 37.867 | 26.238 | 23.681 | 1.00 | 0.00 |
| C      |      |    |     |     |        |        |        |      |      |
| HETATM | 3183 | H4 | PRP | 161 | 37.263 | 25.874 | 24.512 | 1.00 | 0.00 |
| H      |      |    |     |     |        |        |        |      |      |
| HETATM | 3184 | O2 | PRP | 161 | 39.149 | 25.707 | 23.675 | 1.00 | 0.00 |
| O      |      |    |     |     |        |        |        |      |      |
| HETATM | 3185 | H5 | PRP | 161 | 39.365 | 25.631 | 24.607 | 1.00 | 0.00 |
| H      |      |    |     |     |        |        |        |      |      |
| HETATM | 3186 | C3 | PRP | 161 | 37.228 | 25.768 | 22.437 | 1.00 | 0.00 |
| C      |      |    |     |     |        |        |        |      |      |
| HETATM | 3187 | H6 | PRP | 161 | 36.971 | 24.709 | 22.462 | 1.00 | 0.00 |
| H      |      |    |     |     |        |        |        |      |      |
| HETATM | 3188 | H7 | PRP | 161 | 36.281 | 26.301 | 22.341 | 1.00 | 0.00 |
| H      |      |    |     |     |        |        |        |      |      |
| HETATM | 3189 | H8 | PRP | 161 | 37.756 | 26.106 | 21.545 | 1.00 | 0.00 |
| H      |      |    |     |     |        |        |        |      |      |
| HETATM | 3190 | O1 | PRP | 162 | 52.132 | 22.850 | 48.548 | 1.00 | 0.00 |
| O      |      |    |     |     |        |        |        |      |      |
| HETATM | 3191 | H1 | PRP | 162 | 51.932 | 23.319 | 47.734 | 1.00 | 0.00 |
| H      |      |    |     |     |        |        |        |      |      |

|        |      |    |     |     |        |        |        |      |      |
|--------|------|----|-----|-----|--------|--------|--------|------|------|
| HETATM | 3192 | C1 | PRP | 162 | 50.907 | 22.774 | 49.297 | 1.00 | 0.00 |
| C      |      |    |     |     |        |        |        |      |      |
| HETATM | 3193 | H2 | PRP | 162 | 50.251 | 21.926 | 49.101 | 1.00 | 0.00 |
| H      |      |    |     |     |        |        |        |      |      |
| HETATM | 3194 | H3 | PRP | 162 | 51.228 | 22.748 | 50.339 | 1.00 | 0.00 |
| H      |      |    |     |     |        |        |        |      |      |
| HETATM | 3195 | C2 | PRP | 162 | 50.049 | 24.000 | 49.203 | 1.00 | 0.00 |
| C      |      |    |     |     |        |        |        |      |      |
| HETATM | 3196 | H4 | PRP | 162 | 49.486 | 24.274 | 50.096 | 1.00 | 0.00 |
| H      |      |    |     |     |        |        |        |      |      |
| HETATM | 3197 | O2 | PRP | 162 | 49.134 | 23.850 | 48.110 | 1.00 | 0.00 |
| O      |      |    |     |     |        |        |        |      |      |
| HETATM | 3198 | H5 | PRP | 162 | 48.242 | 24.042 | 48.410 | 1.00 | 0.00 |
| H      |      |    |     |     |        |        |        |      |      |
| HETATM | 3199 | C3 | PRP | 162 | 50.846 | 25.310 | 48.915 | 1.00 | 0.00 |
| C      |      |    |     |     |        |        |        |      |      |
| HETATM | 3200 | H6 | PRP | 162 | 51.272 | 25.354 | 47.913 | 1.00 | 0.00 |
| H      |      |    |     |     |        |        |        |      |      |
| HETATM | 3201 | H7 | PRP | 162 | 50.151 | 26.146 | 48.836 | 1.00 | 0.00 |
| H      |      |    |     |     |        |        |        |      |      |
| HETATM | 3202 | H8 | PRP | 162 | 51.637 | 25.564 | 49.620 | 1.00 | 0.00 |
| H      |      |    |     |     |        |        |        |      |      |
| HETATM | 3203 | O1 | PRP | 163 | 41.755 | 27.751 | 18.110 | 1.00 | 0.00 |
| O      |      |    |     |     |        |        |        |      |      |
| HETATM | 3204 | H1 | PRP | 163 | 41.362 | 28.324 | 18.773 | 1.00 | 0.00 |
| H      |      |    |     |     |        |        |        |      |      |
| HETATM | 3205 | C1 | PRP | 163 | 40.751 | 27.025 | 17.549 | 1.00 | 0.00 |
| C      |      |    |     |     |        |        |        |      |      |
| HETATM | 3206 | H2 | PRP | 163 | 40.853 | 27.235 | 16.484 | 1.00 | 0.00 |
| H      |      |    |     |     |        |        |        |      |      |
| HETATM | 3207 | H3 | PRP | 163 | 40.991 | 25.964 | 17.614 | 1.00 | 0.00 |
| H      |      |    |     |     |        |        |        |      |      |
| HETATM | 3208 | C2 | PRP | 163 | 39.378 | 27.378 | 18.086 | 1.00 | 0.00 |
| C      |      |    |     |     |        |        |        |      |      |
| HETATM | 3209 | H4 | PRP | 163 | 39.028 | 28.271 | 17.567 | 1.00 | 0.00 |
| H      |      |    |     |     |        |        |        |      |      |
| HETATM | 3210 | O2 | PRP | 163 | 39.326 | 27.665 | 19.456 | 1.00 | 0.00 |
| O      |      |    |     |     |        |        |        |      |      |
| HETATM | 3211 | H5 | PRP | 163 | 39.834 | 26.930 | 19.807 | 1.00 | 0.00 |
| H      |      |    |     |     |        |        |        |      |      |
| HETATM | 3212 | C3 | PRP | 163 | 38.460 | 26.164 | 17.892 | 1.00 | 0.00 |
| C      |      |    |     |     |        |        |        |      |      |
| HETATM | 3213 | H6 | PRP | 163 | 38.506 | 25.408 | 18.676 | 1.00 | 0.00 |
| H      |      |    |     |     |        |        |        |      |      |
| HETATM | 3214 | H7 | PRP | 163 | 37.446 | 26.549 | 18.005 | 1.00 | 0.00 |
| H      |      |    |     |     |        |        |        |      |      |
| HETATM | 3215 | H8 | PRP | 163 | 38.654 | 25.713 | 16.918 | 1.00 | 0.00 |
| H      |      |    |     |     |        |        |        |      |      |
| HETATM | 3216 | O1 | PRP | 164 | 37.811 | 33.657 | 5.227  | 1.00 | 0.00 |
| O      |      |    |     |     |        |        |        |      |      |
| HETATM | 3217 | H1 | PRP | 164 | 37.403 | 32.984 | 4.677  | 1.00 | 0.00 |
| H      |      |    |     |     |        |        |        |      |      |
| HETATM | 3218 | C1 | PRP | 164 | 38.895 | 32.985 | 5.768  | 1.00 | 0.00 |
| C      |      |    |     |     |        |        |        |      |      |
| HETATM | 3219 | H2 | PRP | 164 | 39.805 | 32.825 | 5.190  | 1.00 | 0.00 |
| H      |      |    |     |     |        |        |        |      |      |

|        |      |    |     |     |        |        |        |      |      |
|--------|------|----|-----|-----|--------|--------|--------|------|------|
| HETATM | 3220 | H3 | PRP | 164 | 39.313 | 33.413 | 6.679  | 1.00 | 0.00 |
| H      |      |    |     |     |        |        |        |      |      |
| HETATM | 3221 | C2 | PRP | 164 | 38.425 | 31.569 | 6.262  | 1.00 | 0.00 |
| C      |      |    |     |     |        |        |        |      |      |
| HETATM | 3222 | H4 | PRP | 164 | 39.163 | 31.106 | 6.917  | 1.00 | 0.00 |
| H      |      |    |     |     |        |        |        |      |      |
| HETATM | 3223 | O2 | PRP | 164 | 38.274 | 30.641 | 5.070  | 1.00 | 0.00 |
| O      |      |    |     |     |        |        |        |      |      |
| HETATM | 3224 | H5 | PRP | 164 | 38.105 | 31.184 | 4.296  | 1.00 | 0.00 |
| H      |      |    |     |     |        |        |        |      |      |
| HETATM | 3225 | C3 | PRP | 164 | 37.111 | 31.634 | 7.079  | 1.00 | 0.00 |
| C      |      |    |     |     |        |        |        |      |      |
| HETATM | 3226 | H6 | PRP | 164 | 37.311 | 32.057 | 8.064  | 1.00 | 0.00 |
| H      |      |    |     |     |        |        |        |      |      |
| HETATM | 3227 | H7 | PRP | 164 | 36.291 | 32.169 | 6.600  | 1.00 | 0.00 |
| H      |      |    |     |     |        |        |        |      |      |
| HETATM | 3228 | H8 | PRP | 164 | 36.751 | 30.628 | 7.296  | 1.00 | 0.00 |
| H      |      |    |     |     |        |        |        |      |      |
| HETATM | 3229 | O1 | PRP | 165 | 43.421 | 1.085  | 30.163 | 1.00 | 0.00 |
| O      |      |    |     |     |        |        |        |      |      |
| HETATM | 3230 | H1 | PRP | 165 | 43.879 | 1.671  | 30.770 | 1.00 | 0.00 |
| H      |      |    |     |     |        |        |        |      |      |
| HETATM | 3231 | C1 | PRP | 165 | 42.029 | 1.383  | 30.342 | 1.00 | 0.00 |
| C      |      |    |     |     |        |        |        |      |      |
| HETATM | 3232 | H2 | PRP | 165 | 41.703 | 2.280  | 29.816 | 1.00 | 0.00 |
| H      |      |    |     |     |        |        |        |      |      |
| HETATM | 3233 | H3 | PRP | 165 | 41.423 | 0.563  | 29.956 | 1.00 | 0.00 |
| H      |      |    |     |     |        |        |        |      |      |
| HETATM | 3234 | C2 | PRP | 165 | 41.882 | 1.386  | 31.900 | 1.00 | 0.00 |
| C      |      |    |     |     |        |        |        |      |      |
| HETATM | 3235 | H4 | PRP | 165 | 42.453 | 2.227  | 32.293 | 1.00 | 0.00 |
| H      |      |    |     |     |        |        |        |      |      |
| HETATM | 3236 | O2 | PRP | 165 | 42.224 | 0.124  | 32.454 | 1.00 | 0.00 |
| O      |      |    |     |     |        |        |        |      |      |
| HETATM | 3237 | H5 | PRP | 165 | 42.791 | -0.333 | 31.828 | 1.00 | 0.00 |
| H      |      |    |     |     |        |        |        |      |      |
| HETATM | 3238 | C3 | PRP | 165 | 40.371 | 1.647  | 32.252 | 1.00 | 0.00 |
| C      |      |    |     |     |        |        |        |      |      |
| HETATM | 3239 | H6 | PRP | 165 | 39.851 | 0.765  | 31.878 | 1.00 | 0.00 |
| H      |      |    |     |     |        |        |        |      |      |
| HETATM | 3240 | H7 | PRP | 165 | 40.240 | 1.696  | 33.333 | 1.00 | 0.00 |
| H      |      |    |     |     |        |        |        |      |      |
| HETATM | 3241 | H8 | PRP | 165 | 39.926 | 2.454  | 31.670 | 1.00 | 0.00 |
| H      |      |    |     |     |        |        |        |      |      |
| HETATM | 3242 | O1 | PRP | 166 | 29.475 | -2.769 | 23.807 | 1.00 | 0.00 |
| O      |      |    |     |     |        |        |        |      |      |
| HETATM | 3243 | H1 | PRP | 166 | 29.979 | -2.562 | 24.597 | 1.00 | 0.00 |
| H      |      |    |     |     |        |        |        |      |      |
| HETATM | 3244 | C1 | PRP | 166 | 28.672 | -3.857 | 24.045 | 1.00 | 0.00 |
| C      |      |    |     |     |        |        |        |      |      |
| HETATM | 3245 | H2 | PRP | 166 | 28.133 | -3.601 | 24.956 | 1.00 | 0.00 |
| H      |      |    |     |     |        |        |        |      |      |
| HETATM | 3246 | H3 | PRP | 166 | 27.954 | -3.989 | 23.235 | 1.00 | 0.00 |
| H      |      |    |     |     |        |        |        |      |      |
| HETATM | 3247 | C2 | PRP | 166 | 29.432 | -5.102 | 24.308 | 1.00 | 0.00 |
| C      |      |    |     |     |        |        |        |      |      |

|        |      |    |     |     |        |        |        |      |      |
|--------|------|----|-----|-----|--------|--------|--------|------|------|
| HETATM | 3248 | H4 | PRP | 166 | 28.702 | -5.906 | 24.402 | 1.00 | 0.00 |
| H      |      |    |     |     |        |        |        |      |      |
| HETATM | 3249 | O2 | PRP | 166 | 30.359 | -5.027 | 25.372 | 1.00 | 0.00 |
| O      |      |    |     |     |        |        |        |      |      |
| HETATM | 3250 | H5 | PRP | 166 | 30.436 | -5.913 | 25.733 | 1.00 | 0.00 |
| H      |      |    |     |     |        |        |        |      |      |
| HETATM | 3251 | C3 | PRP | 166 | 30.241 | -5.468 | 23.062 | 1.00 | 0.00 |
| C      |      |    |     |     |        |        |        |      |      |
| HETATM | 3252 | H6 | PRP | 166 | 30.875 | -4.622 | 22.795 | 1.00 | 0.00 |
| H      |      |    |     |     |        |        |        |      |      |
| HETATM | 3253 | H7 | PRP | 166 | 30.905 | -6.320 | 23.214 | 1.00 | 0.00 |
| H      |      |    |     |     |        |        |        |      |      |
| HETATM | 3254 | H8 | PRP | 166 | 29.513 | -5.721 | 22.292 | 1.00 | 0.00 |
| H      |      |    |     |     |        |        |        |      |      |
| HETATM | 3255 | O1 | PRP | 167 | 15.379 | 21.479 | 52.920 | 1.00 | 0.00 |
| O      |      |    |     |     |        |        |        |      |      |
| HETATM | 3256 | H1 | PRP | 167 | 16.217 | 21.703 | 53.331 | 1.00 | 0.00 |
| H      |      |    |     |     |        |        |        |      |      |
| HETATM | 3257 | C1 | PRP | 167 | 15.181 | 20.114 | 53.275 | 1.00 | 0.00 |
| C      |      |    |     |     |        |        |        |      |      |
| HETATM | 3258 | H2 | PRP | 167 | 15.368 | 19.881 | 54.323 | 1.00 | 0.00 |
| H      |      |    |     |     |        |        |        |      |      |
| HETATM | 3259 | H3 | PRP | 167 | 14.113 | 19.917 | 53.188 | 1.00 | 0.00 |
| H      |      |    |     |     |        |        |        |      |      |
| HETATM | 3260 | C2 | PRP | 167 | 15.920 | 19.098 | 52.356 | 1.00 | 0.00 |
| C      |      |    |     |     |        |        |        |      |      |
| HETATM | 3261 | H4 | PRP | 167 | 15.568 | 18.103 | 52.626 | 1.00 | 0.00 |
| H      |      |    |     |     |        |        |        |      |      |
| HETATM | 3262 | O2 | PRP | 167 | 17.381 | 19.065 | 52.594 | 1.00 | 0.00 |
| O      |      |    |     |     |        |        |        |      |      |
| HETATM | 3263 | H5 | PRP | 167 | 17.545 | 18.197 | 52.970 | 1.00 | 0.00 |
| H      |      |    |     |     |        |        |        |      |      |
| HETATM | 3264 | C3 | PRP | 167 | 15.819 | 19.241 | 50.834 | 1.00 | 0.00 |
| C      |      |    |     |     |        |        |        |      |      |
| HETATM | 3265 | H6 | PRP | 167 | 16.421 | 20.067 | 50.456 | 1.00 | 0.00 |
| H      |      |    |     |     |        |        |        |      |      |
| HETATM | 3266 | H7 | PRP | 167 | 16.164 | 18.281 | 50.448 | 1.00 | 0.00 |
| H      |      |    |     |     |        |        |        |      |      |
| HETATM | 3267 | H8 | PRP | 167 | 14.774 | 19.368 | 50.549 | 1.00 | 0.00 |
| H      |      |    |     |     |        |        |        |      |      |
| HETATM | 3268 | O1 | PRP | 168 | 49.769 | -2.010 | 35.380 | 1.00 | 0.00 |
| O      |      |    |     |     |        |        |        |      |      |
| HETATM | 3269 | H1 | PRP | 168 | 49.608 | -2.935 | 35.181 | 1.00 | 0.00 |
| H      |      |    |     |     |        |        |        |      |      |
| HETATM | 3270 | C1 | PRP | 168 | 48.868 | -1.240 | 34.674 | 1.00 | 0.00 |
| C      |      |    |     |     |        |        |        |      |      |
| HETATM | 3271 | H2 | PRP | 168 | 48.961 | -1.562 | 33.637 | 1.00 | 0.00 |
| H      |      |    |     |     |        |        |        |      |      |
| HETATM | 3272 | H3 | PRP | 168 | 47.912 | -1.606 | 35.050 | 1.00 | 0.00 |
| H      |      |    |     |     |        |        |        |      |      |
| HETATM | 3273 | C2 | PRP | 168 | 48.965 | 0.327  | 34.981 | 1.00 | 0.00 |
| C      |      |    |     |     |        |        |        |      |      |
| HETATM | 3274 | H4 | PRP | 168 | 48.261 | 0.887  | 34.364 | 1.00 | 0.00 |
| H      |      |    |     |     |        |        |        |      |      |
| HETATM | 3275 | O2 | PRP | 168 | 50.277 | 0.656  | 34.580 | 1.00 | 0.00 |
| O      |      |    |     |     |        |        |        |      |      |



|        |      |    |     |     |        |        |        |      |      |
|--------|------|----|-----|-----|--------|--------|--------|------|------|
| HETATM | 3276 | H5 | PRP | 168 | 50.827 | 0.159  | 35.189 | 1.00 | 0.00 |
| H      |      |    |     |     |        |        |        |      |      |
| HETATM | 3277 | C3 | PRP | 168 | 48.849 | 0.723  | 36.442 | 1.00 | 0.00 |
| C      |      |    |     |     |        |        |        |      |      |
| HETATM | 3278 | H6 | PRP | 168 | 49.273 | 0.001  | 37.140 | 1.00 | 0.00 |
| H      |      |    |     |     |        |        |        |      |      |
| HETATM | 3279 | H7 | PRP | 168 | 49.246 | 1.711  | 36.676 | 1.00 | 0.00 |
| H      |      |    |     |     |        |        |        |      |      |
| HETATM | 3280 | H8 | PRP | 168 | 47.782 | 0.762  | 36.660 | 1.00 | 0.00 |
| H      |      |    |     |     |        |        |        |      |      |
| HETATM | 3281 | O1 | PRP | 169 | 44.495 | 9.816  | 37.908 | 1.00 | 0.00 |
| O      |      |    |     |     |        |        |        |      |      |
| HETATM | 3282 | H1 | PRP | 169 | 44.520 | 10.633 | 37.404 | 1.00 | 0.00 |
| H      |      |    |     |     |        |        |        |      |      |
| HETATM | 3283 | C1 | PRP | 169 | 44.248 | 10.047 | 39.281 | 1.00 | 0.00 |
| C      |      |    |     |     |        |        |        |      |      |
| HETATM | 3284 | H2 | PRP | 169 | 43.650 | 10.946 | 39.428 | 1.00 | 0.00 |
| H      |      |    |     |     |        |        |        |      |      |
| HETATM | 3285 | H3 | PRP | 169 | 43.635 | 9.223  | 39.646 | 1.00 | 0.00 |
| H      |      |    |     |     |        |        |        |      |      |
| HETATM | 3286 | C2 | PRP | 169 | 45.428 | 10.195 | 40.199 | 1.00 | 0.00 |
| C      |      |    |     |     |        |        |        |      |      |
| HETATM | 3287 | H4 | PRP | 169 | 44.987 | 10.346 | 41.185 | 1.00 | 0.00 |
| H      |      |    |     |     |        |        |        |      |      |
| HETATM | 3288 | O2 | PRP | 169 | 46.225 | 11.316 | 39.747 | 1.00 | 0.00 |
| O      |      |    |     |     |        |        |        |      |      |
| HETATM | 3289 | H5 | PRP | 169 | 46.644 | 10.949 | 38.966 | 1.00 | 0.00 |
| H      |      |    |     |     |        |        |        |      |      |
| HETATM | 3290 | C3 | PRP | 169 | 46.267 | 8.880  | 40.212 | 1.00 | 0.00 |
| C      |      |    |     |     |        |        |        |      |      |
| HETATM | 3291 | H6 | PRP | 169 | 47.153 | 8.992  | 40.838 | 1.00 | 0.00 |
| H      |      |    |     |     |        |        |        |      |      |
| HETATM | 3292 | H7 | PRP | 169 | 45.647 | 8.035  | 40.513 | 1.00 | 0.00 |
| H      |      |    |     |     |        |        |        |      |      |
| HETATM | 3293 | H8 | PRP | 169 | 46.489 | 8.695  | 39.162 | 1.00 | 0.00 |
| H      |      |    |     |     |        |        |        |      |      |
| HETATM | 3294 | O1 | PRP | 170 | 26.055 | 5.115  | 28.245 | 1.00 | 0.00 |
| O      |      |    |     |     |        |        |        |      |      |
| HETATM | 3295 | H1 | PRP | 170 | 26.743 | 4.996  | 27.586 | 1.00 | 0.00 |
| H      |      |    |     |     |        |        |        |      |      |
| HETATM | 3296 | C1 | PRP | 170 | 25.838 | 6.518  | 28.631 | 1.00 | 0.00 |
| C      |      |    |     |     |        |        |        |      |      |
| HETATM | 3297 | H2 | PRP | 170 | 25.630 | 7.104  | 27.736 | 1.00 | 0.00 |
| H      |      |    |     |     |        |        |        |      |      |
| HETATM | 3298 | H3 | PRP | 170 | 24.972 | 6.661  | 29.277 | 1.00 | 0.00 |
| H      |      |    |     |     |        |        |        |      |      |
| HETATM | 3299 | C2 | PRP | 170 | 27.079 | 7.167  | 29.214 | 1.00 | 0.00 |
| C      |      |    |     |     |        |        |        |      |      |
| HETATM | 3300 | H4 | PRP | 170 | 26.757 | 8.093  | 29.690 | 1.00 | 0.00 |
| H      |      |    |     |     |        |        |        |      |      |
| HETATM | 3301 | O2 | PRP | 170 | 28.048 | 7.375  | 28.214 | 1.00 | 0.00 |
| O      |      |    |     |     |        |        |        |      |      |
| HETATM | 3302 | H5 | PRP | 170 | 28.830 | 7.837  | 28.525 | 1.00 | 0.00 |
| H      |      |    |     |     |        |        |        |      |      |
| HETATM | 3303 | C3 | PRP | 170 | 27.769 | 6.411  | 30.373 | 1.00 | 0.00 |
| C      |      |    |     |     |        |        |        |      |      |

|        |      |    |     |     |        |        |        |      |      |
|--------|------|----|-----|-----|--------|--------|--------|------|------|
| HETATM | 3304 | H6 | PRP | 170 | 28.322 | 5.560  | 29.975 | 1.00 | 0.00 |
| H      |      |    |     |     |        |        |        |      |      |
| HETATM | 3305 | H7 | PRP | 170 | 28.420 | 7.089  | 30.925 | 1.00 | 0.00 |
| H      |      |    |     |     |        |        |        |      |      |
| HETATM | 3306 | H8 | PRP | 170 | 26.968 | 6.051  | 31.020 | 1.00 | 0.00 |
| H      |      |    |     |     |        |        |        |      |      |
| HETATM | 3307 | O1 | PRP | 171 | 27.054 | 9.374  | 35.582 | 1.00 | 0.00 |
| O      |      |    |     |     |        |        |        |      |      |
| HETATM | 3308 | H1 | PRP | 171 | 27.169 | 9.380  | 36.535 | 1.00 | 0.00 |
| H      |      |    |     |     |        |        |        |      |      |
| HETATM | 3309 | C1 | PRP | 171 | 27.702 | 10.569 | 35.126 | 1.00 | 0.00 |
| C      |      |    |     |     |        |        |        |      |      |
| HETATM | 3310 | H2 | PRP | 171 | 27.310 | 11.408 | 35.701 | 1.00 | 0.00 |
| H      |      |    |     |     |        |        |        |      |      |
| HETATM | 3311 | H3 | PRP | 171 | 28.762 | 10.619 | 35.373 | 1.00 | 0.00 |
| H      |      |    |     |     |        |        |        |      |      |
| HETATM | 3312 | C2 | PRP | 171 | 27.701 | 10.845 | 33.657 | 1.00 | 0.00 |
| C      |      |    |     |     |        |        |        |      |      |
| HETATM | 3313 | H4 | PRP | 171 | 26.668 | 10.993 | 33.342 | 1.00 | 0.00 |
| H      |      |    |     |     |        |        |        |      |      |
| HETATM | 3314 | O2 | PRP | 171 | 28.313 | 9.802  | 32.943 | 1.00 | 0.00 |
| O      |      |    |     |     |        |        |        |      |      |
| HETATM | 3315 | H5 | PRP | 171 | 28.253 | 9.972  | 32.000 | 1.00 | 0.00 |
| H      |      |    |     |     |        |        |        |      |      |
| HETATM | 3316 | C3 | PRP | 171 | 28.479 | 12.072 | 33.344 | 1.00 | 0.00 |
| C      |      |    |     |     |        |        |        |      |      |
| HETATM | 3317 | H6 | PRP | 171 | 29.535 | 11.818 | 33.436 | 1.00 | 0.00 |
| H      |      |    |     |     |        |        |        |      |      |
| HETATM | 3318 | H7 | PRP | 171 | 28.470 | 12.262 | 32.270 | 1.00 | 0.00 |
| H      |      |    |     |     |        |        |        |      |      |
| HETATM | 3319 | H8 | PRP | 171 | 28.250 | 12.960 | 33.932 | 1.00 | 0.00 |
| H      |      |    |     |     |        |        |        |      |      |
| HETATM | 3320 | O1 | PRP | 172 | 36.199 | 3.114  | 34.844 | 1.00 | 0.00 |
| O      |      |    |     |     |        |        |        |      |      |
| HETATM | 3321 | H1 | PRP | 172 | 35.454 | 2.704  | 34.399 | 1.00 | 0.00 |
| H      |      |    |     |     |        |        |        |      |      |
| HETATM | 3322 | C1 | PRP | 172 | 36.884 | 3.849  | 33.863 | 1.00 | 0.00 |
| C      |      |    |     |     |        |        |        |      |      |
| HETATM | 3323 | H2 | PRP | 172 | 37.723 | 4.339  | 34.357 | 1.00 | 0.00 |
| H      |      |    |     |     |        |        |        |      |      |
| HETATM | 3324 | H3 | PRP | 172 | 37.393 | 3.223  | 33.129 | 1.00 | 0.00 |
| H      |      |    |     |     |        |        |        |      |      |
| HETATM | 3325 | C2 | PRP | 172 | 36.008 | 5.003  | 33.335 | 1.00 | 0.00 |
| C      |      |    |     |     |        |        |        |      |      |
| HETATM | 3326 | H4 | PRP | 172 | 35.542 | 5.364  | 34.253 | 1.00 | 0.00 |
| H      |      |    |     |     |        |        |        |      |      |
| HETATM | 3327 | O2 | PRP | 172 | 35.030 | 4.546  | 32.436 | 1.00 | 0.00 |
| O      |      |    |     |     |        |        |        |      |      |
| HETATM | 3328 | H5 | PRP | 172 | 34.201 | 4.424  | 32.904 | 1.00 | 0.00 |
| H      |      |    |     |     |        |        |        |      |      |
| HETATM | 3329 | C3 | PRP | 172 | 36.902 | 6.102  | 32.766 | 1.00 | 0.00 |
| C      |      |    |     |     |        |        |        |      |      |
| HETATM | 3330 | H6 | PRP | 172 | 36.416 | 7.067  | 32.626 | 1.00 | 0.00 |
| H      |      |    |     |     |        |        |        |      |      |
| HETATM | 3331 | H7 | PRP | 172 | 37.818 | 6.239  | 33.341 | 1.00 | 0.00 |
| H      |      |    |     |     |        |        |        |      |      |

|        |      |    |     |     |        |        |        |      |      |
|--------|------|----|-----|-----|--------|--------|--------|------|------|
| HETATM | 3332 | H8 | PRP | 172 | 37.214 | 5.880  | 31.746 | 1.00 | 0.00 |
| H      |      |    |     |     |        |        |        |      |      |
| HETATM | 3333 | O1 | PRP | 173 | 40.900 | 12.227 | 39.045 | 1.00 | 0.00 |
| O      |      |    |     |     |        |        |        |      |      |
| HETATM | 3334 | H1 | PRP | 173 | 40.506 | 12.332 | 39.914 | 1.00 | 0.00 |
| H      |      |    |     |     |        |        |        |      |      |
| HETATM | 3335 | C1 | PRP | 173 | 39.868 | 12.479 | 38.041 | 1.00 | 0.00 |
| C      |      |    |     |     |        |        |        |      |      |
| HETATM | 3336 | H2 | PRP | 173 | 38.979 | 12.778 | 38.597 | 1.00 | 0.00 |
| H      |      |    |     |     |        |        |        |      |      |
| HETATM | 3337 | H3 | PRP | 173 | 40.142 | 13.353 | 37.449 | 1.00 | 0.00 |
| H      |      |    |     |     |        |        |        |      |      |
| HETATM | 3338 | C2 | PRP | 173 | 39.747 | 11.372 | 37.032 | 1.00 | 0.00 |
| C      |      |    |     |     |        |        |        |      |      |
| HETATM | 3339 | H4 | PRP | 173 | 38.889 | 11.637 | 36.415 | 1.00 | 0.00 |
| H      |      |    |     |     |        |        |        |      |      |
| HETATM | 3340 | O2 | PRP | 173 | 39.519 | 10.138 | 37.697 | 1.00 | 0.00 |
| O      |      |    |     |     |        |        |        |      |      |
| HETATM | 3341 | H5 | PRP | 173 | 39.829 | 10.253 | 38.599 | 1.00 | 0.00 |
| H      |      |    |     |     |        |        |        |      |      |
| HETATM | 3342 | C3 | PRP | 173 | 41.045 | 11.208 | 36.182 | 1.00 | 0.00 |
| C      |      |    |     |     |        |        |        |      |      |
| HETATM | 3343 | H6 | PRP | 173 | 41.096 | 10.199 | 35.772 | 1.00 | 0.00 |
| H      |      |    |     |     |        |        |        |      |      |
| HETATM | 3344 | H7 | PRP | 173 | 41.303 | 12.010 | 35.490 | 1.00 | 0.00 |
| H      |      |    |     |     |        |        |        |      |      |
| HETATM | 3345 | H8 | PRP | 173 | 41.867 | 11.149 | 36.895 | 1.00 | 0.00 |
| H      |      |    |     |     |        |        |        |      |      |
| HETATM | 3346 | O1 | PRP | 174 | 49.722 | 8.823  | 39.077 | 1.00 | 0.00 |
| O      |      |    |     |     |        |        |        |      |      |
| HETATM | 3347 | H1 | PRP | 174 | 49.753 | 8.156  | 39.766 | 1.00 | 0.00 |
| H      |      |    |     |     |        |        |        |      |      |
| HETATM | 3348 | C1 | PRP | 174 | 49.969 | 10.039 | 39.738 | 1.00 | 0.00 |
| C      |      |    |     |     |        |        |        |      |      |
| HETATM | 3349 | H2 | PRP | 174 | 49.101 | 10.689 | 39.625 | 1.00 | 0.00 |
| H      |      |    |     |     |        |        |        |      |      |
| HETATM | 3350 | H3 | PRP | 174 | 50.018 | 9.973  | 40.825 | 1.00 | 0.00 |
| H      |      |    |     |     |        |        |        |      |      |
| HETATM | 3351 | C2 | PRP | 174 | 51.152 | 10.669 | 38.992 | 1.00 | 0.00 |
| C      |      |    |     |     |        |        |        |      |      |
| HETATM | 3352 | H4 | PRP | 174 | 50.960 | 10.741 | 37.922 | 1.00 | 0.00 |
| H      |      |    |     |     |        |        |        |      |      |
| HETATM | 3353 | O2 | PRP | 174 | 52.355 | 9.990  | 39.180 | 1.00 | 0.00 |
| O      |      |    |     |     |        |        |        |      |      |
| HETATM | 3354 | H5 | PRP | 174 | 52.552 | 9.963  | 40.119 | 1.00 | 0.00 |
| H      |      |    |     |     |        |        |        |      |      |
| HETATM | 3355 | C3 | PRP | 174 | 51.244 | 12.059 | 39.584 | 1.00 | 0.00 |
| C      |      |    |     |     |        |        |        |      |      |
| HETATM | 3356 | H6 | PRP | 174 | 51.204 | 11.976 | 40.670 | 1.00 | 0.00 |
| H      |      |    |     |     |        |        |        |      |      |
| HETATM | 3357 | H7 | PRP | 174 | 52.109 | 12.603 | 39.204 | 1.00 | 0.00 |
| H      |      |    |     |     |        |        |        |      |      |
| HETATM | 3358 | H8 | PRP | 174 | 50.306 | 12.557 | 39.338 | 1.00 | 0.00 |
| H      |      |    |     |     |        |        |        |      |      |
| HETATM | 3359 | O1 | PRP | 175 | 39.842 | 11.854 | 28.028 | 1.00 | 0.00 |
| O      |      |    |     |     |        |        |        |      |      |

|        |      |    |     |     |        |        |        |      |      |
|--------|------|----|-----|-----|--------|--------|--------|------|------|
| HETATM | 3360 | H1 | PRP | 175 | 40.098 | 12.018 | 28.939 | 1.00 | 0.00 |
| H      |      |    |     |     |        |        |        |      |      |
| HETATM | 3361 | C1 | PRP | 175 | 38.408 | 11.929 | 28.054 | 1.00 | 0.00 |
| C      |      |    |     |     |        |        |        |      |      |
| HETATM | 3362 | H2 | PRP | 175 | 38.006 | 12.211 | 27.081 | 1.00 | 0.00 |
| H      |      |    |     |     |        |        |        |      |      |
| HETATM | 3363 | H3 | PRP | 175 | 38.005 | 10.986 | 28.424 | 1.00 | 0.00 |
| H      |      |    |     |     |        |        |        |      |      |
| HETATM | 3364 | C2 | PRP | 175 | 37.936 | 13.185 | 28.910 | 1.00 | 0.00 |
| C      |      |    |     |     |        |        |        |      |      |
| HETATM | 3365 | H4 | PRP | 175 | 38.131 | 14.067 | 28.299 | 1.00 | 0.00 |
| H      |      |    |     |     |        |        |        |      |      |
| HETATM | 3366 | O2 | PRP | 175 | 38.466 | 13.409 | 30.217 | 1.00 | 0.00 |
| O      |      |    |     |     |        |        |        |      |      |
| HETATM | 3367 | H5 | PRP | 175 | 37.772 | 13.641 | 30.839 | 1.00 | 0.00 |
| H      |      |    |     |     |        |        |        |      |      |
| HETATM | 3368 | C3 | PRP | 175 | 36.379 | 12.970 | 29.010 | 1.00 | 0.00 |
| C      |      |    |     |     |        |        |        |      |      |
| HETATM | 3369 | H6 | PRP | 175 | 36.018 | 13.847 | 29.546 | 1.00 | 0.00 |
| H      |      |    |     |     |        |        |        |      |      |
| HETATM | 3370 | H7 | PRP | 175 | 35.968 | 12.920 | 28.001 | 1.00 | 0.00 |
| H      |      |    |     |     |        |        |        |      |      |
| HETATM | 3371 | H8 | PRP | 175 | 36.132 | 12.056 | 29.549 | 1.00 | 0.00 |
| H      |      |    |     |     |        |        |        |      |      |
| HETATM | 3372 | O1 | PRP | 176 | 46.939 | 18.775 | 23.992 | 1.00 | 0.00 |
| O      |      |    |     |     |        |        |        |      |      |
| HETATM | 3373 | H1 | PRP | 176 | 47.538 | 18.033 | 24.107 | 1.00 | 0.00 |
| H      |      |    |     |     |        |        |        |      |      |
| HETATM | 3374 | C1 | PRP | 176 | 46.437 | 18.820 | 22.642 | 1.00 | 0.00 |
| C      |      |    |     |     |        |        |        |      |      |
| HETATM | 3375 | H2 | PRP | 176 | 45.843 | 17.938 | 22.400 | 1.00 | 0.00 |
| H      |      |    |     |     |        |        |        |      |      |
| HETATM | 3376 | H3 | PRP | 176 | 45.954 | 19.780 | 22.462 | 1.00 | 0.00 |
| H      |      |    |     |     |        |        |        |      |      |
| HETATM | 3377 | C2 | PRP | 176 | 47.481 | 18.676 | 21.541 | 1.00 | 0.00 |
| C      |      |    |     |     |        |        |        |      |      |
| HETATM | 3378 | H4 | PRP | 176 | 46.859 | 18.846 | 20.663 | 1.00 | 0.00 |
| H      |      |    |     |     |        |        |        |      |      |
| HETATM | 3379 | O2 | PRP | 176 | 48.046 | 17.377 | 21.480 | 1.00 | 0.00 |
| O      |      |    |     |     |        |        |        |      |      |
| HETATM | 3380 | H5 | PRP | 176 | 48.258 | 17.099 | 22.374 | 1.00 | 0.00 |
| H      |      |    |     |     |        |        |        |      |      |
| HETATM | 3381 | C3 | PRP | 176 | 48.381 | 19.887 | 21.620 | 1.00 | 0.00 |
| C      |      |    |     |     |        |        |        |      |      |
| HETATM | 3382 | H6 | PRP | 176 | 47.794 | 20.795 | 21.758 | 1.00 | 0.00 |
| H      |      |    |     |     |        |        |        |      |      |
| HETATM | 3383 | H7 | PRP | 176 | 48.950 | 19.751 | 22.540 | 1.00 | 0.00 |
| H      |      |    |     |     |        |        |        |      |      |
| HETATM | 3384 | H8 | PRP | 176 | 49.055 | 19.838 | 20.764 | 1.00 | 0.00 |
| H      |      |    |     |     |        |        |        |      |      |
| HETATM | 3385 | O1 | PRP | 177 | 32.812 | 2.839  | 15.050 | 1.00 | 0.00 |
| O      |      |    |     |     |        |        |        |      |      |
| HETATM | 3386 | H1 | PRP | 177 | 33.598 | 2.988  | 15.581 | 1.00 | 0.00 |
| H      |      |    |     |     |        |        |        |      |      |
| HETATM | 3387 | C1 | PRP | 177 | 32.696 | 3.782  | 14.027 | 1.00 | 0.00 |
| C      |      |    |     |     |        |        |        |      |      |

|        |      |    |     |     |        |       |        |      |      |
|--------|------|----|-----|-----|--------|-------|--------|------|------|
| HETATM | 3388 | H2 | PRP | 177 | 31.648 | 4.067 | 13.939 | 1.00 | 0.00 |
| H      |      |    |     |     |        |       |        |      |      |
| HETATM | 3389 | H3 | PRP | 177 | 33.159 | 4.744 | 14.245 | 1.00 | 0.00 |
| H      |      |    |     |     |        |       |        |      |      |
| HETATM | 3390 | C2 | PRP | 177 | 33.292 | 3.249 | 12.757 | 1.00 | 0.00 |
| C      |      |    |     |     |        |       |        |      |      |
| HETATM | 3391 | H4 | PRP | 177 | 32.721 | 3.672 | 11.930 | 1.00 | 0.00 |
| H      |      |    |     |     |        |       |        |      |      |
| HETATM | 3392 | O2 | PRP | 177 | 33.299 | 1.771 | 12.812 | 1.00 | 0.00 |
| O      |      |    |     |     |        |       |        |      |      |
| HETATM | 3393 | H5 | PRP | 177 | 33.092 | 1.542 | 13.721 | 1.00 | 0.00 |
| H      |      |    |     |     |        |       |        |      |      |
| HETATM | 3394 | C3 | PRP | 177 | 34.758 | 3.712 | 12.680 | 1.00 | 0.00 |
| C      |      |    |     |     |        |       |        |      |      |
| HETATM | 3395 | H6 | PRP | 177 | 35.360 | 3.290 | 13.485 | 1.00 | 0.00 |
| H      |      |    |     |     |        |       |        |      |      |
| HETATM | 3396 | H7 | PRP | 177 | 35.187 | 3.380 | 11.734 | 1.00 | 0.00 |
| H      |      |    |     |     |        |       |        |      |      |
| HETATM | 3397 | H8 | PRP | 177 | 34.751 | 4.774 | 12.922 | 1.00 | 0.00 |
| H      |      |    |     |     |        |       |        |      |      |
| HETATM | 3398 | O1 | PRP | 178 | 30.733 | 8.645 | 27.643 | 1.00 | 0.00 |
| O      |      |    |     |     |        |       |        |      |      |
| HETATM | 3399 | H1 | PRP | 178 | 30.662 | 9.283 | 26.929 | 1.00 | 0.00 |
| H      |      |    |     |     |        |       |        |      |      |
| HETATM | 3400 | C1 | PRP | 178 | 31.757 | 7.672 | 27.535 | 1.00 | 0.00 |
| C      |      |    |     |     |        |       |        |      |      |
| HETATM | 3401 | H2 | PRP | 178 | 31.391 | 7.162 | 26.644 | 1.00 | 0.00 |
| H      |      |    |     |     |        |       |        |      |      |
| HETATM | 3402 | H3 | PRP | 178 | 32.724 | 8.168 | 27.459 | 1.00 | 0.00 |
| H      |      |    |     |     |        |       |        |      |      |
| HETATM | 3403 | C2 | PRP | 178 | 31.747 | 6.615 | 28.649 | 1.00 | 0.00 |
| C      |      |    |     |     |        |       |        |      |      |
| HETATM | 3404 | H4 | PRP | 178 | 32.681 | 6.056 | 28.584 | 1.00 | 0.00 |
| H      |      |    |     |     |        |       |        |      |      |
| HETATM | 3405 | O2 | PRP | 178 | 30.653 | 5.692 | 28.430 | 1.00 | 0.00 |
| O      |      |    |     |     |        |       |        |      |      |
| HETATM | 3406 | H5 | PRP | 178 | 30.517 | 5.251 | 29.272 | 1.00 | 0.00 |
| H      |      |    |     |     |        |       |        |      |      |
| HETATM | 3407 | C3 | PRP | 178 | 31.759 | 7.263 | 30.000 | 1.00 | 0.00 |
| C      |      |    |     |     |        |       |        |      |      |
| HETATM | 3408 | H6 | PRP | 178 | 30.777 | 7.683 | 30.216 | 1.00 | 0.00 |
| H      |      |    |     |     |        |       |        |      |      |
| HETATM | 3409 | H7 | PRP | 178 | 32.045 | 6.560 | 30.782 | 1.00 | 0.00 |
| H      |      |    |     |     |        |       |        |      |      |
| HETATM | 3410 | H8 | PRP | 178 | 32.456 | 8.100 | 29.968 | 1.00 | 0.00 |
| H      |      |    |     |     |        |       |        |      |      |
| HETATM | 3411 | O1 | PRP | 179 | 42.338 | 3.583 | 34.794 | 1.00 | 0.00 |
| O      |      |    |     |     |        |       |        |      |      |
| HETATM | 3412 | H1 | PRP | 179 | 42.565 | 4.198 | 34.092 | 1.00 | 0.00 |
| H      |      |    |     |     |        |       |        |      |      |
| HETATM | 3413 | C1 | PRP | 179 | 43.387 | 2.618 | 34.982 | 1.00 | 0.00 |
| C      |      |    |     |     |        |       |        |      |      |
| HETATM | 3414 | H2 | PRP | 179 | 43.041 | 1.839 | 35.661 | 1.00 | 0.00 |
| H      |      |    |     |     |        |       |        |      |      |
| HETATM | 3415 | H3 | PRP | 179 | 43.544 | 2.004 | 34.095 | 1.00 | 0.00 |
| H      |      |    |     |     |        |       |        |      |      |

|        |      |    |     |     |        |        |        |      |      |
|--------|------|----|-----|-----|--------|--------|--------|------|------|
| HETATM | 3416 | C2 | PRP | 179 | 44.702 | 3.264  | 35.236 | 1.00 | 0.00 |
| C      |      |    |     |     |        |        |        |      |      |
| HETATM | 3417 | H4 | PRP | 179 | 44.734 | 4.081  | 35.957 | 1.00 | 0.00 |
| H      |      |    |     |     |        |        |        |      |      |
| HETATM | 3418 | O2 | PRP | 179 | 45.403 | 3.659  | 34.032 | 1.00 | 0.00 |
| O      |      |    |     |     |        |        |        |      |      |
| HETATM | 3419 | H5 | PRP | 179 | 46.237 | 4.021  | 34.339 | 1.00 | 0.00 |
| H      |      |    |     |     |        |        |        |      |      |
| HETATM | 3420 | C3 | PRP | 179 | 45.568 | 2.107  | 35.716 | 1.00 | 0.00 |
| C      |      |    |     |     |        |        |        |      |      |
| HETATM | 3421 | H6 | PRP | 179 | 45.846 | 1.484  | 34.867 | 1.00 | 0.00 |
| H      |      |    |     |     |        |        |        |      |      |
| HETATM | 3422 | H7 | PRP | 179 | 46.489 | 2.567  | 36.073 | 1.00 | 0.00 |
| H      |      |    |     |     |        |        |        |      |      |
| HETATM | 3423 | H8 | PRP | 179 | 45.037 | 1.496  | 36.446 | 1.00 | 0.00 |
| H      |      |    |     |     |        |        |        |      |      |
| HETATM | 3424 | O1 | PRP | 180 | 40.865 | -2.540 | 37.306 | 1.00 | 0.00 |
| O      |      |    |     |     |        |        |        |      |      |
| HETATM | 3425 | H1 | PRP | 180 | 41.017 | -1.668 | 36.934 | 1.00 | 0.00 |
| H      |      |    |     |     |        |        |        |      |      |
| HETATM | 3426 | C1 | PRP | 180 | 41.142 | -2.524 | 38.705 | 1.00 | 0.00 |
| C      |      |    |     |     |        |        |        |      |      |
| HETATM | 3427 | H2 | PRP | 180 | 40.637 | -3.392 | 39.128 | 1.00 | 0.00 |
| H      |      |    |     |     |        |        |        |      |      |
| HETATM | 3428 | H3 | PRP | 180 | 42.229 | -2.592 | 38.741 | 1.00 | 0.00 |
| H      |      |    |     |     |        |        |        |      |      |
| HETATM | 3429 | C2 | PRP | 180 | 40.548 | -1.248 | 39.304 | 1.00 | 0.00 |
| C      |      |    |     |     |        |        |        |      |      |
| HETATM | 3430 | H4 | PRP | 180 | 39.463 | -1.205 | 39.208 | 1.00 | 0.00 |
| H      |      |    |     |     |        |        |        |      |      |
| HETATM | 3431 | O2 | PRP | 180 | 41.167 | -0.271 | 38.468 | 1.00 | 0.00 |
| O      |      |    |     |     |        |        |        |      |      |
| HETATM | 3432 | H5 | PRP | 180 | 40.507 | 0.410  | 38.318 | 1.00 | 0.00 |
| H      |      |    |     |     |        |        |        |      |      |
| HETATM | 3433 | C3 | PRP | 180 | 40.805 | -1.236 | 40.800 | 1.00 | 0.00 |
| C      |      |    |     |     |        |        |        |      |      |
| HETATM | 3434 | H6 | PRP | 180 | 40.149 | -1.885 | 41.379 | 1.00 | 0.00 |
| H      |      |    |     |     |        |        |        |      |      |
| HETATM | 3435 | H7 | PRP | 180 | 41.809 | -1.629 | 40.961 | 1.00 | 0.00 |
| H      |      |    |     |     |        |        |        |      |      |
| HETATM | 3436 | H8 | PRP | 180 | 40.829 | -0.197 | 41.128 | 1.00 | 0.00 |
| H      |      |    |     |     |        |        |        |      |      |
| HETATM | 3437 | O1 | PRP | 181 | 47.115 | -1.265 | 28.868 | 1.00 | 0.00 |
| O      |      |    |     |     |        |        |        |      |      |
| HETATM | 3438 | H1 | PRP | 181 | 46.385 | -1.750 | 28.474 | 1.00 | 0.00 |
| H      |      |    |     |     |        |        |        |      |      |
| HETATM | 3439 | C1 | PRP | 181 | 46.836 | -0.410 | 29.921 | 1.00 | 0.00 |
| C      |      |    |     |     |        |        |        |      |      |
| HETATM | 3440 | H2 | PRP | 181 | 47.593 | 0.374  | 29.937 | 1.00 | 0.00 |
| H      |      |    |     |     |        |        |        |      |      |
| HETATM | 3441 | H3 | PRP | 181 | 45.847 | 0.033  | 29.804 | 1.00 | 0.00 |
| H      |      |    |     |     |        |        |        |      |      |
| HETATM | 3442 | C2 | PRP | 181 | 46.989 | -1.064 | 31.328 | 1.00 | 0.00 |
| C      |      |    |     |     |        |        |        |      |      |
| HETATM | 3443 | H4 | PRP | 181 | 48.027 | -1.287 | 31.577 | 1.00 | 0.00 |
| H      |      |    |     |     |        |        |        |      |      |

|        |      |    |     |     |        |        |        |      |      |
|--------|------|----|-----|-----|--------|--------|--------|------|------|
| HETATM | 3444 | O2 | PRP | 181 | 46.358 | -2.275 | 31.247 | 1.00 | 0.00 |
| O      |      |    |     |     |        |        |        |      |      |
| HETATM | 3445 | H5 | PRP | 181 | 46.865 | -2.761 | 30.593 | 1.00 | 0.00 |
| H      |      |    |     |     |        |        |        |      |      |
| HETATM | 3446 | C3 | PRP | 181 | 46.366 | -0.106 | 32.374 | 1.00 | 0.00 |
| C      |      |    |     |     |        |        |        |      |      |
| HETATM | 3447 | H6 | PRP | 181 | 47.004 | 0.778  | 32.355 | 1.00 | 0.00 |
| H      |      |    |     |     |        |        |        |      |      |
| HETATM | 3448 | H7 | PRP | 181 | 45.281 | -0.074 | 32.283 | 1.00 | 0.00 |
| H      |      |    |     |     |        |        |        |      |      |
| HETATM | 3449 | H8 | PRP | 181 | 46.531 | -0.566 | 33.348 | 1.00 | 0.00 |
| H      |      |    |     |     |        |        |        |      |      |
| HETATM | 3450 | O1 | PRP | 182 | 47.758 | 4.035  | 32.205 | 1.00 | 0.00 |
| O      |      |    |     |     |        |        |        |      |      |
| HETATM | 3451 | H1 | PRP | 182 | 48.517 | 3.556  | 32.545 | 1.00 | 0.00 |
| H      |      |    |     |     |        |        |        |      |      |
| HETATM | 3452 | C1 | PRP | 182 | 47.344 | 3.412  | 31.002 | 1.00 | 0.00 |
| C      |      |    |     |     |        |        |        |      |      |
| HETATM | 3453 | H2 | PRP | 182 | 48.038 | 3.842  | 30.280 | 1.00 | 0.00 |
| H      |      |    |     |     |        |        |        |      |      |
| HETATM | 3454 | H3 | PRP | 182 | 47.305 | 2.323  | 31.038 | 1.00 | 0.00 |
| H      |      |    |     |     |        |        |        |      |      |
| HETATM | 3455 | C2 | PRP | 182 | 45.958 | 3.901  | 30.648 | 1.00 | 0.00 |
| C      |      |    |     |     |        |        |        |      |      |
| HETATM | 3456 | H4 | PRP | 182 | 45.930 | 4.979  | 30.811 | 1.00 | 0.00 |
| H      |      |    |     |     |        |        |        |      |      |
| HETATM | 3457 | O2 | PRP | 182 | 44.943 | 3.276  | 31.438 | 1.00 | 0.00 |
| O      |      |    |     |     |        |        |        |      |      |
| HETATM | 3458 | H5 | PRP | 182 | 45.080 | 3.487  | 32.364 | 1.00 | 0.00 |
| H      |      |    |     |     |        |        |        |      |      |
| HETATM | 3459 | C3 | PRP | 182 | 45.520 | 3.711  | 29.168 | 1.00 | 0.00 |
| C      |      |    |     |     |        |        |        |      |      |
| HETATM | 3460 | H6 | PRP | 182 | 46.092 | 4.281  | 28.436 | 1.00 | 0.00 |
| H      |      |    |     |     |        |        |        |      |      |
| HETATM | 3461 | H7 | PRP | 182 | 45.591 | 2.658  | 28.895 | 1.00 | 0.00 |
| H      |      |    |     |     |        |        |        |      |      |
| HETATM | 3462 | H8 | PRP | 182 | 44.454 | 3.925  | 29.090 | 1.00 | 0.00 |
| H      |      |    |     |     |        |        |        |      |      |
| HETATM | 3463 | O1 | PRP | 183 | 41.830 | 37.472 | 15.554 | 1.00 | 0.00 |
| O      |      |    |     |     |        |        |        |      |      |
| HETATM | 3464 | H1 | PRP | 183 | 40.904 | 37.368 | 15.323 | 1.00 | 0.00 |
| H      |      |    |     |     |        |        |        |      |      |
| HETATM | 3465 | C1 | PRP | 183 | 41.980 | 37.878 | 16.886 | 1.00 | 0.00 |
| C      |      |    |     |     |        |        |        |      |      |
| HETATM | 3466 | H2 | PRP | 183 | 42.983 | 38.279 | 17.032 | 1.00 | 0.00 |
| H      |      |    |     |     |        |        |        |      |      |
| HETATM | 3467 | H3 | PRP | 183 | 41.217 | 38.614 | 17.136 | 1.00 | 0.00 |
| H      |      |    |     |     |        |        |        |      |      |
| HETATM | 3468 | C2 | PRP | 183 | 41.879 | 36.718 | 17.897 | 1.00 | 0.00 |
| C      |      |    |     |     |        |        |        |      |      |
| HETATM | 3469 | H4 | PRP | 183 | 42.676 | 36.028 | 17.619 | 1.00 | 0.00 |
| H      |      |    |     |     |        |        |        |      |      |
| HETATM | 3470 | O2 | PRP | 183 | 40.628 | 36.160 | 17.763 | 1.00 | 0.00 |
| O      |      |    |     |     |        |        |        |      |      |
| HETATM | 3471 | H5 | PRP | 183 | 40.555 | 35.860 | 16.854 | 1.00 | 0.00 |
| H      |      |    |     |     |        |        |        |      |      |

|        |      |    |     |     |        |        |        |      |      |
|--------|------|----|-----|-----|--------|--------|--------|------|------|
| HETATM | 3472 | C3 | PRP | 183 | 42.082 | 37.095 | 19.396 | 1.00 | 0.00 |
| C      |      |    |     |     |        |        |        |      |      |
| HETATM | 3473 | H6 | PRP | 183 | 41.361 | 37.900 | 19.540 | 1.00 | 0.00 |
| H      |      |    |     |     |        |        |        |      |      |
| HETATM | 3474 | H7 | PRP | 183 | 41.960 | 36.213 | 20.025 | 1.00 | 0.00 |
| H      |      |    |     |     |        |        |        |      |      |
| HETATM | 3475 | H8 | PRP | 183 | 43.058 | 37.556 | 19.546 | 1.00 | 0.00 |
| H      |      |    |     |     |        |        |        |      |      |
| HETATM | 3476 | O1 | PRP | 184 | -7.007 | 25.518 | 53.177 | 1.00 | 0.00 |
| O      |      |    |     |     |        |        |        |      |      |
| HETATM | 3477 | H1 | PRP | 184 | -6.209 | 25.994 | 53.421 | 1.00 | 0.00 |
| H      |      |    |     |     |        |        |        |      |      |
| HETATM | 3478 | C1 | PRP | 184 | -7.164 | 24.710 | 54.299 | 1.00 | 0.00 |
| C      |      |    |     |     |        |        |        |      |      |
| HETATM | 3479 | H2 | PRP | 184 | -7.594 | 25.208 | 55.168 | 1.00 | 0.00 |
| H      |      |    |     |     |        |        |        |      |      |
| HETATM | 3480 | H3 | PRP | 184 | -7.960 | 23.973 | 54.188 | 1.00 | 0.00 |
| H      |      |    |     |     |        |        |        |      |      |
| HETATM | 3481 | C2 | PRP | 184 | -5.818 | 24.099 | 54.607 | 1.00 | 0.00 |
| C      |      |    |     |     |        |        |        |      |      |
| HETATM | 3482 | H4 | PRP | 184 | -5.809 | 23.605 | 55.579 | 1.00 | 0.00 |
| H      |      |    |     |     |        |        |        |      |      |
| HETATM | 3483 | O2 | PRP | 184 | -4.988 | 25.180 | 54.655 | 1.00 | 0.00 |
| O      |      |    |     |     |        |        |        |      |      |
| HETATM | 3484 | H5 | PRP | 184 | -4.297 | 24.945 | 55.279 | 1.00 | 0.00 |
| H      |      |    |     |     |        |        |        |      |      |
| HETATM | 3485 | C3 | PRP | 184 | -5.199 | 23.214 | 53.490 | 1.00 | 0.00 |
| C      |      |    |     |     |        |        |        |      |      |
| HETATM | 3486 | H6 | PRP | 184 | -5.725 | 22.263 | 53.585 | 1.00 | 0.00 |
| H      |      |    |     |     |        |        |        |      |      |
| HETATM | 3487 | H7 | PRP | 184 | -5.377 | 23.479 | 52.448 | 1.00 | 0.00 |
| H      |      |    |     |     |        |        |        |      |      |
| HETATM | 3488 | H8 | PRP | 184 | -4.122 | 23.115 | 53.629 | 1.00 | 0.00 |
| H      |      |    |     |     |        |        |        |      |      |
| HETATM | 3489 | O1 | PRP | 185 | -2.958 | 26.432 | 34.752 | 1.00 | 0.00 |
| O      |      |    |     |     |        |        |        |      |      |
| HETATM | 3490 | H1 | PRP | 185 | -2.329 | 25.815 | 35.133 | 1.00 | 0.00 |
| H      |      |    |     |     |        |        |        |      |      |
| HETATM | 3491 | C1 | PRP | 185 | -2.173 | 27.563 | 34.410 | 1.00 | 0.00 |
| C      |      |    |     |     |        |        |        |      |      |
| HETATM | 3492 | H2 | PRP | 185 | -2.402 | 27.731 | 33.358 | 1.00 | 0.00 |
| H      |      |    |     |     |        |        |        |      |      |
| HETATM | 3493 | H3 | PRP | 185 | -2.569 | 28.396 | 34.991 | 1.00 | 0.00 |
| H      |      |    |     |     |        |        |        |      |      |
| HETATM | 3494 | C2 | PRP | 185 | -0.649 | 27.376 | 34.556 | 1.00 | 0.00 |
| C      |      |    |     |     |        |        |        |      |      |
| HETATM | 3495 | H4 | PRP | 185 | -0.414 | 26.402 | 34.127 | 1.00 | 0.00 |
| H      |      |    |     |     |        |        |        |      |      |
| HETATM | 3496 | O2 | PRP | 185 | -0.304 | 27.337 | 35.912 | 1.00 | 0.00 |
| O      |      |    |     |     |        |        |        |      |      |
| HETATM | 3497 | H5 | PRP | 185 | -0.549 | 28.139 | 36.380 | 1.00 | 0.00 |
| H      |      |    |     |     |        |        |        |      |      |
| HETATM | 3498 | C3 | PRP | 185 | 0.067  | 28.497 | 33.800 | 1.00 | 0.00 |
| C      |      |    |     |     |        |        |        |      |      |
| HETATM | 3499 | H6 | PRP | 185 | -0.151 | 28.450 | 32.733 | 1.00 | 0.00 |
| H      |      |    |     |     |        |        |        |      |      |



|        |      |    |     |     |        |        |        |      |      |
|--------|------|----|-----|-----|--------|--------|--------|------|------|
| HETATM | 3500 | H7 | PRP | 185 | -0.155 | 29.488 | 34.194 | 1.00 | 0.00 |
| H      |      |    |     |     |        |        |        |      |      |
| HETATM | 3501 | H8 | PRP | 185 | 1.150  | 28.376 | 33.762 | 1.00 | 0.00 |
| H      |      |    |     |     |        |        |        |      |      |
| HETATM | 3502 | O1 | PRP | 186 | 3.399  | 12.023 | 41.078 | 1.00 | 0.00 |
| O      |      |    |     |     |        |        |        |      |      |
| HETATM | 3503 | H1 | PRP | 186 | 3.012  | 11.984 | 40.201 | 1.00 | 0.00 |
| H      |      |    |     |     |        |        |        |      |      |
| HETATM | 3504 | C1 | PRP | 186 | 2.457  | 12.301 | 42.147 | 1.00 | 0.00 |
| C      |      |    |     |     |        |        |        |      |      |
| HETATM | 3505 | H2 | PRP | 186 | 2.375  | 13.384 | 42.240 | 1.00 | 0.00 |
| H      |      |    |     |     |        |        |        |      |      |
| HETATM | 3506 | H3 | PRP | 186 | 1.467  | 11.928 | 41.884 | 1.00 | 0.00 |
| H      |      |    |     |     |        |        |        |      |      |
| HETATM | 3507 | C2 | PRP | 186 | 2.905  | 11.669 | 43.439 | 1.00 | 0.00 |
| C      |      |    |     |     |        |        |        |      |      |
| HETATM | 3508 | H4 | PRP | 186 | 3.901  | 12.029 | 43.697 | 1.00 | 0.00 |
| H      |      |    |     |     |        |        |        |      |      |
| HETATM | 3509 | O2 | PRP | 186 | 2.981  | 10.283 | 43.141 | 1.00 | 0.00 |
| O      |      |    |     |     |        |        |        |      |      |
| HETATM | 3510 | H5 | PRP | 186 | 3.083  | 10.174 | 42.193 | 1.00 | 0.00 |
| H      |      |    |     |     |        |        |        |      |      |
| HETATM | 3511 | C3 | PRP | 186 | 2.066  | 11.981 | 44.553 | 1.00 | 0.00 |
| C      |      |    |     |     |        |        |        |      |      |
| HETATM | 3512 | H6 | PRP | 186 | 1.041  | 11.944 | 44.182 | 1.00 | 0.00 |
| H      |      |    |     |     |        |        |        |      |      |
| HETATM | 3513 | H7 | PRP | 186 | 2.231  | 11.205 | 45.301 | 1.00 | 0.00 |
| H      |      |    |     |     |        |        |        |      |      |
| HETATM | 3514 | H8 | PRP | 186 | 2.162  | 13.018 | 44.873 | 1.00 | 0.00 |
| H      |      |    |     |     |        |        |        |      |      |
| HETATM | 3515 | O1 | PRP | 187 | 7.159  | 25.633 | 38.381 | 1.00 | 0.00 |
| O      |      |    |     |     |        |        |        |      |      |
| HETATM | 3516 | H1 | PRP | 187 | 6.853  | 26.112 | 37.607 | 1.00 | 0.00 |
| H      |      |    |     |     |        |        |        |      |      |
| HETATM | 3517 | C1 | PRP | 187 | 7.317  | 26.422 | 39.558 | 1.00 | 0.00 |
| C      |      |    |     |     |        |        |        |      |      |
| HETATM | 3518 | H2 | PRP | 187 | 7.484  | 27.455 | 39.253 | 1.00 | 0.00 |
| H      |      |    |     |     |        |        |        |      |      |
| HETATM | 3519 | H3 | PRP | 187 | 6.354  | 26.316 | 40.057 | 1.00 | 0.00 |
| H      |      |    |     |     |        |        |        |      |      |
| HETATM | 3520 | C2 | PRP | 187 | 8.525  | 25.991 | 40.367 | 1.00 | 0.00 |
| C      |      |    |     |     |        |        |        |      |      |
| HETATM | 3521 | H4 | PRP | 187 | 9.373  | 26.032 | 39.684 | 1.00 | 0.00 |
| H      |      |    |     |     |        |        |        |      |      |
| HETATM | 3522 | O2 | PRP | 187 | 8.171  | 24.676 | 40.846 | 1.00 | 0.00 |
| O      |      |    |     |     |        |        |        |      |      |
| HETATM | 3523 | H5 | PRP | 187 | 8.114  | 24.080 | 40.096 | 1.00 | 0.00 |
| H      |      |    |     |     |        |        |        |      |      |
| HETATM | 3524 | C3 | PRP | 187 | 8.711  | 26.970 | 41.502 | 1.00 | 0.00 |
| C      |      |    |     |     |        |        |        |      |      |
| HETATM | 3525 | H6 | PRP | 187 | 9.667  | 26.742 | 41.974 | 1.00 | 0.00 |
| H      |      |    |     |     |        |        |        |      |      |
| HETATM | 3526 | H7 | PRP | 187 | 8.576  | 27.980 | 41.116 | 1.00 | 0.00 |
| H      |      |    |     |     |        |        |        |      |      |
| HETATM | 3527 | H8 | PRP | 187 | 7.866  | 26.865 | 42.181 | 1.00 | 0.00 |
| H      |      |    |     |     |        |        |        |      |      |

|        |      |    |     |     |        |        |        |      |      |
|--------|------|----|-----|-----|--------|--------|--------|------|------|
| HETATM | 3528 | O1 | PRP | 188 | 8.843  | 26.255 | 48.670 | 1.00 | 0.00 |
| O      |      |    |     |     |        |        |        |      |      |
| HETATM | 3529 | H1 | PRP | 188 | 8.827  | 26.794 | 47.875 | 1.00 | 0.00 |
| H      |      |    |     |     |        |        |        |      |      |
| HETATM | 3530 | C1 | PRP | 188 | 8.450  | 24.932 | 48.294 | 1.00 | 0.00 |
| C      |      |    |     |     |        |        |        |      |      |
| HETATM | 3531 | H2 | PRP | 188 | 7.443  | 25.046 | 47.893 | 1.00 | 0.00 |
| H      |      |    |     |     |        |        |        |      |      |
| HETATM | 3532 | H3 | PRP | 188 | 9.226  | 24.478 | 47.679 | 1.00 | 0.00 |
| H      |      |    |     |     |        |        |        |      |      |
| HETATM | 3533 | C2 | PRP | 188 | 8.371  | 24.129 | 49.594 | 1.00 | 0.00 |
| C      |      |    |     |     |        |        |        |      |      |
| HETATM | 3534 | H4 | PRP | 188 | 7.730  | 24.694 | 50.270 | 1.00 | 0.00 |
| H      |      |    |     |     |        |        |        |      |      |
| HETATM | 3535 | O2 | PRP | 188 | 9.643  | 23.935 | 50.101 | 1.00 | 0.00 |
| O      |      |    |     |     |        |        |        |      |      |
| HETATM | 3536 | H5 | PRP | 188 | 10.101 | 24.755 | 49.905 | 1.00 | 0.00 |
| H      |      |    |     |     |        |        |        |      |      |
| HETATM | 3537 | C3 | PRP | 188 | 7.740  | 22.804 | 49.349 | 1.00 | 0.00 |
| C      |      |    |     |     |        |        |        |      |      |
| HETATM | 3538 | H6 | PRP | 188 | 7.832  | 22.151 | 50.217 | 1.00 | 0.00 |
| H      |      |    |     |     |        |        |        |      |      |
| HETATM | 3539 | H7 | PRP | 188 | 6.684  | 22.959 | 49.128 | 1.00 | 0.00 |
| H      |      |    |     |     |        |        |        |      |      |
| HETATM | 3540 | H8 | PRP | 188 | 8.186  | 22.429 | 48.428 | 1.00 | 0.00 |
| H      |      |    |     |     |        |        |        |      |      |
| HETATM | 3541 | O1 | PRP | 189 | -5.899 | 19.403 | 43.357 | 1.00 | 0.00 |
| O      |      |    |     |     |        |        |        |      |      |
| HETATM | 3542 | H1 | PRP | 189 | -6.684 | 19.577 | 43.881 | 1.00 | 0.00 |
| H      |      |    |     |     |        |        |        |      |      |
| HETATM | 3543 | C1 | PRP | 189 | -5.154 | 18.325 | 43.966 | 1.00 | 0.00 |
| C      |      |    |     |     |        |        |        |      |      |
| HETATM | 3544 | H2 | PRP | 189 | -4.227 | 18.151 | 43.419 | 1.00 | 0.00 |
| H      |      |    |     |     |        |        |        |      |      |
| HETATM | 3545 | H3 | PRP | 189 | -4.803 | 18.519 | 44.980 | 1.00 | 0.00 |
| H      |      |    |     |     |        |        |        |      |      |
| HETATM | 3546 | C2 | PRP | 189 | -5.897 | 16.951 | 43.818 | 1.00 | 0.00 |
| C      |      |    |     |     |        |        |        |      |      |
| HETATM | 3547 | H4 | PRP | 189 | -6.328 | 16.874 | 42.820 | 1.00 | 0.00 |
| H      |      |    |     |     |        |        |        |      |      |
| HETATM | 3548 | O2 | PRP | 189 | -6.920 | 16.801 | 44.834 | 1.00 | 0.00 |
| O      |      |    |     |     |        |        |        |      |      |
| HETATM | 3549 | H5 | PRP | 189 | -7.726 | 17.114 | 44.415 | 1.00 | 0.00 |
| H      |      |    |     |     |        |        |        |      |      |
| HETATM | 3550 | C3 | PRP | 189 | -4.975 | 15.724 | 43.991 | 1.00 | 0.00 |
| C      |      |    |     |     |        |        |        |      |      |
| HETATM | 3551 | H6 | PRP | 189 | -4.062 | 15.819 | 43.404 | 1.00 | 0.00 |
| H      |      |    |     |     |        |        |        |      |      |
| HETATM | 3552 | H7 | PRP | 189 | -4.685 | 15.545 | 45.027 | 1.00 | 0.00 |
| H      |      |    |     |     |        |        |        |      |      |
| HETATM | 3553 | H8 | PRP | 189 | -5.449 | 14.789 | 43.692 | 1.00 | 0.00 |
| H      |      |    |     |     |        |        |        |      |      |
| HETATM | 3554 | O1 | PRP | 190 | -2.262 | 23.701 | 38.822 | 1.00 | 0.00 |
| O      |      |    |     |     |        |        |        |      |      |
| HETATM | 3555 | H1 | PRP | 190 | -1.886 | 22.945 | 39.277 | 1.00 | 0.00 |
| H      |      |    |     |     |        |        |        |      |      |

|        |      |    |     |     |        |        |        |      |      |
|--------|------|----|-----|-----|--------|--------|--------|------|------|
| HETATM | 3556 | C1 | PRP | 190 | -2.633 | 24.646 | 39.879 | 1.00 | 0.00 |
| C      |      |    |     |     |        |        |        |      |      |
| HETATM | 3557 | H2 | PRP | 190 | -2.916 | 25.590 | 39.414 | 1.00 | 0.00 |
| H      |      |    |     |     |        |        |        |      |      |
| HETATM | 3558 | H3 | PRP | 190 | -3.512 | 24.368 | 40.460 | 1.00 | 0.00 |
| H      |      |    |     |     |        |        |        |      |      |
| HETATM | 3559 | C2 | PRP | 190 | -1.386 | 24.896 | 40.744 | 1.00 | 0.00 |
| C      |      |    |     |     |        |        |        |      |      |
| HETATM | 3560 | H4 | PRP | 190 | -0.628 | 24.859 | 39.962 | 1.00 | 0.00 |
| H      |      |    |     |     |        |        |        |      |      |
| HETATM | 3561 | O2 | PRP | 190 | -1.331 | 23.943 | 41.769 | 1.00 | 0.00 |
| O      |      |    |     |     |        |        |        |      |      |
| HETATM | 3562 | H5 | PRP | 190 | -1.111 | 23.078 | 41.415 | 1.00 | 0.00 |
| H      |      |    |     |     |        |        |        |      |      |
| HETATM | 3563 | C3 | PRP | 190 | -1.533 | 26.277 | 41.531 | 1.00 | 0.00 |
| C      |      |    |     |     |        |        |        |      |      |
| HETATM | 3564 | H6 | PRP | 190 | -0.599 | 26.559 | 42.017 | 1.00 | 0.00 |
| H      |      |    |     |     |        |        |        |      |      |
| HETATM | 3565 | H7 | PRP | 190 | -1.807 | 27.019 | 40.781 | 1.00 | 0.00 |
| H      |      |    |     |     |        |        |        |      |      |
| HETATM | 3566 | H8 | PRP | 190 | -2.293 | 26.179 | 42.307 | 1.00 | 0.00 |
| H      |      |    |     |     |        |        |        |      |      |
| HETATM | 3567 | O1 | PRP | 191 | -2.742 | 21.239 | 45.450 | 1.00 | 0.00 |
| O      |      |    |     |     |        |        |        |      |      |
| HETATM | 3568 | H1 | PRP | 191 | -3.329 | 21.998 | 45.482 | 1.00 | 0.00 |
| H      |      |    |     |     |        |        |        |      |      |
| HETATM | 3569 | C1 | PRP | 191 | -1.497 | 21.708 | 45.062 | 1.00 | 0.00 |
| C      |      |    |     |     |        |        |        |      |      |
| HETATM | 3570 | H2 | PRP | 191 | -0.679 | 21.205 | 45.577 | 1.00 | 0.00 |
| H      |      |    |     |     |        |        |        |      |      |
| HETATM | 3571 | H3 | PRP | 191 | -1.371 | 21.468 | 44.006 | 1.00 | 0.00 |
| H      |      |    |     |     |        |        |        |      |      |
| HETATM | 3572 | C2 | PRP | 191 | -1.541 | 23.224 | 45.293 | 1.00 | 0.00 |
| C      |      |    |     |     |        |        |        |      |      |
| HETATM | 3573 | H4 | PRP | 191 | -1.915 | 23.438 | 46.295 | 1.00 | 0.00 |
| H      |      |    |     |     |        |        |        |      |      |
| HETATM | 3574 | O2 | PRP | 191 | -2.249 | 23.971 | 44.265 | 1.00 | 0.00 |
| O      |      |    |     |     |        |        |        |      |      |
| HETATM | 3575 | H5 | PRP | 191 | -1.772 | 24.034 | 43.434 | 1.00 | 0.00 |
| H      |      |    |     |     |        |        |        |      |      |
| HETATM | 3576 | C3 | PRP | 191 | -0.118 | 23.816 | 45.405 | 1.00 | 0.00 |
| C      |      |    |     |     |        |        |        |      |      |
| HETATM | 3577 | H6 | PRP | 191 | -0.065 | 24.877 | 45.648 | 1.00 | 0.00 |
| H      |      |    |     |     |        |        |        |      |      |
| HETATM | 3578 | H7 | PRP | 191 | 0.437  | 23.226 | 46.135 | 1.00 | 0.00 |
| H      |      |    |     |     |        |        |        |      |      |
| HETATM | 3579 | H8 | PRP | 191 | 0.542  | 23.645 | 44.554 | 1.00 | 0.00 |
| H      |      |    |     |     |        |        |        |      |      |
| HETATM | 3580 | O1 | PRP | 192 | -8.354 | 18.953 | 47.720 | 1.00 | 0.00 |
| O      |      |    |     |     |        |        |        |      |      |
| HETATM | 3581 | H1 | PRP | 192 | -7.929 | 18.124 | 47.952 | 1.00 | 0.00 |
| H      |      |    |     |     |        |        |        |      |      |
| HETATM | 3582 | C1 | PRP | 192 | -7.844 | 19.953 | 48.614 | 1.00 | 0.00 |
| C      |      |    |     |     |        |        |        |      |      |
| HETATM | 3583 | H2 | PRP | 192 | -6.764 | 20.008 | 48.752 | 1.00 | 0.00 |
| H      |      |    |     |     |        |        |        |      |      |

|        |      |    |     |     |         |        |        |      |      |
|--------|------|----|-----|-----|---------|--------|--------|------|------|
| HETATM | 3584 | H3 | PRP | 192 | -8.030  | 20.994 | 48.351 | 1.00 | 0.00 |
| H      |      |    |     |     |         |        |        |      |      |
| HETATM | 3585 | C2 | PRP | 192 | -8.452  | 19.776 | 50.027 | 1.00 | 0.00 |
| C      |      |    |     |     |         |        |        |      |      |
| HETATM | 3586 | H4 | PRP | 192 | -8.036  | 20.522 | 50.704 | 1.00 | 0.00 |
| H      |      |    |     |     |         |        |        |      |      |
| HETATM | 3587 | O2 | PRP | 192 | -7.976  | 18.564 | 50.607 | 1.00 | 0.00 |
| O      |      |    |     |     |         |        |        |      |      |
| HETATM | 3588 | H5 | PRP | 192 | -7.950  | 17.848 | 49.968 | 1.00 | 0.00 |
| H      |      |    |     |     |         |        |        |      |      |
| HETATM | 3589 | C3 | PRP | 192 | -10.020 | 19.905 | 50.034 | 1.00 | 0.00 |
| C      |      |    |     |     |         |        |        |      |      |
| HETATM | 3590 | H6 | PRP | 192 | -10.454 | 19.551 | 50.970 | 1.00 | 0.00 |
| H      |      |    |     |     |         |        |        |      |      |
| HETATM | 3591 | H7 | PRP | 192 | -10.364 | 20.929 | 49.887 | 1.00 | 0.00 |
| H      |      |    |     |     |         |        |        |      |      |
| HETATM | 3592 | H8 | PRP | 192 | -10.383 | 19.212 | 49.274 | 1.00 | 0.00 |
| H      |      |    |     |     |         |        |        |      |      |
| HETATM | 3593 | O1 | PRP | 193 | -9.118  | 22.426 | 52.725 | 1.00 | 0.00 |
| O      |      |    |     |     |         |        |        |      |      |
| HETATM | 3594 | H1 | PRP | 193 | -9.511  | 23.004 | 53.384 | 1.00 | 0.00 |
| H      |      |    |     |     |         |        |        |      |      |
| HETATM | 3595 | C1 | PRP | 193 | -8.682  | 21.317 | 53.470 | 1.00 | 0.00 |
| C      |      |    |     |     |         |        |        |      |      |
| HETATM | 3596 | H2 | PRP | 193 | -8.195  | 20.563 | 52.852 | 1.00 | 0.00 |
| H      |      |    |     |     |         |        |        |      |      |
| HETATM | 3597 | H3 | PRP | 193 | -7.996  | 21.451 | 54.306 | 1.00 | 0.00 |
| H      |      |    |     |     |         |        |        |      |      |
| HETATM | 3598 | C2 | PRP | 193 | -9.974  | 20.620 | 53.979 | 1.00 | 0.00 |
| C      |      |    |     |     |         |        |        |      |      |
| HETATM | 3599 | H4 | PRP | 193 | -10.595 | 20.576 | 53.084 | 1.00 | 0.00 |
| H      |      |    |     |     |         |        |        |      |      |
| HETATM | 3600 | O2 | PRP | 193 | -10.663 | 21.265 | 55.050 | 1.00 | 0.00 |
| O      |      |    |     |     |         |        |        |      |      |
| HETATM | 3601 | H5 | PRP | 193 | -10.744 | 22.212 | 54.916 | 1.00 | 0.00 |
| H      |      |    |     |     |         |        |        |      |      |
| HETATM | 3602 | C3 | PRP | 193 | -9.700  | 19.161 | 54.262 | 1.00 | 0.00 |
| C      |      |    |     |     |         |        |        |      |      |
| HETATM | 3603 | H6 | PRP | 193 | -9.022  | 19.085 | 55.112 | 1.00 | 0.00 |
| H      |      |    |     |     |         |        |        |      |      |
| HETATM | 3604 | H7 | PRP | 193 | -10.643 | 18.675 | 54.515 | 1.00 | 0.00 |
| H      |      |    |     |     |         |        |        |      |      |
| HETATM | 3605 | H8 | PRP | 193 | -9.229  | 18.751 | 53.368 | 1.00 | 0.00 |
| H      |      |    |     |     |         |        |        |      |      |
| HETATM | 3606 | O1 | PRP | 194 | -2.786  | -1.839 | 41.720 | 1.00 | 0.00 |
| O      |      |    |     |     |         |        |        |      |      |
| HETATM | 3607 | H1 | PRP | 194 | -1.951  | -1.437 | 41.974 | 1.00 | 0.00 |
| H      |      |    |     |     |         |        |        |      |      |
| HETATM | 3608 | C1 | PRP | 194 | -3.726  | -0.854 | 41.879 | 1.00 | 0.00 |
| C      |      |    |     |     |         |        |        |      |      |
| HETATM | 3609 | H2 | PRP | 194 | -4.666  | -1.198 | 41.446 | 1.00 | 0.00 |
| H      |      |    |     |     |         |        |        |      |      |
| HETATM | 3610 | H3 | PRP | 194 | -3.828  | -0.631 | 42.941 | 1.00 | 0.00 |
| H      |      |    |     |     |         |        |        |      |      |
| HETATM | 3611 | C2 | PRP | 194 | -3.310  | 0.501  | 41.191 | 1.00 | 0.00 |
| C      |      |    |     |     |         |        |        |      |      |

|        |      |    |     |     |         |       |        |      |      |
|--------|------|----|-----|-----|---------|-------|--------|------|------|
| HETATM | 3612 | H4 | PRP | 194 | -2.688  | 0.373 | 40.305 | 1.00 | 0.00 |
| H      |      |    |     |     |         |       |        |      |      |
| HETATM | 3613 | O2 | PRP | 194 | -2.546  | 1.283 | 42.108 | 1.00 | 0.00 |
| O      |      |    |     |     |         |       |        |      |      |
| HETATM | 3614 | H5 | PRP | 194 | -1.605  | 1.274 | 41.918 | 1.00 | 0.00 |
| H      |      |    |     |     |         |       |        |      |      |
| HETATM | 3615 | C3 | PRP | 194 | -4.523  | 1.270 | 40.877 | 1.00 | 0.00 |
| C      |      |    |     |     |         |       |        |      |      |
| HETATM | 3616 | H6 | PRP | 194 | -4.299  | 2.337 | 40.859 | 1.00 | 0.00 |
| H      |      |    |     |     |         |       |        |      |      |
| HETATM | 3617 | H7 | PRP | 194 | -4.812  | 0.921 | 39.886 | 1.00 | 0.00 |
| H      |      |    |     |     |         |       |        |      |      |
| HETATM | 3618 | H8 | PRP | 194 | -5.386  | 1.116 | 41.525 | 1.00 | 0.00 |
| H      |      |    |     |     |         |       |        |      |      |
| HETATM | 3619 | O1 | PRP | 195 | -7.145  | 6.217 | 39.425 | 1.00 | 0.00 |
| O      |      |    |     |     |         |       |        |      |      |
| HETATM | 3620 | H1 | PRP | 195 | -6.840  | 6.474 | 40.299 | 1.00 | 0.00 |
| H      |      |    |     |     |         |       |        |      |      |
| HETATM | 3621 | C1 | PRP | 195 | -8.266  | 5.399 | 39.671 | 1.00 | 0.00 |
| C      |      |    |     |     |         |       |        |      |      |
| HETATM | 3622 | H2 | PRP | 195 | -8.580  | 5.426 | 40.714 | 1.00 | 0.00 |
| H      |      |    |     |     |         |       |        |      |      |
| HETATM | 3623 | H3 | PRP | 195 | -9.089  | 5.728 | 39.037 | 1.00 | 0.00 |
| H      |      |    |     |     |         |       |        |      |      |
| HETATM | 3624 | C2 | PRP | 195 | -7.981  | 3.907 | 39.387 | 1.00 | 0.00 |
| C      |      |    |     |     |         |       |        |      |      |
| HETATM | 3625 | H4 | PRP | 195 | -7.329  | 3.550 | 40.183 | 1.00 | 0.00 |
| H      |      |    |     |     |         |       |        |      |      |
| HETATM | 3626 | O2 | PRP | 195 | -7.404  | 3.883 | 38.060 | 1.00 | 0.00 |
| O      |      |    |     |     |         |       |        |      |      |
| HETATM | 3627 | H5 | PRP | 195 | -6.477  | 4.103 | 38.181 | 1.00 | 0.00 |
| H      |      |    |     |     |         |       |        |      |      |
| HETATM | 3628 | C3 | PRP | 195 | -9.375  | 3.188 | 39.435 | 1.00 | 0.00 |
| C      |      |    |     |     |         |       |        |      |      |
| HETATM | 3629 | H6 | PRP | 195 | -9.642  | 3.059 | 40.484 | 1.00 | 0.00 |
| H      |      |    |     |     |         |       |        |      |      |
| HETATM | 3630 | H7 | PRP | 195 | -10.132 | 3.656 | 38.806 | 1.00 | 0.00 |
| H      |      |    |     |     |         |       |        |      |      |
| HETATM | 3631 | H8 | PRP | 195 | -9.220  | 2.161 | 39.103 | 1.00 | 0.00 |
| H      |      |    |     |     |         |       |        |      |      |
| HETATM | 3632 | O1 | PRP | 196 | 0.435   | 6.445 | 37.958 | 1.00 | 0.00 |
| O      |      |    |     |     |         |       |        |      |      |
| HETATM | 3633 | H1 | PRP | 196 | -0.514  | 6.330 | 37.872 | 1.00 | 0.00 |
| H      |      |    |     |     |         |       |        |      |      |
| HETATM | 3634 | C1 | PRP | 196 | 0.678   | 5.897 | 39.245 | 1.00 | 0.00 |
| C      |      |    |     |     |         |       |        |      |      |
| HETATM | 3635 | H2 | PRP | 196 | 0.357   | 6.570 | 40.041 | 1.00 | 0.00 |
| H      |      |    |     |     |         |       |        |      |      |
| HETATM | 3636 | H3 | PRP | 196 | 0.045   | 5.011 | 39.194 | 1.00 | 0.00 |
| H      |      |    |     |     |         |       |        |      |      |
| HETATM | 3637 | C2 | PRP | 196 | 2.120   | 5.540 | 39.571 | 1.00 | 0.00 |
| C      |      |    |     |     |         |       |        |      |      |
| HETATM | 3638 | H4 | PRP | 196 | 2.209   | 5.520 | 40.657 | 1.00 | 0.00 |
| H      |      |    |     |     |         |       |        |      |      |
| HETATM | 3639 | O2 | PRP | 196 | 2.782   | 6.555 | 38.883 | 1.00 | 0.00 |
| O      |      |    |     |     |         |       |        |      |      |

|        |      |    |     |     |         |        |        |      |      |
|--------|------|----|-----|-----|---------|--------|--------|------|------|
| HETATM | 3640 | H5 | PRP | 196 | 2.125   | 6.686  | 38.196 | 1.00 | 0.00 |
| H      |      |    |     |     |         |        |        |      |      |
| HETATM | 3641 | C3 | PRP | 196 | 2.621   | 4.230  | 38.962 | 1.00 | 0.00 |
| C      |      |    |     |     |         |        |        |      |      |
| HETATM | 3642 | H6 | PRP | 196 | 2.047   | 3.431  | 39.432 | 1.00 | 0.00 |
| H      |      |    |     |     |         |        |        |      |      |
| HETATM | 3643 | H7 | PRP | 196 | 2.401   | 4.197  | 37.895 | 1.00 | 0.00 |
| H      |      |    |     |     |         |        |        |      |      |
| HETATM | 3644 | H8 | PRP | 196 | 3.669   | 4.026  | 39.179 | 1.00 | 0.00 |
| H      |      |    |     |     |         |        |        |      |      |
| HETATM | 3645 | O1 | PRP | 197 | -8.005  | 39.206 | 42.901 | 1.00 | 0.00 |
| O      |      |    |     |     |         |        |        |      |      |
| HETATM | 3646 | H1 | PRP | 197 | -8.181  | 39.937 | 43.498 | 1.00 | 0.00 |
| H      |      |    |     |     |         |        |        |      |      |
| HETATM | 3647 | C1 | PRP | 197 | -8.160  | 38.032 | 43.629 | 1.00 | 0.00 |
| C      |      |    |     |     |         |        |        |      |      |
| HETATM | 3648 | H2 | PRP | 197 | -7.893  | 37.136 | 43.068 | 1.00 | 0.00 |
| H      |      |    |     |     |         |        |        |      |      |
| HETATM | 3649 | H3 | PRP | 197 | -7.547  | 38.098 | 44.527 | 1.00 | 0.00 |
| H      |      |    |     |     |         |        |        |      |      |
| HETATM | 3650 | C2 | PRP | 197 | -9.610  | 37.978 | 43.983 | 1.00 | 0.00 |
| C      |      |    |     |     |         |        |        |      |      |
| HETATM | 3651 | H4 | PRP | 197 | -10.210 | 38.176 | 43.095 | 1.00 | 0.00 |
| H      |      |    |     |     |         |        |        |      |      |
| HETATM | 3652 | O2 | PRP | 197 | -9.789  | 38.912 | 45.072 | 1.00 | 0.00 |
| O      |      |    |     |     |         |        |        |      |      |
| HETATM | 3653 | H5 | PRP | 197 | -9.926  | 39.743 | 44.612 | 1.00 | 0.00 |
| H      |      |    |     |     |         |        |        |      |      |
| HETATM | 3654 | C3 | PRP | 197 | -10.028 | 36.690 | 44.617 | 1.00 | 0.00 |
| C      |      |    |     |     |         |        |        |      |      |
| HETATM | 3655 | H6 | PRP | 197 | -9.303  | 36.431 | 45.389 | 1.00 | 0.00 |
| H      |      |    |     |     |         |        |        |      |      |
| HETATM | 3656 | H7 | PRP | 197 | -11.024 | 36.639 | 45.056 | 1.00 | 0.00 |
| H      |      |    |     |     |         |        |        |      |      |
| HETATM | 3657 | H8 | PRP | 197 | -10.033 | 35.910 | 43.855 | 1.00 | 0.00 |
| H      |      |    |     |     |         |        |        |      |      |
| HETATM | 3658 | O1 | PRP | 198 | -0.464  | 24.698 | 31.337 | 1.00 | 0.00 |
| O      |      |    |     |     |         |        |        |      |      |
| HETATM | 3659 | H1 | PRP | 198 | -0.964  | 25.509 | 31.224 | 1.00 | 0.00 |
| H      |      |    |     |     |         |        |        |      |      |
| HETATM | 3660 | C1 | PRP | 198 | 0.589   | 24.832 | 30.458 | 1.00 | 0.00 |
| C      |      |    |     |     |         |        |        |      |      |
| HETATM | 3661 | H2 | PRP | 198 | 1.167   | 25.714 | 30.733 | 1.00 | 0.00 |
| H      |      |    |     |     |         |        |        |      |      |
| HETATM | 3662 | H3 | PRP | 198 | 1.258   | 23.982 | 30.592 | 1.00 | 0.00 |
| H      |      |    |     |     |         |        |        |      |      |
| HETATM | 3663 | C2 | PRP | 198 | 0.165   | 24.944 | 28.954 | 1.00 | 0.00 |
| C      |      |    |     |     |         |        |        |      |      |
| HETATM | 3664 | H4 | PRP | 198 | 1.059   | 24.965 | 28.331 | 1.00 | 0.00 |
| H      |      |    |     |     |         |        |        |      |      |
| HETATM | 3665 | O2 | PRP | 198 | -0.495  | 26.233 | 28.761 | 1.00 | 0.00 |
| O      |      |    |     |     |         |        |        |      |      |
| HETATM | 3666 | H5 | PRP | 198 | -0.069  | 26.651 | 28.010 | 1.00 | 0.00 |
| H      |      |    |     |     |         |        |        |      |      |
| HETATM | 3667 | C3 | PRP | 198 | -0.840  | 23.857 | 28.537 | 1.00 | 0.00 |
| C      |      |    |     |     |         |        |        |      |      |

|        |      |    |     |     |         |        |        |      |      |
|--------|------|----|-----|-----|---------|--------|--------|------|------|
| HETATM | 3668 | H6 | PRP | 198 | -0.477  | 22.954 | 29.028 | 1.00 | 0.00 |
| H      |      |    |     |     |         |        |        |      |      |
| HETATM | 3669 | H7 | PRP | 198 | -1.839  | 24.108 | 28.895 | 1.00 | 0.00 |
| H      |      |    |     |     |         |        |        |      |      |
| HETATM | 3670 | H8 | PRP | 198 | -0.812  | 23.775 | 27.450 | 1.00 | 0.00 |
| H      |      |    |     |     |         |        |        |      |      |
| HETATM | 3671 | O1 | PRP | 199 | -9.559  | 17.371 | 44.008 | 1.00 | 0.00 |
| O      |      |    |     |     |         |        |        |      |      |
| HETATM | 3672 | H1 | PRP | 199 | -9.589  | 17.622 | 43.082 | 1.00 | 0.00 |
| H      |      |    |     |     |         |        |        |      |      |
| HETATM | 3673 | C1 | PRP | 199 | -10.090 | 18.358 | 44.843 | 1.00 | 0.00 |
| C      |      |    |     |     |         |        |        |      |      |
| HETATM | 3674 | H2 | PRP | 199 | -11.138 | 18.543 | 44.609 | 1.00 | 0.00 |
| H      |      |    |     |     |         |        |        |      |      |
| HETATM | 3675 | H3 | PRP | 199 | -9.913  | 18.107 | 45.888 | 1.00 | 0.00 |
| H      |      |    |     |     |         |        |        |      |      |
| HETATM | 3676 | C2 | PRP | 199 | -9.290  | 19.637 | 44.497 | 1.00 | 0.00 |
| C      |      |    |     |     |         |        |        |      |      |
| HETATM | 3677 | H4 | PRP | 199 | -9.368  | 19.940 | 43.453 | 1.00 | 0.00 |
| H      |      |    |     |     |         |        |        |      |      |
| HETATM | 3678 | O2 | PRP | 199 | -7.956  | 19.442 | 44.914 | 1.00 | 0.00 |
| O      |      |    |     |     |         |        |        |      |      |
| HETATM | 3679 | H5 | PRP | 199 | -7.935  | 19.083 | 45.804 | 1.00 | 0.00 |
| H      |      |    |     |     |         |        |        |      |      |
| HETATM | 3680 | C3 | PRP | 199 | -9.794  | 20.868 | 45.287 | 1.00 | 0.00 |
| C      |      |    |     |     |         |        |        |      |      |
| HETATM | 3681 | H6 | PRP | 199 | -10.626 | 20.562 | 45.921 | 1.00 | 0.00 |
| H      |      |    |     |     |         |        |        |      |      |
| HETATM | 3682 | H7 | PRP | 199 | -8.959  | 21.126 | 45.939 | 1.00 | 0.00 |
| H      |      |    |     |     |         |        |        |      |      |
| HETATM | 3683 | H8 | PRP | 199 | -10.083 | 21.681 | 44.621 | 1.00 | 0.00 |
| H      |      |    |     |     |         |        |        |      |      |
| HETATM | 3684 | O1 | PRP | 200 | -1.603  | 24.450 | 36.243 | 1.00 | 0.00 |
| O      |      |    |     |     |         |        |        |      |      |
| HETATM | 3685 | H1 | PRP | 200 | -1.561  | 24.517 | 37.199 | 1.00 | 0.00 |
| H      |      |    |     |     |         |        |        |      |      |
| HETATM | 3686 | C1 | PRP | 200 | -0.359  | 24.023 | 35.786 | 1.00 | 0.00 |
| C      |      |    |     |     |         |        |        |      |      |
| HETATM | 3687 | H2 | PRP | 200 | -0.347  | 23.972 | 34.697 | 1.00 | 0.00 |
| H      |      |    |     |     |         |        |        |      |      |
| HETATM | 3688 | H3 | PRP | 200 | 0.368   | 24.797 | 36.031 | 1.00 | 0.00 |
| H      |      |    |     |     |         |        |        |      |      |
| HETATM | 3689 | C2 | PRP | 200 | 0.037   | 22.622 | 36.300 | 1.00 | 0.00 |
| C      |      |    |     |     |         |        |        |      |      |
| HETATM | 3690 | H4 | PRP | 200 | 0.690   | 22.079 | 35.617 | 1.00 | 0.00 |
| H      |      |    |     |     |         |        |        |      |      |
| HETATM | 3691 | O2 | PRP | 200 | -1.056  | 21.768 | 36.364 | 1.00 | 0.00 |
| O      |      |    |     |     |         |        |        |      |      |
| HETATM | 3692 | H5 | PRP | 200 | -1.825  | 22.177 | 36.769 | 1.00 | 0.00 |
| H      |      |    |     |     |         |        |        |      |      |
| HETATM | 3693 | C3 | PRP | 200 | 0.770   | 22.725 | 37.606 | 1.00 | 0.00 |
| C      |      |    |     |     |         |        |        |      |      |
| HETATM | 3694 | H6 | PRP | 200 | 0.274   | 23.425 | 38.279 | 1.00 | 0.00 |
| H      |      |    |     |     |         |        |        |      |      |
| HETATM | 3695 | H7 | PRP | 200 | 0.822   | 21.748 | 38.087 | 1.00 | 0.00 |
| H      |      |    |     |     |         |        |        |      |      |

|        |      |    |     |     |        |        |        |      |      |
|--------|------|----|-----|-----|--------|--------|--------|------|------|
| HETATM | 3696 | H8 | PRP | 200 | 1.785  | 23.088 | 37.445 | 1.00 | 0.00 |
| H      |      |    |     |     |        |        |        |      |      |
| HETATM | 3697 | O1 | PRP | 201 | 3.678  | 20.288 | 43.666 | 1.00 | 0.00 |
| O      |      |    |     |     |        |        |        |      |      |
| HETATM | 3698 | H1 | PRP | 201 | 3.624  | 19.905 | 42.788 | 1.00 | 0.00 |
| H      |      |    |     |     |        |        |        |      |      |
| HETATM | 3699 | C1 | PRP | 201 | 2.353  | 20.216 | 44.112 | 1.00 | 0.00 |
| C      |      |    |     |     |        |        |        |      |      |
| HETATM | 3700 | H2 | PRP | 201 | 2.318  | 19.417 | 44.852 | 1.00 | 0.00 |
| H      |      |    |     |     |        |        |        |      |      |
| HETATM | 3701 | H3 | PRP | 201 | 2.021  | 21.157 | 44.552 | 1.00 | 0.00 |
| H      |      |    |     |     |        |        |        |      |      |
| HETATM | 3702 | C2 | PRP | 201 | 1.440  | 19.695 | 43.062 | 1.00 | 0.00 |
| C      |      |    |     |     |        |        |        |      |      |
| HETATM | 3703 | H4 | PRP | 201 | 1.992  | 19.203 | 42.261 | 1.00 | 0.00 |
| H      |      |    |     |     |        |        |        |      |      |
| HETATM | 3704 | O2 | PRP | 201 | 0.912  | 20.816 | 42.481 | 1.00 | 0.00 |
| O      |      |    |     |     |        |        |        |      |      |
| HETATM | 3705 | H5 | PRP | 201 | 1.658  | 21.414 | 42.394 | 1.00 | 0.00 |
| H      |      |    |     |     |        |        |        |      |      |
| HETATM | 3706 | C3 | PRP | 201 | 0.437  | 18.780 | 43.713 | 1.00 | 0.00 |
| C      |      |    |     |     |        |        |        |      |      |
| HETATM | 3707 | H6 | PRP | 201 | 1.021  | 17.860 | 43.758 | 1.00 | 0.00 |
| H      |      |    |     |     |        |        |        |      |      |
| HETATM | 3708 | H7 | PRP | 201 | 0.095  | 19.168 | 44.672 | 1.00 | 0.00 |
| H      |      |    |     |     |        |        |        |      |      |
| HETATM | 3709 | H8 | PRP | 201 | -0.399 | 18.550 | 43.052 | 1.00 | 0.00 |
| H      |      |    |     |     |        |        |        |      |      |
| HETATM | 3710 | O1 | PRP | 202 | 3.527  | 50.462 | 50.340 | 1.00 | 0.00 |
| O      |      |    |     |     |        |        |        |      |      |
| HETATM | 3711 | H1 | PRP | 202 | 2.685  | 50.522 | 50.798 | 1.00 | 0.00 |
| H      |      |    |     |     |        |        |        |      |      |
| HETATM | 3712 | C1 | PRP | 202 | 3.637  | 51.706 | 49.714 | 1.00 | 0.00 |
| C      |      |    |     |     |        |        |        |      |      |
| HETATM | 3713 | H2 | PRP | 202 | 4.291  | 51.650 | 48.844 | 1.00 | 0.00 |
| H      |      |    |     |     |        |        |        |      |      |
| HETATM | 3714 | H3 | PRP | 202 | 2.637  | 51.978 | 49.377 | 1.00 | 0.00 |
| H      |      |    |     |     |        |        |        |      |      |
| HETATM | 3715 | C2 | PRP | 202 | 4.106  | 52.889 | 50.616 | 1.00 | 0.00 |
| C      |      |    |     |     |        |        |        |      |      |
| HETATM | 3716 | H4 | PRP | 202 | 4.706  | 53.599 | 50.047 | 1.00 | 0.00 |
| H      |      |    |     |     |        |        |        |      |      |
| HETATM | 3717 | O2 | PRP | 202 | 4.892  | 52.428 | 51.734 | 1.00 | 0.00 |
| O      |      |    |     |     |        |        |        |      |      |
| HETATM | 3718 | H5 | PRP | 202 | 5.265  | 51.564 | 51.550 | 1.00 | 0.00 |
| H      |      |    |     |     |        |        |        |      |      |
| HETATM | 3719 | C3 | PRP | 202 | 2.906  | 53.691 | 51.212 | 1.00 | 0.00 |
| C      |      |    |     |     |        |        |        |      |      |
| HETATM | 3720 | H6 | PRP | 202 | 3.371  | 54.477 | 51.808 | 1.00 | 0.00 |
| H      |      |    |     |     |        |        |        |      |      |
| HETATM | 3721 | H7 | PRP | 202 | 2.266  | 54.012 | 50.391 | 1.00 | 0.00 |
| H      |      |    |     |     |        |        |        |      |      |
| HETATM | 3722 | H8 | PRP | 202 | 2.395  | 52.949 | 51.825 | 1.00 | 0.00 |
| H      |      |    |     |     |        |        |        |      |      |
| HETATM | 3723 | O1 | PRP | 203 | 0.462  | 37.039 | 54.761 | 1.00 | 0.00 |
| O      |      |    |     |     |        |        |        |      |      |



|        |      |    |     |     |        |        |        |      |      |
|--------|------|----|-----|-----|--------|--------|--------|------|------|
| HETATM | 3724 | H1 | PRP | 203 | 0.417  | 37.145 | 55.714 | 1.00 | 0.00 |
| H      |      |    |     |     |        |        |        |      |      |
| HETATM | 3725 | C1 | PRP | 203 | 1.229  | 35.913 | 54.466 | 1.00 | 0.00 |
| C      |      |    |     |     |        |        |        |      |      |
| HETATM | 3726 | H2 | PRP | 203 | 0.647  | 35.034 | 54.743 | 1.00 | 0.00 |
| H      |      |    |     |     |        |        |        |      |      |
| HETATM | 3727 | H3 | PRP | 203 | 1.474  | 35.870 | 53.405 | 1.00 | 0.00 |
| H      |      |    |     |     |        |        |        |      |      |
| HETATM | 3728 | C2 | PRP | 203 | 2.533  | 35.694 | 55.273 | 1.00 | 0.00 |
| C      |      |    |     |     |        |        |        |      |      |
| HETATM | 3729 | H4 | PRP | 203 | 3.027  | 34.806 | 54.881 | 1.00 | 0.00 |
| H      |      |    |     |     |        |        |        |      |      |
| HETATM | 3730 | O2 | PRP | 203 | 2.222  | 35.370 | 56.620 | 1.00 | 0.00 |
| O      |      |    |     |     |        |        |        |      |      |
| HETATM | 3731 | H5 | PRP | 203 | 1.892  | 36.196 | 56.982 | 1.00 | 0.00 |
| H      |      |    |     |     |        |        |        |      |      |
| HETATM | 3732 | C3 | PRP | 203 | 3.495  | 36.839 | 55.303 | 1.00 | 0.00 |
| C      |      |    |     |     |        |        |        |      |      |
| HETATM | 3733 | H6 | PRP | 203 | 4.224  | 36.972 | 56.102 | 1.00 | 0.00 |
| H      |      |    |     |     |        |        |        |      |      |
| HETATM | 3734 | H7 | PRP | 203 | 4.084  | 36.799 | 54.386 | 1.00 | 0.00 |
| H      |      |    |     |     |        |        |        |      |      |
| HETATM | 3735 | H8 | PRP | 203 | 2.943  | 37.770 | 55.174 | 1.00 | 0.00 |
| H      |      |    |     |     |        |        |        |      |      |
| HETATM | 3736 | O1 | PRP | 204 | 8.166  | 48.868 | 48.065 | 1.00 | 0.00 |
| O      |      |    |     |     |        |        |        |      |      |
| HETATM | 3737 | H1 | PRP | 204 | 7.546  | 49.494 | 47.682 | 1.00 | 0.00 |
| H      |      |    |     |     |        |        |        |      |      |
| HETATM | 3738 | C1 | PRP | 204 | 7.830  | 47.545 | 47.660 | 1.00 | 0.00 |
| C      |      |    |     |     |        |        |        |      |      |
| HETATM | 3739 | H2 | PRP | 204 | 8.541  | 47.171 | 46.923 | 1.00 | 0.00 |
| H      |      |    |     |     |        |        |        |      |      |
| HETATM | 3740 | H3 | PRP | 204 | 8.055  | 46.937 | 48.537 | 1.00 | 0.00 |
| H      |      |    |     |     |        |        |        |      |      |
| HETATM | 3741 | C2 | PRP | 204 | 6.425  | 47.556 | 47.143 | 1.00 | 0.00 |
| C      |      |    |     |     |        |        |        |      |      |
| HETATM | 3742 | H4 | PRP | 204 | 6.142  | 46.577 | 46.755 | 1.00 | 0.00 |
| H      |      |    |     |     |        |        |        |      |      |
| HETATM | 3743 | O2 | PRP | 204 | 6.514  | 48.544 | 46.088 | 1.00 | 0.00 |
| O      |      |    |     |     |        |        |        |      |      |
| HETATM | 3744 | H5 | PRP | 204 | 7.331  | 48.480 | 45.589 | 1.00 | 0.00 |
| H      |      |    |     |     |        |        |        |      |      |
| HETATM | 3745 | C3 | PRP | 204 | 5.333  | 48.056 | 48.067 | 1.00 | 0.00 |
| C      |      |    |     |     |        |        |        |      |      |
| HETATM | 3746 | H6 | PRP | 204 | 4.356  | 47.834 | 47.638 | 1.00 | 0.00 |
| H      |      |    |     |     |        |        |        |      |      |
| HETATM | 3747 | H7 | PRP | 204 | 5.242  | 47.502 | 49.001 | 1.00 | 0.00 |
| H      |      |    |     |     |        |        |        |      |      |
| HETATM | 3748 | H8 | PRP | 204 | 5.509  | 49.113 | 48.271 | 1.00 | 0.00 |
| H      |      |    |     |     |        |        |        |      |      |
| HETATM | 3749 | O1 | PRP | 205 | -0.740 | 48.681 | 51.159 | 1.00 | 0.00 |
| O      |      |    |     |     |        |        |        |      |      |
| HETATM | 3750 | H1 | PRP | 205 | -0.478 | 49.203 | 50.397 | 1.00 | 0.00 |
| H      |      |    |     |     |        |        |        |      |      |
| HETATM | 3751 | C1 | PRP | 205 | 0.447  | 48.591 | 51.903 | 1.00 | 0.00 |
| C      |      |    |     |     |        |        |        |      |      |

|        |      |    |     |     |        |        |        |      |      |
|--------|------|----|-----|-----|--------|--------|--------|------|------|
| HETATM | 3752 | H2 | PRP | 205 | 0.332  | 47.819 | 52.665 | 1.00 | 0.00 |
| H      |      |    |     |     |        |        |        |      |      |
| HETATM | 3753 | H3 | PRP | 205 | 1.328  | 48.400 | 51.290 | 1.00 | 0.00 |
| H      |      |    |     |     |        |        |        |      |      |
| HETATM | 3754 | C2 | PRP | 205 | 0.650  | 49.904 | 52.584 | 1.00 | 0.00 |
| C      |      |    |     |     |        |        |        |      |      |
| HETATM | 3755 | H4 | PRP | 205 | -0.301 | 50.188 | 53.035 | 1.00 | 0.00 |
| H      |      |    |     |     |        |        |        |      |      |
| HETATM | 3756 | O2 | PRP | 205 | 1.104  | 50.843 | 51.581 | 1.00 | 0.00 |
| O      |      |    |     |     |        |        |        |      |      |
| HETATM | 3757 | H5 | PRP | 205 | 0.645  | 51.636 | 51.866 | 1.00 | 0.00 |
| H      |      |    |     |     |        |        |        |      |      |
| HETATM | 3758 | C3 | PRP | 205 | 1.828  | 49.855 | 53.596 | 1.00 | 0.00 |
| C      |      |    |     |     |        |        |        |      |      |
| HETATM | 3759 | H6 | PRP | 205 | 1.528  | 49.223 | 54.432 | 1.00 | 0.00 |
| H      |      |    |     |     |        |        |        |      |      |
| HETATM | 3760 | H7 | PRP | 205 | 2.724  | 49.466 | 53.112 | 1.00 | 0.00 |
| H      |      |    |     |     |        |        |        |      |      |
| HETATM | 3761 | H8 | PRP | 205 | 2.087  | 50.813 | 54.048 | 1.00 | 0.00 |
| H      |      |    |     |     |        |        |        |      |      |
| HETATM | 3762 | O1 | PRP | 206 | 8.776  | 32.945 | 49.926 | 1.00 | 0.00 |
| O      |      |    |     |     |        |        |        |      |      |
| HETATM | 3763 | H1 | PRP | 206 | 9.383  | 33.660 | 49.724 | 1.00 | 0.00 |
| H      |      |    |     |     |        |        |        |      |      |
| HETATM | 3764 | C1 | PRP | 206 | 7.506  | 33.265 | 49.374 | 1.00 | 0.00 |
| C      |      |    |     |     |        |        |        |      |      |
| HETATM | 3765 | H2 | PRP | 206 | 7.044  | 32.278 | 49.351 | 1.00 | 0.00 |
| H      |      |    |     |     |        |        |        |      |      |
| HETATM | 3766 | H3 | PRP | 206 | 7.006  | 33.918 | 50.090 | 1.00 | 0.00 |
| H      |      |    |     |     |        |        |        |      |      |
| HETATM | 3767 | C2 | PRP | 206 | 7.634  | 33.882 | 47.927 | 1.00 | 0.00 |
| C      |      |    |     |     |        |        |        |      |      |
| HETATM | 3768 | H4 | PRP | 206 | 8.013  | 33.063 | 47.317 | 1.00 | 0.00 |
| H      |      |    |     |     |        |        |        |      |      |
| HETATM | 3769 | O2 | PRP | 206 | 8.382  | 35.138 | 48.028 | 1.00 | 0.00 |
| O      |      |    |     |     |        |        |        |      |      |
| HETATM | 3770 | H5 | PRP | 206 | 9.300  | 34.927 | 48.214 | 1.00 | 0.00 |
| H      |      |    |     |     |        |        |        |      |      |
| HETATM | 3771 | C3 | PRP | 206 | 6.258  | 34.406 | 47.480 | 1.00 | 0.00 |
| C      |      |    |     |     |        |        |        |      |      |
| HETATM | 3772 | H6 | PRP | 206 | 5.482  | 33.668 | 47.276 | 1.00 | 0.00 |
| H      |      |    |     |     |        |        |        |      |      |
| HETATM | 3773 | H7 | PRP | 206 | 5.885  | 35.165 | 48.168 | 1.00 | 0.00 |
| H      |      |    |     |     |        |        |        |      |      |
| HETATM | 3774 | H8 | PRP | 206 | 6.429  | 34.940 | 46.545 | 1.00 | 0.00 |
| H      |      |    |     |     |        |        |        |      |      |
| HETATM | 3775 | O1 | PRP | 207 | 5.660  | 38.006 | 59.240 | 1.00 | 0.00 |
| O      |      |    |     |     |        |        |        |      |      |
| HETATM | 3776 | H1 | PRP | 207 | 6.288  | 38.014 | 58.514 | 1.00 | 0.00 |
| H      |      |    |     |     |        |        |        |      |      |
| HETATM | 3777 | C1 | PRP | 207 | 6.088  | 36.927 | 60.090 | 1.00 | 0.00 |
| C      |      |    |     |     |        |        |        |      |      |
| HETATM | 3778 | H2 | PRP | 207 | 7.052  | 37.224 | 60.503 | 1.00 | 0.00 |
| H      |      |    |     |     |        |        |        |      |      |
| HETATM | 3779 | H3 | PRP | 207 | 5.405  | 36.818 | 60.932 | 1.00 | 0.00 |
| H      |      |    |     |     |        |        |        |      |      |

|        |      |    |     |     |        |        |        |      |      |
|--------|------|----|-----|-----|--------|--------|--------|------|------|
| HETATM | 3780 | C2 | PRP | 207 | 6.095  | 35.514 | 59.389 | 1.00 | 0.00 |
| C      |      |    |     |     |        |        |        |      |      |
| HETATM | 3781 | H4 | PRP | 207 | 6.279  | 34.840 | 60.226 | 1.00 | 0.00 |
| H      |      |    |     |     |        |        |        |      |      |
| HETATM | 3782 | O2 | PRP | 207 | 7.168  | 35.464 | 58.435 | 1.00 | 0.00 |
| O      |      |    |     |     |        |        |        |      |      |
| HETATM | 3783 | H5 | PRP | 207 | 6.817  | 35.623 | 57.555 | 1.00 | 0.00 |
| H      |      |    |     |     |        |        |        |      |      |
| HETATM | 3784 | C3 | PRP | 207 | 4.759  | 35.171 | 58.811 | 1.00 | 0.00 |
| C      |      |    |     |     |        |        |        |      |      |
| HETATM | 3785 | H6 | PRP | 207 | 4.673  | 35.787 | 57.916 | 1.00 | 0.00 |
| H      |      |    |     |     |        |        |        |      |      |
| HETATM | 3786 | H7 | PRP | 207 | 4.733  | 34.107 | 58.574 | 1.00 | 0.00 |
| H      |      |    |     |     |        |        |        |      |      |
| HETATM | 3787 | H8 | PRP | 207 | 3.923  | 35.436 | 59.458 | 1.00 | 0.00 |
| H      |      |    |     |     |        |        |        |      |      |
| HETATM | 3788 | O1 | PRP | 208 | 7.646  | 40.261 | 59.145 | 1.00 | 0.00 |
| O      |      |    |     |     |        |        |        |      |      |
| HETATM | 3789 | H1 | PRP | 208 | 7.884  | 40.994 | 58.573 | 1.00 | 0.00 |
| H      |      |    |     |     |        |        |        |      |      |
| HETATM | 3790 | C1 | PRP | 208 | 8.515  | 40.139 | 60.265 | 1.00 | 0.00 |
| C      |      |    |     |     |        |        |        |      |      |
| HETATM | 3791 | H2 | PRP | 208 | 8.506  | 40.982 | 60.956 | 1.00 | 0.00 |
| H      |      |    |     |     |        |        |        |      |      |
| HETATM | 3792 | H3 | PRP | 208 | 8.210  | 39.262 | 60.836 | 1.00 | 0.00 |
| H      |      |    |     |     |        |        |        |      |      |
| HETATM | 3793 | C2 | PRP | 208 | 9.948  | 39.813 | 59.755 | 1.00 | 0.00 |
| C      |      |    |     |     |        |        |        |      |      |
| HETATM | 3794 | H4 | PRP | 208 | 10.454 | 39.372 | 60.613 | 1.00 | 0.00 |
| H      |      |    |     |     |        |        |        |      |      |
| HETATM | 3795 | O2 | PRP | 208 | 10.505 | 41.049 | 59.416 | 1.00 | 0.00 |
| O      |      |    |     |     |        |        |        |      |      |
| HETATM | 3796 | H5 | PRP | 208 | 10.636 | 41.641 | 60.160 | 1.00 | 0.00 |
| H      |      |    |     |     |        |        |        |      |      |
| HETATM | 3797 | C3 | PRP | 208 | 10.230 | 38.809 | 58.609 | 1.00 | 0.00 |
| C      |      |    |     |     |        |        |        |      |      |
| HETATM | 3798 | H6 | PRP | 208 | 11.301 | 38.608 | 58.563 | 1.00 | 0.00 |
| H      |      |    |     |     |        |        |        |      |      |
| HETATM | 3799 | H7 | PRP | 208 | 9.785  | 37.824 | 58.752 | 1.00 | 0.00 |
| H      |      |    |     |     |        |        |        |      |      |
| HETATM | 3800 | H8 | PRP | 208 | 9.863  | 39.173 | 57.650 | 1.00 | 0.00 |
| H      |      |    |     |     |        |        |        |      |      |
| HETATM | 3801 | O1 | PRP | 209 | 12.124 | 49.885 | 49.767 | 1.00 | 0.00 |
| O      |      |    |     |     |        |        |        |      |      |
| HETATM | 3802 | H1 | PRP | 209 | 12.821 | 49.572 | 50.347 | 1.00 | 0.00 |
| H      |      |    |     |     |        |        |        |      |      |
| HETATM | 3803 | C1 | PRP | 209 | 12.417 | 49.856 | 48.362 | 1.00 | 0.00 |
| C      |      |    |     |     |        |        |        |      |      |
| HETATM | 3804 | H2 | PRP | 209 | 12.215 | 50.833 | 47.923 | 1.00 | 0.00 |
| H      |      |    |     |     |        |        |        |      |      |
| HETATM | 3805 | H3 | PRP | 209 | 13.486 | 49.673 | 48.256 | 1.00 | 0.00 |
| H      |      |    |     |     |        |        |        |      |      |
| HETATM | 3806 | C2 | PRP | 209 | 11.502 | 48.851 | 47.676 | 1.00 | 0.00 |
| C      |      |    |     |     |        |        |        |      |      |
| HETATM | 3807 | H4 | PRP | 209 | 10.475 | 49.189 | 47.817 | 1.00 | 0.00 |
| H      |      |    |     |     |        |        |        |      |      |

|        |      |    |     |     |        |        |        |      |      |
|--------|------|----|-----|-----|--------|--------|--------|------|------|
| HETATM | 3808 | O2 | PRP | 209 | 11.715 | 47.566 | 48.325 | 1.00 | 0.00 |
| O      |      |    |     |     |        |        |        |      |      |
| HETATM | 3809 | H5 | PRP | 209 | 11.703 | 47.732 | 49.271 | 1.00 | 0.00 |
| H      |      |    |     |     |        |        |        |      |      |
| HETATM | 3810 | C3 | PRP | 209 | 11.794 | 48.725 | 46.240 | 1.00 | 0.00 |
| C      |      |    |     |     |        |        |        |      |      |
| HETATM | 3811 | H6 | PRP | 209 | 11.150 | 48.053 | 45.673 | 1.00 | 0.00 |
| H      |      |    |     |     |        |        |        |      |      |
| HETATM | 3812 | H7 | PRP | 209 | 11.697 | 49.664 | 45.696 | 1.00 | 0.00 |
| H      |      |    |     |     |        |        |        |      |      |
| HETATM | 3813 | H8 | PRP | 209 | 12.812 | 48.371 | 46.074 | 1.00 | 0.00 |
| H      |      |    |     |     |        |        |        |      |      |
| HETATM | 3814 | O1 | PRP | 210 | 41.312 | 53.155 | 36.316 | 1.00 | 0.00 |
| O      |      |    |     |     |        |        |        |      |      |
| HETATM | 3815 | H1 | PRP | 210 | 41.365 | 52.722 | 35.460 | 1.00 | 0.00 |
| H      |      |    |     |     |        |        |        |      |      |
| HETATM | 3816 | C1 | PRP | 210 | 40.598 | 52.344 | 37.249 | 1.00 | 0.00 |
| C      |      |    |     |     |        |        |        |      |      |
| HETATM | 3817 | H2 | PRP | 210 | 39.529 | 52.436 | 37.053 | 1.00 | 0.00 |
| H      |      |    |     |     |        |        |        |      |      |
| HETATM | 3818 | H3 | PRP | 210 | 40.855 | 51.313 | 37.009 | 1.00 | 0.00 |
| H      |      |    |     |     |        |        |        |      |      |
| HETATM | 3819 | C2 | PRP | 210 | 41.013 | 52.455 | 38.621 | 1.00 | 0.00 |
| C      |      |    |     |     |        |        |        |      |      |
| HETATM | 3820 | H4 | PRP | 210 | 40.341 | 51.740 | 39.096 | 1.00 | 0.00 |
| H      |      |    |     |     |        |        |        |      |      |
| HETATM | 3821 | O2 | PRP | 210 | 40.738 | 53.797 | 39.040 | 1.00 | 0.00 |
| O      |      |    |     |     |        |        |        |      |      |
| HETATM | 3822 | H5 | PRP | 210 | 40.453 | 54.287 | 38.265 | 1.00 | 0.00 |
| H      |      |    |     |     |        |        |        |      |      |
| HETATM | 3823 | C3 | PRP | 210 | 42.425 | 52.177 | 38.878 | 1.00 | 0.00 |
| C      |      |    |     |     |        |        |        |      |      |
| HETATM | 3824 | H6 | PRP | 210 | 42.611 | 51.204 | 38.425 | 1.00 | 0.00 |
| H      |      |    |     |     |        |        |        |      |      |
| HETATM | 3825 | H7 | PRP | 210 | 43.090 | 52.819 | 38.300 | 1.00 | 0.00 |
| H      |      |    |     |     |        |        |        |      |      |
| HETATM | 3826 | H8 | PRP | 210 | 42.652 | 52.162 | 39.944 | 1.00 | 0.00 |
| H      |      |    |     |     |        |        |        |      |      |
| HETATM | 3827 | O1 | PRP | 211 | 27.156 | 18.246 | 53.953 | 1.00 | 0.00 |
| O      |      |    |     |     |        |        |        |      |      |
| HETATM | 3828 | H1 | PRP | 211 | 27.679 | 17.571 | 53.515 | 1.00 | 0.00 |
| H      |      |    |     |     |        |        |        |      |      |
| HETATM | 3829 | C1 | PRP | 211 | 27.511 | 19.598 | 53.654 | 1.00 | 0.00 |
| C      |      |    |     |     |        |        |        |      |      |
| HETATM | 3830 | H2 | PRP | 211 | 28.259 | 19.984 | 54.345 | 1.00 | 0.00 |
| H      |      |    |     |     |        |        |        |      |      |
| HETATM | 3831 | H3 | PRP | 211 | 27.885 | 19.742 | 52.640 | 1.00 | 0.00 |
| H      |      |    |     |     |        |        |        |      |      |
| HETATM | 3832 | C2 | PRP | 211 | 26.261 | 20.537 | 53.482 | 1.00 | 0.00 |
| C      |      |    |     |     |        |        |        |      |      |
| HETATM | 3833 | H4 | PRP | 211 | 26.425 | 21.615 | 53.492 | 1.00 | 0.00 |
| H      |      |    |     |     |        |        |        |      |      |
| HETATM | 3834 | O2 | PRP | 211 | 25.541 | 20.199 | 54.748 | 1.00 | 0.00 |
| O      |      |    |     |     |        |        |        |      |      |
| HETATM | 3835 | H5 | PRP | 211 | 25.704 | 19.255 | 54.812 | 1.00 | 0.00 |
| H      |      |    |     |     |        |        |        |      |      |

|        |      |    |     |     |        |        |        |      |      |
|--------|------|----|-----|-----|--------|--------|--------|------|------|
| HETATM | 3836 | C3 | PRP | 211 | 25.240 | 20.149 | 52.406 | 1.00 | 0.00 |
| C      |      |    |     |     |        |        |        |      |      |
| HETATM | 3837 | H6 | PRP | 211 | 24.202 | 20.346 | 52.674 | 1.00 | 0.00 |
| H      |      |    |     |     |        |        |        |      |      |
| HETATM | 3838 | H7 | PRP | 211 | 25.338 | 20.650 | 51.443 | 1.00 | 0.00 |
| H      |      |    |     |     |        |        |        |      |      |
| HETATM | 3839 | H8 | PRP | 211 | 25.379 | 19.069 | 52.351 | 1.00 | 0.00 |
| H      |      |    |     |     |        |        |        |      |      |
| HETATM | 3840 | O1 | PRP | 212 | 5.275  | 39.495 | 49.378 | 1.00 | 0.00 |
| O      |      |    |     |     |        |        |        |      |      |
| HETATM | 3841 | H1 | PRP | 212 | 5.073  | 38.741 | 48.820 | 1.00 | 0.00 |
| H      |      |    |     |     |        |        |        |      |      |
| HETATM | 3842 | C1 | PRP | 212 | 6.655  | 39.460 | 49.680 | 1.00 | 0.00 |
| C      |      |    |     |     |        |        |        |      |      |
| HETATM | 3843 | H2 | PRP | 212 | 7.179  | 40.072 | 48.947 | 1.00 | 0.00 |
| H      |      |    |     |     |        |        |        |      |      |
| HETATM | 3844 | H3 | PRP | 212 | 6.736  | 39.816 | 50.707 | 1.00 | 0.00 |
| H      |      |    |     |     |        |        |        |      |      |
| HETATM | 3845 | C2 | PRP | 212 | 7.246  | 38.095 | 49.690 | 1.00 | 0.00 |
| C      |      |    |     |     |        |        |        |      |      |
| HETATM | 3846 | H4 | PRP | 212 | 8.291  | 38.186 | 49.984 | 1.00 | 0.00 |
| H      |      |    |     |     |        |        |        |      |      |
| HETATM | 3847 | O2 | PRP | 212 | 7.274  | 37.582 | 48.335 | 1.00 | 0.00 |
| O      |      |    |     |     |        |        |        |      |      |
| HETATM | 3848 | H5 | PRP | 212 | 7.630  | 36.697 | 48.227 | 1.00 | 0.00 |
| H      |      |    |     |     |        |        |        |      |      |
| HETATM | 3849 | C3 | PRP | 212 | 6.389  | 37.055 | 50.455 | 1.00 | 0.00 |
| C      |      |    |     |     |        |        |        |      |      |
| HETATM | 3850 | H6 | PRP | 212 | 5.985  | 37.457 | 51.385 | 1.00 | 0.00 |
| H      |      |    |     |     |        |        |        |      |      |
| HETATM | 3851 | H7 | PRP | 212 | 5.581  | 36.664 | 49.836 | 1.00 | 0.00 |
| H      |      |    |     |     |        |        |        |      |      |
| HETATM | 3852 | H8 | PRP | 212 | 6.977  | 36.154 | 50.630 | 1.00 | 0.00 |
| H      |      |    |     |     |        |        |        |      |      |
| HETATM | 3853 | O1 | PRP | 213 | 7.325  | 53.396 | 56.296 | 1.00 | 0.00 |
| O      |      |    |     |     |        |        |        |      |      |
| HETATM | 3854 | H1 | PRP | 213 | 7.500  | 53.561 | 55.366 | 1.00 | 0.00 |
| H      |      |    |     |     |        |        |        |      |      |
| HETATM | 3855 | C1 | PRP | 213 | 5.941  | 53.455 | 56.542 | 1.00 | 0.00 |
| C      |      |    |     |     |        |        |        |      |      |
| HETATM | 3856 | H2 | PRP | 213 | 5.615  | 52.826 | 57.370 | 1.00 | 0.00 |
| H      |      |    |     |     |        |        |        |      |      |
| HETATM | 3857 | H3 | PRP | 213 | 5.855  | 54.524 | 56.736 | 1.00 | 0.00 |
| H      |      |    |     |     |        |        |        |      |      |
| HETATM | 3858 | C2 | PRP | 213 | 5.182  | 53.186 | 55.181 | 1.00 | 0.00 |
| C      |      |    |     |     |        |        |        |      |      |
| HETATM | 3859 | H4 | PRP | 213 | 5.311  | 52.123 | 54.977 | 1.00 | 0.00 |
| H      |      |    |     |     |        |        |        |      |      |
| HETATM | 3860 | O2 | PRP | 213 | 5.626  | 53.836 | 54.053 | 1.00 | 0.00 |
| O      |      |    |     |     |        |        |        |      |      |
| HETATM | 3861 | H5 | PRP | 213 | 5.237  | 53.425 | 53.277 | 1.00 | 0.00 |
| H      |      |    |     |     |        |        |        |      |      |
| HETATM | 3862 | C3 | PRP | 213 | 3.743  | 53.428 | 55.414 | 1.00 | 0.00 |
| C      |      |    |     |     |        |        |        |      |      |
| HETATM | 3863 | H6 | PRP | 213 | 3.391  | 52.834 | 56.257 | 1.00 | 0.00 |
| H      |      |    |     |     |        |        |        |      |      |

|        |      |    |     |     |        |        |        |      |      |
|--------|------|----|-----|-----|--------|--------|--------|------|------|
| HETATM | 3864 | H7 | PRP | 213 | 3.602  | 54.498 | 55.568 | 1.00 | 0.00 |
| H      |      |    |     |     |        |        |        |      |      |
| HETATM | 3865 | H8 | PRP | 213 | 3.088  | 53.122 | 54.598 | 1.00 | 0.00 |
| H      |      |    |     |     |        |        |        |      |      |
| HETATM | 3866 | O1 | PRP | 214 | 24.894 | 47.454 | 56.269 | 1.00 | 0.00 |
| O      |      |    |     |     |        |        |        |      |      |
| HETATM | 3867 | H1 | PRP | 214 | 24.139 | 47.009 | 56.662 | 1.00 | 0.00 |
| H      |      |    |     |     |        |        |        |      |      |
| HETATM | 3868 | C1 | PRP | 214 | 24.477 | 48.568 | 55.447 | 1.00 | 0.00 |
| C      |      |    |     |     |        |        |        |      |      |
| HETATM | 3869 | H2 | PRP | 214 | 24.140 | 49.410 | 56.052 | 1.00 | 0.00 |
| H      |      |    |     |     |        |        |        |      |      |
| HETATM | 3870 | H3 | PRP | 214 | 25.314 | 48.986 | 54.887 | 1.00 | 0.00 |
| H      |      |    |     |     |        |        |        |      |      |
| HETATM | 3871 | C2 | PRP | 214 | 23.341 | 48.303 | 54.471 | 1.00 | 0.00 |
| C      |      |    |     |     |        |        |        |      |      |
| HETATM | 3872 | H4 | PRP | 214 | 23.217 | 49.165 | 53.815 | 1.00 | 0.00 |
| H      |      |    |     |     |        |        |        |      |      |
| HETATM | 3873 | O2 | PRP | 214 | 22.139 | 48.017 | 55.054 | 1.00 | 0.00 |
| O      |      |    |     |     |        |        |        |      |      |
| HETATM | 3874 | H5 | PRP | 214 | 21.932 | 48.848 | 55.487 | 1.00 | 0.00 |
| H      |      |    |     |     |        |        |        |      |      |
| HETATM | 3875 | C3 | PRP | 214 | 23.630 | 47.077 | 53.671 | 1.00 | 0.00 |
| C      |      |    |     |     |        |        |        |      |      |
| HETATM | 3876 | H6 | PRP | 214 | 24.489 | 47.318 | 53.045 | 1.00 | 0.00 |
| H      |      |    |     |     |        |        |        |      |      |
| HETATM | 3877 | H7 | PRP | 214 | 23.882 | 46.185 | 54.244 | 1.00 | 0.00 |
| H      |      |    |     |     |        |        |        |      |      |
| HETATM | 3878 | H8 | PRP | 214 | 22.857 | 46.750 | 52.975 | 1.00 | 0.00 |
| H      |      |    |     |     |        |        |        |      |      |
| HETATM | 3879 | O1 | PRP | 215 | 11.352 | 41.911 | 54.461 | 1.00 | 0.00 |
| O      |      |    |     |     |        |        |        |      |      |
| HETATM | 3880 | H1 | PRP | 215 | 12.071 | 41.321 | 54.697 | 1.00 | 0.00 |
| H      |      |    |     |     |        |        |        |      |      |
| HETATM | 3881 | C1 | PRP | 215 | 10.239 | 41.126 | 53.997 | 1.00 | 0.00 |
| C      |      |    |     |     |        |        |        |      |      |
| HETATM | 3882 | H2 | PRP | 215 | 9.937  | 40.313 | 54.657 | 1.00 | 0.00 |
| H      |      |    |     |     |        |        |        |      |      |
| HETATM | 3883 | H3 | PRP | 215 | 9.511  | 41.934 | 53.917 | 1.00 | 0.00 |
| H      |      |    |     |     |        |        |        |      |      |
| HETATM | 3884 | C2 | PRP | 215 | 10.584 | 40.539 | 52.618 | 1.00 | 0.00 |
| C      |      |    |     |     |        |        |        |      |      |
| HETATM | 3885 | H4 | PRP | 215 | 11.589 | 40.118 | 52.593 | 1.00 | 0.00 |
| H      |      |    |     |     |        |        |        |      |      |
| HETATM | 3886 | O2 | PRP | 215 | 10.364 | 41.551 | 51.741 | 1.00 | 0.00 |
| O      |      |    |     |     |        |        |        |      |      |
| HETATM | 3887 | H5 | PRP | 215 | 9.916  | 41.131 | 51.003 | 1.00 | 0.00 |
| H      |      |    |     |     |        |        |        |      |      |
| HETATM | 3888 | C3 | PRP | 215 | 9.630  | 39.359 | 52.313 | 1.00 | 0.00 |
| C      |      |    |     |     |        |        |        |      |      |
| HETATM | 3889 | H6 | PRP | 215 | 9.805  | 38.602 | 53.077 | 1.00 | 0.00 |
| H      |      |    |     |     |        |        |        |      |      |
| HETATM | 3890 | H7 | PRP | 215 | 8.603  | 39.722 | 52.264 | 1.00 | 0.00 |
| H      |      |    |     |     |        |        |        |      |      |
| HETATM | 3891 | H8 | PRP | 215 | 9.851  | 38.857 | 51.371 | 1.00 | 0.00 |
| H      |      |    |     |     |        |        |        |      |      |

|        |      |    |     |     |        |        |        |      |      |
|--------|------|----|-----|-----|--------|--------|--------|------|------|
| HETATM | 3892 | O1 | PRP | 216 | 15.969 | 37.577 | 46.595 | 1.00 | 0.00 |
| O      |      |    |     |     |        |        |        |      |      |
| HETATM | 3893 | H1 | PRP | 216 | 15.707 | 38.040 | 47.394 | 1.00 | 0.00 |
| H      |      |    |     |     |        |        |        |      |      |
| HETATM | 3894 | C1 | PRP | 216 | 15.161 | 38.180 | 45.562 | 1.00 | 0.00 |
| C      |      |    |     |     |        |        |        |      |      |
| HETATM | 3895 | H2 | PRP | 216 | 15.058 | 37.354 | 44.859 | 1.00 | 0.00 |
| H      |      |    |     |     |        |        |        |      |      |
| HETATM | 3896 | H3 | PRP | 216 | 14.231 | 38.411 | 46.081 | 1.00 | 0.00 |
| H      |      |    |     |     |        |        |        |      |      |
| HETATM | 3897 | C2 | PRP | 216 | 15.687 | 39.549 | 45.078 | 1.00 | 0.00 |
| C      |      |    |     |     |        |        |        |      |      |
| HETATM | 3898 | H4 | PRP | 216 | 14.993 | 40.033 | 44.390 | 1.00 | 0.00 |
| H      |      |    |     |     |        |        |        |      |      |
| HETATM | 3899 | O2 | PRP | 216 | 16.904 | 39.240 | 44.409 | 1.00 | 0.00 |
| O      |      |    |     |     |        |        |        |      |      |
| HETATM | 3900 | H5 | PRP | 216 | 17.198 | 38.457 | 44.879 | 1.00 | 0.00 |
| H      |      |    |     |     |        |        |        |      |      |
| HETATM | 3901 | C3 | PRP | 216 | 16.021 | 40.532 | 46.274 | 1.00 | 0.00 |
| C      |      |    |     |     |        |        |        |      |      |
| HETATM | 3902 | H6 | PRP | 216 | 16.451 | 41.468 | 45.917 | 1.00 | 0.00 |
| H      |      |    |     |     |        |        |        |      |      |
| HETATM | 3903 | H7 | PRP | 216 | 15.100 | 40.920 | 46.709 | 1.00 | 0.00 |
| H      |      |    |     |     |        |        |        |      |      |
| HETATM | 3904 | H8 | PRP | 216 | 16.665 | 40.156 | 47.069 | 1.00 | 0.00 |
| H      |      |    |     |     |        |        |        |      |      |
| HETATM | 3905 | O1 | PRP | 217 | 28.344 | 46.414 | 47.684 | 1.00 | 0.00 |
| O      |      |    |     |     |        |        |        |      |      |
| HETATM | 3906 | H1 | PRP | 217 | 27.676 | 46.468 | 46.997 | 1.00 | 0.00 |
| H      |      |    |     |     |        |        |        |      |      |
| HETATM | 3907 | C1 | PRP | 217 | 28.894 | 45.162 | 47.381 | 1.00 | 0.00 |
| C      |      |    |     |     |        |        |        |      |      |
| HETATM | 3908 | H2 | PRP | 217 | 29.482 | 44.887 | 48.256 | 1.00 | 0.00 |
| H      |      |    |     |     |        |        |        |      |      |
| HETATM | 3909 | H3 | PRP | 217 | 28.109 | 44.410 | 47.301 | 1.00 | 0.00 |
| H      |      |    |     |     |        |        |        |      |      |
| HETATM | 3910 | C2 | PRP | 217 | 29.762 | 45.401 | 46.108 | 1.00 | 0.00 |
| C      |      |    |     |     |        |        |        |      |      |
| HETATM | 3911 | H4 | PRP | 217 | 30.469 | 46.206 | 46.307 | 1.00 | 0.00 |
| H      |      |    |     |     |        |        |        |      |      |
| HETATM | 3912 | O2 | PRP | 217 | 28.823 | 45.838 | 45.118 | 1.00 | 0.00 |
| O      |      |    |     |     |        |        |        |      |      |
| HETATM | 3913 | H5 | PRP | 217 | 28.621 | 45.179 | 44.450 | 1.00 | 0.00 |
| H      |      |    |     |     |        |        |        |      |      |
| HETATM | 3914 | C3 | PRP | 217 | 30.505 | 44.073 | 45.672 | 1.00 | 0.00 |
| C      |      |    |     |     |        |        |        |      |      |
| HETATM | 3915 | H6 | PRP | 217 | 31.225 | 44.292 | 44.884 | 1.00 | 0.00 |
| H      |      |    |     |     |        |        |        |      |      |
| HETATM | 3916 | H7 | PRP | 217 | 31.027 | 43.829 | 46.597 | 1.00 | 0.00 |
| H      |      |    |     |     |        |        |        |      |      |
| HETATM | 3917 | H8 | PRP | 217 | 29.961 | 43.214 | 45.277 | 1.00 | 0.00 |
| H      |      |    |     |     |        |        |        |      |      |
| HETATM | 3918 | O1 | PRP | 218 | 7.707  | 22.750 | 53.519 | 1.00 | 0.00 |
| O      |      |    |     |     |        |        |        |      |      |
| HETATM | 3919 | H1 | PRP | 218 | 7.627  | 21.861 | 53.164 | 1.00 | 0.00 |
| H      |      |    |     |     |        |        |        |      |      |

|        |      |    |     |     |        |        |        |      |      |
|--------|------|----|-----|-----|--------|--------|--------|------|------|
| HETATM | 3920 | C1 | PRP | 218 | 9.010  | 23.244 | 53.173 | 1.00 | 0.00 |
| C      |      |    |     |     |        |        |        |      |      |
| HETATM | 3921 | H2 | PRP | 218 | 9.256  | 22.621 | 52.312 | 1.00 | 0.00 |
| H      |      |    |     |     |        |        |        |      |      |
| HETATM | 3922 | H3 | PRP | 218 | 8.893  | 24.274 | 52.838 | 1.00 | 0.00 |
| H      |      |    |     |     |        |        |        |      |      |
| HETATM | 3923 | C2 | PRP | 218 | 9.864  | 22.947 | 54.373 | 1.00 | 0.00 |
| C      |      |    |     |     |        |        |        |      |      |
| HETATM | 3924 | H4 | PRP | 218 | 9.741  | 21.903 | 54.663 | 1.00 | 0.00 |
| H      |      |    |     |     |        |        |        |      |      |
| HETATM | 3925 | O2 | PRP | 218 | 9.566  | 23.814 | 55.487 | 1.00 | 0.00 |
| O      |      |    |     |     |        |        |        |      |      |
| HETATM | 3926 | H5 | PRP | 218 | 10.376 | 24.008 | 55.963 | 1.00 | 0.00 |
| H      |      |    |     |     |        |        |        |      |      |
| HETATM | 3927 | C3 | PRP | 218 | 11.383 | 23.050 | 54.083 | 1.00 | 0.00 |
| C      |      |    |     |     |        |        |        |      |      |
| HETATM | 3928 | H6 | PRP | 218 | 11.694 | 22.539 | 53.171 | 1.00 | 0.00 |
| H      |      |    |     |     |        |        |        |      |      |
| HETATM | 3929 | H7 | PRP | 218 | 11.664 | 24.102 | 54.114 | 1.00 | 0.00 |
| H      |      |    |     |     |        |        |        |      |      |
| HETATM | 3930 | H8 | PRP | 218 | 12.007 | 22.687 | 54.899 | 1.00 | 0.00 |
| H      |      |    |     |     |        |        |        |      |      |
| HETATM | 3931 | O1 | PRP | 219 | 25.649 | 20.943 | 40.549 | 1.00 | 0.00 |
| O      |      |    |     |     |        |        |        |      |      |
| HETATM | 3932 | H1 | PRP | 219 | 25.014 | 21.603 | 40.261 | 1.00 | 0.00 |
| H      |      |    |     |     |        |        |        |      |      |
| HETATM | 3933 | C1 | PRP | 219 | 25.118 | 20.135 | 41.619 | 1.00 | 0.00 |
| C      |      |    |     |     |        |        |        |      |      |
| HETATM | 3934 | H2 | PRP | 219 | 24.452 | 19.316 | 41.348 | 1.00 | 0.00 |
| H      |      |    |     |     |        |        |        |      |      |
| HETATM | 3935 | H3 | PRP | 219 | 25.980 | 19.619 | 42.040 | 1.00 | 0.00 |
| H      |      |    |     |     |        |        |        |      |      |
| HETATM | 3936 | C2 | PRP | 219 | 24.521 | 21.027 | 42.663 | 1.00 | 0.00 |
| C      |      |    |     |     |        |        |        |      |      |
| HETATM | 3937 | H4 | PRP | 219 | 24.346 | 20.385 | 43.526 | 1.00 | 0.00 |
| H      |      |    |     |     |        |        |        |      |      |
| HETATM | 3938 | O2 | PRP | 219 | 23.293 | 21.556 | 42.227 | 1.00 | 0.00 |
| O      |      |    |     |     |        |        |        |      |      |
| HETATM | 3939 | H5 | PRP | 219 | 23.176 | 22.482 | 42.454 | 1.00 | 0.00 |
| H      |      |    |     |     |        |        |        |      |      |
| HETATM | 3940 | C3 | PRP | 219 | 25.487 | 22.222 | 43.036 | 1.00 | 0.00 |
| C      |      |    |     |     |        |        |        |      |      |
| HETATM | 3941 | H6 | PRP | 219 | 25.500 | 23.067 | 42.348 | 1.00 | 0.00 |
| H      |      |    |     |     |        |        |        |      |      |
| HETATM | 3942 | H7 | PRP | 219 | 25.175 | 22.639 | 43.994 | 1.00 | 0.00 |
| H      |      |    |     |     |        |        |        |      |      |
| HETATM | 3943 | H8 | PRP | 219 | 26.527 | 21.906 | 43.119 | 1.00 | 0.00 |
| H      |      |    |     |     |        |        |        |      |      |
| HETATM | 3944 | O1 | PRP | 220 | 13.331 | 29.946 | 47.354 | 1.00 | 0.00 |
| O      |      |    |     |     |        |        |        |      |      |
| HETATM | 3945 | H1 | PRP | 220 | 12.856 | 29.138 | 47.562 | 1.00 | 0.00 |
| H      |      |    |     |     |        |        |        |      |      |
| HETATM | 3946 | C1 | PRP | 220 | 12.482 | 30.748 | 46.619 | 1.00 | 0.00 |
| C      |      |    |     |     |        |        |        |      |      |
| HETATM | 3947 | H2 | PRP | 220 | 12.441 | 30.272 | 45.639 | 1.00 | 0.00 |
| H      |      |    |     |     |        |        |        |      |      |



|        |      |    |     |     |        |        |        |      |      |
|--------|------|----|-----|-----|--------|--------|--------|------|------|
| HETATM | 3948 | H3 | PRP | 220 | 11.517 | 30.720 | 47.124 | 1.00 | 0.00 |
| H      |      |    |     |     |        |        |        |      |      |
| HETATM | 3949 | C2 | PRP | 220 | 12.945 | 32.221 | 46.628 | 1.00 | 0.00 |
| C      |      |    |     |     |        |        |        |      |      |
| HETATM | 3950 | H4 | PRP | 220 | 14.000 | 32.359 | 46.391 | 1.00 | 0.00 |
| H      |      |    |     |     |        |        |        |      |      |
| HETATM | 3951 | O2 | PRP | 220 | 12.680 | 32.793 | 47.898 | 1.00 | 0.00 |
| O      |      |    |     |     |        |        |        |      |      |
| HETATM | 3952 | H5 | PRP | 220 | 12.487 | 32.018 | 48.430 | 1.00 | 0.00 |
| H      |      |    |     |     |        |        |        |      |      |
| HETATM | 3953 | C3 | PRP | 220 | 12.277 | 33.044 | 45.617 | 1.00 | 0.00 |
| C      |      |    |     |     |        |        |        |      |      |
| HETATM | 3954 | H6 | PRP | 220 | 12.765 | 34.018 | 45.575 | 1.00 | 0.00 |
| H      |      |    |     |     |        |        |        |      |      |
| HETATM | 3955 | H7 | PRP | 220 | 12.421 | 32.601 | 44.631 | 1.00 | 0.00 |
| H      |      |    |     |     |        |        |        |      |      |
| HETATM | 3956 | H8 | PRP | 220 | 11.200 | 33.091 | 45.780 | 1.00 | 0.00 |
| H      |      |    |     |     |        |        |        |      |      |
| HETATM | 3957 | O1 | PRP | 221 | 6.310  | 23.684 | 55.661 | 1.00 | 0.00 |
| O      |      |    |     |     |        |        |        |      |      |
| HETATM | 3958 | H1 | PRP | 221 | 6.814  | 23.626 | 54.846 | 1.00 | 0.00 |
| H      |      |    |     |     |        |        |        |      |      |
| HETATM | 3959 | C1 | PRP | 221 | 5.965  | 25.011 | 56.096 | 1.00 | 0.00 |
| C      |      |    |     |     |        |        |        |      |      |
| HETATM | 3960 | H2 | PRP | 221 | 5.741  | 25.672 | 55.259 | 1.00 | 0.00 |
| H      |      |    |     |     |        |        |        |      |      |
| HETATM | 3961 | H3 | PRP | 221 | 5.058  | 25.073 | 56.696 | 1.00 | 0.00 |
| H      |      |    |     |     |        |        |        |      |      |
| HETATM | 3962 | C2 | PRP | 221 | 7.131  | 25.683 | 56.873 | 1.00 | 0.00 |
| C      |      |    |     |     |        |        |        |      |      |
| HETATM | 3963 | H4 | PRP | 221 | 7.890  | 25.911 | 56.125 | 1.00 | 0.00 |
| H      |      |    |     |     |        |        |        |      |      |
| HETATM | 3964 | O2 | PRP | 221 | 7.735  | 24.772 | 57.825 | 1.00 | 0.00 |
| O      |      |    |     |     |        |        |        |      |      |
| HETATM | 3965 | H5 | PRP | 221 | 8.080  | 24.034 | 57.317 | 1.00 | 0.00 |
| H      |      |    |     |     |        |        |        |      |      |
| HETATM | 3966 | C3 | PRP | 221 | 6.799  | 26.941 | 57.553 | 1.00 | 0.00 |
| C      |      |    |     |     |        |        |        |      |      |
| HETATM | 3967 | H6 | PRP | 221 | 6.151  | 26.765 | 58.412 | 1.00 | 0.00 |
| H      |      |    |     |     |        |        |        |      |      |
| HETATM | 3968 | H7 | PRP | 221 | 7.741  | 27.175 | 58.049 | 1.00 | 0.00 |
| H      |      |    |     |     |        |        |        |      |      |
| HETATM | 3969 | H8 | PRP | 221 | 6.546  | 27.757 | 56.876 | 1.00 | 0.00 |
| H      |      |    |     |     |        |        |        |      |      |
| HETATM | 3970 | O1 | PRP | 222 | 21.596 | 40.442 | 35.795 | 1.00 | 0.00 |
| O      |      |    |     |     |        |        |        |      |      |
| HETATM | 3971 | H1 | PRP | 222 | 22.352 | 39.875 | 35.968 | 1.00 | 0.00 |
| H      |      |    |     |     |        |        |        |      |      |
| HETATM | 3972 | C1 | PRP | 222 | 21.892 | 41.774 | 36.183 | 1.00 | 0.00 |
| C      |      |    |     |     |        |        |        |      |      |
| HETATM | 3973 | H2 | PRP | 222 | 22.941 | 41.991 | 35.982 | 1.00 | 0.00 |
| H      |      |    |     |     |        |        |        |      |      |
| HETATM | 3974 | H3 | PRP | 222 | 21.403 | 42.473 | 35.504 | 1.00 | 0.00 |
| H      |      |    |     |     |        |        |        |      |      |
| HETATM | 3975 | C2 | PRP | 222 | 21.451 | 42.009 | 37.639 | 1.00 | 0.00 |
| C      |      |    |     |     |        |        |        |      |      |

|        |      |    |     |     |        |        |        |      |      |
|--------|------|----|-----|-----|--------|--------|--------|------|------|
| HETATM | 3976 | H4 | PRP | 222 | 22.178 | 41.569 | 38.321 | 1.00 | 0.00 |
| H      |      |    |     |     |        |        |        |      |      |
| HETATM | 3977 | O2 | PRP | 222 | 20.154 | 41.420 | 37.900 | 1.00 | 0.00 |
| O      |      |    |     |     |        |        |        |      |      |
| HETATM | 3978 | H5 | PRP | 222 | 20.129 | 40.713 | 37.252 | 1.00 | 0.00 |
| H      |      |    |     |     |        |        |        |      |      |
| HETATM | 3979 | C3 | PRP | 222 | 21.402 | 43.473 | 37.995 | 1.00 | 0.00 |
| C      |      |    |     |     |        |        |        |      |      |
| HETATM | 3980 | H6 | PRP | 222 | 20.435 | 43.774 | 38.399 | 1.00 | 0.00 |
| H      |      |    |     |     |        |        |        |      |      |
| HETATM | 3981 | H7 | PRP | 222 | 22.191 | 43.712 | 38.708 | 1.00 | 0.00 |
| H      |      |    |     |     |        |        |        |      |      |
| HETATM | 3982 | H8 | PRP | 222 | 21.559 | 44.042 | 37.079 | 1.00 | 0.00 |
| H      |      |    |     |     |        |        |        |      |      |
| HETATM | 3983 | O1 | PRP | 223 | 19.110 | 41.302 | 44.739 | 1.00 | 0.00 |
| O      |      |    |     |     |        |        |        |      |      |
| HETATM | 3984 | H1 | PRP | 223 | 18.279 | 41.071 | 44.318 | 1.00 | 0.00 |
| H      |      |    |     |     |        |        |        |      |      |
| HETATM | 3985 | C1 | PRP | 223 | 19.512 | 42.495 | 44.051 | 1.00 | 0.00 |
| C      |      |    |     |     |        |        |        |      |      |
| HETATM | 3986 | H2 | PRP | 223 | 19.983 | 43.200 | 44.736 | 1.00 | 0.00 |
| H      |      |    |     |     |        |        |        |      |      |
| HETATM | 3987 | H3 | PRP | 223 | 20.128 | 42.178 | 43.210 | 1.00 | 0.00 |
| H      |      |    |     |     |        |        |        |      |      |
| HETATM | 3988 | C2 | PRP | 223 | 18.273 | 43.215 | 43.552 | 1.00 | 0.00 |
| C      |      |    |     |     |        |        |        |      |      |
| HETATM | 3989 | H4 | PRP | 223 | 17.813 | 43.585 | 44.468 | 1.00 | 0.00 |
| H      |      |    |     |     |        |        |        |      |      |
| HETATM | 3990 | O2 | PRP | 223 | 17.446 | 42.371 | 42.776 | 1.00 | 0.00 |
| O      |      |    |     |     |        |        |        |      |      |
| HETATM | 3991 | H5 | PRP | 223 | 18.112 | 42.006 | 42.189 | 1.00 | 0.00 |
| H      |      |    |     |     |        |        |        |      |      |
| HETATM | 3992 | C3 | PRP | 223 | 18.687 | 44.434 | 42.716 | 1.00 | 0.00 |
| C      |      |    |     |     |        |        |        |      |      |
| HETATM | 3993 | H6 | PRP | 223 | 19.313 | 45.042 | 43.370 | 1.00 | 0.00 |
| H      |      |    |     |     |        |        |        |      |      |
| HETATM | 3994 | H7 | PRP | 223 | 19.159 | 44.190 | 41.765 | 1.00 | 0.00 |
| H      |      |    |     |     |        |        |        |      |      |
| HETATM | 3995 | H8 | PRP | 223 | 17.905 | 45.169 | 42.522 | 1.00 | 0.00 |
| H      |      |    |     |     |        |        |        |      |      |
| HETATM | 3996 | O1 | PRP | 224 | 31.293 | 44.084 | 37.621 | 1.00 | 0.00 |
| O      |      |    |     |     |        |        |        |      |      |
| HETATM | 3997 | H1 | PRP | 224 | 32.171 | 44.378 | 37.367 | 1.00 | 0.00 |
| H      |      |    |     |     |        |        |        |      |      |
| HETATM | 3998 | C1 | PRP | 224 | 31.428 | 43.700 | 38.954 | 1.00 | 0.00 |
| C      |      |    |     |     |        |        |        |      |      |
| HETATM | 3999 | H2 | PRP | 224 | 30.533 | 43.142 | 39.228 | 1.00 | 0.00 |
| H      |      |    |     |     |        |        |        |      |      |
| HETATM | 4000 | H3 | PRP | 224 | 32.167 | 42.930 | 39.172 | 1.00 | 0.00 |
| H      |      |    |     |     |        |        |        |      |      |
| HETATM | 4001 | C2 | PRP | 224 | 31.534 | 44.867 | 39.940 | 1.00 | 0.00 |
| C      |      |    |     |     |        |        |        |      |      |
| HETATM | 4002 | H4 | PRP | 224 | 30.849 | 45.641 | 39.595 | 1.00 | 0.00 |
| H      |      |    |     |     |        |        |        |      |      |
| HETATM | 4003 | O2 | PRP | 224 | 32.848 | 45.384 | 40.176 | 1.00 | 0.00 |
| O      |      |    |     |     |        |        |        |      |      |

|        |      |    |     |     |        |        |        |      |      |
|--------|------|----|-----|-----|--------|--------|--------|------|------|
| HETATM | 4004 | H5 | PRP | 224 | 32.817 | 46.174 | 40.721 | 1.00 | 0.00 |
| H      |      |    |     |     |        |        |        |      |      |
| HETATM | 4005 | C3 | PRP | 224 | 30.960 | 44.418 | 41.301 | 1.00 | 0.00 |
| C      |      |    |     |     |        |        |        |      |      |
| HETATM | 4006 | H6 | PRP | 224 | 31.594 | 43.731 | 41.863 | 1.00 | 0.00 |
| H      |      |    |     |     |        |        |        |      |      |
| HETATM | 4007 | H7 | PRP | 224 | 30.738 | 45.300 | 41.901 | 1.00 | 0.00 |
| H      |      |    |     |     |        |        |        |      |      |
| HETATM | 4008 | H8 | PRP | 224 | 29.996 | 43.929 | 41.163 | 1.00 | 0.00 |
| H      |      |    |     |     |        |        |        |      |      |
| HETATM | 4009 | O1 | PRP | 225 | 1.714  | 44.248 | 53.029 | 1.00 | 0.00 |
| O      |      |    |     |     |        |        |        |      |      |
| HETATM | 4010 | H1 | PRP | 225 | 2.559  | 43.915 | 53.340 | 1.00 | 0.00 |
| H      |      |    |     |     |        |        |        |      |      |
| HETATM | 4011 | C1 | PRP | 225 | 1.761  | 44.703 | 51.668 | 1.00 | 0.00 |
| C      |      |    |     |     |        |        |        |      |      |
| HETATM | 4012 | H2 | PRP | 225 | 2.077  | 45.743 | 51.588 | 1.00 | 0.00 |
| H      |      |    |     |     |        |        |        |      |      |
| HETATM | 4013 | H3 | PRP | 225 | 2.396  | 44.002 | 51.125 | 1.00 | 0.00 |
| H      |      |    |     |     |        |        |        |      |      |
| HETATM | 4014 | C2 | PRP | 225 | 0.408  | 44.551 | 50.925 | 1.00 | 0.00 |
| C      |      |    |     |     |        |        |        |      |      |
| HETATM | 4015 | H4 | PRP | 225 | -0.392 | 44.899 | 51.578 | 1.00 | 0.00 |
| H      |      |    |     |     |        |        |        |      |      |
| HETATM | 4016 | O2 | PRP | 225 | 0.004  | 43.186 | 50.498 | 1.00 | 0.00 |
| O      |      |    |     |     |        |        |        |      |      |
| HETATM | 4017 | H5 | PRP | 225 | -0.281 | 42.703 | 51.277 | 1.00 | 0.00 |
| H      |      |    |     |     |        |        |        |      |      |
| HETATM | 4018 | C3 | PRP | 225 | 0.258  | 45.321 | 49.635 | 1.00 | 0.00 |
| C      |      |    |     |     |        |        |        |      |      |
| HETATM | 4019 | H6 | PRP | 225 | 0.895  | 44.854 | 48.884 | 1.00 | 0.00 |
| H      |      |    |     |     |        |        |        |      |      |
| HETATM | 4020 | H7 | PRP | 225 | -0.759 | 45.170 | 49.275 | 1.00 | 0.00 |
| H      |      |    |     |     |        |        |        |      |      |
| HETATM | 4021 | H8 | PRP | 225 | 0.521  | 46.367 | 49.794 | 1.00 | 0.00 |
| H      |      |    |     |     |        |        |        |      |      |
| HETATM | 4022 | O1 | PRP | 226 | 6.037  | 44.490 | 55.033 | 1.00 | 0.00 |
| O      |      |    |     |     |        |        |        |      |      |
| HETATM | 4023 | H1 | PRP | 226 | 6.287  | 43.619 | 54.716 | 1.00 | 0.00 |
| H      |      |    |     |     |        |        |        |      |      |
| HETATM | 4024 | C1 | PRP | 226 | 5.277  | 45.118 | 53.983 | 1.00 | 0.00 |
| C      |      |    |     |     |        |        |        |      |      |
| HETATM | 4025 | H2 | PRP | 226 | 4.227  | 45.062 | 54.272 | 1.00 | 0.00 |
| H      |      |    |     |     |        |        |        |      |      |
| HETATM | 4026 | H3 | PRP | 226 | 5.595  | 46.156 | 53.887 | 1.00 | 0.00 |
| H      |      |    |     |     |        |        |        |      |      |
| HETATM | 4027 | C2 | PRP | 226 | 5.354  | 44.440 | 52.662 | 1.00 | 0.00 |
| C      |      |    |     |     |        |        |        |      |      |
| HETATM | 4028 | H4 | PRP | 226 | 4.786  | 45.012 | 51.928 | 1.00 | 0.00 |
| H      |      |    |     |     |        |        |        |      |      |
| HETATM | 4029 | O2 | PRP | 226 | 4.797  | 43.184 | 52.634 | 1.00 | 0.00 |
| O      |      |    |     |     |        |        |        |      |      |
| HETATM | 4030 | H5 | PRP | 226 | 4.601  | 42.960 | 51.721 | 1.00 | 0.00 |
| H      |      |    |     |     |        |        |        |      |      |
| HETATM | 4031 | C3 | PRP | 226 | 6.807  | 44.400 | 52.155 | 1.00 | 0.00 |
| C      |      |    |     |     |        |        |        |      |      |

|        |      |    |     |     |        |        |        |      |      |
|--------|------|----|-----|-----|--------|--------|--------|------|------|
| HETATM | 4032 | H6 | PRP | 226 | 7.345  | 45.344 | 52.069 | 1.00 | 0.00 |
| H      |      |    |     |     |        |        |        |      |      |
| HETATM | 4033 | H7 | PRP | 226 | 7.324  | 43.733 | 52.844 | 1.00 | 0.00 |
| H      |      |    |     |     |        |        |        |      |      |
| HETATM | 4034 | H8 | PRP | 226 | 6.925  | 43.873 | 51.208 | 1.00 | 0.00 |
| H      |      |    |     |     |        |        |        |      |      |
| HETATM | 4035 | O1 | PRP | 227 | -6.379 | 30.165 | 47.496 | 1.00 | 0.00 |
| O      |      |    |     |     |        |        |        |      |      |
| HETATM | 4036 | H1 | PRP | 227 | -7.255 | 30.393 | 47.177 | 1.00 | 0.00 |
| H      |      |    |     |     |        |        |        |      |      |
| HETATM | 4037 | C1 | PRP | 227 | -6.281 | 28.824 | 47.671 | 1.00 | 0.00 |
| C      |      |    |     |     |        |        |        |      |      |
| HETATM | 4038 | H2 | PRP | 227 | -5.227 | 28.549 | 47.697 | 1.00 | 0.00 |
| H      |      |    |     |     |        |        |        |      |      |
| HETATM | 4039 | H3 | PRP | 227 | -6.762 | 28.474 | 48.585 | 1.00 | 0.00 |
| H      |      |    |     |     |        |        |        |      |      |
| HETATM | 4040 | C2 | PRP | 227 | -7.121 | 28.105 | 46.513 | 1.00 | 0.00 |
| C      |      |    |     |     |        |        |        |      |      |
| HETATM | 4041 | H4 | PRP | 227 | -6.726 | 28.226 | 45.504 | 1.00 | 0.00 |
| H      |      |    |     |     |        |        |        |      |      |
| HETATM | 4042 | O2 | PRP | 227 | -8.527 | 28.531 | 46.585 | 1.00 | 0.00 |
| O      |      |    |     |     |        |        |        |      |      |
| HETATM | 4043 | H5 | PRP | 227 | -8.886 | 28.460 | 47.473 | 1.00 | 0.00 |
| H      |      |    |     |     |        |        |        |      |      |
| HETATM | 4044 | C3 | PRP | 227 | -7.257 | 26.639 | 46.767 | 1.00 | 0.00 |
| C      |      |    |     |     |        |        |        |      |      |
| HETATM | 4045 | H6 | PRP | 227 | -7.395 | 26.475 | 47.836 | 1.00 | 0.00 |
| H      |      |    |     |     |        |        |        |      |      |
| HETATM | 4046 | H7 | PRP | 227 | -7.893 | 26.072 | 46.087 | 1.00 | 0.00 |
| H      |      |    |     |     |        |        |        |      |      |
| HETATM | 4047 | H8 | PRP | 227 | -6.243 | 26.302 | 46.551 | 1.00 | 0.00 |
| H      |      |    |     |     |        |        |        |      |      |
| HETATM | 4048 | O1 | PRP | 228 | -1.839 | 42.769 | 47.994 | 1.00 | 0.00 |
| O      |      |    |     |     |        |        |        |      |      |
| HETATM | 4049 | H1 | PRP | 228 | -1.397 | 43.098 | 48.780 | 1.00 | 0.00 |
| H      |      |    |     |     |        |        |        |      |      |
| HETATM | 4050 | C1 | PRP | 228 | -0.776 | 42.101 | 47.393 | 1.00 | 0.00 |
| C      |      |    |     |     |        |        |        |      |      |
| HETATM | 4051 | H2 | PRP | 228 | -0.929 | 42.211 | 46.319 | 1.00 | 0.00 |
| H      |      |    |     |     |        |        |        |      |      |
| HETATM | 4052 | H3 | PRP | 228 | 0.143  | 42.535 | 47.785 | 1.00 | 0.00 |
| H      |      |    |     |     |        |        |        |      |      |
| HETATM | 4053 | C2 | PRP | 228 | -0.723 | 40.629 | 47.628 | 1.00 | 0.00 |
| C      |      |    |     |     |        |        |        |      |      |
| HETATM | 4054 | H4 | PRP | 228 | -1.733 | 40.290 | 47.858 | 1.00 | 0.00 |
| H      |      |    |     |     |        |        |        |      |      |
| HETATM | 4055 | O2 | PRP | 228 | 0.093  | 40.261 | 48.676 | 1.00 | 0.00 |
| O      |      |    |     |     |        |        |        |      |      |
| HETATM | 4056 | H5 | PRP | 228 | 0.989  | 40.553 | 48.491 | 1.00 | 0.00 |
| H      |      |    |     |     |        |        |        |      |      |
| HETATM | 4057 | C3 | PRP | 228 | -0.206 | 39.940 | 46.357 | 1.00 | 0.00 |
| C      |      |    |     |     |        |        |        |      |      |
| HETATM | 4058 | H6 | PRP | 228 | -0.377 | 38.866 | 46.290 | 1.00 | 0.00 |
| H      |      |    |     |     |        |        |        |      |      |
| HETATM | 4059 | H7 | PRP | 228 | -0.764 | 40.343 | 45.512 | 1.00 | 0.00 |
| H      |      |    |     |     |        |        |        |      |      |

|        |      |    |     |     |        |        |        |      |      |
|--------|------|----|-----|-----|--------|--------|--------|------|------|
| HETATM | 4060 | H8 | PRP | 228 | 0.852  | 40.151 | 46.201 | 1.00 | 0.00 |
| H      |      |    |     |     |        |        |        |      |      |
| HETATM | 4061 | O1 | PRP | 229 | 12.041 | 36.331 | 47.197 | 1.00 | 0.00 |
| O      |      |    |     |     |        |        |        |      |      |
| HETATM | 4062 | H1 | PRP | 229 | 11.604 | 35.646 | 46.686 | 1.00 | 0.00 |
| H      |      |    |     |     |        |        |        |      |      |
| HETATM | 4063 | C1 | PRP | 229 | 11.283 | 36.840 | 48.297 | 1.00 | 0.00 |
| C      |      |    |     |     |        |        |        |      |      |
| HETATM | 4064 | H2 | PRP | 229 | 11.567 | 37.862 | 48.548 | 1.00 | 0.00 |
| H      |      |    |     |     |        |        |        |      |      |
| HETATM | 4065 | H3 | PRP | 229 | 10.262 | 36.941 | 47.930 | 1.00 | 0.00 |
| H      |      |    |     |     |        |        |        |      |      |
| HETATM | 4066 | C2 | PRP | 229 | 11.413 | 35.849 | 49.409 | 1.00 | 0.00 |
| C      |      |    |     |     |        |        |        |      |      |
| HETATM | 4067 | H4 | PRP | 229 | 12.469 | 35.795 | 49.674 | 1.00 | 0.00 |
| H      |      |    |     |     |        |        |        |      |      |
| HETATM | 4068 | O2 | PRP | 229 | 10.928 | 34.579 | 49.022 | 1.00 | 0.00 |
| O      |      |    |     |     |        |        |        |      |      |
| HETATM | 4069 | H5 | PRP | 229 | 11.639 | 33.990 | 48.759 | 1.00 | 0.00 |
| H      |      |    |     |     |        |        |        |      |      |
| HETATM | 4070 | C3 | PRP | 229 | 10.461 | 36.204 | 50.654 | 1.00 | 0.00 |
| C      |      |    |     |     |        |        |        |      |      |
| HETATM | 4071 | H6 | PRP | 229 | 10.591 | 35.419 | 51.399 | 1.00 | 0.00 |
| H      |      |    |     |     |        |        |        |      |      |
| HETATM | 4072 | H7 | PRP | 229 | 10.844 | 37.140 | 51.059 | 1.00 | 0.00 |
| H      |      |    |     |     |        |        |        |      |      |
| HETATM | 4073 | H8 | PRP | 229 | 9.441  | 36.146 | 50.273 | 1.00 | 0.00 |
| H      |      |    |     |     |        |        |        |      |      |
| HETATM | 4074 | O1 | PRP | 230 | -7.884 | 33.310 | 43.019 | 1.00 | 0.00 |
| O      |      |    |     |     |        |        |        |      |      |
| HETATM | 4075 | H1 | PRP | 230 | -7.581 | 33.694 | 43.845 | 1.00 | 0.00 |
| H      |      |    |     |     |        |        |        |      |      |
| HETATM | 4076 | C1 | PRP | 230 | -6.819 | 33.125 | 42.078 | 1.00 | 0.00 |
| C      |      |    |     |     |        |        |        |      |      |
| HETATM | 4077 | H2 | PRP | 230 | -7.191 | 33.184 | 41.056 | 1.00 | 0.00 |
| H      |      |    |     |     |        |        |        |      |      |
| HETATM | 4078 | H3 | PRP | 230 | -6.208 | 34.005 | 42.281 | 1.00 | 0.00 |
| H      |      |    |     |     |        |        |        |      |      |
| HETATM | 4079 | C2 | PRP | 230 | -6.082 | 31.812 | 42.324 | 1.00 | 0.00 |
| C      |      |    |     |     |        |        |        |      |      |
| HETATM | 4080 | H4 | PRP | 230 | -5.125 | 31.845 | 41.804 | 1.00 | 0.00 |
| H      |      |    |     |     |        |        |        |      |      |
| HETATM | 4081 | O2 | PRP | 230 | -6.839 | 30.705 | 41.896 | 1.00 | 0.00 |
| O      |      |    |     |     |        |        |        |      |      |
| HETATM | 4082 | H5 | PRP | 230 | -7.446 | 30.426 | 42.586 | 1.00 | 0.00 |
| H      |      |    |     |     |        |        |        |      |      |
| HETATM | 4083 | C3 | PRP | 230 | -5.722 | 31.568 | 43.835 | 1.00 | 0.00 |
| C      |      |    |     |     |        |        |        |      |      |
| HETATM | 4084 | H6 | PRP | 230 | -5.243 | 30.589 | 43.878 | 1.00 | 0.00 |
| H      |      |    |     |     |        |        |        |      |      |
| HETATM | 4085 | H7 | PRP | 230 | -4.920 | 32.248 | 44.121 | 1.00 | 0.00 |
| H      |      |    |     |     |        |        |        |      |      |
| HETATM | 4086 | H8 | PRP | 230 | -6.521 | 31.566 | 44.576 | 1.00 | 0.00 |
| H      |      |    |     |     |        |        |        |      |      |
| HETATM | 4087 | O1 | PRP | 231 | 7.786  | 18.236 | 45.174 | 1.00 | 0.00 |
| O      |      |    |     |     |        |        |        |      |      |

|        |      |    |     |     |        |        |        |      |      |
|--------|------|----|-----|-----|--------|--------|--------|------|------|
| HETATM | 4088 | H1 | PRP | 231 | 6.994  | 17.923 | 45.617 | 1.00 | 0.00 |
| H      |      |    |     |     |        |        |        |      |      |
| HETATM | 4089 | C1 | PRP | 231 | 8.695  | 18.696 | 46.235 | 1.00 | 0.00 |
| C      |      |    |     |     |        |        |        |      |      |
| HETATM | 4090 | H2 | PRP | 231 | 9.539  | 18.010 | 46.311 | 1.00 | 0.00 |
| H      |      |    |     |     |        |        |        |      |      |
| HETATM | 4091 | H3 | PRP | 231 | 9.108  | 19.697 | 46.108 | 1.00 | 0.00 |
| H      |      |    |     |     |        |        |        |      |      |
| HETATM | 4092 | C2 | PRP | 231 | 8.019  | 18.580 | 47.560 | 1.00 | 0.00 |
| C      |      |    |     |     |        |        |        |      |      |
| HETATM | 4093 | H4 | PRP | 231 | 8.802  | 18.814 | 48.281 | 1.00 | 0.00 |
| H      |      |    |     |     |        |        |        |      |      |
| HETATM | 4094 | O2 | PRP | 231 | 7.450  | 17.350 | 47.771 | 1.00 | 0.00 |
| O      |      |    |     |     |        |        |        |      |      |
| HETATM | 4095 | H5 | PRP | 231 | 8.070  | 16.621 | 47.847 | 1.00 | 0.00 |
| H      |      |    |     |     |        |        |        |      |      |
| HETATM | 4096 | C3 | PRP | 231 | 6.844  | 19.524 | 47.687 | 1.00 | 0.00 |
| C      |      |    |     |     |        |        |        |      |      |
| HETATM | 4097 | H6 | PRP | 231 | 6.516  | 19.659 | 48.718 | 1.00 | 0.00 |
| H      |      |    |     |     |        |        |        |      |      |
| HETATM | 4098 | H7 | PRP | 231 | 7.079  | 20.562 | 47.451 | 1.00 | 0.00 |
| H      |      |    |     |     |        |        |        |      |      |
| HETATM | 4099 | H8 | PRP | 231 | 5.980  | 19.118 | 47.162 | 1.00 | 0.00 |
| H      |      |    |     |     |        |        |        |      |      |
| HETATM | 4100 | O1 | PRP | 232 | 10.923 | 31.952 | 41.697 | 1.00 | 0.00 |
| O      |      |    |     |     |        |        |        |      |      |
| HETATM | 4101 | H1 | PRP | 232 | 10.501 | 32.092 | 40.846 | 1.00 | 0.00 |
| H      |      |    |     |     |        |        |        |      |      |
| HETATM | 4102 | C1 | PRP | 232 | 9.961  | 31.716 | 42.757 | 1.00 | 0.00 |
| C      |      |    |     |     |        |        |        |      |      |
| HETATM | 4103 | H2 | PRP | 232 | 9.262  | 30.911 | 42.531 | 1.00 | 0.00 |
| H      |      |    |     |     |        |        |        |      |      |
| HETATM | 4104 | H3 | PRP | 232 | 10.510 | 31.438 | 43.656 | 1.00 | 0.00 |
| H      |      |    |     |     |        |        |        |      |      |
| HETATM | 4105 | C2 | PRP | 232 | 9.055  | 32.997 | 42.952 | 1.00 | 0.00 |
| C      |      |    |     |     |        |        |        |      |      |
| HETATM | 4106 | H4 | PRP | 232 | 8.561  | 33.176 | 41.997 | 1.00 | 0.00 |
| H      |      |    |     |     |        |        |        |      |      |
| HETATM | 4107 | O2 | PRP | 232 | 9.994  | 34.063 | 43.146 | 1.00 | 0.00 |
| O      |      |    |     |     |        |        |        |      |      |
| HETATM | 4108 | H5 | PRP | 232 | 10.744 | 33.725 | 42.651 | 1.00 | 0.00 |
| H      |      |    |     |     |        |        |        |      |      |
| HETATM | 4109 | C3 | PRP | 232 | 8.244  | 33.040 | 44.287 | 1.00 | 0.00 |
| C      |      |    |     |     |        |        |        |      |      |
| HETATM | 4110 | H6 | PRP | 232 | 7.728  | 33.999 | 44.247 | 1.00 | 0.00 |
| H      |      |    |     |     |        |        |        |      |      |
| HETATM | 4111 | H7 | PRP | 232 | 7.619  | 32.147 | 44.280 | 1.00 | 0.00 |
| H      |      |    |     |     |        |        |        |      |      |
| HETATM | 4112 | H8 | PRP | 232 | 8.939  | 33.063 | 45.126 | 1.00 | 0.00 |
| H      |      |    |     |     |        |        |        |      |      |
| HETATM | 4113 | O1 | PRP | 233 | 7.924  | 34.776 | 39.082 | 1.00 | 0.00 |
| O      |      |    |     |     |        |        |        |      |      |
| HETATM | 4114 | H1 | PRP | 233 | 8.373  | 33.950 | 39.276 | 1.00 | 0.00 |
| H      |      |    |     |     |        |        |        |      |      |
| HETATM | 4115 | C1 | PRP | 233 | 8.685  | 35.687 | 39.825 | 1.00 | 0.00 |
| C      |      |    |     |     |        |        |        |      |      |

|        |      |    |     |     |        |        |        |      |      |
|--------|------|----|-----|-----|--------|--------|--------|------|------|
| HETATM | 4116 | H2 | PRP | 233 | 8.200  | 36.634 | 39.590 | 1.00 | 0.00 |
| H      |      |    |     |     |        |        |        |      |      |
| HETATM | 4117 | H3 | PRP | 233 | 8.624  | 35.441 | 40.886 | 1.00 | 0.00 |
| H      |      |    |     |     |        |        |        |      |      |
| HETATM | 4118 | C2 | PRP | 233 | 10.219 | 35.650 | 39.549 | 1.00 | 0.00 |
| C      |      |    |     |     |        |        |        |      |      |
| HETATM | 4119 | H4 | PRP | 233 | 10.346 | 35.629 | 38.467 | 1.00 | 0.00 |
| H      |      |    |     |     |        |        |        |      |      |
| HETATM | 4120 | O2 | PRP | 233 | 10.736 | 34.433 | 39.998 | 1.00 | 0.00 |
| O      |      |    |     |     |        |        |        |      |      |
| HETATM | 4121 | H5 | PRP | 233 | 11.650 | 34.573 | 40.255 | 1.00 | 0.00 |
| H      |      |    |     |     |        |        |        |      |      |
| HETATM | 4122 | C3 | PRP | 233 | 10.831 | 36.814 | 40.341 | 1.00 | 0.00 |
| C      |      |    |     |     |        |        |        |      |      |
| HETATM | 4123 | H6 | PRP | 233 | 10.393 | 36.741 | 41.336 | 1.00 | 0.00 |
| H      |      |    |     |     |        |        |        |      |      |
| HETATM | 4124 | H7 | PRP | 233 | 11.921 | 36.776 | 40.342 | 1.00 | 0.00 |
| H      |      |    |     |     |        |        |        |      |      |
| HETATM | 4125 | H8 | PRP | 233 | 10.524 | 37.746 | 39.866 | 1.00 | 0.00 |
| H      |      |    |     |     |        |        |        |      |      |
| HETATM | 4126 | O1 | PRP | 234 | 5.640  | 57.113 | 45.745 | 1.00 | 0.00 |
| O      |      |    |     |     |        |        |        |      |      |
| HETATM | 4127 | H1 | PRP | 234 | 6.118  | 56.890 | 44.943 | 1.00 | 0.00 |
| H      |      |    |     |     |        |        |        |      |      |
| HETATM | 4128 | C1 | PRP | 234 | 4.242  | 56.720 | 45.588 | 1.00 | 0.00 |
| C      |      |    |     |     |        |        |        |      |      |
| HETATM | 4129 | H2 | PRP | 234 | 3.808  | 57.490 | 44.951 | 1.00 | 0.00 |
| H      |      |    |     |     |        |        |        |      |      |
| HETATM | 4130 | H3 | PRP | 234 | 4.217  | 55.728 | 45.137 | 1.00 | 0.00 |
| H      |      |    |     |     |        |        |        |      |      |
| HETATM | 4131 | C2 | PRP | 234 | 3.436  | 56.732 | 46.897 | 1.00 | 0.00 |
| C      |      |    |     |     |        |        |        |      |      |
| HETATM | 4132 | H4 | PRP | 234 | 2.392  | 56.544 | 46.647 | 1.00 | 0.00 |
| H      |      |    |     |     |        |        |        |      |      |
| HETATM | 4133 | O2 | PRP | 234 | 3.578  | 58.057 | 47.543 | 1.00 | 0.00 |
| O      |      |    |     |     |        |        |        |      |      |
| HETATM | 4134 | H5 | PRP | 234 | 4.500  | 58.324 | 47.537 | 1.00 | 0.00 |
| H      |      |    |     |     |        |        |        |      |      |
| HETATM | 4135 | C3 | PRP | 234 | 3.826  | 55.527 | 47.723 | 1.00 | 0.00 |
| C      |      |    |     |     |        |        |        |      |      |
| HETATM | 4136 | H6 | PRP | 234 | 3.747  | 54.623 | 47.118 | 1.00 | 0.00 |
| H      |      |    |     |     |        |        |        |      |      |
| HETATM | 4137 | H7 | PRP | 234 | 4.881  | 55.699 | 47.937 | 1.00 | 0.00 |
| H      |      |    |     |     |        |        |        |      |      |
| HETATM | 4138 | H8 | PRP | 234 | 3.222  | 55.528 | 48.630 | 1.00 | 0.00 |
| H      |      |    |     |     |        |        |        |      |      |
| HETATM | 4139 | O1 | PRP | 235 | 24.587 | 34.365 | 52.412 | 1.00 | 0.00 |
| O      |      |    |     |     |        |        |        |      |      |
| HETATM | 4140 | H1 | PRP | 235 | 24.270 | 33.633 | 51.878 | 1.00 | 0.00 |
| H      |      |    |     |     |        |        |        |      |      |
| HETATM | 4141 | C1 | PRP | 235 | 23.572 | 35.426 | 52.458 | 1.00 | 0.00 |
| C      |      |    |     |     |        |        |        |      |      |
| HETATM | 4142 | H2 | PRP | 235 | 23.764 | 36.123 | 51.642 | 1.00 | 0.00 |
| H      |      |    |     |     |        |        |        |      |      |
| HETATM | 4143 | H3 | PRP | 235 | 22.552 | 35.042 | 52.463 | 1.00 | 0.00 |
| H      |      |    |     |     |        |        |        |      |      |

|        |      |    |     |     |        |        |        |      |      |
|--------|------|----|-----|-----|--------|--------|--------|------|------|
| HETATM | 4144 | C2 | PRP | 235 | 23.786 | 36.218 | 53.788 | 1.00 | 0.00 |
| C      |      |    |     |     |        |        |        |      |      |
| HETATM | 4145 | H4 | PRP | 235 | 24.777 | 36.673 | 53.783 | 1.00 | 0.00 |
| H      |      |    |     |     |        |        |        |      |      |
| HETATM | 4146 | O2 | PRP | 235 | 23.510 | 35.412 | 54.967 | 1.00 | 0.00 |
| O      |      |    |     |     |        |        |        |      |      |
| HETATM | 4147 | H5 | PRP | 235 | 24.172 | 34.718 | 54.992 | 1.00 | 0.00 |
| H      |      |    |     |     |        |        |        |      |      |
| HETATM | 4148 | C3 | PRP | 235 | 22.774 | 37.311 | 53.675 | 1.00 | 0.00 |
| C      |      |    |     |     |        |        |        |      |      |
| HETATM | 4149 | H6 | PRP | 235 | 22.840 | 38.089 | 54.435 | 1.00 | 0.00 |
| H      |      |    |     |     |        |        |        |      |      |
| HETATM | 4150 | H7 | PRP | 235 | 22.929 | 37.873 | 52.754 | 1.00 | 0.00 |
| H      |      |    |     |     |        |        |        |      |      |
| HETATM | 4151 | H8 | PRP | 235 | 21.802 | 36.818 | 53.658 | 1.00 | 0.00 |
| H      |      |    |     |     |        |        |        |      |      |
| HETATM | 4152 | O1 | PRP | 236 | 16.041 | 51.366 | 42.093 | 1.00 | 0.00 |
| O      |      |    |     |     |        |        |        |      |      |
| HETATM | 4153 | H1 | PRP | 236 | 15.845 | 50.480 | 41.781 | 1.00 | 0.00 |
| H      |      |    |     |     |        |        |        |      |      |
| HETATM | 4154 | C1 | PRP | 236 | 17.215 | 51.794 | 41.402 | 1.00 | 0.00 |
| C      |      |    |     |     |        |        |        |      |      |
| HETATM | 4155 | H2 | PRP | 236 | 18.038 | 51.500 | 42.053 | 1.00 | 0.00 |
| H      |      |    |     |     |        |        |        |      |      |
| HETATM | 4156 | H3 | PRP | 236 | 17.182 | 51.304 | 40.429 | 1.00 | 0.00 |
| H      |      |    |     |     |        |        |        |      |      |
| HETATM | 4157 | C2 | PRP | 236 | 17.217 | 53.287 | 41.170 | 1.00 | 0.00 |
| C      |      |    |     |     |        |        |        |      |      |
| HETATM | 4158 | H4 | PRP | 236 | 17.231 | 53.818 | 42.122 | 1.00 | 0.00 |
| H      |      |    |     |     |        |        |        |      |      |
| HETATM | 4159 | O2 | PRP | 236 | 16.047 | 53.772 | 40.516 | 1.00 | 0.00 |
| O      |      |    |     |     |        |        |        |      |      |
| HETATM | 4160 | H5 | PRP | 236 | 15.479 | 54.141 | 41.195 | 1.00 | 0.00 |
| H      |      |    |     |     |        |        |        |      |      |
| HETATM | 4161 | C3 | PRP | 236 | 18.489 | 53.753 | 40.387 | 1.00 | 0.00 |
| C      |      |    |     |     |        |        |        |      |      |
| HETATM | 4162 | H6 | PRP | 236 | 19.303 | 53.061 | 40.604 | 1.00 | 0.00 |
| H      |      |    |     |     |        |        |        |      |      |
| HETATM | 4163 | H7 | PRP | 236 | 18.256 | 53.651 | 39.327 | 1.00 | 0.00 |
| H      |      |    |     |     |        |        |        |      |      |
| HETATM | 4164 | H8 | PRP | 236 | 18.926 | 54.711 | 40.671 | 1.00 | 0.00 |
| H      |      |    |     |     |        |        |        |      |      |
| HETATM | 4165 | O1 | PRP | 237 | -2.608 | 26.620 | 30.765 | 1.00 | 0.00 |
| O      |      |    |     |     |        |        |        |      |      |
| HETATM | 4166 | H1 | PRP | 237 | -2.135 | 26.704 | 29.934 | 1.00 | 0.00 |
| H      |      |    |     |     |        |        |        |      |      |
| HETATM | 4167 | C1 | PRP | 237 | -3.896 | 26.292 | 30.517 | 1.00 | 0.00 |
| C      |      |    |     |     |        |        |        |      |      |
| HETATM | 4168 | H2 | PRP | 237 | -4.348 | 26.916 | 29.746 | 1.00 | 0.00 |
| H      |      |    |     |     |        |        |        |      |      |
| HETATM | 4169 | H3 | PRP | 237 | -3.812 | 25.248 | 30.215 | 1.00 | 0.00 |
| H      |      |    |     |     |        |        |        |      |      |
| HETATM | 4170 | C2 | PRP | 237 | -4.913 | 26.207 | 31.744 | 1.00 | 0.00 |
| C      |      |    |     |     |        |        |        |      |      |
| HETATM | 4171 | H4 | PRP | 237 | -4.980 | 27.172 | 32.245 | 1.00 | 0.00 |
| H      |      |    |     |     |        |        |        |      |      |



|        |      |    |     |     |        |        |        |      |      |
|--------|------|----|-----|-----|--------|--------|--------|------|------|
| HETATM | 4172 | O2 | PRP | 237 | -4.685 | 25.216 | 32.700 | 1.00 | 0.00 |
| O      |      |    |     |     |        |        |        |      |      |
| HETATM | 4173 | H5 | PRP | 237 | -3.987 | 25.545 | 33.270 | 1.00 | 0.00 |
| H      |      |    |     |     |        |        |        |      |      |
| HETATM | 4174 | C3 | PRP | 237 | -6.290 | 25.746 | 31.185 | 1.00 | 0.00 |
| C      |      |    |     |     |        |        |        |      |      |
| HETATM | 4175 | H6 | PRP | 237 | -6.832 | 26.535 | 30.663 | 1.00 | 0.00 |
| H      |      |    |     |     |        |        |        |      |      |
| HETATM | 4176 | H7 | PRP | 237 | -6.108 | 24.953 | 30.459 | 1.00 | 0.00 |
| H      |      |    |     |     |        |        |        |      |      |
| HETATM | 4177 | H8 | PRP | 237 | -6.822 | 25.263 | 32.005 | 1.00 | 0.00 |
| H      |      |    |     |     |        |        |        |      |      |
| HETATM | 4178 | O1 | PRP | 238 | 0.536  | 26.742 | 53.157 | 1.00 | 0.00 |
| O      |      |    |     |     |        |        |        |      |      |
| HETATM | 4179 | H1 | PRP | 238 | 0.146  | 26.243 | 52.435 | 1.00 | 0.00 |
| H      |      |    |     |     |        |        |        |      |      |
| HETATM | 4180 | C1 | PRP | 238 | 1.899  | 27.063 | 52.942 | 1.00 | 0.00 |
| C      |      |    |     |     |        |        |        |      |      |
| HETATM | 4181 | H2 | PRP | 238 | 1.965  | 27.265 | 51.873 | 1.00 | 0.00 |
| H      |      |    |     |     |        |        |        |      |      |
| HETATM | 4182 | H3 | PRP | 238 | 2.193  | 28.020 | 53.372 | 1.00 | 0.00 |
| H      |      |    |     |     |        |        |        |      |      |
| HETATM | 4183 | C2 | PRP | 238 | 2.867  | 25.956 | 53.285 | 1.00 | 0.00 |
| C      |      |    |     |     |        |        |        |      |      |
| HETATM | 4184 | H4 | PRP | 238 | 3.876  | 26.363 | 53.227 | 1.00 | 0.00 |
| H      |      |    |     |     |        |        |        |      |      |
| HETATM | 4185 | O2 | PRP | 238 | 2.680  | 24.876 | 52.351 | 1.00 | 0.00 |
| O      |      |    |     |     |        |        |        |      |      |
| HETATM | 4186 | H5 | PRP | 238 | 3.062  | 24.043 | 52.634 | 1.00 | 0.00 |
| H      |      |    |     |     |        |        |        |      |      |
| HETATM | 4187 | C3 | PRP | 238 | 2.692  | 25.277 | 54.706 | 1.00 | 0.00 |
| C      |      |    |     |     |        |        |        |      |      |
| HETATM | 4188 | H6 | PRP | 238 | 3.330  | 24.397 | 54.784 | 1.00 | 0.00 |
| H      |      |    |     |     |        |        |        |      |      |
| HETATM | 4189 | H7 | PRP | 238 | 3.017  | 26.090 | 55.355 | 1.00 | 0.00 |
| H      |      |    |     |     |        |        |        |      |      |
| HETATM | 4190 | H8 | PRP | 238 | 1.641  | 25.020 | 54.832 | 1.00 | 0.00 |
| H      |      |    |     |     |        |        |        |      |      |
| HETATM | 4191 | O1 | PRP | 239 | 9.861  | 37.194 | 70.728 | 1.00 | 0.00 |
| O      |      |    |     |     |        |        |        |      |      |
| HETATM | 4192 | H1 | PRP | 239 | 9.008  | 37.150 | 70.290 | 1.00 | 0.00 |
| H      |      |    |     |     |        |        |        |      |      |
| HETATM | 4193 | C1 | PRP | 239 | 10.752 | 36.380 | 70.040 | 1.00 | 0.00 |
| C      |      |    |     |     |        |        |        |      |      |
| HETATM | 4194 | H2 | PRP | 239 | 10.590 | 36.621 | 68.989 | 1.00 | 0.00 |
| H      |      |    |     |     |        |        |        |      |      |
| HETATM | 4195 | H3 | PRP | 239 | 11.781 | 36.500 | 70.378 | 1.00 | 0.00 |
| H      |      |    |     |     |        |        |        |      |      |
| HETATM | 4196 | C2 | PRP | 239 | 10.171 | 34.936 | 70.256 | 1.00 | 0.00 |
| C      |      |    |     |     |        |        |        |      |      |
| HETATM | 4197 | H4 | PRP | 239 | 10.586 | 34.329 | 69.451 | 1.00 | 0.00 |
| H      |      |    |     |     |        |        |        |      |      |
| HETATM | 4198 | O2 | PRP | 239 | 8.760  | 34.855 | 70.052 | 1.00 | 0.00 |
| O      |      |    |     |     |        |        |        |      |      |
| HETATM | 4199 | H5 | PRP | 239 | 8.559  | 33.923 | 69.938 | 1.00 | 0.00 |
| H      |      |    |     |     |        |        |        |      |      |

|        |      |    |     |     |        |        |        |      |      |
|--------|------|----|-----|-----|--------|--------|--------|------|------|
| HETATM | 4200 | C3 | PRP | 239 | 10.661 | 34.484 | 71.652 | 1.00 | 0.00 |
| C      |      |    |     |     |        |        |        |      |      |
| HETATM | 4201 | H6 | PRP | 239 | 10.054 | 34.971 | 72.415 | 1.00 | 0.00 |
| H      |      |    |     |     |        |        |        |      |      |
| HETATM | 4202 | H7 | PRP | 239 | 10.593 | 33.397 | 71.684 | 1.00 | 0.00 |
| H      |      |    |     |     |        |        |        |      |      |
| HETATM | 4203 | H8 | PRP | 239 | 11.704 | 34.776 | 71.778 | 1.00 | 0.00 |
| H      |      |    |     |     |        |        |        |      |      |
| HETATM | 4204 | O1 | PRP | 240 | 9.080  | 36.210 | 44.875 | 1.00 | 0.00 |
| O      |      |    |     |     |        |        |        |      |      |
| HETATM | 4205 | H1 | PRP | 240 | 9.143  | 35.412 | 44.345 | 1.00 | 0.00 |
| H      |      |    |     |     |        |        |        |      |      |
| HETATM | 4206 | C1 | PRP | 240 | 9.845  | 37.264 | 44.174 | 1.00 | 0.00 |
| C      |      |    |     |     |        |        |        |      |      |
| HETATM | 4207 | H2 | PRP | 240 | 10.767 | 36.751 | 43.900 | 1.00 | 0.00 |
| H      |      |    |     |     |        |        |        |      |      |
| HETATM | 4208 | H3 | PRP | 240 | 9.289  | 37.541 | 43.278 | 1.00 | 0.00 |
| H      |      |    |     |     |        |        |        |      |      |
| HETATM | 4209 | C2 | PRP | 240 | 9.962  | 38.502 | 44.976 | 1.00 | 0.00 |
| C      |      |    |     |     |        |        |        |      |      |
| HETATM | 4210 | H4 | PRP | 240 | 10.117 | 38.300 | 46.036 | 1.00 | 0.00 |
| H      |      |    |     |     |        |        |        |      |      |
| HETATM | 4211 | O2 | PRP | 240 | 8.890  | 39.246 | 44.738 | 1.00 | 0.00 |
| O      |      |    |     |     |        |        |        |      |      |
| HETATM | 4212 | H5 | PRP | 240 | 8.235  | 38.737 | 45.221 | 1.00 | 0.00 |
| H      |      |    |     |     |        |        |        |      |      |
| HETATM | 4213 | C3 | PRP | 240 | 11.183 | 39.241 | 44.369 | 1.00 | 0.00 |
| C      |      |    |     |     |        |        |        |      |      |
| HETATM | 4214 | H6 | PRP | 240 | 10.956 | 39.505 | 43.336 | 1.00 | 0.00 |
| H      |      |    |     |     |        |        |        |      |      |
| HETATM | 4215 | H7 | PRP | 240 | 11.308 | 40.162 | 44.939 | 1.00 | 0.00 |
| H      |      |    |     |     |        |        |        |      |      |
| HETATM | 4216 | H8 | PRP | 240 | 12.068 | 38.621 | 44.509 | 1.00 | 0.00 |
| H      |      |    |     |     |        |        |        |      |      |
| HETATM | 4217 | O1 | PRP | 241 | 0.253  | 29.954 | 29.037 | 1.00 | 0.00 |
| O      |      |    |     |     |        |        |        |      |      |
| HETATM | 4218 | H1 | PRP | 241 | -0.351 | 30.622 | 29.371 | 1.00 | 0.00 |
| H      |      |    |     |     |        |        |        |      |      |
| HETATM | 4219 | C1 | PRP | 241 | 1.407  | 29.814 | 29.868 | 1.00 | 0.00 |
| C      |      |    |     |     |        |        |        |      |      |
| HETATM | 4220 | H2 | PRP | 241 | 1.323  | 29.256 | 30.801 | 1.00 | 0.00 |
| H      |      |    |     |     |        |        |        |      |      |
| HETATM | 4221 | H3 | PRP | 241 | 2.124  | 29.244 | 29.278 | 1.00 | 0.00 |
| H      |      |    |     |     |        |        |        |      |      |
| HETATM | 4222 | C2 | PRP | 241 | 1.854  | 31.215 | 30.272 | 1.00 | 0.00 |
| C      |      |    |     |     |        |        |        |      |      |
| HETATM | 4223 | H4 | PRP | 241 | 2.933  | 31.214 | 30.429 | 1.00 | 0.00 |
| H      |      |    |     |     |        |        |        |      |      |
| HETATM | 4224 | O2 | PRP | 241 | 1.145  | 31.558 | 31.463 | 1.00 | 0.00 |
| O      |      |    |     |     |        |        |        |      |      |
| HETATM | 4225 | H5 | PRP | 241 | 1.516  | 32.362 | 31.835 | 1.00 | 0.00 |
| H      |      |    |     |     |        |        |        |      |      |
| HETATM | 4226 | C3 | PRP | 241 | 1.513  | 32.219 | 29.245 | 1.00 | 0.00 |
| C      |      |    |     |     |        |        |        |      |      |
| HETATM | 4227 | H6 | PRP | 241 | 0.434  | 32.356 | 29.325 | 1.00 | 0.00 |
| H      |      |    |     |     |        |        |        |      |      |

|        |      |    |     |     |        |        |        |      |      |
|--------|------|----|-----|-----|--------|--------|--------|------|------|
| HETATM | 4228 | H7 | PRP | 241 | 2.053  | 33.147 | 29.433 | 1.00 | 0.00 |
| H      |      |    |     |     |        |        |        |      |      |
| HETATM | 4229 | H8 | PRP | 241 | 1.743  | 31.928 | 28.221 | 1.00 | 0.00 |
| H      |      |    |     |     |        |        |        |      |      |
| HETATM | 4230 | O1 | PRP | 242 | 16.007 | 44.708 | 46.315 | 1.00 | 0.00 |
| O      |      |    |     |     |        |        |        |      |      |
| HETATM | 4231 | H1 | PRP | 242 | 15.377 | 44.830 | 45.600 | 1.00 | 0.00 |
| H      |      |    |     |     |        |        |        |      |      |
| HETATM | 4232 | C1 | PRP | 242 | 15.252 | 44.380 | 47.462 | 1.00 | 0.00 |
| C      |      |    |     |     |        |        |        |      |      |
| HETATM | 4233 | H2 | PRP | 242 | 14.570 | 43.565 | 47.222 | 1.00 | 0.00 |
| H      |      |    |     |     |        |        |        |      |      |
| HETATM | 4234 | H3 | PRP | 242 | 15.877 | 43.929 | 48.232 | 1.00 | 0.00 |
| H      |      |    |     |     |        |        |        |      |      |
| HETATM | 4235 | C2 | PRP | 242 | 14.368 | 45.531 | 48.053 | 1.00 | 0.00 |
| C      |      |    |     |     |        |        |        |      |      |
| HETATM | 4236 | H4 | PRP | 242 | 13.904 | 45.238 | 48.995 | 1.00 | 0.00 |
| H      |      |    |     |     |        |        |        |      |      |
| HETATM | 4237 | O2 | PRP | 242 | 13.353 | 45.697 | 47.129 | 1.00 | 0.00 |
| O      |      |    |     |     |        |        |        |      |      |
| HETATM | 4238 | H5 | PRP | 242 | 12.625 | 46.165 | 47.545 | 1.00 | 0.00 |
| H      |      |    |     |     |        |        |        |      |      |
| HETATM | 4239 | C3 | PRP | 242 | 15.097 | 46.898 | 48.299 | 1.00 | 0.00 |
| C      |      |    |     |     |        |        |        |      |      |
| HETATM | 4240 | H6 | PRP | 242 | 14.389 | 47.570 | 48.784 | 1.00 | 0.00 |
| H      |      |    |     |     |        |        |        |      |      |
| HETATM | 4241 | H7 | PRP | 242 | 15.989 | 46.868 | 48.925 | 1.00 | 0.00 |
| H      |      |    |     |     |        |        |        |      |      |
| HETATM | 4242 | H8 | PRP | 242 | 15.468 | 47.212 | 47.324 | 1.00 | 0.00 |
| H      |      |    |     |     |        |        |        |      |      |
| HETATM | 4243 | O1 | PRP | 243 | 18.389 | 42.274 | 40.126 | 1.00 | 0.00 |
| O      |      |    |     |     |        |        |        |      |      |
| HETATM | 4244 | H1 | PRP | 243 | 19.113 | 42.538 | 39.553 | 1.00 | 0.00 |
| H      |      |    |     |     |        |        |        |      |      |
| HETATM | 4245 | C1 | PRP | 243 | 17.221 | 41.975 | 39.360 | 1.00 | 0.00 |
| C      |      |    |     |     |        |        |        |      |      |
| HETATM | 4246 | H2 | PRP | 243 | 17.409 | 41.601 | 38.353 | 1.00 | 0.00 |
| H      |      |    |     |     |        |        |        |      |      |
| HETATM | 4247 | H3 | PRP | 243 | 16.712 | 41.220 | 39.959 | 1.00 | 0.00 |
| H      |      |    |     |     |        |        |        |      |      |
| HETATM | 4248 | C2 | PRP | 243 | 16.315 | 43.229 | 39.282 | 1.00 | 0.00 |
| C      |      |    |     |     |        |        |        |      |      |
| HETATM | 4249 | H4 | PRP | 243 | 17.062 | 44.002 | 39.104 | 1.00 | 0.00 |
| H      |      |    |     |     |        |        |        |      |      |
| HETATM | 4250 | O2 | PRP | 243 | 15.649 | 43.411 | 40.473 | 1.00 | 0.00 |
| O      |      |    |     |     |        |        |        |      |      |
| HETATM | 4251 | H5 | PRP | 243 | 16.305 | 43.219 | 41.147 | 1.00 | 0.00 |
| H      |      |    |     |     |        |        |        |      |      |
| HETATM | 4252 | C3 | PRP | 243 | 15.310 | 43.294 | 38.133 | 1.00 | 0.00 |
| C      |      |    |     |     |        |        |        |      |      |
| HETATM | 4253 | H6 | PRP | 243 | 15.916 | 43.475 | 37.246 | 1.00 | 0.00 |
| H      |      |    |     |     |        |        |        |      |      |
| HETATM | 4254 | H7 | PRP | 243 | 14.648 | 42.437 | 38.010 | 1.00 | 0.00 |
| H      |      |    |     |     |        |        |        |      |      |
| HETATM | 4255 | H8 | PRP | 243 | 14.685 | 44.181 | 38.246 | 1.00 | 0.00 |
| H      |      |    |     |     |        |        |        |      |      |

|        |      |    |     |     |        |        |        |      |      |
|--------|------|----|-----|-----|--------|--------|--------|------|------|
| HETATM | 4256 | O1 | PRP | 244 | 8.558  | 26.411 | 34.160 | 1.00 | 0.00 |
| O      |      |    |     |     |        |        |        |      |      |
| HETATM | 4257 | H1 | PRP | 244 | 9.205  | 25.775 | 33.848 | 1.00 | 0.00 |
| H      |      |    |     |     |        |        |        |      |      |
| HETATM | 4258 | C1 | PRP | 244 | 7.525  | 25.670 | 34.630 | 1.00 | 0.00 |
| C      |      |    |     |     |        |        |        |      |      |
| HETATM | 4259 | H2 | PRP | 244 | 7.395  | 24.772 | 34.026 | 1.00 | 0.00 |
| H      |      |    |     |     |        |        |        |      |      |
| HETATM | 4260 | H3 | PRP | 244 | 7.662  | 25.264 | 35.632 | 1.00 | 0.00 |
| H      |      |    |     |     |        |        |        |      |      |
| HETATM | 4261 | C2 | PRP | 244 | 6.189  | 26.443 | 34.614 | 1.00 | 0.00 |
| C      |      |    |     |     |        |        |        |      |      |
| HETATM | 4262 | H4 | PRP | 244 | 5.994  | 27.052 | 33.731 | 1.00 | 0.00 |
| H      |      |    |     |     |        |        |        |      |      |
| HETATM | 4263 | O2 | PRP | 244 | 6.153  | 27.246 | 35.859 | 1.00 | 0.00 |
| O      |      |    |     |     |        |        |        |      |      |
| HETATM | 4264 | H5 | PRP | 244 | 6.360  | 28.165 | 35.674 | 1.00 | 0.00 |
| H      |      |    |     |     |        |        |        |      |      |
| HETATM | 4265 | C3 | PRP | 244 | 5.045  | 25.395 | 34.790 | 1.00 | 0.00 |
| C      |      |    |     |     |        |        |        |      |      |
| HETATM | 4266 | H6 | PRP | 244 | 4.157  | 26.024 | 34.729 | 1.00 | 0.00 |
| H      |      |    |     |     |        |        |        |      |      |
| HETATM | 4267 | H7 | PRP | 244 | 5.057  | 24.579 | 34.067 | 1.00 | 0.00 |
| H      |      |    |     |     |        |        |        |      |      |
| HETATM | 4268 | H8 | PRP | 244 | 4.983  | 24.904 | 35.761 | 1.00 | 0.00 |
| H      |      |    |     |     |        |        |        |      |      |
| HETATM | 4269 | O1 | PRP | 245 | 24.192 | 23.232 | 39.482 | 1.00 | 0.00 |
| O      |      |    |     |     |        |        |        |      |      |
| HETATM | 4270 | H1 | PRP | 245 | 23.797 | 23.749 | 40.189 | 1.00 | 0.00 |
| H      |      |    |     |     |        |        |        |      |      |
| HETATM | 4271 | C1 | PRP | 245 | 24.146 | 23.983 | 38.297 | 1.00 | 0.00 |
| C      |      |    |     |     |        |        |        |      |      |
| HETATM | 4272 | H2 | PRP | 245 | 24.852 | 24.803 | 38.434 | 1.00 | 0.00 |
| H      |      |    |     |     |        |        |        |      |      |
| HETATM | 4273 | H3 | PRP | 245 | 24.569 | 23.481 | 37.426 | 1.00 | 0.00 |
| H      |      |    |     |     |        |        |        |      |      |
| HETATM | 4274 | C2 | PRP | 245 | 22.728 | 24.536 | 38.033 | 1.00 | 0.00 |
| C      |      |    |     |     |        |        |        |      |      |
| HETATM | 4275 | H4 | PRP | 245 | 22.440 | 25.208 | 38.842 | 1.00 | 0.00 |
| H      |      |    |     |     |        |        |        |      |      |
| HETATM | 4276 | O2 | PRP | 245 | 21.808 | 23.454 | 37.853 | 1.00 | 0.00 |
| O      |      |    |     |     |        |        |        |      |      |
| HETATM | 4277 | H5 | PRP | 245 | 22.011 | 22.793 | 38.519 | 1.00 | 0.00 |
| H      |      |    |     |     |        |        |        |      |      |
| HETATM | 4278 | C3 | PRP | 245 | 22.785 | 25.331 | 36.766 | 1.00 | 0.00 |
| C      |      |    |     |     |        |        |        |      |      |
| HETATM | 4279 | H6 | PRP | 245 | 23.071 | 24.617 | 35.993 | 1.00 | 0.00 |
| H      |      |    |     |     |        |        |        |      |      |
| HETATM | 4280 | H7 | PRP | 245 | 21.819 | 25.769 | 36.514 | 1.00 | 0.00 |
| H      |      |    |     |     |        |        |        |      |      |
| HETATM | 4281 | H8 | PRP | 245 | 23.504 | 26.144 | 36.861 | 1.00 | 0.00 |
| H      |      |    |     |     |        |        |        |      |      |
| HETATM | 4282 | O1 | PRP | 246 | 29.718 | 33.448 | 37.168 | 1.00 | 0.00 |
| O      |      |    |     |     |        |        |        |      |      |
| HETATM | 4283 | H1 | PRP | 246 | 30.565 | 33.557 | 36.730 | 1.00 | 0.00 |
| H      |      |    |     |     |        |        |        |      |      |

|        |      |    |     |     |        |        |        |      |      |
|--------|------|----|-----|-----|--------|--------|--------|------|------|
| HETATM | 4284 | C1 | PRP | 246 | 29.876 | 34.029 | 38.469 | 1.00 | 0.00 |
| C      |      |    |     |     |        |        |        |      |      |
| HETATM | 4285 | H2 | PRP | 246 | 30.348 | 33.343 | 39.171 | 1.00 | 0.00 |
| H      |      |    |     |     |        |        |        |      |      |
| HETATM | 4286 | H3 | PRP | 246 | 30.560 | 34.868 | 38.337 | 1.00 | 0.00 |
| H      |      |    |     |     |        |        |        |      |      |
| HETATM | 4287 | C2 | PRP | 246 | 28.620 | 34.433 | 39.087 | 1.00 | 0.00 |
| C      |      |    |     |     |        |        |        |      |      |
| HETATM | 4288 | H4 | PRP | 246 | 27.973 | 33.571 | 38.922 | 1.00 | 0.00 |
| H      |      |    |     |     |        |        |        |      |      |
| HETATM | 4289 | O2 | PRP | 246 | 27.991 | 35.483 | 38.326 | 1.00 | 0.00 |
| O      |      |    |     |     |        |        |        |      |      |
| HETATM | 4290 | H5 | PRP | 246 | 28.139 | 35.301 | 37.395 | 1.00 | 0.00 |
| H      |      |    |     |     |        |        |        |      |      |
| HETATM | 4291 | C3 | PRP | 246 | 28.719 | 34.857 | 40.604 | 1.00 | 0.00 |
| C      |      |    |     |     |        |        |        |      |      |
| HETATM | 4292 | H6 | PRP | 246 | 28.815 | 33.951 | 41.204 | 1.00 | 0.00 |
| H      |      |    |     |     |        |        |        |      |      |
| HETATM | 4293 | H7 | PRP | 246 | 29.578 | 35.527 | 40.649 | 1.00 | 0.00 |
| H      |      |    |     |     |        |        |        |      |      |
| HETATM | 4294 | H8 | PRP | 246 | 27.803 | 35.371 | 40.895 | 1.00 | 0.00 |
| H      |      |    |     |     |        |        |        |      |      |
| HETATM | 4295 | O1 | PRP | 247 | 5.327  | 26.790 | 49.559 | 1.00 | 0.00 |
| O      |      |    |     |     |        |        |        |      |      |
| HETATM | 4296 | H1 | PRP | 247 | 5.089  | 26.249 | 48.802 | 1.00 | 0.00 |
| H      |      |    |     |     |        |        |        |      |      |
| HETATM | 4297 | C1 | PRP | 247 | 4.621  | 28.015 | 49.458 | 1.00 | 0.00 |
| C      |      |    |     |     |        |        |        |      |      |
| HETATM | 4298 | H2 | PRP | 247 | 4.897  | 28.529 | 48.537 | 1.00 | 0.00 |
| H      |      |    |     |     |        |        |        |      |      |
| HETATM | 4299 | H3 | PRP | 247 | 3.542  | 27.986 | 49.611 | 1.00 | 0.00 |
| H      |      |    |     |     |        |        |        |      |      |
| HETATM | 4300 | C2 | PRP | 247 | 5.190  | 28.928 | 50.499 | 1.00 | 0.00 |
| C      |      |    |     |     |        |        |        |      |      |
| HETATM | 4301 | H4 | PRP | 247 | 6.276  | 28.988 | 50.424 | 1.00 | 0.00 |
| H      |      |    |     |     |        |        |        |      |      |
| HETATM | 4302 | O2 | PRP | 247 | 4.861  | 28.489 | 51.854 | 1.00 | 0.00 |
| O      |      |    |     |     |        |        |        |      |      |
| HETATM | 4303 | H5 | PRP | 247 | 5.179  | 27.584 | 51.848 | 1.00 | 0.00 |
| H      |      |    |     |     |        |        |        |      |      |
| HETATM | 4304 | C3 | PRP | 247 | 4.552  | 30.390 | 50.434 | 1.00 | 0.00 |
| C      |      |    |     |     |        |        |        |      |      |
| HETATM | 4305 | H6 | PRP | 247 | 4.439  | 30.693 | 49.393 | 1.00 | 0.00 |
| H      |      |    |     |     |        |        |        |      |      |
| HETATM | 4306 | H7 | PRP | 247 | 3.639  | 30.516 | 51.015 | 1.00 | 0.00 |
| H      |      |    |     |     |        |        |        |      |      |
| HETATM | 4307 | H8 | PRP | 247 | 5.326  | 31.004 | 50.895 | 1.00 | 0.00 |
| H      |      |    |     |     |        |        |        |      |      |
| HETATM | 4308 | O1 | PRP | 248 | 18.821 | 39.735 | 42.476 | 1.00 | 0.00 |
| O      |      |    |     |     |        |        |        |      |      |
| HETATM | 4309 | H1 | PRP | 248 | 18.193 | 39.632 | 43.195 | 1.00 | 0.00 |
| H      |      |    |     |     |        |        |        |      |      |
| HETATM | 4310 | C1 | PRP | 248 | 19.314 | 38.475 | 42.054 | 1.00 | 0.00 |
| C      |      |    |     |     |        |        |        |      |      |
| HETATM | 4311 | H2 | PRP | 248 | 20.136 | 38.139 | 42.687 | 1.00 | 0.00 |
| H      |      |    |     |     |        |        |        |      |      |

|        |      |    |     |     |        |        |        |      |      |
|--------|------|----|-----|-----|--------|--------|--------|------|------|
| HETATM | 4312 | H3 | PRP | 248 | 18.589 | 37.672 | 41.920 | 1.00 | 0.00 |
| H      |      |    |     |     |        |        |        |      |      |
| HETATM | 4313 | C2 | PRP | 248 | 20.115 | 38.520 | 40.721 | 1.00 | 0.00 |
| C      |      |    |     |     |        |        |        |      |      |
| HETATM | 4314 | H4 | PRP | 248 | 20.927 | 39.242 | 40.807 | 1.00 | 0.00 |
| H      |      |    |     |     |        |        |        |      |      |
| HETATM | 4315 | O2 | PRP | 248 | 19.256 | 39.001 | 39.687 | 1.00 | 0.00 |
| O      |      |    |     |     |        |        |        |      |      |
| HETATM | 4316 | H5 | PRP | 248 | 19.082 | 39.943 | 39.625 | 1.00 | 0.00 |
| H      |      |    |     |     |        |        |        |      |      |
| HETATM | 4317 | C3 | PRP | 248 | 20.632 | 37.146 | 40.340 | 1.00 | 0.00 |
| C      |      |    |     |     |        |        |        |      |      |
| HETATM | 4318 | H6 | PRP | 248 | 20.975 | 37.179 | 39.306 | 1.00 | 0.00 |
| H      |      |    |     |     |        |        |        |      |      |
| HETATM | 4319 | H7 | PRP | 248 | 21.411 | 36.745 | 40.989 | 1.00 | 0.00 |
| H      |      |    |     |     |        |        |        |      |      |
| HETATM | 4320 | H8 | PRP | 248 | 19.840 | 36.403 | 40.430 | 1.00 | 0.00 |
| H      |      |    |     |     |        |        |        |      |      |
| HETATM | 4321 | O1 | PRP | 249 | 17.520 | 37.731 | 32.579 | 1.00 | 0.00 |
| O      |      |    |     |     |        |        |        |      |      |
| HETATM | 4322 | H1 | PRP | 249 | 17.128 | 36.979 | 32.129 | 1.00 | 0.00 |
| H      |      |    |     |     |        |        |        |      |      |
| HETATM | 4323 | C1 | PRP | 249 | 16.765 | 38.101 | 33.709 | 1.00 | 0.00 |
| C      |      |    |     |     |        |        |        |      |      |
| HETATM | 4324 | H2 | PRP | 249 | 15.739 | 38.191 | 33.351 | 1.00 | 0.00 |
| H      |      |    |     |     |        |        |        |      |      |
| HETATM | 4325 | H3 | PRP | 249 | 16.757 | 37.333 | 34.482 | 1.00 | 0.00 |
| H      |      |    |     |     |        |        |        |      |      |
| HETATM | 4326 | C2 | PRP | 249 | 17.280 | 39.433 | 34.332 | 1.00 | 0.00 |
| C      |      |    |     |     |        |        |        |      |      |
| HETATM | 4327 | H4 | PRP | 249 | 17.383 | 40.066 | 33.450 | 1.00 | 0.00 |
| H      |      |    |     |     |        |        |        |      |      |
| HETATM | 4328 | O2 | PRP | 249 | 18.551 | 39.383 | 34.928 | 1.00 | 0.00 |
| O      |      |    |     |     |        |        |        |      |      |
| HETATM | 4329 | H5 | PRP | 249 | 19.276 | 39.511 | 34.313 | 1.00 | 0.00 |
| H      |      |    |     |     |        |        |        |      |      |
| HETATM | 4330 | C3 | PRP | 249 | 16.348 | 40.060 | 35.326 | 1.00 | 0.00 |
| C      |      |    |     |     |        |        |        |      |      |
| HETATM | 4331 | H6 | PRP | 249 | 16.516 | 41.128 | 35.463 | 1.00 | 0.00 |
| H      |      |    |     |     |        |        |        |      |      |
| HETATM | 4332 | H7 | PRP | 249 | 15.322 | 40.130 | 34.964 | 1.00 | 0.00 |
| H      |      |    |     |     |        |        |        |      |      |
| HETATM | 4333 | H8 | PRP | 249 | 16.272 | 39.356 | 36.155 | 1.00 | 0.00 |
| H      |      |    |     |     |        |        |        |      |      |
| HETATM | 4334 | O1 | PRP | 250 | 26.553 | 43.143 | 50.833 | 1.00 | 0.00 |
| O      |      |    |     |     |        |        |        |      |      |
| HETATM | 4335 | H1 | PRP | 250 | 26.684 | 43.549 | 51.694 | 1.00 | 0.00 |
| H      |      |    |     |     |        |        |        |      |      |
| HETATM | 4336 | C1 | PRP | 250 | 25.923 | 44.044 | 49.952 | 1.00 | 0.00 |
| C      |      |    |     |     |        |        |        |      |      |
| HETATM | 4337 | H2 | PRP | 250 | 26.688 | 44.684 | 49.513 | 1.00 | 0.00 |
| H      |      |    |     |     |        |        |        |      |      |
| HETATM | 4338 | H3 | PRP | 250 | 25.376 | 43.472 | 49.202 | 1.00 | 0.00 |
| H      |      |    |     |     |        |        |        |      |      |
| HETATM | 4339 | C2 | PRP | 250 | 25.210 | 45.085 | 50.838 | 1.00 | 0.00 |
| C      |      |    |     |     |        |        |        |      |      |

|        |      |    |     |     |        |        |        |      |      |
|--------|------|----|-----|-----|--------|--------|--------|------|------|
| HETATM | 4340 | H4 | PRP | 250 | 25.795 | 45.326 | 51.726 | 1.00 | 0.00 |
| H      |      |    |     |     |        |        |        |      |      |
| HETATM | 4341 | O2 | PRP | 250 | 23.964 | 44.604 | 51.144 | 1.00 | 0.00 |
| O      |      |    |     |     |        |        |        |      |      |
| HETATM | 4342 | H5 | PRP | 250 | 24.099 | 43.724 | 51.503 | 1.00 | 0.00 |
| H      |      |    |     |     |        |        |        |      |      |
| HETATM | 4343 | C3 | PRP | 250 | 24.916 | 46.395 | 50.049 | 1.00 | 0.00 |
| C      |      |    |     |     |        |        |        |      |      |
| HETATM | 4344 | H6 | PRP | 250 | 24.327 | 47.031 | 50.710 | 1.00 | 0.00 |
| H      |      |    |     |     |        |        |        |      |      |
| HETATM | 4345 | H7 | PRP | 250 | 25.912 | 46.779 | 49.832 | 1.00 | 0.00 |
| H      |      |    |     |     |        |        |        |      |      |
| HETATM | 4346 | H8 | PRP | 250 | 24.418 | 46.213 | 49.096 | 1.00 | 0.00 |
| H      |      |    |     |     |        |        |        |      |      |
| HETATM | 4347 | O1 | PRP | 251 | 7.486  | 38.673 | 70.995 | 1.00 | 0.00 |
| O      |      |    |     |     |        |        |        |      |      |
| HETATM | 4348 | H1 | PRP | 251 | 6.771  | 38.094 | 70.720 | 1.00 | 0.00 |
| H      |      |    |     |     |        |        |        |      |      |
| HETATM | 4349 | C1 | PRP | 251 | 7.248  | 39.979 | 70.647 | 1.00 | 0.00 |
| C      |      |    |     |     |        |        |        |      |      |
| HETATM | 4350 | H2 | PRP | 251 | 7.007  | 40.074 | 69.588 | 1.00 | 0.00 |
| H      |      |    |     |     |        |        |        |      |      |
| HETATM | 4351 | H3 | PRP | 251 | 6.471  | 40.443 | 71.255 | 1.00 | 0.00 |
| H      |      |    |     |     |        |        |        |      |      |
| HETATM | 4352 | C2 | PRP | 251 | 8.601  | 40.737 | 70.797 | 1.00 | 0.00 |
| C      |      |    |     |     |        |        |        |      |      |
| HETATM | 4353 | H4 | PRP | 251 | 9.450  | 40.129 | 70.483 | 1.00 | 0.00 |
| H      |      |    |     |     |        |        |        |      |      |
| HETATM | 4354 | O2 | PRP | 251 | 8.840  | 40.898 | 72.144 | 1.00 | 0.00 |
| O      |      |    |     |     |        |        |        |      |      |
| HETATM | 4355 | H5 | PRP | 251 | 9.028  | 39.995 | 72.408 | 1.00 | 0.00 |
| H      |      |    |     |     |        |        |        |      |      |
| HETATM | 4356 | C3 | PRP | 251 | 8.471  | 42.014 | 69.953 | 1.00 | 0.00 |
| C      |      |    |     |     |        |        |        |      |      |
| HETATM | 4357 | H6 | PRP | 251 | 9.224  | 42.723 | 70.299 | 1.00 | 0.00 |
| H      |      |    |     |     |        |        |        |      |      |
| HETATM | 4358 | H7 | PRP | 251 | 8.737  | 41.682 | 68.950 | 1.00 | 0.00 |
| H      |      |    |     |     |        |        |        |      |      |
| HETATM | 4359 | H8 | PRP | 251 | 7.518  | 42.525 | 70.087 | 1.00 | 0.00 |
| H      |      |    |     |     |        |        |        |      |      |
| HETATM | 4360 | O1 | PRP | 252 | -4.916 | 22.813 | 45.851 | 1.00 | 0.00 |
| O      |      |    |     |     |        |        |        |      |      |
| HETATM | 4361 | H1 | PRP | 252 | -5.492 | 22.927 | 46.610 | 1.00 | 0.00 |
| H      |      |    |     |     |        |        |        |      |      |
| HETATM | 4362 | C1 | PRP | 252 | -5.851 | 22.850 | 44.875 | 1.00 | 0.00 |
| C      |      |    |     |     |        |        |        |      |      |
| HETATM | 4363 | H2 | PRP | 252 | -6.554 | 22.024 | 44.980 | 1.00 | 0.00 |
| H      |      |    |     |     |        |        |        |      |      |
| HETATM | 4364 | H3 | PRP | 252 | -6.414 | 23.779 | 44.971 | 1.00 | 0.00 |
| H      |      |    |     |     |        |        |        |      |      |
| HETATM | 4365 | C2 | PRP | 252 | -5.344 | 22.637 | 43.437 | 1.00 | 0.00 |
| C      |      |    |     |     |        |        |        |      |      |
| HETATM | 4366 | H4 | PRP | 252 | -4.706 | 21.753 | 43.449 | 1.00 | 0.00 |
| H      |      |    |     |     |        |        |        |      |      |
| HETATM | 4367 | O2 | PRP | 252 | -4.645 | 23.755 | 42.959 | 1.00 | 0.00 |
| O      |      |    |     |     |        |        |        |      |      |

|        |      |    |     |     |        |        |        |      |      |
|--------|------|----|-----|-----|--------|--------|--------|------|------|
| HETATM | 4368 | H5 | PRP | 252 | -3.931 | 23.827 | 43.596 | 1.00 | 0.00 |
| H      |      |    |     |     |        |        |        |      |      |
| HETATM | 4369 | C3 | PRP | 252 | -6.423 | 22.430 | 42.503 | 1.00 | 0.00 |
| C      |      |    |     |     |        |        |        |      |      |
| HETATM | 4370 | H6 | PRP | 252 | -6.033 | 22.032 | 41.566 | 1.00 | 0.00 |
| H      |      |    |     |     |        |        |        |      |      |
| HETATM | 4371 | H7 | PRP | 252 | -7.210 | 21.747 | 42.824 | 1.00 | 0.00 |
| H      |      |    |     |     |        |        |        |      |      |
| HETATM | 4372 | H8 | PRP | 252 | -6.824 | 23.420 | 42.284 | 1.00 | 0.00 |
| H      |      |    |     |     |        |        |        |      |      |
| HETATM | 4373 | O1 | PRP | 253 | -4.406 | 37.142 | 45.045 | 1.00 | 0.00 |
| O      |      |    |     |     |        |        |        |      |      |
| HETATM | 4374 | H1 | PRP | 253 | -3.617 | 36.596 | 45.068 | 1.00 | 0.00 |
| H      |      |    |     |     |        |        |        |      |      |
| HETATM | 4375 | C1 | PRP | 253 | -5.211 | 36.751 | 46.130 | 1.00 | 0.00 |
| C      |      |    |     |     |        |        |        |      |      |
| HETATM | 4376 | H2 | PRP | 253 | -4.739 | 36.791 | 47.112 | 1.00 | 0.00 |
| H      |      |    |     |     |        |        |        |      |      |
| HETATM | 4377 | H3 | PRP | 253 | -6.102 | 37.378 | 46.101 | 1.00 | 0.00 |
| H      |      |    |     |     |        |        |        |      |      |
| HETATM | 4378 | C2 | PRP | 253 | -5.587 | 35.268 | 45.792 | 1.00 | 0.00 |
| C      |      |    |     |     |        |        |        |      |      |
| HETATM | 4379 | H4 | PRP | 253 | -4.695 | 34.649 | 45.703 | 1.00 | 0.00 |
| H      |      |    |     |     |        |        |        |      |      |
| HETATM | 4380 | O2 | PRP | 253 | -6.191 | 35.381 | 44.477 | 1.00 | 0.00 |
| O      |      |    |     |     |        |        |        |      |      |
| HETATM | 4381 | H5 | PRP | 253 | -5.751 | 36.087 | 43.997 | 1.00 | 0.00 |
| H      |      |    |     |     |        |        |        |      |      |
| HETATM | 4382 | C3 | PRP | 253 | -6.693 | 34.735 | 46.698 | 1.00 | 0.00 |
| C      |      |    |     |     |        |        |        |      |      |
| HETATM | 4383 | H6 | PRP | 253 | -7.564 | 35.380 | 46.588 | 1.00 | 0.00 |
| H      |      |    |     |     |        |        |        |      |      |
| HETATM | 4384 | H7 | PRP | 253 | -6.881 | 33.682 | 46.488 | 1.00 | 0.00 |
| H      |      |    |     |     |        |        |        |      |      |
| HETATM | 4385 | H8 | PRP | 253 | -6.439 | 34.730 | 47.758 | 1.00 | 0.00 |
| H      |      |    |     |     |        |        |        |      |      |
| HETATM | 4386 | O1 | PRP | 254 | 11.138 | 50.986 | 43.429 | 1.00 | 0.00 |
| O      |      |    |     |     |        |        |        |      |      |
| HETATM | 4387 | H1 | PRP | 254 | 11.097 | 51.022 | 42.470 | 1.00 | 0.00 |
| H      |      |    |     |     |        |        |        |      |      |
| HETATM | 4388 | C1 | PRP | 254 | 10.004 | 51.626 | 44.048 | 1.00 | 0.00 |
| C      |      |    |     |     |        |        |        |      |      |
| HETATM | 4389 | H2 | PRP | 254 | 10.263 | 51.861 | 45.080 | 1.00 | 0.00 |
| H      |      |    |     |     |        |        |        |      |      |
| HETATM | 4390 | H3 | PRP | 254 | 9.757  | 52.548 | 43.523 | 1.00 | 0.00 |
| H      |      |    |     |     |        |        |        |      |      |
| HETATM | 4391 | C2 | PRP | 254 | 8.759  | 50.800 | 44.156 | 1.00 | 0.00 |
| C      |      |    |     |     |        |        |        |      |      |
| HETATM | 4392 | H4 | PRP | 254 | 7.933  | 51.374 | 44.575 | 1.00 | 0.00 |
| H      |      |    |     |     |        |        |        |      |      |
| HETATM | 4393 | O2 | PRP | 254 | 8.952  | 49.703 | 44.926 | 1.00 | 0.00 |
| O      |      |    |     |     |        |        |        |      |      |
| HETATM | 4394 | H5 | PRP | 254 | 9.825  | 49.387 | 44.682 | 1.00 | 0.00 |
| H      |      |    |     |     |        |        |        |      |      |
| HETATM | 4395 | C3 | PRP | 254 | 8.234  | 50.458 | 42.748 | 1.00 | 0.00 |
| C      |      |    |     |     |        |        |        |      |      |



|        |      |    |     |     |        |        |        |      |      |
|--------|------|----|-----|-----|--------|--------|--------|------|------|
| HETATM | 4396 | H6 | PRP | 254 | 8.156  | 51.375 | 42.164 | 1.00 | 0.00 |
| H      |      |    |     |     |        |        |        |      |      |
| HETATM | 4397 | H7 | PRP | 254 | 8.995  | 49.803 | 42.323 | 1.00 | 0.00 |
| H      |      |    |     |     |        |        |        |      |      |
| HETATM | 4398 | H8 | PRP | 254 | 7.250  | 49.990 | 42.753 | 1.00 | 0.00 |
| H      |      |    |     |     |        |        |        |      |      |
| HETATM | 4399 | O1 | PRP | 255 | 23.143 | 57.358 | 42.663 | 1.00 | 0.00 |
| O      |      |    |     |     |        |        |        |      |      |
| HETATM | 4400 | H1 | PRP | 255 | 22.659 | 56.573 | 42.928 | 1.00 | 0.00 |
| H      |      |    |     |     |        |        |        |      |      |
| HETATM | 4401 | C1 | PRP | 255 | 23.454 | 57.099 | 41.298 | 1.00 | 0.00 |
| C      |      |    |     |     |        |        |        |      |      |
| HETATM | 4402 | H2 | PRP | 255 | 22.802 | 57.724 | 40.687 | 1.00 | 0.00 |
| H      |      |    |     |     |        |        |        |      |      |
| HETATM | 4403 | H3 | PRP | 255 | 24.487 | 57.392 | 41.107 | 1.00 | 0.00 |
| H      |      |    |     |     |        |        |        |      |      |
| HETATM | 4404 | C2 | PRP | 255 | 23.147 | 55.647 | 40.904 | 1.00 | 0.00 |
| C      |      |    |     |     |        |        |        |      |      |
| HETATM | 4405 | H4 | PRP | 255 | 23.155 | 55.577 | 39.817 | 1.00 | 0.00 |
| H      |      |    |     |     |        |        |        |      |      |
| HETATM | 4406 | O2 | PRP | 255 | 21.863 | 55.314 | 41.240 | 1.00 | 0.00 |
| O      |      |    |     |     |        |        |        |      |      |
| HETATM | 4407 | H5 | PRP | 255 | 21.928 | 54.697 | 41.972 | 1.00 | 0.00 |
| H      |      |    |     |     |        |        |        |      |      |
| HETATM | 4408 | C3 | PRP | 255 | 24.119 | 54.677 | 41.466 | 1.00 | 0.00 |
| C      |      |    |     |     |        |        |        |      |      |
| HETATM | 4409 | H6 | PRP | 255 | 25.135 | 54.757 | 41.078 | 1.00 | 0.00 |
| H      |      |    |     |     |        |        |        |      |      |
| HETATM | 4410 | H7 | PRP | 255 | 23.970 | 54.572 | 42.540 | 1.00 | 0.00 |
| H      |      |    |     |     |        |        |        |      |      |
| HETATM | 4411 | H8 | PRP | 255 | 23.768 | 53.696 | 41.144 | 1.00 | 0.00 |
| H      |      |    |     |     |        |        |        |      |      |
| HETATM | 4412 | O1 | PRP | 256 | 22.407 | 39.400 | 45.555 | 1.00 | 0.00 |
| O      |      |    |     |     |        |        |        |      |      |
| HETATM | 4413 | H1 | PRP | 256 | 22.834 | 39.524 | 46.405 | 1.00 | 0.00 |
| H      |      |    |     |     |        |        |        |      |      |
| HETATM | 4414 | C1 | PRP | 256 | 22.951 | 40.453 | 44.695 | 1.00 | 0.00 |
| C      |      |    |     |     |        |        |        |      |      |
| HETATM | 4415 | H2 | PRP | 256 | 22.810 | 41.402 | 45.212 | 1.00 | 0.00 |
| H      |      |    |     |     |        |        |        |      |      |
| HETATM | 4416 | H3 | PRP | 256 | 24.024 | 40.264 | 44.717 | 1.00 | 0.00 |
| H      |      |    |     |     |        |        |        |      |      |
| HETATM | 4417 | C2 | PRP | 256 | 22.594 | 40.467 | 43.200 | 1.00 | 0.00 |
| C      |      |    |     |     |        |        |        |      |      |
| HETATM | 4418 | H4 | PRP | 256 | 21.520 | 40.511 | 43.021 | 1.00 | 0.00 |
| H      |      |    |     |     |        |        |        |      |      |
| HETATM | 4419 | O2 | PRP | 256 | 23.161 | 39.341 | 42.595 | 1.00 | 0.00 |
| O      |      |    |     |     |        |        |        |      |      |
| HETATM | 4420 | H5 | PRP | 256 | 22.843 | 38.564 | 43.061 | 1.00 | 0.00 |
| H      |      |    |     |     |        |        |        |      |      |
| HETATM | 4421 | C3 | PRP | 256 | 23.239 | 41.665 | 42.524 | 1.00 | 0.00 |
| C      |      |    |     |     |        |        |        |      |      |
| HETATM | 4422 | H6 | PRP | 256 | 24.323 | 41.718 | 42.624 | 1.00 | 0.00 |
| H      |      |    |     |     |        |        |        |      |      |
| HETATM | 4423 | H7 | PRP | 256 | 22.858 | 41.689 | 41.503 | 1.00 | 0.00 |
| H      |      |    |     |     |        |        |        |      |      |

|        |      |    |     |     |        |        |        |      |      |
|--------|------|----|-----|-----|--------|--------|--------|------|------|
| HETATM | 4424 | H8 | PRP | 256 | 22.814 | 42.558 | 42.983 | 1.00 | 0.00 |
| H      |      |    |     |     |        |        |        |      |      |
| HETATM | 4425 | O1 | PRP | 257 | -0.499 | 25.082 | 51.012 | 1.00 | 0.00 |
| O      |      |    |     |     |        |        |        |      |      |
| HETATM | 4426 | H1 | PRP | 257 | -0.824 | 25.564 | 50.248 | 1.00 | 0.00 |
| H      |      |    |     |     |        |        |        |      |      |
| HETATM | 4427 | C1 | PRP | 257 | -1.235 | 23.805 | 51.077 | 1.00 | 0.00 |
| C      |      |    |     |     |        |        |        |      |      |
| HETATM | 4428 | H2 | PRP | 257 | -2.273 | 23.971 | 51.367 | 1.00 | 0.00 |
| H      |      |    |     |     |        |        |        |      |      |
| HETATM | 4429 | H3 | PRP | 257 | -1.068 | 23.345 | 50.104 | 1.00 | 0.00 |
| H      |      |    |     |     |        |        |        |      |      |
| HETATM | 4430 | C2 | PRP | 257 | -0.608 | 23.033 | 52.294 | 1.00 | 0.00 |
| C      |      |    |     |     |        |        |        |      |      |
| HETATM | 4431 | H4 | PRP | 257 | -0.863 | 23.550 | 53.219 | 1.00 | 0.00 |
| H      |      |    |     |     |        |        |        |      |      |
| HETATM | 4432 | O2 | PRP | 257 | 0.756  | 22.981 | 52.256 | 1.00 | 0.00 |
| O      |      |    |     |     |        |        |        |      |      |
| HETATM | 4433 | H5 | PRP | 257 | 1.053  | 23.888 | 52.152 | 1.00 | 0.00 |
| H      |      |    |     |     |        |        |        |      |      |
| HETATM | 4434 | C3 | PRP | 257 | -1.190 | 21.661 | 52.219 | 1.00 | 0.00 |
| C      |      |    |     |     |        |        |        |      |      |
| HETATM | 4435 | H6 | PRP | 257 | -2.279 | 21.670 | 52.257 | 1.00 | 0.00 |
| H      |      |    |     |     |        |        |        |      |      |
| HETATM | 4436 | H7 | PRP | 257 | -0.891 | 21.180 | 51.287 | 1.00 | 0.00 |
| H      |      |    |     |     |        |        |        |      |      |
| HETATM | 4437 | H8 | PRP | 257 | -0.960 | 21.080 | 53.112 | 1.00 | 0.00 |
| H      |      |    |     |     |        |        |        |      |      |
| HETATM | 4438 | O1 | PRP | 258 | 1.162  | 26.330 | 38.094 | 1.00 | 0.00 |
| O      |      |    |     |     |        |        |        |      |      |
| HETATM | 4439 | H1 | PRP | 258 | 0.543  | 26.567 | 37.399 | 1.00 | 0.00 |
| H      |      |    |     |     |        |        |        |      |      |
| HETATM | 4440 | C1 | PRP | 258 | 2.396  | 26.659 | 37.618 | 1.00 | 0.00 |
| C      |      |    |     |     |        |        |        |      |      |
| HETATM | 4441 | H2 | PRP | 258 | 3.039  | 25.798 | 37.802 | 1.00 | 0.00 |
| H      |      |    |     |     |        |        |        |      |      |
| HETATM | 4442 | H3 | PRP | 258 | 2.439  | 26.746 | 36.533 | 1.00 | 0.00 |
| H      |      |    |     |     |        |        |        |      |      |
| HETATM | 4443 | C2 | PRP | 258 | 2.878  | 27.926 | 38.355 | 1.00 | 0.00 |
| C      |      |    |     |     |        |        |        |      |      |
| HETATM | 4444 | H4 | PRP | 258 | 3.866  | 28.225 | 38.003 | 1.00 | 0.00 |
| H      |      |    |     |     |        |        |        |      |      |
| HETATM | 4445 | O2 | PRP | 258 | 3.042  | 27.632 | 39.720 | 1.00 | 0.00 |
| O      |      |    |     |     |        |        |        |      |      |
| HETATM | 4446 | H5 | PRP | 258 | 2.237  | 27.186 | 39.992 | 1.00 | 0.00 |
| H      |      |    |     |     |        |        |        |      |      |
| HETATM | 4447 | C3 | PRP | 258 | 1.899  | 29.092 | 38.253 | 1.00 | 0.00 |
| C      |      |    |     |     |        |        |        |      |      |
| HETATM | 4448 | H6 | PRP | 258 | 1.836  | 29.285 | 37.182 | 1.00 | 0.00 |
| H      |      |    |     |     |        |        |        |      |      |
| HETATM | 4449 | H7 | PRP | 258 | 0.884  | 28.851 | 38.570 | 1.00 | 0.00 |
| H      |      |    |     |     |        |        |        |      |      |
| HETATM | 4450 | H8 | PRP | 258 | 2.292  | 29.987 | 38.736 | 1.00 | 0.00 |
| H      |      |    |     |     |        |        |        |      |      |
| HETATM | 4451 | O1 | PRP | 259 | -3.148 | 32.018 | 46.483 | 1.00 | 0.00 |
| O      |      |    |     |     |        |        |        |      |      |

|        |      |    |     |     |        |        |        |      |      |
|--------|------|----|-----|-----|--------|--------|--------|------|------|
| HETATM | 4452 | H1 | PRP | 259 | -2.273 | 31.940 | 46.872 | 1.00 | 0.00 |
| H      |      |    |     |     |        |        |        |      |      |
| HETATM | 4453 | C1 | PRP | 259 | -3.926 | 32.750 | 47.492 | 1.00 | 0.00 |
| C      |      |    |     |     |        |        |        |      |      |
| HETATM | 4454 | H2 | PRP | 259 | -3.600 | 33.787 | 47.572 | 1.00 | 0.00 |
| H      |      |    |     |     |        |        |        |      |      |
| HETATM | 4455 | H3 | PRP | 259 | -4.975 | 32.727 | 47.197 | 1.00 | 0.00 |
| H      |      |    |     |     |        |        |        |      |      |
| HETATM | 4456 | C2 | PRP | 259 | -3.702 | 32.134 | 48.912 | 1.00 | 0.00 |
| C      |      |    |     |     |        |        |        |      |      |
| HETATM | 4457 | H4 | PRP | 259 | -2.736 | 32.438 | 49.314 | 1.00 | 0.00 |
| H      |      |    |     |     |        |        |        |      |      |
| HETATM | 4458 | O2 | PRP | 259 | -3.928 | 30.782 | 48.924 | 1.00 | 0.00 |
| O      |      |    |     |     |        |        |        |      |      |
| HETATM | 4459 | H5 | PRP | 259 | -4.725 | 30.594 | 48.422 | 1.00 | 0.00 |
| H      |      |    |     |     |        |        |        |      |      |
| HETATM | 4460 | C3 | PRP | 259 | -4.707 | 32.701 | 49.871 | 1.00 | 0.00 |
| C      |      |    |     |     |        |        |        |      |      |
| HETATM | 4461 | H6 | PRP | 259 | -4.615 | 33.786 | 49.826 | 1.00 | 0.00 |
| H      |      |    |     |     |        |        |        |      |      |
| HETATM | 4462 | H7 | PRP | 259 | -5.685 | 32.429 | 49.474 | 1.00 | 0.00 |
| H      |      |    |     |     |        |        |        |      |      |
| HETATM | 4463 | H8 | PRP | 259 | -4.596 | 32.397 | 50.913 | 1.00 | 0.00 |
| H      |      |    |     |     |        |        |        |      |      |
| HETATM | 4464 | O1 | PRP | 260 | 13.358 | 34.836 | 40.820 | 1.00 | 0.00 |
| O      |      |    |     |     |        |        |        |      |      |
| HETATM | 4465 | H1 | PRP | 260 | 14.163 | 35.260 | 40.514 | 1.00 | 0.00 |
| H      |      |    |     |     |        |        |        |      |      |
| HETATM | 4466 | C1 | PRP | 260 | 13.423 | 34.743 | 42.253 | 1.00 | 0.00 |
| C      |      |    |     |     |        |        |        |      |      |
| HETATM | 4467 | H2 | PRP | 260 | 13.302 | 35.673 | 42.807 | 1.00 | 0.00 |
| H      |      |    |     |     |        |        |        |      |      |
| HETATM | 4468 | H3 | PRP | 260 | 12.574 | 34.095 | 42.469 | 1.00 | 0.00 |
| H      |      |    |     |     |        |        |        |      |      |
| HETATM | 4469 | C2 | PRP | 260 | 14.622 | 33.955 | 42.804 | 1.00 | 0.00 |
| C      |      |    |     |     |        |        |        |      |      |
| HETATM | 4470 | H4 | PRP | 260 | 14.362 | 33.504 | 43.762 | 1.00 | 0.00 |
| H      |      |    |     |     |        |        |        |      |      |
| HETATM | 4471 | O2 | PRP | 260 | 15.758 | 34.772 | 42.902 | 1.00 | 0.00 |
| O      |      |    |     |     |        |        |        |      |      |
| HETATM | 4472 | H5 | PRP | 260 | 15.867 | 35.224 | 42.062 | 1.00 | 0.00 |
| H      |      |    |     |     |        |        |        |      |      |
| HETATM | 4473 | C3 | PRP | 260 | 14.926 | 32.693 | 41.948 | 1.00 | 0.00 |
| C      |      |    |     |     |        |        |        |      |      |
| HETATM | 4474 | H6 | PRP | 260 | 13.948 | 32.254 | 41.749 | 1.00 | 0.00 |
| H      |      |    |     |     |        |        |        |      |      |
| HETATM | 4475 | H7 | PRP | 260 | 15.383 | 33.070 | 41.033 | 1.00 | 0.00 |
| H      |      |    |     |     |        |        |        |      |      |
| HETATM | 4476 | H8 | PRP | 260 | 15.625 | 32.037 | 42.466 | 1.00 | 0.00 |
| H      |      |    |     |     |        |        |        |      |      |
| HETATM | 4477 | O1 | PRP | 261 | 9.823  | 52.233 | 47.365 | 1.00 | 0.00 |
| O      |      |    |     |     |        |        |        |      |      |
| HETATM | 4478 | H1 | PRP | 261 | 9.507  | 51.400 | 47.008 | 1.00 | 0.00 |
| H      |      |    |     |     |        |        |        |      |      |
| HETATM | 4479 | C1 | PRP | 261 | 8.830  | 52.697 | 48.255 | 1.00 | 0.00 |
| C      |      |    |     |     |        |        |        |      |      |

|        |      |    |     |     |        |        |        |      |      |
|--------|------|----|-----|-----|--------|--------|--------|------|------|
| HETATM | 4480 | H2 | PRP | 261 | 8.797  | 52.067 | 49.144 | 1.00 | 0.00 |
| H      |      |    |     |     |        |        |        |      |      |
| HETATM | 4481 | H3 | PRP | 261 | 9.070  | 53.646 | 48.735 | 1.00 | 0.00 |
| H      |      |    |     |     |        |        |        |      |      |
| HETATM | 4482 | C2 | PRP | 261 | 7.394  | 52.791 | 47.683 | 1.00 | 0.00 |
| C      |      |    |     |     |        |        |        |      |      |
| HETATM | 4483 | H4 | PRP | 261 | 6.626  | 53.250 | 48.305 | 1.00 | 0.00 |
| H      |      |    |     |     |        |        |        |      |      |
| HETATM | 4484 | O2 | PRP | 261 | 7.002  | 51.498 | 47.216 | 1.00 | 0.00 |
| O      |      |    |     |     |        |        |        |      |      |
| HETATM | 4485 | H5 | PRP | 261 | 6.541  | 51.558 | 46.376 | 1.00 | 0.00 |
| H      |      |    |     |     |        |        |        |      |      |
| HETATM | 4486 | C3 | PRP | 261 | 7.463  | 53.707 | 46.439 | 1.00 | 0.00 |
| C      |      |    |     |     |        |        |        |      |      |
| HETATM | 4487 | H6 | PRP | 261 | 7.533  | 54.742 | 46.773 | 1.00 | 0.00 |
| H      |      |    |     |     |        |        |        |      |      |
| HETATM | 4488 | H7 | PRP | 261 | 8.351  | 53.481 | 45.848 | 1.00 | 0.00 |
| H      |      |    |     |     |        |        |        |      |      |
| HETATM | 4489 | H8 | PRP | 261 | 6.538  | 53.679 | 45.865 | 1.00 | 0.00 |
| H      |      |    |     |     |        |        |        |      |      |
| HETATM | 4490 | O1 | PRP | 262 | 19.912 | 47.545 | 34.868 | 1.00 | 0.00 |
| O      |      |    |     |     |        |        |        |      |      |
| HETATM | 4491 | H1 | PRP | 262 | 19.030 | 47.919 | 34.939 | 1.00 | 0.00 |
| H      |      |    |     |     |        |        |        |      |      |
| HETATM | 4492 | C1 | PRP | 262 | 20.555 | 48.550 | 34.177 | 1.00 | 0.00 |
| C      |      |    |     |     |        |        |        |      |      |
| HETATM | 4493 | H2 | PRP | 262 | 21.539 | 48.708 | 34.619 | 1.00 | 0.00 |
| H      |      |    |     |     |        |        |        |      |      |
| HETATM | 4494 | H3 | PRP | 262 | 20.595 | 48.268 | 33.124 | 1.00 | 0.00 |
| H      |      |    |     |     |        |        |        |      |      |
| HETATM | 4495 | C2 | PRP | 262 | 19.839 | 49.877 | 34.336 | 1.00 | 0.00 |
| C      |      |    |     |     |        |        |        |      |      |
| HETATM | 4496 | H4 | PRP | 262 | 19.734 | 49.972 | 35.417 | 1.00 | 0.00 |
| H      |      |    |     |     |        |        |        |      |      |
| HETATM | 4497 | O2 | PRP | 262 | 18.589 | 49.771 | 33.725 | 1.00 | 0.00 |
| O      |      |    |     |     |        |        |        |      |      |
| HETATM | 4498 | H5 | PRP | 262 | 18.651 | 49.548 | 32.793 | 1.00 | 0.00 |
| H      |      |    |     |     |        |        |        |      |      |
| HETATM | 4499 | C3 | PRP | 262 | 20.581 | 51.176 | 33.934 | 1.00 | 0.00 |
| C      |      |    |     |     |        |        |        |      |      |
| HETATM | 4500 | H6 | PRP | 262 | 21.234 | 51.483 | 34.751 | 1.00 | 0.00 |
| H      |      |    |     |     |        |        |        |      |      |
| HETATM | 4501 | H7 | PRP | 262 | 21.216 | 50.958 | 33.075 | 1.00 | 0.00 |
| H      |      |    |     |     |        |        |        |      |      |
| HETATM | 4502 | H8 | PRP | 262 | 19.819 | 51.919 | 33.698 | 1.00 | 0.00 |
| H      |      |    |     |     |        |        |        |      |      |
| HETATM | 4503 | O1 | PRP | 263 | -4.443 | 42.955 | 47.248 | 1.00 | 0.00 |
| O      |      |    |     |     |        |        |        |      |      |
| HETATM | 4504 | H1 | PRP | 263 | -3.682 | 42.384 | 47.378 | 1.00 | 0.00 |
| H      |      |    |     |     |        |        |        |      |      |
| HETATM | 4505 | C1 | PRP | 263 | -5.659 | 42.229 | 47.587 | 1.00 | 0.00 |
| C      |      |    |     |     |        |        |        |      |      |
| HETATM | 4506 | H2 | PRP | 263 | -5.865 | 42.232 | 48.657 | 1.00 | 0.00 |
| H      |      |    |     |     |        |        |        |      |      |
| HETATM | 4507 | H3 | PRP | 263 | -6.499 | 42.830 | 47.239 | 1.00 | 0.00 |
| H      |      |    |     |     |        |        |        |      |      |

|        |      |    |     |     |        |        |        |      |      |
|--------|------|----|-----|-----|--------|--------|--------|------|------|
| HETATM | 4508 | C2 | PRP | 263 | -5.873 | 40.739 | 47.103 | 1.00 | 0.00 |
| C      |      |    |     |     |        |        |        |      |      |
| HETATM | 4509 | H4 | PRP | 263 | -6.935 | 40.524 | 47.223 | 1.00 | 0.00 |
| H      |      |    |     |     |        |        |        |      |      |
| HETATM | 4510 | O2 | PRP | 263 | -5.008 | 39.903 | 47.839 | 1.00 | 0.00 |
| O      |      |    |     |     |        |        |        |      |      |
| HETATM | 4511 | H5 | PRP | 263 | -4.924 | 39.089 | 47.337 | 1.00 | 0.00 |
| H      |      |    |     |     |        |        |        |      |      |
| HETATM | 4512 | C3 | PRP | 263 | -5.390 | 40.673 | 45.669 | 1.00 | 0.00 |
| C      |      |    |     |     |        |        |        |      |      |
| HETATM | 4513 | H6 | PRP | 263 | -4.307 | 40.589 | 45.578 | 1.00 | 0.00 |
| H      |      |    |     |     |        |        |        |      |      |
| HETATM | 4514 | H7 | PRP | 263 | -5.821 | 39.746 | 45.290 | 1.00 | 0.00 |
| H      |      |    |     |     |        |        |        |      |      |
| HETATM | 4515 | H8 | PRP | 263 | -5.936 | 41.468 | 45.161 | 1.00 | 0.00 |
| H      |      |    |     |     |        |        |        |      |      |
| HETATM | 4516 | O1 | PRP | 264 | 7.735  | 30.921 | 32.994 | 1.00 | 0.00 |
| O      |      |    |     |     |        |        |        |      |      |
| HETATM | 4517 | H1 | PRP | 264 | 8.572  | 30.482 | 32.825 | 1.00 | 0.00 |
| H      |      |    |     |     |        |        |        |      |      |
| HETATM | 4518 | C1 | PRP | 264 | 7.829  | 32.211 | 32.681 | 1.00 | 0.00 |
| C      |      |    |     |     |        |        |        |      |      |
| HETATM | 4519 | H2 | PRP | 264 | 7.638  | 32.469 | 31.640 | 1.00 | 0.00 |
| H      |      |    |     |     |        |        |        |      |      |
| HETATM | 4520 | H3 | PRP | 264 | 7.126  | 32.846 | 33.221 | 1.00 | 0.00 |
| H      |      |    |     |     |        |        |        |      |      |
| HETATM | 4521 | C2 | PRP | 264 | 9.180  | 32.810 | 32.975 | 1.00 | 0.00 |
| C      |      |    |     |     |        |        |        |      |      |
| HETATM | 4522 | H4 | PRP | 264 | 9.180  | 33.836 | 32.607 | 1.00 | 0.00 |
| H      |      |    |     |     |        |        |        |      |      |
| HETATM | 4523 | O2 | PRP | 264 | 10.176 | 32.095 | 32.260 | 1.00 | 0.00 |
| O      |      |    |     |     |        |        |        |      |      |
| HETATM | 4524 | H5 | PRP | 264 | 11.024 | 32.512 | 32.430 | 1.00 | 0.00 |
| H      |      |    |     |     |        |        |        |      |      |
| HETATM | 4525 | C3 | PRP | 264 | 9.463  | 32.820 | 34.456 | 1.00 | 0.00 |
| C      |      |    |     |     |        |        |        |      |      |
| HETATM | 4526 | H6 | PRP | 264 | 9.860  | 31.834 | 34.697 | 1.00 | 0.00 |
| H      |      |    |     |     |        |        |        |      |      |
| HETATM | 4527 | H7 | PRP | 264 | 10.140 | 33.628 | 34.736 | 1.00 | 0.00 |
| H      |      |    |     |     |        |        |        |      |      |
| HETATM | 4528 | H8 | PRP | 264 | 8.646  | 33.025 | 35.148 | 1.00 | 0.00 |
| H      |      |    |     |     |        |        |        |      |      |
| HETATM | 4529 | O1 | PRP | 265 | -1.048 | 31.805 | 60.925 | 1.00 | 0.00 |
| O      |      |    |     |     |        |        |        |      |      |
| HETATM | 4530 | H1 | PRP | 265 | -1.393 | 31.911 | 61.814 | 1.00 | 0.00 |
| H      |      |    |     |     |        |        |        |      |      |
| HETATM | 4531 | C1 | PRP | 265 | 0.335  | 32.178 | 60.832 | 1.00 | 0.00 |
| C      |      |    |     |     |        |        |        |      |      |
| HETATM | 4532 | H2 | PRP | 265 | 0.535  | 33.064 | 61.435 | 1.00 | 0.00 |
| H      |      |    |     |     |        |        |        |      |      |
| HETATM | 4533 | H3 | PRP | 265 | 0.908  | 31.386 | 61.314 | 1.00 | 0.00 |
| H      |      |    |     |     |        |        |        |      |      |
| HETATM | 4534 | C2 | PRP | 265 | 0.760  | 32.247 | 59.339 | 1.00 | 0.00 |
| C      |      |    |     |     |        |        |        |      |      |
| HETATM | 4535 | H4 | PRP | 265 | 0.262  | 33.073 | 58.831 | 1.00 | 0.00 |
| H      |      |    |     |     |        |        |        |      |      |

|        |      |    |     |     |        |        |        |      |      |
|--------|------|----|-----|-----|--------|--------|--------|------|------|
| HETATM | 4536 | O2 | PRP | 265 | 0.513  | 31.009 | 58.678 | 1.00 | 0.00 |
| O      |      |    |     |     |        |        |        |      |      |
| HETATM | 4537 | H5 | PRP | 265 | -0.357 | 30.660 | 58.883 | 1.00 | 0.00 |
| H      |      |    |     |     |        |        |        |      |      |
| HETATM | 4538 | C3 | PRP | 265 | 2.230  | 32.623 | 59.382 | 1.00 | 0.00 |
| C      |      |    |     |     |        |        |        |      |      |
| HETATM | 4539 | H6 | PRP | 265 | 2.859  | 31.792 | 59.700 | 1.00 | 0.00 |
| H      |      |    |     |     |        |        |        |      |      |
| HETATM | 4540 | H7 | PRP | 265 | 2.428  | 32.997 | 58.378 | 1.00 | 0.00 |
| H      |      |    |     |     |        |        |        |      |      |
| HETATM | 4541 | H8 | PRP | 265 | 2.343  | 33.365 | 60.173 | 1.00 | 0.00 |
| H      |      |    |     |     |        |        |        |      |      |
| HETATM | 4542 | O1 | PRP | 266 | 2.776  | 40.786 | 48.474 | 1.00 | 0.00 |
| O      |      |    |     |     |        |        |        |      |      |
| HETATM | 4543 | H1 | PRP | 266 | 3.590  | 40.331 | 48.702 | 1.00 | 0.00 |
| H      |      |    |     |     |        |        |        |      |      |
| HETATM | 4544 | C1 | PRP | 266 | 3.053  | 42.123 | 48.843 | 1.00 | 0.00 |
| C      |      |    |     |     |        |        |        |      |      |
| HETATM | 4545 | H2 | PRP | 266 | 2.459  | 42.669 | 48.111 | 1.00 | 0.00 |
| H      |      |    |     |     |        |        |        |      |      |
| HETATM | 4546 | H3 | PRP | 266 | 2.583  | 42.287 | 49.813 | 1.00 | 0.00 |
| H      |      |    |     |     |        |        |        |      |      |
| HETATM | 4547 | C2 | PRP | 266 | 4.497  | 42.556 | 48.744 | 1.00 | 0.00 |
| C      |      |    |     |     |        |        |        |      |      |
| HETATM | 4548 | H4 | PRP | 266 | 4.992  | 41.993 | 47.953 | 1.00 | 0.00 |
| H      |      |    |     |     |        |        |        |      |      |
| HETATM | 4549 | O2 | PRP | 266 | 5.090  | 42.201 | 49.984 | 1.00 | 0.00 |
| O      |      |    |     |     |        |        |        |      |      |
| HETATM | 4550 | H5 | PRP | 266 | 5.266  | 41.258 | 49.979 | 1.00 | 0.00 |
| H      |      |    |     |     |        |        |        |      |      |
| HETATM | 4551 | C3 | PRP | 266 | 4.728  | 44.016 | 48.466 | 1.00 | 0.00 |
| C      |      |    |     |     |        |        |        |      |      |
| HETATM | 4552 | H6 | PRP | 266 | 4.371  | 44.217 | 47.456 | 1.00 | 0.00 |
| H      |      |    |     |     |        |        |        |      |      |
| HETATM | 4553 | H7 | PRP | 266 | 4.203  | 44.499 | 49.289 | 1.00 | 0.00 |
| H      |      |    |     |     |        |        |        |      |      |
| HETATM | 4554 | H8 | PRP | 266 | 5.753  | 44.333 | 48.658 | 1.00 | 0.00 |
| H      |      |    |     |     |        |        |        |      |      |
| HETATM | 4555 | O1 | PRP | 267 | 1.441  | 36.680 | 49.644 | 1.00 | 0.00 |
| O      |      |    |     |     |        |        |        |      |      |
| HETATM | 4556 | H1 | PRP | 267 | 1.267  | 37.133 | 50.472 | 1.00 | 0.00 |
| H      |      |    |     |     |        |        |        |      |      |
| HETATM | 4557 | C1 | PRP | 267 | 0.218  | 36.684 | 48.889 | 1.00 | 0.00 |
| C      |      |    |     |     |        |        |        |      |      |
| HETATM | 4558 | H2 | PRP | 267 | -0.076 | 37.714 | 48.685 | 1.00 | 0.00 |
| H      |      |    |     |     |        |        |        |      |      |
| HETATM | 4559 | H3 | PRP | 267 | 0.341  | 36.324 | 47.867 | 1.00 | 0.00 |
| H      |      |    |     |     |        |        |        |      |      |
| HETATM | 4560 | C2 | PRP | 267 | -0.947 | 35.801 | 49.473 | 1.00 | 0.00 |
| C      |      |    |     |     |        |        |        |      |      |
| HETATM | 4561 | H4 | PRP | 267 | -1.114 | 36.107 | 50.506 | 1.00 | 0.00 |
| H      |      |    |     |     |        |        |        |      |      |
| HETATM | 4562 | O2 | PRP | 267 | -0.816 | 34.417 | 49.278 | 1.00 | 0.00 |
| O      |      |    |     |     |        |        |        |      |      |
| HETATM | 4563 | H5 | PRP | 267 | 0.028  | 34.090 | 49.600 | 1.00 | 0.00 |
| H      |      |    |     |     |        |        |        |      |      |

|        |      |    |     |     |        |        |        |      |      |
|--------|------|----|-----|-----|--------|--------|--------|------|------|
| HETATM | 4564 | C3 | PRP | 267 | -2.198 | 36.102 | 48.613 | 1.00 | 0.00 |
| C      |      |    |     |     |        |        |        |      |      |
| HETATM | 4565 | H6 | PRP | 267 | -2.293 | 37.170 | 48.417 | 1.00 | 0.00 |
| H      |      |    |     |     |        |        |        |      |      |
| HETATM | 4566 | H7 | PRP | 267 | -1.988 | 35.648 | 47.644 | 1.00 | 0.00 |
| H      |      |    |     |     |        |        |        |      |      |
| HETATM | 4567 | H8 | PRP | 267 | -3.142 | 35.735 | 49.015 | 1.00 | 0.00 |
| H      |      |    |     |     |        |        |        |      |      |
| HETATM | 4568 | O1 | PRP | 268 | 17.552 | 45.940 | 35.677 | 1.00 | 0.00 |
| O      |      |    |     |     |        |        |        |      |      |
| HETATM | 4569 | H1 | PRP | 268 | 17.471 | 46.055 | 36.626 | 1.00 | 0.00 |
| H      |      |    |     |     |        |        |        |      |      |
| HETATM | 4570 | C1 | PRP | 268 | 17.410 | 44.559 | 35.259 | 1.00 | 0.00 |
| C      |      |    |     |     |        |        |        |      |      |
| HETATM | 4571 | H2 | PRP | 268 | 17.885 | 43.905 | 35.990 | 1.00 | 0.00 |
| H      |      |    |     |     |        |        |        |      |      |
| HETATM | 4572 | H3 | PRP | 268 | 16.335 | 44.390 | 35.195 | 1.00 | 0.00 |
| H      |      |    |     |     |        |        |        |      |      |
| HETATM | 4573 | C2 | PRP | 268 | 18.096 | 44.316 | 33.959 | 1.00 | 0.00 |
| C      |      |    |     |     |        |        |        |      |      |
| HETATM | 4574 | H4 | PRP | 268 | 19.134 | 44.649 | 33.947 | 1.00 | 0.00 |
| H      |      |    |     |     |        |        |        |      |      |
| HETATM | 4575 | O2 | PRP | 268 | 17.444 | 45.112 | 33.026 | 1.00 | 0.00 |
| O      |      |    |     |     |        |        |        |      |      |
| HETATM | 4576 | H5 | PRP | 268 | 17.440 | 46.007 | 33.372 | 1.00 | 0.00 |
| H      |      |    |     |     |        |        |        |      |      |
| HETATM | 4577 | C3 | PRP | 268 | 17.922 | 42.824 | 33.607 | 1.00 | 0.00 |
| C      |      |    |     |     |        |        |        |      |      |
| HETATM | 4578 | H6 | PRP | 268 | 18.439 | 42.663 | 32.661 | 1.00 | 0.00 |
| H      |      |    |     |     |        |        |        |      |      |
| HETATM | 4579 | H7 | PRP | 268 | 18.310 | 42.248 | 34.447 | 1.00 | 0.00 |
| H      |      |    |     |     |        |        |        |      |      |
| HETATM | 4580 | H8 | PRP | 268 | 16.851 | 42.651 | 33.501 | 1.00 | 0.00 |
| H      |      |    |     |     |        |        |        |      |      |
| HETATM | 4581 | O1 | PRP | 269 | 27.133 | 44.232 | 43.231 | 1.00 | 0.00 |
| O      |      |    |     |     |        |        |        |      |      |
| HETATM | 4582 | H1 | PRP | 269 | 26.946 | 43.361 | 43.590 | 1.00 | 0.00 |
| H      |      |    |     |     |        |        |        |      |      |
| HETATM | 4583 | C1 | PRP | 269 | 26.186 | 45.034 | 43.802 | 1.00 | 0.00 |
| C      |      |    |     |     |        |        |        |      |      |
| HETATM | 4584 | H2 | PRP | 269 | 26.674 | 45.990 | 43.991 | 1.00 | 0.00 |
| H      |      |    |     |     |        |        |        |      |      |
| HETATM | 4585 | H3 | PRP | 269 | 25.458 | 45.339 | 43.050 | 1.00 | 0.00 |
| H      |      |    |     |     |        |        |        |      |      |
| HETATM | 4586 | C2 | PRP | 269 | 25.546 | 44.345 | 45.053 | 1.00 | 0.00 |
| C      |      |    |     |     |        |        |        |      |      |
| HETATM | 4587 | H4 | PRP | 269 | 26.262 | 43.826 | 45.691 | 1.00 | 0.00 |
| H      |      |    |     |     |        |        |        |      |      |
| HETATM | 4588 | O2 | PRP | 269 | 24.453 | 43.616 | 44.727 | 1.00 | 0.00 |
| O      |      |    |     |     |        |        |        |      |      |
| HETATM | 4589 | H5 | PRP | 269 | 23.801 | 44.224 | 44.372 | 1.00 | 0.00 |
| H      |      |    |     |     |        |        |        |      |      |
| HETATM | 4590 | C3 | PRP | 269 | 25.070 | 45.370 | 46.050 | 1.00 | 0.00 |
| C      |      |    |     |     |        |        |        |      |      |
| HETATM | 4591 | H6 | PRP | 269 | 24.214 | 45.108 | 46.672 | 1.00 | 0.00 |
| H      |      |    |     |     |        |        |        |      |      |

|        |      |    |     |     |        |        |        |      |      |
|--------|------|----|-----|-----|--------|--------|--------|------|------|
| HETATM | 4592 | H7 | PRP | 269 | 25.922 | 45.749 | 46.614 | 1.00 | 0.00 |
| H      |      |    |     |     |        |        |        |      |      |
| HETATM | 4593 | H8 | PRP | 269 | 24.741 | 46.192 | 45.414 | 1.00 | 0.00 |
| H      |      |    |     |     |        |        |        |      |      |
| HETATM | 4594 | O1 | PRP | 270 | 9.310  | 19.682 | 39.338 | 1.00 | 0.00 |
| O      |      |    |     |     |        |        |        |      |      |
| HETATM | 4595 | H1 | PRP | 270 | 8.588  | 19.058 | 39.437 | 1.00 | 0.00 |
| H      |      |    |     |     |        |        |        |      |      |
| HETATM | 4596 | C1 | PRP | 270 | 9.105  | 20.352 | 38.093 | 1.00 | 0.00 |
| C      |      |    |     |     |        |        |        |      |      |
| HETATM | 4597 | H2 | PRP | 270 | 9.827  | 19.987 | 37.363 | 1.00 | 0.00 |
| H      |      |    |     |     |        |        |        |      |      |
| HETATM | 4598 | H3 | PRP | 270 | 8.133  | 20.337 | 37.600 | 1.00 | 0.00 |
| H      |      |    |     |     |        |        |        |      |      |
| HETATM | 4599 | C2 | PRP | 270 | 9.455  | 21.773 | 38.461 | 1.00 | 0.00 |
| C      |      |    |     |     |        |        |        |      |      |
| HETATM | 4600 | H4 | PRP | 270 | 10.373 | 21.772 | 39.047 | 1.00 | 0.00 |
| H      |      |    |     |     |        |        |        |      |      |
| HETATM | 4601 | O2 | PRP | 270 | 8.389  | 22.275 | 39.234 | 1.00 | 0.00 |
| O      |      |    |     |     |        |        |        |      |      |
| HETATM | 4602 | H5 | PRP | 270 | 8.170  | 21.649 | 39.928 | 1.00 | 0.00 |
| H      |      |    |     |     |        |        |        |      |      |
| HETATM | 4603 | C3 | PRP | 270 | 9.493  | 22.780 | 37.280 | 1.00 | 0.00 |
| C      |      |    |     |     |        |        |        |      |      |
| HETATM | 4604 | H6 | PRP | 270 | 8.523  | 22.918 | 36.803 | 1.00 | 0.00 |
| H      |      |    |     |     |        |        |        |      |      |
| HETATM | 4605 | H7 | PRP | 270 | 9.680  | 23.795 | 37.632 | 1.00 | 0.00 |
| H      |      |    |     |     |        |        |        |      |      |
| HETATM | 4606 | H8 | PRP | 270 | 10.320 | 22.432 | 36.662 | 1.00 | 0.00 |
| H      |      |    |     |     |        |        |        |      |      |
| HETATM | 4607 | O1 | PRP | 271 | 28.250 | 23.078 | 41.898 | 1.00 | 0.00 |
| O      |      |    |     |     |        |        |        |      |      |
| HETATM | 4608 | H1 | PRP | 271 | 28.806 | 22.303 | 42.010 | 1.00 | 0.00 |
| H      |      |    |     |     |        |        |        |      |      |
| HETATM | 4609 | C1 | PRP | 271 | 28.541 | 23.731 | 40.660 | 1.00 | 0.00 |
| C      |      |    |     |     |        |        |        |      |      |
| HETATM | 4610 | H2 | PRP | 271 | 29.061 | 24.673 | 40.832 | 1.00 | 0.00 |
| H      |      |    |     |     |        |        |        |      |      |
| HETATM | 4611 | H3 | PRP | 271 | 29.246 | 23.018 | 40.233 | 1.00 | 0.00 |
| H      |      |    |     |     |        |        |        |      |      |
| HETATM | 4612 | C2 | PRP | 271 | 27.401 | 23.911 | 39.697 | 1.00 | 0.00 |
| C      |      |    |     |     |        |        |        |      |      |
| HETATM | 4613 | H4 | PRP | 271 | 26.508 | 24.245 | 40.224 | 1.00 | 0.00 |
| H      |      |    |     |     |        |        |        |      |      |
| HETATM | 4614 | O2 | PRP | 271 | 27.233 | 22.764 | 38.917 | 1.00 | 0.00 |
| O      |      |    |     |     |        |        |        |      |      |
| HETATM | 4615 | H5 | PRP | 271 | 26.818 | 22.074 | 39.440 | 1.00 | 0.00 |
| H      |      |    |     |     |        |        |        |      |      |
| HETATM | 4616 | C3 | PRP | 271 | 27.883 | 25.019 | 38.722 | 1.00 | 0.00 |
| C      |      |    |     |     |        |        |        |      |      |
| HETATM | 4617 | H6 | PRP | 271 | 27.128 | 25.273 | 37.978 | 1.00 | 0.00 |
| H      |      |    |     |     |        |        |        |      |      |
| HETATM | 4618 | H7 | PRP | 271 | 28.126 | 25.906 | 39.307 | 1.00 | 0.00 |
| H      |      |    |     |     |        |        |        |      |      |
| HETATM | 4619 | H8 | PRP | 271 | 28.818 | 24.758 | 38.226 | 1.00 | 0.00 |
| H      |      |    |     |     |        |        |        |      |      |



|        |      |    |     |     |        |        |        |      |      |
|--------|------|----|-----|-----|--------|--------|--------|------|------|
| HETATM | 4620 | O1 | PRP | 272 | 8.713  | 32.715 | 22.416 | 1.00 | 0.00 |
| O      |      |    |     |     |        |        |        |      |      |
| HETATM | 4621 | H1 | PRP | 272 | 8.688  | 32.937 | 21.482 | 1.00 | 0.00 |
| H      |      |    |     |     |        |        |        |      |      |
| HETATM | 4622 | C1 | PRP | 272 | 9.565  | 31.557 | 22.583 | 1.00 | 0.00 |
| C      |      |    |     |     |        |        |        |      |      |
| HETATM | 4623 | H2 | PRP | 272 | 9.015  | 30.644 | 22.353 | 1.00 | 0.00 |
| H      |      |    |     |     |        |        |        |      |      |
| HETATM | 4624 | H3 | PRP | 272 | 10.370 | 31.572 | 21.848 | 1.00 | 0.00 |
| H      |      |    |     |     |        |        |        |      |      |
| HETATM | 4625 | C2 | PRP | 272 | 10.312 | 31.616 | 23.925 | 1.00 | 0.00 |
| C      |      |    |     |     |        |        |        |      |      |
| HETATM | 4626 | H4 | PRP | 272 | 10.926 | 30.716 | 23.924 | 1.00 | 0.00 |
| H      |      |    |     |     |        |        |        |      |      |
| HETATM | 4627 | O2 | PRP | 272 | 9.227  | 31.566 | 24.903 | 1.00 | 0.00 |
| O      |      |    |     |     |        |        |        |      |      |
| HETATM | 4628 | H5 | PRP | 272 | 8.584  | 32.243 | 24.679 | 1.00 | 0.00 |
| H      |      |    |     |     |        |        |        |      |      |
| HETATM | 4629 | C3 | PRP | 272 | 11.227 | 32.820 | 24.203 | 1.00 | 0.00 |
| C      |      |    |     |     |        |        |        |      |      |
| HETATM | 4630 | H6 | PRP | 272 | 10.609 | 33.689 | 23.978 | 1.00 | 0.00 |
| H      |      |    |     |     |        |        |        |      |      |
| HETATM | 4631 | H7 | PRP | 272 | 11.608 | 32.956 | 25.215 | 1.00 | 0.00 |
| H      |      |    |     |     |        |        |        |      |      |
| HETATM | 4632 | H8 | PRP | 272 | 11.961 | 32.707 | 23.405 | 1.00 | 0.00 |
| H      |      |    |     |     |        |        |        |      |      |
| HETATM | 4633 | O1 | PRP | 273 | 12.915 | 20.326 | 30.434 | 1.00 | 0.00 |
| O      |      |    |     |     |        |        |        |      |      |
| HETATM | 4634 | H1 | PRP | 273 | 12.019 | 20.153 | 30.731 | 1.00 | 0.00 |
| H      |      |    |     |     |        |        |        |      |      |
| HETATM | 4635 | C1 | PRP | 273 | 12.955 | 20.101 | 29.084 | 1.00 | 0.00 |
| C      |      |    |     |     |        |        |        |      |      |
| HETATM | 4636 | H2 | PRP | 273 | 13.961 | 20.004 | 28.675 | 1.00 | 0.00 |
| H      |      |    |     |     |        |        |        |      |      |
| HETATM | 4637 | H3 | PRP | 273 | 12.418 | 19.233 | 28.704 | 1.00 | 0.00 |
| H      |      |    |     |     |        |        |        |      |      |
| HETATM | 4638 | C2 | PRP | 273 | 12.274 | 21.304 | 28.410 | 1.00 | 0.00 |
| C      |      |    |     |     |        |        |        |      |      |
| HETATM | 4639 | H4 | PRP | 273 | 12.791 | 22.248 | 28.581 | 1.00 | 0.00 |
| H      |      |    |     |     |        |        |        |      |      |
| HETATM | 4640 | O2 | PRP | 273 | 10.960 | 21.503 | 28.918 | 1.00 | 0.00 |
| O      |      |    |     |     |        |        |        |      |      |
| HETATM | 4641 | H5 | PRP | 273 | 10.469 | 20.709 | 28.695 | 1.00 | 0.00 |
| H      |      |    |     |     |        |        |        |      |      |
| HETATM | 4642 | C3 | PRP | 273 | 11.953 | 21.086 | 26.900 | 1.00 | 0.00 |
| C      |      |    |     |     |        |        |        |      |      |
| HETATM | 4643 | H6 | PRP | 273 | 11.560 | 22.060 | 26.609 | 1.00 | 0.00 |
| H      |      |    |     |     |        |        |        |      |      |
| HETATM | 4644 | H7 | PRP | 273 | 12.797 | 20.805 | 26.270 | 1.00 | 0.00 |
| H      |      |    |     |     |        |        |        |      |      |
| HETATM | 4645 | H8 | PRP | 273 | 11.249 | 20.266 | 26.761 | 1.00 | 0.00 |
| H      |      |    |     |     |        |        |        |      |      |
| HETATM | 4646 | O1 | PRP | 274 | 14.027 | 31.294 | 38.451 | 1.00 | 0.00 |
| O      |      |    |     |     |        |        |        |      |      |
| HETATM | 4647 | H1 | PRP | 274 | 14.021 | 31.011 | 39.368 | 1.00 | 0.00 |
| H      |      |    |     |     |        |        |        |      |      |

|        |      |    |     |     |        |        |        |      |      |
|--------|------|----|-----|-----|--------|--------|--------|------|------|
| HETATM | 4648 | C1 | PRP | 274 | 13.687 | 32.649 | 38.162 | 1.00 | 0.00 |
| C      |      |    |     |     |        |        |        |      |      |
| HETATM | 4649 | H2 | PRP | 274 | 12.710 | 32.885 | 38.584 | 1.00 | 0.00 |
| H      |      |    |     |     |        |        |        |      |      |
| HETATM | 4650 | H3 | PRP | 274 | 14.416 | 33.335 | 38.595 | 1.00 | 0.00 |
| H      |      |    |     |     |        |        |        |      |      |
| HETATM | 4651 | C2 | PRP | 274 | 13.524 | 32.779 | 36.669 | 1.00 | 0.00 |
| C      |      |    |     |     |        |        |        |      |      |
| HETATM | 4652 | H4 | PRP | 274 | 12.848 | 31.998 | 36.320 | 1.00 | 0.00 |
| H      |      |    |     |     |        |        |        |      |      |
| HETATM | 4653 | O2 | PRP | 274 | 14.815 | 32.737 | 36.053 | 1.00 | 0.00 |
| O      |      |    |     |     |        |        |        |      |      |
| HETATM | 4654 | H5 | PRP | 274 | 15.350 | 32.146 | 36.589 | 1.00 | 0.00 |
| H      |      |    |     |     |        |        |        |      |      |
| HETATM | 4655 | C3 | PRP | 274 | 12.831 | 34.096 | 36.263 | 1.00 | 0.00 |
| C      |      |    |     |     |        |        |        |      |      |
| HETATM | 4656 | H6 | PRP | 274 | 13.307 | 34.983 | 36.682 | 1.00 | 0.00 |
| H      |      |    |     |     |        |        |        |      |      |
| HETATM | 4657 | H7 | PRP | 274 | 12.807 | 34.286 | 35.190 | 1.00 | 0.00 |
| H      |      |    |     |     |        |        |        |      |      |
| HETATM | 4658 | H8 | PRP | 274 | 11.767 | 34.086 | 36.501 | 1.00 | 0.00 |
| H      |      |    |     |     |        |        |        |      |      |
| HETATM | 4659 | O1 | PRP | 275 | 6.845  | 29.972 | 41.463 | 1.00 | 0.00 |
| O      |      |    |     |     |        |        |        |      |      |
| HETATM | 4660 | H1 | PRP | 275 | 6.781  | 29.634 | 42.360 | 1.00 | 0.00 |
| H      |      |    |     |     |        |        |        |      |      |
| HETATM | 4661 | C1 | PRP | 275 | 5.655  | 29.597 | 40.738 | 1.00 | 0.00 |
| C      |      |    |     |     |        |        |        |      |      |
| HETATM | 4662 | H2 | PRP | 275 | 5.994  | 29.163 | 39.798 | 1.00 | 0.00 |
| H      |      |    |     |     |        |        |        |      |      |
| HETATM | 4663 | H3 | PRP | 275 | 5.088  | 28.872 | 41.323 | 1.00 | 0.00 |
| H      |      |    |     |     |        |        |        |      |      |
| HETATM | 4664 | C2 | PRP | 275 | 4.778  | 30.841 | 40.527 | 1.00 | 0.00 |
| C      |      |    |     |     |        |        |        |      |      |
| HETATM | 4665 | H4 | PRP | 275 | 3.847  | 30.401 | 40.169 | 1.00 | 0.00 |
| H      |      |    |     |     |        |        |        |      |      |
| HETATM | 4666 | O2 | PRP | 275 | 5.372  | 31.775 | 39.618 | 1.00 | 0.00 |
| O      |      |    |     |     |        |        |        |      |      |
| HETATM | 4667 | H5 | PRP | 275 | 5.894  | 31.311 | 38.959 | 1.00 | 0.00 |
| H      |      |    |     |     |        |        |        |      |      |
| HETATM | 4668 | C3 | PRP | 275 | 4.478  | 31.608 | 41.799 | 1.00 | 0.00 |
| C      |      |    |     |     |        |        |        |      |      |
| HETATM | 4669 | H6 | PRP | 275 | 3.869  | 32.448 | 41.465 | 1.00 | 0.00 |
| H      |      |    |     |     |        |        |        |      |      |
| HETATM | 4670 | H7 | PRP | 275 | 3.924  | 30.952 | 42.471 | 1.00 | 0.00 |
| H      |      |    |     |     |        |        |        |      |      |
| HETATM | 4671 | H8 | PRP | 275 | 5.383  | 31.833 | 42.363 | 1.00 | 0.00 |
| H      |      |    |     |     |        |        |        |      |      |
| HETATM | 4672 | O1 | PRP | 276 | 33.943 | 50.151 | 38.736 | 1.00 | 0.00 |
| O      |      |    |     |     |        |        |        |      |      |
| HETATM | 4673 | H1 | PRP | 276 | 33.959 | 50.000 | 39.684 | 1.00 | 0.00 |
| H      |      |    |     |     |        |        |        |      |      |
| HETATM | 4674 | C1 | PRP | 276 | 33.070 | 49.145 | 38.139 | 1.00 | 0.00 |
| C      |      |    |     |     |        |        |        |      |      |
| HETATM | 4675 | H2 | PRP | 276 | 33.171 | 49.188 | 37.054 | 1.00 | 0.00 |
| H      |      |    |     |     |        |        |        |      |      |

|        |      |    |     |     |        |        |        |      |      |
|--------|------|----|-----|-----|--------|--------|--------|------|------|
| HETATM | 4676 | H3 | PRP | 276 | 33.340 | 48.136 | 38.451 | 1.00 | 0.00 |
| H      |      |    |     |     |        |        |        |      |      |
| HETATM | 4677 | C2 | PRP | 276 | 31.642 | 49.319 | 38.559 | 1.00 | 0.00 |
| C      |      |    |     |     |        |        |        |      |      |
| HETATM | 4678 | H4 | PRP | 276 | 31.362 | 50.305 | 38.189 | 1.00 | 0.00 |
| H      |      |    |     |     |        |        |        |      |      |
| HETATM | 4679 | O2 | PRP | 276 | 31.361 | 49.190 | 39.948 | 1.00 | 0.00 |
| O      |      |    |     |     |        |        |        |      |      |
| HETATM | 4680 | H5 | PRP | 276 | 30.501 | 49.613 | 39.998 | 1.00 | 0.00 |
| H      |      |    |     |     |        |        |        |      |      |
| HETATM | 4681 | C3 | PRP | 276 | 30.764 | 48.287 | 37.945 | 1.00 | 0.00 |
| C      |      |    |     |     |        |        |        |      |      |
| HETATM | 4682 | H6 | PRP | 276 | 31.200 | 47.296 | 38.068 | 1.00 | 0.00 |
| H      |      |    |     |     |        |        |        |      |      |
| HETATM | 4683 | H7 | PRP | 276 | 29.841 | 48.242 | 38.524 | 1.00 | 0.00 |
| H      |      |    |     |     |        |        |        |      |      |
| HETATM | 4684 | H8 | PRP | 276 | 30.534 | 48.536 | 36.909 | 1.00 | 0.00 |
| H      |      |    |     |     |        |        |        |      |      |
| HETATM | 4685 | O1 | PRP | 277 | -3.126 | 34.094 | 37.201 | 1.00 | 0.00 |
| O      |      |    |     |     |        |        |        |      |      |
| HETATM | 4686 | H1 | PRP | 277 | -2.579 | 33.643 | 36.555 | 1.00 | 0.00 |
| H      |      |    |     |     |        |        |        |      |      |
| HETATM | 4687 | C1 | PRP | 277 | -2.667 | 33.744 | 38.482 | 1.00 | 0.00 |
| C      |      |    |     |     |        |        |        |      |      |
| HETATM | 4688 | H2 | PRP | 277 | -2.230 | 32.746 | 38.435 | 1.00 | 0.00 |
| H      |      |    |     |     |        |        |        |      |      |
| HETATM | 4689 | H3 | PRP | 277 | -1.867 | 34.383 | 38.857 | 1.00 | 0.00 |
| H      |      |    |     |     |        |        |        |      |      |
| HETATM | 4690 | C2 | PRP | 277 | -3.875 | 33.793 | 39.582 | 1.00 | 0.00 |
| C      |      |    |     |     |        |        |        |      |      |
| HETATM | 4691 | H4 | PRP | 277 | -3.596 | 33.351 | 40.539 | 1.00 | 0.00 |
| H      |      |    |     |     |        |        |        |      |      |
| HETATM | 4692 | O2 | PRP | 277 | -5.023 | 33.253 | 38.921 | 1.00 | 0.00 |
| O      |      |    |     |     |        |        |        |      |      |
| HETATM | 4693 | H5 | PRP | 277 | -4.679 | 33.027 | 38.054 | 1.00 | 0.00 |
| H      |      |    |     |     |        |        |        |      |      |
| HETATM | 4694 | C3 | PRP | 277 | -4.281 | 35.190 | 39.861 | 1.00 | 0.00 |
| C      |      |    |     |     |        |        |        |      |      |
| HETATM | 4695 | H6 | PRP | 277 | -5.029 | 35.553 | 39.157 | 1.00 | 0.00 |
| H      |      |    |     |     |        |        |        |      |      |
| HETATM | 4696 | H7 | PRP | 277 | -4.755 | 35.335 | 40.832 | 1.00 | 0.00 |
| H      |      |    |     |     |        |        |        |      |      |
| HETATM | 4697 | H8 | PRP | 277 | -3.416 | 35.852 | 39.841 | 1.00 | 0.00 |
| H      |      |    |     |     |        |        |        |      |      |
| HETATM | 4698 | O1 | PRP | 278 | 2.676  | 42.446 | 54.917 | 1.00 | 0.00 |
| O      |      |    |     |     |        |        |        |      |      |
| HETATM | 4699 | H1 | PRP | 278 | 2.040  | 41.802 | 54.597 | 1.00 | 0.00 |
| H      |      |    |     |     |        |        |        |      |      |
| HETATM | 4700 | C1 | PRP | 278 | 2.914  | 42.111 | 56.334 | 1.00 | 0.00 |
| C      |      |    |     |     |        |        |        |      |      |
| HETATM | 4701 | H2 | PRP | 278 | 3.832  | 42.603 | 56.657 | 1.00 | 0.00 |
| H      |      |    |     |     |        |        |        |      |      |
| HETATM | 4702 | H3 | PRP | 278 | 2.186  | 42.520 | 57.034 | 1.00 | 0.00 |
| H      |      |    |     |     |        |        |        |      |      |
| HETATM | 4703 | C2 | PRP | 278 | 2.865  | 40.578 | 56.582 | 1.00 | 0.00 |
| C      |      |    |     |     |        |        |        |      |      |

|        |      |    |     |     |        |        |        |      |      |
|--------|------|----|-----|-----|--------|--------|--------|------|------|
| HETATM | 4704 | H4 | PRP | 278 | 3.660  | 40.219 | 55.929 | 1.00 | 0.00 |
| H      |      |    |     |     |        |        |        |      |      |
| HETATM | 4705 | O2 | PRP | 278 | 1.633  | 39.888 | 56.406 | 1.00 | 0.00 |
| O      |      |    |     |     |        |        |        |      |      |
| HETATM | 4706 | H5 | PRP | 278 | 1.353  | 39.936 | 55.489 | 1.00 | 0.00 |
| H      |      |    |     |     |        |        |        |      |      |
| HETATM | 4707 | C3 | PRP | 278 | 3.469  | 40.265 | 58.006 | 1.00 | 0.00 |
| C      |      |    |     |     |        |        |        |      |      |
| HETATM | 4708 | H6 | PRP | 278 | 4.436  | 40.757 | 58.111 | 1.00 | 0.00 |
| H      |      |    |     |     |        |        |        |      |      |
| HETATM | 4709 | H7 | PRP | 278 | 2.872  | 40.782 | 58.757 | 1.00 | 0.00 |
| H      |      |    |     |     |        |        |        |      |      |
| HETATM | 4710 | H8 | PRP | 278 | 3.633  | 39.205 | 58.200 | 1.00 | 0.00 |
| H      |      |    |     |     |        |        |        |      |      |
| HETATM | 4711 | O1 | PRP | 279 | -1.050 | 27.660 | 49.092 | 1.00 | 0.00 |
| O      |      |    |     |     |        |        |        |      |      |
| HETATM | 4712 | H1 | PRP | 279 | -1.631 | 27.843 | 48.350 | 1.00 | 0.00 |
| H      |      |    |     |     |        |        |        |      |      |
| HETATM | 4713 | C1 | PRP | 279 | -0.902 | 28.821 | 49.922 | 1.00 | 0.00 |
| C      |      |    |     |     |        |        |        |      |      |
| HETATM | 4714 | H2 | PRP | 279 | -1.874 | 29.052 | 50.359 | 1.00 | 0.00 |
| H      |      |    |     |     |        |        |        |      |      |
| HETATM | 4715 | H3 | PRP | 279 | -0.191 | 28.567 | 50.708 | 1.00 | 0.00 |
| H      |      |    |     |     |        |        |        |      |      |
| HETATM | 4716 | C2 | PRP | 279 | -0.294 | 29.989 | 49.210 | 1.00 | 0.00 |
| C      |      |    |     |     |        |        |        |      |      |
| HETATM | 4717 | H4 | PRP | 279 | 0.081  | 30.761 | 49.883 | 1.00 | 0.00 |
| H      |      |    |     |     |        |        |        |      |      |
| HETATM | 4718 | O2 | PRP | 279 | -1.227 | 30.472 | 48.353 | 1.00 | 0.00 |
| O      |      |    |     |     |        |        |        |      |      |
| HETATM | 4719 | H5 | PRP | 279 | -2.086 | 30.519 | 48.779 | 1.00 | 0.00 |
| H      |      |    |     |     |        |        |        |      |      |
| HETATM | 4720 | C3 | PRP | 279 | 0.873  | 29.483 | 48.241 | 1.00 | 0.00 |
| C      |      |    |     |     |        |        |        |      |      |
| HETATM | 4721 | H6 | PRP | 279 | 1.645  | 28.865 | 48.701 | 1.00 | 0.00 |
| H      |      |    |     |     |        |        |        |      |      |
| HETATM | 4722 | H7 | PRP | 279 | 0.449  | 29.087 | 47.318 | 1.00 | 0.00 |
| H      |      |    |     |     |        |        |        |      |      |
| HETATM | 4723 | H8 | PRP | 279 | 1.496  | 30.322 | 47.932 | 1.00 | 0.00 |
| H      |      |    |     |     |        |        |        |      |      |
| HETATM | 4724 | O1 | PRP | 280 | 5.780  | 40.398 | 37.395 | 1.00 | 0.00 |
| O      |      |    |     |     |        |        |        |      |      |
| HETATM | 4725 | H1 | PRP | 280 | 6.269  | 39.689 | 36.969 | 1.00 | 0.00 |
| H      |      |    |     |     |        |        |        |      |      |
| HETATM | 4726 | C1 | PRP | 280 | 4.652  | 39.972 | 38.118 | 1.00 | 0.00 |
| C      |      |    |     |     |        |        |        |      |      |
| HETATM | 4727 | H2 | PRP | 280 | 4.855  | 39.031 | 38.629 | 1.00 | 0.00 |
| H      |      |    |     |     |        |        |        |      |      |
| HETATM | 4728 | H3 | PRP | 280 | 4.307  | 40.733 | 38.819 | 1.00 | 0.00 |
| H      |      |    |     |     |        |        |        |      |      |
| HETATM | 4729 | C2 | PRP | 280 | 3.463  | 39.935 | 37.242 | 1.00 | 0.00 |
| C      |      |    |     |     |        |        |        |      |      |
| HETATM | 4730 | H4 | PRP | 280 | 2.650  | 39.468 | 37.798 | 1.00 | 0.00 |
| H      |      |    |     |     |        |        |        |      |      |
| HETATM | 4731 | O2 | PRP | 280 | 3.677  | 39.119 | 36.130 | 1.00 | 0.00 |
| O      |      |    |     |     |        |        |        |      |      |

|        |      |    |     |     |         |        |        |      |      |
|--------|------|----|-----|-----|---------|--------|--------|------|------|
| HETATM | 4732 | H5 | PRP | 280 | 4.209   | 38.397 | 36.471 | 1.00 | 0.00 |
| H      |      |    |     |     |         |        |        |      |      |
| HETATM | 4733 | C3 | PRP | 280 | 2.816   | 41.353 | 36.847 | 1.00 | 0.00 |
| C      |      |    |     |     |         |        |        |      |      |
| HETATM | 4734 | H6 | PRP | 280 | 2.827   | 42.047 | 37.688 | 1.00 | 0.00 |
| H      |      |    |     |     |         |        |        |      |      |
| HETATM | 4735 | H7 | PRP | 280 | 3.371   | 41.897 | 36.084 | 1.00 | 0.00 |
| H      |      |    |     |     |         |        |        |      |      |
| HETATM | 4736 | H8 | PRP | 280 | 1.796   | 41.146 | 36.522 | 1.00 | 0.00 |
| H      |      |    |     |     |         |        |        |      |      |
| HETATM | 4737 | O1 | PRP | 281 | 9.824   | 46.304 | 42.626 | 1.00 | 0.00 |
| O      |      |    |     |     |         |        |        |      |      |
| HETATM | 4738 | H1 | PRP | 281 | 10.328  | 46.849 | 42.017 | 1.00 | 0.00 |
| H      |      |    |     |     |         |        |        |      |      |
| HETATM | 4739 | C1 | PRP | 281 | 8.454   | 46.505 | 42.394 | 1.00 | 0.00 |
| C      |      |    |     |     |         |        |        |      |      |
| HETATM | 4740 | H2 | PRP | 281 | 8.205   | 47.375 | 41.785 | 1.00 | 0.00 |
| H      |      |    |     |     |         |        |        |      |      |
| HETATM | 4741 | H3 | PRP | 281 | 8.094   | 45.566 | 41.975 | 1.00 | 0.00 |
| H      |      |    |     |     |         |        |        |      |      |
| HETATM | 4742 | C2 | PRP | 281 | 7.666   | 46.714 | 43.702 | 1.00 | 0.00 |
| C      |      |    |     |     |         |        |        |      |      |
| HETATM | 4743 | H4 | PRP | 281 | 7.950   | 47.705 | 44.058 | 1.00 | 0.00 |
| H      |      |    |     |     |         |        |        |      |      |
| HETATM | 4744 | O2 | PRP | 281 | 8.073   | 45.748 | 44.615 | 1.00 | 0.00 |
| O      |      |    |     |     |         |        |        |      |      |
| HETATM | 4745 | H5 | PRP | 281 | 8.976   | 45.458 | 44.466 | 1.00 | 0.00 |
| H      |      |    |     |     |         |        |        |      |      |
| HETATM | 4746 | C3 | PRP | 281 | 6.125   | 46.719 | 43.443 | 1.00 | 0.00 |
| C      |      |    |     |     |         |        |        |      |      |
| HETATM | 4747 | H6 | PRP | 281 | 5.647   | 46.620 | 44.418 | 1.00 | 0.00 |
| H      |      |    |     |     |         |        |        |      |      |
| HETATM | 4748 | H7 | PRP | 281 | 5.890   | 47.695 | 43.019 | 1.00 | 0.00 |
| H      |      |    |     |     |         |        |        |      |      |
| HETATM | 4749 | H8 | PRP | 281 | 5.849   | 45.898 | 42.780 | 1.00 | 0.00 |
| H      |      |    |     |     |         |        |        |      |      |
| HETATM | 4750 | O1 | PRP | 282 | -10.761 | 40.225 | 40.812 | 1.00 | 0.00 |
| O      |      |    |     |     |         |        |        |      |      |
| HETATM | 4751 | H1 | PRP | 282 | -11.070 | 39.319 | 40.885 | 1.00 | 0.00 |
| H      |      |    |     |     |         |        |        |      |      |
| HETATM | 4752 | C1 | PRP | 282 | -10.342 | 40.364 | 39.495 | 1.00 | 0.00 |
| C      |      |    |     |     |         |        |        |      |      |
| HETATM | 4753 | H2 | PRP | 282 | -10.823 | 39.556 | 38.944 | 1.00 | 0.00 |
| H      |      |    |     |     |         |        |        |      |      |
| HETATM | 4754 | H3 | PRP | 282 | -10.849 | 41.270 | 39.162 | 1.00 | 0.00 |
| H      |      |    |     |     |         |        |        |      |      |
| HETATM | 4755 | C2 | PRP | 282 | -8.876  | 40.522 | 39.251 | 1.00 | 0.00 |
| C      |      |    |     |     |         |        |        |      |      |
| HETATM | 4756 | H4 | PRP | 282 | -8.603  | 40.722 | 38.216 | 1.00 | 0.00 |
| H      |      |    |     |     |         |        |        |      |      |
| HETATM | 4757 | O2 | PRP | 282 | -8.173  | 39.346 | 39.608 | 1.00 | 0.00 |
| O      |      |    |     |     |         |        |        |      |      |
| HETATM | 4758 | H5 | PRP | 282 | -8.198  | 39.373 | 40.567 | 1.00 | 0.00 |
| H      |      |    |     |     |         |        |        |      |      |
| HETATM | 4759 | C3 | PRP | 282 | -8.288  | 41.674 | 40.149 | 1.00 | 0.00 |
| C      |      |    |     |     |         |        |        |      |      |

|        |      |    |     |     |         |        |        |      |      |
|--------|------|----|-----|-----|---------|--------|--------|------|------|
| HETATM | 4760 | H6 | PRP | 282 | -8.365  | 41.399 | 41.201 | 1.00 | 0.00 |
| H      |      |    |     |     |         |        |        |      |      |
| HETATM | 4761 | H7 | PRP | 282 | -7.244  | 41.891 | 39.925 | 1.00 | 0.00 |
| H      |      |    |     |     |         |        |        |      |      |
| HETATM | 4762 | H8 | PRP | 282 | -8.870  | 42.529 | 39.806 | 1.00 | 0.00 |
| H      |      |    |     |     |         |        |        |      |      |
| HETATM | 4763 | O1 | PRP | 283 | -13.665 | 33.152 | 35.921 | 1.00 | 0.00 |
| O      |      |    |     |     |         |        |        |      |      |
| HETATM | 4764 | H1 | PRP | 283 | -13.585 | 33.124 | 34.965 | 1.00 | 0.00 |
| H      |      |    |     |     |         |        |        |      |      |
| HETATM | 4765 | C1 | PRP | 283 | -12.488 | 33.474 | 36.560 | 1.00 | 0.00 |
| C      |      |    |     |     |         |        |        |      |      |
| HETATM | 4766 | H2 | PRP | 283 | -12.305 | 34.542 | 36.447 | 1.00 | 0.00 |
| H      |      |    |     |     |         |        |        |      |      |
| HETATM | 4767 | H3 | PRP | 283 | -12.528 | 33.204 | 37.615 | 1.00 | 0.00 |
| H      |      |    |     |     |         |        |        |      |      |
| HETATM | 4768 | C2 | PRP | 283 | -11.379 | 32.623 | 35.992 | 1.00 | 0.00 |
| C      |      |    |     |     |         |        |        |      |      |
| HETATM | 4769 | H4 | PRP | 283 | -10.604 | 32.531 | 36.753 | 1.00 | 0.00 |
| H      |      |    |     |     |         |        |        |      |      |
| HETATM | 4770 | O2 | PRP | 283 | -10.917 | 33.253 | 34.794 | 1.00 | 0.00 |
| O      |      |    |     |     |         |        |        |      |      |
| HETATM | 4771 | H5 | PRP | 283 | -10.619 | 34.135 | 35.030 | 1.00 | 0.00 |
| H      |      |    |     |     |         |        |        |      |      |
| HETATM | 4772 | C3 | PRP | 283 | -11.792 | 31.178 | 35.598 | 1.00 | 0.00 |
| C      |      |    |     |     |         |        |        |      |      |
| HETATM | 4773 | H6 | PRP | 283 | -12.411 | 30.810 | 36.415 | 1.00 | 0.00 |
| H      |      |    |     |     |         |        |        |      |      |
| HETATM | 4774 | H7 | PRP | 283 | -12.121 | 31.189 | 34.559 | 1.00 | 0.00 |
| H      |      |    |     |     |         |        |        |      |      |
| HETATM | 4775 | H8 | PRP | 283 | -10.819 | 30.691 | 35.669 | 1.00 | 0.00 |
| H      |      |    |     |     |         |        |        |      |      |
| HETATM | 4776 | O1 | PRP | 284 | -6.685  | 38.739 | 51.962 | 1.00 | 0.00 |
| O      |      |    |     |     |         |        |        |      |      |
| HETATM | 4777 | H1 | PRP | 284 | -7.221  | 38.271 | 52.607 | 1.00 | 0.00 |
| H      |      |    |     |     |         |        |        |      |      |
| HETATM | 4778 | C1 | PRP | 284 | -6.814  | 38.229 | 50.646 | 1.00 | 0.00 |
| C      |      |    |     |     |         |        |        |      |      |
| HETATM | 4779 | H2 | PRP | 284 | -6.474  | 38.966 | 49.919 | 1.00 | 0.00 |
| H      |      |    |     |     |         |        |        |      |      |
| HETATM | 4780 | H3 | PRP | 284 | -6.277  | 37.281 | 50.629 | 1.00 | 0.00 |
| H      |      |    |     |     |         |        |        |      |      |
| HETATM | 4781 | C2 | PRP | 284 | -8.306  | 37.946 | 50.220 | 1.00 | 0.00 |
| C      |      |    |     |     |         |        |        |      |      |
| HETATM | 4782 | H4 | PRP | 284 | -8.907  | 38.813 | 50.493 | 1.00 | 0.00 |
| H      |      |    |     |     |         |        |        |      |      |
| HETATM | 4783 | O2 | PRP | 284 | -8.861  | 36.898 | 50.896 | 1.00 | 0.00 |
| O      |      |    |     |     |         |        |        |      |      |
| HETATM | 4784 | H5 | PRP | 284 | -9.671  | 36.694 | 50.423 | 1.00 | 0.00 |
| H      |      |    |     |     |         |        |        |      |      |
| HETATM | 4785 | C3 | PRP | 284 | -8.254  | 37.860 | 48.736 | 1.00 | 0.00 |
| C      |      |    |     |     |         |        |        |      |      |
| HETATM | 4786 | H6 | PRP | 284 | -7.793  | 38.803 | 48.441 | 1.00 | 0.00 |
| H      |      |    |     |     |         |        |        |      |      |
| HETATM | 4787 | H7 | PRP | 284 | -7.713  | 37.019 | 48.302 | 1.00 | 0.00 |
| H      |      |    |     |     |         |        |        |      |      |

|        |      |    |     |     |        |        |        |      |      |
|--------|------|----|-----|-----|--------|--------|--------|------|------|
| HETATM | 4788 | H8 | PRP | 284 | -9.284 | 37.830 | 48.380 | 1.00 | 0.00 |
| H      |      |    |     |     |        |        |        |      |      |
| HETATM | 4789 | O1 | PRP | 285 | 2.149  | 44.732 | 41.252 | 1.00 | 0.00 |
| O      |      |    |     |     |        |        |        |      |      |
| HETATM | 4790 | H1 | PRP | 285 | 2.251  | 45.043 | 42.154 | 1.00 | 0.00 |
| H      |      |    |     |     |        |        |        |      |      |
| HETATM | 4791 | C1 | PRP | 285 | 0.754  | 44.907 | 40.938 | 1.00 | 0.00 |
| C      |      |    |     |     |        |        |        |      |      |
| HETATM | 4792 | H2 | PRP | 285 | 0.188  | 44.125 | 41.444 | 1.00 | 0.00 |
| H      |      |    |     |     |        |        |        |      |      |
| HETATM | 4793 | H3 | PRP | 285 | 0.385  | 45.920 | 41.104 | 1.00 | 0.00 |
| H      |      |    |     |     |        |        |        |      |      |
| HETATM | 4794 | C2 | PRP | 285 | 0.458  | 44.686 | 39.471 | 1.00 | 0.00 |
| C      |      |    |     |     |        |        |        |      |      |
| HETATM | 4795 | H4 | PRP | 285 | 1.044  | 43.831 | 39.134 | 1.00 | 0.00 |
| H      |      |    |     |     |        |        |        |      |      |
| HETATM | 4796 | O2 | PRP | 285 | 0.838  | 45.895 | 38.818 | 1.00 | 0.00 |
| O      |      |    |     |     |        |        |        |      |      |
| HETATM | 4797 | H5 | PRP | 285 | 1.673  | 46.187 | 39.190 | 1.00 | 0.00 |
| H      |      |    |     |     |        |        |        |      |      |
| HETATM | 4798 | C3 | PRP | 285 | -0.987 | 44.465 | 39.185 | 1.00 | 0.00 |
| C      |      |    |     |     |        |        |        |      |      |
| HETATM | 4799 | H6 | PRP | 285 | -1.285 | 43.561 | 39.715 | 1.00 | 0.00 |
| H      |      |    |     |     |        |        |        |      |      |
| HETATM | 4800 | H7 | PRP | 285 | -1.561 | 45.359 | 39.432 | 1.00 | 0.00 |
| H      |      |    |     |     |        |        |        |      |      |
| HETATM | 4801 | H8 | PRP | 285 | -1.147 | 44.256 | 38.128 | 1.00 | 0.00 |
| H      |      |    |     |     |        |        |        |      |      |
| HETATM | 4802 | O1 | PRP | 286 | -5.135 | 45.152 | 39.600 | 1.00 | 0.00 |
| O      |      |    |     |     |        |        |        |      |      |
| HETATM | 4803 | H1 | PRP | 286 | -4.696 | 45.436 | 38.795 | 1.00 | 0.00 |
| H      |      |    |     |     |        |        |        |      |      |
| HETATM | 4804 | C1 | PRP | 286 | -4.622 | 43.925 | 40.053 | 1.00 | 0.00 |
| C      |      |    |     |     |        |        |        |      |      |
| HETATM | 4805 | H2 | PRP | 286 | -5.312 | 43.173 | 39.668 | 1.00 | 0.00 |
| H      |      |    |     |     |        |        |        |      |      |
| HETATM | 4806 | H3 | PRP | 286 | -3.703 | 43.715 | 39.506 | 1.00 | 0.00 |
| H      |      |    |     |     |        |        |        |      |      |
| HETATM | 4807 | C2 | PRP | 286 | -4.493 | 43.941 | 41.567 | 1.00 | 0.00 |
| C      |      |    |     |     |        |        |        |      |      |
| HETATM | 4808 | H4 | PRP | 286 | -5.304 | 44.534 | 41.989 | 1.00 | 0.00 |
| H      |      |    |     |     |        |        |        |      |      |
| HETATM | 4809 | O2 | PRP | 286 | -3.286 | 44.602 | 41.955 | 1.00 | 0.00 |
| O      |      |    |     |     |        |        |        |      |      |
| HETATM | 4810 | H5 | PRP | 286 | -3.368 | 45.392 | 41.415 | 1.00 | 0.00 |
| H      |      |    |     |     |        |        |        |      |      |
| HETATM | 4811 | C3 | PRP | 286 | -4.628 | 42.627 | 42.320 | 1.00 | 0.00 |
| C      |      |    |     |     |        |        |        |      |      |
| HETATM | 4812 | H6 | PRP | 286 | -5.619 | 42.186 | 42.215 | 1.00 | 0.00 |
| H      |      |    |     |     |        |        |        |      |      |
| HETATM | 4813 | H7 | PRP | 286 | -3.921 | 41.923 | 41.881 | 1.00 | 0.00 |
| H      |      |    |     |     |        |        |        |      |      |
| HETATM | 4814 | H8 | PRP | 286 | -4.439 | 42.932 | 43.349 | 1.00 | 0.00 |
| H      |      |    |     |     |        |        |        |      |      |
| HETATM | 4815 | O1 | PRP | 287 | 2.721  | 46.540 | 43.437 | 1.00 | 0.00 |
| O      |      |    |     |     |        |        |        |      |      |

|        |      |    |     |     |        |        |        |      |      |
|--------|------|----|-----|-----|--------|--------|--------|------|------|
| HETATM | 4816 | H1 | PRP | 287 | 3.171  | 46.329 | 44.258 | 1.00 | 0.00 |
| H      |      |    |     |     |        |        |        |      |      |
| HETATM | 4817 | C1 | PRP | 287 | 1.450  | 46.760 | 43.968 | 1.00 | 0.00 |
| C      |      |    |     |     |        |        |        |      |      |
| HETATM | 4818 | H2 | PRP | 287 | 1.469  | 47.835 | 44.145 | 1.00 | 0.00 |
| H      |      |    |     |     |        |        |        |      |      |
| HETATM | 4819 | H3 | PRP | 287 | 0.707  | 46.442 | 43.237 | 1.00 | 0.00 |
| H      |      |    |     |     |        |        |        |      |      |
| HETATM | 4820 | C2 | PRP | 287 | 1.448  | 45.946 | 45.317 | 1.00 | 0.00 |
| C      |      |    |     |     |        |        |        |      |      |
| HETATM | 4821 | H4 | PRP | 287 | 0.437  | 45.921 | 45.725 | 1.00 | 0.00 |
| H      |      |    |     |     |        |        |        |      |      |
| HETATM | 4822 | O2 | PRP | 287 | 2.247  | 46.656 | 46.261 | 1.00 | 0.00 |
| O      |      |    |     |     |        |        |        |      |      |
| HETATM | 4823 | H5 | PRP | 287 | 1.771  | 47.314 | 46.773 | 1.00 | 0.00 |
| H      |      |    |     |     |        |        |        |      |      |
| HETATM | 4824 | C3 | PRP | 287 | 1.911  | 44.531 | 45.217 | 1.00 | 0.00 |
| C      |      |    |     |     |        |        |        |      |      |
| HETATM | 4825 | H6 | PRP | 287 | 2.975  | 44.571 | 44.982 | 1.00 | 0.00 |
| H      |      |    |     |     |        |        |        |      |      |
| HETATM | 4826 | H7 | PRP | 287 | 1.768  | 44.082 | 46.199 | 1.00 | 0.00 |
| H      |      |    |     |     |        |        |        |      |      |
| HETATM | 4827 | H8 | PRP | 287 | 1.371  | 43.935 | 44.481 | 1.00 | 0.00 |
| H      |      |    |     |     |        |        |        |      |      |
| HETATM | 4828 | O1 | PRP | 288 | 9.029  | 52.256 | 24.005 | 1.00 | 0.00 |
| O      |      |    |     |     |        |        |        |      |      |
| HETATM | 4829 | H1 | PRP | 288 | 9.534  | 51.451 | 24.145 | 1.00 | 0.00 |
| H      |      |    |     |     |        |        |        |      |      |
| HETATM | 4830 | C1 | PRP | 288 | 9.481  | 52.852 | 22.839 | 1.00 | 0.00 |
| C      |      |    |     |     |        |        |        |      |      |
| HETATM | 4831 | H2 | PRP | 288 | 9.110  | 53.877 | 22.855 | 1.00 | 0.00 |
| H      |      |    |     |     |        |        |        |      |      |
| HETATM | 4832 | H3 | PRP | 288 | 10.567 | 52.943 | 22.822 | 1.00 | 0.00 |
| H      |      |    |     |     |        |        |        |      |      |
| HETATM | 4833 | C2 | PRP | 288 | 9.003  | 52.228 | 21.541 | 1.00 | 0.00 |
| C      |      |    |     |     |        |        |        |      |      |
| HETATM | 4834 | H4 | PRP | 288 | 9.099  | 52.985 | 20.763 | 1.00 | 0.00 |
| H      |      |    |     |     |        |        |        |      |      |
| HETATM | 4835 | O2 | PRP | 288 | 7.649  | 51.829 | 21.590 | 1.00 | 0.00 |
| O      |      |    |     |     |        |        |        |      |      |
| HETATM | 4836 | H5 | PRP | 288 | 7.555  | 51.357 | 22.420 | 1.00 | 0.00 |
| H      |      |    |     |     |        |        |        |      |      |
| HETATM | 4837 | C3 | PRP | 288 | 9.871  | 51.034 | 21.134 | 1.00 | 0.00 |
| C      |      |    |     |     |        |        |        |      |      |
| HETATM | 4838 | H6 | PRP | 288 | 9.461  | 50.161 | 21.641 | 1.00 | 0.00 |
| H      |      |    |     |     |        |        |        |      |      |
| HETATM | 4839 | H7 | PRP | 288 | 9.931  | 50.800 | 20.071 | 1.00 | 0.00 |
| H      |      |    |     |     |        |        |        |      |      |
| HETATM | 4840 | H8 | PRP | 288 | 10.866 | 51.293 | 21.495 | 1.00 | 0.00 |
| H      |      |    |     |     |        |        |        |      |      |
| HETATM | 4841 | O1 | PRP | 289 | 0.866  | 40.449 | 53.816 | 1.00 | 0.00 |
| O      |      |    |     |     |        |        |        |      |      |
| HETATM | 4842 | H1 | PRP | 289 | 0.176  | 41.054 | 54.098 | 1.00 | 0.00 |
| H      |      |    |     |     |        |        |        |      |      |
| HETATM | 4843 | C1 | PRP | 289 | 0.973  | 40.525 | 52.377 | 1.00 | 0.00 |
| C      |      |    |     |     |        |        |        |      |      |



|        |      |    |     |     |         |        |        |      |      |
|--------|------|----|-----|-----|---------|--------|--------|------|------|
| HETATM | 4844 | H2 | PRP | 289 | -0.044  | 40.624 | 51.995 | 1.00 | 0.00 |
| H      |      |    |     |     |         |        |        |      |      |
| HETATM | 4845 | H3 | PRP | 289 | 1.603   | 41.391 | 52.173 | 1.00 | 0.00 |
| H      |      |    |     |     |         |        |        |      |      |
| HETATM | 4846 | C2 | PRP | 289 | 1.559   | 39.287 | 51.778 | 1.00 | 0.00 |
| C      |      |    |     |     |         |        |        |      |      |
| HETATM | 4847 | H4 | PRP | 289 | 1.491   | 39.526 | 50.717 | 1.00 | 0.00 |
| H      |      |    |     |     |         |        |        |      |      |
| HETATM | 4848 | O2 | PRP | 289 | 0.794   | 38.074 | 52.045 | 1.00 | 0.00 |
| O      |      |    |     |     |         |        |        |      |      |
| HETATM | 4849 | H5 | PRP | 289 | 0.710   | 37.982 | 52.997 | 1.00 | 0.00 |
| H      |      |    |     |     |         |        |        |      |      |
| HETATM | 4850 | C3 | PRP | 289 | 3.083   | 39.178 | 52.090 | 1.00 | 0.00 |
| C      |      |    |     |     |         |        |        |      |      |
| HETATM | 4851 | H6 | PRP | 289 | 3.602   | 38.323 | 51.658 | 1.00 | 0.00 |
| H      |      |    |     |     |         |        |        |      |      |
| HETATM | 4852 | H7 | PRP | 289 | 3.637   | 40.087 | 51.854 | 1.00 | 0.00 |
| H      |      |    |     |     |         |        |        |      |      |
| HETATM | 4853 | H8 | PRP | 289 | 3.172   | 39.111 | 53.174 | 1.00 | 0.00 |
| H      |      |    |     |     |         |        |        |      |      |
| HETATM | 4854 | O1 | PRP | 290 | 6.916   | 28.269 | 44.112 | 1.00 | 0.00 |
| O      |      |    |     |     |         |        |        |      |      |
| HETATM | 4855 | H1 | PRP | 290 | 6.275   | 27.595 | 43.871 | 1.00 | 0.00 |
| H      |      |    |     |     |         |        |        |      |      |
| HETATM | 4856 | C1 | PRP | 290 | 6.738   | 28.612 | 45.384 | 1.00 | 0.00 |
| C      |      |    |     |     |         |        |        |      |      |
| HETATM | 4857 | H2 | PRP | 290 | 6.187   | 29.553 | 45.414 | 1.00 | 0.00 |
| H      |      |    |     |     |         |        |        |      |      |
| HETATM | 4858 | H3 | PRP | 290 | 6.403   | 27.706 | 45.888 | 1.00 | 0.00 |
| H      |      |    |     |     |         |        |        |      |      |
| HETATM | 4859 | C2 | PRP | 290 | 8.171   | 28.846 | 45.913 | 1.00 | 0.00 |
| C      |      |    |     |     |         |        |        |      |      |
| HETATM | 4860 | H4 | PRP | 290 | 8.790   | 29.334 | 45.160 | 1.00 | 0.00 |
| H      |      |    |     |     |         |        |        |      |      |
| HETATM | 4861 | O2 | PRP | 290 | 8.676   | 27.558 | 46.237 | 1.00 | 0.00 |
| O      |      |    |     |     |         |        |        |      |      |
| HETATM | 4862 | H5 | PRP | 290 | 9.287   | 27.281 | 45.551 | 1.00 | 0.00 |
| H      |      |    |     |     |         |        |        |      |      |
| HETATM | 4863 | C3 | PRP | 290 | 8.355   | 29.722 | 47.204 | 1.00 | 0.00 |
| C      |      |    |     |     |         |        |        |      |      |
| HETATM | 4864 | H6 | PRP | 290 | 7.770   | 29.239 | 47.986 | 1.00 | 0.00 |
| H      |      |    |     |     |         |        |        |      |      |
| HETATM | 4865 | H7 | PRP | 290 | 9.425   | 29.802 | 47.398 | 1.00 | 0.00 |
| H      |      |    |     |     |         |        |        |      |      |
| HETATM | 4866 | H8 | PRP | 290 | 8.064   | 30.733 | 46.920 | 1.00 | 0.00 |
| H      |      |    |     |     |         |        |        |      |      |
| HETATM | 4867 | O1 | PRP | 291 | -10.081 | 41.106 | 43.294 | 1.00 | 0.00 |
| O      |      |    |     |     |         |        |        |      |      |
| HETATM | 4868 | H1 | PRP | 291 | -10.588 | 40.852 | 42.519 | 1.00 | 0.00 |
| H      |      |    |     |     |         |        |        |      |      |
| HETATM | 4869 | C1 | PRP | 291 | -9.818  | 42.471 | 43.413 | 1.00 | 0.00 |
| C      |      |    |     |     |         |        |        |      |      |
| HETATM | 4870 | H2 | PRP | 291 | -9.681  | 43.016 | 42.479 | 1.00 | 0.00 |
| H      |      |    |     |     |         |        |        |      |      |
| HETATM | 4871 | H3 | PRP | 291 | -10.658 | 43.004 | 43.859 | 1.00 | 0.00 |
| H      |      |    |     |     |         |        |        |      |      |

|        |      |    |     |     |        |        |        |      |      |
|--------|------|----|-----|-----|--------|--------|--------|------|------|
| HETATM | 4872 | C2 | PRP | 291 | -8.539 | 42.553 | 44.301 | 1.00 | 0.00 |
| C      |      |    |     |     |        |        |        |      |      |
| HETATM | 4873 | H4 | PRP | 291 | -7.729 | 41.963 | 43.872 | 1.00 | 0.00 |
| H      |      |    |     |     |        |        |        |      |      |
| HETATM | 4874 | O2 | PRP | 291 | -8.791 | 42.074 | 45.576 | 1.00 | 0.00 |
| O      |      |    |     |     |        |        |        |      |      |
| HETATM | 4875 | H5 | PRP | 291 | -9.691 | 42.200 | 45.884 | 1.00 | 0.00 |
| H      |      |    |     |     |        |        |        |      |      |
| HETATM | 4876 | C3 | PRP | 291 | -8.008 | 43.980 | 44.445 | 1.00 | 0.00 |
| C      |      |    |     |     |        |        |        |      |      |
| HETATM | 4877 | H6 | PRP | 291 | -8.144 | 44.516 | 43.506 | 1.00 | 0.00 |
| H      |      |    |     |     |        |        |        |      |      |
| HETATM | 4878 | H7 | PRP | 291 | -8.517 | 44.546 | 45.226 | 1.00 | 0.00 |
| H      |      |    |     |     |        |        |        |      |      |
| HETATM | 4879 | H8 | PRP | 291 | -6.926 | 43.935 | 44.565 | 1.00 | 0.00 |
| H      |      |    |     |     |        |        |        |      |      |
| HETATM | 4880 | O1 | PRP | 292 | 1.510  | 48.905 | 47.675 | 1.00 | 0.00 |
| O      |      |    |     |     |        |        |        |      |      |
| HETATM | 4881 | H1 | PRP | 292 | 1.539  | 49.078 | 48.619 | 1.00 | 0.00 |
| H      |      |    |     |     |        |        |        |      |      |
| HETATM | 4882 | C1 | PRP | 292 | 0.996  | 50.103 | 47.041 | 1.00 | 0.00 |
| C      |      |    |     |     |        |        |        |      |      |
| HETATM | 4883 | H2 | PRP | 292 | 1.336  | 51.010 | 47.540 | 1.00 | 0.00 |
| H      |      |    |     |     |        |        |        |      |      |
| HETATM | 4884 | H3 | PRP | 292 | 1.198  | 50.208 | 45.975 | 1.00 | 0.00 |
| H      |      |    |     |     |        |        |        |      |      |
| HETATM | 4885 | C2 | PRP | 292 | -0.531 | 50.127 | 47.248 | 1.00 | 0.00 |
| C      |      |    |     |     |        |        |        |      |      |
| HETATM | 4886 | H4 | PRP | 292 | -0.837 | 50.944 | 46.595 | 1.00 | 0.00 |
| H      |      |    |     |     |        |        |        |      |      |
| HETATM | 4887 | O2 | PRP | 292 | -0.949 | 50.301 | 48.607 | 1.00 | 0.00 |
| O      |      |    |     |     |        |        |        |      |      |
| HETATM | 4888 | H5 | PRP | 292 | -1.853 | 50.624 | 48.596 | 1.00 | 0.00 |
| H      |      |    |     |     |        |        |        |      |      |
| HETATM | 4889 | C3 | PRP | 292 | -1.365 | 48.928 | 46.675 | 1.00 | 0.00 |
| C      |      |    |     |     |        |        |        |      |      |
| HETATM | 4890 | H6 | PRP | 292 | -1.024 | 48.035 | 47.200 | 1.00 | 0.00 |
| H      |      |    |     |     |        |        |        |      |      |
| HETATM | 4891 | H7 | PRP | 292 | -2.451 | 49.017 | 46.714 | 1.00 | 0.00 |
| H      |      |    |     |     |        |        |        |      |      |
| HETATM | 4892 | H8 | PRP | 292 | -1.094 | 48.732 | 45.638 | 1.00 | 0.00 |
| H      |      |    |     |     |        |        |        |      |      |
| HETATM | 4893 | O1 | PRP | 293 | 13.962 | 56.212 | 33.885 | 1.00 | 0.00 |
| O      |      |    |     |     |        |        |        |      |      |
| HETATM | 4894 | H1 | PRP | 293 | 14.175 | 56.411 | 34.800 | 1.00 | 0.00 |
| H      |      |    |     |     |        |        |        |      |      |
| HETATM | 4895 | C1 | PRP | 293 | 12.823 | 55.407 | 33.831 | 1.00 | 0.00 |
| C      |      |    |     |     |        |        |        |      |      |
| HETATM | 4896 | H2 | PRP | 293 | 12.771 | 54.603 | 34.565 | 1.00 | 0.00 |
| H      |      |    |     |     |        |        |        |      |      |
| HETATM | 4897 | H3 | PRP | 293 | 11.945 | 55.978 | 34.133 | 1.00 | 0.00 |
| H      |      |    |     |     |        |        |        |      |      |
| HETATM | 4898 | C2 | PRP | 293 | 12.437 | 54.999 | 32.403 | 1.00 | 0.00 |
| C      |      |    |     |     |        |        |        |      |      |
| HETATM | 4899 | H4 | PRP | 293 | 11.404 | 54.665 | 32.499 | 1.00 | 0.00 |
| H      |      |    |     |     |        |        |        |      |      |

|        |      |    |     |     |        |        |        |      |      |
|--------|------|----|-----|-----|--------|--------|--------|------|------|
| HETATM | 4900 | O2 | PRP | 293 | 13.216 | 53.928 | 31.902 | 1.00 | 0.00 |
| O      |      |    |     |     |        |        |        |      |      |
| HETATM | 4901 | H5 | PRP | 293 | 13.027 | 53.218 | 32.521 | 1.00 | 0.00 |
| H      |      |    |     |     |        |        |        |      |      |
| HETATM | 4902 | C3 | PRP | 293 | 12.466 | 56.042 | 31.332 | 1.00 | 0.00 |
| C      |      |    |     |     |        |        |        |      |      |
| HETATM | 4903 | H6 | PRP | 293 | 11.669 | 56.740 | 31.588 | 1.00 | 0.00 |
| H      |      |    |     |     |        |        |        |      |      |
| HETATM | 4904 | H7 | PRP | 293 | 13.455 | 56.494 | 31.253 | 1.00 | 0.00 |
| H      |      |    |     |     |        |        |        |      |      |
| HETATM | 4905 | H8 | PRP | 293 | 12.294 | 55.738 | 30.300 | 1.00 | 0.00 |
| H      |      |    |     |     |        |        |        |      |      |
| HETATM | 4906 | O1 | PRP | 294 | 11.692 | 43.691 | 39.705 | 1.00 | 0.00 |
| O      |      |    |     |     |        |        |        |      |      |
| HETATM | 4907 | H1 | PRP | 294 | 12.490 | 43.706 | 39.171 | 1.00 | 0.00 |
| H      |      |    |     |     |        |        |        |      |      |
| HETATM | 4908 | C1 | PRP | 294 | 10.608 | 43.385 | 38.842 | 1.00 | 0.00 |
| C      |      |    |     |     |        |        |        |      |      |
| HETATM | 4909 | H2 | PRP | 294 | 10.637 | 42.314 | 38.641 | 1.00 | 0.00 |
| H      |      |    |     |     |        |        |        |      |      |
| HETATM | 4910 | H3 | PRP | 294 | 9.688  | 43.695 | 39.338 | 1.00 | 0.00 |
| H      |      |    |     |     |        |        |        |      |      |
| HETATM | 4911 | C2 | PRP | 294 | 10.742 | 44.045 | 37.495 | 1.00 | 0.00 |
| C      |      |    |     |     |        |        |        |      |      |
| HETATM | 4912 | H4 | PRP | 294 | 9.867  | 43.757 | 36.912 | 1.00 | 0.00 |
| H      |      |    |     |     |        |        |        |      |      |
| HETATM | 4913 | O2 | PRP | 294 | 11.902 | 43.616 | 36.830 | 1.00 | 0.00 |
| O      |      |    |     |     |        |        |        |      |      |
| HETATM | 4914 | H5 | PRP | 294 | 12.009 | 42.668 | 36.939 | 1.00 | 0.00 |
| H      |      |    |     |     |        |        |        |      |      |
| HETATM | 4915 | C3 | PRP | 294 | 10.750 | 45.556 | 37.689 | 1.00 | 0.00 |
| C      |      |    |     |     |        |        |        |      |      |
| HETATM | 4916 | H6 | PRP | 294 | 9.733  | 45.825 | 37.974 | 1.00 | 0.00 |
| H      |      |    |     |     |        |        |        |      |      |
| HETATM | 4917 | H7 | PRP | 294 | 11.529 | 45.922 | 38.357 | 1.00 | 0.00 |
| H      |      |    |     |     |        |        |        |      |      |
| HETATM | 4918 | H8 | PRP | 294 | 11.044 | 46.107 | 36.796 | 1.00 | 0.00 |
| H      |      |    |     |     |        |        |        |      |      |
| HETATM | 4919 | O1 | PRP | 295 | 6.206  | 40.979 | 18.056 | 1.00 | 0.00 |
| O      |      |    |     |     |        |        |        |      |      |
| HETATM | 4920 | H1 | PRP | 295 | 6.432  | 41.904 | 17.935 | 1.00 | 0.00 |
| H      |      |    |     |     |        |        |        |      |      |
| HETATM | 4921 | C1 | PRP | 295 | 6.502  | 40.675 | 19.371 | 1.00 | 0.00 |
| C      |      |    |     |     |        |        |        |      |      |
| HETATM | 4922 | H2 | PRP | 295 | 7.581  | 40.757 | 19.503 | 1.00 | 0.00 |
| H      |      |    |     |     |        |        |        |      |      |
| HETATM | 4923 | H3 | PRP | 295 | 5.878  | 41.305 | 20.004 | 1.00 | 0.00 |
| H      |      |    |     |     |        |        |        |      |      |
| HETATM | 4924 | C2 | PRP | 295 | 6.077  | 39.205 | 19.726 | 1.00 | 0.00 |
| C      |      |    |     |     |        |        |        |      |      |
| HETATM | 4925 | H4 | PRP | 295 | 6.401  | 38.950 | 20.736 | 1.00 | 0.00 |
| H      |      |    |     |     |        |        |        |      |      |
| HETATM | 4926 | O2 | PRP | 295 | 6.828  | 38.352 | 18.889 | 1.00 | 0.00 |
| O      |      |    |     |     |        |        |        |      |      |
| HETATM | 4927 | H5 | PRP | 295 | 6.862  | 38.727 | 18.006 | 1.00 | 0.00 |
| H      |      |    |     |     |        |        |        |      |      |

|        |      |    |     |     |       |        |        |      |      |
|--------|------|----|-----|-----|-------|--------|--------|------|------|
| HETATM | 4928 | C3 | PRP | 295 | 4.634 | 38.875 | 19.429 | 1.00 | 0.00 |
| C      |      |    |     |     |       |        |        |      |      |
| HETATM | 4929 | H6 | PRP | 295 | 4.425 | 37.846 | 19.722 | 1.00 | 0.00 |
| H      |      |    |     |     |       |        |        |      |      |
| HETATM | 4930 | H7 | PRP | 295 | 3.969 | 39.540 | 19.981 | 1.00 | 0.00 |
| H      |      |    |     |     |       |        |        |      |      |
| HETATM | 4931 | H8 | PRP | 295 | 4.520 | 38.842 | 18.345 | 1.00 | 0.00 |
| H      |      |    |     |     |       |        |        |      |      |
| HETATM | 4932 | O1 | PRP | 296 | 3.453 | 27.337 | 30.729 | 1.00 | 0.00 |
| O      |      |    |     |     |       |        |        |      |      |
| HETATM | 4933 | H1 | PRP | 296 | 2.828 | 26.765 | 30.277 | 1.00 | 0.00 |
| H      |      |    |     |     |       |        |        |      |      |
| HETATM | 4934 | C1 | PRP | 296 | 4.624 | 27.200 | 30.023 | 1.00 | 0.00 |
| C      |      |    |     |     |       |        |        |      |      |
| HETATM | 4935 | H2 | PRP | 296 | 4.425 | 27.642 | 29.047 | 1.00 | 0.00 |
| H      |      |    |     |     |       |        |        |      |      |
| HETATM | 4936 | H3 | PRP | 296 | 5.421 | 27.678 | 30.592 | 1.00 | 0.00 |
| H      |      |    |     |     |       |        |        |      |      |
| HETATM | 4937 | C2 | PRP | 296 | 4.725 | 25.711 | 29.636 | 1.00 | 0.00 |
| C      |      |    |     |     |       |        |        |      |      |
| HETATM | 4938 | H4 | PRP | 296 | 5.649 | 25.491 | 29.101 | 1.00 | 0.00 |
| H      |      |    |     |     |       |        |        |      |      |
| HETATM | 4939 | O2 | PRP | 296 | 3.558 | 25.316 | 28.956 | 1.00 | 0.00 |
| O      |      |    |     |     |       |        |        |      |      |
| HETATM | 4940 | H5 | PRP | 296 | 3.664 | 24.445 | 28.566 | 1.00 | 0.00 |
| H      |      |    |     |     |       |        |        |      |      |
| HETATM | 4941 | C3 | PRP | 296 | 4.998 | 24.918 | 30.843 | 1.00 | 0.00 |
| C      |      |    |     |     |       |        |        |      |      |
| HETATM | 4942 | H6 | PRP | 296 | 4.166 | 25.090 | 31.525 | 1.00 | 0.00 |
| H      |      |    |     |     |       |        |        |      |      |
| HETATM | 4943 | H7 | PRP | 296 | 5.183 | 23.854 | 30.696 | 1.00 | 0.00 |
| H      |      |    |     |     |       |        |        |      |      |
| HETATM | 4944 | H8 | PRP | 296 | 5.845 | 25.326 | 31.395 | 1.00 | 0.00 |
| H      |      |    |     |     |       |        |        |      |      |
| HETATM | 4945 | O1 | PRP | 297 | 5.369 | 30.518 | 31.703 | 1.00 | 0.00 |
| O      |      |    |     |     |       |        |        |      |      |
| HETATM | 4946 | H1 | PRP | 297 | 6.148 | 30.752 | 32.214 | 1.00 | 0.00 |
| H      |      |    |     |     |       |        |        |      |      |
| HETATM | 4947 | C1 | PRP | 297 | 4.620 | 29.762 | 32.577 | 1.00 | 0.00 |
| C      |      |    |     |     |       |        |        |      |      |
| HETATM | 4948 | H2 | PRP | 297 | 3.613 | 29.704 | 32.165 | 1.00 | 0.00 |
| H      |      |    |     |     |       |        |        |      |      |
| HETATM | 4949 | H3 | PRP | 297 | 4.985 | 28.741 | 32.693 | 1.00 | 0.00 |
| H      |      |    |     |     |       |        |        |      |      |
| HETATM | 4950 | C2 | PRP | 297 | 4.624 | 30.347 | 33.992 | 1.00 | 0.00 |
| C      |      |    |     |     |       |        |        |      |      |
| HETATM | 4951 | H4 | PRP | 297 | 4.532 | 31.433 | 34.019 | 1.00 | 0.00 |
| H      |      |    |     |     |       |        |        |      |      |
| HETATM | 4952 | O2 | PRP | 297 | 5.819 | 30.025 | 34.686 | 1.00 | 0.00 |
| O      |      |    |     |     |       |        |        |      |      |
| HETATM | 4953 | H5 | PRP | 297 | 6.594 | 30.105 | 34.125 | 1.00 | 0.00 |
| H      |      |    |     |     |       |        |        |      |      |
| HETATM | 4954 | C3 | PRP | 297 | 3.388 | 29.872 | 34.748 | 1.00 | 0.00 |
| C      |      |    |     |     |       |        |        |      |      |
| HETATM | 4955 | H6 | PRP | 297 | 3.462 | 30.302 | 35.747 | 1.00 | 0.00 |
| H      |      |    |     |     |       |        |        |      |      |

|        |      |    |     |     |        |        |        |      |      |
|--------|------|----|-----|-----|--------|--------|--------|------|------|
| HETATM | 4956 | H7 | PRP | 297 | 2.508  | 30.265 | 34.238 | 1.00 | 0.00 |
| H      |      |    |     |     |        |        |        |      |      |
| HETATM | 4957 | H8 | PRP | 297 | 3.417  | 28.791 | 34.885 | 1.00 | 0.00 |
| H      |      |    |     |     |        |        |        |      |      |
| HETATM | 4958 | O1 | PRP | 298 | 10.915 | 40.484 | 27.157 | 1.00 | 0.00 |
| O      |      |    |     |     |        |        |        |      |      |
| HETATM | 4959 | H1 | PRP | 298 | 11.487 | 40.255 | 26.421 | 1.00 | 0.00 |
| H      |      |    |     |     |        |        |        |      |      |
| HETATM | 4960 | C1 | PRP | 298 | 9.546  | 40.348 | 26.800 | 1.00 | 0.00 |
| C      |      |    |     |     |        |        |        |      |      |
| HETATM | 4961 | H2 | PRP | 298 | 9.303  | 39.366 | 26.396 | 1.00 | 0.00 |
| H      |      |    |     |     |        |        |        |      |      |
| HETATM | 4962 | H3 | PRP | 298 | 9.075  | 40.489 | 27.773 | 1.00 | 0.00 |
| H      |      |    |     |     |        |        |        |      |      |
| HETATM | 4963 | C2 | PRP | 298 | 9.057  | 41.465 | 25.848 | 1.00 | 0.00 |
| C      |      |    |     |     |        |        |        |      |      |
| HETATM | 4964 | H4 | PRP | 298 | 9.669  | 41.506 | 24.947 | 1.00 | 0.00 |
| H      |      |    |     |     |        |        |        |      |      |
| HETATM | 4965 | O2 | PRP | 298 | 9.025  | 42.825 | 26.355 | 1.00 | 0.00 |
| O      |      |    |     |     |        |        |        |      |      |
| HETATM | 4966 | H5 | PRP | 298 | 9.817  | 43.037 | 26.855 | 1.00 | 0.00 |
| H      |      |    |     |     |        |        |        |      |      |
| HETATM | 4967 | C3 | PRP | 298 | 7.558  | 41.168 | 25.416 | 1.00 | 0.00 |
| C      |      |    |     |     |        |        |        |      |      |
| HETATM | 4968 | H6 | PRP | 298 | 7.428  | 40.141 | 25.074 | 1.00 | 0.00 |
| H      |      |    |     |     |        |        |        |      |      |
| HETATM | 4969 | H7 | PRP | 298 | 6.900  | 41.352 | 26.265 | 1.00 | 0.00 |
| H      |      |    |     |     |        |        |        |      |      |
| HETATM | 4970 | H8 | PRP | 298 | 7.326  | 41.782 | 24.546 | 1.00 | 0.00 |
| H      |      |    |     |     |        |        |        |      |      |
| HETATM | 4971 | O1 | PRP | 299 | 10.125 | 39.149 | 37.227 | 1.00 | 0.00 |
| O      |      |    |     |     |        |        |        |      |      |
| HETATM | 4972 | H1 | PRP | 299 | 10.021 | 40.030 | 37.594 | 1.00 | 0.00 |
| H      |      |    |     |     |        |        |        |      |      |
| HETATM | 4973 | C1 | PRP | 299 | 11.514 | 38.797 | 37.070 | 1.00 | 0.00 |
| C      |      |    |     |     |        |        |        |      |      |
| HETATM | 4974 | H2 | PRP | 299 | 11.996 | 38.620 | 38.032 | 1.00 | 0.00 |
| H      |      |    |     |     |        |        |        |      |      |
| HETATM | 4975 | H3 | PRP | 299 | 11.747 | 37.934 | 36.446 | 1.00 | 0.00 |
| H      |      |    |     |     |        |        |        |      |      |
| HETATM | 4976 | C2 | PRP | 299 | 12.209 | 40.039 | 36.473 | 1.00 | 0.00 |
| C      |      |    |     |     |        |        |        |      |      |
| HETATM | 4977 | H4 | PRP | 299 | 13.074 | 39.714 | 35.893 | 1.00 | 0.00 |
| H      |      |    |     |     |        |        |        |      |      |
| HETATM | 4978 | O2 | PRP | 299 | 12.636 | 40.986 | 37.382 | 1.00 | 0.00 |
| O      |      |    |     |     |        |        |        |      |      |
| HETATM | 4979 | H5 | PRP | 299 | 13.343 | 40.661 | 37.944 | 1.00 | 0.00 |
| H      |      |    |     |     |        |        |        |      |      |
| HETATM | 4980 | C3 | PRP | 299 | 11.353 | 40.681 | 35.408 | 1.00 | 0.00 |
| C      |      |    |     |     |        |        |        |      |      |
| HETATM | 4981 | H6 | PRP | 299 | 11.028 | 39.991 | 34.629 | 1.00 | 0.00 |
| H      |      |    |     |     |        |        |        |      |      |
| HETATM | 4982 | H7 | PRP | 299 | 10.483 | 41.200 | 35.811 | 1.00 | 0.00 |
| H      |      |    |     |     |        |        |        |      |      |
| HETATM | 4983 | H8 | PRP | 299 | 11.910 | 41.440 | 34.859 | 1.00 | 0.00 |
| H      |      |    |     |     |        |        |        |      |      |

|        |      |    |     |     |        |        |        |      |      |
|--------|------|----|-----|-----|--------|--------|--------|------|------|
| HETATM | 4984 | O1 | PRP | 300 | -3.133 | 34.009 | 42.923 | 1.00 | 0.00 |
| O      |      |    |     |     |        |        |        |      |      |
| HETATM | 4985 | H1 | PRP | 300 | -2.424 | 33.377 | 42.782 | 1.00 | 0.00 |
| H      |      |    |     |     |        |        |        |      |      |
| HETATM | 4986 | C1 | PRP | 300 | -2.449 | 35.263 | 42.953 | 1.00 | 0.00 |
| C      |      |    |     |     |        |        |        |      |      |
| HETATM | 4987 | H2 | PRP | 300 | -1.879 | 35.482 | 42.050 | 1.00 | 0.00 |
| H      |      |    |     |     |        |        |        |      |      |
| HETATM | 4988 | H3 | PRP | 300 | -3.233 | 36.005 | 43.101 | 1.00 | 0.00 |
| H      |      |    |     |     |        |        |        |      |      |
| HETATM | 4989 | C2 | PRP | 300 | -1.597 | 35.275 | 44.099 | 1.00 | 0.00 |
| C      |      |    |     |     |        |        |        |      |      |
| HETATM | 4990 | H4 | PRP | 300 | -0.795 | 34.538 | 44.109 | 1.00 | 0.00 |
| H      |      |    |     |     |        |        |        |      |      |
| HETATM | 4991 | O2 | PRP | 300 | -2.350 | 35.104 | 45.247 | 1.00 | 0.00 |
| O      |      |    |     |     |        |        |        |      |      |
| HETATM | 4992 | H5 | PRP | 300 | -2.081 | 34.359 | 45.790 | 1.00 | 0.00 |
| H      |      |    |     |     |        |        |        |      |      |
| HETATM | 4993 | C3 | PRP | 300 | -0.877 | 36.583 | 44.039 | 1.00 | 0.00 |
| C      |      |    |     |     |        |        |        |      |      |
| HETATM | 4994 | H6 | PRP | 300 | -1.602 | 37.394 | 43.964 | 1.00 | 0.00 |
| H      |      |    |     |     |        |        |        |      |      |
| HETATM | 4995 | H7 | PRP | 300 | -0.165 | 36.679 | 44.860 | 1.00 | 0.00 |
| H      |      |    |     |     |        |        |        |      |      |
| HETATM | 4996 | H8 | PRP | 300 | -0.218 | 36.674 | 43.176 | 1.00 | 0.00 |
| H      |      |    |     |     |        |        |        |      |      |
| HETATM | 4997 | O1 | PRP | 301 | 12.636 | 52.978 | 38.593 | 1.00 | 0.00 |
| O      |      |    |     |     |        |        |        |      |      |
| HETATM | 4998 | H1 | PRP | 301 | 12.231 | 53.710 | 39.064 | 1.00 | 0.00 |
| H      |      |    |     |     |        |        |        |      |      |
| HETATM | 4999 | C1 | PRP | 301 | 13.163 | 52.178 | 39.671 | 1.00 | 0.00 |
| C      |      |    |     |     |        |        |        |      |      |
| HETATM | 5000 | H2 | PRP | 301 | 13.042 | 51.157 | 39.310 | 1.00 | 0.00 |
| H      |      |    |     |     |        |        |        |      |      |
| HETATM | 5001 | H3 | PRP | 301 | 14.215 | 52.211 | 39.956 | 1.00 | 0.00 |
| H      |      |    |     |     |        |        |        |      |      |
| HETATM | 5002 | C2 | PRP | 301 | 12.419 | 52.341 | 40.935 | 1.00 | 0.00 |
| C      |      |    |     |     |        |        |        |      |      |
| HETATM | 5003 | H4 | PRP | 301 | 13.048 | 51.954 | 41.737 | 1.00 | 0.00 |
| H      |      |    |     |     |        |        |        |      |      |
| HETATM | 5004 | O2 | PRP | 301 | 11.190 | 51.573 | 40.896 | 1.00 | 0.00 |
| O      |      |    |     |     |        |        |        |      |      |
| HETATM | 5005 | H5 | PRP | 301 | 10.949 | 51.565 | 39.967 | 1.00 | 0.00 |
| H      |      |    |     |     |        |        |        |      |      |
| HETATM | 5006 | C3 | PRP | 301 | 12.192 | 53.797 | 41.316 | 1.00 | 0.00 |
| C      |      |    |     |     |        |        |        |      |      |
| HETATM | 5007 | H6 | PRP | 301 | 13.037 | 54.430 | 41.042 | 1.00 | 0.00 |
| H      |      |    |     |     |        |        |        |      |      |
| HETATM | 5008 | H7 | PRP | 301 | 11.304 | 54.033 | 40.729 | 1.00 | 0.00 |
| H      |      |    |     |     |        |        |        |      |      |
| HETATM | 5009 | H8 | PRP | 301 | 11.976 | 53.914 | 42.378 | 1.00 | 0.00 |
| H      |      |    |     |     |        |        |        |      |      |
| HETATM | 5010 | O1 | PRP | 302 | 26.325 | 37.850 | 27.392 | 1.00 | 0.00 |
| O      |      |    |     |     |        |        |        |      |      |
| HETATM | 5011 | H1 | PRP | 302 | 26.619 | 38.490 | 26.739 | 1.00 | 0.00 |
| H      |      |    |     |     |        |        |        |      |      |

|        |      |    |     |     |         |        |        |      |      |
|--------|------|----|-----|-----|---------|--------|--------|------|------|
| HETATM | 5012 | C1 | PRP | 302 | 25.090  | 38.248 | 27.951 | 1.00 | 0.00 |
| C      |      |    |     |     |         |        |        |      |      |
| HETATM | 5013 | H2 | PRP | 302 | 24.636  | 37.500 | 28.601 | 1.00 | 0.00 |
| H      |      |    |     |     |         |        |        |      |      |
| HETATM | 5014 | H3 | PRP | 302 | 25.236  | 39.199 | 28.463 | 1.00 | 0.00 |
| H      |      |    |     |     |         |        |        |      |      |
| HETATM | 5015 | C2 | PRP | 302 | 23.996  | 38.565 | 26.856 | 1.00 | 0.00 |
| C      |      |    |     |     |         |        |        |      |      |
| HETATM | 5016 | H4 | PRP | 302 | 24.028  | 37.768 | 26.112 | 1.00 | 0.00 |
| H      |      |    |     |     |         |        |        |      |      |
| HETATM | 5017 | O2 | PRP | 302 | 24.304  | 39.757 | 26.169 | 1.00 | 0.00 |
| O      |      |    |     |     |         |        |        |      |      |
| HETATM | 5018 | H5 | PRP | 302 | 23.731  | 39.818 | 25.401 | 1.00 | 0.00 |
| H      |      |    |     |     |         |        |        |      |      |
| HETATM | 5019 | C3 | PRP | 302 | 22.615  | 38.610 | 27.519 | 1.00 | 0.00 |
| C      |      |    |     |     |         |        |        |      |      |
| HETATM | 5020 | H6 | PRP | 302 | 22.367  | 37.578 | 27.764 | 1.00 | 0.00 |
| H      |      |    |     |     |         |        |        |      |      |
| HETATM | 5021 | H7 | PRP | 302 | 22.660  | 39.345 | 28.323 | 1.00 | 0.00 |
| H      |      |    |     |     |         |        |        |      |      |
| HETATM | 5022 | H8 | PRP | 302 | 21.828  | 38.841 | 26.801 | 1.00 | 0.00 |
| H      |      |    |     |     |         |        |        |      |      |
| HETATM | 5023 | O1 | PRP | 303 | -15.711 | 7.834  | 46.429 | 1.00 | 0.00 |
| O      |      |    |     |     |         |        |        |      |      |
| HETATM | 5024 | H1 | PRP | 303 | -15.866 | 7.841  | 47.376 | 1.00 | 0.00 |
| H      |      |    |     |     |         |        |        |      |      |
| HETATM | 5025 | C1 | PRP | 303 | -15.115 | 6.606  | 46.195 | 1.00 | 0.00 |
| C      |      |    |     |     |         |        |        |      |      |
| HETATM | 5026 | H2 | PRP | 303 | -15.430 | 6.249  | 45.215 | 1.00 | 0.00 |
| H      |      |    |     |     |         |        |        |      |      |
| HETATM | 5027 | H3 | PRP | 303 | -14.027 | 6.580  | 46.124 | 1.00 | 0.00 |
| H      |      |    |     |     |         |        |        |      |      |
| HETATM | 5028 | C2 | PRP | 303 | -15.507 | 5.564  | 47.209 | 1.00 | 0.00 |
| C      |      |    |     |     |         |        |        |      |      |
| HETATM | 5029 | H4 | PRP | 303 | -16.570 | 5.350  | 47.316 | 1.00 | 0.00 |
| H      |      |    |     |     |         |        |        |      |      |
| HETATM | 5030 | O2 | PRP | 303 | -15.100 | 5.887  | 48.491 | 1.00 | 0.00 |
| O      |      |    |     |     |         |        |        |      |      |
| HETATM | 5031 | H5 | PRP | 303 | -15.606 | 6.668  | 48.729 | 1.00 | 0.00 |
| H      |      |    |     |     |         |        |        |      |      |
| HETATM | 5032 | C3 | PRP | 303 | -14.835 | 4.220  | 46.882 | 1.00 | 0.00 |
| C      |      |    |     |     |         |        |        |      |      |
| HETATM | 5033 | H6 | PRP | 303 | -14.872 | 3.557  | 47.747 | 1.00 | 0.00 |
| H      |      |    |     |     |         |        |        |      |      |
| HETATM | 5034 | H7 | PRP | 303 | -15.382 | 3.735  | 46.074 | 1.00 | 0.00 |
| H      |      |    |     |     |         |        |        |      |      |
| HETATM | 5035 | H8 | PRP | 303 | -13.814 | 4.362  | 46.530 | 1.00 | 0.00 |
| H      |      |    |     |     |         |        |        |      |      |
| HETATM | 5036 | O1 | PRP | 304 | -4.705  | 42.325 | 30.353 | 1.00 | 0.00 |
| O      |      |    |     |     |         |        |        |      |      |
| HETATM | 5037 | H1 | PRP | 304 | -4.506  | 43.112 | 29.841 | 1.00 | 0.00 |
| H      |      |    |     |     |         |        |        |      |      |
| HETATM | 5038 | C1 | PRP | 304 | -3.677  | 41.409 | 30.046 | 1.00 | 0.00 |
| C      |      |    |     |     |         |        |        |      |      |
| HETATM | 5039 | H2 | PRP | 304 | -4.134  | 40.694 | 29.362 | 1.00 | 0.00 |
| H      |      |    |     |     |         |        |        |      |      |

|        |      |    |     |     |         |        |        |      |      |
|--------|------|----|-----|-----|---------|--------|--------|------|------|
| HETATM | 5040 | H3 | PRP | 304 | -2.781  | 41.936 | 29.720 | 1.00 | 0.00 |
| H      |      |    |     |     |         |        |        |      |      |
| HETATM | 5041 | C2 | PRP | 304 | -3.318  | 40.630 | 31.313 | 1.00 | 0.00 |
| C      |      |    |     |     |         |        |        |      |      |
| HETATM | 5042 | H4 | PRP | 304 | -2.787  | 39.736 | 30.988 | 1.00 | 0.00 |
| H      |      |    |     |     |         |        |        |      |      |
| HETATM | 5043 | O2 | PRP | 304 | -4.495  | 40.149 | 31.940 | 1.00 | 0.00 |
| O      |      |    |     |     |         |        |        |      |      |
| HETATM | 5044 | H5 | PRP | 304 | -5.260  | 40.672 | 31.691 | 1.00 | 0.00 |
| H      |      |    |     |     |         |        |        |      |      |
| HETATM | 5045 | C3 | PRP | 304 | -2.666  | 41.438 | 32.393 | 1.00 | 0.00 |
| C      |      |    |     |     |         |        |        |      |      |
| HETATM | 5046 | H6 | PRP | 304 | -2.370  | 40.829 | 33.248 | 1.00 | 0.00 |
| H      |      |    |     |     |         |        |        |      |      |
| HETATM | 5047 | H7 | PRP | 304 | -1.801  | 41.880 | 31.899 | 1.00 | 0.00 |
| H      |      |    |     |     |         |        |        |      |      |
| HETATM | 5048 | H8 | PRP | 304 | -3.337  | 42.196 | 32.797 | 1.00 | 0.00 |
| H      |      |    |     |     |         |        |        |      |      |
| HETATM | 5049 | O1 | PRP | 305 | -10.072 | 34.201 | 50.147 | 1.00 | 0.00 |
| O      |      |    |     |     |         |        |        |      |      |
| HETATM | 5050 | H1 | PRP | 305 | -9.421  | 34.213 | 50.852 | 1.00 | 0.00 |
| H      |      |    |     |     |         |        |        |      |      |
| HETATM | 5051 | C1 | PRP | 305 | -9.530  | 33.321 | 49.212 | 1.00 | 0.00 |
| C      |      |    |     |     |         |        |        |      |      |
| HETATM | 5052 | H2 | PRP | 305 | -8.715  | 33.728 | 48.614 | 1.00 | 0.00 |
| H      |      |    |     |     |         |        |        |      |      |
| HETATM | 5053 | H3 | PRP | 305 | -9.072  | 32.519 | 49.791 | 1.00 | 0.00 |
| H      |      |    |     |     |         |        |        |      |      |
| HETATM | 5054 | C2 | PRP | 305 | -10.582 | 32.527 | 48.447 | 1.00 | 0.00 |
| C      |      |    |     |     |         |        |        |      |      |
| HETATM | 5055 | H4 | PRP | 305 | -11.273 | 33.221 | 47.968 | 1.00 | 0.00 |
| H      |      |    |     |     |         |        |        |      |      |
| HETATM | 5056 | O2 | PRP | 305 | -11.196 | 31.544 | 49.182 | 1.00 | 0.00 |
| O      |      |    |     |     |         |        |        |      |      |
| HETATM | 5057 | H5 | PRP | 305 | -11.225 | 31.749 | 50.120 | 1.00 | 0.00 |
| H      |      |    |     |     |         |        |        |      |      |
| HETATM | 5058 | C3 | PRP | 305 | -9.901  | 31.785 | 47.353 | 1.00 | 0.00 |
| C      |      |    |     |     |         |        |        |      |      |
| HETATM | 5059 | H6 | PRP | 305 | -10.357 | 30.890 | 46.931 | 1.00 | 0.00 |
| H      |      |    |     |     |         |        |        |      |      |
| HETATM | 5060 | H7 | PRP | 305 | -9.872  | 32.483 | 46.516 | 1.00 | 0.00 |
| H      |      |    |     |     |         |        |        |      |      |
| HETATM | 5061 | H8 | PRP | 305 | -8.862  | 31.551 | 47.586 | 1.00 | 0.00 |
| H      |      |    |     |     |         |        |        |      |      |
| HETATM | 5062 | O1 | PRP | 306 | -0.973  | 29.530 | 45.048 | 1.00 | 0.00 |
| O      |      |    |     |     |         |        |        |      |      |
| HETATM | 5063 | H1 | PRP | 306 | -1.119  | 29.602 | 45.994 | 1.00 | 0.00 |
| H      |      |    |     |     |         |        |        |      |      |
| HETATM | 5064 | C1 | PRP | 306 | -2.371  | 29.524 | 44.546 | 1.00 | 0.00 |
| C      |      |    |     |     |         |        |        |      |      |
| HETATM | 5065 | H2 | PRP | 306 | -2.842  | 30.492 | 44.716 | 1.00 | 0.00 |
| H      |      |    |     |     |         |        |        |      |      |
| HETATM | 5066 | H3 | PRP | 306 | -2.420  | 29.154 | 43.522 | 1.00 | 0.00 |
| H      |      |    |     |     |         |        |        |      |      |
| HETATM | 5067 | C2 | PRP | 306 | -3.234  | 28.572 | 45.349 | 1.00 | 0.00 |
| C      |      |    |     |     |         |        |        |      |      |



|        |      |    |     |     |         |        |        |      |      |
|--------|------|----|-----|-----|---------|--------|--------|------|------|
| HETATM | 5068 | H4 | PRP | 306 | -4.285  | 28.862 | 45.344 | 1.00 | 0.00 |
| H      |      |    |     |     |         |        |        |      |      |
| HETATM | 5069 | O2 | PRP | 306 | -2.758  | 28.509 | 46.699 | 1.00 | 0.00 |
| O      |      |    |     |     |         |        |        |      |      |
| HETATM | 5070 | H5 | PRP | 306 | -3.195  | 29.215 | 47.182 | 1.00 | 0.00 |
| H      |      |    |     |     |         |        |        |      |      |
| HETATM | 5071 | C3 | PRP | 306 | -3.155  | 27.137 | 44.766 | 1.00 | 0.00 |
| C      |      |    |     |     |         |        |        |      |      |
| HETATM | 5072 | H6 | PRP | 306 | -4.003  | 26.599 | 45.190 | 1.00 | 0.00 |
| H      |      |    |     |     |         |        |        |      |      |
| HETATM | 5073 | H7 | PRP | 306 | -3.423  | 27.084 | 43.711 | 1.00 | 0.00 |
| H      |      |    |     |     |         |        |        |      |      |
| HETATM | 5074 | H8 | PRP | 306 | -2.213  | 26.616 | 44.936 | 1.00 | 0.00 |
| H      |      |    |     |     |         |        |        |      |      |
| HETATM | 5075 | O1 | PRP | 307 | -8.502  | 29.598 | 44.000 | 1.00 | 0.00 |
| O      |      |    |     |     |         |        |        |      |      |
| HETATM | 5076 | H1 | PRP | 307 | -8.540  | 29.340 | 44.924 | 1.00 | 0.00 |
| H      |      |    |     |     |         |        |        |      |      |
| HETATM | 5077 | C1 | PRP | 307 | -9.814  | 29.516 | 43.372 | 1.00 | 0.00 |
| C      |      |    |     |     |         |        |        |      |      |
| HETATM | 5078 | H2 | PRP | 307 | -10.060 | 28.488 | 43.104 | 1.00 | 0.00 |
| H      |      |    |     |     |         |        |        |      |      |
| HETATM | 5079 | H3 | PRP | 307 | -10.467 | 29.839 | 44.182 | 1.00 | 0.00 |
| H      |      |    |     |     |         |        |        |      |      |
| HETATM | 5080 | C2 | PRP | 307 | -10.061 | 30.412 | 42.101 | 1.00 | 0.00 |
| C      |      |    |     |     |         |        |        |      |      |
| HETATM | 5081 | H4 | PRP | 307 | -9.280  | 30.249 | 41.359 | 1.00 | 0.00 |
| H      |      |    |     |     |         |        |        |      |      |
| HETATM | 5082 | O2 | PRP | 307 | -10.089 | 31.737 | 42.490 | 1.00 | 0.00 |
| O      |      |    |     |     |         |        |        |      |      |
| HETATM | 5083 | H5 | PRP | 307 | -9.203  | 31.981 | 42.769 | 1.00 | 0.00 |
| H      |      |    |     |     |         |        |        |      |      |
| HETATM | 5084 | C3 | PRP | 307 | -11.402 | 30.140 | 41.517 | 1.00 | 0.00 |
| C      |      |    |     |     |         |        |        |      |      |
| HETATM | 5085 | H6 | PRP | 307 | -11.489 | 29.076 | 41.301 | 1.00 | 0.00 |
| H      |      |    |     |     |         |        |        |      |      |
| HETATM | 5086 | H7 | PRP | 307 | -12.199 | 30.496 | 42.170 | 1.00 | 0.00 |
| H      |      |    |     |     |         |        |        |      |      |
| HETATM | 5087 | H8 | PRP | 307 | -11.480 | 30.685 | 40.576 | 1.00 | 0.00 |
| H      |      |    |     |     |         |        |        |      |      |
| HETATM | 5088 | O1 | PRP | 308 | 11.725  | 49.962 | 35.808 | 1.00 | 0.00 |
| O      |      |    |     |     |         |        |        |      |      |
| HETATM | 5089 | H1 | PRP | 308 | 12.587  | 49.626 | 35.551 | 1.00 | 0.00 |
| H      |      |    |     |     |         |        |        |      |      |
| HETATM | 5090 | C1 | PRP | 308 | 10.994  | 50.134 | 34.544 | 1.00 | 0.00 |
| C      |      |    |     |     |         |        |        |      |      |
| HETATM | 5091 | H2 | PRP | 308 | 10.549  | 49.220 | 34.151 | 1.00 | 0.00 |
| H      |      |    |     |     |         |        |        |      |      |
| HETATM | 5092 | H3 | PRP | 308 | 10.087  | 50.723 | 34.684 | 1.00 | 0.00 |
| H      |      |    |     |     |         |        |        |      |      |
| HETATM | 5093 | C2 | PRP | 308 | 11.870  | 50.845 | 33.485 | 1.00 | 0.00 |
| C      |      |    |     |     |         |        |        |      |      |
| HETATM | 5094 | H4 | PRP | 308 | 12.673  | 50.146 | 33.248 | 1.00 | 0.00 |
| H      |      |    |     |     |         |        |        |      |      |
| HETATM | 5095 | O2 | PRP | 308 | 12.378  | 52.084 | 33.933 | 1.00 | 0.00 |
| O      |      |    |     |     |         |        |        |      |      |

|        |      |    |     |     |        |        |        |      |      |
|--------|------|----|-----|-----|--------|--------|--------|------|------|
| HETATM | 5096 | H5 | PRP | 308 | 12.659 | 51.861 | 34.823 | 1.00 | 0.00 |
| H      |      |    |     |     |        |        |        |      |      |
| HETATM | 5097 | C3 | PRP | 308 | 11.142 | 51.097 | 32.148 | 1.00 | 0.00 |
| C      |      |    |     |     |        |        |        |      |      |
| HETATM | 5098 | H6 | PRP | 308 | 10.292 | 50.427 | 32.027 | 1.00 | 0.00 |
| H      |      |    |     |     |        |        |        |      |      |
| HETATM | 5099 | H7 | PRP | 308 | 10.654 | 52.069 | 32.221 | 1.00 | 0.00 |
| H      |      |    |     |     |        |        |        |      |      |
| HETATM | 5100 | H8 | PRP | 308 | 11.722 | 50.993 | 31.231 | 1.00 | 0.00 |
| H      |      |    |     |     |        |        |        |      |      |
| HETATM | 5101 | O1 | PRP | 309 | 12.865 | 41.442 | 31.453 | 1.00 | 0.00 |
| O      |      |    |     |     |        |        |        |      |      |
| HETATM | 5102 | H1 | PRP | 309 | 12.568 | 42.012 | 30.740 | 1.00 | 0.00 |
| H      |      |    |     |     |        |        |        |      |      |
| HETATM | 5103 | C1 | PRP | 309 | 11.772 | 40.432 | 31.500 | 1.00 | 0.00 |
| C      |      |    |     |     |        |        |        |      |      |
| HETATM | 5104 | H2 | PRP | 309 | 12.099 | 39.395 | 31.414 | 1.00 | 0.00 |
| H      |      |    |     |     |        |        |        |      |      |
| HETATM | 5105 | H3 | PRP | 309 | 11.360 | 40.529 | 32.504 | 1.00 | 0.00 |
| H      |      |    |     |     |        |        |        |      |      |
| HETATM | 5106 | C2 | PRP | 309 | 10.618 | 40.820 | 30.526 | 1.00 | 0.00 |
| C      |      |    |     |     |        |        |        |      |      |
| HETATM | 5107 | H4 | PRP | 309 | 10.182 | 39.867 | 30.228 | 1.00 | 0.00 |
| H      |      |    |     |     |        |        |        |      |      |
| HETATM | 5108 | O2 | PRP | 309 | 11.062 | 41.765 | 29.482 | 1.00 | 0.00 |
| O      |      |    |     |     |        |        |        |      |      |
| HETATM | 5109 | H5 | PRP | 309 | 11.140 | 41.253 | 28.673 | 1.00 | 0.00 |
| H      |      |    |     |     |        |        |        |      |      |
| HETATM | 5110 | C3 | PRP | 309 | 9.522  | 41.619 | 31.369 | 1.00 | 0.00 |
| C      |      |    |     |     |        |        |        |      |      |
| HETATM | 5111 | H6 | PRP | 309 | 9.139  | 41.054 | 32.219 | 1.00 | 0.00 |
| H      |      |    |     |     |        |        |        |      |      |
| HETATM | 5112 | H7 | PRP | 309 | 10.001 | 42.545 | 31.686 | 1.00 | 0.00 |
| H      |      |    |     |     |        |        |        |      |      |
| HETATM | 5113 | H8 | PRP | 309 | 8.661  | 41.985 | 30.810 | 1.00 | 0.00 |
| H      |      |    |     |     |        |        |        |      |      |
| HETATM | 5114 | O1 | PRP | 310 | -3.951 | 35.665 | 22.733 | 1.00 | 0.00 |
| O      |      |    |     |     |        |        |        |      |      |
| HETATM | 5115 | H1 | PRP | 310 | -4.051 | 35.188 | 21.906 | 1.00 | 0.00 |
| H      |      |    |     |     |        |        |        |      |      |
| HETATM | 5116 | C1 | PRP | 310 | -5.007 | 36.628 | 22.725 | 1.00 | 0.00 |
| C      |      |    |     |     |        |        |        |      |      |
| HETATM | 5117 | H2 | PRP | 310 | -4.509 | 37.529 | 22.365 | 1.00 | 0.00 |
| H      |      |    |     |     |        |        |        |      |      |
| HETATM | 5118 | H3 | PRP | 310 | -5.706 | 36.472 | 21.904 | 1.00 | 0.00 |
| H      |      |    |     |     |        |        |        |      |      |
| HETATM | 5119 | C2 | PRP | 310 | -5.664 | 36.946 | 24.066 | 1.00 | 0.00 |
| C      |      |    |     |     |        |        |        |      |      |
| HETATM | 5120 | H4 | PRP | 310 | -4.875 | 37.057 | 24.809 | 1.00 | 0.00 |
| H      |      |    |     |     |        |        |        |      |      |
| HETATM | 5121 | O2 | PRP | 310 | -6.469 | 35.958 | 24.525 | 1.00 | 0.00 |
| O      |      |    |     |     |        |        |        |      |      |
| HETATM | 5122 | H5 | PRP | 310 | -6.125 | 35.157 | 24.122 | 1.00 | 0.00 |
| H      |      |    |     |     |        |        |        |      |      |
| HETATM | 5123 | C3 | PRP | 310 | -6.429 | 38.192 | 24.037 | 1.00 | 0.00 |
| C      |      |    |     |     |        |        |        |      |      |

|        |      |    |     |     |        |        |        |      |      |
|--------|------|----|-----|-----|--------|--------|--------|------|------|
| HETATM | 5124 | H6 | PRP | 310 | -5.659 | 38.963 | 24.074 | 1.00 | 0.00 |
| H      |      |    |     |     |        |        |        |      |      |
| HETATM | 5125 | H7 | PRP | 310 | -7.067 | 38.387 | 23.176 | 1.00 | 0.00 |
| H      |      |    |     |     |        |        |        |      |      |
| HETATM | 5126 | H8 | PRP | 310 | -7.008 | 38.280 | 24.957 | 1.00 | 0.00 |
| H      |      |    |     |     |        |        |        |      |      |
| HETATM | 5127 | O1 | PRP | 311 | 4.014  | 36.480 | 38.257 | 1.00 | 0.00 |
| O      |      |    |     |     |        |        |        |      |      |
| HETATM | 5128 | H1 | PRP | 311 | 4.318  | 36.825 | 39.100 | 1.00 | 0.00 |
| H      |      |    |     |     |        |        |        |      |      |
| HETATM | 5129 | C1 | PRP | 311 | 4.613  | 35.246 | 38.056 | 1.00 | 0.00 |
| C      |      |    |     |     |        |        |        |      |      |
| HETATM | 5130 | H2 | PRP | 311 | 5.610  | 35.133 | 38.482 | 1.00 | 0.00 |
| H      |      |    |     |     |        |        |        |      |      |
| HETATM | 5131 | H3 | PRP | 311 | 3.955  | 34.547 | 38.572 | 1.00 | 0.00 |
| H      |      |    |     |     |        |        |        |      |      |
| HETATM | 5132 | C2 | PRP | 311 | 4.618  | 34.886 | 36.551 | 1.00 | 0.00 |
| C      |      |    |     |     |        |        |        |      |      |
| HETATM | 5133 | H4 | PRP | 311 | 5.169  | 35.650 | 36.005 | 1.00 | 0.00 |
| H      |      |    |     |     |        |        |        |      |      |
| HETATM | 5134 | O2 | PRP | 311 | 3.327  | 34.905 | 36.035 | 1.00 | 0.00 |
| O      |      |    |     |     |        |        |        |      |      |
| HETATM | 5135 | H5 | PRP | 311 | 2.876  | 35.716 | 36.277 | 1.00 | 0.00 |
| H      |      |    |     |     |        |        |        |      |      |
| HETATM | 5136 | C3 | PRP | 311 | 5.240  | 33.496 | 36.344 | 1.00 | 0.00 |
| C      |      |    |     |     |        |        |        |      |      |
| HETATM | 5137 | H6 | PRP | 311 | 6.017  | 33.393 | 37.102 | 1.00 | 0.00 |
| H      |      |    |     |     |        |        |        |      |      |
| HETATM | 5138 | H7 | PRP | 311 | 4.491  | 32.712 | 36.461 | 1.00 | 0.00 |
| H      |      |    |     |     |        |        |        |      |      |
| HETATM | 5139 | H8 | PRP | 311 | 5.718  | 33.333 | 35.378 | 1.00 | 0.00 |
| H      |      |    |     |     |        |        |        |      |      |
| HETATM | 5140 | O1 | PRP | 312 | -3.477 | 22.108 | 30.403 | 1.00 | 0.00 |
| O      |      |    |     |     |        |        |        |      |      |
| HETATM | 5141 | H1 | PRP | 312 | -3.131 | 22.959 | 30.682 | 1.00 | 0.00 |
| H      |      |    |     |     |        |        |        |      |      |
| HETATM | 5142 | C1 | PRP | 312 | -2.430 | 21.174 | 30.691 | 1.00 | 0.00 |
| C      |      |    |     |     |        |        |        |      |      |
| HETATM | 5143 | H2 | PRP | 312 | -2.664 | 20.200 | 30.261 | 1.00 | 0.00 |
| H      |      |    |     |     |        |        |        |      |      |
| HETATM | 5144 | H3 | PRP | 312 | -1.495 | 21.547 | 30.274 | 1.00 | 0.00 |
| H      |      |    |     |     |        |        |        |      |      |
| HETATM | 5145 | C2 | PRP | 312 | -2.324 | 20.897 | 32.172 | 1.00 | 0.00 |
| C      |      |    |     |     |        |        |        |      |      |
| HETATM | 5146 | H4 | PRP | 312 | -1.505 | 20.185 | 32.273 | 1.00 | 0.00 |
| H      |      |    |     |     |        |        |        |      |      |
| HETATM | 5147 | O2 | PRP | 312 | -3.463 | 20.397 | 32.700 | 1.00 | 0.00 |
| O      |      |    |     |     |        |        |        |      |      |
| HETATM | 5148 | H5 | PRP | 312 | -4.039 | 21.142 | 32.885 | 1.00 | 0.00 |
| H      |      |    |     |     |        |        |        |      |      |
| HETATM | 5149 | C3 | PRP | 312 | -2.009 | 22.174 | 32.979 | 1.00 | 0.00 |
| C      |      |    |     |     |        |        |        |      |      |
| HETATM | 5150 | H6 | PRP | 312 | -2.603 | 23.015 | 32.621 | 1.00 | 0.00 |
| H      |      |    |     |     |        |        |        |      |      |
| HETATM | 5151 | H7 | PRP | 312 | -2.149 | 21.966 | 34.040 | 1.00 | 0.00 |
| H      |      |    |     |     |        |        |        |      |      |

|        |      |    |     |     |        |        |        |      |      |
|--------|------|----|-----|-----|--------|--------|--------|------|------|
| HETATM | 5152 | H8 | PRP | 312 | -0.979 | 22.452 | 32.755 | 1.00 | 0.00 |
| H      |      |    |     |     |        |        |        |      |      |
| HETATM | 5153 | O1 | PRP | 313 | -1.804 | 36.794 | 33.996 | 1.00 | 0.00 |
| O      |      |    |     |     |        |        |        |      |      |
| HETATM | 5154 | H1 | PRP | 313 | -2.001 | 36.534 | 33.093 | 1.00 | 0.00 |
| H      |      |    |     |     |        |        |        |      |      |
| HETATM | 5155 | C1 | PRP | 313 | -2.816 | 36.247 | 34.805 | 1.00 | 0.00 |
| C      |      |    |     |     |        |        |        |      |      |
| HETATM | 5156 | H2 | PRP | 313 | -2.970 | 35.186 | 34.609 | 1.00 | 0.00 |
| H      |      |    |     |     |        |        |        |      |      |
| HETATM | 5157 | H3 | PRP | 313 | -2.467 | 36.432 | 35.821 | 1.00 | 0.00 |
| H      |      |    |     |     |        |        |        |      |      |
| HETATM | 5158 | C2 | PRP | 313 | -4.190 | 36.929 | 34.577 | 1.00 | 0.00 |
| C      |      |    |     |     |        |        |        |      |      |
| HETATM | 5159 | H4 | PRP | 313 | -4.968 | 36.477 | 35.192 | 1.00 | 0.00 |
| H      |      |    |     |     |        |        |        |      |      |
| HETATM | 5160 | O2 | PRP | 313 | -4.688 | 36.750 | 33.280 | 1.00 | 0.00 |
| O      |      |    |     |     |        |        |        |      |      |
| HETATM | 5161 | H5 | PRP | 313 | -4.654 | 37.544 | 32.741 | 1.00 | 0.00 |
| H      |      |    |     |     |        |        |        |      |      |
| HETATM | 5162 | C3 | PRP | 313 | -4.159 | 38.501 | 34.865 | 1.00 | 0.00 |
| C      |      |    |     |     |        |        |        |      |      |
| HETATM | 5163 | H6 | PRP | 313 | -3.399 | 38.690 | 35.623 | 1.00 | 0.00 |
| H      |      |    |     |     |        |        |        |      |      |
| HETATM | 5164 | H7 | PRP | 313 | -3.722 | 38.908 | 33.953 | 1.00 | 0.00 |
| H      |      |    |     |     |        |        |        |      |      |
| HETATM | 5165 | H8 | PRP | 313 | -5.167 | 38.829 | 35.118 | 1.00 | 0.00 |
| H      |      |    |     |     |        |        |        |      |      |
| HETATM | 5166 | O1 | PRP | 314 | -9.336 | 37.491 | 37.858 | 1.00 | 0.00 |
| O      |      |    |     |     |        |        |        |      |      |
| HETATM | 5167 | H1 | PRP | 314 | -8.931 | 37.960 | 38.592 | 1.00 | 0.00 |
| H      |      |    |     |     |        |        |        |      |      |
| HETATM | 5168 | C1 | PRP | 314 | -8.472 | 37.560 | 36.667 | 1.00 | 0.00 |
| C      |      |    |     |     |        |        |        |      |      |
| HETATM | 5169 | H2 | PRP | 314 | -8.927 | 38.289 | 35.997 | 1.00 | 0.00 |
| H      |      |    |     |     |        |        |        |      |      |
| HETATM | 5170 | H3 | PRP | 314 | -7.475 | 37.874 | 36.975 | 1.00 | 0.00 |
| H      |      |    |     |     |        |        |        |      |      |
| HETATM | 5171 | C2 | PRP | 314 | -8.304 | 36.203 | 36.009 | 1.00 | 0.00 |
| C      |      |    |     |     |        |        |        |      |      |
| HETATM | 5172 | H4 | PRP | 314 | -7.899 | 36.364 | 35.009 | 1.00 | 0.00 |
| H      |      |    |     |     |        |        |        |      |      |
| HETATM | 5173 | O2 | PRP | 314 | -9.525 | 35.650 | 35.923 | 1.00 | 0.00 |
| O      |      |    |     |     |        |        |        |      |      |
| HETATM | 5174 | H5 | PRP | 314 | -9.964 | 35.987 | 36.708 | 1.00 | 0.00 |
| H      |      |    |     |     |        |        |        |      |      |
| HETATM | 5175 | C3 | PRP | 314 | -7.384 | 35.229 | 36.722 | 1.00 | 0.00 |
| C      |      |    |     |     |        |        |        |      |      |
| HETATM | 5176 | H6 | PRP | 314 | -7.296 | 34.437 | 35.979 | 1.00 | 0.00 |
| H      |      |    |     |     |        |        |        |      |      |
| HETATM | 5177 | H7 | PRP | 314 | -6.441 | 35.594 | 37.130 | 1.00 | 0.00 |
| H      |      |    |     |     |        |        |        |      |      |
| HETATM | 5178 | H8 | PRP | 314 | -7.931 | 34.887 | 37.601 | 1.00 | 0.00 |
| H      |      |    |     |     |        |        |        |      |      |
| HETATM | 5179 | O1 | PRP | 315 | -0.175 | 34.072 | 40.864 | 1.00 | 0.00 |
| O      |      |    |     |     |        |        |        |      |      |

|        |      |    |     |     |        |        |        |      |      |
|--------|------|----|-----|-----|--------|--------|--------|------|------|
| HETATM | 5180 | H1 | PRP | 315 | 0.346  | 34.493 | 40.176 | 1.00 | 0.00 |
| H      |      |    |     |     |        |        |        |      |      |
| HETATM | 5181 | C1 | PRP | 315 | 0.403  | 32.805 | 41.084 | 1.00 | 0.00 |
| C      |      |    |     |     |        |        |        |      |      |
| HETATM | 5182 | H2 | PRP | 315 | 0.776  | 32.545 | 40.093 | 1.00 | 0.00 |
| H      |      |    |     |     |        |        |        |      |      |
| HETATM | 5183 | H3 | PRP | 315 | 1.254  | 32.847 | 41.764 | 1.00 | 0.00 |
| H      |      |    |     |     |        |        |        |      |      |
| HETATM | 5184 | C2 | PRP | 315 | -0.550 | 31.733 | 41.584 | 1.00 | 0.00 |
| C      |      |    |     |     |        |        |        |      |      |
| HETATM | 5185 | H4 | PRP | 315 | -1.364 | 31.752 | 40.859 | 1.00 | 0.00 |
| H      |      |    |     |     |        |        |        |      |      |
| HETATM | 5186 | O2 | PRP | 315 | -1.165 | 32.020 | 42.833 | 1.00 | 0.00 |
| O      |      |    |     |     |        |        |        |      |      |
| HETATM | 5187 | H5 | PRP | 315 | -0.908 | 31.398 | 43.517 | 1.00 | 0.00 |
| H      |      |    |     |     |        |        |        |      |      |
| HETATM | 5188 | C3 | PRP | 315 | 0.069  | 30.387 | 41.647 | 1.00 | 0.00 |
| C      |      |    |     |     |        |        |        |      |      |
| HETATM | 5189 | H6 | PRP | 315 | -0.758 | 29.683 | 41.562 | 1.00 | 0.00 |
| H      |      |    |     |     |        |        |        |      |      |
| HETATM | 5190 | H7 | PRP | 315 | 0.691  | 30.235 | 40.765 | 1.00 | 0.00 |
| H      |      |    |     |     |        |        |        |      |      |
| HETATM | 5191 | H8 | PRP | 315 | 0.646  | 30.327 | 42.569 | 1.00 | 0.00 |
| H      |      |    |     |     |        |        |        |      |      |
| HETATM | 5192 | O1 | PRP | 316 | 17.604 | 43.409 | 28.819 | 1.00 | 0.00 |
| O      |      |    |     |     |        |        |        |      |      |
| HETATM | 5193 | H1 | PRP | 316 | 16.831 | 42.872 | 29.008 | 1.00 | 0.00 |
| H      |      |    |     |     |        |        |        |      |      |
| HETATM | 5194 | C1 | PRP | 316 | 17.443 | 44.548 | 29.642 | 1.00 | 0.00 |
| C      |      |    |     |     |        |        |        |      |      |
| HETATM | 5195 | H2 | PRP | 316 | 16.645 | 45.156 | 29.215 | 1.00 | 0.00 |
| H      |      |    |     |     |        |        |        |      |      |
| HETATM | 5196 | H3 | PRP | 316 | 17.250 | 44.265 | 30.677 | 1.00 | 0.00 |
| H      |      |    |     |     |        |        |        |      |      |
| HETATM | 5197 | C2 | PRP | 316 | 18.831 | 45.341 | 29.698 | 1.00 | 0.00 |
| C      |      |    |     |     |        |        |        |      |      |
| HETATM | 5198 | H4 | PRP | 316 | 18.739 | 46.279 | 30.246 | 1.00 | 0.00 |
| H      |      |    |     |     |        |        |        |      |      |
| HETATM | 5199 | O2 | PRP | 316 | 19.244 | 45.562 | 28.362 | 1.00 | 0.00 |
| O      |      |    |     |     |        |        |        |      |      |
| HETATM | 5200 | H5 | PRP | 316 | 18.803 | 44.884 | 27.846 | 1.00 | 0.00 |
| H      |      |    |     |     |        |        |        |      |      |
| HETATM | 5201 | C3 | PRP | 316 | 19.878 | 44.464 | 30.446 | 1.00 | 0.00 |
| C      |      |    |     |     |        |        |        |      |      |
| HETATM | 5202 | H6 | PRP | 316 | 20.192 | 43.534 | 29.972 | 1.00 | 0.00 |
| H      |      |    |     |     |        |        |        |      |      |
| HETATM | 5203 | H7 | PRP | 316 | 20.721 | 45.148 | 30.544 | 1.00 | 0.00 |
| H      |      |    |     |     |        |        |        |      |      |
| HETATM | 5204 | H8 | PRP | 316 | 19.722 | 44.301 | 31.512 | 1.00 | 0.00 |
| H      |      |    |     |     |        |        |        |      |      |
| HETATM | 5205 | O1 | PRP | 317 | 16.100 | 48.192 | 33.308 | 1.00 | 0.00 |
| O      |      |    |     |     |        |        |        |      |      |
| HETATM | 5206 | H1 | PRP | 317 | 16.849 | 48.622 | 33.726 | 1.00 | 0.00 |
| H      |      |    |     |     |        |        |        |      |      |
| HETATM | 5207 | C1 | PRP | 317 | 15.737 | 48.906 | 32.112 | 1.00 | 0.00 |
| C      |      |    |     |     |        |        |        |      |      |

|        |      |    |     |     |        |        |        |      |      |
|--------|------|----|-----|-----|--------|--------|--------|------|------|
| HETATM | 5208 | H2 | PRP | 317 | 14.715 | 48.677 | 31.809 | 1.00 | 0.00 |
| H      |      |    |     |     |        |        |        |      |      |
| HETATM | 5209 | H3 | PRP | 317 | 15.913 | 49.931 | 32.440 | 1.00 | 0.00 |
| H      |      |    |     |     |        |        |        |      |      |
| HETATM | 5210 | C2 | PRP | 317 | 16.636 | 48.418 | 30.955 | 1.00 | 0.00 |
| C      |      |    |     |     |        |        |        |      |      |
| HETATM | 5211 | H4 | PRP | 317 | 16.829 | 47.347 | 31.007 | 1.00 | 0.00 |
| H      |      |    |     |     |        |        |        |      |      |
| HETATM | 5212 | O2 | PRP | 317 | 17.876 | 49.136 | 31.008 | 1.00 | 0.00 |
| O      |      |    |     |     |        |        |        |      |      |
| HETATM | 5213 | H5 | PRP | 317 | 18.219 | 49.304 | 30.128 | 1.00 | 0.00 |
| H      |      |    |     |     |        |        |        |      |      |
| HETATM | 5214 | C3 | PRP | 317 | 16.016 | 48.800 | 29.615 | 1.00 | 0.00 |
| C      |      |    |     |     |        |        |        |      |      |
| HETATM | 5215 | H6 | PRP | 317 | 15.041 | 48.320 | 29.531 | 1.00 | 0.00 |
| H      |      |    |     |     |        |        |        |      |      |
| HETATM | 5216 | H7 | PRP | 317 | 16.030 | 49.889 | 29.579 | 1.00 | 0.00 |
| H      |      |    |     |     |        |        |        |      |      |
| HETATM | 5217 | H8 | PRP | 317 | 16.734 | 48.453 | 28.872 | 1.00 | 0.00 |
| H      |      |    |     |     |        |        |        |      |      |
| HETATM | 5218 | O1 | PRP | 318 | -5.067 | 18.363 | 33.562 | 1.00 | 0.00 |
| O      |      |    |     |     |        |        |        |      |      |
| HETATM | 5219 | H1 | PRP | 318 | -4.361 | 19.002 | 33.686 | 1.00 | 0.00 |
| H      |      |    |     |     |        |        |        |      |      |
| HETATM | 5220 | C1 | PRP | 318 | -4.599 | 17.502 | 32.536 | 1.00 | 0.00 |
| C      |      |    |     |     |        |        |        |      |      |
| HETATM | 5221 | H2 | PRP | 318 | -3.899 | 17.976 | 31.848 | 1.00 | 0.00 |
| H      |      |    |     |     |        |        |        |      |      |
| HETATM | 5222 | H3 | PRP | 318 | -4.066 | 16.716 | 33.071 | 1.00 | 0.00 |
| H      |      |    |     |     |        |        |        |      |      |
| HETATM | 5223 | C2 | PRP | 318 | -5.630 | 16.755 | 31.643 | 1.00 | 0.00 |
| C      |      |    |     |     |        |        |        |      |      |
| HETATM | 5224 | H4 | PRP | 318 | -6.208 | 17.449 | 31.032 | 1.00 | 0.00 |
| H      |      |    |     |     |        |        |        |      |      |
| HETATM | 5225 | O2 | PRP | 318 | -6.523 | 16.000 | 32.413 | 1.00 | 0.00 |
| O      |      |    |     |     |        |        |        |      |      |
| HETATM | 5226 | H5 | PRP | 318 | -7.062 | 16.537 | 32.998 | 1.00 | 0.00 |
| H      |      |    |     |     |        |        |        |      |      |
| HETATM | 5227 | C3 | PRP | 318 | -4.962 | 15.816 | 30.667 | 1.00 | 0.00 |
| C      |      |    |     |     |        |        |        |      |      |
| HETATM | 5228 | H6 | PRP | 318 | -4.305 | 15.099 | 31.159 | 1.00 | 0.00 |
| H      |      |    |     |     |        |        |        |      |      |
| HETATM | 5229 | H7 | PRP | 318 | -5.650 | 15.328 | 29.976 | 1.00 | 0.00 |
| H      |      |    |     |     |        |        |        |      |      |
| HETATM | 5230 | H8 | PRP | 318 | -4.304 | 16.388 | 30.013 | 1.00 | 0.00 |
| H      |      |    |     |     |        |        |        |      |      |
| HETATM | 5231 | O1 | PRP | 319 | 0.730  | 19.363 | 35.562 | 1.00 | 0.00 |
| O      |      |    |     |     |        |        |        |      |      |
| HETATM | 5232 | H1 | PRP | 319 | -0.123 | 19.790 | 35.455 | 1.00 | 0.00 |
| H      |      |    |     |     |        |        |        |      |      |
| HETATM | 5233 | C1 | PRP | 319 | 0.440  | 18.376 | 36.474 | 1.00 | 0.00 |
| C      |      |    |     |     |        |        |        |      |      |
| HETATM | 5234 | H2 | PRP | 319 | 1.321  | 17.792 | 36.741 | 1.00 | 0.00 |
| H      |      |    |     |     |        |        |        |      |      |
| HETATM | 5235 | H3 | PRP | 319 | 0.161  | 18.931 | 37.370 | 1.00 | 0.00 |
| H      |      |    |     |     |        |        |        |      |      |

|        |      |    |     |     |        |        |        |      |      |
|--------|------|----|-----|-----|--------|--------|--------|------|------|
| HETATM | 5236 | C2 | PRP | 319 | -0.767 | 17.532 | 36.007 | 1.00 | 0.00 |
| C      |      |    |     |     |        |        |        |      |      |
| HETATM | 5237 | H4 | PRP | 319 | -1.052 | 16.773 | 36.736 | 1.00 | 0.00 |
| H      |      |    |     |     |        |        |        |      |      |
| HETATM | 5238 | O2 | PRP | 319 | -0.539 | 16.998 | 34.781 | 1.00 | 0.00 |
| O      |      |    |     |     |        |        |        |      |      |
| HETATM | 5239 | H5 | PRP | 319 | 0.043  | 16.239 | 34.863 | 1.00 | 0.00 |
| H      |      |    |     |     |        |        |        |      |      |
| HETATM | 5240 | C3 | PRP | 319 | -1.994 | 18.480 | 35.804 | 1.00 | 0.00 |
| C      |      |    |     |     |        |        |        |      |      |
| HETATM | 5241 | H6 | PRP | 319 | -2.792 | 17.836 | 35.435 | 1.00 | 0.00 |
| H      |      |    |     |     |        |        |        |      |      |
| HETATM | 5242 | H7 | PRP | 319 | -2.273 | 18.990 | 36.726 | 1.00 | 0.00 |
| H      |      |    |     |     |        |        |        |      |      |
| HETATM | 5243 | H8 | PRP | 319 | -1.832 | 19.119 | 34.936 | 1.00 | 0.00 |
| H      |      |    |     |     |        |        |        |      |      |
| HETATM | 5244 | O1 | PRP | 320 | -3.175 | 18.379 | 27.916 | 1.00 | 0.00 |
| O      |      |    |     |     |        |        |        |      |      |
| HETATM | 5245 | H1 | PRP | 320 | -3.526 | 19.227 | 27.637 | 1.00 | 0.00 |
| H      |      |    |     |     |        |        |        |      |      |
| HETATM | 5246 | C1 | PRP | 320 | -1.950 | 18.041 | 27.225 | 1.00 | 0.00 |
| C      |      |    |     |     |        |        |        |      |      |
| HETATM | 5247 | H2 | PRP | 320 | -1.633 | 17.078 | 27.626 | 1.00 | 0.00 |
| H      |      |    |     |     |        |        |        |      |      |
| HETATM | 5248 | H3 | PRP | 320 | -2.225 | 17.994 | 26.172 | 1.00 | 0.00 |
| H      |      |    |     |     |        |        |        |      |      |
| HETATM | 5249 | C2 | PRP | 320 | -0.894 | 19.190 | 27.352 | 1.00 | 0.00 |
| C      |      |    |     |     |        |        |        |      |      |
| HETATM | 5250 | H4 | PRP | 320 | -0.455 | 19.236 | 28.348 | 1.00 | 0.00 |
| H      |      |    |     |     |        |        |        |      |      |
| HETATM | 5251 | O2 | PRP | 320 | -1.571 | 20.372 | 27.004 | 1.00 | 0.00 |
| O      |      |    |     |     |        |        |        |      |      |
| HETATM | 5252 | H5 | PRP | 320 | -2.000 | 20.678 | 27.806 | 1.00 | 0.00 |
| H      |      |    |     |     |        |        |        |      |      |
| HETATM | 5253 | C3 | PRP | 320 | 0.204  | 19.109 | 26.323 | 1.00 | 0.00 |
| C      |      |    |     |     |        |        |        |      |      |
| HETATM | 5254 | H6 | PRP | 320 | 0.761  | 18.176 | 26.417 | 1.00 | 0.00 |
| H      |      |    |     |     |        |        |        |      |      |
| HETATM | 5255 | H7 | PRP | 320 | -0.140 | 19.283 | 25.304 | 1.00 | 0.00 |
| H      |      |    |     |     |        |        |        |      |      |
| HETATM | 5256 | H8 | PRP | 320 | 0.851  | 19.969 | 26.496 | 1.00 | 0.00 |
| H      |      |    |     |     |        |        |        |      |      |
| HETATM | 5257 | O1 | PRP | 321 | 2.187  | 33.108 | 34.233 | 1.00 | 0.00 |
| O      |      |    |     |     |        |        |        |      |      |
| HETATM | 5258 | H1 | PRP | 321 | 2.695  | 33.505 | 34.945 | 1.00 | 0.00 |
| H      |      |    |     |     |        |        |        |      |      |
| HETATM | 5259 | C1 | PRP | 321 | 0.820  | 33.509 | 34.493 | 1.00 | 0.00 |
| C      |      |    |     |     |        |        |        |      |      |
| HETATM | 5260 | H2 | PRP | 321 | 0.798  | 34.569 | 34.748 | 1.00 | 0.00 |
| H      |      |    |     |     |        |        |        |      |      |
| HETATM | 5261 | H3 | PRP | 321 | 0.243  | 33.496 | 33.568 | 1.00 | 0.00 |
| H      |      |    |     |     |        |        |        |      |      |
| HETATM | 5262 | C2 | PRP | 321 | 0.122  | 32.588 | 35.536 | 1.00 | 0.00 |
| C      |      |    |     |     |        |        |        |      |      |
| HETATM | 5263 | H4 | PRP | 321 | 0.333  | 31.564 | 35.226 | 1.00 | 0.00 |
| H      |      |    |     |     |        |        |        |      |      |

|        |      |    |     |     |        |        |        |      |      |
|--------|------|----|-----|-----|--------|--------|--------|------|------|
| HETATM | 5264 | O2 | PRP | 321 | -1.305 | 32.829 | 35.544 | 1.00 | 0.00 |
| O      |      |    |     |     |        |        |        |      |      |
| HETATM | 5265 | H5 | PRP | 321 | -1.649 | 32.356 | 34.783 | 1.00 | 0.00 |
| H      |      |    |     |     |        |        |        |      |      |
| HETATM | 5266 | C3 | PRP | 321 | 0.731  | 32.811 | 36.960 | 1.00 | 0.00 |
| C      |      |    |     |     |        |        |        |      |      |
| HETATM | 5267 | H6 | PRP | 321 | 0.519  | 32.079 | 37.739 | 1.00 | 0.00 |
| H      |      |    |     |     |        |        |        |      |      |
| HETATM | 5268 | H7 | PRP | 321 | 1.806  | 32.808 | 36.785 | 1.00 | 0.00 |
| H      |      |    |     |     |        |        |        |      |      |
| HETATM | 5269 | H8 | PRP | 321 | 0.465  | 33.831 | 37.238 | 1.00 | 0.00 |
| H      |      |    |     |     |        |        |        |      |      |
| HETATM | 5270 | O1 | PRP | 322 | 23.491 | 37.389 | 35.440 | 1.00 | 0.00 |
| O      |      |    |     |     |        |        |        |      |      |
| HETATM | 5271 | H1 | PRP | 322 | 22.669 | 37.414 | 34.944 | 1.00 | 0.00 |
| H      |      |    |     |     |        |        |        |      |      |
| HETATM | 5272 | C1 | PRP | 322 | 24.070 | 36.115 | 35.407 | 1.00 | 0.00 |
| C      |      |    |     |     |        |        |        |      |      |
| HETATM | 5273 | H2 | PRP | 322 | 23.518 | 35.409 | 36.026 | 1.00 | 0.00 |
| H      |      |    |     |     |        |        |        |      |      |
| HETATM | 5274 | H3 | PRP | 322 | 23.987 | 35.842 | 34.355 | 1.00 | 0.00 |
| H      |      |    |     |     |        |        |        |      |      |
| HETATM | 5275 | C2 | PRP | 322 | 25.601 | 36.034 | 35.624 | 1.00 | 0.00 |
| C      |      |    |     |     |        |        |        |      |      |
| HETATM | 5276 | H4 | PRP | 322 | 25.880 | 36.395 | 36.614 | 1.00 | 0.00 |
| H      |      |    |     |     |        |        |        |      |      |
| HETATM | 5277 | O2 | PRP | 322 | 26.261 | 36.786 | 34.641 | 1.00 | 0.00 |
| O      |      |    |     |     |        |        |        |      |      |
| HETATM | 5278 | H5 | PRP | 322 | 25.608 | 37.422 | 34.339 | 1.00 | 0.00 |
| H      |      |    |     |     |        |        |        |      |      |
| HETATM | 5279 | C3 | PRP | 322 | 26.166 | 34.589 | 35.554 | 1.00 | 0.00 |
| C      |      |    |     |     |        |        |        |      |      |
| HETATM | 5280 | H6 | PRP | 322 | 25.553 | 34.033 | 34.846 | 1.00 | 0.00 |
| H      |      |    |     |     |        |        |        |      |      |
| HETATM | 5281 | H7 | PRP | 322 | 27.240 | 34.580 | 35.367 | 1.00 | 0.00 |
| H      |      |    |     |     |        |        |        |      |      |
| HETATM | 5282 | H8 | PRP | 322 | 26.036 | 34.212 | 36.569 | 1.00 | 0.00 |
| H      |      |    |     |     |        |        |        |      |      |
| HETATM | 5283 | O1 | PRP | 323 | 7.262  | 22.770 | 28.132 | 1.00 | 0.00 |
| O      |      |    |     |     |        |        |        |      |      |
| HETATM | 5284 | H1 | PRP | 323 | 6.745  | 22.272 | 27.496 | 1.00 | 0.00 |
| H      |      |    |     |     |        |        |        |      |      |
| HETATM | 5285 | C1 | PRP | 323 | 8.360  | 23.307 | 27.367 | 1.00 | 0.00 |
| C      |      |    |     |     |        |        |        |      |      |
| HETATM | 5286 | H2 | PRP | 323 | 9.140  | 22.585 | 27.123 | 1.00 | 0.00 |
| H      |      |    |     |     |        |        |        |      |      |
| HETATM | 5287 | H3 | PRP | 323 | 7.914  | 23.806 | 26.506 | 1.00 | 0.00 |
| H      |      |    |     |     |        |        |        |      |      |
| HETATM | 5288 | C2 | PRP | 323 | 8.987  | 24.377 | 28.199 | 1.00 | 0.00 |
| C      |      |    |     |     |        |        |        |      |      |
| HETATM | 5289 | H4 | PRP | 323 | 9.390  | 24.012 | 29.144 | 1.00 | 0.00 |
| H      |      |    |     |     |        |        |        |      |      |
| HETATM | 5290 | O2 | PRP | 323 | 8.104  | 25.452 | 28.363 | 1.00 | 0.00 |
| O      |      |    |     |     |        |        |        |      |      |
| HETATM | 5291 | H5 | PRP | 323 | 7.380  | 25.215 | 27.778 | 1.00 | 0.00 |
| H      |      |    |     |     |        |        |        |      |      |



|        |      |    |     |     |        |        |        |      |      |
|--------|------|----|-----|-----|--------|--------|--------|------|------|
| HETATM | 5292 | C3 | PRP | 323 | 10.165 | 24.888 | 27.368 | 1.00 | 0.00 |
| C      |      |    |     |     |        |        |        |      |      |
| HETATM | 5293 | H6 | PRP | 323 | 10.640 | 25.742 | 27.850 | 1.00 | 0.00 |
| H      |      |    |     |     |        |        |        |      |      |
| HETATM | 5294 | H7 | PRP | 323 | 10.890 | 24.083 | 27.243 | 1.00 | 0.00 |
| H      |      |    |     |     |        |        |        |      |      |
| HETATM | 5295 | H8 | PRP | 323 | 9.792  | 25.211 | 26.396 | 1.00 | 0.00 |
| H      |      |    |     |     |        |        |        |      |      |
| HETATM | 5296 | O1 | PRP | 324 | 17.619 | 42.585 | 18.452 | 1.00 | 0.00 |
| O      |      |    |     |     |        |        |        |      |      |
| HETATM | 5297 | H1 | PRP | 324 | 16.971 | 43.292 | 18.502 | 1.00 | 0.00 |
| H      |      |    |     |     |        |        |        |      |      |
| HETATM | 5298 | C1 | PRP | 324 | 17.156 | 41.791 | 17.354 | 1.00 | 0.00 |
| C      |      |    |     |     |        |        |        |      |      |
| HETATM | 5299 | H2 | PRP | 324 | 17.663 | 42.043 | 16.422 | 1.00 | 0.00 |
| H      |      |    |     |     |        |        |        |      |      |
| HETATM | 5300 | H3 | PRP | 324 | 17.313 | 40.745 | 17.618 | 1.00 | 0.00 |
| H      |      |    |     |     |        |        |        |      |      |
| HETATM | 5301 | C2 | PRP | 324 | 15.678 | 42.023 | 17.270 | 1.00 | 0.00 |
| C      |      |    |     |     |        |        |        |      |      |
| HETATM | 5302 | H4 | PRP | 324 | 15.255 | 41.520 | 16.401 | 1.00 | 0.00 |
| H      |      |    |     |     |        |        |        |      |      |
| HETATM | 5303 | O2 | PRP | 324 | 15.448 | 43.456 | 17.266 | 1.00 | 0.00 |
| O      |      |    |     |     |        |        |        |      |      |
| HETATM | 5304 | H5 | PRP | 324 | 14.497 | 43.578 | 17.230 | 1.00 | 0.00 |
| H      |      |    |     |     |        |        |        |      |      |
| HETATM | 5305 | C3 | PRP | 324 | 14.911 | 41.482 | 18.454 | 1.00 | 0.00 |
| C      |      |    |     |     |        |        |        |      |      |
| HETATM | 5306 | H6 | PRP | 324 | 15.452 | 41.745 | 19.363 | 1.00 | 0.00 |
| H      |      |    |     |     |        |        |        |      |      |
| HETATM | 5307 | H7 | PRP | 324 | 13.858 | 41.738 | 18.572 | 1.00 | 0.00 |
| H      |      |    |     |     |        |        |        |      |      |
| HETATM | 5308 | H8 | PRP | 324 | 14.991 | 40.405 | 18.310 | 1.00 | 0.00 |
| H      |      |    |     |     |        |        |        |      |      |
| HETATM | 5309 | O1 | PRP | 325 | 43.049 | 42.452 | 33.278 | 1.00 | 0.00 |
| O      |      |    |     |     |        |        |        |      |      |
| HETATM | 5310 | H1 | PRP | 325 | 43.150 | 41.604 | 33.716 | 1.00 | 0.00 |
| H      |      |    |     |     |        |        |        |      |      |
| HETATM | 5311 | C1 | PRP | 325 | 42.054 | 43.238 | 33.865 | 1.00 | 0.00 |
| C      |      |    |     |     |        |        |        |      |      |
| HETATM | 5312 | H2 | PRP | 325 | 42.136 | 43.272 | 34.952 | 1.00 | 0.00 |
| H      |      |    |     |     |        |        |        |      |      |
| HETATM | 5313 | H3 | PRP | 325 | 42.148 | 44.258 | 33.491 | 1.00 | 0.00 |
| H      |      |    |     |     |        |        |        |      |      |
| HETATM | 5314 | C2 | PRP | 325 | 40.620 | 42.893 | 33.401 | 1.00 | 0.00 |
| C      |      |    |     |     |        |        |        |      |      |
| HETATM | 5315 | H4 | PRP | 325 | 39.998 | 43.775 | 33.551 | 1.00 | 0.00 |
| H      |      |    |     |     |        |        |        |      |      |
| HETATM | 5316 | O2 | PRP | 325 | 40.294 | 41.792 | 34.199 | 1.00 | 0.00 |
| O      |      |    |     |     |        |        |        |      |      |
| HETATM | 5317 | H5 | PRP | 325 | 41.032 | 41.178 | 34.219 | 1.00 | 0.00 |
| H      |      |    |     |     |        |        |        |      |      |
| HETATM | 5318 | C3 | PRP | 325 | 40.448 | 42.517 | 31.938 | 1.00 | 0.00 |
| C      |      |    |     |     |        |        |        |      |      |
| HETATM | 5319 | H6 | PRP | 325 | 41.047 | 43.172 | 31.306 | 1.00 | 0.00 |
| H      |      |    |     |     |        |        |        |      |      |

|        |      |    |     |     |        |        |        |      |      |
|--------|------|----|-----|-----|--------|--------|--------|------|------|
| HETATM | 5320 | H7 | PRP | 325 | 40.991 | 41.609 | 31.678 | 1.00 | 0.00 |
| H      |      |    |     |     |        |        |        |      |      |
| HETATM | 5321 | H8 | PRP | 325 | 39.385 | 42.579 | 31.702 | 1.00 | 0.00 |
| H      |      |    |     |     |        |        |        |      |      |
| HETATM | 5322 | O1 | PRP | 326 | 20.459 | 51.438 | 44.815 | 1.00 | 0.00 |
| O      |      |    |     |     |        |        |        |      |      |
| HETATM | 5323 | H1 | PRP | 326 | 20.276 | 51.459 | 45.757 | 1.00 | 0.00 |
| H      |      |    |     |     |        |        |        |      |      |
| HETATM | 5324 | C1 | PRP | 326 | 21.845 | 51.694 | 44.654 | 1.00 | 0.00 |
| C      |      |    |     |     |        |        |        |      |      |
| HETATM | 5325 | H2 | PRP | 326 | 22.484 | 51.221 | 45.400 | 1.00 | 0.00 |
| H      |      |    |     |     |        |        |        |      |      |
| HETATM | 5326 | H3 | PRP | 326 | 22.325 | 51.350 | 43.737 | 1.00 | 0.00 |
| H      |      |    |     |     |        |        |        |      |      |
| HETATM | 5327 | C2 | PRP | 326 | 22.116 | 53.164 | 44.867 | 1.00 | 0.00 |
| C      |      |    |     |     |        |        |        |      |      |
| HETATM | 5328 | H4 | PRP | 326 | 21.348 | 53.557 | 45.534 | 1.00 | 0.00 |
| H      |      |    |     |     |        |        |        |      |      |
| HETATM | 5329 | O2 | PRP | 326 | 21.927 | 53.856 | 43.621 | 1.00 | 0.00 |
| O      |      |    |     |     |        |        |        |      |      |
| HETATM | 5330 | H5 | PRP | 326 | 21.073 | 54.292 | 43.656 | 1.00 | 0.00 |
| H      |      |    |     |     |        |        |        |      |      |
| HETATM | 5331 | C3 | PRP | 326 | 23.518 | 53.540 | 45.418 | 1.00 | 0.00 |
| C      |      |    |     |     |        |        |        |      |      |
| HETATM | 5332 | H6 | PRP | 326 | 23.592 | 54.627 | 45.399 | 1.00 | 0.00 |
| H      |      |    |     |     |        |        |        |      |      |
| HETATM | 5333 | H7 | PRP | 326 | 23.464 | 53.251 | 46.467 | 1.00 | 0.00 |
| H      |      |    |     |     |        |        |        |      |      |
| HETATM | 5334 | H8 | PRP | 326 | 24.329 | 53.007 | 44.922 | 1.00 | 0.00 |
| H      |      |    |     |     |        |        |        |      |      |
| HETATM | 5335 | O1 | PRP | 327 | 23.751 | 46.487 | 37.467 | 1.00 | 0.00 |
| O      |      |    |     |     |        |        |        |      |      |
| HETATM | 5336 | H1 | PRP | 327 | 24.644 | 46.341 | 37.146 | 1.00 | 0.00 |
| H      |      |    |     |     |        |        |        |      |      |
| HETATM | 5337 | C1 | PRP | 327 | 22.943 | 46.539 | 36.295 | 1.00 | 0.00 |
| C      |      |    |     |     |        |        |        |      |      |
| HETATM | 5338 | H2 | PRP | 327 | 21.906 | 46.397 | 36.598 | 1.00 | 0.00 |
| H      |      |    |     |     |        |        |        |      |      |
| HETATM | 5339 | H3 | PRP | 327 | 23.014 | 47.544 | 35.879 | 1.00 | 0.00 |
| H      |      |    |     |     |        |        |        |      |      |
| HETATM | 5340 | C2 | PRP | 327 | 23.361 | 45.475 | 35.245 | 1.00 | 0.00 |
| C      |      |    |     |     |        |        |        |      |      |
| HETATM | 5341 | H4 | PRP | 327 | 23.749 | 44.570 | 35.711 | 1.00 | 0.00 |
| H      |      |    |     |     |        |        |        |      |      |
| HETATM | 5342 | O2 | PRP | 327 | 24.440 | 46.038 | 34.532 | 1.00 | 0.00 |
| O      |      |    |     |     |        |        |        |      |      |
| HETATM | 5343 | H5 | PRP | 327 | 24.035 | 46.709 | 33.976 | 1.00 | 0.00 |
| H      |      |    |     |     |        |        |        |      |      |
| HETATM | 5344 | C3 | PRP | 327 | 22.193 | 45.110 | 34.341 | 1.00 | 0.00 |
| C      |      |    |     |     |        |        |        |      |      |
| HETATM | 5345 | H6 | PRP | 327 | 21.894 | 45.890 | 33.640 | 1.00 | 0.00 |
| H      |      |    |     |     |        |        |        |      |      |
| HETATM | 5346 | H7 | PRP | 327 | 22.467 | 44.238 | 33.747 | 1.00 | 0.00 |
| H      |      |    |     |     |        |        |        |      |      |
| HETATM | 5347 | H8 | PRP | 327 | 21.377 | 44.957 | 35.048 | 1.00 | 0.00 |
| H      |      |    |     |     |        |        |        |      |      |

|        |      |    |     |     |        |        |        |      |      |
|--------|------|----|-----|-----|--------|--------|--------|------|------|
| HETATM | 5348 | O1 | PRP | 328 | 24.852 | 50.913 | 25.324 | 1.00 | 0.00 |
| O      |      |    |     |     |        |        |        |      |      |
| HETATM | 5349 | H1 | PRP | 328 | 24.203 | 50.833 | 26.026 | 1.00 | 0.00 |
| H      |      |    |     |     |        |        |        |      |      |
| HETATM | 5350 | C1 | PRP | 328 | 25.982 | 51.559 | 25.921 | 1.00 | 0.00 |
| C      |      |    |     |     |        |        |        |      |      |
| HETATM | 5351 | H2 | PRP | 328 | 26.678 | 50.772 | 26.209 | 1.00 | 0.00 |
| H      |      |    |     |     |        |        |        |      |      |
| HETATM | 5352 | H3 | PRP | 328 | 26.464 | 52.233 | 25.213 | 1.00 | 0.00 |
| H      |      |    |     |     |        |        |        |      |      |
| HETATM | 5353 | C2 | PRP | 328 | 25.653 | 52.424 | 27.187 | 1.00 | 0.00 |
| C      |      |    |     |     |        |        |        |      |      |
| HETATM | 5354 | H4 | PRP | 328 | 26.546 | 52.799 | 27.687 | 1.00 | 0.00 |
| H      |      |    |     |     |        |        |        |      |      |
| HETATM | 5355 | O2 | PRP | 328 | 24.953 | 51.699 | 28.090 | 1.00 | 0.00 |
| O      |      |    |     |     |        |        |        |      |      |
| HETATM | 5356 | H5 | PRP | 328 | 24.679 | 52.195 | 28.865 | 1.00 | 0.00 |
| H      |      |    |     |     |        |        |        |      |      |
| HETATM | 5357 | C3 | PRP | 328 | 24.792 | 53.649 | 26.720 | 1.00 | 0.00 |
| C      |      |    |     |     |        |        |        |      |      |
| HETATM | 5358 | H6 | PRP | 328 | 25.283 | 54.152 | 25.887 | 1.00 | 0.00 |
| H      |      |    |     |     |        |        |        |      |      |
| HETATM | 5359 | H7 | PRP | 328 | 23.832 | 53.351 | 26.298 | 1.00 | 0.00 |
| H      |      |    |     |     |        |        |        |      |      |
| HETATM | 5360 | H8 | PRP | 328 | 24.677 | 54.441 | 27.460 | 1.00 | 0.00 |
| H      |      |    |     |     |        |        |        |      |      |
| HETATM | 5361 | O1 | PRP | 329 | 39.253 | 60.864 | 34.075 | 1.00 | 0.00 |
| O      |      |    |     |     |        |        |        |      |      |
| HETATM | 5362 | H1 | PRP | 329 | 39.451 | 60.315 | 33.313 | 1.00 | 0.00 |
| H      |      |    |     |     |        |        |        |      |      |
| HETATM | 5363 | C1 | PRP | 329 | 38.551 | 59.973 | 34.938 | 1.00 | 0.00 |
| C      |      |    |     |     |        |        |        |      |      |
| HETATM | 5364 | H2 | PRP | 329 | 38.638 | 60.374 | 35.947 | 1.00 | 0.00 |
| H      |      |    |     |     |        |        |        |      |      |
| HETATM | 5365 | H3 | PRP | 329 | 37.489 | 60.134 | 34.753 | 1.00 | 0.00 |
| H      |      |    |     |     |        |        |        |      |      |
| HETATM | 5366 | C2 | PRP | 329 | 38.961 | 58.471 | 34.856 | 1.00 | 0.00 |
| C      |      |    |     |     |        |        |        |      |      |
| HETATM | 5367 | H4 | PRP | 329 | 38.290 | 57.895 | 35.493 | 1.00 | 0.00 |
| H      |      |    |     |     |        |        |        |      |      |
| HETATM | 5368 | O2 | PRP | 329 | 40.248 | 58.390 | 35.406 | 1.00 | 0.00 |
| O      |      |    |     |     |        |        |        |      |      |
| HETATM | 5369 | H5 | PRP | 329 | 40.496 | 59.309 | 35.531 | 1.00 | 0.00 |
| H      |      |    |     |     |        |        |        |      |      |
| HETATM | 5370 | C3 | PRP | 329 | 38.958 | 57.931 | 33.437 | 1.00 | 0.00 |
| C      |      |    |     |     |        |        |        |      |      |
| HETATM | 5371 | H6 | PRP | 329 | 37.944 | 57.990 | 33.042 | 1.00 | 0.00 |
| H      |      |    |     |     |        |        |        |      |      |
| HETATM | 5372 | H7 | PRP | 329 | 39.566 | 58.549 | 32.775 | 1.00 | 0.00 |
| H      |      |    |     |     |        |        |        |      |      |
| HETATM | 5373 | H8 | PRP | 329 | 39.312 | 56.900 | 33.405 | 1.00 | 0.00 |
| H      |      |    |     |     |        |        |        |      |      |
| HETATM | 5374 | O1 | PRP | 330 | 15.116 | 41.963 | 29.763 | 1.00 | 0.00 |
| O      |      |    |     |     |        |        |        |      |      |
| HETATM | 5375 | H1 | PRP | 330 | 14.733 | 41.982 | 30.643 | 1.00 | 0.00 |
| H      |      |    |     |     |        |        |        |      |      |

|        |      |    |     |     |        |        |        |      |      |
|--------|------|----|-----|-----|--------|--------|--------|------|------|
| HETATM | 5376 | C1 | PRP | 330 | 15.906 | 40.731 | 29.707 | 1.00 | 0.00 |
| C      |      |    |     |     |        |        |        |      |      |
| HETATM | 5377 | H2 | PRP | 330 | 16.309 | 40.693 | 28.695 | 1.00 | 0.00 |
| H      |      |    |     |     |        |        |        |      |      |
| HETATM | 5378 | H3 | PRP | 330 | 16.678 | 40.887 | 30.460 | 1.00 | 0.00 |
| H      |      |    |     |     |        |        |        |      |      |
| HETATM | 5379 | C2 | PRP | 330 | 14.957 | 39.543 | 30.054 | 1.00 | 0.00 |
| C      |      |    |     |     |        |        |        |      |      |
| HETATM | 5380 | H4 | PRP | 330 | 14.025 | 39.692 | 29.509 | 1.00 | 0.00 |
| H      |      |    |     |     |        |        |        |      |      |
| HETATM | 5381 | O2 | PRP | 330 | 14.744 | 39.346 | 31.434 | 1.00 | 0.00 |
| O      |      |    |     |     |        |        |        |      |      |
| HETATM | 5382 | H5 | PRP | 330 | 14.325 | 40.122 | 31.814 | 1.00 | 0.00 |
| H      |      |    |     |     |        |        |        |      |      |
| HETATM | 5383 | C3 | PRP | 330 | 15.681 | 38.330 | 29.531 | 1.00 | 0.00 |
| C      |      |    |     |     |        |        |        |      |      |
| HETATM | 5384 | H6 | PRP | 330 | 15.941 | 38.529 | 28.492 | 1.00 | 0.00 |
| H      |      |    |     |     |        |        |        |      |      |
| HETATM | 5385 | H7 | PRP | 330 | 16.623 | 38.146 | 30.048 | 1.00 | 0.00 |
| H      |      |    |     |     |        |        |        |      |      |
| HETATM | 5386 | H8 | PRP | 330 | 15.184 | 37.367 | 29.654 | 1.00 | 0.00 |
| H      |      |    |     |     |        |        |        |      |      |
| HETATM | 5387 | O1 | PRP | 331 | 22.790 | 43.842 | 48.693 | 1.00 | 0.00 |
| O      |      |    |     |     |        |        |        |      |      |
| HETATM | 5388 | H1 | PRP | 331 | 23.058 | 43.993 | 49.602 | 1.00 | 0.00 |
| H      |      |    |     |     |        |        |        |      |      |
| HETATM | 5389 | C1 | PRP | 331 | 21.397 | 43.676 | 48.738 | 1.00 | 0.00 |
| C      |      |    |     |     |        |        |        |      |      |
| HETATM | 5390 | H2 | PRP | 331 | 21.148 | 42.638 | 48.958 | 1.00 | 0.00 |
| H      |      |    |     |     |        |        |        |      |      |
| HETATM | 5391 | H3 | PRP | 331 | 20.945 | 44.337 | 49.478 | 1.00 | 0.00 |
| H      |      |    |     |     |        |        |        |      |      |
| HETATM | 5392 | C2 | PRP | 331 | 20.792 | 43.979 | 47.340 | 1.00 | 0.00 |
| C      |      |    |     |     |        |        |        |      |      |
| HETATM | 5393 | H4 | PRP | 331 | 21.131 | 43.275 | 46.580 | 1.00 | 0.00 |
| H      |      |    |     |     |        |        |        |      |      |
| HETATM | 5394 | O2 | PRP | 331 | 21.099 | 45.316 | 47.131 | 1.00 | 0.00 |
| O      |      |    |     |     |        |        |        |      |      |
| HETATM | 5395 | H5 | PRP | 331 | 22.025 | 45.485 | 46.946 | 1.00 | 0.00 |
| H      |      |    |     |     |        |        |        |      |      |
| HETATM | 5396 | C3 | PRP | 331 | 19.275 | 43.888 | 47.397 | 1.00 | 0.00 |
| C      |      |    |     |     |        |        |        |      |      |
| HETATM | 5397 | H6 | PRP | 331 | 18.819 | 44.829 | 47.705 | 1.00 | 0.00 |
| H      |      |    |     |     |        |        |        |      |      |
| HETATM | 5398 | H7 | PRP | 331 | 18.880 | 43.804 | 46.384 | 1.00 | 0.00 |
| H      |      |    |     |     |        |        |        |      |      |
| HETATM | 5399 | H8 | PRP | 331 | 18.956 | 42.956 | 47.863 | 1.00 | 0.00 |
| H      |      |    |     |     |        |        |        |      |      |
| HETATM | 5400 | O1 | PRP | 332 | 10.973 | 36.506 | 17.023 | 1.00 | 0.00 |
| O      |      |    |     |     |        |        |        |      |      |
| HETATM | 5401 | H1 | PRP | 332 | 11.273 | 35.763 | 17.552 | 1.00 | 0.00 |
| H      |      |    |     |     |        |        |        |      |      |
| HETATM | 5402 | C1 | PRP | 332 | 10.763 | 37.558 | 17.978 | 1.00 | 0.00 |
| C      |      |    |     |     |        |        |        |      |      |
| HETATM | 5403 | H2 | PRP | 332 | 9.958  | 37.236 | 18.639 | 1.00 | 0.00 |
| H      |      |    |     |     |        |        |        |      |      |

|        |      |    |     |     |        |        |        |      |      |
|--------|------|----|-----|-----|--------|--------|--------|------|------|
| HETATM | 5404 | H3 | PRP | 332 | 11.671 | 37.821 | 18.521 | 1.00 | 0.00 |
| H      |      |    |     |     |        |        |        |      |      |
| HETATM | 5405 | C2 | PRP | 332 | 10.308 | 38.772 | 17.116 | 1.00 | 0.00 |
| C      |      |    |     |     |        |        |        |      |      |
| HETATM | 5406 | H4 | PRP | 332 | 9.318  | 38.617 | 16.688 | 1.00 | 0.00 |
| H      |      |    |     |     |        |        |        |      |      |
| HETATM | 5407 | O2 | PRP | 332 | 11.326 | 39.005 | 16.158 | 1.00 | 0.00 |
| O      |      |    |     |     |        |        |        |      |      |
| HETATM | 5408 | H5 | PRP | 332 | 11.763 | 38.150 | 16.152 | 1.00 | 0.00 |
| H      |      |    |     |     |        |        |        |      |      |
| HETATM | 5409 | C3 | PRP | 332 | 10.093 | 39.944 | 18.034 | 1.00 | 0.00 |
| C      |      |    |     |     |        |        |        |      |      |
| HETATM | 5410 | H6 | PRP | 332 | 11.066 | 40.102 | 18.499 | 1.00 | 0.00 |
| H      |      |    |     |     |        |        |        |      |      |
| HETATM | 5411 | H7 | PRP | 332 | 9.868  | 40.849 | 17.470 | 1.00 | 0.00 |
| H      |      |    |     |     |        |        |        |      |      |
| HETATM | 5412 | H8 | PRP | 332 | 9.335  | 39.708 | 18.782 | 1.00 | 0.00 |
| H      |      |    |     |     |        |        |        |      |      |
| HETATM | 5413 | O1 | PRP | 333 | 18.426 | 49.151 | 39.344 | 1.00 | 0.00 |
| O      |      |    |     |     |        |        |        |      |      |
| HETATM | 5414 | H1 | PRP | 333 | 18.445 | 48.599 | 40.130 | 1.00 | 0.00 |
| H      |      |    |     |     |        |        |        |      |      |
| HETATM | 5415 | C1 | PRP | 333 | 19.041 | 48.396 | 38.369 | 1.00 | 0.00 |
| C      |      |    |     |     |        |        |        |      |      |
| HETATM | 5416 | H2 | PRP | 333 | 18.608 | 48.762 | 37.438 | 1.00 | 0.00 |
| H      |      |    |     |     |        |        |        |      |      |
| HETATM | 5417 | H3 | PRP | 333 | 20.108 | 48.618 | 38.372 | 1.00 | 0.00 |
| H      |      |    |     |     |        |        |        |      |      |
| HETATM | 5418 | C2 | PRP | 333 | 18.752 | 46.906 | 38.532 | 1.00 | 0.00 |
| C      |      |    |     |     |        |        |        |      |      |
| HETATM | 5419 | H4 | PRP | 333 | 19.422 | 46.333 | 37.891 | 1.00 | 0.00 |
| H      |      |    |     |     |        |        |        |      |      |
| HETATM | 5420 | O2 | PRP | 333 | 17.397 | 46.433 | 38.407 | 1.00 | 0.00 |
| O      |      |    |     |     |        |        |        |      |      |
| HETATM | 5421 | H5 | PRP | 333 | 16.701 | 46.855 | 38.917 | 1.00 | 0.00 |
| H      |      |    |     |     |        |        |        |      |      |
| HETATM | 5422 | C3 | PRP | 333 | 19.299 | 46.489 | 39.940 | 1.00 | 0.00 |
| C      |      |    |     |     |        |        |        |      |      |
| HETATM | 5423 | H6 | PRP | 333 | 20.231 | 46.991 | 40.203 | 1.00 | 0.00 |
| H      |      |    |     |     |        |        |        |      |      |
| HETATM | 5424 | H7 | PRP | 333 | 18.641 | 46.524 | 40.808 | 1.00 | 0.00 |
| H      |      |    |     |     |        |        |        |      |      |
| HETATM | 5425 | H8 | PRP | 333 | 19.618 | 45.448 | 39.999 | 1.00 | 0.00 |
| H      |      |    |     |     |        |        |        |      |      |
| HETATM | 5426 | O1 | PRP | 334 | 20.650 | 56.715 | 38.585 | 1.00 | 0.00 |
| O      |      |    |     |     |        |        |        |      |      |
| HETATM | 5427 | H1 | PRP | 334 | 21.184 | 57.274 | 38.017 | 1.00 | 0.00 |
| H      |      |    |     |     |        |        |        |      |      |
| HETATM | 5428 | C1 | PRP | 334 | 19.843 | 56.017 | 37.717 | 1.00 | 0.00 |
| C      |      |    |     |     |        |        |        |      |      |
| HETATM | 5429 | H2 | PRP | 334 | 18.863 | 55.836 | 38.159 | 1.00 | 0.00 |
| H      |      |    |     |     |        |        |        |      |      |
| HETATM | 5430 | H3 | PRP | 334 | 19.746 | 56.638 | 36.826 | 1.00 | 0.00 |
| H      |      |    |     |     |        |        |        |      |      |
| HETATM | 5431 | C2 | PRP | 334 | 20.348 | 54.575 | 37.263 | 1.00 | 0.00 |
| C      |      |    |     |     |        |        |        |      |      |

|        |      |    |     |     |        |        |        |      |      |
|--------|------|----|-----|-----|--------|--------|--------|------|------|
| HETATM | 5432 | H4 | PRP | 334 | 19.528 | 54.084 | 36.740 | 1.00 | 0.00 |
| H      |      |    |     |     |        |        |        |      |      |
| HETATM | 5433 | O2 | PRP | 334 | 20.866 | 53.987 | 38.401 | 1.00 | 0.00 |
| O      |      |    |     |     |        |        |        |      |      |
| HETATM | 5434 | H5 | PRP | 334 | 20.911 | 54.690 | 39.053 | 1.00 | 0.00 |
| H      |      |    |     |     |        |        |        |      |      |
| HETATM | 5435 | C3 | PRP | 334 | 21.444 | 54.643 | 36.257 | 1.00 | 0.00 |
| C      |      |    |     |     |        |        |        |      |      |
| HETATM | 5436 | H6 | PRP | 334 | 21.862 | 53.683 | 35.955 | 1.00 | 0.00 |
| H      |      |    |     |     |        |        |        |      |      |
| HETATM | 5437 | H7 | PRP | 334 | 21.043 | 55.066 | 35.335 | 1.00 | 0.00 |
| H      |      |    |     |     |        |        |        |      |      |
| HETATM | 5438 | H8 | PRP | 334 | 22.149 | 55.369 | 36.662 | 1.00 | 0.00 |
| H      |      |    |     |     |        |        |        |      |      |
| HETATM | 5439 | O1 | PRP | 335 | 12.856 | 42.867 | 24.864 | 1.00 | 0.00 |
| O      |      |    |     |     |        |        |        |      |      |
| HETATM | 5440 | H1 | PRP | 335 | 12.475 | 43.581 | 24.349 | 1.00 | 0.00 |
| H      |      |    |     |     |        |        |        |      |      |
| HETATM | 5441 | C1 | PRP | 335 | 13.648 | 43.457 | 25.799 | 1.00 | 0.00 |
| C      |      |    |     |     |        |        |        |      |      |
| HETATM | 5442 | H2 | PRP | 335 | 14.434 | 42.809 | 26.186 | 1.00 | 0.00 |
| H      |      |    |     |     |        |        |        |      |      |
| HETATM | 5443 | H3 | PRP | 335 | 14.133 | 44.349 | 25.403 | 1.00 | 0.00 |
| H      |      |    |     |     |        |        |        |      |      |
| HETATM | 5444 | C2 | PRP | 335 | 12.770 | 43.898 | 26.913 | 1.00 | 0.00 |
| C      |      |    |     |     |        |        |        |      |      |
| HETATM | 5445 | H4 | PRP | 335 | 12.173 | 43.005 | 27.094 | 1.00 | 0.00 |
| H      |      |    |     |     |        |        |        |      |      |
| HETATM | 5446 | O2 | PRP | 335 | 12.006 | 44.966 | 26.436 | 1.00 | 0.00 |
| O      |      |    |     |     |        |        |        |      |      |
| HETATM | 5447 | H5 | PRP | 335 | 11.349 | 44.994 | 27.135 | 1.00 | 0.00 |
| H      |      |    |     |     |        |        |        |      |      |
| HETATM | 5448 | C3 | PRP | 335 | 13.515 | 44.224 | 28.220 | 1.00 | 0.00 |
| C      |      |    |     |     |        |        |        |      |      |
| HETATM | 5449 | H6 | PRP | 335 | 13.559 | 45.305 | 28.352 | 1.00 | 0.00 |
| H      |      |    |     |     |        |        |        |      |      |
| HETATM | 5450 | H7 | PRP | 335 | 12.871 | 43.944 | 29.054 | 1.00 | 0.00 |
| H      |      |    |     |     |        |        |        |      |      |
| HETATM | 5451 | H8 | PRP | 335 | 14.478 | 43.714 | 28.243 | 1.00 | 0.00 |
| H      |      |    |     |     |        |        |        |      |      |
| HETATM | 5452 | O1 | PRP | 336 | 26.541 | 49.416 | 28.308 | 1.00 | 0.00 |
| O      |      |    |     |     |        |        |        |      |      |
| HETATM | 5453 | H1 | PRP | 336 | 25.731 | 49.898 | 28.490 | 1.00 | 0.00 |
| H      |      |    |     |     |        |        |        |      |      |
| HETATM | 5454 | C1 | PRP | 336 | 26.192 | 48.221 | 27.644 | 1.00 | 0.00 |
| C      |      |    |     |     |        |        |        |      |      |
| HETATM | 5455 | H2 | PRP | 336 | 25.537 | 47.582 | 28.235 | 1.00 | 0.00 |
| H      |      |    |     |     |        |        |        |      |      |
| HETATM | 5456 | H3 | PRP | 336 | 25.517 | 48.525 | 26.844 | 1.00 | 0.00 |
| H      |      |    |     |     |        |        |        |      |      |
| HETATM | 5457 | C2 | PRP | 336 | 27.445 | 47.421 | 27.031 | 1.00 | 0.00 |
| C      |      |    |     |     |        |        |        |      |      |
| HETATM | 5458 | H4 | PRP | 336 | 27.065 | 46.700 | 26.308 | 1.00 | 0.00 |
| H      |      |    |     |     |        |        |        |      |      |
| HETATM | 5459 | O2 | PRP | 336 | 28.122 | 46.718 | 28.055 | 1.00 | 0.00 |
| O      |      |    |     |     |        |        |        |      |      |

|        |      |    |     |     |        |        |        |      |      |
|--------|------|----|-----|-----|--------|--------|--------|------|------|
| HETATM | 5460 | H5 | PRP | 336 | 28.171 | 47.359 | 28.768 | 1.00 | 0.00 |
| H      |      |    |     |     |        |        |        |      |      |
| HETATM | 5461 | C3 | PRP | 336 | 28.410 | 48.330 | 26.164 | 1.00 | 0.00 |
| C      |      |    |     |     |        |        |        |      |      |
| HETATM | 5462 | H6 | PRP | 336 | 27.935 | 48.824 | 25.316 | 1.00 | 0.00 |
| H      |      |    |     |     |        |        |        |      |      |
| HETATM | 5463 | H7 | PRP | 336 | 28.880 | 49.076 | 26.806 | 1.00 | 0.00 |
| H      |      |    |     |     |        |        |        |      |      |
| HETATM | 5464 | H8 | PRP | 336 | 29.209 | 47.661 | 25.846 | 1.00 | 0.00 |
| H      |      |    |     |     |        |        |        |      |      |
| HETATM | 5465 | O1 | PRP | 337 | 34.373 | 53.852 | 27.861 | 1.00 | 0.00 |
| O      |      |    |     |     |        |        |        |      |      |
| HETATM | 5466 | H1 | PRP | 337 | 34.544 | 54.253 | 27.006 | 1.00 | 0.00 |
| H      |      |    |     |     |        |        |        |      |      |
| HETATM | 5467 | C1 | PRP | 337 | 33.200 | 54.541 | 28.142 | 1.00 | 0.00 |
| C      |      |    |     |     |        |        |        |      |      |
| HETATM | 5468 | H2 | PRP | 337 | 33.015 | 54.544 | 29.216 | 1.00 | 0.00 |
| H      |      |    |     |     |        |        |        |      |      |
| HETATM | 5469 | H3 | PRP | 337 | 33.285 | 55.494 | 27.619 | 1.00 | 0.00 |
| H      |      |    |     |     |        |        |        |      |      |
| HETATM | 5470 | C2 | PRP | 337 | 32.015 | 53.727 | 27.530 | 1.00 | 0.00 |
| C      |      |    |     |     |        |        |        |      |      |
| HETATM | 5471 | H4 | PRP | 337 | 32.366 | 52.719 | 27.748 | 1.00 | 0.00 |
| H      |      |    |     |     |        |        |        |      |      |
| HETATM | 5472 | O2 | PRP | 337 | 31.839 | 54.070 | 26.196 | 1.00 | 0.00 |
| O      |      |    |     |     |        |        |        |      |      |
| HETATM | 5473 | H5 | PRP | 337 | 31.922 | 53.211 | 25.776 | 1.00 | 0.00 |
| H      |      |    |     |     |        |        |        |      |      |
| HETATM | 5474 | C3 | PRP | 337 | 30.772 | 54.038 | 28.396 | 1.00 | 0.00 |
| C      |      |    |     |     |        |        |        |      |      |
| HETATM | 5475 | H6 | PRP | 337 | 30.387 | 55.037 | 28.193 | 1.00 | 0.00 |
| H      |      |    |     |     |        |        |        |      |      |
| HETATM | 5476 | H7 | PRP | 337 | 29.982 | 53.368 | 28.056 | 1.00 | 0.00 |
| H      |      |    |     |     |        |        |        |      |      |
| HETATM | 5477 | H8 | PRP | 337 | 31.022 | 54.009 | 29.456 | 1.00 | 0.00 |
| H      |      |    |     |     |        |        |        |      |      |
| HETATM | 5478 | O1 | PRP | 338 | 14.915 | 43.784 | 32.304 | 1.00 | 0.00 |
| O      |      |    |     |     |        |        |        |      |      |
| HETATM | 5479 | H1 | PRP | 338 | 15.648 | 44.292 | 32.660 | 1.00 | 0.00 |
| H      |      |    |     |     |        |        |        |      |      |
| HETATM | 5480 | C1 | PRP | 338 | 13.904 | 43.751 | 33.353 | 1.00 | 0.00 |
| C      |      |    |     |     |        |        |        |      |      |
| HETATM | 5481 | H2 | PRP | 338 | 13.372 | 42.810 | 33.494 | 1.00 | 0.00 |
| H      |      |    |     |     |        |        |        |      |      |
| HETATM | 5482 | H3 | PRP | 338 | 14.326 | 43.926 | 34.343 | 1.00 | 0.00 |
| H      |      |    |     |     |        |        |        |      |      |
| HETATM | 5483 | C2 | PRP | 338 | 12.880 | 44.782 | 32.979 | 1.00 | 0.00 |
| C      |      |    |     |     |        |        |        |      |      |
| HETATM | 5484 | H4 | PRP | 338 | 12.548 | 44.446 | 31.997 | 1.00 | 0.00 |
| H      |      |    |     |     |        |        |        |      |      |
| HETATM | 5485 | O2 | PRP | 338 | 13.533 | 45.999 | 32.824 | 1.00 | 0.00 |
| O      |      |    |     |     |        |        |        |      |      |
| HETATM | 5486 | H5 | PRP | 338 | 14.463 | 45.911 | 33.046 | 1.00 | 0.00 |
| H      |      |    |     |     |        |        |        |      |      |
| HETATM | 5487 | C3 | PRP | 338 | 11.710 | 44.937 | 33.947 | 1.00 | 0.00 |
| C      |      |    |     |     |        |        |        |      |      |

|        |      |    |     |     |        |        |        |      |      |
|--------|------|----|-----|-----|--------|--------|--------|------|------|
| HETATM | 5488 | H6 | PRP | 338 | 11.118 | 45.744 | 33.515 | 1.00 | 0.00 |
| H      |      |    |     |     |        |        |        |      |      |
| HETATM | 5489 | H7 | PRP | 338 | 11.008 | 44.106 | 34.009 | 1.00 | 0.00 |
| H      |      |    |     |     |        |        |        |      |      |
| HETATM | 5490 | H8 | PRP | 338 | 12.064 | 45.436 | 34.849 | 1.00 | 0.00 |
| H      |      |    |     |     |        |        |        |      |      |
| HETATM | 5491 | O1 | PRP | 339 | 39.300 | 58.316 | 26.838 | 1.00 | 0.00 |
| O      |      |    |     |     |        |        |        |      |      |
| HETATM | 5492 | H1 | PRP | 339 | 38.633 | 57.625 | 26.830 | 1.00 | 0.00 |
| H      |      |    |     |     |        |        |        |      |      |
| HETATM | 5493 | C1 | PRP | 339 | 38.726 | 59.180 | 25.860 | 1.00 | 0.00 |
| C      |      |    |     |     |        |        |        |      |      |
| HETATM | 5494 | H2 | PRP | 339 | 37.823 | 58.750 | 25.428 | 1.00 | 0.00 |
| H      |      |    |     |     |        |        |        |      |      |
| HETATM | 5495 | H3 | PRP | 339 | 38.412 | 60.092 | 26.367 | 1.00 | 0.00 |
| H      |      |    |     |     |        |        |        |      |      |
| HETATM | 5496 | C2 | PRP | 339 | 39.727 | 59.566 | 24.734 | 1.00 | 0.00 |
| C      |      |    |     |     |        |        |        |      |      |
| HETATM | 5497 | H4 | PRP | 339 | 39.888 | 58.666 | 24.140 | 1.00 | 0.00 |
| H      |      |    |     |     |        |        |        |      |      |
| HETATM | 5498 | O2 | PRP | 339 | 40.902 | 60.077 | 25.327 | 1.00 | 0.00 |
| O      |      |    |     |     |        |        |        |      |      |
| HETATM | 5499 | H5 | PRP | 339 | 41.674 | 60.072 | 24.757 | 1.00 | 0.00 |
| H      |      |    |     |     |        |        |        |      |      |
| HETATM | 5500 | C3 | PRP | 339 | 39.138 | 60.696 | 23.884 | 1.00 | 0.00 |
| C      |      |    |     |     |        |        |        |      |      |
| HETATM | 5501 | H6 | PRP | 339 | 39.791 | 61.075 | 23.097 | 1.00 | 0.00 |
| H      |      |    |     |     |        |        |        |      |      |
| HETATM | 5502 | H7 | PRP | 339 | 38.239 | 60.329 | 23.389 | 1.00 | 0.00 |
| H      |      |    |     |     |        |        |        |      |      |
| HETATM | 5503 | H8 | PRP | 339 | 38.966 | 61.592 | 24.479 | 1.00 | 0.00 |
| H      |      |    |     |     |        |        |        |      |      |
| HETATM | 5504 | O1 | PRP | 340 | 31.548 | 45.440 | 32.858 | 1.00 | 0.00 |
| O      |      |    |     |     |        |        |        |      |      |
| HETATM | 5505 | H1 | PRP | 340 | 32.333 | 44.927 | 32.654 | 1.00 | 0.00 |
| H      |      |    |     |     |        |        |        |      |      |
| HETATM | 5506 | C1 | PRP | 340 | 31.640 | 45.785 | 34.284 | 1.00 | 0.00 |
| C      |      |    |     |     |        |        |        |      |      |
| HETATM | 5507 | H2 | PRP | 340 | 30.673 | 45.671 | 34.772 | 1.00 | 0.00 |
| H      |      |    |     |     |        |        |        |      |      |
| HETATM | 5508 | H3 | PRP | 340 | 32.381 | 45.100 | 34.697 | 1.00 | 0.00 |
| H      |      |    |     |     |        |        |        |      |      |
| HETATM | 5509 | C2 | PRP | 340 | 32.062 | 47.230 | 34.549 | 1.00 | 0.00 |
| C      |      |    |     |     |        |        |        |      |      |
| HETATM | 5510 | H4 | PRP | 340 | 32.149 | 47.537 | 35.591 | 1.00 | 0.00 |
| H      |      |    |     |     |        |        |        |      |      |
| HETATM | 5511 | O2 | PRP | 340 | 30.995 | 47.953 | 34.006 | 1.00 | 0.00 |
| O      |      |    |     |     |        |        |        |      |      |
| HETATM | 5512 | H5 | PRP | 340 | 30.957 | 47.603 | 33.113 | 1.00 | 0.00 |
| H      |      |    |     |     |        |        |        |      |      |
| HETATM | 5513 | C3 | PRP | 340 | 33.379 | 47.538 | 33.842 | 1.00 | 0.00 |
| C      |      |    |     |     |        |        |        |      |      |
| HETATM | 5514 | H6 | PRP | 340 | 34.129 | 46.810 | 34.151 | 1.00 | 0.00 |
| H      |      |    |     |     |        |        |        |      |      |
| HETATM | 5515 | H7 | PRP | 340 | 33.208 | 47.444 | 32.770 | 1.00 | 0.00 |
| H      |      |    |     |     |        |        |        |      |      |



|        |      |    |     |     |        |        |        |      |      |
|--------|------|----|-----|-----|--------|--------|--------|------|------|
| HETATM | 5516 | H8 | PRP | 340 | 33.749 | 48.540 | 34.057 | 1.00 | 0.00 |
| H      |      |    |     |     |        |        |        |      |      |
| HETATM | 5517 | O1 | PRP | 341 | 10.144 | 41.281 | 48.985 | 1.00 | 0.00 |
| O      |      |    |     |     |        |        |        |      |      |
| HETATM | 5518 | H1 | PRP | 341 | 10.903 | 41.140 | 48.413 | 1.00 | 0.00 |
| H      |      |    |     |     |        |        |        |      |      |
| HETATM | 5519 | C1 | PRP | 341 | 9.844  | 42.627 | 48.667 | 1.00 | 0.00 |
| C      |      |    |     |     |        |        |        |      |      |
| HETATM | 5520 | H2 | PRP | 341 | 8.787  | 42.866 | 48.547 | 1.00 | 0.00 |
| H      |      |    |     |     |        |        |        |      |      |
| HETATM | 5521 | H3 | PRP | 341 | 10.228 | 43.186 | 49.521 | 1.00 | 0.00 |
| H      |      |    |     |     |        |        |        |      |      |
| HETATM | 5522 | C2 | PRP | 341 | 10.550 | 43.047 | 47.384 | 1.00 | 0.00 |
| C      |      |    |     |     |        |        |        |      |      |
| HETATM | 5523 | H4 | PRP | 341 | 10.289 | 42.412 | 46.538 | 1.00 | 0.00 |
| H      |      |    |     |     |        |        |        |      |      |
| HETATM | 5524 | O2 | PRP | 341 | 11.940 | 42.899 | 47.647 | 1.00 | 0.00 |
| O      |      |    |     |     |        |        |        |      |      |
| HETATM | 5525 | H5 | PRP | 341 | 12.447 | 42.839 | 46.834 | 1.00 | 0.00 |
| H      |      |    |     |     |        |        |        |      |      |
| HETATM | 5526 | C3 | PRP | 341 | 10.187 | 44.519 | 47.152 | 1.00 | 0.00 |
| C      |      |    |     |     |        |        |        |      |      |
| HETATM | 5527 | H6 | PRP | 341 | 9.104  | 44.574 | 47.046 | 1.00 | 0.00 |
| H      |      |    |     |     |        |        |        |      |      |
| HETATM | 5528 | H7 | PRP | 341 | 10.503 | 45.139 | 47.991 | 1.00 | 0.00 |
| H      |      |    |     |     |        |        |        |      |      |
| HETATM | 5529 | H8 | PRP | 341 | 10.660 | 44.978 | 46.284 | 1.00 | 0.00 |
| H      |      |    |     |     |        |        |        |      |      |
| HETATM | 5530 | O1 | PRP | 342 | 30.375 | 57.942 | 23.972 | 1.00 | 0.00 |
| O      |      |    |     |     |        |        |        |      |      |
| HETATM | 5531 | H1 | PRP | 342 | 30.099 | 58.260 | 23.109 | 1.00 | 0.00 |
| H      |      |    |     |     |        |        |        |      |      |
| HETATM | 5532 | C1 | PRP | 342 | 30.565 | 56.535 | 23.823 | 1.00 | 0.00 |
| C      |      |    |     |     |        |        |        |      |      |
| HETATM | 5533 | H2 | PRP | 342 | 31.195 | 56.350 | 22.953 | 1.00 | 0.00 |
| H      |      |    |     |     |        |        |        |      |      |
| HETATM | 5534 | H3 | PRP | 342 | 31.197 | 56.355 | 24.693 | 1.00 | 0.00 |
| H      |      |    |     |     |        |        |        |      |      |
| HETATM | 5535 | C2 | PRP | 342 | 29.330 | 55.577 | 23.827 | 1.00 | 0.00 |
| C      |      |    |     |     |        |        |        |      |      |
| HETATM | 5536 | H4 | PRP | 342 | 29.689 | 54.590 | 23.536 | 1.00 | 0.00 |
| H      |      |    |     |     |        |        |        |      |      |
| HETATM | 5537 | O2 | PRP | 342 | 28.246 | 55.869 | 22.984 | 1.00 | 0.00 |
| O      |      |    |     |     |        |        |        |      |      |
| HETATM | 5538 | H5 | PRP | 342 | 27.385 | 55.754 | 23.391 | 1.00 | 0.00 |
| H      |      |    |     |     |        |        |        |      |      |
| HETATM | 5539 | C3 | PRP | 342 | 28.768 | 55.619 | 25.230 | 1.00 | 0.00 |
| C      |      |    |     |     |        |        |        |      |      |
| HETATM | 5540 | H6 | PRP | 342 | 27.977 | 54.881 | 25.368 | 1.00 | 0.00 |
| H      |      |    |     |     |        |        |        |      |      |
| HETATM | 5541 | H7 | PRP | 342 | 29.610 | 55.360 | 25.872 | 1.00 | 0.00 |
| H      |      |    |     |     |        |        |        |      |      |
| HETATM | 5542 | H8 | PRP | 342 | 28.450 | 56.599 | 25.585 | 1.00 | 0.00 |
| H      |      |    |     |     |        |        |        |      |      |
| HETATM | 5543 | O1 | PRP | 343 | 17.170 | 39.926 | 26.170 | 1.00 | 0.00 |
| O      |      |    |     |     |        |        |        |      |      |

|        |      |    |     |     |        |        |        |      |      |
|--------|------|----|-----|-----|--------|--------|--------|------|------|
| HETATM | 5544 | H1 | PRP | 343 | 17.458 | 39.653 | 25.296 | 1.00 | 0.00 |
| H      |      |    |     |     |        |        |        |      |      |
| HETATM | 5545 | C1 | PRP | 343 | 17.753 | 41.166 | 26.424 | 1.00 | 0.00 |
| C      |      |    |     |     |        |        |        |      |      |
| HETATM | 5546 | H2 | PRP | 343 | 17.047 | 41.805 | 26.954 | 1.00 | 0.00 |
| H      |      |    |     |     |        |        |        |      |      |
| HETATM | 5547 | H3 | PRP | 343 | 18.663 | 40.907 | 26.965 | 1.00 | 0.00 |
| H      |      |    |     |     |        |        |        |      |      |
| HETATM | 5548 | C2 | PRP | 343 | 18.018 | 41.835 | 25.059 | 1.00 | 0.00 |
| C      |      |    |     |     |        |        |        |      |      |
| HETATM | 5549 | H4 | PRP | 343 | 17.094 | 42.145 | 24.570 | 1.00 | 0.00 |
| H      |      |    |     |     |        |        |        |      |      |
| HETATM | 5550 | O2 | PRP | 343 | 18.936 | 40.996 | 24.353 | 1.00 | 0.00 |
| O      |      |    |     |     |        |        |        |      |      |
| HETATM | 5551 | H5 | PRP | 343 | 19.479 | 41.485 | 23.730 | 1.00 | 0.00 |
| H      |      |    |     |     |        |        |        |      |      |
| HETATM | 5552 | C3 | PRP | 343 | 18.828 | 43.092 | 25.509 | 1.00 | 0.00 |
| C      |      |    |     |     |        |        |        |      |      |
| HETATM | 5553 | H6 | PRP | 343 | 19.671 | 42.782 | 26.126 | 1.00 | 0.00 |
| H      |      |    |     |     |        |        |        |      |      |
| HETATM | 5554 | H7 | PRP | 343 | 19.120 | 43.753 | 24.693 | 1.00 | 0.00 |
| H      |      |    |     |     |        |        |        |      |      |
| HETATM | 5555 | H8 | PRP | 343 | 18.135 | 43.571 | 26.201 | 1.00 | 0.00 |
| H      |      |    |     |     |        |        |        |      |      |
| HETATM | 5556 | O1 | PRP | 344 | 3.212  | 8.608  | 40.584 | 1.00 | 0.00 |
| O      |      |    |     |     |        |        |        |      |      |
| HETATM | 5557 | H1 | PRP | 344 | 2.946  | 7.898  | 39.995 | 1.00 | 0.00 |
| H      |      |    |     |     |        |        |        |      |      |
| HETATM | 5558 | C1 | PRP | 344 | 4.427  | 8.197  | 41.188 | 1.00 | 0.00 |
| C      |      |    |     |     |        |        |        |      |      |
| HETATM | 5559 | H2 | PRP | 344 | 4.743  | 8.729  | 42.084 | 1.00 | 0.00 |
| H      |      |    |     |     |        |        |        |      |      |
| HETATM | 5560 | H3 | PRP | 344 | 4.243  | 7.166  | 41.492 | 1.00 | 0.00 |
| H      |      |    |     |     |        |        |        |      |      |
| HETATM | 5561 | C2 | PRP | 344 | 5.670  | 8.111  | 40.238 | 1.00 | 0.00 |
| C      |      |    |     |     |        |        |        |      |      |
| HETATM | 5562 | H4 | PRP | 344 | 5.695  | 9.080  | 39.740 | 1.00 | 0.00 |
| H      |      |    |     |     |        |        |        |      |      |
| HETATM | 5563 | O2 | PRP | 344 | 5.521  | 7.027  | 39.374 | 1.00 | 0.00 |
| O      |      |    |     |     |        |        |        |      |      |
| HETATM | 5564 | H5 | PRP | 344 | 4.605  | 6.991  | 39.089 | 1.00 | 0.00 |
| H      |      |    |     |     |        |        |        |      |      |
| HETATM | 5565 | C3 | PRP | 344 | 6.879  | 7.964  | 41.150 | 1.00 | 0.00 |
| C      |      |    |     |     |        |        |        |      |      |
| HETATM | 5566 | H6 | PRP | 344 | 7.705  | 7.766  | 40.467 | 1.00 | 0.00 |
| H      |      |    |     |     |        |        |        |      |      |
| HETATM | 5567 | H7 | PRP | 344 | 7.106  | 8.894  | 41.672 | 1.00 | 0.00 |
| H      |      |    |     |     |        |        |        |      |      |
| HETATM | 5568 | H8 | PRP | 344 | 6.717  | 7.146  | 41.852 | 1.00 | 0.00 |
| H      |      |    |     |     |        |        |        |      |      |
| HETATM | 5569 | O1 | PRP | 345 | 12.755 | 13.260 | 34.347 | 1.00 | 0.00 |
| O      |      |    |     |     |        |        |        |      |      |
| HETATM | 5570 | H1 | PRP | 345 | 12.487 | 14.131 | 34.043 | 1.00 | 0.00 |
| H      |      |    |     |     |        |        |        |      |      |
| HETATM | 5571 | C1 | PRP | 345 | 12.449 | 13.093 | 35.694 | 1.00 | 0.00 |
| C      |      |    |     |     |        |        |        |      |      |

|        |      |    |     |     |        |        |        |      |      |
|--------|------|----|-----|-----|--------|--------|--------|------|------|
| HETATM | 5572 | H2 | PRP | 345 | 11.394 | 13.312 | 35.858 | 1.00 | 0.00 |
| H      |      |    |     |     |        |        |        |      |      |
| HETATM | 5573 | H3 | PRP | 345 | 12.548 | 12.039 | 35.953 | 1.00 | 0.00 |
| H      |      |    |     |     |        |        |        |      |      |
| HETATM | 5574 | C2 | PRP | 345 | 13.284 | 13.955 | 36.574 | 1.00 | 0.00 |
| C      |      |    |     |     |        |        |        |      |      |
| HETATM | 5575 | H4 | PRP | 345 | 13.220 | 13.597 | 37.602 | 1.00 | 0.00 |
| H      |      |    |     |     |        |        |        |      |      |
| HETATM | 5576 | O2 | PRP | 345 | 12.773 | 15.270 | 36.427 | 1.00 | 0.00 |
| O      |      |    |     |     |        |        |        |      |      |
| HETATM | 5577 | H5 | PRP | 345 | 12.991 | 15.732 | 37.239 | 1.00 | 0.00 |
| H      |      |    |     |     |        |        |        |      |      |
| HETATM | 5578 | C3 | PRP | 345 | 14.773 | 13.724 | 36.264 | 1.00 | 0.00 |
| C      |      |    |     |     |        |        |        |      |      |
| HETATM | 5579 | H6 | PRP | 345 | 15.567 | 14.065 | 36.929 | 1.00 | 0.00 |
| H      |      |    |     |     |        |        |        |      |      |
| HETATM | 5580 | H7 | PRP | 345 | 14.866 | 12.638 | 36.307 | 1.00 | 0.00 |
| H      |      |    |     |     |        |        |        |      |      |
| HETATM | 5581 | H8 | PRP | 345 | 15.044 | 14.155 | 35.300 | 1.00 | 0.00 |
| H      |      |    |     |     |        |        |        |      |      |
| HETATM | 5582 | O1 | PRP | 346 | 5.476  | 23.709 | 41.085 | 1.00 | 0.00 |
| O      |      |    |     |     |        |        |        |      |      |
| HETATM | 5583 | H1 | PRP | 346 | 6.125  | 24.393 | 40.903 | 1.00 | 0.00 |
| H      |      |    |     |     |        |        |        |      |      |
| HETATM | 5584 | C1 | PRP | 346 | 4.266  | 24.134 | 40.571 | 1.00 | 0.00 |
| C      |      |    |     |     |        |        |        |      |      |
| HETATM | 5585 | H2 | PRP | 346 | 4.388  | 25.203 | 40.400 | 1.00 | 0.00 |
| H      |      |    |     |     |        |        |        |      |      |
| HETATM | 5586 | H3 | PRP | 346 | 4.087  | 23.704 | 39.586 | 1.00 | 0.00 |
| H      |      |    |     |     |        |        |        |      |      |
| HETATM | 5587 | C2 | PRP | 346 | 3.174  | 23.862 | 41.550 | 1.00 | 0.00 |
| C      |      |    |     |     |        |        |        |      |      |
| HETATM | 5588 | H4 | PRP | 346 | 3.543  | 24.411 | 42.416 | 1.00 | 0.00 |
| H      |      |    |     |     |        |        |        |      |      |
| HETATM | 5589 | O2 | PRP | 346 | 3.069  | 22.449 | 41.668 | 1.00 | 0.00 |
| O      |      |    |     |     |        |        |        |      |      |
| HETATM | 5590 | H5 | PRP | 346 | 3.952  | 22.088 | 41.780 | 1.00 | 0.00 |
| H      |      |    |     |     |        |        |        |      |      |
| HETATM | 5591 | C3 | PRP | 346 | 1.878  | 24.501 | 41.092 | 1.00 | 0.00 |
| C      |      |    |     |     |        |        |        |      |      |
| HETATM | 5592 | H6 | PRP | 346 | 2.088  | 25.519 | 40.765 | 1.00 | 0.00 |
| H      |      |    |     |     |        |        |        |      |      |
| HETATM | 5593 | H7 | PRP | 346 | 1.514  | 23.907 | 40.254 | 1.00 | 0.00 |
| H      |      |    |     |     |        |        |        |      |      |
| HETATM | 5594 | H8 | PRP | 346 | 1.124  | 24.479 | 41.879 | 1.00 | 0.00 |
| H      |      |    |     |     |        |        |        |      |      |
| HETATM | 5595 | O1 | PRP | 347 | 10.023 | 9.618  | 42.805 | 1.00 | 0.00 |
| O      |      |    |     |     |        |        |        |      |      |
| HETATM | 5596 | H1 | PRP | 347 | 10.375 | 10.425 | 42.421 | 1.00 | 0.00 |
| H      |      |    |     |     |        |        |        |      |      |
| HETATM | 5597 | C1 | PRP | 347 | 10.208 | 8.606  | 41.872 | 1.00 | 0.00 |
| C      |      |    |     |     |        |        |        |      |      |
| HETATM | 5598 | H2 | PRP | 347 | 9.538  | 7.778  | 42.103 | 1.00 | 0.00 |
| H      |      |    |     |     |        |        |        |      |      |
| HETATM | 5599 | H3 | PRP | 347 | 9.910  | 9.076  | 40.935 | 1.00 | 0.00 |
| H      |      |    |     |     |        |        |        |      |      |

|        |      |    |     |     |        |        |        |      |      |
|--------|------|----|-----|-----|--------|--------|--------|------|------|
| HETATM | 5600 | C2 | PRP | 347 | 11.689 | 8.050  | 41.842 | 1.00 | 0.00 |
| C      |      |    |     |     |        |        |        |      |      |
| HETATM | 5601 | H4 | PRP | 347 | 11.925 | 7.576  | 42.795 | 1.00 | 0.00 |
| H      |      |    |     |     |        |        |        |      |      |
| HETATM | 5602 | O2 | PRP | 347 | 12.696 | 9.030  | 41.470 | 1.00 | 0.00 |
| O      |      |    |     |     |        |        |        |      |      |
| HETATM | 5603 | H5 | PRP | 347 | 13.554 | 8.813  | 41.843 | 1.00 | 0.00 |
| H      |      |    |     |     |        |        |        |      |      |
| HETATM | 5604 | C3 | PRP | 347 | 11.656 | 7.063  | 40.640 | 1.00 | 0.00 |
| C      |      |    |     |     |        |        |        |      |      |
| HETATM | 5605 | H6 | PRP | 347 | 11.361 | 7.548  | 39.709 | 1.00 | 0.00 |
| H      |      |    |     |     |        |        |        |      |      |
| HETATM | 5606 | H7 | PRP | 347 | 12.673 | 6.688  | 40.527 | 1.00 | 0.00 |
| H      |      |    |     |     |        |        |        |      |      |
| HETATM | 5607 | H8 | PRP | 347 | 10.979 | 6.215  | 40.742 | 1.00 | 0.00 |
| H      |      |    |     |     |        |        |        |      |      |
| HETATM | 5608 | O1 | PRP | 348 | 10.991 | 1.490  | 45.551 | 1.00 | 0.00 |
| O      |      |    |     |     |        |        |        |      |      |
| HETATM | 5609 | H1 | PRP | 348 | 11.046 | 1.798  | 46.459 | 1.00 | 0.00 |
| H      |      |    |     |     |        |        |        |      |      |
| HETATM | 5610 | C1 | PRP | 348 | 10.591 | 0.084  | 45.313 | 1.00 | 0.00 |
| C      |      |    |     |     |        |        |        |      |      |
| HETATM | 5611 | H2 | PRP | 348 | 9.505  | 0.183  | 45.325 | 1.00 | 0.00 |
| H      |      |    |     |     |        |        |        |      |      |
| HETATM | 5612 | H3 | PRP | 348 | 11.011 | -0.215 | 44.354 | 1.00 | 0.00 |
| H      |      |    |     |     |        |        |        |      |      |
| HETATM | 5613 | C2 | PRP | 348 | 11.125 | -0.807 | 46.425 | 1.00 | 0.00 |
| C      |      |    |     |     |        |        |        |      |      |
| HETATM | 5614 | H4 | PRP | 348 | 10.565 | -0.636 | 47.344 | 1.00 | 0.00 |
| H      |      |    |     |     |        |        |        |      |      |
| HETATM | 5615 | O2 | PRP | 348 | 12.474 | -0.567 | 46.622 | 1.00 | 0.00 |
| O      |      |    |     |     |        |        |        |      |      |
| HETATM | 5616 | H5 | PRP | 348 | 12.662 | -1.268 | 47.251 | 1.00 | 0.00 |
| H      |      |    |     |     |        |        |        |      |      |
| HETATM | 5617 | C3 | PRP | 348 | 11.122 | -2.209 | 45.956 | 1.00 | 0.00 |
| C      |      |    |     |     |        |        |        |      |      |
| HETATM | 5618 | H6 | PRP | 348 | 11.827 | -2.312 | 45.130 | 1.00 | 0.00 |
| H      |      |    |     |     |        |        |        |      |      |
| HETATM | 5619 | H7 | PRP | 348 | 11.353 | -2.884 | 46.780 | 1.00 | 0.00 |
| H      |      |    |     |     |        |        |        |      |      |
| HETATM | 5620 | H8 | PRP | 348 | 10.085 | -2.396 | 45.680 | 1.00 | 0.00 |
| H      |      |    |     |     |        |        |        |      |      |
| HETATM | 5621 | O1 | PRP | 349 | 14.062 | 13.449 | 45.494 | 1.00 | 0.00 |
| O      |      |    |     |     |        |        |        |      |      |
| HETATM | 5622 | H1 | PRP | 349 | 14.544 | 13.870 | 44.778 | 1.00 | 0.00 |
| H      |      |    |     |     |        |        |        |      |      |
| HETATM | 5623 | C1 | PRP | 349 | 12.754 | 13.012 | 44.986 | 1.00 | 0.00 |
| C      |      |    |     |     |        |        |        |      |      |
| HETATM | 5624 | H2 | PRP | 349 | 12.822 | 12.721 | 43.938 | 1.00 | 0.00 |
| H      |      |    |     |     |        |        |        |      |      |
| HETATM | 5625 | H3 | PRP | 349 | 12.674 | 12.141 | 45.637 | 1.00 | 0.00 |
| H      |      |    |     |     |        |        |        |      |      |
| HETATM | 5626 | C2 | PRP | 349 | 11.679 | 14.036 | 45.077 | 1.00 | 0.00 |
| C      |      |    |     |     |        |        |        |      |      |
| HETATM | 5627 | H4 | PRP | 349 | 11.822 | 14.856 | 44.373 | 1.00 | 0.00 |
| H      |      |    |     |     |        |        |        |      |      |

|        |      |    |     |     |        |        |        |      |      |
|--------|------|----|-----|-----|--------|--------|--------|------|------|
| HETATM | 5628 | O2 | PRP | 349 | 11.596 | 14.501 | 46.403 | 1.00 | 0.00 |
| O      |      |    |     |     |        |        |        |      |      |
| HETATM | 5629 | H5 | PRP | 349 | 11.440 | 13.743 | 46.972 | 1.00 | 0.00 |
| H      |      |    |     |     |        |        |        |      |      |
| HETATM | 5630 | C3 | PRP | 349 | 10.391 | 13.283 | 44.767 | 1.00 | 0.00 |
| C      |      |    |     |     |        |        |        |      |      |
| HETATM | 5631 | H6 | PRP | 349 | 10.199 | 12.376 | 45.341 | 1.00 | 0.00 |
| H      |      |    |     |     |        |        |        |      |      |
| HETATM | 5632 | H7 | PRP | 349 | 9.610  | 14.035 | 44.877 | 1.00 | 0.00 |
| H      |      |    |     |     |        |        |        |      |      |
| HETATM | 5633 | H8 | PRP | 349 | 10.412 | 12.855 | 43.764 | 1.00 | 0.00 |
| H      |      |    |     |     |        |        |        |      |      |
| HETATM | 5634 | O1 | PRP | 350 | 9.942  | 4.914  | 42.721 | 1.00 | 0.00 |
| O      |      |    |     |     |        |        |        |      |      |
| HETATM | 5635 | H1 | PRP | 350 | 9.578  | 5.518  | 43.372 | 1.00 | 0.00 |
| H      |      |    |     |     |        |        |        |      |      |
| HETATM | 5636 | C1 | PRP | 350 | 11.000 | 4.094  | 43.104 | 1.00 | 0.00 |
| C      |      |    |     |     |        |        |        |      |      |
| HETATM | 5637 | H2 | PRP | 350 | 11.837 | 4.748  | 43.347 | 1.00 | 0.00 |
| H      |      |    |     |     |        |        |        |      |      |
| HETATM | 5638 | H3 | PRP | 350 | 10.625 | 3.524  | 43.954 | 1.00 | 0.00 |
| H      |      |    |     |     |        |        |        |      |      |
| HETATM | 5639 | C2 | PRP | 350 | 11.385 | 3.087  | 42.080 | 1.00 | 0.00 |
| C      |      |    |     |     |        |        |        |      |      |
| HETATM | 5640 | H4 | PRP | 350 | 12.243 | 2.521  | 42.445 | 1.00 | 0.00 |
| H      |      |    |     |     |        |        |        |      |      |
| HETATM | 5641 | O2 | PRP | 350 | 11.762 | 3.783  | 40.976 | 1.00 | 0.00 |
| O      |      |    |     |     |        |        |        |      |      |
| HETATM | 5642 | H5 | PRP | 350 | 11.169 | 4.527  | 40.849 | 1.00 | 0.00 |
| H      |      |    |     |     |        |        |        |      |      |
| HETATM | 5643 | C3 | PRP | 350 | 10.218 | 2.086  | 41.878 | 1.00 | 0.00 |
| C      |      |    |     |     |        |        |        |      |      |
| HETATM | 5644 | H6 | PRP | 350 | 9.807  | 1.674  | 42.800 | 1.00 | 0.00 |
| H      |      |    |     |     |        |        |        |      |      |
| HETATM | 5645 | H7 | PRP | 350 | 9.423  | 2.616  | 41.354 | 1.00 | 0.00 |
| H      |      |    |     |     |        |        |        |      |      |
| HETATM | 5646 | H8 | PRP | 350 | 10.563 | 1.292  | 41.216 | 1.00 | 0.00 |
| H      |      |    |     |     |        |        |        |      |      |
| HETATM | 5647 | O1 | PRP | 351 | 13.265 | 22.127 | 35.610 | 1.00 | 0.00 |
| O      |      |    |     |     |        |        |        |      |      |
| HETATM | 5648 | H1 | PRP | 351 | 14.060 | 21.589 | 35.632 | 1.00 | 0.00 |
| H      |      |    |     |     |        |        |        |      |      |
| HETATM | 5649 | C1 | PRP | 351 | 13.689 | 23.417 | 35.382 | 1.00 | 0.00 |
| C      |      |    |     |     |        |        |        |      |      |
| HETATM | 5650 | H2 | PRP | 351 | 12.957 | 23.871 | 34.713 | 1.00 | 0.00 |
| H      |      |    |     |     |        |        |        |      |      |
| HETATM | 5651 | H3 | PRP | 351 | 13.787 | 23.933 | 36.338 | 1.00 | 0.00 |
| H      |      |    |     |     |        |        |        |      |      |
| HETATM | 5652 | C2 | PRP | 351 | 15.035 | 23.327 | 34.662 | 1.00 | 0.00 |
| C      |      |    |     |     |        |        |        |      |      |
| HETATM | 5653 | H4 | PRP | 351 | 14.911 | 23.008 | 33.627 | 1.00 | 0.00 |
| H      |      |    |     |     |        |        |        |      |      |
| HETATM | 5654 | O2 | PRP | 351 | 15.903 | 22.520 | 35.427 | 1.00 | 0.00 |
| O      |      |    |     |     |        |        |        |      |      |
| HETATM | 5655 | H5 | PRP | 351 | 16.697 | 22.532 | 34.889 | 1.00 | 0.00 |
| H      |      |    |     |     |        |        |        |      |      |

|        |      |    |     |     |        |        |        |      |      |
|--------|------|----|-----|-----|--------|--------|--------|------|------|
| HETATM | 5656 | C3 | PRP | 351 | 15.725 | 24.683 | 34.568 | 1.00 | 0.00 |
| C      |      |    |     |     |        |        |        |      |      |
| HETATM | 5657 | H6 | PRP | 351 | 15.897 | 25.142 | 35.542 | 1.00 | 0.00 |
| H      |      |    |     |     |        |        |        |      |      |
| HETATM | 5658 | H7 | PRP | 351 | 16.700 | 24.533 | 34.105 | 1.00 | 0.00 |
| H      |      |    |     |     |        |        |        |      |      |
| HETATM | 5659 | H8 | PRP | 351 | 15.295 | 25.433 | 33.904 | 1.00 | 0.00 |
| H      |      |    |     |     |        |        |        |      |      |
| HETATM | 5660 | O1 | PRP | 352 | 22.445 | 9.866  | 49.531 | 1.00 | 0.00 |
| O      |      |    |     |     |        |        |        |      |      |
| HETATM | 5661 | H1 | PRP | 352 | 21.895 | 10.583 | 49.205 | 1.00 | 0.00 |
| H      |      |    |     |     |        |        |        |      |      |
| HETATM | 5662 | C1 | PRP | 352 | 22.570 | 9.028  | 48.442 | 1.00 | 0.00 |
| C      |      |    |     |     |        |        |        |      |      |
| HETATM | 5663 | H2 | PRP | 352 | 23.523 | 9.238  | 47.956 | 1.00 | 0.00 |
| H      |      |    |     |     |        |        |        |      |      |
| HETATM | 5664 | H3 | PRP | 352 | 22.483 | 8.000  | 48.793 | 1.00 | 0.00 |
| H      |      |    |     |     |        |        |        |      |      |
| HETATM | 5665 | C2 | PRP | 352 | 21.520 | 9.274  | 47.381 | 1.00 | 0.00 |
| C      |      |    |     |     |        |        |        |      |      |
| HETATM | 5666 | H4 | PRP | 352 | 21.634 | 8.523  | 46.600 | 1.00 | 0.00 |
| H      |      |    |     |     |        |        |        |      |      |
| HETATM | 5667 | O2 | PRP | 352 | 21.795 | 10.495 | 46.739 | 1.00 | 0.00 |
| O      |      |    |     |     |        |        |        |      |      |
| HETATM | 5668 | H5 | PRP | 352 | 21.332 | 11.208 | 47.186 | 1.00 | 0.00 |
| H      |      |    |     |     |        |        |        |      |      |
| HETATM | 5669 | C3 | PRP | 352 | 20.122 | 9.298  | 47.840 | 1.00 | 0.00 |
| C      |      |    |     |     |        |        |        |      |      |
| HETATM | 5670 | H6 | PRP | 352 | 19.967 | 10.013 | 48.648 | 1.00 | 0.00 |
| H      |      |    |     |     |        |        |        |      |      |
| HETATM | 5671 | H7 | PRP | 352 | 19.507 | 9.672  | 47.022 | 1.00 | 0.00 |
| H      |      |    |     |     |        |        |        |      |      |
| HETATM | 5672 | H8 | PRP | 352 | 19.898 | 8.287  | 48.182 | 1.00 | 0.00 |
| H      |      |    |     |     |        |        |        |      |      |
| HETATM | 5673 | O1 | PRP | 353 | 23.243 | 14.100 | 43.157 | 1.00 | 0.00 |
| O      |      |    |     |     |        |        |        |      |      |
| HETATM | 5674 | H1 | PRP | 353 | 23.677 | 14.558 | 43.880 | 1.00 | 0.00 |
| H      |      |    |     |     |        |        |        |      |      |
| HETATM | 5675 | C1 | PRP | 353 | 23.555 | 12.718 | 43.250 | 1.00 | 0.00 |
| C      |      |    |     |     |        |        |        |      |      |
| HETATM | 5676 | H2 | PRP | 353 | 23.017 | 12.331 | 44.115 | 1.00 | 0.00 |
| H      |      |    |     |     |        |        |        |      |      |
| HETATM | 5677 | H3 | PRP | 353 | 23.080 | 12.210 | 42.411 | 1.00 | 0.00 |
| H      |      |    |     |     |        |        |        |      |      |
| HETATM | 5678 | C2 | PRP | 353 | 25.055 | 12.373 | 43.520 | 1.00 | 0.00 |
| C      |      |    |     |     |        |        |        |      |      |
| HETATM | 5679 | H4 | PRP | 353 | 25.139 | 11.291 | 43.417 | 1.00 | 0.00 |
| H      |      |    |     |     |        |        |        |      |      |
| HETATM | 5680 | O2 | PRP | 353 | 25.344 | 12.802 | 44.860 | 1.00 | 0.00 |
| O      |      |    |     |     |        |        |        |      |      |
| HETATM | 5681 | H5 | PRP | 353 | 25.020 | 12.150 | 45.486 | 1.00 | 0.00 |
| H      |      |    |     |     |        |        |        |      |      |
| HETATM | 5682 | C3 | PRP | 353 | 25.891 | 13.090 | 42.507 | 1.00 | 0.00 |
| C      |      |    |     |     |        |        |        |      |      |
| HETATM | 5683 | H6 | PRP | 353 | 25.648 | 12.547 | 41.594 | 1.00 | 0.00 |
| H      |      |    |     |     |        |        |        |      |      |

|        |      |    |     |     |        |        |        |      |      |
|--------|------|----|-----|-----|--------|--------|--------|------|------|
| HETATM | 5684 | H7 | PRP | 353 | 25.860 | 14.169 | 42.654 | 1.00 | 0.00 |
| H      |      |    |     |     |        |        |        |      |      |
| HETATM | 5685 | H8 | PRP | 353 | 26.910 | 12.718 | 42.617 | 1.00 | 0.00 |
| H      |      |    |     |     |        |        |        |      |      |
| HETATM | 5686 | O1 | PRP | 354 | 14.397 | 4.785  | 42.101 | 1.00 | 0.00 |
| O      |      |    |     |     |        |        |        |      |      |
| HETATM | 5687 | H1 | PRP | 354 | 13.688 | 4.749  | 41.453 | 1.00 | 0.00 |
| H      |      |    |     |     |        |        |        |      |      |
| HETATM | 5688 | C1 | PRP | 354 | 15.641 | 4.856  | 41.452 | 1.00 | 0.00 |
| C      |      |    |     |     |        |        |        |      |      |
| HETATM | 5689 | H2 | PRP | 354 | 16.380 | 5.297  | 42.122 | 1.00 | 0.00 |
| H      |      |    |     |     |        |        |        |      |      |
| HETATM | 5690 | H3 | PRP | 354 | 15.901 | 3.804  | 41.336 | 1.00 | 0.00 |
| H      |      |    |     |     |        |        |        |      |      |
| HETATM | 5691 | C2 | PRP | 354 | 15.659 | 5.550  | 40.079 | 1.00 | 0.00 |
| C      |      |    |     |     |        |        |        |      |      |
| HETATM | 5692 | H4 | PRP | 354 | 16.632 | 5.284  | 39.666 | 1.00 | 0.00 |
| H      |      |    |     |     |        |        |        |      |      |
| HETATM | 5693 | O2 | PRP | 354 | 15.547 | 6.977  | 40.100 | 1.00 | 0.00 |
| O      |      |    |     |     |        |        |        |      |      |
| HETATM | 5694 | H5 | PRP | 354 | 15.586 | 7.358  | 39.220 | 1.00 | 0.00 |
| H      |      |    |     |     |        |        |        |      |      |
| HETATM | 5695 | C3 | PRP | 354 | 14.594 | 4.967  | 39.116 | 1.00 | 0.00 |
| C      |      |    |     |     |        |        |        |      |      |
| HETATM | 5696 | H6 | PRP | 354 | 14.429 | 5.606  | 38.249 | 1.00 | 0.00 |
| H      |      |    |     |     |        |        |        |      |      |
| HETATM | 5697 | H7 | PRP | 354 | 14.929 | 3.981  | 38.795 | 1.00 | 0.00 |
| H      |      |    |     |     |        |        |        |      |      |
| HETATM | 5698 | H8 | PRP | 354 | 13.699 | 4.787  | 39.712 | 1.00 | 0.00 |
| H      |      |    |     |     |        |        |        |      |      |
| HETATM | 5699 | O1 | PRP | 355 | 25.310 | -3.040 | 34.047 | 1.00 | 0.00 |
| O      |      |    |     |     |        |        |        |      |      |
| HETATM | 5700 | H1 | PRP | 355 | 24.488 | -2.864 | 34.511 | 1.00 | 0.00 |
| H      |      |    |     |     |        |        |        |      |      |
| HETATM | 5701 | C1 | PRP | 355 | 25.249 | -2.508 | 32.751 | 1.00 | 0.00 |
| C      |      |    |     |     |        |        |        |      |      |
| HETATM | 5702 | H2 | PRP | 355 | 24.321 | -1.947 | 32.643 | 1.00 | 0.00 |
| H      |      |    |     |     |        |        |        |      |      |
| HETATM | 5703 | H3 | PRP | 355 | 26.159 | -1.908 | 32.726 | 1.00 | 0.00 |
| H      |      |    |     |     |        |        |        |      |      |
| HETATM | 5704 | C2 | PRP | 355 | 25.329 | -3.559 | 31.634 | 1.00 | 0.00 |
| C      |      |    |     |     |        |        |        |      |      |
| HETATM | 5705 | H4 | PRP | 355 | 24.384 | -4.057 | 31.418 | 1.00 | 0.00 |
| H      |      |    |     |     |        |        |        |      |      |
| HETATM | 5706 | O2 | PRP | 355 | 26.197 | -4.549 | 32.137 | 1.00 | 0.00 |
| O      |      |    |     |     |        |        |        |      |      |
| HETATM | 5707 | H5 | PRP | 355 | 26.220 | -4.312 | 33.067 | 1.00 | 0.00 |
| H      |      |    |     |     |        |        |        |      |      |
| HETATM | 5708 | C3 | PRP | 355 | 25.859 | -3.120 | 30.299 | 1.00 | 0.00 |
| C      |      |    |     |     |        |        |        |      |      |
| HETATM | 5709 | H6 | PRP | 355 | 26.004 | -3.927 | 29.580 | 1.00 | 0.00 |
| H      |      |    |     |     |        |        |        |      |      |
| HETATM | 5710 | H7 | PRP | 355 | 25.113 | -2.523 | 29.775 | 1.00 | 0.00 |
| H      |      |    |     |     |        |        |        |      |      |
| HETATM | 5711 | H8 | PRP | 355 | 26.792 | -2.567 | 30.403 | 1.00 | 0.00 |
| H      |      |    |     |     |        |        |        |      |      |

|        |      |    |     |     |        |         |        |      |      |
|--------|------|----|-----|-----|--------|---------|--------|------|------|
| HETATM | 5712 | O1 | PRP | 356 | 23.098 | 4.986   | 41.895 | 1.00 | 0.00 |
| O      |      |    |     |     |        |         |        |      |      |
| HETATM | 5713 | H1 | PRP | 356 | 23.556 | 5.576   | 42.499 | 1.00 | 0.00 |
| H      |      |    |     |     |        |         |        |      |      |
| HETATM | 5714 | C1 | PRP | 356 | 23.959 | 3.873   | 41.547 | 1.00 | 0.00 |
| C      |      |    |     |     |        |         |        |      |      |
| HETATM | 5715 | H2 | PRP | 356 | 23.378 | 3.172   | 40.947 | 1.00 | 0.00 |
| H      |      |    |     |     |        |         |        |      |      |
| HETATM | 5716 | H3 | PRP | 356 | 24.786 | 4.197   | 40.915 | 1.00 | 0.00 |
| H      |      |    |     |     |        |         |        |      |      |
| HETATM | 5717 | C2 | PRP | 356 | 24.582 | 3.119   | 42.748 | 1.00 | 0.00 |
| C      |      |    |     |     |        |         |        |      |      |
| HETATM | 5718 | H4 | PRP | 356 | 23.758 | 2.712   | 43.335 | 1.00 | 0.00 |
| H      |      |    |     |     |        |         |        |      |      |
| HETATM | 5719 | O2 | PRP | 356 | 25.319 | 4.027   | 43.575 | 1.00 | 0.00 |
| O      |      |    |     |     |        |         |        |      |      |
| HETATM | 5720 | H5 | PRP | 356 | 25.870 | 4.531   | 42.972 | 1.00 | 0.00 |
| H      |      |    |     |     |        |         |        |      |      |
| HETATM | 5721 | C3 | PRP | 356 | 25.389 | 1.904   | 42.392 | 1.00 | 0.00 |
| C      |      |    |     |     |        |         |        |      |      |
| HETATM | 5722 | H6 | PRP | 356 | 24.801 | 1.171   | 41.840 | 1.00 | 0.00 |
| H      |      |    |     |     |        |         |        |      |      |
| HETATM | 5723 | H7 | PRP | 356 | 26.185 | 2.264   | 41.741 | 1.00 | 0.00 |
| H      |      |    |     |     |        |         |        |      |      |
| HETATM | 5724 | H8 | PRP | 356 | 25.883 | 1.436   | 43.244 | 1.00 | 0.00 |
| H      |      |    |     |     |        |         |        |      |      |
| HETATM | 5725 | O1 | PRP | 357 | 14.186 | 13.001  | 48.287 | 1.00 | 0.00 |
| O      |      |    |     |     |        |         |        |      |      |
| HETATM | 5726 | H1 | PRP | 357 | 14.135 | 13.341  | 47.391 | 1.00 | 0.00 |
| H      |      |    |     |     |        |         |        |      |      |
| HETATM | 5727 | C1 | PRP | 357 | 15.265 | 12.115  | 48.407 | 1.00 | 0.00 |
| C      |      |    |     |     |        |         |        |      |      |
| HETATM | 5728 | H2 | PRP | 357 | 15.238 | 11.371  | 47.610 | 1.00 | 0.00 |
| H      |      |    |     |     |        |         |        |      |      |
| HETATM | 5729 | H3 | PRP | 357 | 16.248 | 12.582  | 48.351 | 1.00 | 0.00 |
| H      |      |    |     |     |        |         |        |      |      |
| HETATM | 5730 | C2 | PRP | 357 | 15.243 | 11.286  | 49.661 | 1.00 | 0.00 |
| C      |      |    |     |     |        |         |        |      |      |
| HETATM | 5731 | H4 | PRP | 357 | 14.183 | 11.112  | 49.844 | 1.00 | 0.00 |
| H      |      |    |     |     |        |         |        |      |      |
| HETATM | 5732 | O2 | PRP | 357 | 15.757 | 12.029  | 50.816 | 1.00 | 0.00 |
| O      |      |    |     |     |        |         |        |      |      |
| HETATM | 5733 | H5 | PRP | 357 | 15.668 | 12.980  | 50.718 | 1.00 | 0.00 |
| H      |      |    |     |     |        |         |        |      |      |
| HETATM | 5734 | C3 | PRP | 357 | 15.996 | 9.979   | 49.408 | 1.00 | 0.00 |
| C      |      |    |     |     |        |         |        |      |      |
| HETATM | 5735 | H6 | PRP | 357 | 17.071 | 10.140  | 49.316 | 1.00 | 0.00 |
| H      |      |    |     |     |        |         |        |      |      |
| HETATM | 5736 | H7 | PRP | 357 | 15.931 | 9.442   | 50.354 | 1.00 | 0.00 |
| H      |      |    |     |     |        |         |        |      |      |
| HETATM | 5737 | H8 | PRP | 357 | 15.538 | 9.471   | 48.560 | 1.00 | 0.00 |
| H      |      |    |     |     |        |         |        |      |      |
| HETATM | 5738 | O1 | PRP | 358 | 23.625 | -11.393 | 34.643 | 1.00 | 0.00 |
| O      |      |    |     |     |        |         |        |      |      |
| HETATM | 5739 | H1 | PRP | 358 | 23.202 | -12.113 | 35.117 | 1.00 | 0.00 |
| H      |      |    |     |     |        |         |        |      |      |



|        |      |    |     |     |        |         |        |      |      |
|--------|------|----|-----|-----|--------|---------|--------|------|------|
| HETATM | 5740 | C1 | PRP | 358 | 23.066 | -11.340 | 33.356 | 1.00 | 0.00 |
| C      |      |    |     |     |        |         |        |      |      |
| HETATM | 5741 | H2 | PRP | 358 | 22.015 | -11.563 | 33.535 | 1.00 | 0.00 |
| H      |      |    |     |     |        |         |        |      |      |
| HETATM | 5742 | H3 | PRP | 358 | 23.171 | -10.397 | 32.819 | 1.00 | 0.00 |
| H      |      |    |     |     |        |         |        |      |      |
| HETATM | 5743 | C2 | PRP | 358 | 23.653 | -12.483 | 32.446 | 1.00 | 0.00 |
| C      |      |    |     |     |        |         |        |      |      |
| HETATM | 5744 | H4 | PRP | 358 | 23.782 | -13.427 | 32.976 | 1.00 | 0.00 |
| H      |      |    |     |     |        |         |        |      |      |
| HETATM | 5745 | O2 | PRP | 358 | 24.875 | -12.049 | 31.847 | 1.00 | 0.00 |
| O      |      |    |     |     |        |         |        |      |      |
| HETATM | 5746 | H5 | PRP | 358 | 25.648 | -12.267 | 32.372 | 1.00 | 0.00 |
| H      |      |    |     |     |        |         |        |      |      |
| HETATM | 5747 | C3 | PRP | 358 | 22.709 | -12.762 | 31.204 | 1.00 | 0.00 |
| C      |      |    |     |     |        |         |        |      |      |
| HETATM | 5748 | H6 | PRP | 358 | 23.281 | -13.428 | 30.558 | 1.00 | 0.00 |
| H      |      |    |     |     |        |         |        |      |      |
| HETATM | 5749 | H7 | PRP | 358 | 21.840 | -13.273 | 31.621 | 1.00 | 0.00 |
| H      |      |    |     |     |        |         |        |      |      |
| HETATM | 5750 | H8 | PRP | 358 | 22.425 | -11.868 | 30.649 | 1.00 | 0.00 |
| H      |      |    |     |     |        |         |        |      |      |
| HETATM | 5751 | O1 | PRP | 359 | 22.490 | 0.605   | 43.913 | 1.00 | 0.00 |
| O      |      |    |     |     |        |         |        |      |      |
| HETATM | 5752 | H1 | PRP | 359 | 22.695 | 0.050   | 43.157 | 1.00 | 0.00 |
| H      |      |    |     |     |        |         |        |      |      |
| HETATM | 5753 | C1 | PRP | 359 | 22.152 | -0.239  | 44.998 | 1.00 | 0.00 |
| C      |      |    |     |     |        |         |        |      |      |
| HETATM | 5754 | H2 | PRP | 359 | 22.381 | 0.226   | 45.957 | 1.00 | 0.00 |
| H      |      |    |     |     |        |         |        |      |      |
| HETATM | 5755 | H3 | PRP | 359 | 21.068 | -0.355  | 44.976 | 1.00 | 0.00 |
| H      |      |    |     |     |        |         |        |      |      |
| HETATM | 5756 | C2 | PRP | 359 | 22.594 | -1.640  | 44.806 | 1.00 | 0.00 |
| C      |      |    |     |     |        |         |        |      |      |
| HETATM | 5757 | H4 | PRP | 359 | 22.139 | -2.149  | 45.655 | 1.00 | 0.00 |
| H      |      |    |     |     |        |         |        |      |      |
| HETATM | 5758 | O2 | PRP | 359 | 24.047 | -1.651  | 44.955 | 1.00 | 0.00 |
| O      |      |    |     |     |        |         |        |      |      |
| HETATM | 5759 | H5 | PRP | 359 | 24.271 | -2.556  | 45.183 | 1.00 | 0.00 |
| H      |      |    |     |     |        |         |        |      |      |
| HETATM | 5760 | C3 | PRP | 359 | 22.189 | -2.231  | 43.464 | 1.00 | 0.00 |
| C      |      |    |     |     |        |         |        |      |      |
| HETATM | 5761 | H6 | PRP | 359 | 21.123 | -2.096  | 43.278 | 1.00 | 0.00 |
| H      |      |    |     |     |        |         |        |      |      |
| HETATM | 5762 | H7 | PRP | 359 | 22.773 | -1.829  | 42.637 | 1.00 | 0.00 |
| H      |      |    |     |     |        |         |        |      |      |
| HETATM | 5763 | H8 | PRP | 359 | 22.184 | -3.321  | 43.474 | 1.00 | 0.00 |
| H      |      |    |     |     |        |         |        |      |      |
| HETATM | 5764 | O1 | PRP | 360 | 15.117 | -5.199  | 40.862 | 1.00 | 0.00 |
| O      |      |    |     |     |        |         |        |      |      |
| HETATM | 5765 | H1 | PRP | 360 | 14.231 | -4.880  | 40.676 | 1.00 | 0.00 |
| H      |      |    |     |     |        |         |        |      |      |
| HETATM | 5766 | C1 | PRP | 360 | 15.975 | -4.047  | 40.672 | 1.00 | 0.00 |
| C      |      |    |     |     |        |         |        |      |      |
| HETATM | 5767 | H2 | PRP | 360 | 16.942 | -4.373  | 40.290 | 1.00 | 0.00 |
| H      |      |    |     |     |        |         |        |      |      |

|        |      |    |     |     |        |        |        |      |      |
|--------|------|----|-----|-----|--------|--------|--------|------|------|
| HETATM | 5768 | H3 | PRP | 360 | 15.623 | -3.373 | 39.891 | 1.00 | 0.00 |
| H      |      |    |     |     |        |        |        |      |      |
| HETATM | 5769 | C2 | PRP | 360 | 16.238 | -3.448 | 42.075 | 1.00 | 0.00 |
| C      |      |    |     |     |        |        |        |      |      |
| HETATM | 5770 | H4 | PRP | 360 | 16.636 | -4.293 | 42.636 | 1.00 | 0.00 |
| H      |      |    |     |     |        |        |        |      |      |
| HETATM | 5771 | O2 | PRP | 360 | 15.067 | -2.950 | 42.719 | 1.00 | 0.00 |
| O      |      |    |     |     |        |        |        |      |      |
| HETATM | 5772 | H5 | PRP | 360 | 15.376 | -2.474 | 43.494 | 1.00 | 0.00 |
| H      |      |    |     |     |        |        |        |      |      |
| HETATM | 5773 | C3 | PRP | 360 | 17.442 | -2.530 | 42.033 | 1.00 | 0.00 |
| C      |      |    |     |     |        |        |        |      |      |
| HETATM | 5774 | H6 | PRP | 360 | 18.348 | -2.980 | 41.627 | 1.00 | 0.00 |
| H      |      |    |     |     |        |        |        |      |      |
| HETATM | 5775 | H7 | PRP | 360 | 17.200 | -1.740 | 41.322 | 1.00 | 0.00 |
| H      |      |    |     |     |        |        |        |      |      |
| HETATM | 5776 | H8 | PRP | 360 | 17.670 | -2.158 | 43.032 | 1.00 | 0.00 |
| H      |      |    |     |     |        |        |        |      |      |
| HETATM | 5777 | O1 | PRP | 361 | 31.105 | -8.692 | 16.759 | 1.00 | 0.00 |
| O      |      |    |     |     |        |        |        |      |      |
| HETATM | 5778 | H1 | PRP | 361 | 31.152 | -9.004 | 15.852 | 1.00 | 0.00 |
| H      |      |    |     |     |        |        |        |      |      |
| HETATM | 5779 | C1 | PRP | 361 | 30.685 | -7.327 | 16.902 | 1.00 | 0.00 |
| C      |      |    |     |     |        |        |        |      |      |
| HETATM | 5780 | H2 | PRP | 361 | 31.506 | -6.633 | 16.724 | 1.00 | 0.00 |
| H      |      |    |     |     |        |        |        |      |      |
| HETATM | 5781 | H3 | PRP | 361 | 30.037 | -7.083 | 16.060 | 1.00 | 0.00 |
| H      |      |    |     |     |        |        |        |      |      |
| HETATM | 5782 | C2 | PRP | 361 | 30.028 | -7.051 | 18.224 | 1.00 | 0.00 |
| C      |      |    |     |     |        |        |        |      |      |
| HETATM | 5783 | H4 | PRP | 361 | 30.575 | -7.692 | 18.915 | 1.00 | 0.00 |
| H      |      |    |     |     |        |        |        |      |      |
| HETATM | 5784 | O2 | PRP | 361 | 28.685 | -7.454 | 18.182 | 1.00 | 0.00 |
| O      |      |    |     |     |        |        |        |      |      |
| HETATM | 5785 | H5 | PRP | 361 | 28.519 | -7.879 | 17.337 | 1.00 | 0.00 |
| H      |      |    |     |     |        |        |        |      |      |
| HETATM | 5786 | C3 | PRP | 361 | 30.028 | -5.614 | 18.690 | 1.00 | 0.00 |
| C      |      |    |     |     |        |        |        |      |      |
| HETATM | 5787 | H6 | PRP | 361 | 29.617 | -5.611 | 19.700 | 1.00 | 0.00 |
| H      |      |    |     |     |        |        |        |      |      |
| HETATM | 5788 | H7 | PRP | 361 | 31.014 | -5.178 | 18.854 | 1.00 | 0.00 |
| H      |      |    |     |     |        |        |        |      |      |
| HETATM | 5789 | H8 | PRP | 361 | 29.381 | -4.871 | 18.223 | 1.00 | 0.00 |
| H      |      |    |     |     |        |        |        |      |      |
| HETATM | 5790 | O1 | PRP | 362 | 29.887 | 5.603  | 35.753 | 1.00 | 0.00 |
| O      |      |    |     |     |        |        |        |      |      |
| HETATM | 5791 | H1 | PRP | 362 | 29.711 | 4.797  | 36.245 | 1.00 | 0.00 |
| H      |      |    |     |     |        |        |        |      |      |
| HETATM | 5792 | C1 | PRP | 362 | 28.848 | 6.528  | 36.172 | 1.00 | 0.00 |
| C      |      |    |     |     |        |        |        |      |      |
| HETATM | 5793 | H2 | PRP | 362 | 28.768 | 6.453  | 37.256 | 1.00 | 0.00 |
| H      |      |    |     |     |        |        |        |      |      |
| HETATM | 5794 | H3 | PRP | 362 | 28.968 | 7.566  | 35.860 | 1.00 | 0.00 |
| H      |      |    |     |     |        |        |        |      |      |
| HETATM | 5795 | C2 | PRP | 362 | 27.439 | 6.173  | 35.633 | 1.00 | 0.00 |
| C      |      |    |     |     |        |        |        |      |      |

|        |      |    |     |     |        |         |        |      |      |
|--------|------|----|-----|-----|--------|---------|--------|------|------|
| HETATM | 5796 | H4 | PRP | 362 | 26.697 | 6.913   | 35.930 | 1.00 | 0.00 |
| H      |      |    |     |     |        |         |        |      |      |
| HETATM | 5797 | O2 | PRP | 362 | 26.959 | 4.912   | 36.175 | 1.00 | 0.00 |
| O      |      |    |     |     |        |         |        |      |      |
| HETATM | 5798 | H5 | PRP | 362 | 25.999 | 4.930   | 36.154 | 1.00 | 0.00 |
| H      |      |    |     |     |        |         |        |      |      |
| HETATM | 5799 | C3 | PRP | 362 | 27.429 | 6.114   | 34.109 | 1.00 | 0.00 |
| C      |      |    |     |     |        |         |        |      |      |
| HETATM | 5800 | H6 | PRP | 362 | 26.498 | 5.684   | 33.741 | 1.00 | 0.00 |
| H      |      |    |     |     |        |         |        |      |      |
| HETATM | 5801 | H7 | PRP | 362 | 27.561 | 7.120   | 33.711 | 1.00 | 0.00 |
| H      |      |    |     |     |        |         |        |      |      |
| HETATM | 5802 | H8 | PRP | 362 | 28.259 | 5.551   | 33.682 | 1.00 | 0.00 |
| H      |      |    |     |     |        |         |        |      |      |
| HETATM | 5803 | O1 | PRP | 363 | 3.037  | -14.583 | 42.578 | 1.00 | 0.00 |
| O      |      |    |     |     |        |         |        |      |      |
| HETATM | 5804 | H1 | PRP | 363 | 2.430  | -15.269 | 42.864 | 1.00 | 0.00 |
| H      |      |    |     |     |        |         |        |      |      |
| HETATM | 5805 | C1 | PRP | 363 | 3.739  | -14.143 | 43.727 | 1.00 | 0.00 |
| C      |      |    |     |     |        |         |        |      |      |
| HETATM | 5806 | H2 | PRP | 363 | 2.933  | -13.986 | 44.444 | 1.00 | 0.00 |
| H      |      |    |     |     |        |         |        |      |      |
| HETATM | 5807 | H3 | PRP | 363 | 4.631  | -14.705 | 44.005 | 1.00 | 0.00 |
| H      |      |    |     |     |        |         |        |      |      |
| HETATM | 5808 | C2 | PRP | 363 | 4.195  | -12.635 | 43.401 | 1.00 | 0.00 |
| C      |      |    |     |     |        |         |        |      |      |
| HETATM | 5809 | H4 | PRP | 363 | 3.480  | -12.271 | 42.664 | 1.00 | 0.00 |
| H      |      |    |     |     |        |         |        |      |      |
| HETATM | 5810 | O2 | PRP | 363 | 5.522  | -12.631 | 42.941 | 1.00 | 0.00 |
| O      |      |    |     |     |        |         |        |      |      |
| HETATM | 5811 | H5 | PRP | 363 | 5.642  | -13.138 | 42.135 | 1.00 | 0.00 |
| H      |      |    |     |     |        |         |        |      |      |
| HETATM | 5812 | C3 | PRP | 363 | 4.253  | -11.721 | 44.618 | 1.00 | 0.00 |
| C      |      |    |     |     |        |         |        |      |      |
| HETATM | 5813 | H6 | PRP | 363 | 3.400  | -12.004 | 45.235 | 1.00 | 0.00 |
| H      |      |    |     |     |        |         |        |      |      |
| HETATM | 5814 | H7 | PRP | 363 | 5.111  | -11.977 | 45.239 | 1.00 | 0.00 |
| H      |      |    |     |     |        |         |        |      |      |
| HETATM | 5815 | H8 | PRP | 363 | 4.196  | -10.658 | 44.383 | 1.00 | 0.00 |
| H      |      |    |     |     |        |         |        |      |      |
| HETATM | 5816 | O1 | PRP | 364 | 8.641  | 17.143  | 42.834 | 1.00 | 0.00 |
| O      |      |    |     |     |        |         |        |      |      |
| HETATM | 5817 | H1 | PRP | 364 | 8.287  | 17.562  | 43.622 | 1.00 | 0.00 |
| H      |      |    |     |     |        |         |        |      |      |
| HETATM | 5818 | C1 | PRP | 364 | 10.033 | 16.787  | 43.107 | 1.00 | 0.00 |
| C      |      |    |     |     |        |         |        |      |      |
| HETATM | 5819 | H2 | PRP | 364 | 10.418 | 17.391  | 43.929 | 1.00 | 0.00 |
| H      |      |    |     |     |        |         |        |      |      |
| HETATM | 5820 | H3 | PRP | 364 | 10.173 | 15.717  | 43.265 | 1.00 | 0.00 |
| H      |      |    |     |     |        |         |        |      |      |
| HETATM | 5821 | C2 | PRP | 364 | 10.810 | 17.218  | 41.864 | 1.00 | 0.00 |
| C      |      |    |     |     |        |         |        |      |      |
| HETATM | 5822 | H4 | PRP | 364 | 10.310 | 18.054  | 41.375 | 1.00 | 0.00 |
| H      |      |    |     |     |        |         |        |      |      |
| HETATM | 5823 | O2 | PRP | 364 | 11.008 | 16.227  | 40.899 | 1.00 | 0.00 |
| O      |      |    |     |     |        |         |        |      |      |

|        |      |    |     |     |        |        |        |      |      |
|--------|------|----|-----|-----|--------|--------|--------|------|------|
| HETATM | 5824 | H5 | PRP | 364 | 10.202 | 16.108 | 40.391 | 1.00 | 0.00 |
| H      |      |    |     |     |        |        |        |      |      |
| HETATM | 5825 | C3 | PRP | 364 | 12.168 | 17.732 | 42.380 | 1.00 | 0.00 |
| C      |      |    |     |     |        |        |        |      |      |
| HETATM | 5826 | H6 | PRP | 364 | 12.720 | 16.943 | 42.892 | 1.00 | 0.00 |
| H      |      |    |     |     |        |        |        |      |      |
| HETATM | 5827 | H7 | PRP | 364 | 12.754 | 18.152 | 41.563 | 1.00 | 0.00 |
| H      |      |    |     |     |        |        |        |      |      |
| HETATM | 5828 | H8 | PRP | 364 | 11.992 | 18.638 | 42.960 | 1.00 | 0.00 |
| H      |      |    |     |     |        |        |        |      |      |
| HETATM | 5829 | O1 | PRP | 365 | -0.718 | 13.810 | 39.670 | 1.00 | 0.00 |
| O      |      |    |     |     |        |        |        |      |      |
| HETATM | 5830 | H1 | PRP | 365 | -1.014 | 13.870 | 40.582 | 1.00 | 0.00 |
| H      |      |    |     |     |        |        |        |      |      |
| HETATM | 5831 | C1 | PRP | 365 | -0.263 | 15.104 | 39.433 | 1.00 | 0.00 |
| C      |      |    |     |     |        |        |        |      |      |
| HETATM | 5832 | H2 | PRP | 365 | 0.090  | 15.235 | 38.411 | 1.00 | 0.00 |
| H      |      |    |     |     |        |        |        |      |      |
| HETATM | 5833 | H3 | PRP | 365 | -0.977 | 15.900 | 39.644 | 1.00 | 0.00 |
| H      |      |    |     |     |        |        |        |      |      |
| HETATM | 5834 | C2 | PRP | 365 | 0.972  | 15.390 | 40.316 | 1.00 | 0.00 |
| C      |      |    |     |     |        |        |        |      |      |
| HETATM | 5835 | H4 | PRP | 365 | 1.703  | 14.637 | 40.022 | 1.00 | 0.00 |
| H      |      |    |     |     |        |        |        |      |      |
| HETATM | 5836 | O2 | PRP | 365 | 0.492  | 15.362 | 41.698 | 1.00 | 0.00 |
| O      |      |    |     |     |        |        |        |      |      |
| HETATM | 5837 | H5 | PRP | 365 | 1.271  | 15.377 | 42.259 | 1.00 | 0.00 |
| H      |      |    |     |     |        |        |        |      |      |
| HETATM | 5838 | C3 | PRP | 365 | 1.518  | 16.779 | 40.118 | 1.00 | 0.00 |
| C      |      |    |     |     |        |        |        |      |      |
| HETATM | 5839 | H6 | PRP | 365 | 0.736  | 17.537 | 40.164 | 1.00 | 0.00 |
| H      |      |    |     |     |        |        |        |      |      |
| HETATM | 5840 | H7 | PRP | 365 | 2.300  | 16.880 | 40.871 | 1.00 | 0.00 |
| H      |      |    |     |     |        |        |        |      |      |
| HETATM | 5841 | H8 | PRP | 365 | 1.990  | 16.675 | 39.141 | 1.00 | 0.00 |
| H      |      |    |     |     |        |        |        |      |      |
| HETATM | 5842 | O1 | PRP | 366 | -0.392 | 32.980 | 46.876 | 1.00 | 0.00 |
| O      |      |    |     |     |        |        |        |      |      |
| HETATM | 5843 | H1 | PRP | 366 | -0.623 | 33.476 | 47.664 | 1.00 | 0.00 |
| H      |      |    |     |     |        |        |        |      |      |
| HETATM | 5844 | C1 | PRP | 366 | 0.953  | 33.409 | 46.481 | 1.00 | 0.00 |
| C      |      |    |     |     |        |        |        |      |      |
| HETATM | 5845 | H2 | PRP | 366 | 0.946  | 34.476 | 46.261 | 1.00 | 0.00 |
| H      |      |    |     |     |        |        |        |      |      |
| HETATM | 5846 | H3 | PRP | 366 | 1.449  | 33.300 | 47.446 | 1.00 | 0.00 |
| H      |      |    |     |     |        |        |        |      |      |
| HETATM | 5847 | C2 | PRP | 366 | 1.680  | 32.647 | 45.361 | 1.00 | 0.00 |
| C      |      |    |     |     |        |        |        |      |      |
| HETATM | 5848 | H4 | PRP | 366 | 1.075  | 32.867 | 44.481 | 1.00 | 0.00 |
| H      |      |    |     |     |        |        |        |      |      |
| HETATM | 5849 | O2 | PRP | 366 | 1.769  | 31.207 | 45.575 | 1.00 | 0.00 |
| O      |      |    |     |     |        |        |        |      |      |
| HETATM | 5850 | H5 | PRP | 366 | 0.919  | 30.797 | 45.397 | 1.00 | 0.00 |
| H      |      |    |     |     |        |        |        |      |      |
| HETATM | 5851 | C3 | PRP | 366 | 3.020  | 33.094 | 45.189 | 1.00 | 0.00 |
| C      |      |    |     |     |        |        |        |      |      |

|        |      |    |     |     |        |        |        |      |      |
|--------|------|----|-----|-----|--------|--------|--------|------|------|
| HETATM | 5852 | H6 | PRP | 366 | 3.530  | 32.803 | 46.107 | 1.00 | 0.00 |
| H      |      |    |     |     |        |        |        |      |      |
| HETATM | 5853 | H7 | PRP | 366 | 3.334  | 32.493 | 44.335 | 1.00 | 0.00 |
| H      |      |    |     |     |        |        |        |      |      |
| HETATM | 5854 | H8 | PRP | 366 | 3.056  | 34.163 | 44.978 | 1.00 | 0.00 |
| H      |      |    |     |     |        |        |        |      |      |
| HETATM | 5855 | O1 | PRP | 367 | 16.298 | 1.081  | 40.435 | 1.00 | 0.00 |
| O      |      |    |     |     |        |        |        |      |      |
| HETATM | 5856 | H1 | PRP | 367 | 15.532 | 1.203  | 41.001 | 1.00 | 0.00 |
| H      |      |    |     |     |        |        |        |      |      |
| HETATM | 5857 | C1 | PRP | 367 | 15.897 | 0.835  | 39.125 | 1.00 | 0.00 |
| C      |      |    |     |     |        |        |        |      |      |
| HETATM | 5858 | H2 | PRP | 367 | 16.197 | 1.694  | 38.526 | 1.00 | 0.00 |
| H      |      |    |     |     |        |        |        |      |      |
| HETATM | 5859 | H3 | PRP | 367 | 16.355 | -0.047 | 38.676 | 1.00 | 0.00 |
| H      |      |    |     |     |        |        |        |      |      |
| HETATM | 5860 | C2 | PRP | 367 | 14.366 | 0.600  | 38.857 | 1.00 | 0.00 |
| C      |      |    |     |     |        |        |        |      |      |
| HETATM | 5861 | H4 | PRP | 367 | 14.206 | 0.360  | 37.806 | 1.00 | 0.00 |
| H      |      |    |     |     |        |        |        |      |      |
| HETATM | 5862 | O2 | PRP | 367 | 13.580 | 1.722  | 39.207 | 1.00 | 0.00 |
| O      |      |    |     |     |        |        |        |      |      |
| HETATM | 5863 | H5 | PRP | 367 | 13.610 | 1.704  | 40.167 | 1.00 | 0.00 |
| H      |      |    |     |     |        |        |        |      |      |
| HETATM | 5864 | C3 | PRP | 367 | 13.923 | -0.572 | 39.712 | 1.00 | 0.00 |
| C      |      |    |     |     |        |        |        |      |      |
| HETATM | 5865 | H6 | PRP | 367 | 14.602 | -1.407 | 39.535 | 1.00 | 0.00 |
| H      |      |    |     |     |        |        |        |      |      |
| HETATM | 5866 | H7 | PRP | 367 | 14.091 | -0.422 | 40.779 | 1.00 | 0.00 |
| H      |      |    |     |     |        |        |        |      |      |
| HETATM | 5867 | H8 | PRP | 367 | 12.917 | -0.870 | 39.417 | 1.00 | 0.00 |
| H      |      |    |     |     |        |        |        |      |      |
| HETATM | 5868 | O1 | PRP | 368 | 11.883 | 20.009 | 46.559 | 1.00 | 0.00 |
| O      |      |    |     |     |        |        |        |      |      |
| HETATM | 5869 | H1 | PRP | 368 | 12.131 | 19.158 | 46.929 | 1.00 | 0.00 |
| H      |      |    |     |     |        |        |        |      |      |
| HETATM | 5870 | C1 | PRP | 368 | 12.039 | 21.009 | 47.615 | 1.00 | 0.00 |
| C      |      |    |     |     |        |        |        |      |      |
| HETATM | 5871 | H2 | PRP | 368 | 12.577 | 21.809 | 47.107 | 1.00 | 0.00 |
| H      |      |    |     |     |        |        |        |      |      |
| HETATM | 5872 | H3 | PRP | 368 | 11.051 | 21.283 | 47.985 | 1.00 | 0.00 |
| H      |      |    |     |     |        |        |        |      |      |
| HETATM | 5873 | C2 | PRP | 368 | 13.034 | 20.648 | 48.756 | 1.00 | 0.00 |
| C      |      |    |     |     |        |        |        |      |      |
| HETATM | 5874 | H4 | PRP | 368 | 13.931 | 20.371 | 48.202 | 1.00 | 0.00 |
| H      |      |    |     |     |        |        |        |      |      |
| HETATM | 5875 | O2 | PRP | 368 | 12.563 | 19.499 | 49.426 | 1.00 | 0.00 |
| O      |      |    |     |     |        |        |        |      |      |
| HETATM | 5876 | H5 | PRP | 368 | 11.943 | 19.689 | 50.134 | 1.00 | 0.00 |
| H      |      |    |     |     |        |        |        |      |      |
| HETATM | 5877 | C3 | PRP | 368 | 13.217 | 21.798 | 49.686 | 1.00 | 0.00 |
| C      |      |    |     |     |        |        |        |      |      |
| HETATM | 5878 | H6 | PRP | 368 | 13.490 | 22.662 | 49.080 | 1.00 | 0.00 |
| H      |      |    |     |     |        |        |        |      |      |
| HETATM | 5879 | H7 | PRP | 368 | 12.303 | 22.071 | 50.215 | 1.00 | 0.00 |
| H      |      |    |     |     |        |        |        |      |      |

|        |      |    |     |     |        |        |        |      |      |
|--------|------|----|-----|-----|--------|--------|--------|------|------|
| HETATM | 5880 | H8 | PRP | 368 | 14.009 | 21.603 | 50.409 | 1.00 | 0.00 |
| H      |      |    |     |     |        |        |        |      |      |
| HETATM | 5881 | O1 | PRP | 369 | 19.656 | 12.363 | 40.204 | 1.00 | 0.00 |
| O      |      |    |     |     |        |        |        |      |      |
| HETATM | 5882 | H1 | PRP | 369 | 19.878 | 13.280 | 40.379 | 1.00 | 0.00 |
| H      |      |    |     |     |        |        |        |      |      |
| HETATM | 5883 | C1 | PRP | 369 | 18.183 | 12.276 | 40.216 | 1.00 | 0.00 |
| C      |      |    |     |     |        |        |        |      |      |
| HETATM | 5884 | H2 | PRP | 369 | 17.823 | 12.555 | 41.207 | 1.00 | 0.00 |
| H      |      |    |     |     |        |        |        |      |      |
| HETATM | 5885 | H3 | PRP | 369 | 17.753 | 12.895 | 39.429 | 1.00 | 0.00 |
| H      |      |    |     |     |        |        |        |      |      |
| HETATM | 5886 | C2 | PRP | 369 | 17.676 | 10.809 | 40.044 | 1.00 | 0.00 |
| C      |      |    |     |     |        |        |        |      |      |
| HETATM | 5887 | H4 | PRP | 369 | 17.995 | 10.163 | 40.862 | 1.00 | 0.00 |
| H      |      |    |     |     |        |        |        |      |      |
| HETATM | 5888 | O2 | PRP | 369 | 18.104 | 10.351 | 38.837 | 1.00 | 0.00 |
| O      |      |    |     |     |        |        |        |      |      |
| HETATM | 5889 | H5 | PRP | 369 | 19.061 | 10.358 | 38.909 | 1.00 | 0.00 |
| H      |      |    |     |     |        |        |        |      |      |
| HETATM | 5890 | C3 | PRP | 369 | 16.149 | 10.740 | 39.905 | 1.00 | 0.00 |
| C      |      |    |     |     |        |        |        |      |      |
| HETATM | 5891 | H6 | PRP | 369 | 15.550 | 11.112 | 40.736 | 1.00 | 0.00 |
| H      |      |    |     |     |        |        |        |      |      |
| HETATM | 5892 | H7 | PRP | 369 | 15.772 | 11.230 | 39.007 | 1.00 | 0.00 |
| H      |      |    |     |     |        |        |        |      |      |
| HETATM | 5893 | H8 | PRP | 369 | 15.838 | 9.703  | 39.775 | 1.00 | 0.00 |
| H      |      |    |     |     |        |        |        |      |      |
| HETATM | 5894 | O1 | PRP | 370 | 3.683  | 27.500 | 42.835 | 1.00 | 0.00 |
| O      |      |    |     |     |        |        |        |      |      |
| HETATM | 5895 | H1 | PRP | 370 | 4.075  | 27.864 | 42.038 | 1.00 | 0.00 |
| H      |      |    |     |     |        |        |        |      |      |
| HETATM | 5896 | C1 | PRP | 370 | 3.254  | 28.566 | 43.686 | 1.00 | 0.00 |
| C      |      |    |     |     |        |        |        |      |      |
| HETATM | 5897 | H2 | PRP | 370 | 4.169  | 29.095 | 43.951 | 1.00 | 0.00 |
| H      |      |    |     |     |        |        |        |      |      |
| HETATM | 5898 | H3 | PRP | 370 | 2.563  | 29.264 | 43.213 | 1.00 | 0.00 |
| H      |      |    |     |     |        |        |        |      |      |
| HETATM | 5899 | C2 | PRP | 370 | 2.684  | 27.999 | 44.982 | 1.00 | 0.00 |
| C      |      |    |     |     |        |        |        |      |      |
| HETATM | 5900 | H4 | PRP | 370 | 2.536  | 28.847 | 45.649 | 1.00 | 0.00 |
| H      |      |    |     |     |        |        |        |      |      |
| HETATM | 5901 | O2 | PRP | 370 | 3.683  | 27.149 | 45.641 | 1.00 | 0.00 |
| O      |      |    |     |     |        |        |        |      |      |
| HETATM | 5902 | H5 | PRP | 370 | 4.220  | 26.720 | 44.970 | 1.00 | 0.00 |
| H      |      |    |     |     |        |        |        |      |      |
| HETATM | 5903 | C3 | PRP | 370 | 1.499  | 27.049 | 44.696 | 1.00 | 0.00 |
| C      |      |    |     |     |        |        |        |      |      |
| HETATM | 5904 | H6 | PRP | 370 | 0.918  | 26.951 | 45.613 | 1.00 | 0.00 |
| H      |      |    |     |     |        |        |        |      |      |
| HETATM | 5905 | H7 | PRP | 370 | 0.943  | 27.499 | 43.874 | 1.00 | 0.00 |
| H      |      |    |     |     |        |        |        |      |      |
| HETATM | 5906 | H8 | PRP | 370 | 1.866  | 26.079 | 44.363 | 1.00 | 0.00 |
| H      |      |    |     |     |        |        |        |      |      |
| HETATM | 5907 | O1 | PRP | 371 | 7.932  | 9.141  | 44.777 | 1.00 | 0.00 |
| O      |      |    |     |     |        |        |        |      |      |

|        |      |    |     |     |        |         |        |      |      |
|--------|------|----|-----|-----|--------|---------|--------|------|------|
| HETATM | 5908 | H1 | PRP | 371 | 8.602  | 9.169   | 44.090 | 1.00 | 0.00 |
| H      |      |    |     |     |        |         |        |      |      |
| HETATM | 5909 | C1 | PRP | 371 | 7.212  | 10.343  | 44.821 | 1.00 | 0.00 |
| C      |      |    |     |     |        |         |        |      |      |
| HETATM | 5910 | H2 | PRP | 371 | 7.889  | 11.114  | 44.454 | 1.00 | 0.00 |
| H      |      |    |     |     |        |         |        |      |      |
| HETATM | 5911 | H3 | PRP | 371 | 6.300  | 10.250  | 44.232 | 1.00 | 0.00 |
| H      |      |    |     |     |        |         |        |      |      |
| HETATM | 5912 | C2 | PRP | 371 | 6.839  | 10.787  | 46.218 | 1.00 | 0.00 |
| C      |      |    |     |     |        |         |        |      |      |
| HETATM | 5913 | H4 | PRP | 371 | 7.730  | 10.876  | 46.840 | 1.00 | 0.00 |
| H      |      |    |     |     |        |         |        |      |      |
| HETATM | 5914 | O2 | PRP | 371 | 6.027  | 9.802   | 46.705 | 1.00 | 0.00 |
| O      |      |    |     |     |        |         |        |      |      |
| HETATM | 5915 | H5 | PRP | 371 | 5.599  | 9.425   | 45.933 | 1.00 | 0.00 |
| H      |      |    |     |     |        |         |        |      |      |
| HETATM | 5916 | C3 | PRP | 371 | 6.161  | 12.182  | 46.048 | 1.00 | 0.00 |
| C      |      |    |     |     |        |         |        |      |      |
| HETATM | 5917 | H6 | PRP | 371 | 6.185  | 12.761  | 46.971 | 1.00 | 0.00 |
| H      |      |    |     |     |        |         |        |      |      |
| HETATM | 5918 | H7 | PRP | 371 | 6.698  | 12.787  | 45.317 | 1.00 | 0.00 |
| H      |      |    |     |     |        |         |        |      |      |
| HETATM | 5919 | H8 | PRP | 371 | 5.156  | 12.051  | 45.647 | 1.00 | 0.00 |
| H      |      |    |     |     |        |         |        |      |      |
| HETATM | 5920 | O1 | PRP | 372 | 18.329 | -11.403 | 40.988 | 1.00 | 0.00 |
| O      |      |    |     |     |        |         |        |      |      |
| HETATM | 5921 | H1 | PRP | 372 | 18.259 | -12.132 | 41.609 | 1.00 | 0.00 |
| H      |      |    |     |     |        |         |        |      |      |
| HETATM | 5922 | C1 | PRP | 372 | 19.706 | -11.531 | 40.725 | 1.00 | 0.00 |
| C      |      |    |     |     |        |         |        |      |      |
| HETATM | 5923 | H2 | PRP | 372 | 19.913 | -12.177 | 39.872 | 1.00 | 0.00 |
| H      |      |    |     |     |        |         |        |      |      |
| HETATM | 5924 | H3 | PRP | 372 | 20.099 | -10.518 | 40.640 | 1.00 | 0.00 |
| H      |      |    |     |     |        |         |        |      |      |
| HETATM | 5925 | C2 | PRP | 372 | 20.483 | -12.288 | 41.880 | 1.00 | 0.00 |
| C      |      |    |     |     |        |         |        |      |      |
| HETATM | 5926 | H4 | PRP | 372 | 21.528 | -12.346 | 41.576 | 1.00 | 0.00 |
| H      |      |    |     |     |        |         |        |      |      |
| HETATM | 5927 | O2 | PRP | 372 | 19.865 | -13.582 | 42.165 | 1.00 | 0.00 |
| O      |      |    |     |     |        |         |        |      |      |
| HETATM | 5928 | H5 | PRP | 372 | 20.204 | -14.334 | 41.674 | 1.00 | 0.00 |
| H      |      |    |     |     |        |         |        |      |      |
| HETATM | 5929 | C3 | PRP | 372 | 20.365 | -11.443 | 43.152 | 1.00 | 0.00 |
| C      |      |    |     |     |        |         |        |      |      |
| HETATM | 5930 | H6 | PRP | 372 | 20.836 | -10.477 | 42.973 | 1.00 | 0.00 |
| H      |      |    |     |     |        |         |        |      |      |
| HETATM | 5931 | H7 | PRP | 372 | 19.325 | -11.251 | 43.416 | 1.00 | 0.00 |
| H      |      |    |     |     |        |         |        |      |      |
| HETATM | 5932 | H8 | PRP | 372 | 20.920 | -11.968 | 43.929 | 1.00 | 0.00 |
| H      |      |    |     |     |        |         |        |      |      |
| HETATM | 5933 | O1 | PRP | 373 | 4.221  | 4.961   | 42.354 | 1.00 | 0.00 |
| O      |      |    |     |     |        |         |        |      |      |
| HETATM | 5934 | H1 | PRP | 373 | 4.653  | 5.219   | 43.172 | 1.00 | 0.00 |
| H      |      |    |     |     |        |         |        |      |      |
| HETATM | 5935 | C1 | PRP | 373 | 4.100  | 3.562   | 42.262 | 1.00 | 0.00 |
| C      |      |    |     |     |        |         |        |      |      |

|        |      |    |     |     |        |        |        |      |      |
|--------|------|----|-----|-----|--------|--------|--------|------|------|
| HETATM | 5936 | H2 | PRP | 373 | 4.276  | 3.287  | 43.302 | 1.00 | 0.00 |
| H      |      |    |     |     |        |        |        |      |      |
| HETATM | 5937 | H3 | PRP | 373 | 3.141  | 3.254  | 41.847 | 1.00 | 0.00 |
| H      |      |    |     |     |        |        |        |      |      |
| HETATM | 5938 | C2 | PRP | 373 | 5.244  | 2.957  | 41.511 | 1.00 | 0.00 |
| C      |      |    |     |     |        |        |        |      |      |
| HETATM | 5939 | H4 | PRP | 373 | 5.309  | 3.380  | 40.509 | 1.00 | 0.00 |
| H      |      |    |     |     |        |        |        |      |      |
| HETATM | 5940 | O2 | PRP | 373 | 4.972  | 1.518  | 41.399 | 1.00 | 0.00 |
| O      |      |    |     |     |        |        |        |      |      |
| HETATM | 5941 | H5 | PRP | 373 | 4.699  | 1.313  | 40.502 | 1.00 | 0.00 |
| H      |      |    |     |     |        |        |        |      |      |
| HETATM | 5942 | C3 | PRP | 373 | 6.585  | 3.210  | 42.276 | 1.00 | 0.00 |
| C      |      |    |     |     |        |        |        |      |      |
| HETATM | 5943 | H6 | PRP | 373 | 7.444  | 2.752  | 41.785 | 1.00 | 0.00 |
| H      |      |    |     |     |        |        |        |      |      |
| HETATM | 5944 | H7 | PRP | 373 | 6.786  | 4.281  | 42.280 | 1.00 | 0.00 |
| H      |      |    |     |     |        |        |        |      |      |
| HETATM | 5945 | H8 | PRP | 373 | 6.549  | 3.007  | 43.346 | 1.00 | 0.00 |
| H      |      |    |     |     |        |        |        |      |      |
| HETATM | 5946 | O1 | PRP | 374 | 21.981 | 10.991 | 36.354 | 1.00 | 0.00 |
| O      |      |    |     |     |        |        |        |      |      |
| HETATM | 5947 | H1 | PRP | 374 | 22.589 | 11.547 | 35.861 | 1.00 | 0.00 |
| H      |      |    |     |     |        |        |        |      |      |
| HETATM | 5948 | C1 | PRP | 374 | 20.733 | 11.671 | 36.390 | 1.00 | 0.00 |
| C      |      |    |     |     |        |        |        |      |      |
| HETATM | 5949 | H2 | PRP | 374 | 20.192 | 11.428 | 37.304 | 1.00 | 0.00 |
| H      |      |    |     |     |        |        |        |      |      |
| HETATM | 5950 | H3 | PRP | 374 | 21.018 | 12.721 | 36.459 | 1.00 | 0.00 |
| H      |      |    |     |     |        |        |        |      |      |
| HETATM | 5951 | C2 | PRP | 374 | 19.819 | 11.396 | 35.146 | 1.00 | 0.00 |
| C      |      |    |     |     |        |        |        |      |      |
| HETATM | 5952 | H4 | PRP | 374 | 19.958 | 10.327 | 34.983 | 1.00 | 0.00 |
| H      |      |    |     |     |        |        |        |      |      |
| HETATM | 5953 | O2 | PRP | 374 | 20.150 | 12.058 | 33.943 | 1.00 | 0.00 |
| O      |      |    |     |     |        |        |        |      |      |
| HETATM | 5954 | H5 | PRP | 374 | 21.095 | 11.950 | 33.812 | 1.00 | 0.00 |
| H      |      |    |     |     |        |        |        |      |      |
| HETATM | 5955 | C3 | PRP | 374 | 18.308 | 11.704 | 35.285 | 1.00 | 0.00 |
| C      |      |    |     |     |        |        |        |      |      |
| HETATM | 5956 | H6 | PRP | 374 | 17.956 | 12.736 | 35.274 | 1.00 | 0.00 |
| H      |      |    |     |     |        |        |        |      |      |
| HETATM | 5957 | H7 | PRP | 374 | 17.735 | 11.270 | 34.466 | 1.00 | 0.00 |
| H      |      |    |     |     |        |        |        |      |      |
| HETATM | 5958 | H8 | PRP | 374 | 17.918 | 11.190 | 36.163 | 1.00 | 0.00 |
| H      |      |    |     |     |        |        |        |      |      |
| HETATM | 5959 | O1 | PRP | 375 | 13.070 | 17.863 | 35.211 | 1.00 | 0.00 |
| O      |      |    |     |     |        |        |        |      |      |
| HETATM | 5960 | H1 | PRP | 375 | 13.495 | 17.005 | 35.147 | 1.00 | 0.00 |
| H      |      |    |     |     |        |        |        |      |      |
| HETATM | 5961 | C1 | PRP | 375 | 13.273 | 18.441 | 33.993 | 1.00 | 0.00 |
| C      |      |    |     |     |        |        |        |      |      |
| HETATM | 5962 | H2 | PRP | 375 | 12.382 | 18.144 | 33.440 | 1.00 | 0.00 |
| H      |      |    |     |     |        |        |        |      |      |
| HETATM | 5963 | H3 | PRP | 375 | 13.267 | 19.520 | 34.151 | 1.00 | 0.00 |
| H      |      |    |     |     |        |        |        |      |      |



|        |      |    |     |     |        |        |        |      |      |
|--------|------|----|-----|-----|--------|--------|--------|------|------|
| HETATM | 5964 | C2 | PRP | 375 | 14.559 | 17.992 | 33.367 | 1.00 | 0.00 |
| C      |      |    |     |     |        |        |        |      |      |
| HETATM | 5965 | H4 | PRP | 375 | 14.478 | 18.249 | 32.311 | 1.00 | 0.00 |
| H      |      |    |     |     |        |        |        |      |      |
| HETATM | 5966 | O2 | PRP | 375 | 14.681 | 16.588 | 33.471 | 1.00 | 0.00 |
| O      |      |    |     |     |        |        |        |      |      |
| HETATM | 5967 | H5 | PRP | 375 | 14.160 | 16.228 | 32.749 | 1.00 | 0.00 |
| H      |      |    |     |     |        |        |        |      |      |
| HETATM | 5968 | C3 | PRP | 375 | 15.741 | 18.786 | 34.004 | 1.00 | 0.00 |
| C      |      |    |     |     |        |        |        |      |      |
| HETATM | 5969 | H6 | PRP | 375 | 15.646 | 19.802 | 33.623 | 1.00 | 0.00 |
| H      |      |    |     |     |        |        |        |      |      |
| HETATM | 5970 | H7 | PRP | 375 | 15.651 | 18.743 | 35.090 | 1.00 | 0.00 |
| H      |      |    |     |     |        |        |        |      |      |
| HETATM | 5971 | H8 | PRP | 375 | 16.732 | 18.433 | 33.718 | 1.00 | 0.00 |
| H      |      |    |     |     |        |        |        |      |      |
| HETATM | 5972 | O1 | PRP | 376 | 14.299 | 11.479 | 32.653 | 1.00 | 0.00 |
| O      |      |    |     |     |        |        |        |      |      |
| HETATM | 5973 | H1 | PRP | 376 | 13.924 | 11.902 | 33.430 | 1.00 | 0.00 |
| H      |      |    |     |     |        |        |        |      |      |
| HETATM | 5974 | C1 | PRP | 376 | 13.306 | 10.744 | 31.958 | 1.00 | 0.00 |
| C      |      |    |     |     |        |        |        |      |      |
| HETATM | 5975 | H2 | PRP | 376 | 13.556 | 9.742  | 32.307 | 1.00 | 0.00 |
| H      |      |    |     |     |        |        |        |      |      |
| HETATM | 5976 | H3 | PRP | 376 | 12.379 | 11.152 | 32.360 | 1.00 | 0.00 |
| H      |      |    |     |     |        |        |        |      |      |
| HETATM | 5977 | C2 | PRP | 376 | 13.457 | 10.876 | 30.432 | 1.00 | 0.00 |
| C      |      |    |     |     |        |        |        |      |      |
| HETATM | 5978 | H4 | PRP | 376 | 14.479 | 11.234 | 30.307 | 1.00 | 0.00 |
| H      |      |    |     |     |        |        |        |      |      |
| HETATM | 5979 | O2 | PRP | 376 | 12.659 | 11.921 | 29.903 | 1.00 | 0.00 |
| O      |      |    |     |     |        |        |        |      |      |
| HETATM | 5980 | H5 | PRP | 376 | 11.769 | 11.591 | 30.048 | 1.00 | 0.00 |
| H      |      |    |     |     |        |        |        |      |      |
| HETATM | 5981 | C3 | PRP | 376 | 13.211 | 9.584  | 29.658 | 1.00 | 0.00 |
| C      |      |    |     |     |        |        |        |      |      |
| HETATM | 5982 | H6 | PRP | 376 | 12.147 | 9.367  | 29.749 | 1.00 | 0.00 |
| H      |      |    |     |     |        |        |        |      |      |
| HETATM | 5983 | H7 | PRP | 376 | 13.521 | 9.732  | 28.623 | 1.00 | 0.00 |
| H      |      |    |     |     |        |        |        |      |      |
| HETATM | 5984 | H8 | PRP | 376 | 13.714 | 8.719  | 30.091 | 1.00 | 0.00 |
| H      |      |    |     |     |        |        |        |      |      |
| HETATM | 5985 | O1 | PRP | 377 | 12.851 | -2.120 | 30.552 | 1.00 | 0.00 |
| O      |      |    |     |     |        |        |        |      |      |
| HETATM | 5986 | H1 | PRP | 377 | 13.144 | -2.977 | 30.871 | 1.00 | 0.00 |
| H      |      |    |     |     |        |        |        |      |      |
| HETATM | 5987 | C1 | PRP | 377 | 13.985 | -1.262 | 30.613 | 1.00 | 0.00 |
| C      |      |    |     |     |        |        |        |      |      |
| HETATM | 5988 | H2 | PRP | 377 | 13.551 | -0.326 | 30.966 | 1.00 | 0.00 |
| H      |      |    |     |     |        |        |        |      |      |
| HETATM | 5989 | H3 | PRP | 377 | 14.767 | -1.651 | 31.265 | 1.00 | 0.00 |
| H      |      |    |     |     |        |        |        |      |      |
| HETATM | 5990 | C2 | PRP | 377 | 14.441 | -1.096 | 29.068 | 1.00 | 0.00 |
| C      |      |    |     |     |        |        |        |      |      |
| HETATM | 5991 | H4 | PRP | 377 | 13.517 | -0.778 | 28.584 | 1.00 | 0.00 |
| H      |      |    |     |     |        |        |        |      |      |

|        |      |    |     |     |        |        |        |      |      |
|--------|------|----|-----|-----|--------|--------|--------|------|------|
| HETATM | 5992 | O2 | PRP | 377 | 15.078 | -2.230 | 28.567 | 1.00 | 0.00 |
| O      |      |    |     |     |        |        |        |      |      |
| HETATM | 5993 | H5 | PRP | 377 | 14.642 | -3.062 | 28.765 | 1.00 | 0.00 |
| H      |      |    |     |     |        |        |        |      |      |
| HETATM | 5994 | C3 | PRP | 377 | 15.457 | 0.097  | 29.046 | 1.00 | 0.00 |
| C      |      |    |     |     |        |        |        |      |      |
| HETATM | 5995 | H6 | PRP | 377 | 15.113 | 1.106  | 29.270 | 1.00 | 0.00 |
| H      |      |    |     |     |        |        |        |      |      |
| HETATM | 5996 | H7 | PRP | 377 | 16.184 | -0.131 | 29.825 | 1.00 | 0.00 |
| H      |      |    |     |     |        |        |        |      |      |
| HETATM | 5997 | H8 | PRP | 377 | 15.822 | 0.195  | 28.023 | 1.00 | 0.00 |
| H      |      |    |     |     |        |        |        |      |      |
| HETATM | 5998 | O1 | PRP | 378 | 7.685  | 17.118 | 16.935 | 1.00 | 0.00 |
| O      |      |    |     |     |        |        |        |      |      |
| HETATM | 5999 | H1 | PRP | 378 | 7.156  | 16.353 | 16.698 | 1.00 | 0.00 |
| H      |      |    |     |     |        |        |        |      |      |
| HETATM | 6000 | C1 | PRP | 378 | 8.516  | 16.732 | 18.017 | 1.00 | 0.00 |
| C      |      |    |     |     |        |        |        |      |      |
| HETATM | 6001 | H2 | PRP | 378 | 7.821  | 16.431 | 18.801 | 1.00 | 0.00 |
| H      |      |    |     |     |        |        |        |      |      |
| HETATM | 6002 | H3 | PRP | 378 | 9.125  | 15.894 | 17.678 | 1.00 | 0.00 |
| H      |      |    |     |     |        |        |        |      |      |
| HETATM | 6003 | C2 | PRP | 378 | 9.372  | 17.932 | 18.419 | 1.00 | 0.00 |
| C      |      |    |     |     |        |        |        |      |      |
| HETATM | 6004 | H4 | PRP | 378 | 8.735  | 18.813 | 18.510 | 1.00 | 0.00 |
| H      |      |    |     |     |        |        |        |      |      |
| HETATM | 6005 | O2 | PRP | 378 | 10.364 | 18.327 | 17.488 | 1.00 | 0.00 |
| O      |      |    |     |     |        |        |        |      |      |
| HETATM | 6006 | H5 | PRP | 378 | 9.964  | 18.392 | 16.618 | 1.00 | 0.00 |
| H      |      |    |     |     |        |        |        |      |      |
| HETATM | 6007 | C3 | PRP | 378 | 10.002 | 17.502 | 19.682 | 1.00 | 0.00 |
| C      |      |    |     |     |        |        |        |      |      |
| HETATM | 6008 | H6 | PRP | 378 | 10.633 | 18.339 | 19.983 | 1.00 | 0.00 |
| H      |      |    |     |     |        |        |        |      |      |
| HETATM | 6009 | H7 | PRP | 378 | 9.249  | 17.295 | 20.442 | 1.00 | 0.00 |
| H      |      |    |     |     |        |        |        |      |      |
| HETATM | 6010 | H8 | PRP | 378 | 10.622 | 16.636 | 19.450 | 1.00 | 0.00 |
| H      |      |    |     |     |        |        |        |      |      |
| HETATM | 6011 | O1 | PRP | 379 | 14.988 | -0.810 | 44.736 | 1.00 | 0.00 |
| O      |      |    |     |     |        |        |        |      |      |
| HETATM | 6012 | H1 | PRP | 379 | 14.258 | -0.409 | 45.213 | 1.00 | 0.00 |
| H      |      |    |     |     |        |        |        |      |      |
| HETATM | 6013 | C1 | PRP | 379 | 15.166 | -0.110 | 43.517 | 1.00 | 0.00 |
| C      |      |    |     |     |        |        |        |      |      |
| HETATM | 6014 | H2 | PRP | 379 | 16.239 | -0.026 | 43.347 | 1.00 | 0.00 |
| H      |      |    |     |     |        |        |        |      |      |
| HETATM | 6015 | H3 | PRP | 379 | 14.744 | -0.595 | 42.637 | 1.00 | 0.00 |
| H      |      |    |     |     |        |        |        |      |      |
| HETATM | 6016 | C2 | PRP | 379 | 14.537 | 1.290  | 43.531 | 1.00 | 0.00 |
| C      |      |    |     |     |        |        |        |      |      |
| HETATM | 6017 | H4 | PRP | 379 | 13.536 | 1.157  | 43.940 | 1.00 | 0.00 |
| H      |      |    |     |     |        |        |        |      |      |
| HETATM | 6018 | O2 | PRP | 379 | 14.392 | 1.812  | 42.222 | 1.00 | 0.00 |
| O      |      |    |     |     |        |        |        |      |      |
| HETATM | 6019 | H5 | PRP | 379 | 14.196 | 2.749  | 42.295 | 1.00 | 0.00 |
| H      |      |    |     |     |        |        |        |      |      |

|        |      |    |     |     |        |        |        |      |      |
|--------|------|----|-----|-----|--------|--------|--------|------|------|
| HETATM | 6020 | C3 | PRP | 379 | 15.316 | 2.154  | 44.489 | 1.00 | 0.00 |
| C      |      |    |     |     |        |        |        |      |      |
| HETATM | 6021 | H6 | PRP | 379 | 15.800 | 1.606  | 45.298 | 1.00 | 0.00 |
| H      |      |    |     |     |        |        |        |      |      |
| HETATM | 6022 | H7 | PRP | 379 | 16.153 | 2.570  | 43.929 | 1.00 | 0.00 |
| H      |      |    |     |     |        |        |        |      |      |
| HETATM | 6023 | H8 | PRP | 379 | 14.674 | 2.947  | 44.873 | 1.00 | 0.00 |
| H      |      |    |     |     |        |        |        |      |      |
| HETATM | 6024 | O1 | PRP | 380 | 12.888 | 18.485 | 25.289 | 1.00 | 0.00 |
| O      |      |    |     |     |        |        |        |      |      |
| HETATM | 6025 | H1 | PRP | 380 | 12.400 | 18.187 | 26.060 | 1.00 | 0.00 |
| H      |      |    |     |     |        |        |        |      |      |
| HETATM | 6026 | C1 | PRP | 380 | 13.421 | 17.185 | 24.785 | 1.00 | 0.00 |
| C      |      |    |     |     |        |        |        |      |      |
| HETATM | 6027 | H2 | PRP | 380 | 14.511 | 17.210 | 24.805 | 1.00 | 0.00 |
| H      |      |    |     |     |        |        |        |      |      |
| HETATM | 6028 | H3 | PRP | 380 | 13.007 | 16.318 | 25.299 | 1.00 | 0.00 |
| H      |      |    |     |     |        |        |        |      |      |
| HETATM | 6029 | C2 | PRP | 380 | 13.060 | 17.209 | 23.219 | 1.00 | 0.00 |
| C      |      |    |     |     |        |        |        |      |      |
| HETATM | 6030 | H4 | PRP | 380 | 13.690 | 16.455 | 22.748 | 1.00 | 0.00 |
| H      |      |    |     |     |        |        |        |      |      |
| HETATM | 6031 | O2 | PRP | 380 | 13.285 | 18.515 | 22.755 | 1.00 | 0.00 |
| O      |      |    |     |     |        |        |        |      |      |
| HETATM | 6032 | H5 | PRP | 380 | 13.525 | 19.008 | 23.542 | 1.00 | 0.00 |
| H      |      |    |     |     |        |        |        |      |      |
| HETATM | 6033 | C3 | PRP | 380 | 11.631 | 16.837 | 22.989 | 1.00 | 0.00 |
| C      |      |    |     |     |        |        |        |      |      |
| HETATM | 6034 | H6 | PRP | 380 | 11.558 | 15.754 | 23.084 | 1.00 | 0.00 |
| H      |      |    |     |     |        |        |        |      |      |
| HETATM | 6035 | H7 | PRP | 380 | 11.069 | 17.352 | 23.768 | 1.00 | 0.00 |
| H      |      |    |     |     |        |        |        |      |      |
| HETATM | 6036 | H8 | PRP | 380 | 11.240 | 17.071 | 21.999 | 1.00 | 0.00 |
| H      |      |    |     |     |        |        |        |      |      |
| HETATM | 6037 | O1 | PRP | 381 | 20.737 | -0.084 | 41.314 | 1.00 | 0.00 |
| O      |      |    |     |     |        |        |        |      |      |
| HETATM | 6038 | H1 | PRP | 381 | 20.788 | 0.810  | 41.660 | 1.00 | 0.00 |
| H      |      |    |     |     |        |        |        |      |      |
| HETATM | 6039 | C1 | PRP | 381 | 19.974 | -0.282 | 40.161 | 1.00 | 0.00 |
| C      |      |    |     |     |        |        |        |      |      |
| HETATM | 6040 | H2 | PRP | 381 | 19.836 | -1.309 | 39.824 | 1.00 | 0.00 |
| H      |      |    |     |     |        |        |        |      |      |
| HETATM | 6041 | H3 | PRP | 381 | 18.983 | 0.125  | 40.362 | 1.00 | 0.00 |
| H      |      |    |     |     |        |        |        |      |      |
| HETATM | 6042 | C2 | PRP | 381 | 20.628 | 0.309  | 38.905 | 1.00 | 0.00 |
| C      |      |    |     |     |        |        |        |      |      |
| HETATM | 6043 | H4 | PRP | 381 | 19.952 | -0.153 | 38.186 | 1.00 | 0.00 |
| H      |      |    |     |     |        |        |        |      |      |
| HETATM | 6044 | O2 | PRP | 381 | 21.904 | -0.056 | 38.682 | 1.00 | 0.00 |
| O      |      |    |     |     |        |        |        |      |      |
| HETATM | 6045 | H5 | PRP | 381 | 22.452 | 0.731  | 38.623 | 1.00 | 0.00 |
| H      |      |    |     |     |        |        |        |      |      |
| HETATM | 6046 | C3 | PRP | 381 | 20.481 | 1.785  | 38.729 | 1.00 | 0.00 |
| C      |      |    |     |     |        |        |        |      |      |
| HETATM | 6047 | H6 | PRP | 381 | 20.665 | 2.244  | 39.700 | 1.00 | 0.00 |
| H      |      |    |     |     |        |        |        |      |      |

|        |      |    |     |     |        |        |        |      |      |
|--------|------|----|-----|-----|--------|--------|--------|------|------|
| HETATM | 6048 | H7 | PRP | 381 | 21.170 | 2.105  | 37.947 | 1.00 | 0.00 |
| H      |      |    |     |     |        |        |        |      |      |
| HETATM | 6049 | H8 | PRP | 381 | 19.485 | 2.122  | 38.441 | 1.00 | 0.00 |
| H      |      |    |     |     |        |        |        |      |      |
| HETATM | 6050 | O1 | PRP | 382 | 22.587 | 1.407  | 33.845 | 1.00 | 0.00 |
| O      |      |    |     |     |        |        |        |      |      |
| HETATM | 6051 | H1 | PRP | 382 | 22.031 | 1.788  | 33.161 | 1.00 | 0.00 |
| H      |      |    |     |     |        |        |        |      |      |
| HETATM | 6052 | C1 | PRP | 382 | 22.305 | 0.019  | 33.852 | 1.00 | 0.00 |
| C      |      |    |     |     |        |        |        |      |      |
| HETATM | 6053 | H2 | PRP | 382 | 21.227 | -0.134 | 33.814 | 1.00 | 0.00 |
| H      |      |    |     |     |        |        |        |      |      |
| HETATM | 6054 | H3 | PRP | 382 | 22.878 | -0.559 | 33.126 | 1.00 | 0.00 |
| H      |      |    |     |     |        |        |        |      |      |
| HETATM | 6055 | C2 | PRP | 382 | 22.898 | -0.497 | 35.118 | 1.00 | 0.00 |
| C      |      |    |     |     |        |        |        |      |      |
| HETATM | 6056 | H4 | PRP | 382 | 22.517 | 0.134  | 35.921 | 1.00 | 0.00 |
| H      |      |    |     |     |        |        |        |      |      |
| HETATM | 6057 | O2 | PRP | 382 | 24.293 | -0.495 | 34.967 | 1.00 | 0.00 |
| O      |      |    |     |     |        |        |        |      |      |
| HETATM | 6058 | H5 | PRP | 382 | 24.659 | 0.391  | 34.917 | 1.00 | 0.00 |
| H      |      |    |     |     |        |        |        |      |      |
| HETATM | 6059 | C3 | PRP | 382 | 22.363 | -1.928 | 35.402 | 1.00 | 0.00 |
| C      |      |    |     |     |        |        |        |      |      |
| HETATM | 6060 | H6 | PRP | 382 | 22.624 | -2.551 | 34.547 | 1.00 | 0.00 |
| H      |      |    |     |     |        |        |        |      |      |
| HETATM | 6061 | H7 | PRP | 382 | 22.882 | -2.377 | 36.249 | 1.00 | 0.00 |
| H      |      |    |     |     |        |        |        |      |      |
| HETATM | 6062 | H8 | PRP | 382 | 21.280 | -1.933 | 35.523 | 1.00 | 0.00 |
| H      |      |    |     |     |        |        |        |      |      |
| HETATM | 6063 | O1 | PRP | 383 | 15.748 | 4.573  | 35.640 | 1.00 | 0.00 |
| O      |      |    |     |     |        |        |        |      |      |
| HETATM | 6064 | H1 | PRP | 383 | 16.093 | 3.692  | 35.482 | 1.00 | 0.00 |
| H      |      |    |     |     |        |        |        |      |      |
| HETATM | 6065 | C1 | PRP | 383 | 16.750 | 5.219  | 36.381 | 1.00 | 0.00 |
| C      |      |    |     |     |        |        |        |      |      |
| HETATM | 6066 | H2 | PRP | 383 | 16.370 | 6.186  | 36.708 | 1.00 | 0.00 |
| H      |      |    |     |     |        |        |        |      |      |
| HETATM | 6067 | H3 | PRP | 383 | 16.991 | 4.705  | 37.312 | 1.00 | 0.00 |
| H      |      |    |     |     |        |        |        |      |      |
| HETATM | 6068 | C2 | PRP | 383 | 18.023 | 5.336  | 35.455 | 1.00 | 0.00 |
| C      |      |    |     |     |        |        |        |      |      |
| HETATM | 6069 | H4 | PRP | 383 | 17.761 | 5.511  | 34.412 | 1.00 | 0.00 |
| H      |      |    |     |     |        |        |        |      |      |
| HETATM | 6070 | O2 | PRP | 383 | 18.700 | 4.073  | 35.649 | 1.00 | 0.00 |
| O      |      |    |     |     |        |        |        |      |      |
| HETATM | 6071 | H5 | PRP | 383 | 18.210 | 3.393  | 35.180 | 1.00 | 0.00 |
| H      |      |    |     |     |        |        |        |      |      |
| HETATM | 6072 | C3 | PRP | 383 | 18.928 | 6.511  | 35.785 | 1.00 | 0.00 |
| C      |      |    |     |     |        |        |        |      |      |
| HETATM | 6073 | H6 | PRP | 383 | 19.255 | 6.385  | 36.818 | 1.00 | 0.00 |
| H      |      |    |     |     |        |        |        |      |      |
| HETATM | 6074 | H7 | PRP | 383 | 19.755 | 6.500  | 35.075 | 1.00 | 0.00 |
| H      |      |    |     |     |        |        |        |      |      |
| HETATM | 6075 | H8 | PRP | 383 | 18.411 | 7.460  | 35.644 | 1.00 | 0.00 |
| H      |      |    |     |     |        |        |        |      |      |

|        |      |    |     |     |        |         |        |      |      |
|--------|------|----|-----|-----|--------|---------|--------|------|------|
| HETATM | 6076 | O1 | PRP | 384 | 0.102  | 4.822   | 20.721 | 1.00 | 0.00 |
| O      |      |    |     |     |        |         |        |      |      |
| HETATM | 6077 | H1 | PRP | 384 | -0.712 | 4.923   | 20.221 | 1.00 | 0.00 |
| H      |      |    |     |     |        |         |        |      |      |
| HETATM | 6078 | C1 | PRP | 384 | 0.848  | 5.857   | 20.083 | 1.00 | 0.00 |
| C      |      |    |     |     |        |         |        |      |      |
| HETATM | 6079 | H2 | PRP | 384 | 1.884  | 5.676   | 20.370 | 1.00 | 0.00 |
| H      |      |    |     |     |        |         |        |      |      |
| HETATM | 6080 | H3 | PRP | 384 | 0.747  | 5.825   | 18.998 | 1.00 | 0.00 |
| H      |      |    |     |     |        |         |        |      |      |
| HETATM | 6081 | C2 | PRP | 384 | 0.455  | 7.250   | 20.623 | 1.00 | 0.00 |
| C      |      |    |     |     |        |         |        |      |      |
| HETATM | 6082 | H4 | PRP | 384 | 0.385  | 7.231   | 21.710 | 1.00 | 0.00 |
| H      |      |    |     |     |        |         |        |      |      |
| HETATM | 6083 | O2 | PRP | 384 | -0.813 | 7.729   | 20.080 | 1.00 | 0.00 |
| O      |      |    |     |     |        |         |        |      |      |
| HETATM | 6084 | H5 | PRP | 384 | -1.296 | 8.106   | 20.818 | 1.00 | 0.00 |
| H      |      |    |     |     |        |         |        |      |      |
| HETATM | 6085 | C3 | PRP | 384 | 1.512  | 8.286   | 20.224 | 1.00 | 0.00 |
| C      |      |    |     |     |        |         |        |      |      |
| HETATM | 6086 | H6 | PRP | 384 | 1.469  | 8.477   | 19.152 | 1.00 | 0.00 |
| H      |      |    |     |     |        |         |        |      |      |
| HETATM | 6087 | H7 | PRP | 384 | 1.457  | 9.268   | 20.693 | 1.00 | 0.00 |
| H      |      |    |     |     |        |         |        |      |      |
| HETATM | 6088 | H8 | PRP | 384 | 2.460  | 7.819   | 20.492 | 1.00 | 0.00 |
| H      |      |    |     |     |        |         |        |      |      |
| HETATM | 6089 | O1 | PRP | 385 | 27.287 | -11.718 | 39.091 | 1.00 | 0.00 |
| O      |      |    |     |     |        |         |        |      |      |
| HETATM | 6090 | H1 | PRP | 385 | 26.420 | -11.306 | 39.093 | 1.00 | 0.00 |
| H      |      |    |     |     |        |         |        |      |      |
| HETATM | 6091 | C1 | PRP | 385 | 27.334 | -12.510 | 40.331 | 1.00 | 0.00 |
| C      |      |    |     |     |        |         |        |      |      |
| HETATM | 6092 | H2 | PRP | 385 | 26.894 | -13.485 | 40.120 | 1.00 | 0.00 |
| H      |      |    |     |     |        |         |        |      |      |
| HETATM | 6093 | H3 | PRP | 385 | 28.366 | -12.680 | 40.635 | 1.00 | 0.00 |
| H      |      |    |     |     |        |         |        |      |      |
| HETATM | 6094 | C2 | PRP | 385 | 26.766 | -11.872 | 41.555 | 1.00 | 0.00 |
| C      |      |    |     |     |        |         |        |      |      |
| HETATM | 6095 | H4 | PRP | 385 | 27.049 | -12.530 | 42.376 | 1.00 | 0.00 |
| H      |      |    |     |     |        |         |        |      |      |
| HETATM | 6096 | O2 | PRP | 385 | 25.360 | -11.840 | 41.388 | 1.00 | 0.00 |
| O      |      |    |     |     |        |         |        |      |      |
| HETATM | 6097 | H5 | PRP | 385 | 24.980 | -11.630 | 42.244 | 1.00 | 0.00 |
| H      |      |    |     |     |        |         |        |      |      |
| HETATM | 6098 | C3 | PRP | 385 | 27.285 | -10.452 | 41.772 | 1.00 | 0.00 |
| C      |      |    |     |     |        |         |        |      |      |
| HETATM | 6099 | H6 | PRP | 385 | 28.360 | -10.478 | 41.591 | 1.00 | 0.00 |
| H      |      |    |     |     |        |         |        |      |      |
| HETATM | 6100 | H7 | PRP | 385 | 26.797 | -9.741  | 41.106 | 1.00 | 0.00 |
| H      |      |    |     |     |        |         |        |      |      |
| HETATM | 6101 | H8 | PRP | 385 | 27.125 | -10.122 | 42.799 | 1.00 | 0.00 |
| H      |      |    |     |     |        |         |        |      |      |
| HETATM | 6102 | O1 | PRP | 386 | 23.852 | 14.417  | 40.207 | 1.00 | 0.00 |
| O      |      |    |     |     |        |         |        |      |      |
| HETATM | 6103 | H1 | PRP | 386 | 23.463 | 14.124  | 41.035 | 1.00 | 0.00 |
| H      |      |    |     |     |        |         |        |      |      |

|        |      |    |     |     |        |        |        |      |      |
|--------|------|----|-----|-----|--------|--------|--------|------|------|
| HETATM | 6104 | C1 | PRP | 386 | 22.847 | 14.181 | 39.358 | 1.00 | 0.00 |
| C      |      |    |     |     |        |        |        |      |      |
| HETATM | 6105 | H2 | PRP | 386 | 23.235 | 14.377 | 38.358 | 1.00 | 0.00 |
| H      |      |    |     |     |        |        |        |      |      |
| HETATM | 6106 | H3 | PRP | 386 | 22.566 | 13.128 | 39.385 | 1.00 | 0.00 |
| H      |      |    |     |     |        |        |        |      |      |
| HETATM | 6107 | C2 | PRP | 386 | 21.658 | 15.103 | 39.741 | 1.00 | 0.00 |
| C      |      |    |     |     |        |        |        |      |      |
| HETATM | 6108 | H4 | PRP | 386 | 22.083 | 16.092 | 39.910 | 1.00 | 0.00 |
| H      |      |    |     |     |        |        |        |      |      |
| HETATM | 6109 | O2 | PRP | 386 | 20.936 | 14.619 | 40.805 | 1.00 | 0.00 |
| O      |      |    |     |     |        |        |        |      |      |
| HETATM | 6110 | H5 | PRP | 386 | 21.363 | 14.822 | 41.641 | 1.00 | 0.00 |
| H      |      |    |     |     |        |        |        |      |      |
| HETATM | 6111 | C3 | PRP | 386 | 20.832 | 15.214 | 38.465 | 1.00 | 0.00 |
| C      |      |    |     |     |        |        |        |      |      |
| HETATM | 6112 | H6 | PRP | 386 | 20.646 | 14.280 | 37.935 | 1.00 | 0.00 |
| H      |      |    |     |     |        |        |        |      |      |
| HETATM | 6113 | H7 | PRP | 386 | 19.833 | 15.625 | 38.611 | 1.00 | 0.00 |
| H      |      |    |     |     |        |        |        |      |      |
| HETATM | 6114 | H8 | PRP | 386 | 21.387 | 15.815 | 37.746 | 1.00 | 0.00 |
| H      |      |    |     |     |        |        |        |      |      |
| HETATM | 6115 | O1 | PRP | 387 | 8.536  | 11.193 | 37.864 | 1.00 | 0.00 |
| O      |      |    |     |     |        |        |        |      |      |
| HETATM | 6116 | H1 | PRP | 387 | 9.371  | 11.367 | 38.303 | 1.00 | 0.00 |
| H      |      |    |     |     |        |        |        |      |      |
| HETATM | 6117 | C1 | PRP | 387 | 8.295  | 9.822  | 38.175 | 1.00 | 0.00 |
| C      |      |    |     |     |        |        |        |      |      |
| HETATM | 6118 | H2 | PRP | 387 | 8.148  | 9.558  | 39.223 | 1.00 | 0.00 |
| H      |      |    |     |     |        |        |        |      |      |
| HETATM | 6119 | H3 | PRP | 387 | 7.427  | 9.452  | 37.631 | 1.00 | 0.00 |
| H      |      |    |     |     |        |        |        |      |      |
| HETATM | 6120 | C2 | PRP | 387 | 9.483  | 9.056  | 37.696 | 1.00 | 0.00 |
| C      |      |    |     |     |        |        |        |      |      |
| HETATM | 6121 | H4 | PRP | 387 | 9.479  | 8.012  | 38.011 | 1.00 | 0.00 |
| H      |      |    |     |     |        |        |        |      |      |
| HETATM | 6122 | O2 | PRP | 387 | 10.606 | 9.662  | 38.393 | 1.00 | 0.00 |
| O      |      |    |     |     |        |        |        |      |      |
| HETATM | 6123 | H5 | PRP | 387 | 11.386 | 9.186  | 38.096 | 1.00 | 0.00 |
| H      |      |    |     |     |        |        |        |      |      |
| HETATM | 6124 | C3 | PRP | 387 | 9.686  | 9.146  | 36.220 | 1.00 | 0.00 |
| C      |      |    |     |     |        |        |        |      |      |
| HETATM | 6125 | H6 | PRP | 387 | 10.407 | 8.361  | 35.992 | 1.00 | 0.00 |
| H      |      |    |     |     |        |        |        |      |      |
| HETATM | 6126 | H7 | PRP | 387 | 8.783  | 8.985  | 35.631 | 1.00 | 0.00 |
| H      |      |    |     |     |        |        |        |      |      |
| HETATM | 6127 | H8 | PRP | 387 | 10.097 | 10.080 | 35.836 | 1.00 | 0.00 |
| H      |      |    |     |     |        |        |        |      |      |
| HETATM | 6128 | O1 | PRP | 388 | 13.299 | 11.794 | 41.491 | 1.00 | 0.00 |
| O      |      |    |     |     |        |        |        |      |      |
| HETATM | 6129 | H1 | PRP | 388 | 13.061 | 10.865 | 41.455 | 1.00 | 0.00 |
| H      |      |    |     |     |        |        |        |      |      |
| HETATM | 6130 | C1 | PRP | 388 | 12.684 | 12.307 | 40.281 | 1.00 | 0.00 |
| C      |      |    |     |     |        |        |        |      |      |
| HETATM | 6131 | H2 | PRP | 388 | 13.231 | 13.235 | 40.116 | 1.00 | 0.00 |
| H      |      |    |     |     |        |        |        |      |      |

|        |      |    |     |     |        |        |        |      |      |
|--------|------|----|-----|-----|--------|--------|--------|------|------|
| HETATM | 6132 | H3 | PRP | 388 | 12.789 | 11.568 | 39.486 | 1.00 | 0.00 |
| H      |      |    |     |     |        |        |        |      |      |
| HETATM | 6133 | C2 | PRP | 388 | 11.207 | 12.604 | 40.521 | 1.00 | 0.00 |
| C      |      |    |     |     |        |        |        |      |      |
| HETATM | 6134 | H4 | PRP | 388 | 11.154 | 13.380 | 41.284 | 1.00 | 0.00 |
| H      |      |    |     |     |        |        |        |      |      |
| HETATM | 6135 | O2 | PRP | 388 | 10.491 | 11.427 | 40.801 | 1.00 | 0.00 |
| O      |      |    |     |     |        |        |        |      |      |
| HETATM | 6136 | H5 | PRP | 388 | 10.798 | 10.789 | 40.152 | 1.00 | 0.00 |
| H      |      |    |     |     |        |        |        |      |      |
| HETATM | 6137 | C3 | PRP | 388 | 10.590 | 13.212 | 39.241 | 1.00 | 0.00 |
| C      |      |    |     |     |        |        |        |      |      |
| HETATM | 6138 | H6 | PRP | 388 | 10.646 | 12.523 | 38.398 | 1.00 | 0.00 |
| H      |      |    |     |     |        |        |        |      |      |
| HETATM | 6139 | H7 | PRP | 388 | 9.538  | 13.455 | 39.390 | 1.00 | 0.00 |
| H      |      |    |     |     |        |        |        |      |      |
| HETATM | 6140 | H8 | PRP | 388 | 11.131 | 14.142 | 39.066 | 1.00 | 0.00 |
| H      |      |    |     |     |        |        |        |      |      |
| HETATM | 6141 | O1 | PRP | 389 | 7.566  | 21.657 | 41.691 | 1.00 | 0.00 |
| O      |      |    |     |     |        |        |        |      |      |
| HETATM | 6142 | H1 | PRP | 389 | 6.959  | 22.192 | 42.206 | 1.00 | 0.00 |
| H      |      |    |     |     |        |        |        |      |      |
| HETATM | 6143 | C1 | PRP | 389 | 8.353  | 21.025 | 42.672 | 1.00 | 0.00 |
| C      |      |    |     |     |        |        |        |      |      |
| HETATM | 6144 | H2 | PRP | 389 | 7.950  | 21.286 | 43.651 | 1.00 | 0.00 |
| H      |      |    |     |     |        |        |        |      |      |
| HETATM | 6145 | H3 | PRP | 389 | 8.359  | 19.942 | 42.547 | 1.00 | 0.00 |
| H      |      |    |     |     |        |        |        |      |      |
| HETATM | 6146 | C2 | PRP | 389 | 9.861  | 21.605 | 42.562 | 1.00 | 0.00 |
| C      |      |    |     |     |        |        |        |      |      |
| HETATM | 6147 | H4 | PRP | 389 | 9.815  | 22.681 | 42.394 | 1.00 | 0.00 |
| H      |      |    |     |     |        |        |        |      |      |
| HETATM | 6148 | O2 | PRP | 389 | 10.552 | 20.946 | 41.533 | 1.00 | 0.00 |
| O      |      |    |     |     |        |        |        |      |      |
| HETATM | 6149 | H5 | PRP | 389 | 9.961  | 20.704 | 40.816 | 1.00 | 0.00 |
| H      |      |    |     |     |        |        |        |      |      |
| HETATM | 6150 | C3 | PRP | 389 | 10.711 | 21.172 | 43.808 | 1.00 | 0.00 |
| C      |      |    |     |     |        |        |        |      |      |
| HETATM | 6151 | H6 | PRP | 389 | 11.785 | 21.346 | 43.751 | 1.00 | 0.00 |
| H      |      |    |     |     |        |        |        |      |      |
| HETATM | 6152 | H7 | PRP | 389 | 10.339 | 21.691 | 44.692 | 1.00 | 0.00 |
| H      |      |    |     |     |        |        |        |      |      |
| HETATM | 6153 | H8 | PRP | 389 | 10.488 | 20.118 | 43.973 | 1.00 | 0.00 |
| H      |      |    |     |     |        |        |        |      |      |
| HETATM | 6154 | O1 | PRP | 390 | -3.937 | 16.537 | 40.851 | 1.00 | 0.00 |
| O      |      |    |     |     |        |        |        |      |      |
| HETATM | 6155 | H1 | PRP | 390 | -4.206 | 17.459 | 40.852 | 1.00 | 0.00 |
| H      |      |    |     |     |        |        |        |      |      |
| HETATM | 6156 | C1 | PRP | 390 | -4.842 | 15.717 | 40.197 | 1.00 | 0.00 |
| C      |      |    |     |     |        |        |        |      |      |
| HETATM | 6157 | H2 | PRP | 390 | -4.724 | 14.686 | 40.530 | 1.00 | 0.00 |
| H      |      |    |     |     |        |        |        |      |      |
| HETATM | 6158 | H3 | PRP | 390 | -5.827 | 15.886 | 40.632 | 1.00 | 0.00 |
| H      |      |    |     |     |        |        |        |      |      |
| HETATM | 6159 | C2 | PRP | 390 | -4.762 | 15.705 | 38.692 | 1.00 | 0.00 |
| C      |      |    |     |     |        |        |        |      |      |

|        |      |    |     |     |        |        |        |      |      |
|--------|------|----|-----|-----|--------|--------|--------|------|------|
| HETATM | 6160 | H4 | PRP | 390 | -5.591 | 15.085 | 38.352 | 1.00 | 0.00 |
| H      |      |    |     |     |        |        |        |      |      |
| HETATM | 6161 | O2 | PRP | 390 | -3.589 | 15.089 | 38.243 | 1.00 | 0.00 |
| O      |      |    |     |     |        |        |        |      |      |
| HETATM | 6162 | H5 | PRP | 390 | -2.987 | 15.100 | 38.990 | 1.00 | 0.00 |
| H      |      |    |     |     |        |        |        |      |      |
| HETATM | 6163 | C3 | PRP | 390 | -4.716 | 17.156 | 38.101 | 1.00 | 0.00 |
| C      |      |    |     |     |        |        |        |      |      |
| HETATM | 6164 | H6 | PRP | 390 | -5.090 | 17.122 | 37.078 | 1.00 | 0.00 |
| H      |      |    |     |     |        |        |        |      |      |
| HETATM | 6165 | H7 | PRP | 390 | -5.369 | 17.833 | 38.652 | 1.00 | 0.00 |
| H      |      |    |     |     |        |        |        |      |      |
| HETATM | 6166 | H8 | PRP | 390 | -3.715 | 17.584 | 38.043 | 1.00 | 0.00 |
| H      |      |    |     |     |        |        |        |      |      |
| HETATM | 6167 | O1 | PRP | 391 | 5.276  | 4.500  | 36.012 | 1.00 | 0.00 |
| O      |      |    |     |     |        |        |        |      |      |
| HETATM | 6168 | H1 | PRP | 391 | 4.557  | 5.131  | 35.939 | 1.00 | 0.00 |
| H      |      |    |     |     |        |        |        |      |      |
| HETATM | 6169 | C1 | PRP | 391 | 6.061  | 4.829  | 37.152 | 1.00 | 0.00 |
| C      |      |    |     |     |        |        |        |      |      |
| HETATM | 6170 | H2 | PRP | 391 | 6.602  | 5.733  | 36.872 | 1.00 | 0.00 |
| H      |      |    |     |     |        |        |        |      |      |
| HETATM | 6171 | H3 | PRP | 391 | 5.413  | 4.964  | 38.018 | 1.00 | 0.00 |
| H      |      |    |     |     |        |        |        |      |      |
| HETATM | 6172 | C2 | PRP | 391 | 7.217  | 3.835  | 37.319 | 1.00 | 0.00 |
| C      |      |    |     |     |        |        |        |      |      |
| HETATM | 6173 | H4 | PRP | 391 | 7.694  | 3.902  | 36.341 | 1.00 | 0.00 |
| H      |      |    |     |     |        |        |        |      |      |
| HETATM | 6174 | O2 | PRP | 391 | 6.759  | 2.467  | 37.518 | 1.00 | 0.00 |
| O      |      |    |     |     |        |        |        |      |      |
| HETATM | 6175 | H5 | PRP | 391 | 6.079  | 2.279  | 36.868 | 1.00 | 0.00 |
| H      |      |    |     |     |        |        |        |      |      |
| HETATM | 6176 | C3 | PRP | 391 | 8.276  | 4.280  | 38.405 | 1.00 | 0.00 |
| C      |      |    |     |     |        |        |        |      |      |
| HETATM | 6177 | H6 | PRP | 391 | 8.772  | 5.211  | 38.133 | 1.00 | 0.00 |
| H      |      |    |     |     |        |        |        |      |      |
| HETATM | 6178 | H7 | PRP | 391 | 7.760  | 4.594  | 39.312 | 1.00 | 0.00 |
| H      |      |    |     |     |        |        |        |      |      |
| HETATM | 6179 | H8 | PRP | 391 | 9.072  | 3.559  | 38.590 | 1.00 | 0.00 |
| H      |      |    |     |     |        |        |        |      |      |
| HETATM | 6180 | O1 | PRP | 392 | 13.375 | 16.441 | 39.117 | 1.00 | 0.00 |
| O      |      |    |     |     |        |        |        |      |      |
| HETATM | 6181 | H1 | PRP | 392 | 12.652 | 16.454 | 39.749 | 1.00 | 0.00 |
| H      |      |    |     |     |        |        |        |      |      |
| HETATM | 6182 | C1 | PRP | 392 | 13.760 | 17.740 | 38.831 | 1.00 | 0.00 |
| C      |      |    |     |     |        |        |        |      |      |
| HETATM | 6183 | H2 | PRP | 392 | 14.413 | 18.194 | 39.576 | 1.00 | 0.00 |
| H      |      |    |     |     |        |        |        |      |      |
| HETATM | 6184 | H3 | PRP | 392 | 14.426 | 17.533 | 37.993 | 1.00 | 0.00 |
| H      |      |    |     |     |        |        |        |      |      |
| HETATM | 6185 | C2 | PRP | 392 | 12.524 | 18.709 | 38.463 | 1.00 | 0.00 |
| C      |      |    |     |     |        |        |        |      |      |
| HETATM | 6186 | H4 | PRP | 392 | 11.851 | 18.859 | 39.307 | 1.00 | 0.00 |
| H      |      |    |     |     |        |        |        |      |      |
| HETATM | 6187 | O2 | PRP | 392 | 11.813 | 18.082 | 37.421 | 1.00 | 0.00 |
| O      |      |    |     |     |        |        |        |      |      |



|        |      |    |     |     |        |        |        |      |      |
|--------|------|----|-----|-----|--------|--------|--------|------|------|
| HETATM | 6188 | H5 | PRP | 392 | 12.176 | 18.343 | 36.571 | 1.00 | 0.00 |
| H      |      |    |     |     |        |        |        |      |      |
| HETATM | 6189 | C3 | PRP | 392 | 13.028 | 19.991 | 37.968 | 1.00 | 0.00 |
| C      |      |    |     |     |        |        |        |      |      |
| HETATM | 6190 | H6 | PRP | 392 | 13.577 | 20.406 | 38.813 | 1.00 | 0.00 |
| H      |      |    |     |     |        |        |        |      |      |
| HETATM | 6191 | H7 | PRP | 392 | 13.658 | 19.841 | 37.092 | 1.00 | 0.00 |
| H      |      |    |     |     |        |        |        |      |      |
| HETATM | 6192 | H8 | PRP | 392 | 12.301 | 20.667 | 37.519 | 1.00 | 0.00 |
| H      |      |    |     |     |        |        |        |      |      |
| HETATM | 6193 | O1 | PRP | 393 | 2.698  | 12.725 | 38.755 | 1.00 | 0.00 |
| O      |      |    |     |     |        |        |        |      |      |
| HETATM | 6194 | H1 | PRP | 393 | 2.926  | 13.144 | 37.922 | 1.00 | 0.00 |
| H      |      |    |     |     |        |        |        |      |      |
| HETATM | 6195 | C1 | PRP | 393 | 1.843  | 11.610 | 38.456 | 1.00 | 0.00 |
| C      |      |    |     |     |        |        |        |      |      |
| HETATM | 6196 | H2 | PRP | 393 | 2.461  | 10.717 | 38.362 | 1.00 | 0.00 |
| H      |      |    |     |     |        |        |        |      |      |
| HETATM | 6197 | H3 | PRP | 393 | 1.216  | 11.335 | 39.304 | 1.00 | 0.00 |
| H      |      |    |     |     |        |        |        |      |      |
| HETATM | 6198 | C2 | PRP | 393 | 0.994  | 11.709 | 37.210 | 1.00 | 0.00 |
| C      |      |    |     |     |        |        |        |      |      |
| HETATM | 6199 | H4 | PRP | 393 | 1.570  | 11.649 | 36.287 | 1.00 | 0.00 |
| H      |      |    |     |     |        |        |        |      |      |
| HETATM | 6200 | O2 | PRP | 393 | 0.295  | 12.940 | 37.198 | 1.00 | 0.00 |
| O      |      |    |     |     |        |        |        |      |      |
| HETATM | 6201 | H5 | PRP | 393 | -0.169 | 13.021 | 38.035 | 1.00 | 0.00 |
| H      |      |    |     |     |        |        |        |      |      |
| HETATM | 6202 | C3 | PRP | 393 | 0.008  | 10.515 | 37.222 | 1.00 | 0.00 |
| C      |      |    |     |     |        |        |        |      |      |
| HETATM | 6203 | H6 | PRP | 393 | -0.086 | 9.988  | 38.172 | 1.00 | 0.00 |
| H      |      |    |     |     |        |        |        |      |      |
| HETATM | 6204 | H7 | PRP | 393 | -0.981 | 10.822 | 36.883 | 1.00 | 0.00 |
| H      |      |    |     |     |        |        |        |      |      |
| HETATM | 6205 | H8 | PRP | 393 | 0.469  | 9.784  | 36.558 | 1.00 | 0.00 |
| H      |      |    |     |     |        |        |        |      |      |
| HETATM | 6206 | O1 | PRP | 394 | 9.836  | 19.872 | 33.529 | 1.00 | 0.00 |
| O      |      |    |     |     |        |        |        |      |      |
| HETATM | 6207 | H1 | PRP | 394 | 9.721  | 20.779 | 33.821 | 1.00 | 0.00 |
| H      |      |    |     |     |        |        |        |      |      |
| HETATM | 6208 | C1 | PRP | 394 | 9.225  | 19.133 | 34.505 | 1.00 | 0.00 |
| C      |      |    |     |     |        |        |        |      |      |
| HETATM | 6209 | H2 | PRP | 394 | 9.456  | 18.072 | 34.407 | 1.00 | 0.00 |
| H      |      |    |     |     |        |        |        |      |      |
| HETATM | 6210 | H3 | PRP | 394 | 9.580  | 19.512 | 35.464 | 1.00 | 0.00 |
| H      |      |    |     |     |        |        |        |      |      |
| HETATM | 6211 | C2 | PRP | 394 | 7.705  | 19.439 | 34.495 | 1.00 | 0.00 |
| C      |      |    |     |     |        |        |        |      |      |
| HETATM | 6212 | H4 | PRP | 394 | 7.312  | 19.261 | 35.496 | 1.00 | 0.00 |
| H      |      |    |     |     |        |        |        |      |      |
| HETATM | 6213 | O2 | PRP | 394 | 6.944  | 18.608 | 33.636 | 1.00 | 0.00 |
| O      |      |    |     |     |        |        |        |      |      |
| HETATM | 6214 | H5 | PRP | 394 | 7.153  | 18.752 | 32.710 | 1.00 | 0.00 |
| H      |      |    |     |     |        |        |        |      |      |
| HETATM | 6215 | C3 | PRP | 394 | 7.284  | 20.970 | 34.294 | 1.00 | 0.00 |
| C      |      |    |     |     |        |        |        |      |      |

|        |      |    |     |     |        |        |        |      |      |
|--------|------|----|-----|-----|--------|--------|--------|------|------|
| HETATM | 6216 | H6 | PRP | 394 | 6.207  | 21.137 | 34.329 | 1.00 | 0.00 |
| H      |      |    |     |     |        |        |        |      |      |
| HETATM | 6217 | H7 | PRP | 394 | 7.730  | 21.545 | 35.105 | 1.00 | 0.00 |
| H      |      |    |     |     |        |        |        |      |      |
| HETATM | 6218 | H8 | PRP | 394 | 7.584  | 21.286 | 33.295 | 1.00 | 0.00 |
| H      |      |    |     |     |        |        |        |      |      |
| HETATM | 6219 | O1 | PRP | 395 | 14.272 | -7.417 | 32.265 | 1.00 | 0.00 |
| O      |      |    |     |     |        |        |        |      |      |
| HETATM | 6220 | H1 | PRP | 395 | 14.417 | -7.799 | 33.134 | 1.00 | 0.00 |
| H      |      |    |     |     |        |        |        |      |      |
| HETATM | 6221 | C1 | PRP | 395 | 15.110 | -6.311 | 31.898 | 1.00 | 0.00 |
| C      |      |    |     |     |        |        |        |      |      |
| HETATM | 6222 | H2 | PRP | 395 | 16.119 | -6.570 | 32.216 | 1.00 | 0.00 |
| H      |      |    |     |     |        |        |        |      |      |
| HETATM | 6223 | H3 | PRP | 395 | 15.030 | -6.279 | 30.811 | 1.00 | 0.00 |
| H      |      |    |     |     |        |        |        |      |      |
| HETATM | 6224 | C2 | PRP | 395 | 14.675 | -4.915 | 32.459 | 1.00 | 0.00 |
| C      |      |    |     |     |        |        |        |      |      |
| HETATM | 6225 | H4 | PRP | 395 | 14.476 | -5.102 | 33.514 | 1.00 | 0.00 |
| H      |      |    |     |     |        |        |        |      |      |
| HETATM | 6226 | O2 | PRP | 395 | 13.465 | -4.357 | 31.921 | 1.00 | 0.00 |
| O      |      |    |     |     |        |        |        |      |      |
| HETATM | 6227 | H5 | PRP | 395 | 12.704 | -4.837 | 32.256 | 1.00 | 0.00 |
| H      |      |    |     |     |        |        |        |      |      |
| HETATM | 6228 | C3 | PRP | 395 | 15.825 | -3.969 | 32.152 | 1.00 | 0.00 |
| C      |      |    |     |     |        |        |        |      |      |
| HETATM | 6229 | H6 | PRP | 395 | 15.857 | -3.146 | 32.866 | 1.00 | 0.00 |
| H      |      |    |     |     |        |        |        |      |      |
| HETATM | 6230 | H7 | PRP | 395 | 16.785 | -4.485 | 32.168 | 1.00 | 0.00 |
| H      |      |    |     |     |        |        |        |      |      |
| HETATM | 6231 | H8 | PRP | 395 | 15.542 | -3.659 | 31.146 | 1.00 | 0.00 |
| H      |      |    |     |     |        |        |        |      |      |
| HETATM | 6232 | O1 | PRP | 396 | 19.169 | 24.479 | 36.667 | 1.00 | 0.00 |
| O      |      |    |     |     |        |        |        |      |      |
| HETATM | 6233 | H1 | PRP | 396 | 20.046 | 24.303 | 37.014 | 1.00 | 0.00 |
| H      |      |    |     |     |        |        |        |      |      |
| HETATM | 6234 | C1 | PRP | 396 | 18.176 | 24.236 | 37.737 | 1.00 | 0.00 |
| C      |      |    |     |     |        |        |        |      |      |
| HETATM | 6235 | H2 | PRP | 396 | 17.261 | 23.759 | 37.386 | 1.00 | 0.00 |
| H      |      |    |     |     |        |        |        |      |      |
| HETATM | 6236 | H3 | PRP | 396 | 18.707 | 23.655 | 38.491 | 1.00 | 0.00 |
| H      |      |    |     |     |        |        |        |      |      |
| HETATM | 6237 | C2 | PRP | 396 | 17.711 | 25.558 | 38.292 | 1.00 | 0.00 |
| C      |      |    |     |     |        |        |        |      |      |
| HETATM | 6238 | H4 | PRP | 396 | 16.876 | 25.307 | 38.946 | 1.00 | 0.00 |
| H      |      |    |     |     |        |        |        |      |      |
| HETATM | 6239 | O2 | PRP | 396 | 17.312 | 26.436 | 37.251 | 1.00 | 0.00 |
| O      |      |    |     |     |        |        |        |      |      |
| HETATM | 6240 | H5 | PRP | 396 | 17.983 | 26.266 | 36.586 | 1.00 | 0.00 |
| H      |      |    |     |     |        |        |        |      |      |
| HETATM | 6241 | C3 | PRP | 396 | 18.751 | 26.179 | 39.136 | 1.00 | 0.00 |
| C      |      |    |     |     |        |        |        |      |      |
| HETATM | 6242 | H6 | PRP | 396 | 19.769 | 25.928 | 38.839 | 1.00 | 0.00 |
| H      |      |    |     |     |        |        |        |      |      |
| HETATM | 6243 | H7 | PRP | 396 | 18.626 | 27.260 | 39.071 | 1.00 | 0.00 |
| H      |      |    |     |     |        |        |        |      |      |

|        |      |    |     |     |        |        |        |      |      |
|--------|------|----|-----|-----|--------|--------|--------|------|------|
| HETATM | 6244 | H8 | PRP | 396 | 18.630 | 25.717 | 40.116 | 1.00 | 0.00 |
| H      |      |    |     |     |        |        |        |      |      |
| HETATM | 6245 | O1 | PRP | 397 | 13.133 | 25.338 | 41.988 | 1.00 | 0.00 |
| O      |      |    |     |     |        |        |        |      |      |
| HETATM | 6246 | H1 | PRP | 397 | 13.565 | 24.676 | 42.533 | 1.00 | 0.00 |
| H      |      |    |     |     |        |        |        |      |      |
| HETATM | 6247 | C1 | PRP | 397 | 12.095 | 24.678 | 41.369 | 1.00 | 0.00 |
| C      |      |    |     |     |        |        |        |      |      |
| HETATM | 6248 | H2 | PRP | 397 | 11.620 | 24.080 | 42.147 | 1.00 | 0.00 |
| H      |      |    |     |     |        |        |        |      |      |
| HETATM | 6249 | H3 | PRP | 397 | 11.402 | 25.382 | 40.909 | 1.00 | 0.00 |
| H      |      |    |     |     |        |        |        |      |      |
| HETATM | 6250 | C2 | PRP | 397 | 12.565 | 23.630 | 40.374 | 1.00 | 0.00 |
| C      |      |    |     |     |        |        |        |      |      |
| HETATM | 6251 | H4 | PRP | 397 | 11.849 | 23.464 | 39.569 | 1.00 | 0.00 |
| H      |      |    |     |     |        |        |        |      |      |
| HETATM | 6252 | O2 | PRP | 397 | 12.751 | 22.403 | 41.028 | 1.00 | 0.00 |
| O      |      |    |     |     |        |        |        |      |      |
| HETATM | 6253 | H5 | PRP | 397 | 11.938 | 21.920 | 41.193 | 1.00 | 0.00 |
| H      |      |    |     |     |        |        |        |      |      |
| HETATM | 6254 | C3 | PRP | 397 | 13.973 | 23.931 | 39.748 | 1.00 | 0.00 |
| C      |      |    |     |     |        |        |        |      |      |
| HETATM | 6255 | H6 | PRP | 397 | 14.678 | 23.946 | 40.579 | 1.00 | 0.00 |
| H      |      |    |     |     |        |        |        |      |      |
| HETATM | 6256 | H7 | PRP | 397 | 14.128 | 23.149 | 39.005 | 1.00 | 0.00 |
| H      |      |    |     |     |        |        |        |      |      |
| HETATM | 6257 | H8 | PRP | 397 | 13.908 | 24.792 | 39.081 | 1.00 | 0.00 |
| H      |      |    |     |     |        |        |        |      |      |
| HETATM | 6258 | O1 | PRP | 398 | 13.067 | 3.071  | 36.665 | 1.00 | 0.00 |
| O      |      |    |     |     |        |        |        |      |      |
| HETATM | 6259 | H1 | PRP | 398 | 12.934 | 2.365  | 37.302 | 1.00 | 0.00 |
| H      |      |    |     |     |        |        |        |      |      |
| HETATM | 6260 | C1 | PRP | 398 | 11.844 | 3.872  | 36.673 | 1.00 | 0.00 |
| C      |      |    |     |     |        |        |        |      |      |
| HETATM | 6261 | H2 | PRP | 398 | 11.015 | 3.207  | 36.431 | 1.00 | 0.00 |
| H      |      |    |     |     |        |        |        |      |      |
| HETATM | 6262 | H3 | PRP | 398 | 11.755 | 4.173  | 37.717 | 1.00 | 0.00 |
| H      |      |    |     |     |        |        |        |      |      |
| HETATM | 6263 | C2 | PRP | 398 | 12.065 | 4.983  | 35.619 | 1.00 | 0.00 |
| C      |      |    |     |     |        |        |        |      |      |
| HETATM | 6264 | H4 | PRP | 398 | 12.275 | 4.527  | 34.651 | 1.00 | 0.00 |
| H      |      |    |     |     |        |        |        |      |      |
| HETATM | 6265 | O2 | PRP | 398 | 13.049 | 5.828  | 36.145 | 1.00 | 0.00 |
| O      |      |    |     |     |        |        |        |      |      |
| HETATM | 6266 | H5 | PRP | 398 | 13.864 | 5.330  | 36.234 | 1.00 | 0.00 |
| H      |      |    |     |     |        |        |        |      |      |
| HETATM | 6267 | C3 | PRP | 398 | 10.761 | 5.668  | 35.489 | 1.00 | 0.00 |
| C      |      |    |     |     |        |        |        |      |      |
| HETATM | 6268 | H6 | PRP | 398 | 10.518 | 6.070  | 36.472 | 1.00 | 0.00 |
| H      |      |    |     |     |        |        |        |      |      |
| HETATM | 6269 | H7 | PRP | 398 | 10.868 | 6.539  | 34.842 | 1.00 | 0.00 |
| H      |      |    |     |     |        |        |        |      |      |
| HETATM | 6270 | H8 | PRP | 398 | 9.941  | 4.988  | 35.258 | 1.00 | 0.00 |
| H      |      |    |     |     |        |        |        |      |      |
| HETATM | 6271 | O1 | PRP | 399 | 4.427  | -6.337 | 26.159 | 1.00 | 0.00 |
| O      |      |    |     |     |        |        |        |      |      |

|        |      |    |     |     |        |        |        |      |      |
|--------|------|----|-----|-----|--------|--------|--------|------|------|
| HETATM | 6272 | H1 | PRP | 399 | 5.237  | -6.195 | 25.664 | 1.00 | 0.00 |
| H      |      |    |     |     |        |        |        |      |      |
| HETATM | 6273 | C1 | PRP | 399 | 4.563  | -5.345 | 27.116 | 1.00 | 0.00 |
| C      |      |    |     |     |        |        |        |      |      |
| HETATM | 6274 | H2 | PRP | 399 | 5.436  | -5.606 | 27.714 | 1.00 | 0.00 |
| H      |      |    |     |     |        |        |        |      |      |
| HETATM | 6275 | H3 | PRP | 399 | 4.834  | -4.405 | 26.636 | 1.00 | 0.00 |
| H      |      |    |     |     |        |        |        |      |      |
| HETATM | 6276 | C2 | PRP | 399 | 3.357  | -5.207 | 28.027 | 1.00 | 0.00 |
| C      |      |    |     |     |        |        |        |      |      |
| HETATM | 6277 | H4 | PRP | 399 | 2.910  | -6.198 | 28.115 | 1.00 | 0.00 |
| H      |      |    |     |     |        |        |        |      |      |
| HETATM | 6278 | O2 | PRP | 399 | 2.338  | -4.454 | 27.232 | 1.00 | 0.00 |
| O      |      |    |     |     |        |        |        |      |      |
| HETATM | 6279 | H5 | PRP | 399 | 2.232  | -4.831 | 26.355 | 1.00 | 0.00 |
| H      |      |    |     |     |        |        |        |      |      |
| HETATM | 6280 | C3 | PRP | 399 | 3.698  | -4.487 | 29.379 | 1.00 | 0.00 |
| C      |      |    |     |     |        |        |        |      |      |
| HETATM | 6281 | H6 | PRP | 399 | 2.818  | -4.393 | 30.015 | 1.00 | 0.00 |
| H      |      |    |     |     |        |        |        |      |      |
| HETATM | 6282 | H7 | PRP | 399 | 4.436  | -5.111 | 29.883 | 1.00 | 0.00 |
| H      |      |    |     |     |        |        |        |      |      |
| HETATM | 6283 | H8 | PRP | 399 | 4.191  | -3.519 | 29.288 | 1.00 | 0.00 |
| H      |      |    |     |     |        |        |        |      |      |
| HETATM | 6284 | O1 | PRP | 400 | 15.829 | 7.804  | 28.815 | 1.00 | 0.00 |
| O      |      |    |     |     |        |        |        |      |      |
| HETATM | 6285 | H1 | PRP | 400 | 16.619 | 8.181  | 28.422 | 1.00 | 0.00 |
| H      |      |    |     |     |        |        |        |      |      |
| HETATM | 6286 | C1 | PRP | 400 | 14.988 | 7.378  | 27.848 | 1.00 | 0.00 |
| C      |      |    |     |     |        |        |        |      |      |
| HETATM | 6287 | H2 | PRP | 400 | 14.350 | 6.599  | 28.265 | 1.00 | 0.00 |
| H      |      |    |     |     |        |        |        |      |      |
| HETATM | 6288 | H3 | PRP | 400 | 14.529 | 8.256  | 27.394 | 1.00 | 0.00 |
| H      |      |    |     |     |        |        |        |      |      |
| HETATM | 6289 | C2 | PRP | 400 | 15.813 | 6.656  | 26.715 | 1.00 | 0.00 |
| C      |      |    |     |     |        |        |        |      |      |
| HETATM | 6290 | H4 | PRP | 400 | 16.143 | 5.735  | 27.195 | 1.00 | 0.00 |
| H      |      |    |     |     |        |        |        |      |      |
| HETATM | 6291 | O2 | PRP | 400 | 16.897 | 7.421  | 26.261 | 1.00 | 0.00 |
| O      |      |    |     |     |        |        |        |      |      |
| HETATM | 6292 | H5 | PRP | 400 | 17.160 | 7.074  | 25.405 | 1.00 | 0.00 |
| H      |      |    |     |     |        |        |        |      |      |
| HETATM | 6293 | C3 | PRP | 400 | 14.831 | 6.441  | 25.580 | 1.00 | 0.00 |
| C      |      |    |     |     |        |        |        |      |      |
| HETATM | 6294 | H6 | PRP | 400 | 14.456 | 7.390  | 25.197 | 1.00 | 0.00 |
| H      |      |    |     |     |        |        |        |      |      |
| HETATM | 6295 | H7 | PRP | 400 | 15.361 | 5.985  | 24.744 | 1.00 | 0.00 |
| H      |      |    |     |     |        |        |        |      |      |
| HETATM | 6296 | H8 | PRP | 400 | 14.000 | 5.823  | 25.918 | 1.00 | 0.00 |
| H      |      |    |     |     |        |        |        |      |      |
| HETATM | 6297 | O1 | PRP | 401 | 18.598 | 3.218  | 29.901 | 1.00 | 0.00 |
| O      |      |    |     |     |        |        |        |      |      |
| HETATM | 6298 | H1 | PRP | 401 | 19.243 | 3.922  | 29.996 | 1.00 | 0.00 |
| H      |      |    |     |     |        |        |        |      |      |
| HETATM | 6299 | C1 | PRP | 401 | 17.868 | 3.590  | 28.672 | 1.00 | 0.00 |
| C      |      |    |     |     |        |        |        |      |      |

|        |      |    |     |     |        |        |        |      |      |
|--------|------|----|-----|-----|--------|--------|--------|------|------|
| HETATM | 6300 | H2 | PRP | 401 | 16.809 | 3.787  | 28.842 | 1.00 | 0.00 |
| H      |      |    |     |     |        |        |        |      |      |
| HETATM | 6301 | H3 | PRP | 401 | 18.345 | 4.545  | 28.453 | 1.00 | 0.00 |
| H      |      |    |     |     |        |        |        |      |      |
| HETATM | 6302 | C2 | PRP | 401 | 18.026 | 2.578  | 27.515 | 1.00 | 0.00 |
| C      |      |    |     |     |        |        |        |      |      |
| HETATM | 6303 | H4 | PRP | 401 | 17.559 | 1.623  | 27.757 | 1.00 | 0.00 |
| H      |      |    |     |     |        |        |        |      |      |
| HETATM | 6304 | O2 | PRP | 401 | 19.421 | 2.480  | 27.306 | 1.00 | 0.00 |
| O      |      |    |     |     |        |        |        |      |      |
| HETATM | 6305 | H5 | PRP | 401 | 19.919 | 2.340  | 28.114 | 1.00 | 0.00 |
| H      |      |    |     |     |        |        |        |      |      |
| HETATM | 6306 | C3 | PRP | 401 | 17.266 | 3.213  | 26.346 | 1.00 | 0.00 |
| C      |      |    |     |     |        |        |        |      |      |
| HETATM | 6307 | H6 | PRP | 401 | 16.190 | 3.040  | 26.357 | 1.00 | 0.00 |
| H      |      |    |     |     |        |        |        |      |      |
| HETATM | 6308 | H7 | PRP | 401 | 17.692 | 4.208  | 26.216 | 1.00 | 0.00 |
| H      |      |    |     |     |        |        |        |      |      |
| HETATM | 6309 | H8 | PRP | 401 | 17.667 | 2.653  | 25.500 | 1.00 | 0.00 |
| H      |      |    |     |     |        |        |        |      |      |
| HETATM | 6310 | O1 | PRP | 402 | 14.385 | -7.882 | 28.817 | 1.00 | 0.00 |
| O      |      |    |     |     |        |        |        |      |      |
| HETATM | 6311 | H1 | PRP | 402 | 15.185 | -7.359 | 28.905 | 1.00 | 0.00 |
| H      |      |    |     |     |        |        |        |      |      |
| HETATM | 6312 | C1 | PRP | 402 | 13.335 | -6.930 | 28.924 | 1.00 | 0.00 |
| C      |      |    |     |     |        |        |        |      |      |
| HETATM | 6313 | H2 | PRP | 402 | 12.471 | -7.504 | 28.590 | 1.00 | 0.00 |
| H      |      |    |     |     |        |        |        |      |      |
| HETATM | 6314 | H3 | PRP | 402 | 13.273 | -6.549 | 29.944 | 1.00 | 0.00 |
| H      |      |    |     |     |        |        |        |      |      |
| HETATM | 6315 | C2 | PRP | 402 | 13.637 | -5.838 | 27.852 | 1.00 | 0.00 |
| C      |      |    |     |     |        |        |        |      |      |
| HETATM | 6316 | H4 | PRP | 402 | 14.086 | -6.266 | 26.956 | 1.00 | 0.00 |
| H      |      |    |     |     |        |        |        |      |      |
| HETATM | 6317 | O2 | PRP | 402 | 14.630 | -5.010 | 28.428 | 1.00 | 0.00 |
| O      |      |    |     |     |        |        |        |      |      |
| HETATM | 6318 | H5 | PRP | 402 | 15.507 | -5.400 | 28.435 | 1.00 | 0.00 |
| H      |      |    |     |     |        |        |        |      |      |
| HETATM | 6319 | C3 | PRP | 402 | 12.292 | -5.210 | 27.419 | 1.00 | 0.00 |
| C      |      |    |     |     |        |        |        |      |      |
| HETATM | 6320 | H6 | PRP | 402 | 11.653 | -5.062 | 28.290 | 1.00 | 0.00 |
| H      |      |    |     |     |        |        |        |      |      |
| HETATM | 6321 | H7 | PRP | 402 | 12.434 | -4.258 | 26.907 | 1.00 | 0.00 |
| H      |      |    |     |     |        |        |        |      |      |
| HETATM | 6322 | H8 | PRP | 402 | 11.787 | -5.932 | 26.777 | 1.00 | 0.00 |
| H      |      |    |     |     |        |        |        |      |      |
| HETATM | 6323 | O1 | PRP | 403 | 10.077 | -0.917 | 28.303 | 1.00 | 0.00 |
| O      |      |    |     |     |        |        |        |      |      |
| HETATM | 6324 | H1 | PRP | 403 | 10.543 | -1.100 | 27.484 | 1.00 | 0.00 |
| H      |      |    |     |     |        |        |        |      |      |
| HETATM | 6325 | C1 | PRP | 403 | 9.697  | -2.156 | 28.877 | 1.00 | 0.00 |
| C      |      |    |     |     |        |        |        |      |      |
| HETATM | 6326 | H2 | PRP | 403 | 8.749  | -2.531 | 28.488 | 1.00 | 0.00 |
| H      |      |    |     |     |        |        |        |      |      |
| HETATM | 6327 | H3 | PRP | 403 | 10.484 | -2.909 | 28.901 | 1.00 | 0.00 |
| H      |      |    |     |     |        |        |        |      |      |

|        |      |    |     |     |        |        |        |      |      |
|--------|------|----|-----|-----|--------|--------|--------|------|------|
| HETATM | 6328 | C2 | PRP | 403 | 9.266  | -1.919 | 30.370 | 1.00 | 0.00 |
| C      |      |    |     |     |        |        |        |      |      |
| HETATM | 6329 | H4 | PRP | 403 | 9.195  | -0.836 | 30.469 | 1.00 | 0.00 |
| H      |      |    |     |     |        |        |        |      |      |
| HETATM | 6330 | O2 | PRP | 403 | 10.309 | -2.244 | 31.276 | 1.00 | 0.00 |
| O      |      |    |     |     |        |        |        |      |      |
| HETATM | 6331 | H5 | PRP | 403 | 11.139 | -2.034 | 30.843 | 1.00 | 0.00 |
| H      |      |    |     |     |        |        |        |      |      |
| HETATM | 6332 | C3 | PRP | 403 | 7.911  | -2.590 | 30.825 | 1.00 | 0.00 |
| C      |      |    |     |     |        |        |        |      |      |
| HETATM | 6333 | H6 | PRP | 403 | 7.917  | -3.637 | 30.523 | 1.00 | 0.00 |
| H      |      |    |     |     |        |        |        |      |      |
| HETATM | 6334 | H7 | PRP | 403 | 7.829  | -2.541 | 31.911 | 1.00 | 0.00 |
| H      |      |    |     |     |        |        |        |      |      |
| HETATM | 6335 | H8 | PRP | 403 | 6.993  | -2.175 | 30.410 | 1.00 | 0.00 |
| H      |      |    |     |     |        |        |        |      |      |
| HETATM | 6336 | O1 | PRP | 404 | 18.796 | -6.291 | 31.065 | 1.00 | 0.00 |
| O      |      |    |     |     |        |        |        |      |      |
| HETATM | 6337 | H1 | PRP | 404 | 19.587 | -5.777 | 30.883 | 1.00 | 0.00 |
| H      |      |    |     |     |        |        |        |      |      |
| HETATM | 6338 | C1 | PRP | 404 | 18.757 | -7.429 | 30.260 | 1.00 | 0.00 |
| C      |      |    |     |     |        |        |        |      |      |
| HETATM | 6339 | H2 | PRP | 404 | 19.700 | -7.976 | 30.285 | 1.00 | 0.00 |
| H      |      |    |     |     |        |        |        |      |      |
| HETATM | 6340 | H3 | PRP | 404 | 17.962 | -8.080 | 30.623 | 1.00 | 0.00 |
| H      |      |    |     |     |        |        |        |      |      |
| HETATM | 6341 | C2 | PRP | 404 | 18.583 | -6.991 | 28.849 | 1.00 | 0.00 |
| C      |      |    |     |     |        |        |        |      |      |
| HETATM | 6342 | H4 | PRP | 404 | 19.396 | -6.439 | 28.378 | 1.00 | 0.00 |
| H      |      |    |     |     |        |        |        |      |      |
| HETATM | 6343 | O2 | PRP | 404 | 17.376 | -6.182 | 28.702 | 1.00 | 0.00 |
| O      |      |    |     |     |        |        |        |      |      |
| HETATM | 6344 | H5 | PRP | 404 | 17.509 | -5.368 | 29.194 | 1.00 | 0.00 |
| H      |      |    |     |     |        |        |        |      |      |
| HETATM | 6345 | C3 | PRP | 404 | 18.486 | -8.266 | 28.004 | 1.00 | 0.00 |
| C      |      |    |     |     |        |        |        |      |      |
| HETATM | 6346 | H6 | PRP | 404 | 19.488 | -8.693 | 27.980 | 1.00 | 0.00 |
| H      |      |    |     |     |        |        |        |      |      |
| HETATM | 6347 | H7 | PRP | 404 | 17.809 | -8.931 | 28.539 | 1.00 | 0.00 |
| H      |      |    |     |     |        |        |        |      |      |
| HETATM | 6348 | H8 | PRP | 404 | 18.139 | -8.018 | 27.000 | 1.00 | 0.00 |
| H      |      |    |     |     |        |        |        |      |      |
| HETATM | 6349 | O1 | PRP | 405 | 21.650 | -6.235 | 26.562 | 1.00 | 0.00 |
| O      |      |    |     |     |        |        |        |      |      |
| HETATM | 6350 | H1 | PRP | 405 | 22.541 | -6.220 | 26.206 | 1.00 | 0.00 |
| H      |      |    |     |     |        |        |        |      |      |
| HETATM | 6351 | C1 | PRP | 405 | 20.720 | -6.700 | 25.588 | 1.00 | 0.00 |
| C      |      |    |     |     |        |        |        |      |      |
| HETATM | 6352 | H2 | PRP | 405 | 21.203 | -7.611 | 25.235 | 1.00 | 0.00 |
| H      |      |    |     |     |        |        |        |      |      |
| HETATM | 6353 | H3 | PRP | 405 | 19.682 | -6.887 | 25.865 | 1.00 | 0.00 |
| H      |      |    |     |     |        |        |        |      |      |
| HETATM | 6354 | C2 | PRP | 405 | 20.711 | -5.908 | 24.233 | 1.00 | 0.00 |
| C      |      |    |     |     |        |        |        |      |      |
| HETATM | 6355 | H4 | PRP | 405 | 19.908 | -6.428 | 23.711 | 1.00 | 0.00 |
| H      |      |    |     |     |        |        |        |      |      |

|        |      |    |     |     |        |         |        |      |      |
|--------|------|----|-----|-----|--------|---------|--------|------|------|
| HETATM | 6356 | O2 | PRP | 405 | 21.935 | -6.115  | 23.588 | 1.00 | 0.00 |
| O      |      |    |     |     |        |         |        |      |      |
| HETATM | 6357 | H5 | PRP | 405 | 22.661 | -5.830  | 24.147 | 1.00 | 0.00 |
| H      |      |    |     |     |        |         |        |      |      |
| HETATM | 6358 | C3 | PRP | 405 | 20.211 | -4.460  | 24.380 | 1.00 | 0.00 |
| C      |      |    |     |     |        |         |        |      |      |
| HETATM | 6359 | H6 | PRP | 405 | 20.028 | -4.031  | 23.395 | 1.00 | 0.00 |
| H      |      |    |     |     |        |         |        |      |      |
| HETATM | 6360 | H7 | PRP | 405 | 19.265 | -4.552  | 24.915 | 1.00 | 0.00 |
| H      |      |    |     |     |        |         |        |      |      |
| HETATM | 6361 | H8 | PRP | 405 | 20.952 | -3.907  | 24.957 | 1.00 | 0.00 |
| H      |      |    |     |     |        |         |        |      |      |
| HETATM | 6362 | O1 | PRP | 406 | 13.337 | -10.472 | 24.400 | 1.00 | 0.00 |
| O      |      |    |     |     |        |         |        |      |      |
| HETATM | 6363 | H1 | PRP | 406 | 12.675 | -10.346 | 23.717 | 1.00 | 0.00 |
| H      |      |    |     |     |        |         |        |      |      |
| HETATM | 6364 | C1 | PRP | 406 | 12.604 | -10.628 | 25.617 | 1.00 | 0.00 |
| C      |      |    |     |     |        |         |        |      |      |
| HETATM | 6365 | H2 | PRP | 406 | 12.408 | -11.691 | 25.762 | 1.00 | 0.00 |
| H      |      |    |     |     |        |         |        |      |      |
| HETATM | 6366 | H3 | PRP | 406 | 13.206 | -10.307 | 26.467 | 1.00 | 0.00 |
| H      |      |    |     |     |        |         |        |      |      |
| HETATM | 6367 | C2 | PRP | 406 | 11.336 | -9.723  | 25.428 | 1.00 | 0.00 |
| C      |      |    |     |     |        |         |        |      |      |
| HETATM | 6368 | H4 | PRP | 406 | 10.721 | -9.607  | 26.320 | 1.00 | 0.00 |
| H      |      |    |     |     |        |         |        |      |      |
| HETATM | 6369 | O2 | PRP | 406 | 10.400 | -10.148 | 24.457 | 1.00 | 0.00 |
| O      |      |    |     |     |        |         |        |      |      |
| HETATM | 6370 | H5 | PRP | 406 | 9.534  | -10.157 | 24.872 | 1.00 | 0.00 |
| H      |      |    |     |     |        |         |        |      |      |
| HETATM | 6371 | C3 | PRP | 406 | 11.754 | -8.282  | 25.121 | 1.00 | 0.00 |
| C      |      |    |     |     |        |         |        |      |      |
| HETATM | 6372 | H6 | PRP | 406 | 12.085 | -8.177  | 24.088 | 1.00 | 0.00 |
| H      |      |    |     |     |        |         |        |      |      |
| HETATM | 6373 | H7 | PRP | 406 | 10.937 | -7.634  | 25.439 | 1.00 | 0.00 |
| H      |      |    |     |     |        |         |        |      |      |
| HETATM | 6374 | H8 | PRP | 406 | 12.568 | -7.921  | 25.750 | 1.00 | 0.00 |
| H      |      |    |     |     |        |         |        |      |      |
| HETATM | 6375 | O1 | PRP | 407 | 11.604 | -11.808 | 13.410 | 1.00 | 0.00 |
| O      |      |    |     |     |        |         |        |      |      |
| HETATM | 6376 | H1 | PRP | 407 | 11.402 | -12.152 | 12.536 | 1.00 | 0.00 |
| H      |      |    |     |     |        |         |        |      |      |
| HETATM | 6377 | C1 | PRP | 407 | 10.651 | -12.149 | 14.354 | 1.00 | 0.00 |
| C      |      |    |     |     |        |         |        |      |      |
| HETATM | 6378 | H2 | PRP | 407 | 9.646  | -12.052 | 13.943 | 1.00 | 0.00 |
| H      |      |    |     |     |        |         |        |      |      |
| HETATM | 6379 | H3 | PRP | 407 | 10.577 | -13.196 | 14.646 | 1.00 | 0.00 |
| H      |      |    |     |     |        |         |        |      |      |
| HETATM | 6380 | C2 | PRP | 407 | 10.679 | -11.287 | 15.647 | 1.00 | 0.00 |
| C      |      |    |     |     |        |         |        |      |      |
| HETATM | 6381 | H4 | PRP | 407 | 9.918  | -11.579 | 16.371 | 1.00 | 0.00 |
| H      |      |    |     |     |        |         |        |      |      |
| HETATM | 6382 | O2 | PRP | 407 | 10.740 | -9.891  | 15.357 | 1.00 | 0.00 |
| O      |      |    |     |     |        |         |        |      |      |
| HETATM | 6383 | H5 | PRP | 407 | 11.049 | -9.742  | 14.461 | 1.00 | 0.00 |
| H      |      |    |     |     |        |         |        |      |      |

|        |      |    |     |     |        |         |        |      |      |
|--------|------|----|-----|-----|--------|---------|--------|------|------|
| HETATM | 6384 | C3 | PRP | 407 | 11.965 | -11.473 | 16.421 | 1.00 | 0.00 |
| C      |      |    |     |     |        |         |        |      |      |
| HETATM | 6385 | H6 | PRP | 407 | 12.087 | -12.527 | 16.671 | 1.00 | 0.00 |
| H      |      |    |     |     |        |         |        |      |      |
| HETATM | 6386 | H7 | PRP | 407 | 12.706 | -11.120 | 15.704 | 1.00 | 0.00 |
| H      |      |    |     |     |        |         |        |      |      |
| HETATM | 6387 | H8 | PRP | 407 | 11.908 | -10.830 | 17.299 | 1.00 | 0.00 |
| H      |      |    |     |     |        |         |        |      |      |
| HETATM | 6388 | O1 | PRP | 408 | 12.390 | 2.262   | 22.402 | 1.00 | 0.00 |
| O      |      |    |     |     |        |         |        |      |      |
| HETATM | 6389 | H1 | PRP | 408 | 11.916 | 2.066   | 23.213 | 1.00 | 0.00 |
| H      |      |    |     |     |        |         |        |      |      |
| HETATM | 6390 | C1 | PRP | 408 | 12.001 | 3.547   | 21.894 | 1.00 | 0.00 |
| C      |      |    |     |     |        |         |        |      |      |
| HETATM | 6391 | H2 | PRP | 408 | 12.771 | 4.056   | 21.314 | 1.00 | 0.00 |
| H      |      |    |     |     |        |         |        |      |      |
| HETATM | 6392 | H3 | PRP | 408 | 11.041 | 3.517   | 21.378 | 1.00 | 0.00 |
| H      |      |    |     |     |        |         |        |      |      |
| HETATM | 6393 | C2 | PRP | 408 | 11.783 | 4.346   | 23.227 | 1.00 | 0.00 |
| C      |      |    |     |     |        |         |        |      |      |
| HETATM | 6394 | H4 | PRP | 408 | 12.675 | 4.472   | 23.840 | 1.00 | 0.00 |
| H      |      |    |     |     |        |         |        |      |      |
| HETATM | 6395 | O2 | PRP | 408 | 10.686 | 3.707   | 23.902 | 1.00 | 0.00 |
| O      |      |    |     |     |        |         |        |      |      |
| HETATM | 6396 | H5 | PRP | 408 | 9.898  | 3.767   | 23.357 | 1.00 | 0.00 |
| H      |      |    |     |     |        |         |        |      |      |
| HETATM | 6397 | C3 | PRP | 408 | 11.369 | 5.762   | 22.713 | 1.00 | 0.00 |
| C      |      |    |     |     |        |         |        |      |      |
| HETATM | 6398 | H6 | PRP | 408 | 12.113 | 6.282   | 22.110 | 1.00 | 0.00 |
| H      |      |    |     |     |        |         |        |      |      |
| HETATM | 6399 | H7 | PRP | 408 | 10.516 | 5.539   | 22.072 | 1.00 | 0.00 |
| H      |      |    |     |     |        |         |        |      |      |
| HETATM | 6400 | H8 | PRP | 408 | 11.008 | 6.407   | 23.515 | 1.00 | 0.00 |
| H      |      |    |     |     |        |         |        |      |      |
| HETATM | 6401 | O1 | PRP | 409 | 3.750  | 8.752   | 37.074 | 1.00 | 0.00 |
| O      |      |    |     |     |        |         |        |      |      |
| HETATM | 6402 | H1 | PRP | 409 | 3.829  | 9.433   | 37.746 | 1.00 | 0.00 |
| H      |      |    |     |     |        |         |        |      |      |
| HETATM | 6403 | C1 | PRP | 409 | 4.725  | 9.016   | 36.111 | 1.00 | 0.00 |
| C      |      |    |     |     |        |         |        |      |      |
| HETATM | 6404 | H2 | PRP | 409 | 5.746  | 8.731   | 36.365 | 1.00 | 0.00 |
| H      |      |    |     |     |        |         |        |      |      |
| HETATM | 6405 | H3 | PRP | 409 | 4.391  | 8.477   | 35.225 | 1.00 | 0.00 |
| H      |      |    |     |     |        |         |        |      |      |
| HETATM | 6406 | C2 | PRP | 409 | 4.784  | 10.510  | 35.738 | 1.00 | 0.00 |
| C      |      |    |     |     |        |         |        |      |      |
| HETATM | 6407 | H4 | PRP | 409 | 4.877  | 11.161  | 36.607 | 1.00 | 0.00 |
| H      |      |    |     |     |        |         |        |      |      |
| HETATM | 6408 | O2 | PRP | 409 | 3.578  | 10.851  | 35.116 | 1.00 | 0.00 |
| O      |      |    |     |     |        |         |        |      |      |
| HETATM | 6409 | H5 | PRP | 409 | 3.133  | 10.037  | 34.869 | 1.00 | 0.00 |
| H      |      |    |     |     |        |         |        |      |      |
| HETATM | 6410 | C3 | PRP | 409 | 5.940  | 10.796  | 34.780 | 1.00 | 0.00 |
| C      |      |    |     |     |        |         |        |      |      |
| HETATM | 6411 | H6 | PRP | 409 | 6.068  | 11.844  | 34.506 | 1.00 | 0.00 |
| H      |      |    |     |     |        |         |        |      |      |



|        |      |    |     |     |        |        |        |      |      |
|--------|------|----|-----|-----|--------|--------|--------|------|------|
| HETATM | 6412 | H7 | PRP | 409 | 6.884  | 10.600 | 35.288 | 1.00 | 0.00 |
| H      |      |    |     |     |        |        |        |      |      |
| HETATM | 6413 | H8 | PRP | 409 | 5.949  | 10.091 | 33.949 | 1.00 | 0.00 |
| H      |      |    |     |     |        |        |        |      |      |
| HETATM | 6414 | O1 | PRP | 410 | 14.287 | -6.059 | 37.269 | 1.00 | 0.00 |
| O      |      |    |     |     |        |        |        |      |      |
| HETATM | 6415 | H1 | PRP | 410 | 14.360 | -6.342 | 36.355 | 1.00 | 0.00 |
| H      |      |    |     |     |        |        |        |      |      |
| HETATM | 6416 | C1 | PRP | 410 | 13.370 | -4.965 | 37.253 | 1.00 | 0.00 |
| C      |      |    |     |     |        |        |        |      |      |
| HETATM | 6417 | H2 | PRP | 410 | 13.097 | -4.641 | 38.257 | 1.00 | 0.00 |
| H      |      |    |     |     |        |        |        |      |      |
| HETATM | 6418 | H3 | PRP | 410 | 13.961 | -4.159 | 36.816 | 1.00 | 0.00 |
| H      |      |    |     |     |        |        |        |      |      |
| HETATM | 6419 | C2 | PRP | 410 | 12.129 | -5.229 | 36.419 | 1.00 | 0.00 |
| C      |      |    |     |     |        |        |        |      |      |
| HETATM | 6420 | H4 | PRP | 410 | 11.791 | -6.217 | 36.729 | 1.00 | 0.00 |
| H      |      |    |     |     |        |        |        |      |      |
| HETATM | 6421 | O2 | PRP | 410 | 12.477 | -5.254 | 35.065 | 1.00 | 0.00 |
| O      |      |    |     |     |        |        |        |      |      |
| HETATM | 6422 | H5 | PRP | 410 | 11.742 | -5.033 | 34.488 | 1.00 | 0.00 |
| H      |      |    |     |     |        |        |        |      |      |
| HETATM | 6423 | C3 | PRP | 410 | 11.059 | -4.140 | 36.542 | 1.00 | 0.00 |
| C      |      |    |     |     |        |        |        |      |      |
| HETATM | 6424 | H6 | PRP | 410 | 10.196 | -4.382 | 35.921 | 1.00 | 0.00 |
| H      |      |    |     |     |        |        |        |      |      |
| HETATM | 6425 | H7 | PRP | 410 | 10.755 | -4.036 | 37.583 | 1.00 | 0.00 |
| H      |      |    |     |     |        |        |        |      |      |
| HETATM | 6426 | H8 | PRP | 410 | 11.370 | -3.163 | 36.171 | 1.00 | 0.00 |
| H      |      |    |     |     |        |        |        |      |      |
| HETATM | 6427 | O1 | PRP | 411 | -4.223 | 19.396 | 41.300 | 1.00 | 0.00 |
| O      |      |    |     |     |        |        |        |      |      |
| HETATM | 6428 | H1 | PRP | 411 | -4.805 | 19.330 | 42.060 | 1.00 | 0.00 |
| H      |      |    |     |     |        |        |        |      |      |
| HETATM | 6429 | C1 | PRP | 411 | -3.307 | 20.481 | 41.464 | 1.00 | 0.00 |
| C      |      |    |     |     |        |        |        |      |      |
| HETATM | 6430 | H2 | PRP | 411 | -3.832 | 21.362 | 41.096 | 1.00 | 0.00 |
| H      |      |    |     |     |        |        |        |      |      |
| HETATM | 6431 | H3 | PRP | 411 | -2.987 | 20.579 | 42.501 | 1.00 | 0.00 |
| H      |      |    |     |     |        |        |        |      |      |
| HETATM | 6432 | C2 | PRP | 411 | -2.038 | 20.211 | 40.635 | 1.00 | 0.00 |
| C      |      |    |     |     |        |        |        |      |      |
| HETATM | 6433 | H4 | PRP | 411 | -1.407 | 19.455 | 41.102 | 1.00 | 0.00 |
| H      |      |    |     |     |        |        |        |      |      |
| HETATM | 6434 | O2 | PRP | 411 | -1.256 | 21.393 | 40.608 | 1.00 | 0.00 |
| O      |      |    |     |     |        |        |        |      |      |
| HETATM | 6435 | H5 | PRP | 411 | -0.474 | 21.251 | 41.147 | 1.00 | 0.00 |
| H      |      |    |     |     |        |        |        |      |      |
| HETATM | 6436 | C3 | PRP | 411 | -2.412 | 19.881 | 39.131 | 1.00 | 0.00 |
| C      |      |    |     |     |        |        |        |      |      |
| HETATM | 6437 | H6 | PRP | 411 | -2.022 | 18.894 | 38.885 | 1.00 | 0.00 |
| H      |      |    |     |     |        |        |        |      |      |
| HETATM | 6438 | H7 | PRP | 411 | -3.498 | 19.886 | 39.032 | 1.00 | 0.00 |
| H      |      |    |     |     |        |        |        |      |      |
| HETATM | 6439 | H8 | PRP | 411 | -1.979 | 20.565 | 38.401 | 1.00 | 0.00 |
| H      |      |    |     |     |        |        |        |      |      |

|        |      |    |     |     |        |        |        |      |      |
|--------|------|----|-----|-----|--------|--------|--------|------|------|
| HETATM | 6440 | O1 | PRP | 412 | 3.579  | 13.251 | 36.212 | 1.00 | 0.00 |
| O      |      |    |     |     |        |        |        |      |      |
| HETATM | 6441 | H1 | PRP | 412 | 3.375  | 12.489 | 35.664 | 1.00 | 0.00 |
| H      |      |    |     |     |        |        |        |      |      |
| HETATM | 6442 | C1 | PRP | 412 | 3.899  | 14.378 | 35.390 | 1.00 | 0.00 |
| C      |      |    |     |     |        |        |        |      |      |
| HETATM | 6443 | H2 | PRP | 412 | 4.911  | 14.714 | 35.617 | 1.00 | 0.00 |
| H      |      |    |     |     |        |        |        |      |      |
| HETATM | 6444 | H3 | PRP | 412 | 3.797  | 14.082 | 34.346 | 1.00 | 0.00 |
| H      |      |    |     |     |        |        |        |      |      |
| HETATM | 6445 | C2 | PRP | 412 | 2.940  | 15.482 | 35.792 | 1.00 | 0.00 |
| C      |      |    |     |     |        |        |        |      |      |
| HETATM | 6446 | H4 | PRP | 412 | 2.805  | 15.550 | 36.871 | 1.00 | 0.00 |
| H      |      |    |     |     |        |        |        |      |      |
| HETATM | 6447 | O2 | PRP | 412 | 1.706  | 15.229 | 35.161 | 1.00 | 0.00 |
| O      |      |    |     |     |        |        |        |      |      |
| HETATM | 6448 | H5 | PRP | 412 | 1.347  | 14.361 | 35.361 | 1.00 | 0.00 |
| H      |      |    |     |     |        |        |        |      |      |
| HETATM | 6449 | C3 | PRP | 412 | 3.453  | 16.821 | 35.298 | 1.00 | 0.00 |
| C      |      |    |     |     |        |        |        |      |      |
| HETATM | 6450 | H6 | PRP | 412 | 3.383  | 17.479 | 36.165 | 1.00 | 0.00 |
| H      |      |    |     |     |        |        |        |      |      |
| HETATM | 6451 | H7 | PRP | 412 | 4.469  | 16.890 | 34.912 | 1.00 | 0.00 |
| H      |      |    |     |     |        |        |        |      |      |
| HETATM | 6452 | H8 | PRP | 412 | 2.810  | 17.335 | 34.583 | 1.00 | 0.00 |
| H      |      |    |     |     |        |        |        |      |      |
| HETATM | 6453 | O1 | PRP | 413 | -2.679 | 8.635  | 36.825 | 1.00 | 0.00 |
| O      |      |    |     |     |        |        |        |      |      |
| HETATM | 6454 | H1 | PRP | 413 | -2.877 | 9.162  | 37.602 | 1.00 | 0.00 |
| H      |      |    |     |     |        |        |        |      |      |
| HETATM | 6455 | C1 | PRP | 413 | -3.798 | 8.683  | 36.058 | 1.00 | 0.00 |
| C      |      |    |     |     |        |        |        |      |      |
| HETATM | 6456 | H2 | PRP | 413 | -4.587 | 7.998  | 36.369 | 1.00 | 0.00 |
| H      |      |    |     |     |        |        |        |      |      |
| HETATM | 6457 | H3 | PRP | 413 | -4.179 | 9.702  | 36.125 | 1.00 | 0.00 |
| H      |      |    |     |     |        |        |        |      |      |
| HETATM | 6458 | C2 | PRP | 413 | -3.479 | 8.474  | 34.558 | 1.00 | 0.00 |
| C      |      |    |     |     |        |        |        |      |      |
| HETATM | 6459 | H4 | PRP | 413 | -4.074 | 9.205  | 34.011 | 1.00 | 0.00 |
| H      |      |    |     |     |        |        |        |      |      |
| HETATM | 6460 | O2 | PRP | 413 | -3.813 | 7.156  | 34.115 | 1.00 | 0.00 |
| O      |      |    |     |     |        |        |        |      |      |
| HETATM | 6461 | H5 | PRP | 413 | -4.743 | 7.015  | 34.304 | 1.00 | 0.00 |
| H      |      |    |     |     |        |        |        |      |      |
| HETATM | 6462 | C3 | PRP | 413 | -2.020 | 8.723  | 34.173 | 1.00 | 0.00 |
| C      |      |    |     |     |        |        |        |      |      |
| HETATM | 6463 | H6 | PRP | 413 | -1.381 | 7.848  | 34.288 | 1.00 | 0.00 |
| H      |      |    |     |     |        |        |        |      |      |
| HETATM | 6464 | H7 | PRP | 413 | -1.945 | 8.882  | 33.097 | 1.00 | 0.00 |
| H      |      |    |     |     |        |        |        |      |      |
| HETATM | 6465 | H8 | PRP | 413 | -1.625 | 9.583  | 34.714 | 1.00 | 0.00 |
| H      |      |    |     |     |        |        |        |      |      |
| HETATM | 6466 | O1 | PRP | 414 | -2.914 | -0.398 | 36.464 | 1.00 | 0.00 |
| O      |      |    |     |     |        |        |        |      |      |
| HETATM | 6467 | H1 | PRP | 414 | -3.004 | -0.989 | 37.215 | 1.00 | 0.00 |
| H      |      |    |     |     |        |        |        |      |      |

|        |      |    |     |     |        |        |        |      |      |
|--------|------|----|-----|-----|--------|--------|--------|------|------|
| HETATM | 6468 | C1 | PRP | 414 | -2.585 | 0.908  | 37.014 | 1.00 | 0.00 |
| C      |      |    |     |     |        |        |        |      |      |
| HETATM | 6469 | H2 | PRP | 414 | -3.196 | 1.638  | 36.483 | 1.00 | 0.00 |
| H      |      |    |     |     |        |        |        |      |      |
| HETATM | 6470 | H3 | PRP | 414 | -2.913 | 1.017  | 38.048 | 1.00 | 0.00 |
| H      |      |    |     |     |        |        |        |      |      |
| HETATM | 6471 | C2 | PRP | 414 | -1.127 | 1.206  | 36.915 | 1.00 | 0.00 |
| C      |      |    |     |     |        |        |        |      |      |
| HETATM | 6472 | H4 | PRP | 414 | -0.809 | 0.970  | 35.899 | 1.00 | 0.00 |
| H      |      |    |     |     |        |        |        |      |      |
| HETATM | 6473 | O2 | PRP | 414 | -0.303 | 0.438  | 37.786 | 1.00 | 0.00 |
| O      |      |    |     |     |        |        |        |      |      |
| HETATM | 6474 | H5 | PRP | 414 | -0.405 | -0.489 | 37.561 | 1.00 | 0.00 |
| H      |      |    |     |     |        |        |        |      |      |
| HETATM | 6475 | C3 | PRP | 414 | -0.646 | 2.690  | 36.982 | 1.00 | 0.00 |
| C      |      |    |     |     |        |        |        |      |      |
| HETATM | 6476 | H6 | PRP | 414 | -0.920 | 3.243  | 37.880 | 1.00 | 0.00 |
| H      |      |    |     |     |        |        |        |      |      |
| HETATM | 6477 | H7 | PRP | 414 | 0.426  | 2.766  | 36.798 | 1.00 | 0.00 |
| H      |      |    |     |     |        |        |        |      |      |
| HETATM | 6478 | H8 | PRP | 414 | -1.185 | 3.089  | 36.122 | 1.00 | 0.00 |
| H      |      |    |     |     |        |        |        |      |      |
| HETATM | 6479 | O1 | PRP | 415 | 12.996 | 8.386  | 37.372 | 1.00 | 0.00 |
| O      |      |    |     |     |        |        |        |      |      |
| HETATM | 6480 | H1 | PRP | 415 | 12.890 | 7.567  | 36.882 | 1.00 | 0.00 |
| H      |      |    |     |     |        |        |        |      |      |
| HETATM | 6481 | C1 | PRP | 415 | 13.891 | 9.246  | 36.681 | 1.00 | 0.00 |
| C      |      |    |     |     |        |        |        |      |      |
| HETATM | 6482 | H2 | PRP | 415 | 13.400 | 9.610  | 35.778 | 1.00 | 0.00 |
| H      |      |    |     |     |        |        |        |      |      |
| HETATM | 6483 | H3 | PRP | 415 | 13.993 | 10.102 | 37.348 | 1.00 | 0.00 |
| H      |      |    |     |     |        |        |        |      |      |
| HETATM | 6484 | C2 | PRP | 415 | 15.182 | 8.520  | 36.335 | 1.00 | 0.00 |
| C      |      |    |     |     |        |        |        |      |      |
| HETATM | 6485 | H4 | PRP | 415 | 14.818 | 7.517  | 36.116 | 1.00 | 0.00 |
| H      |      |    |     |     |        |        |        |      |      |
| HETATM | 6486 | O2 | PRP | 415 | 16.058 | 8.468  | 37.484 | 1.00 | 0.00 |
| O      |      |    |     |     |        |        |        |      |      |
| HETATM | 6487 | H5 | PRP | 415 | 16.489 | 9.279  | 37.763 | 1.00 | 0.00 |
| H      |      |    |     |     |        |        |        |      |      |
| HETATM | 6488 | C3 | PRP | 415 | 15.867 | 9.054  | 35.095 | 1.00 | 0.00 |
| C      |      |    |     |     |        |        |        |      |      |
| HETATM | 6489 | H6 | PRP | 415 | 15.871 | 10.144 | 35.081 | 1.00 | 0.00 |
| H      |      |    |     |     |        |        |        |      |      |
| HETATM | 6490 | H7 | PRP | 415 | 16.901 | 8.715  | 35.160 | 1.00 | 0.00 |
| H      |      |    |     |     |        |        |        |      |      |
| HETATM | 6491 | H8 | PRP | 415 | 15.362 | 8.719  | 34.189 | 1.00 | 0.00 |
| H      |      |    |     |     |        |        |        |      |      |
| HETATM | 6492 | O1 | PRP | 416 | -7.883 | 22.237 | 32.049 | 1.00 | 0.00 |
| O      |      |    |     |     |        |        |        |      |      |
| HETATM | 6493 | H1 | PRP | 416 | -7.005 | 22.619 | 31.976 | 1.00 | 0.00 |
| H      |      |    |     |     |        |        |        |      |      |
| HETATM | 6494 | C1 | PRP | 416 | -7.809 | 20.823 | 31.721 | 1.00 | 0.00 |
| C      |      |    |     |     |        |        |        |      |      |
| HETATM | 6495 | H2 | PRP | 416 | -7.004 | 20.372 | 32.302 | 1.00 | 0.00 |
| H      |      |    |     |     |        |        |        |      |      |

|        |      |    |     |     |        |        |        |      |      |
|--------|------|----|-----|-----|--------|--------|--------|------|------|
| HETATM | 6496 | H3 | PRP | 416 | -8.779 | 20.396 | 31.976 | 1.00 | 0.00 |
| H      |      |    |     |     |        |        |        |      |      |
| HETATM | 6497 | C2 | PRP | 416 | -7.462 | 20.502 | 30.264 | 1.00 | 0.00 |
| C      |      |    |     |     |        |        |        |      |      |
| HETATM | 6498 | H4 | PRP | 416 | -7.567 | 19.430 | 30.095 | 1.00 | 0.00 |
| H      |      |    |     |     |        |        |        |      |      |
| HETATM | 6499 | O2 | PRP | 416 | -6.112 | 20.706 | 30.027 | 1.00 | 0.00 |
| O      |      |    |     |     |        |        |        |      |      |
| HETATM | 6500 | H5 | PRP | 416 | -5.811 | 21.523 | 30.432 | 1.00 | 0.00 |
| H      |      |    |     |     |        |        |        |      |      |
| HETATM | 6501 | C3 | PRP | 416 | -8.387 | 21.256 | 29.274 | 1.00 | 0.00 |
| C      |      |    |     |     |        |        |        |      |      |
| HETATM | 6502 | H6 | PRP | 416 | -9.418 | 20.965 | 29.477 | 1.00 | 0.00 |
| H      |      |    |     |     |        |        |        |      |      |
| HETATM | 6503 | H7 | PRP | 416 | -8.305 | 22.305 | 29.557 | 1.00 | 0.00 |
| H      |      |    |     |     |        |        |        |      |      |
| HETATM | 6504 | H8 | PRP | 416 | -8.324 | 21.283 | 28.186 | 1.00 | 0.00 |
| H      |      |    |     |     |        |        |        |      |      |
| HETATM | 6505 | O1 | PRP | 417 | 5.499  | 10.311 | 16.792 | 1.00 | 0.00 |
| O      |      |    |     |     |        |        |        |      |      |
| HETATM | 6506 | H1 | PRP | 417 | 6.438  | 10.508 | 16.778 | 1.00 | 0.00 |
| H      |      |    |     |     |        |        |        |      |      |
| HETATM | 6507 | C1 | PRP | 417 | 5.070  | 9.740  | 17.981 | 1.00 | 0.00 |
| C      |      |    |     |     |        |        |        |      |      |
| HETATM | 6508 | H2 | PRP | 417 | 4.126  | 10.205 | 18.266 | 1.00 | 0.00 |
| H      |      |    |     |     |        |        |        |      |      |
| HETATM | 6509 | H3 | PRP | 417 | 5.143  | 8.670  | 17.787 | 1.00 | 0.00 |
| H      |      |    |     |     |        |        |        |      |      |
| HETATM | 6510 | C2 | PRP | 417 | 6.095  | 10.109 | 19.087 | 1.00 | 0.00 |
| C      |      |    |     |     |        |        |        |      |      |
| HETATM | 6511 | H4 | PRP | 417 | 6.240  | 11.189 | 19.113 | 1.00 | 0.00 |
| H      |      |    |     |     |        |        |        |      |      |
| HETATM | 6512 | O2 | PRP | 417 | 7.413  | 9.447  | 18.963 | 1.00 | 0.00 |
| O      |      |    |     |     |        |        |        |      |      |
| HETATM | 6513 | H5 | PRP | 417 | 7.795  | 9.673  | 18.112 | 1.00 | 0.00 |
| H      |      |    |     |     |        |        |        |      |      |
| HETATM | 6514 | C3 | PRP | 417 | 5.500  | 9.706  | 20.455 | 1.00 | 0.00 |
| C      |      |    |     |     |        |        |        |      |      |
| HETATM | 6515 | H6 | PRP | 417 | 5.051  | 8.716  | 20.538 | 1.00 | 0.00 |
| H      |      |    |     |     |        |        |        |      |      |
| HETATM | 6516 | H7 | PRP | 417 | 6.338  | 9.653  | 21.150 | 1.00 | 0.00 |
| H      |      |    |     |     |        |        |        |      |      |
| HETATM | 6517 | H8 | PRP | 417 | 4.804  | 10.511 | 20.693 | 1.00 | 0.00 |
| H      |      |    |     |     |        |        |        |      |      |
| HETATM | 6518 | O1 | PRP | 418 | -1.108 | 10.646 | 44.461 | 1.00 | 0.00 |
| O      |      |    |     |     |        |        |        |      |      |
| HETATM | 6519 | H1 | PRP | 418 | -0.711 | 11.498 | 44.656 | 1.00 | 0.00 |
| H      |      |    |     |     |        |        |        |      |      |
| HETATM | 6520 | C1 | PRP | 418 | -0.498 | 9.714  | 43.573 | 1.00 | 0.00 |
| C      |      |    |     |     |        |        |        |      |      |
| HETATM | 6521 | H2 | PRP | 418 | 0.556  | 9.722  | 43.851 | 1.00 | 0.00 |
| H      |      |    |     |     |        |        |        |      |      |
| HETATM | 6522 | H3 | PRP | 418 | -1.021 | 8.765  | 43.688 | 1.00 | 0.00 |
| H      |      |    |     |     |        |        |        |      |      |
| HETATM | 6523 | C2 | PRP | 418 | -0.735 | 10.064 | 42.126 | 1.00 | 0.00 |
| C      |      |    |     |     |        |        |        |      |      |

|        |      |    |     |     |        |        |        |      |      |
|--------|------|----|-----|-----|--------|--------|--------|------|------|
| HETATM | 6524 | H4 | PRP | 418 | -0.414 | 11.102 | 42.031 | 1.00 | 0.00 |
| H      |      |    |     |     |        |        |        |      |      |
| HETATM | 6525 | O2 | PRP | 418 | -2.138 | 9.987  | 41.855 | 1.00 | 0.00 |
| O      |      |    |     |     |        |        |        |      |      |
| HETATM | 6526 | H5 | PRP | 418 | -2.411 | 10.537 | 42.593 | 1.00 | 0.00 |
| H      |      |    |     |     |        |        |        |      |      |
| HETATM | 6527 | C3 | PRP | 418 | 0.133  | 9.272  | 41.141 | 1.00 | 0.00 |
| C      |      |    |     |     |        |        |        |      |      |
| HETATM | 6528 | H6 | PRP | 418 | -0.322 | 9.158  | 40.156 | 1.00 | 0.00 |
| H      |      |    |     |     |        |        |        |      |      |
| HETATM | 6529 | H7 | PRP | 418 | 1.065  | 9.820  | 41.004 | 1.00 | 0.00 |
| H      |      |    |     |     |        |        |        |      |      |
| HETATM | 6530 | H8 | PRP | 418 | 0.278  | 8.280  | 41.569 | 1.00 | 0.00 |
| H      |      |    |     |     |        |        |        |      |      |
| HETATM | 6531 | O1 | PRP | 419 | 9.830  | 16.375 | 38.465 | 1.00 | 0.00 |
| O      |      |    |     |     |        |        |        |      |      |
| HETATM | 6532 | H1 | PRP | 419 | 10.248 | 17.198 | 38.202 | 1.00 | 0.00 |
| H      |      |    |     |     |        |        |        |      |      |
| HETATM | 6533 | C1 | PRP | 419 | 8.706  | 16.204 | 37.629 | 1.00 | 0.00 |
| C      |      |    |     |     |        |        |        |      |      |
| HETATM | 6534 | H2 | PRP | 419 | 7.909  | 15.870 | 38.293 | 1.00 | 0.00 |
| H      |      |    |     |     |        |        |        |      |      |
| HETATM | 6535 | H3 | PRP | 419 | 8.338  | 17.145 | 37.221 | 1.00 | 0.00 |
| H      |      |    |     |     |        |        |        |      |      |
| HETATM | 6536 | C2 | PRP | 419 | 9.047  | 15.210 | 36.460 | 1.00 | 0.00 |
| C      |      |    |     |     |        |        |        |      |      |
| HETATM | 6537 | H4 | PRP | 419 | 9.353  | 14.247 | 36.871 | 1.00 | 0.00 |
| H      |      |    |     |     |        |        |        |      |      |
| HETATM | 6538 | O2 | PRP | 419 | 10.092 | 15.837 | 35.683 | 1.00 | 0.00 |
| O      |      |    |     |     |        |        |        |      |      |
| HETATM | 6539 | H5 | PRP | 419 | 10.937 | 15.740 | 36.127 | 1.00 | 0.00 |
| H      |      |    |     |     |        |        |        |      |      |
| HETATM | 6540 | C3 | PRP | 419 | 7.754  | 14.858 | 35.709 | 1.00 | 0.00 |
| C      |      |    |     |     |        |        |        |      |      |
| HETATM | 6541 | H6 | PRP | 419 | 7.175  | 15.719 | 35.377 | 1.00 | 0.00 |
| H      |      |    |     |     |        |        |        |      |      |
| HETATM | 6542 | H7 | PRP | 419 | 7.903  | 14.114 | 34.926 | 1.00 | 0.00 |
| H      |      |    |     |     |        |        |        |      |      |
| HETATM | 6543 | H8 | PRP | 419 | 7.061  | 14.274 | 36.315 | 1.00 | 0.00 |
| H      |      |    |     |     |        |        |        |      |      |
| HETATM | 6544 | O1 | PRP | 420 | 10.223 | 16.888 | 30.309 | 1.00 | 0.00 |
| O      |      |    |     |     |        |        |        |      |      |
| HETATM | 6545 | H1 | PRP | 420 | 9.364  | 16.460 | 30.327 | 1.00 | 0.00 |
| H      |      |    |     |     |        |        |        |      |      |
| HETATM | 6546 | C1 | PRP | 420 | 10.747 | 17.080 | 31.597 | 1.00 | 0.00 |
| C      |      |    |     |     |        |        |        |      |      |
| HETATM | 6547 | H2 | PRP | 420 | 11.437 | 17.916 | 31.491 | 1.00 | 0.00 |
| H      |      |    |     |     |        |        |        |      |      |
| HETATM | 6548 | H3 | PRP | 420 | 9.935  | 17.413 | 32.243 | 1.00 | 0.00 |
| H      |      |    |     |     |        |        |        |      |      |
| HETATM | 6549 | C2 | PRP | 420 | 11.384 | 15.807 | 32.213 | 1.00 | 0.00 |
| C      |      |    |     |     |        |        |        |      |      |
| HETATM | 6550 | H4 | PRP | 420 | 11.400 | 15.902 | 33.299 | 1.00 | 0.00 |
| H      |      |    |     |     |        |        |        |      |      |
| HETATM | 6551 | O2 | PRP | 420 | 12.721 | 15.627 | 31.785 | 1.00 | 0.00 |
| O      |      |    |     |     |        |        |        |      |      |

|        |      |    |     |     |        |        |        |      |      |
|--------|------|----|-----|-----|--------|--------|--------|------|------|
| HETATM | 6552 | H5 | PRP | 420 | 12.727 | 15.303 | 30.881 | 1.00 | 0.00 |
| H      |      |    |     |     |        |        |        |      |      |
| HETATM | 6553 | C3 | PRP | 420 | 10.592 | 14.517 | 31.959 | 1.00 | 0.00 |
| C      |      |    |     |     |        |        |        |      |      |
| HETATM | 6554 | H6 | PRP | 420 | 9.569  | 14.835 | 32.162 | 1.00 | 0.00 |
| H      |      |    |     |     |        |        |        |      |      |
| HETATM | 6555 | H7 | PRP | 420 | 10.680 | 14.306 | 30.893 | 1.00 | 0.00 |
| H      |      |    |     |     |        |        |        |      |      |
| HETATM | 6556 | H8 | PRP | 420 | 10.803 | 13.738 | 32.691 | 1.00 | 0.00 |
| H      |      |    |     |     |        |        |        |      |      |
| HETATM | 6557 | O1 | PRP | 421 | -6.831 | 6.173  | 13.636 | 1.00 | 0.00 |
| O      |      |    |     |     |        |        |        |      |      |
| HETATM | 6558 | H1 | PRP | 421 | -7.494 | 5.863  | 13.015 | 1.00 | 0.00 |
| H      |      |    |     |     |        |        |        |      |      |
| HETATM | 6559 | C1 | PRP | 421 | -7.223 | 7.490  | 13.882 | 1.00 | 0.00 |
| C      |      |    |     |     |        |        |        |      |      |
| HETATM | 6560 | H2 | PRP | 421 | -6.872 | 8.069  | 13.028 | 1.00 | 0.00 |
| H      |      |    |     |     |        |        |        |      |      |
| HETATM | 6561 | H3 | PRP | 421 | -8.305 | 7.521  | 14.012 | 1.00 | 0.00 |
| H      |      |    |     |     |        |        |        |      |      |
| HETATM | 6562 | C2 | PRP | 421 | -6.475 | 8.052  | 15.079 | 1.00 | 0.00 |
| C      |      |    |     |     |        |        |        |      |      |
| HETATM | 6563 | H4 | PRP | 421 | -5.437 | 7.797  | 14.865 | 1.00 | 0.00 |
| H      |      |    |     |     |        |        |        |      |      |
| HETATM | 6564 | O2 | PRP | 421 | -6.902 | 7.259  | 16.126 | 1.00 | 0.00 |
| O      |      |    |     |     |        |        |        |      |      |
| HETATM | 6565 | H5 | PRP | 421 | -6.754 | 6.340  | 15.891 | 1.00 | 0.00 |
| H      |      |    |     |     |        |        |        |      |      |
| HETATM | 6566 | C3 | PRP | 421 | -6.677 | 9.547  | 15.365 | 1.00 | 0.00 |
| C      |      |    |     |     |        |        |        |      |      |
| HETATM | 6567 | H6 | PRP | 421 | -7.647 | 9.933  | 15.049 | 1.00 | 0.00 |
| H      |      |    |     |     |        |        |        |      |      |
| HETATM | 6568 | H7 | PRP | 421 | -6.500 | 9.792  | 16.412 | 1.00 | 0.00 |
| H      |      |    |     |     |        |        |        |      |      |
| HETATM | 6569 | H8 | PRP | 421 | -6.048 | 10.225 | 14.789 | 1.00 | 0.00 |
| H      |      |    |     |     |        |        |        |      |      |
| HETATM | 6570 | O1 | PRP | 422 | 2.884  | 14.358 | 31.977 | 1.00 | 0.00 |
| O      |      |    |     |     |        |        |        |      |      |
| HETATM | 6571 | H1 | PRP | 422 | 2.409  | 14.414 | 32.809 | 1.00 | 0.00 |
| H      |      |    |     |     |        |        |        |      |      |
| HETATM | 6572 | C1 | PRP | 422 | 2.552  | 13.052 | 31.469 | 1.00 | 0.00 |
| C      |      |    |     |     |        |        |        |      |      |
| HETATM | 6573 | H2 | PRP | 422 | 2.503  | 13.143 | 30.383 | 1.00 | 0.00 |
| H      |      |    |     |     |        |        |        |      |      |
| HETATM | 6574 | H3 | PRP | 422 | 3.327  | 12.353 | 31.782 | 1.00 | 0.00 |
| H      |      |    |     |     |        |        |        |      |      |
| HETATM | 6575 | C2 | PRP | 422 | 1.221  | 12.603 | 32.138 | 1.00 | 0.00 |
| C      |      |    |     |     |        |        |        |      |      |
| HETATM | 6576 | H4 | PRP | 422 | 0.364  | 13.234 | 31.900 | 1.00 | 0.00 |
| H      |      |    |     |     |        |        |        |      |      |
| HETATM | 6577 | O2 | PRP | 422 | 1.395  | 12.875 | 33.511 | 1.00 | 0.00 |
| O      |      |    |     |     |        |        |        |      |      |
| HETATM | 6578 | H5 | PRP | 422 | 0.559  | 12.717 | 33.955 | 1.00 | 0.00 |
| H      |      |    |     |     |        |        |        |      |      |
| HETATM | 6579 | C3 | PRP | 422 | 0.909  | 11.134 | 31.990 | 1.00 | 0.00 |
| C      |      |    |     |     |        |        |        |      |      |

|        |      |    |     |     |        |        |        |      |      |
|--------|------|----|-----|-----|--------|--------|--------|------|------|
| HETATM | 6580 | H6 | PRP | 422 | 0.089  | 10.906 | 32.672 | 1.00 | 0.00 |
| H      |      |    |     |     |        |        |        |      |      |
| HETATM | 6581 | H7 | PRP | 422 | 0.598  | 10.925 | 30.966 | 1.00 | 0.00 |
| H      |      |    |     |     |        |        |        |      |      |
| HETATM | 6582 | H8 | PRP | 422 | 1.813  | 10.568 | 32.213 | 1.00 | 0.00 |
| H      |      |    |     |     |        |        |        |      |      |
| HETATM | 6583 | O1 | PRP | 423 | 12.658 | 3.172  | 28.863 | 1.00 | 0.00 |
| O      |      |    |     |     |        |        |        |      |      |
| HETATM | 6584 | H1 | PRP | 423 | 12.908 | 3.890  | 29.449 | 1.00 | 0.00 |
| H      |      |    |     |     |        |        |        |      |      |
| HETATM | 6585 | C1 | PRP | 423 | 11.273 | 3.115  | 28.607 | 1.00 | 0.00 |
| C      |      |    |     |     |        |        |        |      |      |
| HETATM | 6586 | H2 | PRP | 423 | 11.030 | 2.291  | 27.935 | 1.00 | 0.00 |
| H      |      |    |     |     |        |        |        |      |      |
| HETATM | 6587 | H3 | PRP | 423 | 10.652 | 3.043  | 29.500 | 1.00 | 0.00 |
| H      |      |    |     |     |        |        |        |      |      |
| HETATM | 6588 | C2 | PRP | 423 | 10.731 | 4.385  | 27.900 | 1.00 | 0.00 |
| C      |      |    |     |     |        |        |        |      |      |
| HETATM | 6589 | H4 | PRP | 423 | 11.448 | 4.519  | 27.090 | 1.00 | 0.00 |
| H      |      |    |     |     |        |        |        |      |      |
| HETATM | 6590 | O2 | PRP | 423 | 10.629 | 5.625  | 28.613 | 1.00 | 0.00 |
| O      |      |    |     |     |        |        |        |      |      |
| HETATM | 6591 | H5 | PRP | 423 | 11.307 | 5.654  | 29.291 | 1.00 | 0.00 |
| H      |      |    |     |     |        |        |        |      |      |
| HETATM | 6592 | C3 | PRP | 423 | 9.429  | 4.090  | 27.219 | 1.00 | 0.00 |
| C      |      |    |     |     |        |        |        |      |      |
| HETATM | 6593 | H6 | PRP | 423 | 9.127  | 4.868  | 26.518 | 1.00 | 0.00 |
| H      |      |    |     |     |        |        |        |      |      |
| HETATM | 6594 | H7 | PRP | 423 | 9.516  | 3.070  | 26.845 | 1.00 | 0.00 |
| H      |      |    |     |     |        |        |        |      |      |
| HETATM | 6595 | H8 | PRP | 423 | 8.686  | 3.968  | 28.007 | 1.00 | 0.00 |
| H      |      |    |     |     |        |        |        |      |      |
| HETATM | 6596 | O1 | PRP | 424 | 15.630 | 3.847  | 16.875 | 1.00 | 0.00 |
| O      |      |    |     |     |        |        |        |      |      |
| HETATM | 6597 | H1 | PRP | 424 | 15.759 | 3.087  | 16.303 | 1.00 | 0.00 |
| H      |      |    |     |     |        |        |        |      |      |
| HETATM | 6598 | C1 | PRP | 424 | 14.219 | 4.238  | 16.762 | 1.00 | 0.00 |
| C      |      |    |     |     |        |        |        |      |      |
| HETATM | 6599 | H2 | PRP | 424 | 14.093 | 5.290  | 17.016 | 1.00 | 0.00 |
| H      |      |    |     |     |        |        |        |      |      |
| HETATM | 6600 | H3 | PRP | 424 | 13.870 | 4.135  | 15.734 | 1.00 | 0.00 |
| H      |      |    |     |     |        |        |        |      |      |
| HETATM | 6601 | C2 | PRP | 424 | 13.406 | 3.343  | 17.706 | 1.00 | 0.00 |
| C      |      |    |     |     |        |        |        |      |      |
| HETATM | 6602 | H4 | PRP | 424 | 13.759 | 3.568  | 18.713 | 1.00 | 0.00 |
| H      |      |    |     |     |        |        |        |      |      |
| HETATM | 6603 | O2 | PRP | 424 | 13.655 | 1.967  | 17.460 | 1.00 | 0.00 |
| O      |      |    |     |     |        |        |        |      |      |
| HETATM | 6604 | H5 | PRP | 424 | 14.589 | 1.745  | 17.429 | 1.00 | 0.00 |
| H      |      |    |     |     |        |        |        |      |      |
| HETATM | 6605 | C3 | PRP | 424 | 11.901 | 3.648  | 17.598 | 1.00 | 0.00 |
| C      |      |    |     |     |        |        |        |      |      |
| HETATM | 6606 | H6 | PRP | 424 | 11.570 | 3.412  | 16.586 | 1.00 | 0.00 |
| H      |      |    |     |     |        |        |        |      |      |
| HETATM | 6607 | H7 | PRP | 424 | 11.372 | 3.123  | 18.393 | 1.00 | 0.00 |
| H      |      |    |     |     |        |        |        |      |      |

|        |      |    |     |     |        |        |        |      |      |
|--------|------|----|-----|-----|--------|--------|--------|------|------|
| HETATM | 6608 | H8 | PRP | 424 | 11.749 | 4.716  | 17.755 | 1.00 | 0.00 |
| H      |      |    |     |     |        |        |        |      |      |
| HETATM | 6609 | O1 | PRP | 425 | 16.522 | -1.595 | 26.249 | 1.00 | 0.00 |
| O      |      |    |     |     |        |        |        |      |      |
| HETATM | 6610 | H1 | PRP | 425 | 15.864 | -1.488 | 26.940 | 1.00 | 0.00 |
| H      |      |    |     |     |        |        |        |      |      |
| HETATM | 6611 | C1 | PRP | 425 | 17.157 | -2.892 | 26.279 | 1.00 | 0.00 |
| C      |      |    |     |     |        |        |        |      |      |
| HETATM | 6612 | H2 | PRP | 425 | 16.440 | -3.698 | 26.435 | 1.00 | 0.00 |
| H      |      |    |     |     |        |        |        |      |      |
| HETATM | 6613 | H3 | PRP | 425 | 17.611 | -3.057 | 25.302 | 1.00 | 0.00 |
| H      |      |    |     |     |        |        |        |      |      |
| HETATM | 6614 | C2 | PRP | 425 | 18.242 | -3.059 | 27.426 | 1.00 | 0.00 |
| C      |      |    |     |     |        |        |        |      |      |
| HETATM | 6615 | H4 | PRP | 425 | 18.897 | -3.893 | 27.173 | 1.00 | 0.00 |
| H      |      |    |     |     |        |        |        |      |      |
| HETATM | 6616 | O2 | PRP | 425 | 17.584 | -3.267 | 28.623 | 1.00 | 0.00 |
| O      |      |    |     |     |        |        |        |      |      |
| HETATM | 6617 | H5 | PRP | 425 | 16.920 | -2.596 | 28.797 | 1.00 | 0.00 |
| H      |      |    |     |     |        |        |        |      |      |
| HETATM | 6618 | C3 | PRP | 425 | 19.134 | -1.825 | 27.485 | 1.00 | 0.00 |
| C      |      |    |     |     |        |        |        |      |      |
| HETATM | 6619 | H6 | PRP | 425 | 19.699 | -1.712 | 26.560 | 1.00 | 0.00 |
| H      |      |    |     |     |        |        |        |      |      |
| HETATM | 6620 | H7 | PRP | 425 | 18.611 | -0.907 | 27.753 | 1.00 | 0.00 |
| H      |      |    |     |     |        |        |        |      |      |
| HETATM | 6621 | H8 | PRP | 425 | 19.900 | -2.036 | 28.230 | 1.00 | 0.00 |
| H      |      |    |     |     |        |        |        |      |      |
| HETATM | 6622 | O1 | PRP | 426 | 6.843  | 1.428  | 33.800 | 1.00 | 0.00 |
| O      |      |    |     |     |        |        |        |      |      |
| HETATM | 6623 | H1 | PRP | 426 | 6.015  | 1.035  | 33.517 | 1.00 | 0.00 |
| H      |      |    |     |     |        |        |        |      |      |
| HETATM | 6624 | C1 | PRP | 426 | 7.466  | 0.447  | 34.656 | 1.00 | 0.00 |
| C      |      |    |     |     |        |        |        |      |      |
| HETATM | 6625 | H2 | PRP | 426 | 8.374  | 0.856  | 35.098 | 1.00 | 0.00 |
| H      |      |    |     |     |        |        |        |      |      |
| HETATM | 6626 | H3 | PRP | 426 | 6.827  | 0.259  | 35.519 | 1.00 | 0.00 |
| H      |      |    |     |     |        |        |        |      |      |
| HETATM | 6627 | C2 | PRP | 426 | 7.747  | -0.838 | 33.849 | 1.00 | 0.00 |
| C      |      |    |     |     |        |        |        |      |      |
| HETATM | 6628 | H4 | PRP | 426 | 8.079  | -0.641 | 32.830 | 1.00 | 0.00 |
| H      |      |    |     |     |        |        |        |      |      |
| HETATM | 6629 | O2 | PRP | 426 | 6.483  | -1.531 | 33.711 | 1.00 | 0.00 |
| O      |      |    |     |     |        |        |        |      |      |
| HETATM | 6630 | H5 | PRP | 426 | 6.009  | -0.925 | 33.137 | 1.00 | 0.00 |
| H      |      |    |     |     |        |        |        |      |      |
| HETATM | 6631 | C3 | PRP | 426 | 8.768  | -1.865 | 34.415 | 1.00 | 0.00 |
| C      |      |    |     |     |        |        |        |      |      |
| HETATM | 6632 | H6 | PRP | 426 | 8.887  | -2.714 | 33.742 | 1.00 | 0.00 |
| H      |      |    |     |     |        |        |        |      |      |
| HETATM | 6633 | H7 | PRP | 426 | 9.733  | -1.364 | 34.490 | 1.00 | 0.00 |
| H      |      |    |     |     |        |        |        |      |      |
| HETATM | 6634 | H8 | PRP | 426 | 8.486  | -2.126 | 35.434 | 1.00 | 0.00 |
| H      |      |    |     |     |        |        |        |      |      |
| HETATM | 6635 | O1 | PRP | 427 | 4.240  | -0.856 | 14.845 | 1.00 | 0.00 |
| O      |      |    |     |     |        |        |        |      |      |



|        |      |    |     |     |        |         |        |      |      |
|--------|------|----|-----|-----|--------|---------|--------|------|------|
| HETATM | 6636 | H1 | PRP | 427 | 5.140  | -0.919  | 15.171 | 1.00 | 0.00 |
| H      |      |    |     |     |        |         |        |      |      |
| HETATM | 6637 | C1 | PRP | 427 | 3.331  | -1.010  | 15.888 | 1.00 | 0.00 |
| C      |      |    |     |     |        |         |        |      |      |
| HETATM | 6638 | H2 | PRP | 427 | 3.626  | -0.314  | 16.673 | 1.00 | 0.00 |
| H      |      |    |     |     |        |         |        |      |      |
| HETATM | 6639 | H3 | PRP | 427 | 2.365  | -0.666  | 15.519 | 1.00 | 0.00 |
| H      |      |    |     |     |        |         |        |      |      |
| HETATM | 6640 | C2 | PRP | 427 | 3.378  | -2.463  | 16.490 | 1.00 | 0.00 |
| C      |      |    |     |     |        |         |        |      |      |
| HETATM | 6641 | H4 | PRP | 427 | 4.349  | -2.930  | 16.325 | 1.00 | 0.00 |
| H      |      |    |     |     |        |         |        |      |      |
| HETATM | 6642 | O2 | PRP | 427 | 2.474  | -3.341  | 15.786 | 1.00 | 0.00 |
| O      |      |    |     |     |        |         |        |      |      |
| HETATM | 6643 | H5 | PRP | 427 | 2.918  | -3.450  | 14.942 | 1.00 | 0.00 |
| H      |      |    |     |     |        |         |        |      |      |
| HETATM | 6644 | C3 | PRP | 427 | 2.933  | -2.542  | 17.987 | 1.00 | 0.00 |
| C      |      |    |     |     |        |         |        |      |      |
| HETATM | 6645 | H6 | PRP | 427 | 2.031  | -1.974  | 18.214 | 1.00 | 0.00 |
| H      |      |    |     |     |        |         |        |      |      |
| HETATM | 6646 | H7 | PRP | 427 | 2.739  | -3.562  | 18.318 | 1.00 | 0.00 |
| H      |      |    |     |     |        |         |        |      |      |
| HETATM | 6647 | H8 | PRP | 427 | 3.750  | -2.071  | 18.535 | 1.00 | 0.00 |
| H      |      |    |     |     |        |         |        |      |      |
| HETATM | 6648 | O1 | PRP | 428 | -4.192 | 10.742  | 22.962 | 1.00 | 0.00 |
| O      |      |    |     |     |        |         |        |      |      |
| HETATM | 6649 | H1 | PRP | 428 | -3.529 | 10.283  | 23.482 | 1.00 | 0.00 |
| H      |      |    |     |     |        |         |        |      |      |
| HETATM | 6650 | C1 | PRP | 428 | -3.473 | 11.419  | 21.990 | 1.00 | 0.00 |
| C      |      |    |     |     |        |         |        |      |      |
| HETATM | 6651 | H2 | PRP | 428 | -4.142 | 12.016  | 21.371 | 1.00 | 0.00 |
| H      |      |    |     |     |        |         |        |      |      |
| HETATM | 6652 | H3 | PRP | 428 | -2.717 | 12.015  | 22.501 | 1.00 | 0.00 |
| H      |      |    |     |     |        |         |        |      |      |
| HETATM | 6653 | C2 | PRP | 428 | -2.615 | 10.404  | 21.102 | 1.00 | 0.00 |
| C      |      |    |     |     |        |         |        |      |      |
| HETATM | 6654 | H4 | PRP | 428 | -3.075 | 9.417   | 21.039 | 1.00 | 0.00 |
| H      |      |    |     |     |        |         |        |      |      |
| HETATM | 6655 | O2 | PRP | 428 | -1.366 | 10.320  | 21.672 | 1.00 | 0.00 |
| O      |      |    |     |     |        |         |        |      |      |
| HETATM | 6656 | H5 | PRP | 428 | -1.467 | 10.317  | 22.627 | 1.00 | 0.00 |
| H      |      |    |     |     |        |         |        |      |      |
| HETATM | 6657 | C3 | PRP | 428 | -2.363 | 10.848  | 19.605 | 1.00 | 0.00 |
| C      |      |    |     |     |        |         |        |      |      |
| HETATM | 6658 | H6 | PRP | 428 | -1.844 | 11.806  | 19.653 | 1.00 | 0.00 |
| H      |      |    |     |     |        |         |        |      |      |
| HETATM | 6659 | H7 | PRP | 428 | -1.816 | 10.060  | 19.087 | 1.00 | 0.00 |
| H      |      |    |     |     |        |         |        |      |      |
| HETATM | 6660 | H8 | PRP | 428 | -3.265 | 11.056  | 19.029 | 1.00 | 0.00 |
| H      |      |    |     |     |        |         |        |      |      |
| HETATM | 6661 | O1 | PRP | 429 | 23.433 | -9.639  | 24.912 | 1.00 | 0.00 |
| O      |      |    |     |     |        |         |        |      |      |
| HETATM | 6662 | H1 | PRP | 429 | 22.835 | -10.210 | 25.398 | 1.00 | 0.00 |
| H      |      |    |     |     |        |         |        |      |      |
| HETATM | 6663 | C1 | PRP | 429 | 23.034 | -9.722  | 23.560 | 1.00 | 0.00 |
| C      |      |    |     |     |        |         |        |      |      |

|        |      |    |     |     |        |         |        |      |      |
|--------|------|----|-----|-----|--------|---------|--------|------|------|
| HETATM | 6664 | H2 | PRP | 429 | 22.240 | -8.976  | 23.529 | 1.00 | 0.00 |
| H      |      |    |     |     |        |         |        |      |      |
| HETATM | 6665 | H3 | PRP | 429 | 23.859 | -9.394  | 22.927 | 1.00 | 0.00 |
| H      |      |    |     |     |        |         |        |      |      |
| HETATM | 6666 | C2 | PRP | 429 | 22.576 | -11.183 | 23.358 | 1.00 | 0.00 |
| C      |      |    |     |     |        |         |        |      |      |
| HETATM | 6667 | H4 | PRP | 429 | 22.159 | -11.267 | 22.354 | 1.00 | 0.00 |
| H      |      |    |     |     |        |         |        |      |      |
| HETATM | 6668 | O2 | PRP | 429 | 21.518 | -11.491 | 24.260 | 1.00 | 0.00 |
| O      |      |    |     |     |        |         |        |      |      |
| HETATM | 6669 | H5 | PRP | 429 | 20.885 | -12.071 | 23.831 | 1.00 | 0.00 |
| H      |      |    |     |     |        |         |        |      |      |
| HETATM | 6670 | C3 | PRP | 429 | 23.536 | -12.305 | 23.519 | 1.00 | 0.00 |
| C      |      |    |     |     |        |         |        |      |      |
| HETATM | 6671 | H6 | PRP | 429 | 24.446 | -12.196 | 22.930 | 1.00 | 0.00 |
| H      |      |    |     |     |        |         |        |      |      |
| HETATM | 6672 | H7 | PRP | 429 | 23.858 | -12.412 | 24.556 | 1.00 | 0.00 |
| H      |      |    |     |     |        |         |        |      |      |
| HETATM | 6673 | H8 | PRP | 429 | 22.953 | -13.190 | 23.264 | 1.00 | 0.00 |
| H      |      |    |     |     |        |         |        |      |      |
| HETATM | 6674 | O1 | PRP | 430 | 19.524 | -13.899 | 31.101 | 1.00 | 0.00 |
| O      |      |    |     |     |        |         |        |      |      |
| HETATM | 6675 | H1 | PRP | 430 | 19.329 | -14.839 | 31.098 | 1.00 | 0.00 |
| H      |      |    |     |     |        |         |        |      |      |
| HETATM | 6676 | C1 | PRP | 430 | 18.772 | -13.308 | 32.137 | 1.00 | 0.00 |
| C      |      |    |     |     |        |         |        |      |      |
| HETATM | 6677 | H2 | PRP | 430 | 18.676 | -12.245 | 31.917 | 1.00 | 0.00 |
| H      |      |    |     |     |        |         |        |      |      |
| HETATM | 6678 | H3 | PRP | 430 | 17.812 | -13.823 | 32.180 | 1.00 | 0.00 |
| H      |      |    |     |     |        |         |        |      |      |
| HETATM | 6679 | C2 | PRP | 430 | 19.471 | -13.525 | 33.438 | 1.00 | 0.00 |
| C      |      |    |     |     |        |         |        |      |      |
| HETATM | 6680 | H4 | PRP | 430 | 20.540 | -13.316 | 33.383 | 1.00 | 0.00 |
| H      |      |    |     |     |        |         |        |      |      |
| HETATM | 6681 | O2 | PRP | 430 | 19.364 | -14.860 | 33.841 | 1.00 | 0.00 |
| O      |      |    |     |     |        |         |        |      |      |
| HETATM | 6682 | H5 | PRP | 430 | 18.449 | -15.139 | 33.928 | 1.00 | 0.00 |
| H      |      |    |     |     |        |         |        |      |      |
| HETATM | 6683 | C3 | PRP | 430 | 18.726 | -12.613 | 34.495 | 1.00 | 0.00 |
| C      |      |    |     |     |        |         |        |      |      |
| HETATM | 6684 | H6 | PRP | 430 | 19.168 | -12.805 | 35.473 | 1.00 | 0.00 |
| H      |      |    |     |     |        |         |        |      |      |
| HETATM | 6685 | H7 | PRP | 430 | 18.904 | -11.572 | 34.226 | 1.00 | 0.00 |
| H      |      |    |     |     |        |         |        |      |      |
| HETATM | 6686 | H8 | PRP | 430 | 17.660 | -12.831 | 34.551 | 1.00 | 0.00 |
| H      |      |    |     |     |        |         |        |      |      |
| HETATM | 6687 | O1 | PRP | 431 | -4.851 | 5.157   | 10.553 | 1.00 | 0.00 |
| O      |      |    |     |     |        |         |        |      |      |
| HETATM | 6688 | H1 | PRP | 431 | -5.511 | 5.312   | 9.873  | 1.00 | 0.00 |
| H      |      |    |     |     |        |         |        |      |      |
| HETATM | 6689 | C1 | PRP | 431 | -3.522 | 4.756   | 10.061 | 1.00 | 0.00 |
| C      |      |    |     |     |        |         |        |      |      |
| HETATM | 6690 | H2 | PRP | 431 | -2.939 | 5.671   | 9.957  | 1.00 | 0.00 |
| H      |      |    |     |     |        |         |        |      |      |
| HETATM | 6691 | H3 | PRP | 431 | -2.923 | 4.036   | 10.620 | 1.00 | 0.00 |
| H      |      |    |     |     |        |         |        |      |      |

|        |      |    |     |     |         |        |        |      |      |
|--------|------|----|-----|-----|---------|--------|--------|------|------|
| HETATM | 6692 | C2 | PRP | 431 | -3.640  | 4.175  | 8.637  | 1.00 | 0.00 |
| C      |      |    |     |     |         |        |        |      |      |
| HETATM | 6693 | H4 | PRP | 431 | -3.853  | 5.011  | 7.971  | 1.00 | 0.00 |
| H      |      |    |     |     |         |        |        |      |      |
| HETATM | 6694 | O2 | PRP | 431 | -4.719  | 3.281  | 8.594  | 1.00 | 0.00 |
| O      |      |    |     |     |         |        |        |      |      |
| HETATM | 6695 | H5 | PRP | 431 | -4.695  | 2.677  | 9.340  | 1.00 | 0.00 |
| H      |      |    |     |     |         |        |        |      |      |
| HETATM | 6696 | C3 | PRP | 431 | -2.326  | 3.497  | 8.173  | 1.00 | 0.00 |
| C      |      |    |     |     |         |        |        |      |      |
| HETATM | 6697 | H6 | PRP | 431 | -2.619  | 3.131  | 7.188  | 1.00 | 0.00 |
| H      |      |    |     |     |         |        |        |      |      |
| HETATM | 6698 | H7 | PRP | 431 | -1.599  | 4.305  | 8.088  | 1.00 | 0.00 |
| H      |      |    |     |     |         |        |        |      |      |
| HETATM | 6699 | H8 | PRP | 431 | -1.866  | 2.724  | 8.788  | 1.00 | 0.00 |
| H      |      |    |     |     |         |        |        |      |      |
| HETATM | 6700 | O1 | PRP | 432 | 11.612  | 7.382  | 17.096 | 1.00 | 0.00 |
| O      |      |    |     |     |         |        |        |      |      |
| HETATM | 6701 | H1 | PRP | 432 | 11.264  | 6.497  | 17.226 | 1.00 | 0.00 |
| H      |      |    |     |     |         |        |        |      |      |
| HETATM | 6702 | C1 | PRP | 432 | 10.996  | 8.231  | 18.017 | 1.00 | 0.00 |
| C      |      |    |     |     |         |        |        |      |      |
| HETATM | 6703 | H2 | PRP | 432 | 11.333  | 9.263  | 17.918 | 1.00 | 0.00 |
| H      |      |    |     |     |         |        |        |      |      |
| HETATM | 6704 | H3 | PRP | 432 | 9.938   | 8.168  | 17.760 | 1.00 | 0.00 |
| H      |      |    |     |     |         |        |        |      |      |
| HETATM | 6705 | C2 | PRP | 432 | 11.186  | 7.647  | 19.451 | 1.00 | 0.00 |
| C      |      |    |     |     |         |        |        |      |      |
| HETATM | 6706 | H4 | PRP | 432 | 12.263  | 7.498  | 19.521 | 1.00 | 0.00 |
| H      |      |    |     |     |         |        |        |      |      |
| HETATM | 6707 | O2 | PRP | 432 | 10.417  | 6.490  | 19.649 | 1.00 | 0.00 |
| O      |      |    |     |     |         |        |        |      |      |
| HETATM | 6708 | H5 | PRP | 432 | 9.474   | 6.669  | 19.630 | 1.00 | 0.00 |
| H      |      |    |     |     |         |        |        |      |      |
| HETATM | 6709 | C3 | PRP | 432 | 10.810  | 8.631  | 20.537 | 1.00 | 0.00 |
| C      |      |    |     |     |         |        |        |      |      |
| HETATM | 6710 | H6 | PRP | 432 | 10.937  | 8.157  | 21.510 | 1.00 | 0.00 |
| H      |      |    |     |     |         |        |        |      |      |
| HETATM | 6711 | H7 | PRP | 432 | 11.398  | 9.549  | 20.555 | 1.00 | 0.00 |
| H      |      |    |     |     |         |        |        |      |      |
| HETATM | 6712 | H8 | PRP | 432 | 9.752   | 8.889  | 20.479 | 1.00 | 0.00 |
| H      |      |    |     |     |         |        |        |      |      |
| HETATM | 6713 | O1 | PRP | 433 | -13.610 | 13.711 | 30.369 | 1.00 | 0.00 |
| O      |      |    |     |     |         |        |        |      |      |
| HETATM | 6714 | H1 | PRP | 433 | -12.661 | 13.578 | 30.426 | 1.00 | 0.00 |
| H      |      |    |     |     |         |        |        |      |      |
| HETATM | 6715 | C1 | PRP | 433 | -13.821 | 14.965 | 29.755 | 1.00 | 0.00 |
| C      |      |    |     |     |         |        |        |      |      |
| HETATM | 6716 | H2 | PRP | 433 | -14.904 | 15.092 | 29.750 | 1.00 | 0.00 |
| H      |      |    |     |     |         |        |        |      |      |
| HETATM | 6717 | H3 | PRP | 433 | -13.413 | 15.767 | 30.370 | 1.00 | 0.00 |
| H      |      |    |     |     |         |        |        |      |      |
| HETATM | 6718 | C2 | PRP | 433 | -13.358 | 15.049 | 28.339 | 1.00 | 0.00 |
| C      |      |    |     |     |         |        |        |      |      |
| HETATM | 6719 | H4 | PRP | 433 | -13.652 | 14.195 | 27.728 | 1.00 | 0.00 |
| H      |      |    |     |     |         |        |        |      |      |

|        |      |    |     |     |         |        |        |      |      |
|--------|------|----|-----|-----|---------|--------|--------|------|------|
| HETATM | 6720 | O2 | PRP | 433 | -11.991 | 15.243 | 28.502 | 1.00 | 0.00 |
| O      |      |    |     |     |         |        |        |      |      |
| HETATM | 6721 | H5 | PRP | 433 | -11.501 | 15.163 | 27.681 | 1.00 | 0.00 |
| H      |      |    |     |     |         |        |        |      |      |
| HETATM | 6722 | C3 | PRP | 433 | -13.782 | 16.392 | 27.715 | 1.00 | 0.00 |
| C      |      |    |     |     |         |        |        |      |      |
| HETATM | 6723 | H6 | PRP | 433 | -13.480 | 16.360 | 26.668 | 1.00 | 0.00 |
| H      |      |    |     |     |         |        |        |      |      |
| HETATM | 6724 | H7 | PRP | 433 | -14.850 | 16.605 | 27.762 | 1.00 | 0.00 |
| H      |      |    |     |     |         |        |        |      |      |
| HETATM | 6725 | H8 | PRP | 433 | -13.391 | 17.267 | 28.234 | 1.00 | 0.00 |
| H      |      |    |     |     |         |        |        |      |      |
| HETATM | 6726 | O1 | PRP | 434 | -8.897  | 30.692 | 26.925 | 1.00 | 0.00 |
| O      |      |    |     |     |         |        |        |      |      |
| HETATM | 6727 | H1 | PRP | 434 | -9.843  | 30.846 | 26.971 | 1.00 | 0.00 |
| H      |      |    |     |     |         |        |        |      |      |
| HETATM | 6728 | C1 | PRP | 434 | -8.266  | 31.315 | 27.968 | 1.00 | 0.00 |
| C      |      |    |     |     |         |        |        |      |      |
| HETATM | 6729 | H2 | PRP | 434 | -8.747  | 32.286 | 28.088 | 1.00 | 0.00 |
| H      |      |    |     |     |         |        |        |      |      |
| HETATM | 6730 | H3 | PRP | 434 | -8.361  | 30.810 | 28.929 | 1.00 | 0.00 |
| H      |      |    |     |     |         |        |        |      |      |
| HETATM | 6731 | C2 | PRP | 434 | -6.784  | 31.448 | 27.774 | 1.00 | 0.00 |
| C      |      |    |     |     |         |        |        |      |      |
| HETATM | 6732 | H4 | PRP | 434 | -6.513  | 32.216 | 27.050 | 1.00 | 0.00 |
| H      |      |    |     |     |         |        |        |      |      |
| HETATM | 6733 | O2 | PRP | 434 | -6.306  | 30.282 | 27.185 | 1.00 | 0.00 |
| O      |      |    |     |     |         |        |        |      |      |
| HETATM | 6734 | H5 | PRP | 434 | -6.917  | 30.109 | 26.465 | 1.00 | 0.00 |
| H      |      |    |     |     |         |        |        |      |      |
| HETATM | 6735 | C3 | PRP | 434 | -6.020  | 31.673 | 29.093 | 1.00 | 0.00 |
| C      |      |    |     |     |         |        |        |      |      |
| HETATM | 6736 | H6 | PRP | 434 | -6.634  | 32.177 | 29.839 | 1.00 | 0.00 |
| H      |      |    |     |     |         |        |        |      |      |
| HETATM | 6737 | H7 | PRP | 434 | -5.780  | 30.698 | 29.516 | 1.00 | 0.00 |
| H      |      |    |     |     |         |        |        |      |      |
| HETATM | 6738 | H8 | PRP | 434 | -5.132  | 32.288 | 28.947 | 1.00 | 0.00 |
| H      |      |    |     |     |         |        |        |      |      |
| HETATM | 6739 | O1 | PRP | 435 | -4.280  | 13.155 | 35.919 | 1.00 | 0.00 |
| O      |      |    |     |     |         |        |        |      |      |
| HETATM | 6740 | H1 | PRP | 435 | -4.443  | 13.831 | 36.581 | 1.00 | 0.00 |
| H      |      |    |     |     |         |        |        |      |      |
| HETATM | 6741 | C1 | PRP | 435 | -3.623  | 13.797 | 34.789 | 1.00 | 0.00 |
| C      |      |    |     |     |         |        |        |      |      |
| HETATM | 6742 | H2 | PRP | 435 | -4.459  | 13.933 | 34.102 | 1.00 | 0.00 |
| H      |      |    |     |     |         |        |        |      |      |
| HETATM | 6743 | H3 | PRP | 435 | -3.177  | 14.758 | 35.046 | 1.00 | 0.00 |
| H      |      |    |     |     |         |        |        |      |      |
| HETATM | 6744 | C2 | PRP | 435 | -2.600  | 12.790 | 34.106 | 1.00 | 0.00 |
| C      |      |    |     |     |         |        |        |      |      |
| HETATM | 6745 | H4 | PRP | 435 | -2.744  | 11.748 | 34.393 | 1.00 | 0.00 |
| H      |      |    |     |     |         |        |        |      |      |
| HETATM | 6746 | O2 | PRP | 435 | -1.347  | 13.186 | 34.513 | 1.00 | 0.00 |
| O      |      |    |     |     |         |        |        |      |      |
| HETATM | 6747 | H5 | PRP | 435 | -1.232  | 12.935 | 35.433 | 1.00 | 0.00 |
| H      |      |    |     |     |         |        |        |      |      |

|        |      |    |     |     |        |        |        |      |      |
|--------|------|----|-----|-----|--------|--------|--------|------|------|
| HETATM | 6748 | C3 | PRP | 435 | -2.857 | 12.915 | 32.616 | 1.00 | 0.00 |
| C      |      |    |     |     |        |        |        |      |      |
| HETATM | 6749 | H6 | PRP | 435 | -2.610 | 13.929 | 32.301 | 1.00 | 0.00 |
| H      |      |    |     |     |        |        |        |      |      |
| HETATM | 6750 | H7 | PRP | 435 | -2.199 | 12.271 | 32.033 | 1.00 | 0.00 |
| H      |      |    |     |     |        |        |        |      |      |
| HETATM | 6751 | H8 | PRP | 435 | -3.864 | 12.601 | 32.341 | 1.00 | 0.00 |
| H      |      |    |     |     |        |        |        |      |      |
| HETATM | 6752 | O1 | PRP | 436 | 9.006  | 2.785  | 32.774 | 1.00 | 0.00 |
| O      |      |    |     |     |        |        |        |      |      |
| HETATM | 6753 | H1 | PRP | 436 | 8.161  | 2.691  | 33.220 | 1.00 | 0.00 |
| H      |      |    |     |     |        |        |        |      |      |
| HETATM | 6754 | C1 | PRP | 436 | 8.809  | 2.040  | 31.568 | 1.00 | 0.00 |
| C      |      |    |     |     |        |        |        |      |      |
| HETATM | 6755 | H2 | PRP | 436 | 9.749  | 1.928  | 31.027 | 1.00 | 0.00 |
| H      |      |    |     |     |        |        |        |      |      |
| HETATM | 6756 | H3 | PRP | 436 | 8.538  | 0.993  | 31.706 | 1.00 | 0.00 |
| H      |      |    |     |     |        |        |        |      |      |
| HETATM | 6757 | C2 | PRP | 436 | 7.868  | 2.598  | 30.445 | 1.00 | 0.00 |
| C      |      |    |     |     |        |        |        |      |      |
| HETATM | 6758 | H4 | PRP | 436 | 8.221  | 3.590  | 30.162 | 1.00 | 0.00 |
| H      |      |    |     |     |        |        |        |      |      |
| HETATM | 6759 | O2 | PRP | 436 | 6.675  | 2.698  | 31.108 | 1.00 | 0.00 |
| O      |      |    |     |     |        |        |        |      |      |
| HETATM | 6760 | H5 | PRP | 436 | 6.787  | 3.425  | 31.725 | 1.00 | 0.00 |
| H      |      |    |     |     |        |        |        |      |      |
| HETATM | 6761 | C3 | PRP | 436 | 7.595  | 1.570  | 29.382 | 1.00 | 0.00 |
| C      |      |    |     |     |        |        |        |      |      |
| HETATM | 6762 | H6 | PRP | 436 | 7.280  | 0.616  | 29.803 | 1.00 | 0.00 |
| H      |      |    |     |     |        |        |        |      |      |
| HETATM | 6763 | H7 | PRP | 436 | 6.807  | 2.064  | 28.813 | 1.00 | 0.00 |
| H      |      |    |     |     |        |        |        |      |      |
| HETATM | 6764 | H8 | PRP | 436 | 8.542  | 1.407  | 28.868 | 1.00 | 0.00 |
| H      |      |    |     |     |        |        |        |      |      |
| HETATM | 6765 | O1 | PRP | 437 | 1.260  | 10.940 | 27.280 | 1.00 | 0.00 |
| O      |      |    |     |     |        |        |        |      |      |
| HETATM | 6766 | H1 | PRP | 437 | 1.625  | 10.169 | 27.721 | 1.00 | 0.00 |
| H      |      |    |     |     |        |        |        |      |      |
| HETATM | 6767 | C1 | PRP | 437 | 0.770  | 11.724 | 28.366 | 1.00 | 0.00 |
| C      |      |    |     |     |        |        |        |      |      |
| HETATM | 6768 | H2 | PRP | 437 | 0.017  | 11.055 | 28.782 | 1.00 | 0.00 |
| H      |      |    |     |     |        |        |        |      |      |
| HETATM | 6769 | H3 | PRP | 437 | 1.511  | 12.131 | 29.053 | 1.00 | 0.00 |
| H      |      |    |     |     |        |        |        |      |      |
| HETATM | 6770 | C2 | PRP | 437 | -0.092 | 12.857 | 27.814 | 1.00 | 0.00 |
| C      |      |    |     |     |        |        |        |      |      |
| HETATM | 6771 | H4 | PRP | 437 | -0.961 | 12.417 | 27.323 | 1.00 | 0.00 |
| H      |      |    |     |     |        |        |        |      |      |
| HETATM | 6772 | O2 | PRP | 437 | 0.611  | 13.767 | 26.930 | 1.00 | 0.00 |
| O      |      |    |     |     |        |        |        |      |      |
| HETATM | 6773 | H5 | PRP | 437 | 0.560  | 13.354 | 26.065 | 1.00 | 0.00 |
| H      |      |    |     |     |        |        |        |      |      |
| HETATM | 6774 | C3 | PRP | 437 | -0.712 | 13.660 | 28.934 | 1.00 | 0.00 |
| C      |      |    |     |     |        |        |        |      |      |
| HETATM | 6775 | H6 | PRP | 437 | -1.441 | 14.303 | 28.440 | 1.00 | 0.00 |
| H      |      |    |     |     |        |        |        |      |      |

|        |      |    |     |     |        |        |        |      |      |
|--------|------|----|-----|-----|--------|--------|--------|------|------|
| HETATM | 6776 | H7 | PRP | 437 | -1.093 | 12.871 | 29.582 | 1.00 | 0.00 |
| H      |      |    |     |     |        |        |        |      |      |
| HETATM | 6777 | H8 | PRP | 437 | 0.035  | 14.246 | 29.469 | 1.00 | 0.00 |
| H      |      |    |     |     |        |        |        |      |      |
| HETATM | 6778 | O1 | PRP | 438 | 14.151 | 1.903  | 34.146 | 1.00 | 0.00 |
| O      |      |    |     |     |        |        |        |      |      |
| HETATM | 6779 | H1 | PRP | 438 | 13.468 | 2.486  | 34.483 | 1.00 | 0.00 |
| H      |      |    |     |     |        |        |        |      |      |
| HETATM | 6780 | C1 | PRP | 438 | 13.616 | 1.571  | 32.876 | 1.00 | 0.00 |
| C      |      |    |     |     |        |        |        |      |      |
| HETATM | 6781 | H2 | PRP | 438 | 14.126 | 2.085  | 32.061 | 1.00 | 0.00 |
| H      |      |    |     |     |        |        |        |      |      |
| HETATM | 6782 | H3 | PRP | 438 | 13.795 | 0.515  | 32.672 | 1.00 | 0.00 |
| H      |      |    |     |     |        |        |        |      |      |
| HETATM | 6783 | C2 | PRP | 438 | 12.155 | 1.748  | 32.748 | 1.00 | 0.00 |
| C      |      |    |     |     |        |        |        |      |      |
| HETATM | 6784 | H4 | PRP | 438 | 12.009 | 1.442  | 31.712 | 1.00 | 0.00 |
| H      |      |    |     |     |        |        |        |      |      |
| HETATM | 6785 | O2 | PRP | 438 | 11.822 | 3.123  | 32.958 | 1.00 | 0.00 |
| O      |      |    |     |     |        |        |        |      |      |
| HETATM | 6786 | H5 | PRP | 438 | 10.865 | 3.136  | 32.889 | 1.00 | 0.00 |
| H      |      |    |     |     |        |        |        |      |      |
| HETATM | 6787 | C3 | PRP | 438 | 11.399 | 0.934  | 33.767 | 1.00 | 0.00 |
| C      |      |    |     |     |        |        |        |      |      |
| HETATM | 6788 | H6 | PRP | 438 | 11.325 | 1.306  | 34.789 | 1.00 | 0.00 |
| H      |      |    |     |     |        |        |        |      |      |
| HETATM | 6789 | H7 | PRP | 438 | 10.371 | 0.866  | 33.410 | 1.00 | 0.00 |
| H      |      |    |     |     |        |        |        |      |      |
| HETATM | 6790 | H8 | PRP | 438 | 11.644 | -0.123 | 33.876 | 1.00 | 0.00 |
| H      |      |    |     |     |        |        |        |      |      |
| HETATM | 6791 | O1 | PRP | 439 | 17.634 | 0.747  | 31.859 | 1.00 | 0.00 |
| O      |      |    |     |     |        |        |        |      |      |
| HETATM | 6792 | H1 | PRP | 439 | 17.228 | 1.613  | 31.780 | 1.00 | 0.00 |
| H      |      |    |     |     |        |        |        |      |      |
| HETATM | 6793 | C1 | PRP | 439 | 17.275 | 0.127  | 33.068 | 1.00 | 0.00 |
| C      |      |    |     |     |        |        |        |      |      |
| HETATM | 6794 | H2 | PRP | 439 | 16.214 | -0.124 | 33.062 | 1.00 | 0.00 |
| H      |      |    |     |     |        |        |        |      |      |
| HETATM | 6795 | H3 | PRP | 439 | 17.748 | -0.854 | 33.106 | 1.00 | 0.00 |
| H      |      |    |     |     |        |        |        |      |      |
| HETATM | 6796 | C2 | PRP | 439 | 17.402 | 0.838  | 34.405 | 1.00 | 0.00 |
| C      |      |    |     |     |        |        |        |      |      |
| HETATM | 6797 | H4 | PRP | 439 | 16.848 | 0.286  | 35.164 | 1.00 | 0.00 |
| H      |      |    |     |     |        |        |        |      |      |
| HETATM | 6798 | O2 | PRP | 439 | 16.828 | 2.155  | 34.347 | 1.00 | 0.00 |
| O      |      |    |     |     |        |        |        |      |      |
| HETATM | 6799 | H5 | PRP | 439 | 15.870 | 2.151  | 34.278 | 1.00 | 0.00 |
| H      |      |    |     |     |        |        |        |      |      |
| HETATM | 6800 | C3 | PRP | 439 | 18.885 | 0.973  | 34.718 | 1.00 | 0.00 |
| C      |      |    |     |     |        |        |        |      |      |
| HETATM | 6801 | H6 | PRP | 439 | 19.341 | -0.016 | 34.755 | 1.00 | 0.00 |
| H      |      |    |     |     |        |        |        |      |      |
| HETATM | 6802 | H7 | PRP | 439 | 19.501 | 1.556  | 34.032 | 1.00 | 0.00 |
| H      |      |    |     |     |        |        |        |      |      |
| HETATM | 6803 | H8 | PRP | 439 | 19.027 | 1.441  | 35.692 | 1.00 | 0.00 |
| H      |      |    |     |     |        |        |        |      |      |

|        |      |    |     |     |        |        |        |      |      |
|--------|------|----|-----|-----|--------|--------|--------|------|------|
| HETATM | 6804 | O1 | PRP | 440 | 0.979  | 6.997  | 30.503 | 1.00 | 0.00 |
| O      |      |    |     |     |        |        |        |      |      |
| HETATM | 6805 | H1 | PRP | 440 | 0.745  | 6.157  | 30.101 | 1.00 | 0.00 |
| H      |      |    |     |     |        |        |        |      |      |
| HETATM | 6806 | C1 | PRP | 440 | -0.149 | 7.757  | 30.937 | 1.00 | 0.00 |
| C      |      |    |     |     |        |        |        |      |      |
| HETATM | 6807 | H2 | PRP | 440 | -0.753 | 7.143  | 31.604 | 1.00 | 0.00 |
| H      |      |    |     |     |        |        |        |      |      |
| HETATM | 6808 | H3 | PRP | 440 | 0.174  | 8.694  | 31.390 | 1.00 | 0.00 |
| H      |      |    |     |     |        |        |        |      |      |
| HETATM | 6809 | C2 | PRP | 440 | -0.982 | 8.085  | 29.646 | 1.00 | 0.00 |
| C      |      |    |     |     |        |        |        |      |      |
| HETATM | 6810 | H4 | PRP | 440 | -1.446 | 7.183  | 29.247 | 1.00 | 0.00 |
| H      |      |    |     |     |        |        |        |      |      |
| HETATM | 6811 | O2 | PRP | 440 | -0.129 | 8.569  | 28.676 | 1.00 | 0.00 |
| O      |      |    |     |     |        |        |        |      |      |
| HETATM | 6812 | H5 | PRP | 440 | 0.745  | 8.278  | 28.947 | 1.00 | 0.00 |
| H      |      |    |     |     |        |        |        |      |      |
| HETATM | 6813 | C3 | PRP | 440 | -2.152 | 9.044  | 29.969 | 1.00 | 0.00 |
| C      |      |    |     |     |        |        |        |      |      |
| HETATM | 6814 | H6 | PRP | 440 | -2.734 | 9.117  | 29.050 | 1.00 | 0.00 |
| H      |      |    |     |     |        |        |        |      |      |
| HETATM | 6815 | H7 | PRP | 440 | -2.791 | 8.631  | 30.749 | 1.00 | 0.00 |
| H      |      |    |     |     |        |        |        |      |      |
| HETATM | 6816 | H8 | PRP | 440 | -1.757 | 10.043 | 30.151 | 1.00 | 0.00 |
| H      |      |    |     |     |        |        |        |      |      |
| HETATM | 6817 | O1 | PRP | 441 | 0.368  | 18.259 | 32.191 | 1.00 | 0.00 |
| O      |      |    |     |     |        |        |        |      |      |
| HETATM | 6818 | H1 | PRP | 441 | -0.031 | 17.719 | 32.877 | 1.00 | 0.00 |
| H      |      |    |     |     |        |        |        |      |      |
| HETATM | 6819 | C1 | PRP | 441 | 1.558  | 17.597 | 31.922 | 1.00 | 0.00 |
| C      |      |    |     |     |        |        |        |      |      |
| HETATM | 6820 | H2 | PRP | 441 | 2.333  | 18.058 | 32.534 | 1.00 | 0.00 |
| H      |      |    |     |     |        |        |        |      |      |
| HETATM | 6821 | H3 | PRP | 441 | 1.500  | 16.523 | 32.098 | 1.00 | 0.00 |
| H      |      |    |     |     |        |        |        |      |      |
| HETATM | 6822 | C2 | PRP | 441 | 1.896  | 17.866 | 30.447 | 1.00 | 0.00 |
| C      |      |    |     |     |        |        |        |      |      |
| HETATM | 6823 | H4 | PRP | 441 | 2.917  | 17.648 | 30.137 | 1.00 | 0.00 |
| H      |      |    |     |     |        |        |        |      |      |
| HETATM | 6824 | O2 | PRP | 441 | 1.487  | 19.221 | 30.025 | 1.00 | 0.00 |
| O      |      |    |     |     |        |        |        |      |      |
| HETATM | 6825 | H5 | PRP | 441 | 1.107  | 19.701 | 30.765 | 1.00 | 0.00 |
| H      |      |    |     |     |        |        |        |      |      |
| HETATM | 6826 | C3 | PRP | 441 | 1.130  | 16.960 | 29.558 | 1.00 | 0.00 |
| C      |      |    |     |     |        |        |        |      |      |
| HETATM | 6827 | H6 | PRP | 441 | 1.559  | 15.970 | 29.714 | 1.00 | 0.00 |
| H      |      |    |     |     |        |        |        |      |      |
| HETATM | 6828 | H7 | PRP | 441 | 0.091  | 16.965 | 29.886 | 1.00 | 0.00 |
| H      |      |    |     |     |        |        |        |      |      |
| HETATM | 6829 | H8 | PRP | 441 | 1.167  | 17.367 | 28.547 | 1.00 | 0.00 |
| H      |      |    |     |     |        |        |        |      |      |
| HETATM | 6830 | O1 | PRP | 442 | 14.630 | 6.417  | 20.888 | 1.00 | 0.00 |
| O      |      |    |     |     |        |        |        |      |      |
| HETATM | 6831 | H1 | PRP | 442 | 15.170 | 5.625  | 20.834 | 1.00 | 0.00 |
| H      |      |    |     |     |        |        |        |      |      |

|        |      |    |     |     |        |       |        |      |      |
|--------|------|----|-----|-----|--------|-------|--------|------|------|
| HETATM | 6832 | C1 | PRP | 442 | 15.378 | 7.349 | 21.710 | 1.00 | 0.00 |
| C      |      |    |     |     |        |       |        |      |      |
| HETATM | 6833 | H2 | PRP | 442 | 14.800 | 8.271 | 21.655 | 1.00 | 0.00 |
| H      |      |    |     |     |        |       |        |      |      |
| HETATM | 6834 | H3 | PRP | 442 | 15.543 | 6.938 | 22.706 | 1.00 | 0.00 |
| H      |      |    |     |     |        |       |        |      |      |
| HETATM | 6835 | C2 | PRP | 442 | 16.695 | 7.631 | 21.175 | 1.00 | 0.00 |
| C      |      |    |     |     |        |       |        |      |      |
| HETATM | 6836 | H4 | PRP | 442 | 16.581 | 7.908 | 20.127 | 1.00 | 0.00 |
| H      |      |    |     |     |        |       |        |      |      |
| HETATM | 6837 | O2 | PRP | 442 | 17.478 | 6.514 | 21.273 | 1.00 | 0.00 |
| O      |      |    |     |     |        |       |        |      |      |
| HETATM | 6838 | H5 | PRP | 442 | 17.041 | 5.943 | 20.638 | 1.00 | 0.00 |
| H      |      |    |     |     |        |       |        |      |      |
| HETATM | 6839 | C3 | PRP | 442 | 17.479 | 8.653 | 21.976 | 1.00 | 0.00 |
| C      |      |    |     |     |        |       |        |      |      |
| HETATM | 6840 | H6 | PRP | 442 | 16.899 | 9.560 | 21.804 | 1.00 | 0.00 |
| H      |      |    |     |     |        |       |        |      |      |
| HETATM | 6841 | H7 | PRP | 442 | 17.403 | 8.550 | 23.059 | 1.00 | 0.00 |
| H      |      |    |     |     |        |       |        |      |      |
| HETATM | 6842 | H8 | PRP | 442 | 18.492 | 8.704 | 21.577 | 1.00 | 0.00 |
| H      |      |    |     |     |        |       |        |      |      |
| HETATM | 6843 | O1 | PRP | 443 | -5.567 | 3.594 | 34.260 | 1.00 | 0.00 |
| O      |      |    |     |     |        |       |        |      |      |
| HETATM | 6844 | H1 | PRP | 443 | -5.499 | 2.678 | 34.539 | 1.00 | 0.00 |
| H      |      |    |     |     |        |       |        |      |      |
| HETATM | 6845 | C1 | PRP | 443 | -4.411 | 3.712 | 33.497 | 1.00 | 0.00 |
| C      |      |    |     |     |        |       |        |      |      |
| HETATM | 6846 | H2 | PRP | 443 | -4.431 | 2.992 | 32.680 | 1.00 | 0.00 |
| H      |      |    |     |     |        |       |        |      |      |
| HETATM | 6847 | H3 | PRP | 443 | -4.473 | 4.637 | 32.924 | 1.00 | 0.00 |
| H      |      |    |     |     |        |       |        |      |      |
| HETATM | 6848 | C2 | PRP | 443 | -3.081 | 3.705 | 34.314 | 1.00 | 0.00 |
| C      |      |    |     |     |        |       |        |      |      |
| HETATM | 6849 | H4 | PRP | 443 | -2.821 | 2.769 | 34.808 | 1.00 | 0.00 |
| H      |      |    |     |     |        |       |        |      |      |
| HETATM | 6850 | O2 | PRP | 443 | -3.205 | 4.729 | 35.340 | 1.00 | 0.00 |
| O      |      |    |     |     |        |       |        |      |      |
| HETATM | 6851 | H5 | PRP | 443 | -3.212 | 5.560 | 34.859 | 1.00 | 0.00 |
| H      |      |    |     |     |        |       |        |      |      |
| HETATM | 6852 | C3 | PRP | 443 | -1.941 | 4.142 | 33.407 | 1.00 | 0.00 |
| C      |      |    |     |     |        |       |        |      |      |
| HETATM | 6853 | H6 | PRP | 443 | -1.068 | 4.503 | 33.951 | 1.00 | 0.00 |
| H      |      |    |     |     |        |       |        |      |      |
| HETATM | 6854 | H7 | PRP | 443 | -1.545 | 3.353 | 32.767 | 1.00 | 0.00 |
| H      |      |    |     |     |        |       |        |      |      |
| HETATM | 6855 | H8 | PRP | 443 | -2.303 | 4.955 | 32.778 | 1.00 | 0.00 |
| H      |      |    |     |     |        |       |        |      |      |
| HETATM | 6856 | O1 | PRP | 444 | -6.142 | 4.822 | 4.777  | 1.00 | 0.00 |
| O      |      |    |     |     |        |       |        |      |      |
| HETATM | 6857 | H1 | PRP | 444 | -6.231 | 3.897 | 5.016  | 1.00 | 0.00 |
| H      |      |    |     |     |        |       |        |      |      |
| HETATM | 6858 | C1 | PRP | 444 | -7.097 | 5.453 | 5.492  | 1.00 | 0.00 |
| C      |      |    |     |     |        |       |        |      |      |
| HETATM | 6859 | H2 | PRP | 444 | -7.187 | 6.507 | 5.229  | 1.00 | 0.00 |
| H      |      |    |     |     |        |       |        |      |      |



|        |      |    |     |     |        |        |        |      |      |
|--------|------|----|-----|-----|--------|--------|--------|------|------|
| HETATM | 6860 | H3 | PRP | 444 | -8.014 | 4.916  | 5.246  | 1.00 | 0.00 |
| H      |      |    |     |     |        |        |        |      |      |
| HETATM | 6861 | C2 | PRP | 444 | -6.972 | 5.365  | 7.019  | 1.00 | 0.00 |
| C      |      |    |     |     |        |        |        |      |      |
| HETATM | 6862 | H4 | PRP | 444 | -6.042 | 5.794  | 7.390  | 1.00 | 0.00 |
| H      |      |    |     |     |        |        |        |      |      |
| HETATM | 6863 | O2 | PRP | 444 | -7.071 | 3.992  | 7.460  | 1.00 | 0.00 |
| O      |      |    |     |     |        |        |        |      |      |
| HETATM | 6864 | H5 | PRP | 444 | -6.298 | 3.718  | 7.960  | 1.00 | 0.00 |
| H      |      |    |     |     |        |        |        |      |      |
| HETATM | 6865 | C3 | PRP | 444 | -8.177 | 6.126  | 7.657  | 1.00 | 0.00 |
| C      |      |    |     |     |        |        |        |      |      |
| HETATM | 6866 | H6 | PRP | 444 | -9.062 | 5.497  | 7.759  | 1.00 | 0.00 |
| H      |      |    |     |     |        |        |        |      |      |
| HETATM | 6867 | H7 | PRP | 444 | -7.791 | 6.447  | 8.625  | 1.00 | 0.00 |
| H      |      |    |     |     |        |        |        |      |      |
| HETATM | 6868 | H8 | PRP | 444 | -8.384 | 7.043  | 7.106  | 1.00 | 0.00 |
| H      |      |    |     |     |        |        |        |      |      |
| HETATM | 6869 | O1 | PRP | 445 | 7.741  | 9.111  | 30.248 | 1.00 | 0.00 |
| O      |      |    |     |     |        |        |        |      |      |
| HETATM | 6870 | H1 | PRP | 445 | 7.945  | 8.723  | 29.393 | 1.00 | 0.00 |
| H      |      |    |     |     |        |        |        |      |      |
| HETATM | 6871 | C1 | PRP | 445 | 7.583  | 10.449 | 30.116 | 1.00 | 0.00 |
| C      |      |    |     |     |        |        |        |      |      |
| HETATM | 6872 | H2 | PRP | 445 | 7.488  | 10.768 | 29.079 | 1.00 | 0.00 |
| H      |      |    |     |     |        |        |        |      |      |
| HETATM | 6873 | H3 | PRP | 445 | 6.759  | 10.784 | 30.746 | 1.00 | 0.00 |
| H      |      |    |     |     |        |        |        |      |      |
| HETATM | 6874 | C2 | PRP | 445 | 8.879  | 11.199 | 30.670 | 1.00 | 0.00 |
| C      |      |    |     |     |        |        |        |      |      |
| HETATM | 6875 | H4 | PRP | 445 | 8.619  | 12.257 | 30.705 | 1.00 | 0.00 |
| H      |      |    |     |     |        |        |        |      |      |
| HETATM | 6876 | O2 | PRP | 445 | 10.045 | 10.961 | 29.830 | 1.00 | 0.00 |
| O      |      |    |     |     |        |        |        |      |      |
| HETATM | 6877 | H5 | PRP | 445 | 9.933  | 10.278 | 29.165 | 1.00 | 0.00 |
| H      |      |    |     |     |        |        |        |      |      |
| HETATM | 6878 | C3 | PRP | 445 | 9.305  | 10.865 | 32.133 | 1.00 | 0.00 |
| C      |      |    |     |     |        |        |        |      |      |
| HETATM | 6879 | H6 | PRP | 445 | 9.506  | 9.812  | 32.331 | 1.00 | 0.00 |
| H      |      |    |     |     |        |        |        |      |      |
| HETATM | 6880 | H7 | PRP | 445 | 10.097 | 11.511 | 32.512 | 1.00 | 0.00 |
| H      |      |    |     |     |        |        |        |      |      |
| HETATM | 6881 | H8 | PRP | 445 | 8.492  | 11.160 | 32.796 | 1.00 | 0.00 |
| H      |      |    |     |     |        |        |        |      |      |
| HETATM | 6882 | O1 | PRP | 446 | 15.095 | -1.182 | 19.040 | 1.00 | 0.00 |
| O      |      |    |     |     |        |        |        |      |      |
| HETATM | 6883 | H1 | PRP | 446 | 14.140 | -1.150 | 19.135 | 1.00 | 0.00 |
| H      |      |    |     |     |        |        |        |      |      |
| HETATM | 6884 | C1 | PRP | 446 | 15.486 | -2.502 | 19.197 | 1.00 | 0.00 |
| C      |      |    |     |     |        |        |        |      |      |
| HETATM | 6885 | H2 | PRP | 446 | 15.243 | -3.061 | 18.293 | 1.00 | 0.00 |
| H      |      |    |     |     |        |        |        |      |      |
| HETATM | 6886 | H3 | PRP | 446 | 16.557 | -2.550 | 19.392 | 1.00 | 0.00 |
| H      |      |    |     |     |        |        |        |      |      |
| HETATM | 6887 | C2 | PRP | 446 | 14.867 | -3.083 | 20.442 | 1.00 | 0.00 |
| C      |      |    |     |     |        |        |        |      |      |

|        |      |    |     |     |        |        |        |      |      |
|--------|------|----|-----|-----|--------|--------|--------|------|------|
| HETATM | 6888 | H4 | PRP | 446 | 15.345 | -4.061 | 20.495 | 1.00 | 0.00 |
| H      |      |    |     |     |        |        |        |      |      |
| HETATM | 6889 | O2 | PRP | 446 | 13.543 | -3.270 | 20.148 | 1.00 | 0.00 |
| O      |      |    |     |     |        |        |        |      |      |
| HETATM | 6890 | H5 | PRP | 446 | 13.445 | -3.718 | 19.305 | 1.00 | 0.00 |
| H      |      |    |     |     |        |        |        |      |      |
| HETATM | 6891 | C3 | PRP | 446 | 15.125 | -2.254 | 21.783 | 1.00 | 0.00 |
| C      |      |    |     |     |        |        |        |      |      |
| HETATM | 6892 | H6 | PRP | 446 | 14.724 | -1.244 | 21.692 | 1.00 | 0.00 |
| H      |      |    |     |     |        |        |        |      |      |
| HETATM | 6893 | H7 | PRP | 446 | 14.521 | -2.707 | 22.569 | 1.00 | 0.00 |
| H      |      |    |     |     |        |        |        |      |      |
| HETATM | 6894 | H8 | PRP | 446 | 16.183 | -2.175 | 22.030 | 1.00 | 0.00 |
| H      |      |    |     |     |        |        |        |      |      |
| HETATM | 6895 | O1 | PRP | 447 | 5.189  | 15.629 | 16.325 | 1.00 | 0.00 |
| O      |      |    |     |     |        |        |        |      |      |
| HETATM | 6896 | H1 | PRP | 447 | 4.475  | 15.730 | 16.958 | 1.00 | 0.00 |
| H      |      |    |     |     |        |        |        |      |      |
| HETATM | 6897 | C1 | PRP | 447 | 5.376  | 14.184 | 16.312 | 1.00 | 0.00 |
| C      |      |    |     |     |        |        |        |      |      |
| HETATM | 6898 | H2 | PRP | 447 | 4.505  | 13.744 | 15.826 | 1.00 | 0.00 |
| H      |      |    |     |     |        |        |        |      |      |
| HETATM | 6899 | H3 | PRP | 447 | 6.266  | 13.858 | 15.773 | 1.00 | 0.00 |
| H      |      |    |     |     |        |        |        |      |      |
| HETATM | 6900 | C2 | PRP | 447 | 5.236  | 13.677 | 17.733 | 1.00 | 0.00 |
| C      |      |    |     |     |        |        |        |      |      |
| HETATM | 6901 | H4 | PRP | 447 | 5.261  | 12.612 | 17.502 | 1.00 | 0.00 |
| H      |      |    |     |     |        |        |        |      |      |
| HETATM | 6902 | O2 | PRP | 447 | 3.928  | 13.945 | 18.259 | 1.00 | 0.00 |
| O      |      |    |     |     |        |        |        |      |      |
| HETATM | 6903 | H5 | PRP | 447 | 3.776  | 13.558 | 19.124 | 1.00 | 0.00 |
| H      |      |    |     |     |        |        |        |      |      |
| HETATM | 6904 | C3 | PRP | 447 | 6.224  | 14.058 | 18.768 | 1.00 | 0.00 |
| C      |      |    |     |     |        |        |        |      |      |
| HETATM | 6905 | H6 | PRP | 447 | 5.968  | 15.068 | 19.086 | 1.00 | 0.00 |
| H      |      |    |     |     |        |        |        |      |      |
| HETATM | 6906 | H7 | PRP | 447 | 6.185  | 13.378 | 19.619 | 1.00 | 0.00 |
| H      |      |    |     |     |        |        |        |      |      |
| HETATM | 6907 | H8 | PRP | 447 | 7.226  | 13.995 | 18.343 | 1.00 | 0.00 |
| H      |      |    |     |     |        |        |        |      |      |
| HETATM | 6908 | O1 | PRP | 448 | -5.519 | 14.597 | 3.551  | 1.00 | 0.00 |
| O      |      |    |     |     |        |        |        |      |      |
| HETATM | 6909 | H1 | PRP | 448 | -5.752 | 15.522 | 3.443  | 1.00 | 0.00 |
| H      |      |    |     |     |        |        |        |      |      |
| HETATM | 6910 | C1 | PRP | 448 | -4.389 | 14.558 | 4.401  | 1.00 | 0.00 |
| C      |      |    |     |     |        |        |        |      |      |
| HETATM | 6911 | H2 | PRP | 448 | -3.630 | 15.070 | 3.809  | 1.00 | 0.00 |
| H      |      |    |     |     |        |        |        |      |      |
| HETATM | 6912 | H3 | PRP | 448 | -4.443 | 15.045 | 5.375  | 1.00 | 0.00 |
| H      |      |    |     |     |        |        |        |      |      |
| HETATM | 6913 | C2 | PRP | 448 | -3.860 | 13.134 | 4.496  | 1.00 | 0.00 |
| C      |      |    |     |     |        |        |        |      |      |
| HETATM | 6914 | H4 | PRP | 448 | -2.817 | 13.119 | 4.811  | 1.00 | 0.00 |
| H      |      |    |     |     |        |        |        |      |      |
| HETATM | 6915 | O2 | PRP | 448 | -4.103 | 12.459 | 3.333  | 1.00 | 0.00 |
| O      |      |    |     |     |        |        |        |      |      |

|        |      |    |     |     |        |        |        |      |      |
|--------|------|----|-----|-----|--------|--------|--------|------|------|
| HETATM | 6916 | H5 | PRP | 448 | -4.867 | 12.943 | 3.012  | 1.00 | 0.00 |
| H      |      |    |     |     |        |        |        |      |      |
| HETATM | 6917 | C3 | PRP | 448 | -4.684 | 12.301 | 5.560  | 1.00 | 0.00 |
| C      |      |    |     |     |        |        |        |      |      |
| HETATM | 6918 | H6 | PRP | 448 | -4.655 | 12.767 | 6.545  | 1.00 | 0.00 |
| H      |      |    |     |     |        |        |        |      |      |
| HETATM | 6919 | H7 | PRP | 448 | -5.734 | 12.429 | 5.294  | 1.00 | 0.00 |
| H      |      |    |     |     |        |        |        |      |      |
| HETATM | 6920 | H8 | PRP | 448 | -4.461 | 11.235 | 5.578  | 1.00 | 0.00 |
| H      |      |    |     |     |        |        |        |      |      |
| HETATM | 6921 | O1 | PRP | 449 | 7.866  | 4.280  | 23.567 | 1.00 | 0.00 |
| O      |      |    |     |     |        |        |        |      |      |
| HETATM | 6922 | H1 | PRP | 449 | 7.156  | 3.649  | 23.706 | 1.00 | 0.00 |
| H      |      |    |     |     |        |        |        |      |      |
| HETATM | 6923 | C1 | PRP | 449 | 7.482  | 5.324  | 22.770 | 1.00 | 0.00 |
| C      |      |    |     |     |        |        |        |      |      |
| HETATM | 6924 | H2 | PRP | 449 | 8.240  | 5.318  | 21.987 | 1.00 | 0.00 |
| H      |      |    |     |     |        |        |        |      |      |
| HETATM | 6925 | H3 | PRP | 449 | 6.615  | 5.146  | 22.134 | 1.00 | 0.00 |
| H      |      |    |     |     |        |        |        |      |      |
| HETATM | 6926 | C2 | PRP | 449 | 7.528  | 6.575  | 23.615 | 1.00 | 0.00 |
| C      |      |    |     |     |        |        |        |      |      |
| HETATM | 6927 | H4 | PRP | 449 | 8.330  | 6.566  | 24.353 | 1.00 | 0.00 |
| H      |      |    |     |     |        |        |        |      |      |
| HETATM | 6928 | O2 | PRP | 449 | 6.337  | 6.700  | 24.258 | 1.00 | 0.00 |
| O      |      |    |     |     |        |        |        |      |      |
| HETATM | 6929 | H5 | PRP | 449 | 6.147  | 5.917  | 24.780 | 1.00 | 0.00 |
| H      |      |    |     |     |        |        |        |      |      |
| HETATM | 6930 | C3 | PRP | 449 | 7.731  | 7.729  | 22.630 | 1.00 | 0.00 |
| C      |      |    |     |     |        |        |        |      |      |
| HETATM | 6931 | H6 | PRP | 449 | 8.748  | 7.693  | 22.240 | 1.00 | 0.00 |
| H      |      |    |     |     |        |        |        |      |      |
| HETATM | 6932 | H7 | PRP | 449 | 7.019  | 7.796  | 21.807 | 1.00 | 0.00 |
| H      |      |    |     |     |        |        |        |      |      |
| HETATM | 6933 | H8 | PRP | 449 | 7.607  | 8.632  | 23.228 | 1.00 | 0.00 |
| H      |      |    |     |     |        |        |        |      |      |
| HETATM | 6934 | O1 | PRP | 450 | 7.441  | 6.840  | 19.499 | 1.00 | 0.00 |
| O      |      |    |     |     |        |        |        |      |      |
| HETATM | 6935 | H1 | PRP | 450 | 7.248  | 7.779  | 19.456 | 1.00 | 0.00 |
| H      |      |    |     |     |        |        |        |      |      |
| HETATM | 6936 | C1 | PRP | 450 | 7.027  | 6.265  | 18.211 | 1.00 | 0.00 |
| C      |      |    |     |     |        |        |        |      |      |
| HETATM | 6937 | H2 | PRP | 450 | 6.098  | 6.555  | 17.719 | 1.00 | 0.00 |
| H      |      |    |     |     |        |        |        |      |      |
| HETATM | 6938 | H3 | PRP | 450 | 7.776  | 6.516  | 17.460 | 1.00 | 0.00 |
| H      |      |    |     |     |        |        |        |      |      |
| HETATM | 6939 | C2 | PRP | 450 | 7.005  | 4.704  | 18.371 | 1.00 | 0.00 |
| C      |      |    |     |     |        |        |        |      |      |
| HETATM | 6940 | H4 | PRP | 450 | 6.676  | 4.211  | 17.456 | 1.00 | 0.00 |
| H      |      |    |     |     |        |        |        |      |      |
| HETATM | 6941 | O2 | PRP | 450 | 6.184  | 4.320  | 19.433 | 1.00 | 0.00 |
| O      |      |    |     |     |        |        |        |      |      |
| HETATM | 6942 | H5 | PRP | 450 | 6.244  | 4.988  | 20.119 | 1.00 | 0.00 |
| H      |      |    |     |     |        |        |        |      |      |
| HETATM | 6943 | C3 | PRP | 450 | 8.390  | 4.142  | 18.656 | 1.00 | 0.00 |
| C      |      |    |     |     |        |        |        |      |      |

|        |      |    |     |     |        |        |        |      |      |
|--------|------|----|-----|-----|--------|--------|--------|------|------|
| HETATM | 6944 | H6 | PRP | 450 | 9.138  | 4.634  | 18.033 | 1.00 | 0.00 |
| H      |      |    |     |     |        |        |        |      |      |
| HETATM | 6945 | H7 | PRP | 450 | 8.718  | 4.200  | 19.693 | 1.00 | 0.00 |
| H      |      |    |     |     |        |        |        |      |      |
| HETATM | 6946 | H8 | PRP | 450 | 8.338  | 3.076  | 18.437 | 1.00 | 0.00 |
| H      |      |    |     |     |        |        |        |      |      |
| HETATM | 6947 | O1 | PRP | 451 | 12.122 | 27.370 | 47.161 | 1.00 | 0.00 |
| O      |      |    |     |     |        |        |        |      |      |
| HETATM | 6948 | H1 | PRP | 451 | 11.183 | 27.428 | 46.967 | 1.00 | 0.00 |
| H      |      |    |     |     |        |        |        |      |      |
| HETATM | 6949 | C1 | PRP | 451 | 12.919 | 26.958 | 46.052 | 1.00 | 0.00 |
| C      |      |    |     |     |        |        |        |      |      |
| HETATM | 6950 | H2 | PRP | 451 | 13.479 | 27.825 | 45.700 | 1.00 | 0.00 |
| H      |      |    |     |     |        |        |        |      |      |
| HETATM | 6951 | H3 | PRP | 451 | 13.606 | 26.175 | 46.372 | 1.00 | 0.00 |
| H      |      |    |     |     |        |        |        |      |      |
| HETATM | 6952 | C2 | PRP | 451 | 12.029 | 26.480 | 44.891 | 1.00 | 0.00 |
| C      |      |    |     |     |        |        |        |      |      |
| HETATM | 6953 | H4 | PRP | 451 | 12.705 | 26.267 | 44.063 | 1.00 | 0.00 |
| H      |      |    |     |     |        |        |        |      |      |
| HETATM | 6954 | O2 | PRP | 451 | 11.049 | 27.450 | 44.548 | 1.00 | 0.00 |
| O      |      |    |     |     |        |        |        |      |      |
| HETATM | 6955 | H5 | PRP | 451 | 11.509 | 28.068 | 43.975 | 1.00 | 0.00 |
| H      |      |    |     |     |        |        |        |      |      |
| HETATM | 6956 | C3 | PRP | 451 | 11.243 | 25.158 | 45.108 | 1.00 | 0.00 |
| C      |      |    |     |     |        |        |        |      |      |
| HETATM | 6957 | H6 | PRP | 451 | 10.586 | 25.066 | 44.243 | 1.00 | 0.00 |
| H      |      |    |     |     |        |        |        |      |      |
| HETATM | 6958 | H7 | PRP | 451 | 11.745 | 24.191 | 45.144 | 1.00 | 0.00 |
| H      |      |    |     |     |        |        |        |      |      |
| HETATM | 6959 | H8 | PRP | 451 | 10.684 | 25.223 | 46.041 | 1.00 | 0.00 |
| H      |      |    |     |     |        |        |        |      |      |
| HETATM | 6960 | O1 | PRP | 452 | 25.917 | 25.131 | 35.758 | 1.00 | 0.00 |
| O      |      |    |     |     |        |        |        |      |      |
| HETATM | 6961 | H1 | PRP | 452 | 26.360 | 24.429 | 35.276 | 1.00 | 0.00 |
| H      |      |    |     |     |        |        |        |      |      |
| HETATM | 6962 | C1 | PRP | 452 | 25.531 | 25.969 | 34.715 | 1.00 | 0.00 |
| C      |      |    |     |     |        |        |        |      |      |
| HETATM | 6963 | H2 | PRP | 452 | 24.923 | 26.806 | 35.058 | 1.00 | 0.00 |
| H      |      |    |     |     |        |        |        |      |      |
| HETATM | 6964 | H3 | PRP | 452 | 26.419 | 26.456 | 34.311 | 1.00 | 0.00 |
| H      |      |    |     |     |        |        |        |      |      |
| HETATM | 6965 | C2 | PRP | 452 | 24.880 | 25.184 | 33.601 | 1.00 | 0.00 |
| C      |      |    |     |     |        |        |        |      |      |
| HETATM | 6966 | H4 | PRP | 452 | 24.085 | 24.589 | 34.051 | 1.00 | 0.00 |
| H      |      |    |     |     |        |        |        |      |      |
| HETATM | 6967 | O2 | PRP | 452 | 25.746 | 24.199 | 33.038 | 1.00 | 0.00 |
| O      |      |    |     |     |        |        |        |      |      |
| HETATM | 6968 | H5 | PRP | 452 | 25.293 | 23.650 | 32.394 | 1.00 | 0.00 |
| H      |      |    |     |     |        |        |        |      |      |
| HETATM | 6969 | C3 | PRP | 452 | 24.348 | 26.071 | 32.454 | 1.00 | 0.00 |
| C      |      |    |     |     |        |        |        |      |      |
| HETATM | 6970 | H6 | PRP | 452 | 25.129 | 26.773 | 32.163 | 1.00 | 0.00 |
| H      |      |    |     |     |        |        |        |      |      |
| HETATM | 6971 | H7 | PRP | 452 | 23.917 | 25.479 | 31.647 | 1.00 | 0.00 |
| H      |      |    |     |     |        |        |        |      |      |

|        |      |    |     |     |        |        |        |      |      |
|--------|------|----|-----|-----|--------|--------|--------|------|------|
| HETATM | 6972 | H8 | PRP | 452 | 23.538 | 26.523 | 33.026 | 1.00 | 0.00 |
| H      |      |    |     |     |        |        |        |      |      |
| HETATM | 6973 | O1 | PRP | 453 | 9.545  | 27.973 | 51.561 | 1.00 | 0.00 |
| O      |      |    |     |     |        |        |        |      |      |
| HETATM | 6974 | H1 | PRP | 453 | 9.826  | 28.695 | 52.127 | 1.00 | 0.00 |
| H      |      |    |     |     |        |        |        |      |      |
| HETATM | 6975 | C1 | PRP | 453 | 9.200  | 26.816 | 52.224 | 1.00 | 0.00 |
| C      |      |    |     |     |        |        |        |      |      |
| HETATM | 6976 | H2 | PRP | 453 | 9.242  | 25.989 | 51.515 | 1.00 | 0.00 |
| H      |      |    |     |     |        |        |        |      |      |
| HETATM | 6977 | H3 | PRP | 453 | 9.971  | 26.768 | 52.993 | 1.00 | 0.00 |
| H      |      |    |     |     |        |        |        |      |      |
| HETATM | 6978 | C2 | PRP | 453 | 7.878  | 26.836 | 52.931 | 1.00 | 0.00 |
| C      |      |    |     |     |        |        |        |      |      |
| HETATM | 6979 | H4 | PRP | 453 | 8.033  | 25.984 | 53.592 | 1.00 | 0.00 |
| H      |      |    |     |     |        |        |        |      |      |
| HETATM | 6980 | O2 | PRP | 453 | 6.842  | 26.546 | 52.045 | 1.00 | 0.00 |
| O      |      |    |     |     |        |        |        |      |      |
| HETATM | 6981 | H5 | PRP | 453 | 7.010  | 26.663 | 51.108 | 1.00 | 0.00 |
| H      |      |    |     |     |        |        |        |      |      |
| HETATM | 6982 | C3 | PRP | 453 | 7.534  | 28.058 | 53.795 | 1.00 | 0.00 |
| C      |      |    |     |     |        |        |        |      |      |
| HETATM | 6983 | H6 | PRP | 453 | 7.660  | 28.975 | 53.219 | 1.00 | 0.00 |
| H      |      |    |     |     |        |        |        |      |      |
| HETATM | 6984 | H7 | PRP | 453 | 6.525  | 28.057 | 54.207 | 1.00 | 0.00 |
| H      |      |    |     |     |        |        |        |      |      |
| HETATM | 6985 | H8 | PRP | 453 | 8.225  | 28.078 | 54.637 | 1.00 | 0.00 |
| H      |      |    |     |     |        |        |        |      |      |
| HETATM | 6986 | O1 | PRP | 454 | 22.784 | 36.987 | 44.099 | 1.00 | 0.00 |
| O      |      |    |     |     |        |        |        |      |      |
| HETATM | 6987 | H1 | PRP | 454 | 22.545 | 37.290 | 44.979 | 1.00 | 0.00 |
| H      |      |    |     |     |        |        |        |      |      |
| HETATM | 6988 | C1 | PRP | 454 | 23.329 | 35.757 | 44.309 | 1.00 | 0.00 |
| C      |      |    |     |     |        |        |        |      |      |
| HETATM | 6989 | H2 | PRP | 454 | 22.962 | 35.111 | 43.511 | 1.00 | 0.00 |
| H      |      |    |     |     |        |        |        |      |      |
| HETATM | 6990 | H3 | PRP | 454 | 24.408 | 35.868 | 44.196 | 1.00 | 0.00 |
| H      |      |    |     |     |        |        |        |      |      |
| HETATM | 6991 | C2 | PRP | 454 | 23.078 | 35.369 | 45.762 | 1.00 | 0.00 |
| C      |      |    |     |     |        |        |        |      |      |
| HETATM | 6992 | H4 | PRP | 454 | 22.007 | 35.240 | 45.915 | 1.00 | 0.00 |
| H      |      |    |     |     |        |        |        |      |      |
| HETATM | 6993 | O2 | PRP | 454 | 23.576 | 36.490 | 46.537 | 1.00 | 0.00 |
| O      |      |    |     |     |        |        |        |      |      |
| HETATM | 6994 | H5 | PRP | 454 | 24.535 | 36.471 | 46.504 | 1.00 | 0.00 |
| H      |      |    |     |     |        |        |        |      |      |
| HETATM | 6995 | C3 | PRP | 454 | 23.833 | 34.068 | 46.080 | 1.00 | 0.00 |
| C      |      |    |     |     |        |        |        |      |      |
| HETATM | 6996 | H6 | PRP | 454 | 23.641 | 33.768 | 47.110 | 1.00 | 0.00 |
| H      |      |    |     |     |        |        |        |      |      |
| HETATM | 6997 | H7 | PRP | 454 | 23.542 | 33.292 | 45.372 | 1.00 | 0.00 |
| H      |      |    |     |     |        |        |        |      |      |
| HETATM | 6998 | H8 | PRP | 454 | 24.899 | 34.265 | 45.971 | 1.00 | 0.00 |
| H      |      |    |     |     |        |        |        |      |      |
| HETATM | 6999 | O1 | PRP | 455 | 29.027 | 37.437 | 34.984 | 1.00 | 0.00 |
| O      |      |    |     |     |        |        |        |      |      |

|        |      |    |     |     |        |        |        |      |      |
|--------|------|----|-----|-----|--------|--------|--------|------|------|
| HETATM | 7000 | H1 | PRP | 455 | 28.212 | 36.943 | 34.865 | 1.00 | 0.00 |
| H      |      |    |     |     |        |        |        |      |      |
| HETATM | 7001 | C1 | PRP | 455 | 29.939 | 36.472 | 35.498 | 1.00 | 0.00 |
| C      |      |    |     |     |        |        |        |      |      |
| HETATM | 7002 | H2 | PRP | 455 | 29.889 | 36.483 | 36.587 | 1.00 | 0.00 |
| H      |      |    |     |     |        |        |        |      |      |
| HETATM | 7003 | H3 | PRP | 455 | 29.626 | 35.456 | 35.258 | 1.00 | 0.00 |
| H      |      |    |     |     |        |        |        |      |      |
| HETATM | 7004 | C2 | PRP | 455 | 31.342 | 36.920 | 35.005 | 1.00 | 0.00 |
| C      |      |    |     |     |        |        |        |      |      |
| HETATM | 7005 | H4 | PRP | 455 | 31.402 | 38.000 | 35.132 | 1.00 | 0.00 |
| H      |      |    |     |     |        |        |        |      |      |
| HETATM | 7006 | O2 | PRP | 455 | 31.699 | 36.476 | 33.679 | 1.00 | 0.00 |
| O      |      |    |     |     |        |        |        |      |      |
| HETATM | 7007 | H5 | PRP | 455 | 31.061 | 36.932 | 33.125 | 1.00 | 0.00 |
| H      |      |    |     |     |        |        |        |      |      |
| HETATM | 7008 | C3 | PRP | 455 | 32.378 | 36.164 | 35.902 | 1.00 | 0.00 |
| C      |      |    |     |     |        |        |        |      |      |
| HETATM | 7009 | H6 | PRP | 455 | 32.271 | 36.514 | 36.929 | 1.00 | 0.00 |
| H      |      |    |     |     |        |        |        |      |      |
| HETATM | 7010 | H7 | PRP | 455 | 32.260 | 35.085 | 35.801 | 1.00 | 0.00 |
| H      |      |    |     |     |        |        |        |      |      |
| HETATM | 7011 | H8 | PRP | 455 | 33.409 | 36.401 | 35.638 | 1.00 | 0.00 |
| H      |      |    |     |     |        |        |        |      |      |
| HETATM | 7012 | O1 | PRP | 456 | 46.026 | 45.002 | 40.445 | 1.00 | 0.00 |
| O      |      |    |     |     |        |        |        |      |      |
| HETATM | 7013 | H1 | PRP | 456 | 46.790 | 45.367 | 40.898 | 1.00 | 0.00 |
| H      |      |    |     |     |        |        |        |      |      |
| HETATM | 7014 | C1 | PRP | 456 | 46.149 | 45.478 | 39.118 | 1.00 | 0.00 |
| C      |      |    |     |     |        |        |        |      |      |
| HETATM | 7015 | H2 | PRP | 456 | 46.429 | 46.531 | 39.139 | 1.00 | 0.00 |
| H      |      |    |     |     |        |        |        |      |      |
| HETATM | 7016 | H3 | PRP | 456 | 46.855 | 44.798 | 38.640 | 1.00 | 0.00 |
| H      |      |    |     |     |        |        |        |      |      |
| HETATM | 7017 | C2 | PRP | 456 | 44.793 | 45.359 | 38.371 | 1.00 | 0.00 |
| C      |      |    |     |     |        |        |        |      |      |
| HETATM | 7018 | H4 | PRP | 456 | 44.802 | 46.005 | 37.494 | 1.00 | 0.00 |
| H      |      |    |     |     |        |        |        |      |      |
| HETATM | 7019 | O2 | PRP | 456 | 43.727 | 45.893 | 39.140 | 1.00 | 0.00 |
| O      |      |    |     |     |        |        |        |      |      |
| HETATM | 7020 | H5 | PRP | 456 | 44.052 | 45.836 | 40.042 | 1.00 | 0.00 |
| H      |      |    |     |     |        |        |        |      |      |
| HETATM | 7021 | C3 | PRP | 456 | 44.488 | 43.871 | 37.978 | 1.00 | 0.00 |
| C      |      |    |     |     |        |        |        |      |      |
| HETATM | 7022 | H6 | PRP | 456 | 43.721 | 44.041 | 37.222 | 1.00 | 0.00 |
| H      |      |    |     |     |        |        |        |      |      |
| HETATM | 7023 | H7 | PRP | 456 | 45.326 | 43.521 | 37.376 | 1.00 | 0.00 |
| H      |      |    |     |     |        |        |        |      |      |
| HETATM | 7024 | H8 | PRP | 456 | 44.194 | 43.215 | 38.797 | 1.00 | 0.00 |
| H      |      |    |     |     |        |        |        |      |      |
| HETATM | 7025 | O1 | PRP | 457 | 36.878 | 57.593 | 41.938 | 1.00 | 0.00 |
| O      |      |    |     |     |        |        |        |      |      |
| HETATM | 7026 | H1 | PRP | 457 | 35.933 | 57.440 | 42.006 | 1.00 | 0.00 |
| H      |      |    |     |     |        |        |        |      |      |
| HETATM | 7027 | C1 | PRP | 457 | 37.495 | 57.471 | 43.227 | 1.00 | 0.00 |
| C      |      |    |     |     |        |        |        |      |      |

|        |      |    |     |     |        |        |        |      |      |
|--------|------|----|-----|-----|--------|--------|--------|------|------|
| HETATM | 7028 | H2 | PRP | 457 | 38.422 | 58.043 | 43.229 | 1.00 | 0.00 |
| H      |      |    |     |     |        |        |        |      |      |
| HETATM | 7029 | H3 | PRP | 457 | 37.044 | 58.077 | 44.012 | 1.00 | 0.00 |
| H      |      |    |     |     |        |        |        |      |      |
| HETATM | 7030 | C2 | PRP | 457 | 37.687 | 55.993 | 43.622 | 1.00 | 0.00 |
| C      |      |    |     |     |        |        |        |      |      |
| HETATM | 7031 | H4 | PRP | 457 | 38.475 | 55.599 | 42.980 | 1.00 | 0.00 |
| H      |      |    |     |     |        |        |        |      |      |
| HETATM | 7032 | O2 | PRP | 457 | 36.476 | 55.220 | 43.657 | 1.00 | 0.00 |
| O      |      |    |     |     |        |        |        |      |      |
| HETATM | 7033 | H5 | PRP | 457 | 35.937 | 55.762 | 43.075 | 1.00 | 0.00 |
| H      |      |    |     |     |        |        |        |      |      |
| HETATM | 7034 | C3 | PRP | 457 | 38.216 | 55.955 | 45.048 | 1.00 | 0.00 |
| C      |      |    |     |     |        |        |        |      |      |
| HETATM | 7035 | H6 | PRP | 457 | 38.513 | 54.938 | 45.304 | 1.00 | 0.00 |
| H      |      |    |     |     |        |        |        |      |      |
| HETATM | 7036 | H7 | PRP | 457 | 39.061 | 56.644 | 45.060 | 1.00 | 0.00 |
| H      |      |    |     |     |        |        |        |      |      |
| HETATM | 7037 | H8 | PRP | 457 | 37.435 | 56.301 | 45.724 | 1.00 | 0.00 |
| H      |      |    |     |     |        |        |        |      |      |
| HETATM | 7038 | O1 | PRP | 458 | 5.580  | 22.444 | 43.977 | 1.00 | 0.00 |
| O      |      |    |     |     |        |        |        |      |      |
| HETATM | 7039 | H1 | PRP | 458 | 4.922  | 21.746 | 44.015 | 1.00 | 0.00 |
| H      |      |    |     |     |        |        |        |      |      |
| HETATM | 7040 | C1 | PRP | 458 | 5.501  | 23.065 | 45.228 | 1.00 | 0.00 |
| C      |      |    |     |     |        |        |        |      |      |
| HETATM | 7041 | H2 | PRP | 458 | 4.542  | 22.988 | 45.740 | 1.00 | 0.00 |
| H      |      |    |     |     |        |        |        |      |      |
| HETATM | 7042 | H3 | PRP | 458 | 6.166  | 22.540 | 45.914 | 1.00 | 0.00 |
| H      |      |    |     |     |        |        |        |      |      |
| HETATM | 7043 | C2 | PRP | 458 | 6.073  | 24.520 | 45.052 | 1.00 | 0.00 |
| C      |      |    |     |     |        |        |        |      |      |
| HETATM | 7044 | H4 | PRP | 458 | 5.899  | 25.072 | 45.976 | 1.00 | 0.00 |
| H      |      |    |     |     |        |        |        |      |      |
| HETATM | 7045 | O2 | PRP | 458 | 5.434  | 25.269 | 44.058 | 1.00 | 0.00 |
| O      |      |    |     |     |        |        |        |      |      |
| HETATM | 7046 | H5 | PRP | 458 | 5.252  | 24.686 | 43.318 | 1.00 | 0.00 |
| H      |      |    |     |     |        |        |        |      |      |
| HETATM | 7047 | C3 | PRP | 458 | 7.568  | 24.467 | 44.744 | 1.00 | 0.00 |
| C      |      |    |     |     |        |        |        |      |      |
| HETATM | 7048 | H6 | PRP | 458 | 7.694  | 24.136 | 43.713 | 1.00 | 0.00 |
| H      |      |    |     |     |        |        |        |      |      |
| HETATM | 7049 | H7 | PRP | 458 | 7.933  | 25.493 | 44.697 | 1.00 | 0.00 |
| H      |      |    |     |     |        |        |        |      |      |
| HETATM | 7050 | H8 | PRP | 458 | 8.155  | 23.883 | 45.453 | 1.00 | 0.00 |
| H      |      |    |     |     |        |        |        |      |      |
| HETATM | 7051 | O1 | PRP | 459 | 14.883 | 19.831 | 42.090 | 1.00 | 0.00 |
| O      |      |    |     |     |        |        |        |      |      |
| HETATM | 7052 | H1 | PRP | 459 | 14.571 | 18.935 | 42.235 | 1.00 | 0.00 |
| H      |      |    |     |     |        |        |        |      |      |
| HETATM | 7053 | C1 | PRP | 459 | 14.736 | 20.443 | 43.316 | 1.00 | 0.00 |
| C      |      |    |     |     |        |        |        |      |      |
| HETATM | 7054 | H2 | PRP | 459 | 13.703 | 20.780 | 43.225 | 1.00 | 0.00 |
| H      |      |    |     |     |        |        |        |      |      |
| HETATM | 7055 | H3 | PRP | 459 | 14.927 | 19.652 | 44.041 | 1.00 | 0.00 |
| H      |      |    |     |     |        |        |        |      |      |

|        |      |    |     |     |        |        |        |      |      |
|--------|------|----|-----|-----|--------|--------|--------|------|------|
| HETATM | 7056 | C2 | PRP | 459 | 15.635 | 21.660 | 43.705 | 1.00 | 0.00 |
| C      |      |    |     |     |        |        |        |      |      |
| HETATM | 7057 | H4 | PRP | 459 | 15.416 | 21.977 | 44.725 | 1.00 | 0.00 |
| H      |      |    |     |     |        |        |        |      |      |
| HETATM | 7058 | O2 | PRP | 459 | 15.302 | 22.715 | 42.837 | 1.00 | 0.00 |
| O      |      |    |     |     |        |        |        |      |      |
| HETATM | 7059 | H5 | PRP | 459 | 15.071 | 22.267 | 42.020 | 1.00 | 0.00 |
| H      |      |    |     |     |        |        |        |      |      |
| HETATM | 7060 | C3 | PRP | 459 | 17.059 | 21.289 | 43.724 | 1.00 | 0.00 |
| C      |      |    |     |     |        |        |        |      |      |
| HETATM | 7061 | H6 | PRP | 459 | 17.347 | 20.405 | 44.292 | 1.00 | 0.00 |
| H      |      |    |     |     |        |        |        |      |      |
| HETATM | 7062 | H7 | PRP | 459 | 17.321 | 21.071 | 42.689 | 1.00 | 0.00 |
| H      |      |    |     |     |        |        |        |      |      |
| HETATM | 7063 | H8 | PRP | 459 | 17.649 | 22.163 | 44.001 | 1.00 | 0.00 |
| H      |      |    |     |     |        |        |        |      |      |
| HETATM | 7064 | O1 | PRP | 460 | 27.476 | 25.152 | 43.678 | 1.00 | 0.00 |
| O      |      |    |     |     |        |        |        |      |      |
| HETATM | 7065 | H1 | PRP | 460 | 27.800 | 24.429 | 43.136 | 1.00 | 0.00 |
| H      |      |    |     |     |        |        |        |      |      |
| HETATM | 7066 | C1 | PRP | 460 | 26.783 | 26.081 | 42.814 | 1.00 | 0.00 |
| C      |      |    |     |     |        |        |        |      |      |
| HETATM | 7067 | H2 | PRP | 460 | 27.437 | 26.572 | 42.094 | 1.00 | 0.00 |
| H      |      |    |     |     |        |        |        |      |      |
| HETATM | 7068 | H3 | PRP | 460 | 25.917 | 25.618 | 42.341 | 1.00 | 0.00 |
| H      |      |    |     |     |        |        |        |      |      |
| HETATM | 7069 | C2 | PRP | 460 | 26.124 | 27.205 | 43.649 | 1.00 | 0.00 |
| C      |      |    |     |     |        |        |        |      |      |
| HETATM | 7070 | H4 | PRP | 460 | 25.746 | 27.978 | 42.980 | 1.00 | 0.00 |
| H      |      |    |     |     |        |        |        |      |      |
| HETATM | 7071 | O2 | PRP | 460 | 27.230 | 27.668 | 44.514 | 1.00 | 0.00 |
| O      |      |    |     |     |        |        |        |      |      |
| HETATM | 7072 | H5 | PRP | 460 | 27.583 | 26.881 | 44.935 | 1.00 | 0.00 |
| H      |      |    |     |     |        |        |        |      |      |
| HETATM | 7073 | C3 | PRP | 460 | 24.981 | 26.640 | 44.438 | 1.00 | 0.00 |
| C      |      |    |     |     |        |        |        |      |      |
| HETATM | 7074 | H6 | PRP | 460 | 24.361 | 27.512 | 44.641 | 1.00 | 0.00 |
| H      |      |    |     |     |        |        |        |      |      |
| HETATM | 7075 | H7 | PRP | 460 | 24.326 | 25.973 | 43.877 | 1.00 | 0.00 |
| H      |      |    |     |     |        |        |        |      |      |
| HETATM | 7076 | H8 | PRP | 460 | 25.476 | 26.124 | 45.261 | 1.00 | 0.00 |
| H      |      |    |     |     |        |        |        |      |      |
| HETATM | 7077 | O1 | PRP | 461 | 32.110 | 30.943 | 33.687 | 1.00 | 0.00 |
| O      |      |    |     |     |        |        |        |      |      |
| HETATM | 7078 | H1 | PRP | 461 | 32.584 | 31.246 | 32.909 | 1.00 | 0.00 |
| H      |      |    |     |     |        |        |        |      |      |
| HETATM | 7079 | C1 | PRP | 461 | 30.701 | 30.987 | 33.371 | 1.00 | 0.00 |
| C      |      |    |     |     |        |        |        |      |      |
| HETATM | 7080 | H2 | PRP | 461 | 30.426 | 30.113 | 32.781 | 1.00 | 0.00 |
| H      |      |    |     |     |        |        |        |      |      |
| HETATM | 7081 | H3 | PRP | 461 | 30.202 | 30.827 | 34.327 | 1.00 | 0.00 |
| H      |      |    |     |     |        |        |        |      |      |
| HETATM | 7082 | C2 | PRP | 461 | 30.278 | 32.220 | 32.576 | 1.00 | 0.00 |
| C      |      |    |     |     |        |        |        |      |      |
| HETATM | 7083 | H4 | PRP | 461 | 29.382 | 31.969 | 32.010 | 1.00 | 0.00 |
| H      |      |    |     |     |        |        |        |      |      |



|        |      |    |     |     |        |        |        |      |      |
|--------|------|----|-----|-----|--------|--------|--------|------|------|
| HETATM | 7084 | O2 | PRP | 461 | 31.216 | 32.546 | 31.626 | 1.00 | 0.00 |
| O      |      |    |     |     |        |        |        |      |      |
| HETATM | 7085 | H5 | PRP | 461 | 30.944 | 33.350 | 31.176 | 1.00 | 0.00 |
| H      |      |    |     |     |        |        |        |      |      |
| HETATM | 7086 | C3 | PRP | 461 | 30.131 | 33.417 | 33.543 | 1.00 | 0.00 |
| C      |      |    |     |     |        |        |        |      |      |
| HETATM | 7087 | H6 | PRP | 461 | 29.968 | 34.293 | 32.915 | 1.00 | 0.00 |
| H      |      |    |     |     |        |        |        |      |      |
| HETATM | 7088 | H7 | PRP | 461 | 29.383 | 33.156 | 34.291 | 1.00 | 0.00 |
| H      |      |    |     |     |        |        |        |      |      |
| HETATM | 7089 | H8 | PRP | 461 | 31.030 | 33.461 | 34.159 | 1.00 | 0.00 |
| H      |      |    |     |     |        |        |        |      |      |
| HETATM | 7090 | O1 | PRP | 462 | 39.930 | 30.858 | 31.370 | 1.00 | 0.00 |
| O      |      |    |     |     |        |        |        |      |      |
| HETATM | 7091 | H1 | PRP | 462 | 39.588 | 31.589 | 30.850 | 1.00 | 0.00 |
| H      |      |    |     |     |        |        |        |      |      |
| HETATM | 7092 | C1 | PRP | 462 | 38.971 | 30.442 | 32.301 | 1.00 | 0.00 |
| C      |      |    |     |     |        |        |        |      |      |
| HETATM | 7093 | H2 | PRP | 462 | 39.138 | 29.466 | 32.757 | 1.00 | 0.00 |
| H      |      |    |     |     |        |        |        |      |      |
| HETATM | 7094 | H3 | PRP | 462 | 38.791 | 31.231 | 33.031 | 1.00 | 0.00 |
| H      |      |    |     |     |        |        |        |      |      |
| HETATM | 7095 | C2 | PRP | 462 | 37.600 | 30.178 | 31.627 | 1.00 | 0.00 |
| C      |      |    |     |     |        |        |        |      |      |
| HETATM | 7096 | H4 | PRP | 462 | 37.734 | 29.469 | 30.811 | 1.00 | 0.00 |
| H      |      |    |     |     |        |        |        |      |      |
| HETATM | 7097 | O2 | PRP | 462 | 37.152 | 31.389 | 31.083 | 1.00 | 0.00 |
| O      |      |    |     |     |        |        |        |      |      |
| HETATM | 7098 | H5 | PRP | 462 | 36.666 | 31.152 | 30.290 | 1.00 | 0.00 |
| H      |      |    |     |     |        |        |        |      |      |
| HETATM | 7099 | C3 | PRP | 462 | 36.558 | 29.591 | 32.523 | 1.00 | 0.00 |
| C      |      |    |     |     |        |        |        |      |      |
| HETATM | 7100 | H6 | PRP | 462 | 36.137 | 30.364 | 33.166 | 1.00 | 0.00 |
| H      |      |    |     |     |        |        |        |      |      |
| HETATM | 7101 | H7 | PRP | 462 | 35.791 | 29.023 | 31.996 | 1.00 | 0.00 |
| H      |      |    |     |     |        |        |        |      |      |
| HETATM | 7102 | H8 | PRP | 462 | 37.076 | 28.928 | 33.215 | 1.00 | 0.00 |
| H      |      |    |     |     |        |        |        |      |      |
| HETATM | 7103 | O1 | PRP | 463 | 19.033 | 19.974 | 34.283 | 1.00 | 0.00 |
| O      |      |    |     |     |        |        |        |      |      |
| HETATM | 7104 | H1 | PRP | 463 | 19.715 | 19.305 | 34.383 | 1.00 | 0.00 |
| H      |      |    |     |     |        |        |        |      |      |
| HETATM | 7105 | C1 | PRP | 463 | 19.468 | 21.192 | 34.810 | 1.00 | 0.00 |
| C      |      |    |     |     |        |        |        |      |      |
| HETATM | 7106 | H2 | PRP | 463 | 18.817 | 22.037 | 34.587 | 1.00 | 0.00 |
| H      |      |    |     |     |        |        |        |      |      |
| HETATM | 7107 | H3 | PRP | 463 | 19.670 | 21.124 | 35.879 | 1.00 | 0.00 |
| H      |      |    |     |     |        |        |        |      |      |
| HETATM | 7108 | C2 | PRP | 463 | 20.901 | 21.613 | 34.283 | 1.00 | 0.00 |
| C      |      |    |     |     |        |        |        |      |      |
| HETATM | 7109 | H4 | PRP | 463 | 21.075 | 22.681 | 34.154 | 1.00 | 0.00 |
| H      |      |    |     |     |        |        |        |      |      |
| HETATM | 7110 | O2 | PRP | 463 | 20.806 | 21.158 | 32.917 | 1.00 | 0.00 |
| O      |      |    |     |     |        |        |        |      |      |
| HETATM | 7111 | H5 | PRP | 463 | 20.230 | 20.400 | 33.035 | 1.00 | 0.00 |
| H      |      |    |     |     |        |        |        |      |      |

|        |      |    |     |     |        |        |        |      |      |
|--------|------|----|-----|-----|--------|--------|--------|------|------|
| HETATM | 7112 | C3 | PRP | 463 | 21.998 | 21.022 | 35.116 | 1.00 | 0.00 |
| C      |      |    |     |     |        |        |        |      |      |
| HETATM | 7113 | H6 | PRP | 463 | 21.850 | 19.978 | 35.392 | 1.00 | 0.00 |
| H      |      |    |     |     |        |        |        |      |      |
| HETATM | 7114 | H7 | PRP | 463 | 22.947 | 21.193 | 34.606 | 1.00 | 0.00 |
| H      |      |    |     |     |        |        |        |      |      |
| HETATM | 7115 | H8 | PRP | 463 | 21.936 | 21.724 | 35.947 | 1.00 | 0.00 |
| H      |      |    |     |     |        |        |        |      |      |
| HETATM | 7116 | O1 | PRP | 464 | 23.761 | 24.215 | 21.418 | 1.00 | 0.00 |
| O      |      |    |     |     |        |        |        |      |      |
| HETATM | 7117 | H1 | PRP | 464 | 23.894 | 23.628 | 22.166 | 1.00 | 0.00 |
| H      |      |    |     |     |        |        |        |      |      |
| HETATM | 7118 | C1 | PRP | 464 | 24.679 | 25.255 | 21.511 | 1.00 | 0.00 |
| C      |      |    |     |     |        |        |        |      |      |
| HETATM | 7119 | H2 | PRP | 464 | 25.469 | 25.196 | 20.763 | 1.00 | 0.00 |
| H      |      |    |     |     |        |        |        |      |      |
| HETATM | 7120 | H3 | PRP | 464 | 24.291 | 26.271 | 21.436 | 1.00 | 0.00 |
| H      |      |    |     |     |        |        |        |      |      |
| HETATM | 7121 | C2 | PRP | 464 | 25.477 | 25.092 | 22.825 | 1.00 | 0.00 |
| C      |      |    |     |     |        |        |        |      |      |
| HETATM | 7122 | H4 | PRP | 464 | 26.426 | 25.586 | 22.615 | 1.00 | 0.00 |
| H      |      |    |     |     |        |        |        |      |      |
| HETATM | 7123 | O2 | PRP | 464 | 25.576 | 23.686 | 23.081 | 1.00 | 0.00 |
| O      |      |    |     |     |        |        |        |      |      |
| HETATM | 7124 | H5 | PRP | 464 | 25.843 | 23.648 | 24.003 | 1.00 | 0.00 |
| H      |      |    |     |     |        |        |        |      |      |
| HETATM | 7125 | C3 | PRP | 464 | 24.875 | 25.646 | 24.131 | 1.00 | 0.00 |
| C      |      |    |     |     |        |        |        |      |      |
| HETATM | 7126 | H6 | PRP | 464 | 24.017 | 25.049 | 24.439 | 1.00 | 0.00 |
| H      |      |    |     |     |        |        |        |      |      |
| HETATM | 7127 | H7 | PRP | 464 | 25.632 | 25.795 | 24.901 | 1.00 | 0.00 |
| H      |      |    |     |     |        |        |        |      |      |
| HETATM | 7128 | H8 | PRP | 464 | 24.561 | 26.656 | 23.865 | 1.00 | 0.00 |
| H      |      |    |     |     |        |        |        |      |      |
| HETATM | 7129 | O1 | PRP | 465 | 31.472 | 16.598 | 42.009 | 1.00 | 0.00 |
| O      |      |    |     |     |        |        |        |      |      |
| HETATM | 7130 | H1 | PRP | 465 | 30.582 | 16.247 | 41.939 | 1.00 | 0.00 |
| H      |      |    |     |     |        |        |        |      |      |
| HETATM | 7131 | C1 | PRP | 465 | 32.138 | 16.260 | 43.173 | 1.00 | 0.00 |
| C      |      |    |     |     |        |        |        |      |      |
| HETATM | 7132 | H2 | PRP | 465 | 32.145 | 15.181 | 43.328 | 1.00 | 0.00 |
| H      |      |    |     |     |        |        |        |      |      |
| HETATM | 7133 | H3 | PRP | 465 | 33.152 | 16.647 | 43.075 | 1.00 | 0.00 |
| H      |      |    |     |     |        |        |        |      |      |
| HETATM | 7134 | C2 | PRP | 465 | 31.500 | 17.019 | 44.345 | 1.00 | 0.00 |
| C      |      |    |     |     |        |        |        |      |      |
| HETATM | 7135 | H4 | PRP | 465 | 32.040 | 16.754 | 45.254 | 1.00 | 0.00 |
| H      |      |    |     |     |        |        |        |      |      |
| HETATM | 7136 | O2 | PRP | 465 | 30.108 | 16.652 | 44.503 | 1.00 | 0.00 |
| O      |      |    |     |     |        |        |        |      |      |
| HETATM | 7137 | H5 | PRP | 465 | 29.774 | 16.600 | 43.605 | 1.00 | 0.00 |
| H      |      |    |     |     |        |        |        |      |      |
| HETATM | 7138 | C3 | PRP | 465 | 31.533 | 18.550 | 44.326 | 1.00 | 0.00 |
| C      |      |    |     |     |        |        |        |      |      |
| HETATM | 7139 | H6 | PRP | 465 | 32.507 | 18.945 | 44.615 | 1.00 | 0.00 |
| H      |      |    |     |     |        |        |        |      |      |

|        |      |    |     |     |        |        |        |      |      |
|--------|------|----|-----|-----|--------|--------|--------|------|------|
| HETATM | 7140 | H7 | PRP | 465 | 31.309 | 19.001 | 43.360 | 1.00 | 0.00 |
| H      |      |    |     |     |        |        |        |      |      |
| HETATM | 7141 | H8 | PRP | 465 | 30.833 | 18.935 | 45.067 | 1.00 | 0.00 |
| H      |      |    |     |     |        |        |        |      |      |
| HETATM | 7142 | O1 | PRP | 466 | 37.531 | 23.636 | 26.513 | 1.00 | 0.00 |
| O      |      |    |     |     |        |        |        |      |      |
| HETATM | 7143 | H1 | PRP | 466 | 37.971 | 22.992 | 27.073 | 1.00 | 0.00 |
| H      |      |    |     |     |        |        |        |      |      |
| HETATM | 7144 | C1 | PRP | 466 | 37.465 | 22.991 | 25.232 | 1.00 | 0.00 |
| C      |      |    |     |     |        |        |        |      |      |
| HETATM | 7145 | H2 | PRP | 466 | 37.551 | 23.715 | 24.422 | 1.00 | 0.00 |
| H      |      |    |     |     |        |        |        |      |      |
| HETATM | 7146 | H3 | PRP | 466 | 38.353 | 22.361 | 25.262 | 1.00 | 0.00 |
| H      |      |    |     |     |        |        |        |      |      |
| HETATM | 7147 | C2 | PRP | 466 | 36.221 | 22.144 | 25.249 | 1.00 | 0.00 |
| C      |      |    |     |     |        |        |        |      |      |
| HETATM | 7148 | H4 | PRP | 466 | 35.451 | 22.724 | 25.757 | 1.00 | 0.00 |
| H      |      |    |     |     |        |        |        |      |      |
| HETATM | 7149 | O2 | PRP | 466 | 36.390 | 20.942 | 25.968 | 1.00 | 0.00 |
| O      |      |    |     |     |        |        |        |      |      |
| HETATM | 7150 | H5 | PRP | 466 | 36.805 | 21.253 | 26.776 | 1.00 | 0.00 |
| H      |      |    |     |     |        |        |        |      |      |
| HETATM | 7151 | C3 | PRP | 466 | 35.716 | 21.641 | 23.902 | 1.00 | 0.00 |
| C      |      |    |     |     |        |        |        |      |      |
| HETATM | 7152 | H6 | PRP | 466 | 36.507 | 21.163 | 23.325 | 1.00 | 0.00 |
| H      |      |    |     |     |        |        |        |      |      |
| HETATM | 7153 | H7 | PRP | 466 | 34.896 | 20.961 | 24.132 | 1.00 | 0.00 |
| H      |      |    |     |     |        |        |        |      |      |
| HETATM | 7154 | H8 | PRP | 466 | 35.321 | 22.501 | 23.360 | 1.00 | 0.00 |
| H      |      |    |     |     |        |        |        |      |      |
| HETATM | 7155 | O1 | PRP | 467 | 36.600 | 53.793 | 40.515 | 1.00 | 0.00 |
| O      |      |    |     |     |        |        |        |      |      |
| HETATM | 7156 | H1 | PRP | 467 | 36.509 | 53.590 | 39.581 | 1.00 | 0.00 |
| H      |      |    |     |     |        |        |        |      |      |
| HETATM | 7157 | C1 | PRP | 467 | 37.860 | 53.273 | 40.819 | 1.00 | 0.00 |
| C      |      |    |     |     |        |        |        |      |      |
| HETATM | 7158 | H2 | PRP | 467 | 38.459 | 53.630 | 39.981 | 1.00 | 0.00 |
| H      |      |    |     |     |        |        |        |      |      |
| HETATM | 7159 | H3 | PRP | 467 | 38.358 | 53.739 | 41.669 | 1.00 | 0.00 |
| H      |      |    |     |     |        |        |        |      |      |
| HETATM | 7160 | C2 | PRP | 467 | 37.958 | 51.670 | 41.055 | 1.00 | 0.00 |
| C      |      |    |     |     |        |        |        |      |      |
| HETATM | 7161 | H4 | PRP | 467 | 37.834 | 51.186 | 40.086 | 1.00 | 0.00 |
| H      |      |    |     |     |        |        |        |      |      |
| HETATM | 7162 | O2 | PRP | 467 | 36.859 | 51.244 | 41.820 | 1.00 | 0.00 |
| O      |      |    |     |     |        |        |        |      |      |
| HETATM | 7163 | H5 | PRP | 467 | 37.128 | 51.486 | 42.709 | 1.00 | 0.00 |
| H      |      |    |     |     |        |        |        |      |      |
| HETATM | 7164 | C3 | PRP | 467 | 39.188 | 51.140 | 41.804 | 1.00 | 0.00 |
| C      |      |    |     |     |        |        |        |      |      |
| HETATM | 7165 | H6 | PRP | 467 | 40.132 | 51.320 | 41.290 | 1.00 | 0.00 |
| H      |      |    |     |     |        |        |        |      |      |
| HETATM | 7166 | H7 | PRP | 467 | 39.363 | 51.545 | 42.801 | 1.00 | 0.00 |
| H      |      |    |     |     |        |        |        |      |      |
| HETATM | 7167 | H8 | PRP | 467 | 39.113 | 50.057 | 41.896 | 1.00 | 0.00 |
| H      |      |    |     |     |        |        |        |      |      |

|        |      |    |     |     |        |        |        |      |      |
|--------|------|----|-----|-----|--------|--------|--------|------|------|
| HETATM | 7168 | O1 | PRP | 468 | 21.390 | 21.579 | 40.179 | 1.00 | 0.00 |
| O      |      |    |     |     |        |        |        |      |      |
| HETATM | 7169 | H1 | PRP | 468 | 22.220 | 21.580 | 40.660 | 1.00 | 0.00 |
| H      |      |    |     |     |        |        |        |      |      |
| HETATM | 7170 | C1 | PRP | 468 | 20.520 | 22.095 | 41.192 | 1.00 | 0.00 |
| C      |      |    |     |     |        |        |        |      |      |
| HETATM | 7171 | H2 | PRP | 468 | 19.497 | 21.838 | 40.918 | 1.00 | 0.00 |
| H      |      |    |     |     |        |        |        |      |      |
| HETATM | 7172 | H3 | PRP | 468 | 20.849 | 21.690 | 42.149 | 1.00 | 0.00 |
| H      |      |    |     |     |        |        |        |      |      |
| HETATM | 7173 | C2 | PRP | 468 | 20.699 | 23.659 | 41.270 | 1.00 | 0.00 |
| C      |      |    |     |     |        |        |        |      |      |
| HETATM | 7174 | H4 | PRP | 468 | 20.627 | 23.995 | 40.235 | 1.00 | 0.00 |
| H      |      |    |     |     |        |        |        |      |      |
| HETATM | 7175 | O2 | PRP | 468 | 21.989 | 24.049 | 41.718 | 1.00 | 0.00 |
| O      |      |    |     |     |        |        |        |      |      |
| HETATM | 7176 | H5 | PRP | 468 | 22.099 | 25.002 | 41.710 | 1.00 | 0.00 |
| H      |      |    |     |     |        |        |        |      |      |
| HETATM | 7177 | C3 | PRP | 468 | 19.606 | 24.280 | 42.166 | 1.00 | 0.00 |
| C      |      |    |     |     |        |        |        |      |      |
| HETATM | 7178 | H6 | PRP | 468 | 19.699 | 25.364 | 42.237 | 1.00 | 0.00 |
| H      |      |    |     |     |        |        |        |      |      |
| HETATM | 7179 | H7 | PRP | 468 | 18.674 | 24.094 | 41.633 | 1.00 | 0.00 |
| H      |      |    |     |     |        |        |        |      |      |
| HETATM | 7180 | H8 | PRP | 468 | 19.559 | 23.755 | 43.120 | 1.00 | 0.00 |
| H      |      |    |     |     |        |        |        |      |      |
| HETATM | 7181 | O1 | PRP | 469 | 25.923 | 22.883 | 25.687 | 1.00 | 0.00 |
| O      |      |    |     |     |        |        |        |      |      |
| HETATM | 7182 | H1 | PRP | 469 | 25.870 | 23.304 | 26.547 | 1.00 | 0.00 |
| H      |      |    |     |     |        |        |        |      |      |
| HETATM | 7183 | C1 | PRP | 469 | 26.148 | 21.541 | 25.944 | 1.00 | 0.00 |
| C      |      |    |     |     |        |        |        |      |      |
| HETATM | 7184 | H2 | PRP | 469 | 26.961 | 21.404 | 26.658 | 1.00 | 0.00 |
| H      |      |    |     |     |        |        |        |      |      |
| HETATM | 7185 | H3 | PRP | 469 | 25.238 | 21.141 | 26.390 | 1.00 | 0.00 |
| H      |      |    |     |     |        |        |        |      |      |
| HETATM | 7186 | C2 | PRP | 469 | 26.454 | 20.675 | 24.642 | 1.00 | 0.00 |
| C      |      |    |     |     |        |        |        |      |      |
| HETATM | 7187 | H4 | PRP | 469 | 27.440 | 20.918 | 24.248 | 1.00 | 0.00 |
| H      |      |    |     |     |        |        |        |      |      |
| HETATM | 7188 | O2 | PRP | 469 | 25.411 | 20.868 | 23.725 | 1.00 | 0.00 |
| O      |      |    |     |     |        |        |        |      |      |
| HETATM | 7189 | H5 | PRP | 469 | 25.696 | 21.731 | 23.416 | 1.00 | 0.00 |
| H      |      |    |     |     |        |        |        |      |      |
| HETATM | 7190 | C3 | PRP | 469 | 26.533 | 19.213 | 25.058 | 1.00 | 0.00 |
| C      |      |    |     |     |        |        |        |      |      |
| HETATM | 7191 | H6 | PRP | 469 | 25.583 | 18.987 | 25.541 | 1.00 | 0.00 |
| H      |      |    |     |     |        |        |        |      |      |
| HETATM | 7192 | H7 | PRP | 469 | 26.541 | 18.588 | 24.165 | 1.00 | 0.00 |
| H      |      |    |     |     |        |        |        |      |      |
| HETATM | 7193 | H8 | PRP | 469 | 27.442 | 18.987 | 25.616 | 1.00 | 0.00 |
| H      |      |    |     |     |        |        |        |      |      |
| HETATM | 7194 | O1 | PRP | 470 | 26.591 | 8.996  | 43.192 | 1.00 | 0.00 |
| O      |      |    |     |     |        |        |        |      |      |
| HETATM | 7195 | H1 | PRP | 470 | 26.340 | 8.790  | 42.289 | 1.00 | 0.00 |
| H      |      |    |     |     |        |        |        |      |      |

|        |      |    |     |     |        |        |        |      |      |
|--------|------|----|-----|-----|--------|--------|--------|------|------|
| HETATM | 7196 | C1 | PRP | 470 | 26.075 | 7.972  | 44.058 | 1.00 | 0.00 |
| C      |      |    |     |     |        |        |        |      |      |
| HETATM | 7197 | H2 | PRP | 470 | 26.528 | 7.039  | 43.720 | 1.00 | 0.00 |
| H      |      |    |     |     |        |        |        |      |      |
| HETATM | 7198 | H3 | PRP | 470 | 26.424 | 8.035  | 45.088 | 1.00 | 0.00 |
| H      |      |    |     |     |        |        |        |      |      |
| HETATM | 7199 | C2 | PRP | 470 | 24.533 | 7.891  | 44.126 | 1.00 | 0.00 |
| C      |      |    |     |     |        |        |        |      |      |
| HETATM | 7200 | H4 | PRP | 470 | 24.174 | 7.324  | 44.985 | 1.00 | 0.00 |
| H      |      |    |     |     |        |        |        |      |      |
| HETATM | 7201 | O2 | PRP | 470 | 24.056 | 7.430  | 42.915 | 1.00 | 0.00 |
| O      |      |    |     |     |        |        |        |      |      |
| HETATM | 7202 | H5 | PRP | 470 | 23.106 | 7.449  | 43.052 | 1.00 | 0.00 |
| H      |      |    |     |     |        |        |        |      |      |
| HETATM | 7203 | C3 | PRP | 470 | 23.956 | 9.343  | 44.326 | 1.00 | 0.00 |
| C      |      |    |     |     |        |        |        |      |      |
| HETATM | 7204 | H6 | PRP | 470 | 24.555 | 9.943  | 45.011 | 1.00 | 0.00 |
| H      |      |    |     |     |        |        |        |      |      |
| HETATM | 7205 | H7 | PRP | 470 | 23.859 | 9.774  | 43.330 | 1.00 | 0.00 |
| H      |      |    |     |     |        |        |        |      |      |
| HETATM | 7206 | H8 | PRP | 470 | 23.029 | 9.138  | 44.862 | 1.00 | 0.00 |
| H      |      |    |     |     |        |        |        |      |      |
| HETATM | 7207 | O1 | PRP | 471 | 37.794 | 21.419 | 28.340 | 1.00 | 0.00 |
| O      |      |    |     |     |        |        |        |      |      |
| HETATM | 7208 | H1 | PRP | 471 | 37.256 | 21.362 | 29.133 | 1.00 | 0.00 |
| H      |      |    |     |     |        |        |        |      |      |
| HETATM | 7209 | C1 | PRP | 471 | 39.106 | 21.947 | 28.820 | 1.00 | 0.00 |
| C      |      |    |     |     |        |        |        |      |      |
| HETATM | 7210 | H2 | PRP | 471 | 39.035 | 23.035 | 28.841 | 1.00 | 0.00 |
| H      |      |    |     |     |        |        |        |      |      |
| HETATM | 7211 | H3 | PRP | 471 | 39.160 | 21.698 | 29.880 | 1.00 | 0.00 |
| H      |      |    |     |     |        |        |        |      |      |
| HETATM | 7212 | C2 | PRP | 471 | 40.366 | 21.514 | 28.089 | 1.00 | 0.00 |
| C      |      |    |     |     |        |        |        |      |      |
| HETATM | 7213 | H4 | PRP | 471 | 41.228 | 21.800 | 28.692 | 1.00 | 0.00 |
| H      |      |    |     |     |        |        |        |      |      |
| HETATM | 7214 | O2 | PRP | 471 | 40.484 | 22.076 | 26.789 | 1.00 | 0.00 |
| O      |      |    |     |     |        |        |        |      |      |
| HETATM | 7215 | H5 | PRP | 471 | 41.292 | 21.792 | 26.357 | 1.00 | 0.00 |
| H      |      |    |     |     |        |        |        |      |      |
| HETATM | 7216 | C3 | PRP | 471 | 40.318 | 19.963 | 28.048 | 1.00 | 0.00 |
| C      |      |    |     |     |        |        |        |      |      |
| HETATM | 7217 | H6 | PRP | 471 | 41.362 | 19.655 | 27.996 | 1.00 | 0.00 |
| H      |      |    |     |     |        |        |        |      |      |
| HETATM | 7218 | H7 | PRP | 471 | 39.970 | 19.597 | 29.014 | 1.00 | 0.00 |
| H      |      |    |     |     |        |        |        |      |      |
| HETATM | 7219 | H8 | PRP | 471 | 39.745 | 19.658 | 27.172 | 1.00 | 0.00 |
| H      |      |    |     |     |        |        |        |      |      |
| HETATM | 7220 | O1 | PRP | 472 | 44.482 | 24.636 | 33.625 | 1.00 | 0.00 |
| O      |      |    |     |     |        |        |        |      |      |
| HETATM | 7221 | H1 | PRP | 472 | 44.888 | 24.121 | 34.326 | 1.00 | 0.00 |
| H      |      |    |     |     |        |        |        |      |      |
| HETATM | 7222 | C1 | PRP | 472 | 44.825 | 24.011 | 32.338 | 1.00 | 0.00 |
| C      |      |    |     |     |        |        |        |      |      |
| HETATM | 7223 | H2 | PRP | 472 | 45.812 | 24.251 | 31.942 | 1.00 | 0.00 |
| H      |      |    |     |     |        |        |        |      |      |

|        |      |    |     |     |        |        |        |      |      |
|--------|------|----|-----|-----|--------|--------|--------|------|------|
| HETATM | 7224 | H3 | PRP | 472 | 44.586 | 22.962 | 32.514 | 1.00 | 0.00 |
| H      |      |    |     |     |        |        |        |      |      |
| HETATM | 7225 | C2 | PRP | 472 | 43.914 | 24.561 | 31.211 | 1.00 | 0.00 |
| C      |      |    |     |     |        |        |        |      |      |
| HETATM | 7226 | H4 | PRP | 472 | 44.237 | 25.579 | 30.997 | 1.00 | 0.00 |
| H      |      |    |     |     |        |        |        |      |      |
| HETATM | 7227 | O2 | PRP | 472 | 42.610 | 24.694 | 31.656 | 1.00 | 0.00 |
| O      |      |    |     |     |        |        |        |      |      |
| HETATM | 7228 | H5 | PRP | 472 | 42.704 | 24.877 | 32.594 | 1.00 | 0.00 |
| H      |      |    |     |     |        |        |        |      |      |
| HETATM | 7229 | C3 | PRP | 472 | 43.867 | 23.568 | 30.022 | 1.00 | 0.00 |
| C      |      |    |     |     |        |        |        |      |      |
| HETATM | 7230 | H6 | PRP | 472 | 44.843 | 23.724 | 29.561 | 1.00 | 0.00 |
| H      |      |    |     |     |        |        |        |      |      |
| HETATM | 7231 | H7 | PRP | 472 | 43.781 | 22.547 | 30.392 | 1.00 | 0.00 |
| H      |      |    |     |     |        |        |        |      |      |
| HETATM | 7232 | H8 | PRP | 472 | 43.126 | 23.814 | 29.262 | 1.00 | 0.00 |
| H      |      |    |     |     |        |        |        |      |      |
| HETATM | 7233 | O1 | PRP | 473 | 25.957 | 9.744  | 38.511 | 1.00 | 0.00 |
| O      |      |    |     |     |        |        |        |      |      |
| HETATM | 7234 | H1 | PRP | 473 | 25.775 | 9.932  | 39.435 | 1.00 | 0.00 |
| H      |      |    |     |     |        |        |        |      |      |
| HETATM | 7235 | C1 | PRP | 473 | 24.729 | 9.118  | 38.204 | 1.00 | 0.00 |
| C      |      |    |     |     |        |        |        |      |      |
| HETATM | 7236 | H2 | PRP | 473 | 24.070 | 9.977  | 38.073 | 1.00 | 0.00 |
| H      |      |    |     |     |        |        |        |      |      |
| HETATM | 7237 | H3 | PRP | 473 | 24.806 | 8.574  | 37.263 | 1.00 | 0.00 |
| H      |      |    |     |     |        |        |        |      |      |
| HETATM | 7238 | C2 | PRP | 473 | 24.255 | 8.310  | 39.405 | 1.00 | 0.00 |
| C      |      |    |     |     |        |        |        |      |      |
| HETATM | 7239 | H4 | PRP | 473 | 23.196 | 8.069  | 39.316 | 1.00 | 0.00 |
| H      |      |    |     |     |        |        |        |      |      |
| HETATM | 7240 | O2 | PRP | 473 | 24.310 | 9.126  | 40.635 | 1.00 | 0.00 |
| O      |      |    |     |     |        |        |        |      |      |
| HETATM | 7241 | H5 | PRP | 473 | 23.891 | 8.689  | 41.380 | 1.00 | 0.00 |
| H      |      |    |     |     |        |        |        |      |      |
| HETATM | 7242 | C3 | PRP | 473 | 25.101 | 7.052  | 39.661 | 1.00 | 0.00 |
| C      |      |    |     |     |        |        |        |      |      |
| HETATM | 7243 | H6 | PRP | 473 | 24.723 | 6.655  | 40.602 | 1.00 | 0.00 |
| H      |      |    |     |     |        |        |        |      |      |
| HETATM | 7244 | H7 | PRP | 473 | 24.928 | 6.278  | 38.913 | 1.00 | 0.00 |
| H      |      |    |     |     |        |        |        |      |      |
| HETATM | 7245 | H8 | PRP | 473 | 26.156 | 7.305  | 39.550 | 1.00 | 0.00 |
| H      |      |    |     |     |        |        |        |      |      |
| HETATM | 7246 | O1 | PRP | 474 | 24.522 | 14.225 | 32.031 | 1.00 | 0.00 |
| O      |      |    |     |     |        |        |        |      |      |
| HETATM | 7247 | H1 | PRP | 474 | 23.710 | 13.806 | 31.737 | 1.00 | 0.00 |
| H      |      |    |     |     |        |        |        |      |      |
| HETATM | 7248 | C1 | PRP | 474 | 25.274 | 13.278 | 32.750 | 1.00 | 0.00 |
| C      |      |    |     |     |        |        |        |      |      |
| HETATM | 7249 | H2 | PRP | 474 | 25.378 | 12.344 | 32.198 | 1.00 | 0.00 |
| H      |      |    |     |     |        |        |        |      |      |
| HETATM | 7250 | H3 | PRP | 474 | 26.294 | 13.614 | 32.933 | 1.00 | 0.00 |
| H      |      |    |     |     |        |        |        |      |      |
| HETATM | 7251 | C2 | PRP | 474 | 24.524 | 12.933 | 34.087 | 1.00 | 0.00 |
| C      |      |    |     |     |        |        |        |      |      |

|        |      |    |     |     |        |        |        |      |      |
|--------|------|----|-----|-----|--------|--------|--------|------|------|
| HETATM | 7252 | H4 | PRP | 474 | 25.023 | 12.154 | 34.665 | 1.00 | 0.00 |
| H      |      |    |     |     |        |        |        |      |      |
| HETATM | 7253 | O2 | PRP | 474 | 23.201 | 12.471 | 33.911 | 1.00 | 0.00 |
| O      |      |    |     |     |        |        |        |      |      |
| HETATM | 7254 | H5 | PRP | 474 | 23.294 | 11.755 | 33.279 | 1.00 | 0.00 |
| H      |      |    |     |     |        |        |        |      |      |
| HETATM | 7255 | C3 | PRP | 474 | 24.562 | 14.082 | 35.074 | 1.00 | 0.00 |
| C      |      |    |     |     |        |        |        |      |      |
| HETATM | 7256 | H6 | PRP | 474 | 24.261 | 14.944 | 34.478 | 1.00 | 0.00 |
| H      |      |    |     |     |        |        |        |      |      |
| HETATM | 7257 | H7 | PRP | 474 | 23.940 | 13.929 | 35.956 | 1.00 | 0.00 |
| H      |      |    |     |     |        |        |        |      |      |
| HETATM | 7258 | H8 | PRP | 474 | 25.622 | 14.258 | 35.256 | 1.00 | 0.00 |
| H      |      |    |     |     |        |        |        |      |      |
| HETATM | 7259 | O1 | PRP | 475 | 41.763 | 24.038 | 46.122 | 1.00 | 0.00 |
| O      |      |    |     |     |        |        |        |      |      |
| HETATM | 7260 | H1 | PRP | 475 | 41.856 | 24.867 | 45.648 | 1.00 | 0.00 |
| H      |      |    |     |     |        |        |        |      |      |
| HETATM | 7261 | C1 | PRP | 475 | 42.519 | 22.926 | 45.674 | 1.00 | 0.00 |
| C      |      |    |     |     |        |        |        |      |      |
| HETATM | 7262 | H2 | PRP | 475 | 42.425 | 22.734 | 44.606 | 1.00 | 0.00 |
| H      |      |    |     |     |        |        |        |      |      |
| HETATM | 7263 | H3 | PRP | 475 | 43.589 | 23.040 | 45.850 | 1.00 | 0.00 |
| H      |      |    |     |     |        |        |        |      |      |
| HETATM | 7264 | C2 | PRP | 475 | 42.078 | 21.668 | 46.431 | 1.00 | 0.00 |
| C      |      |    |     |     |        |        |        |      |      |
| HETATM | 7265 | H4 | PRP | 475 | 42.644 | 20.817 | 46.054 | 1.00 | 0.00 |
| H      |      |    |     |     |        |        |        |      |      |
| HETATM | 7266 | O2 | PRP | 475 | 40.712 | 21.362 | 46.281 | 1.00 | 0.00 |
| O      |      |    |     |     |        |        |        |      |      |
| HETATM | 7267 | H5 | PRP | 475 | 40.363 | 22.250 | 46.171 | 1.00 | 0.00 |
| H      |      |    |     |     |        |        |        |      |      |
| HETATM | 7268 | C3 | PRP | 475 | 42.314 | 21.939 | 47.942 | 1.00 | 0.00 |
| C      |      |    |     |     |        |        |        |      |      |
| HETATM | 7269 | H6 | PRP | 475 | 41.904 | 21.088 | 48.487 | 1.00 | 0.00 |
| H      |      |    |     |     |        |        |        |      |      |
| HETATM | 7270 | H7 | PRP | 475 | 43.396 | 21.927 | 48.075 | 1.00 | 0.00 |
| H      |      |    |     |     |        |        |        |      |      |
| HETATM | 7271 | H8 | PRP | 475 | 41.892 | 22.900 | 48.236 | 1.00 | 0.00 |
| H      |      |    |     |     |        |        |        |      |      |
| HETATM | 7272 | O1 | PRP | 476 | 35.279 | 23.195 | 32.435 | 1.00 | 0.00 |
| O      |      |    |     |     |        |        |        |      |      |
| HETATM | 7273 | H1 | PRP | 476 | 35.327 | 22.941 | 31.510 | 1.00 | 0.00 |
| H      |      |    |     |     |        |        |        |      |      |
| HETATM | 7274 | C1 | PRP | 476 | 35.840 | 22.145 | 33.190 | 1.00 | 0.00 |
| C      |      |    |     |     |        |        |        |      |      |
| HETATM | 7275 | H2 | PRP | 476 | 35.814 | 22.212 | 34.277 | 1.00 | 0.00 |
| H      |      |    |     |     |        |        |        |      |      |
| HETATM | 7276 | H3 | PRP | 476 | 35.216 | 21.285 | 32.947 | 1.00 | 0.00 |
| H      |      |    |     |     |        |        |        |      |      |
| HETATM | 7277 | C2 | PRP | 476 | 37.198 | 21.760 | 32.573 | 1.00 | 0.00 |
| C      |      |    |     |     |        |        |        |      |      |
| HETATM | 7278 | H4 | PRP | 476 | 37.820 | 22.639 | 32.741 | 1.00 | 0.00 |
| H      |      |    |     |     |        |        |        |      |      |
| HETATM | 7279 | O2 | PRP | 476 | 37.058 | 21.320 | 31.247 | 1.00 | 0.00 |
| O      |      |    |     |     |        |        |        |      |      |

|        |      |    |     |     |        |        |        |      |      |
|--------|------|----|-----|-----|--------|--------|--------|------|------|
| HETATM | 7280 | H5 | PRP | 476 | 36.422 | 20.608 | 31.146 | 1.00 | 0.00 |
| H      |      |    |     |     |        |        |        |      |      |
| HETATM | 7281 | C3 | PRP | 476 | 37.881 | 20.643 | 33.298 | 1.00 | 0.00 |
| C      |      |    |     |     |        |        |        |      |      |
| HETATM | 7282 | H6 | PRP | 476 | 38.751 | 20.267 | 32.761 | 1.00 | 0.00 |
| H      |      |    |     |     |        |        |        |      |      |
| HETATM | 7283 | H7 | PRP | 476 | 38.284 | 20.969 | 34.257 | 1.00 | 0.00 |
| H      |      |    |     |     |        |        |        |      |      |
| HETATM | 7284 | H8 | PRP | 476 | 37.315 | 19.722 | 33.432 | 1.00 | 0.00 |
| H      |      |    |     |     |        |        |        |      |      |
| HETATM | 7285 | O1 | PRP | 477 | 17.038 | 10.698 | 32.139 | 1.00 | 0.00 |
| O      |      |    |     |     |        |        |        |      |      |
| HETATM | 7286 | H1 | PRP | 477 | 16.169 | 11.064 | 31.957 | 1.00 | 0.00 |
| H      |      |    |     |     |        |        |        |      |      |
| HETATM | 7287 | C1 | PRP | 477 | 17.477 | 9.985  | 30.986 | 1.00 | 0.00 |
| C      |      |    |     |     |        |        |        |      |      |
| HETATM | 7288 | H2 | PRP | 477 | 16.658 | 9.342  | 30.665 | 1.00 | 0.00 |
| H      |      |    |     |     |        |        |        |      |      |
| HETATM | 7289 | H3 | PRP | 477 | 17.723 | 10.708 | 30.208 | 1.00 | 0.00 |
| H      |      |    |     |     |        |        |        |      |      |
| HETATM | 7290 | C2 | PRP | 477 | 18.680 | 9.155  | 31.522 | 1.00 | 0.00 |
| C      |      |    |     |     |        |        |        |      |      |
| HETATM | 7291 | H4 | PRP | 477 | 18.439 | 8.571  | 32.411 | 1.00 | 0.00 |
| H      |      |    |     |     |        |        |        |      |      |
| HETATM | 7292 | O2 | PRP | 477 | 19.653 | 10.167 | 31.881 | 1.00 | 0.00 |
| O      |      |    |     |     |        |        |        |      |      |
| HETATM | 7293 | H5 | PRP | 477 | 19.129 | 10.858 | 32.292 | 1.00 | 0.00 |
| H      |      |    |     |     |        |        |        |      |      |
| HETATM | 7294 | C3 | PRP | 477 | 19.108 | 8.230  | 30.382 | 1.00 | 0.00 |
| C      |      |    |     |     |        |        |        |      |      |
| HETATM | 7295 | H6 | PRP | 477 | 19.241 | 8.671  | 29.394 | 1.00 | 0.00 |
| H      |      |    |     |     |        |        |        |      |      |
| HETATM | 7296 | H7 | PRP | 477 | 20.032 | 7.737  | 30.683 | 1.00 | 0.00 |
| H      |      |    |     |     |        |        |        |      |      |
| HETATM | 7297 | H8 | PRP | 477 | 18.396 | 7.411  | 30.285 | 1.00 | 0.00 |
| H      |      |    |     |     |        |        |        |      |      |
| HETATM | 7298 | O1 | PRP | 478 | 21.533 | 8.341  | 33.162 | 1.00 | 0.00 |
| O      |      |    |     |     |        |        |        |      |      |
| HETATM | 7299 | H1 | PRP | 478 | 21.300 | 8.858  | 32.387 | 1.00 | 0.00 |
| H      |      |    |     |     |        |        |        |      |      |
| HETATM | 7300 | C1 | PRP | 478 | 22.338 | 9.169  | 33.980 | 1.00 | 0.00 |
| C      |      |    |     |     |        |        |        |      |      |
| HETATM | 7301 | H2 | PRP | 478 | 21.926 | 10.178 | 34.009 | 1.00 | 0.00 |
| H      |      |    |     |     |        |        |        |      |      |
| HETATM | 7302 | H3 | PRP | 478 | 22.312 | 8.814  | 35.011 | 1.00 | 0.00 |
| H      |      |    |     |     |        |        |        |      |      |
| HETATM | 7303 | C2 | PRP | 478 | 23.831 | 9.120  | 33.517 | 1.00 | 0.00 |
| C      |      |    |     |     |        |        |        |      |      |
| HETATM | 7304 | H4 | PRP | 478 | 24.336 | 9.486  | 34.411 | 1.00 | 0.00 |
| H      |      |    |     |     |        |        |        |      |      |
| HETATM | 7305 | O2 | PRP | 478 | 23.946 | 9.941  | 32.495 | 1.00 | 0.00 |
| O      |      |    |     |     |        |        |        |      |      |
| HETATM | 7306 | H5 | PRP | 478 | 23.599 | 9.620  | 31.660 | 1.00 | 0.00 |
| H      |      |    |     |     |        |        |        |      |      |
| HETATM | 7307 | C3 | PRP | 478 | 24.408 | 7.844  | 32.997 | 1.00 | 0.00 |
| C      |      |    |     |     |        |        |        |      |      |



|        |      |    |     |     |        |        |        |      |      |
|--------|------|----|-----|-----|--------|--------|--------|------|------|
| HETATM | 7308 | H6 | PRP | 478 | 25.462 | 7.719  | 33.245 | 1.00 | 0.00 |
| H      |      |    |     |     |        |        |        |      |      |
| HETATM | 7309 | H7 | PRP | 478 | 23.847 | 7.046  | 33.482 | 1.00 | 0.00 |
| H      |      |    |     |     |        |        |        |      |      |
| HETATM | 7310 | H8 | PRP | 478 | 24.202 | 7.659  | 31.943 | 1.00 | 0.00 |
| H      |      |    |     |     |        |        |        |      |      |
| HETATM | 7311 | O1 | PRP | 479 | 44.703 | 19.627 | 38.866 | 1.00 | 0.00 |
| O      |      |    |     |     |        |        |        |      |      |
| HETATM | 7312 | H1 | PRP | 479 | 45.341 | 20.313 | 38.657 | 1.00 | 0.00 |
| H      |      |    |     |     |        |        |        |      |      |
| HETATM | 7313 | C1 | PRP | 479 | 45.577 | 18.550 | 38.793 | 1.00 | 0.00 |
| C      |      |    |     |     |        |        |        |      |      |
| HETATM | 7314 | H2 | PRP | 479 | 44.996 | 17.644 | 38.621 | 1.00 | 0.00 |
| H      |      |    |     |     |        |        |        |      |      |
| HETATM | 7315 | H3 | PRP | 479 | 46.162 | 18.699 | 37.886 | 1.00 | 0.00 |
| H      |      |    |     |     |        |        |        |      |      |
| HETATM | 7316 | C2 | PRP | 479 | 46.491 | 18.411 | 39.960 | 1.00 | 0.00 |
| C      |      |    |     |     |        |        |        |      |      |
| HETATM | 7317 | H4 | PRP | 479 | 47.252 | 17.701 | 39.636 | 1.00 | 0.00 |
| H      |      |    |     |     |        |        |        |      |      |
| HETATM | 7318 | O2 | PRP | 479 | 45.817 | 17.884 | 41.100 | 1.00 | 0.00 |
| O      |      |    |     |     |        |        |        |      |      |
| HETATM | 7319 | H5 | PRP | 479 | 44.868 | 18.010 | 41.032 | 1.00 | 0.00 |
| H      |      |    |     |     |        |        |        |      |      |
| HETATM | 7320 | C3 | PRP | 479 | 47.179 | 19.726 | 40.507 | 1.00 | 0.00 |
| C      |      |    |     |     |        |        |        |      |      |
| HETATM | 7321 | H6 | PRP | 479 | 47.852 | 20.046 | 39.712 | 1.00 | 0.00 |
| H      |      |    |     |     |        |        |        |      |      |
| HETATM | 7322 | H7 | PRP | 479 | 46.405 | 20.420 | 40.835 | 1.00 | 0.00 |
| H      |      |    |     |     |        |        |        |      |      |
| HETATM | 7323 | H8 | PRP | 479 | 47.876 | 19.524 | 41.321 | 1.00 | 0.00 |
| H      |      |    |     |     |        |        |        |      |      |
| HETATM | 7324 | O1 | PRP | 480 | 42.951 | 21.928 | 25.684 | 1.00 | 0.00 |
| O      |      |    |     |     |        |        |        |      |      |
| HETATM | 7325 | H1 | PRP | 480 | 43.256 | 21.955 | 24.775 | 1.00 | 0.00 |
| H      |      |    |     |     |        |        |        |      |      |
| HETATM | 7326 | C1 | PRP | 480 | 44.113 | 21.814 | 26.460 | 1.00 | 0.00 |
| C      |      |    |     |     |        |        |        |      |      |
| HETATM | 7327 | H2 | PRP | 480 | 44.651 | 22.760 | 26.524 | 1.00 | 0.00 |
| H      |      |    |     |     |        |        |        |      |      |
| HETATM | 7328 | H3 | PRP | 480 | 43.785 | 21.512 | 27.454 | 1.00 | 0.00 |
| H      |      |    |     |     |        |        |        |      |      |
| HETATM | 7329 | C2 | PRP | 480 | 45.072 | 20.749 | 25.954 | 1.00 | 0.00 |
| C      |      |    |     |     |        |        |        |      |      |
| HETATM | 7330 | H4 | PRP | 480 | 46.032 | 20.913 | 26.444 | 1.00 | 0.00 |
| H      |      |    |     |     |        |        |        |      |      |
| HETATM | 7331 | O2 | PRP | 480 | 45.279 | 21.046 | 24.588 | 1.00 | 0.00 |
| O      |      |    |     |     |        |        |        |      |      |
| HETATM | 7332 | H5 | PRP | 480 | 45.757 | 20.286 | 24.249 | 1.00 | 0.00 |
| H      |      |    |     |     |        |        |        |      |      |
| HETATM | 7333 | C3 | PRP | 480 | 44.540 | 19.334 | 26.201 | 1.00 | 0.00 |
| C      |      |    |     |     |        |        |        |      |      |
| HETATM | 7334 | H6 | PRP | 480 | 45.303 | 18.634 | 25.859 | 1.00 | 0.00 |
| H      |      |    |     |     |        |        |        |      |      |
| HETATM | 7335 | H7 | PRP | 480 | 44.139 | 19.323 | 27.215 | 1.00 | 0.00 |
| H      |      |    |     |     |        |        |        |      |      |

|        |      |    |     |     |        |        |        |      |      |
|--------|------|----|-----|-----|--------|--------|--------|------|------|
| HETATM | 7336 | H8 | PRP | 480 | 43.720 | 19.159 | 25.505 | 1.00 | 0.00 |
| H      |      |    |     |     |        |        |        |      |      |
| HETATM | 7337 | O1 | PRP | 481 | 19.952 | 17.097 | 46.961 | 1.00 | 0.00 |
| O      |      |    |     |     |        |        |        |      |      |
| HETATM | 7338 | H1 | PRP | 481 | 20.456 | 17.336 | 47.742 | 1.00 | 0.00 |
| H      |      |    |     |     |        |        |        |      |      |
| HETATM | 7339 | C1 | PRP | 481 | 18.679 | 17.717 | 47.206 | 1.00 | 0.00 |
| C      |      |    |     |     |        |        |        |      |      |
| HETATM | 7340 | H2 | PRP | 481 | 17.978 | 17.324 | 46.469 | 1.00 | 0.00 |
| H      |      |    |     |     |        |        |        |      |      |
| HETATM | 7341 | H3 | PRP | 481 | 18.289 | 17.454 | 48.189 | 1.00 | 0.00 |
| H      |      |    |     |     |        |        |        |      |      |
| HETATM | 7342 | C2 | PRP | 481 | 18.689 | 19.211 | 46.813 | 1.00 | 0.00 |
| C      |      |    |     |     |        |        |        |      |      |
| HETATM | 7343 | H4 | PRP | 481 | 18.866 | 19.341 | 45.745 | 1.00 | 0.00 |
| H      |      |    |     |     |        |        |        |      |      |
| HETATM | 7344 | O2 | PRP | 481 | 19.765 | 19.928 | 47.481 | 1.00 | 0.00 |
| O      |      |    |     |     |        |        |        |      |      |
| HETATM | 7345 | H5 | PRP | 481 | 19.662 | 19.742 | 48.418 | 1.00 | 0.00 |
| H      |      |    |     |     |        |        |        |      |      |
| HETATM | 7346 | C3 | PRP | 481 | 17.293 | 19.892 | 46.988 | 1.00 | 0.00 |
| C      |      |    |     |     |        |        |        |      |      |
| HETATM | 7347 | H6 | PRP | 481 | 16.520 | 19.257 | 46.554 | 1.00 | 0.00 |
| H      |      |    |     |     |        |        |        |      |      |
| HETATM | 7348 | H7 | PRP | 481 | 17.070 | 20.023 | 48.047 | 1.00 | 0.00 |
| H      |      |    |     |     |        |        |        |      |      |
| HETATM | 7349 | H8 | PRP | 481 | 17.132 | 20.831 | 46.458 | 1.00 | 0.00 |
| H      |      |    |     |     |        |        |        |      |      |
| HETATM | 7350 | O1 | PRP | 482 | 24.665 | 22.350 | 30.967 | 1.00 | 0.00 |
| O      |      |    |     |     |        |        |        |      |      |
| HETATM | 7351 | H1 | PRP | 482 | 24.910 | 21.506 | 30.580 | 1.00 | 0.00 |
| H      |      |    |     |     |        |        |        |      |      |
| HETATM | 7352 | C1 | PRP | 482 | 23.249 | 22.660 | 31.031 | 1.00 | 0.00 |
| C      |      |    |     |     |        |        |        |      |      |
| HETATM | 7353 | H2 | PRP | 482 | 22.938 | 22.902 | 32.047 | 1.00 | 0.00 |
| H      |      |    |     |     |        |        |        |      |      |
| HETATM | 7354 | H3 | PRP | 482 | 23.196 | 23.542 | 30.392 | 1.00 | 0.00 |
| H      |      |    |     |     |        |        |        |      |      |
| HETATM | 7355 | C2 | PRP | 482 | 22.468 | 21.524 | 30.290 | 1.00 | 0.00 |
| C      |      |    |     |     |        |        |        |      |      |
| HETATM | 7356 | H4 | PRP | 482 | 22.214 | 20.687 | 30.941 | 1.00 | 0.00 |
| H      |      |    |     |     |        |        |        |      |      |
| HETATM | 7357 | O2 | PRP | 482 | 23.236 | 20.933 | 29.185 | 1.00 | 0.00 |
| O      |      |    |     |     |        |        |        |      |      |
| HETATM | 7358 | H5 | PRP | 482 | 22.574 | 20.378 | 28.767 | 1.00 | 0.00 |
| H      |      |    |     |     |        |        |        |      |      |
| HETATM | 7359 | C3 | PRP | 482 | 21.143 | 21.934 | 29.728 | 1.00 | 0.00 |
| C      |      |    |     |     |        |        |        |      |      |
| HETATM | 7360 | H6 | PRP | 482 | 20.735 | 22.666 | 30.425 | 1.00 | 0.00 |
| H      |      |    |     |     |        |        |        |      |      |
| HETATM | 7361 | H7 | PRP | 482 | 21.359 | 22.443 | 28.789 | 1.00 | 0.00 |
| H      |      |    |     |     |        |        |        |      |      |
| HETATM | 7362 | H8 | PRP | 482 | 20.447 | 21.100 | 29.640 | 1.00 | 0.00 |
| H      |      |    |     |     |        |        |        |      |      |
| HETATM | 7363 | O1 | PRP | 483 | 16.020 | 38.785 | 41.486 | 1.00 | 0.00 |
| O      |      |    |     |     |        |        |        |      |      |

|        |      |    |     |     |        |        |        |      |      |
|--------|------|----|-----|-----|--------|--------|--------|------|------|
| HETATM | 7364 | H1 | PRP | 483 | 16.904 | 39.123 | 41.644 | 1.00 | 0.00 |
| H      |      |    |     |     |        |        |        |      |      |
| HETATM | 7365 | C1 | PRP | 483 | 14.975 | 39.722 | 41.749 | 1.00 | 0.00 |
| C      |      |    |     |     |        |        |        |      |      |
| HETATM | 7366 | H2 | PRP | 483 | 14.308 | 39.281 | 42.489 | 1.00 | 0.00 |
| H      |      |    |     |     |        |        |        |      |      |
| HETATM | 7367 | H3 | PRP | 483 | 15.475 | 40.633 | 42.080 | 1.00 | 0.00 |
| H      |      |    |     |     |        |        |        |      |      |
| HETATM | 7368 | C2 | PRP | 483 | 14.084 | 39.856 | 40.503 | 1.00 | 0.00 |
| C      |      |    |     |     |        |        |        |      |      |
| HETATM | 7369 | H4 | PRP | 483 | 13.746 | 38.839 | 40.299 | 1.00 | 0.00 |
| H      |      |    |     |     |        |        |        |      |      |
| HETATM | 7370 | O2 | PRP | 483 | 14.768 | 40.272 | 39.333 | 1.00 | 0.00 |
| O      |      |    |     |     |        |        |        |      |      |
| HETATM | 7371 | H5 | PRP | 483 | 15.492 | 39.707 | 39.051 | 1.00 | 0.00 |
| H      |      |    |     |     |        |        |        |      |      |
| HETATM | 7372 | C3 | PRP | 483 | 12.963 | 40.756 | 40.751 | 1.00 | 0.00 |
| C      |      |    |     |     |        |        |        |      |      |
| HETATM | 7373 | H6 | PRP | 483 | 13.180 | 41.824 | 40.731 | 1.00 | 0.00 |
| H      |      |    |     |     |        |        |        |      |      |
| HETATM | 7374 | H7 | PRP | 483 | 12.260 | 40.575 | 39.938 | 1.00 | 0.00 |
| H      |      |    |     |     |        |        |        |      |      |
| HETATM | 7375 | H8 | PRP | 483 | 12.399 | 40.463 | 41.636 | 1.00 | 0.00 |
| H      |      |    |     |     |        |        |        |      |      |
| HETATM | 7376 | O1 | PRP | 484 | 26.943 | 39.426 | 37.113 | 1.00 | 0.00 |
| O      |      |    |     |     |        |        |        |      |      |
| HETATM | 7377 | H1 | PRP | 484 | 27.777 | 39.850 | 37.329 | 1.00 | 0.00 |
| H      |      |    |     |     |        |        |        |      |      |
| HETATM | 7378 | C1 | PRP | 484 | 26.166 | 39.542 | 38.261 | 1.00 | 0.00 |
| C      |      |    |     |     |        |        |        |      |      |
| HETATM | 7379 | H2 | PRP | 484 | 26.590 | 38.939 | 39.065 | 1.00 | 0.00 |
| H      |      |    |     |     |        |        |        |      |      |
| HETATM | 7380 | H3 | PRP | 484 | 26.340 | 40.520 | 38.708 | 1.00 | 0.00 |
| H      |      |    |     |     |        |        |        |      |      |
| HETATM | 7381 | C2 | PRP | 484 | 24.674 | 39.223 | 38.051 | 1.00 | 0.00 |
| C      |      |    |     |     |        |        |        |      |      |
| HETATM | 7382 | H4 | PRP | 484 | 24.510 | 38.250 | 37.588 | 1.00 | 0.00 |
| H      |      |    |     |     |        |        |        |      |      |
| HETATM | 7383 | O2 | PRP | 484 | 24.245 | 40.240 | 37.151 | 1.00 | 0.00 |
| O      |      |    |     |     |        |        |        |      |      |
| HETATM | 7384 | H5 | PRP | 484 | 24.795 | 40.159 | 36.368 | 1.00 | 0.00 |
| H      |      |    |     |     |        |        |        |      |      |
| HETATM | 7385 | C3 | PRP | 484 | 23.824 | 39.333 | 39.388 | 1.00 | 0.00 |
| C      |      |    |     |     |        |        |        |      |      |
| HETATM | 7386 | H6 | PRP | 484 | 24.081 | 38.576 | 40.128 | 1.00 | 0.00 |
| H      |      |    |     |     |        |        |        |      |      |
| HETATM | 7387 | H7 | PRP | 484 | 24.015 | 40.305 | 39.843 | 1.00 | 0.00 |
| H      |      |    |     |     |        |        |        |      |      |
| HETATM | 7388 | H8 | PRP | 484 | 22.762 | 39.505 | 39.216 | 1.00 | 0.00 |
| H      |      |    |     |     |        |        |        |      |      |
| HETATM | 7389 | O1 | PRP | 485 | 23.887 | 39.568 | 32.658 | 1.00 | 0.00 |
| O      |      |    |     |     |        |        |        |      |      |
| HETATM | 7390 | H1 | PRP | 485 | 24.332 | 38.970 | 33.263 | 1.00 | 0.00 |
| H      |      |    |     |     |        |        |        |      |      |
| HETATM | 7391 | C1 | PRP | 485 | 24.239 | 40.871 | 33.216 | 1.00 | 0.00 |
| C      |      |    |     |     |        |        |        |      |      |

|        |      |    |     |     |        |        |        |      |      |
|--------|------|----|-----|-----|--------|--------|--------|------|------|
| HETATM | 7392 | H2 | PRP | 485 | 24.286 | 41.656 | 32.461 | 1.00 | 0.00 |
| H      |      |    |     |     |        |        |        |      |      |
| HETATM | 7393 | H3 | PRP | 485 | 23.687 | 41.131 | 34.119 | 1.00 | 0.00 |
| H      |      |    |     |     |        |        |        |      |      |
| HETATM | 7394 | C2 | PRP | 485 | 25.686 | 40.817 | 33.705 | 1.00 | 0.00 |
| C      |      |    |     |     |        |        |        |      |      |
| HETATM | 7395 | H4 | PRP | 485 | 26.287 | 40.837 | 32.796 | 1.00 | 0.00 |
| H      |      |    |     |     |        |        |        |      |      |
| HETATM | 7396 | O2 | PRP | 485 | 26.015 | 39.682 | 34.473 | 1.00 | 0.00 |
| O      |      |    |     |     |        |        |        |      |      |
| HETATM | 7397 | H5 | PRP | 485 | 26.974 | 39.650 | 34.503 | 1.00 | 0.00 |
| H      |      |    |     |     |        |        |        |      |      |
| HETATM | 7398 | C3 | PRP | 485 | 26.191 | 42.067 | 34.455 | 1.00 | 0.00 |
| C      |      |    |     |     |        |        |        |      |      |
| HETATM | 7399 | H6 | PRP | 485 | 27.239 | 41.986 | 34.743 | 1.00 | 0.00 |
| H      |      |    |     |     |        |        |        |      |      |
| HETATM | 7400 | H7 | PRP | 485 | 26.128 | 42.918 | 33.777 | 1.00 | 0.00 |
| H      |      |    |     |     |        |        |        |      |      |
| HETATM | 7401 | H8 | PRP | 485 | 25.485 | 42.232 | 35.269 | 1.00 | 0.00 |
| H      |      |    |     |     |        |        |        |      |      |
| HETATM | 7402 | O1 | PRP | 486 | 15.236 | 46.249 | 40.224 | 1.00 | 0.00 |
| O      |      |    |     |     |        |        |        |      |      |
| HETATM | 7403 | H1 | PRP | 486 | 15.066 | 45.305 | 40.190 | 1.00 | 0.00 |
| H      |      |    |     |     |        |        |        |      |      |
| HETATM | 7404 | C1 | PRP | 486 | 14.850 | 46.759 | 41.490 | 1.00 | 0.00 |
| C      |      |    |     |     |        |        |        |      |      |
| HETATM | 7405 | H2 | PRP | 486 | 14.073 | 46.141 | 41.940 | 1.00 | 0.00 |
| H      |      |    |     |     |        |        |        |      |      |
| HETATM | 7406 | H3 | PRP | 486 | 15.711 | 46.741 | 42.159 | 1.00 | 0.00 |
| H      |      |    |     |     |        |        |        |      |      |
| HETATM | 7407 | C2 | PRP | 486 | 14.357 | 48.210 | 41.277 | 1.00 | 0.00 |
| C      |      |    |     |     |        |        |        |      |      |
| HETATM | 7408 | H4 | PRP | 486 | 13.521 | 48.194 | 40.578 | 1.00 | 0.00 |
| H      |      |    |     |     |        |        |        |      |      |
| HETATM | 7409 | O2 | PRP | 486 | 15.437 | 49.008 | 40.862 | 1.00 | 0.00 |
| O      |      |    |     |     |        |        |        |      |      |
| HETATM | 7410 | H5 | PRP | 486 | 15.521 | 48.961 | 39.907 | 1.00 | 0.00 |
| H      |      |    |     |     |        |        |        |      |      |
| HETATM | 7411 | C3 | PRP | 486 | 13.849 | 48.865 | 42.571 | 1.00 | 0.00 |
| C      |      |    |     |     |        |        |        |      |      |
| HETATM | 7412 | H6 | PRP | 486 | 13.638 | 49.910 | 42.343 | 1.00 | 0.00 |
| H      |      |    |     |     |        |        |        |      |      |
| HETATM | 7413 | H7 | PRP | 486 | 12.946 | 48.383 | 42.945 | 1.00 | 0.00 |
| H      |      |    |     |     |        |        |        |      |      |
| HETATM | 7414 | H8 | PRP | 486 | 14.642 | 48.942 | 43.315 | 1.00 | 0.00 |
| H      |      |    |     |     |        |        |        |      |      |
| HETATM | 7415 | O1 | PRP | 487 | 10.068 | 28.045 | 36.147 | 1.00 | 0.00 |
| O      |      |    |     |     |        |        |        |      |      |
| HETATM | 7416 | H1 | PRP | 487 | 9.485  | 27.718 | 35.458 | 1.00 | 0.00 |
| H      |      |    |     |     |        |        |        |      |      |
| HETATM | 7417 | C1 | PRP | 487 | 11.387 | 27.679 | 35.906 | 1.00 | 0.00 |
| C      |      |    |     |     |        |        |        |      |      |
| HETATM | 7418 | H2 | PRP | 487 | 11.736 | 27.068 | 36.738 | 1.00 | 0.00 |
| H      |      |    |     |     |        |        |        |      |      |
| HETATM | 7419 | H3 | PRP | 487 | 11.434 | 27.041 | 35.023 | 1.00 | 0.00 |
| H      |      |    |     |     |        |        |        |      |      |

|        |      |    |     |     |        |        |        |      |      |
|--------|------|----|-----|-----|--------|--------|--------|------|------|
| HETATM | 7420 | C2 | PRP | 487 | 12.293 | 28.915 | 35.742 | 1.00 | 0.00 |
| C      |      |    |     |     |        |        |        |      |      |
| HETATM | 7421 | H4 | PRP | 487 | 12.070 | 29.591 | 36.567 | 1.00 | 0.00 |
| H      |      |    |     |     |        |        |        |      |      |
| HETATM | 7422 | O2 | PRP | 487 | 11.937 | 29.440 | 34.504 | 1.00 | 0.00 |
| O      |      |    |     |     |        |        |        |      |      |
| HETATM | 7423 | H5 | PRP | 487 | 11.185 | 29.043 | 34.059 | 1.00 | 0.00 |
| H      |      |    |     |     |        |        |        |      |      |
| HETATM | 7424 | C3 | PRP | 487 | 13.767 | 28.391 | 35.781 | 1.00 | 0.00 |
| C      |      |    |     |     |        |        |        |      |      |
| HETATM | 7425 | H6 | PRP | 487 | 14.087 | 27.929 | 34.847 | 1.00 | 0.00 |
| H      |      |    |     |     |        |        |        |      |      |
| HETATM | 7426 | H7 | PRP | 487 | 14.455 | 29.205 | 36.010 | 1.00 | 0.00 |
| H      |      |    |     |     |        |        |        |      |      |
| HETATM | 7427 | H8 | PRP | 487 | 13.907 | 27.665 | 36.582 | 1.00 | 0.00 |
| H      |      |    |     |     |        |        |        |      |      |
| HETATM | 7428 | O1 | PRP | 488 | 20.030 | 29.653 | 17.032 | 1.00 | 0.00 |
| O      |      |    |     |     |        |        |        |      |      |
| HETATM | 7429 | H1 | PRP | 488 | 20.977 | 29.809 | 17.073 | 1.00 | 0.00 |
| H      |      |    |     |     |        |        |        |      |      |
| HETATM | 7430 | C1 | PRP | 488 | 19.882 | 29.108 | 15.715 | 1.00 | 0.00 |
| C      |      |    |     |     |        |        |        |      |      |
| HETATM | 7431 | H2 | PRP | 488 | 18.824 | 29.233 | 15.484 | 1.00 | 0.00 |
| H      |      |    |     |     |        |        |        |      |      |
| HETATM | 7432 | H3 | PRP | 488 | 20.453 | 29.762 | 15.056 | 1.00 | 0.00 |
| H      |      |    |     |     |        |        |        |      |      |
| HETATM | 7433 | C2 | PRP | 488 | 20.270 | 27.684 | 15.807 | 1.00 | 0.00 |
| C      |      |    |     |     |        |        |        |      |      |
| HETATM | 7434 | H4 | PRP | 488 | 19.650 | 27.250 | 16.592 | 1.00 | 0.00 |
| H      |      |    |     |     |        |        |        |      |      |
| HETATM | 7435 | O2 | PRP | 488 | 21.649 | 27.668 | 16.046 | 1.00 | 0.00 |
| O      |      |    |     |     |        |        |        |      |      |
| HETATM | 7436 | H5 | PRP | 488 | 21.928 | 26.859 | 16.480 | 1.00 | 0.00 |
| H      |      |    |     |     |        |        |        |      |      |
| HETATM | 7437 | C3 | PRP | 488 | 20.067 | 26.998 | 14.497 | 1.00 | 0.00 |
| C      |      |    |     |     |        |        |        |      |      |
| HETATM | 7438 | H6 | PRP | 488 | 20.524 | 26.009 | 14.532 | 1.00 | 0.00 |
| H      |      |    |     |     |        |        |        |      |      |
| HETATM | 7439 | H7 | PRP | 488 | 19.001 | 26.895 | 14.295 | 1.00 | 0.00 |
| H      |      |    |     |     |        |        |        |      |      |
| HETATM | 7440 | H8 | PRP | 488 | 20.458 | 27.510 | 13.618 | 1.00 | 0.00 |
| H      |      |    |     |     |        |        |        |      |      |
| HETATM | 7441 | O1 | PRP | 489 | 26.658 | 22.474 | 36.309 | 1.00 | 0.00 |
| O      |      |    |     |     |        |        |        |      |      |
| HETATM | 7442 | H1 | PRP | 489 | 26.738 | 22.790 | 37.212 | 1.00 | 0.00 |
| H      |      |    |     |     |        |        |        |      |      |
| HETATM | 7443 | C1 | PRP | 489 | 27.878 | 21.956 | 35.795 | 1.00 | 0.00 |
| C      |      |    |     |     |        |        |        |      |      |
| HETATM | 7444 | H2 | PRP | 489 | 28.603 | 22.757 | 35.651 | 1.00 | 0.00 |
| H      |      |    |     |     |        |        |        |      |      |
| HETATM | 7445 | H3 | PRP | 489 | 28.298 | 21.346 | 36.594 | 1.00 | 0.00 |
| H      |      |    |     |     |        |        |        |      |      |
| HETATM | 7446 | C2 | PRP | 489 | 27.702 | 21.164 | 34.496 | 1.00 | 0.00 |
| C      |      |    |     |     |        |        |        |      |      |
| HETATM | 7447 | H4 | PRP | 489 | 28.598 | 20.567 | 34.330 | 1.00 | 0.00 |
| H      |      |    |     |     |        |        |        |      |      |

|        |      |    |     |     |        |        |        |      |      |
|--------|------|----|-----|-----|--------|--------|--------|------|------|
| HETATM | 7448 | O2 | PRP | 489 | 27.354 | 21.971 | 33.400 | 1.00 | 0.00 |
| O      |      |    |     |     |        |        |        |      |      |
| HETATM | 7449 | H5 | PRP | 489 | 26.721 | 22.672 | 33.570 | 1.00 | 0.00 |
| H      |      |    |     |     |        |        |        |      |      |
| HETATM | 7450 | C3 | PRP | 489 | 26.565 | 20.193 | 34.622 | 1.00 | 0.00 |
| C      |      |    |     |     |        |        |        |      |      |
| HETATM | 7451 | H6 | PRP | 489 | 25.619 | 20.649 | 34.330 | 1.00 | 0.00 |
| H      |      |    |     |     |        |        |        |      |      |
| HETATM | 7452 | H7 | PRP | 489 | 26.840 | 19.461 | 33.862 | 1.00 | 0.00 |
| H      |      |    |     |     |        |        |        |      |      |
| HETATM | 7453 | H8 | PRP | 489 | 26.559 | 19.762 | 35.623 | 1.00 | 0.00 |
| H      |      |    |     |     |        |        |        |      |      |
| HETATM | 7454 | O1 | PRP | 490 | 24.718 | 44.772 | 27.465 | 1.00 | 0.00 |
| O      |      |    |     |     |        |        |        |      |      |
| HETATM | 7455 | H1 | PRP | 490 | 23.900 | 44.274 | 27.397 | 1.00 | 0.00 |
| H      |      |    |     |     |        |        |        |      |      |
| HETATM | 7456 | C1 | PRP | 490 | 25.885 | 43.988 | 27.344 | 1.00 | 0.00 |
| C      |      |    |     |     |        |        |        |      |      |
| HETATM | 7457 | H2 | PRP | 490 | 26.145 | 43.876 | 26.291 | 1.00 | 0.00 |
| H      |      |    |     |     |        |        |        |      |      |
| HETATM | 7458 | H3 | PRP | 490 | 26.644 | 44.406 | 28.006 | 1.00 | 0.00 |
| H      |      |    |     |     |        |        |        |      |      |
| HETATM | 7459 | C2 | PRP | 490 | 25.572 | 42.624 | 28.051 | 1.00 | 0.00 |
| C      |      |    |     |     |        |        |        |      |      |
| HETATM | 7460 | H4 | PRP | 490 | 26.414 | 41.966 | 27.837 | 1.00 | 0.00 |
| H      |      |    |     |     |        |        |        |      |      |
| HETATM | 7461 | O2 | PRP | 490 | 24.312 | 42.180 | 27.450 | 1.00 | 0.00 |
| O      |      |    |     |     |        |        |        |      |      |
| HETATM | 7462 | H5 | PRP | 490 | 24.207 | 41.255 | 27.216 | 1.00 | 0.00 |
| H      |      |    |     |     |        |        |        |      |      |
| HETATM | 7463 | C3 | PRP | 490 | 25.174 | 42.669 | 29.487 | 1.00 | 0.00 |
| C      |      |    |     |     |        |        |        |      |      |
| HETATM | 7464 | H6 | PRP | 490 | 25.065 | 41.639 | 29.827 | 1.00 | 0.00 |
| H      |      |    |     |     |        |        |        |      |      |
| HETATM | 7465 | H7 | PRP | 490 | 26.073 | 42.997 | 30.009 | 1.00 | 0.00 |
| H      |      |    |     |     |        |        |        |      |      |
| HETATM | 7466 | H8 | PRP | 490 | 24.377 | 43.342 | 29.803 | 1.00 | 0.00 |
| H      |      |    |     |     |        |        |        |      |      |
| HETATM | 7467 | O1 | PRP | 491 | 31.840 | 42.434 | 26.752 | 1.00 | 0.00 |
| O      |      |    |     |     |        |        |        |      |      |
| HETATM | 7468 | H1 | PRP | 491 | 31.738 | 41.481 | 26.692 | 1.00 | 0.00 |
| H      |      |    |     |     |        |        |        |      |      |
| HETATM | 7469 | C1 | PRP | 491 | 31.224 | 43.013 | 27.840 | 1.00 | 0.00 |
| C      |      |    |     |     |        |        |        |      |      |
| HETATM | 7470 | H2 | PRP | 491 | 31.802 | 42.710 | 28.714 | 1.00 | 0.00 |
| H      |      |    |     |     |        |        |        |      |      |
| HETATM | 7471 | H3 | PRP | 491 | 31.350 | 44.082 | 27.670 | 1.00 | 0.00 |
| H      |      |    |     |     |        |        |        |      |      |
| HETATM | 7472 | C2 | PRP | 491 | 29.753 | 42.587 | 28.059 | 1.00 | 0.00 |
| C      |      |    |     |     |        |        |        |      |      |
| HETATM | 7473 | H4 | PRP | 491 | 29.858 | 41.541 | 28.347 | 1.00 | 0.00 |
| H      |      |    |     |     |        |        |        |      |      |
| HETATM | 7474 | O2 | PRP | 491 | 28.844 | 42.722 | 26.990 | 1.00 | 0.00 |
| O      |      |    |     |     |        |        |        |      |      |
| HETATM | 7475 | H5 | PRP | 491 | 28.932 | 43.544 | 26.503 | 1.00 | 0.00 |
| H      |      |    |     |     |        |        |        |      |      |

|        |      |    |     |     |        |        |        |      |      |
|--------|------|----|-----|-----|--------|--------|--------|------|------|
| HETATM | 7476 | C3 | PRP | 491 | 29.072 | 43.254 | 29.351 | 1.00 | 0.00 |
| C      |      |    |     |     |        |        |        |      |      |
| HETATM | 7477 | H6 | PRP | 491 | 28.375 | 42.487 | 29.688 | 1.00 | 0.00 |
| H      |      |    |     |     |        |        |        |      |      |
| HETATM | 7478 | H7 | PRP | 491 | 29.846 | 43.456 | 30.091 | 1.00 | 0.00 |
| H      |      |    |     |     |        |        |        |      |      |
| HETATM | 7479 | H8 | PRP | 491 | 28.531 | 44.134 | 29.002 | 1.00 | 0.00 |
| H      |      |    |     |     |        |        |        |      |      |
| HETATM | 7480 | O1 | PRP | 492 | 19.812 | 18.735 | 38.577 | 1.00 | 0.00 |
| O      |      |    |     |     |        |        |        |      |      |
| HETATM | 7481 | H1 | PRP | 492 | 19.662 | 18.609 | 39.517 | 1.00 | 0.00 |
| H      |      |    |     |     |        |        |        |      |      |
| HETATM | 7482 | C1 | PRP | 492 | 18.511 | 18.971 | 38.030 | 1.00 | 0.00 |
| C      |      |    |     |     |        |        |        |      |      |
| HETATM | 7483 | H2 | PRP | 492 | 18.742 | 19.384 | 37.048 | 1.00 | 0.00 |
| H      |      |    |     |     |        |        |        |      |      |
| HETATM | 7484 | H3 | PRP | 492 | 17.978 | 18.045 | 37.815 | 1.00 | 0.00 |
| H      |      |    |     |     |        |        |        |      |      |
| HETATM | 7485 | C2 | PRP | 492 | 17.718 | 19.997 | 38.782 | 1.00 | 0.00 |
| C      |      |    |     |     |        |        |        |      |      |
| HETATM | 7486 | H4 | PRP | 492 | 18.361 | 20.850 | 38.999 | 1.00 | 0.00 |
| H      |      |    |     |     |        |        |        |      |      |
| HETATM | 7487 | O2 | PRP | 492 | 17.321 | 19.484 | 40.020 | 1.00 | 0.00 |
| O      |      |    |     |     |        |        |        |      |      |
| HETATM | 7488 | H5 | PRP | 492 | 16.642 | 20.016 | 40.442 | 1.00 | 0.00 |
| H      |      |    |     |     |        |        |        |      |      |
| HETATM | 7489 | C3 | PRP | 492 | 16.532 | 20.476 | 38.012 | 1.00 | 0.00 |
| C      |      |    |     |     |        |        |        |      |      |
| HETATM | 7490 | H6 | PRP | 492 | 15.851 | 21.050 | 38.640 | 1.00 | 0.00 |
| H      |      |    |     |     |        |        |        |      |      |
| HETATM | 7491 | H7 | PRP | 492 | 16.951 | 21.035 | 37.175 | 1.00 | 0.00 |
| H      |      |    |     |     |        |        |        |      |      |
| HETATM | 7492 | H8 | PRP | 492 | 15.883 | 19.679 | 37.648 | 1.00 | 0.00 |
| H      |      |    |     |     |        |        |        |      |      |
| HETATM | 7493 | O1 | PRP | 493 | 23.145 | 19.653 | 24.860 | 1.00 | 0.00 |
| O      |      |    |     |     |        |        |        |      |      |
| HETATM | 7494 | H1 | PRP | 493 | 23.925 | 20.079 | 24.497 | 1.00 | 0.00 |
| H      |      |    |     |     |        |        |        |      |      |
| HETATM | 7495 | C1 | PRP | 493 | 22.015 | 20.077 | 24.130 | 1.00 | 0.00 |
| C      |      |    |     |     |        |        |        |      |      |
| HETATM | 7496 | H2 | PRP | 493 | 21.898 | 19.545 | 23.185 | 1.00 | 0.00 |
| H      |      |    |     |     |        |        |        |      |      |
| HETATM | 7497 | H3 | PRP | 493 | 21.081 | 19.770 | 24.601 | 1.00 | 0.00 |
| H      |      |    |     |     |        |        |        |      |      |
| HETATM | 7498 | C2 | PRP | 493 | 21.911 | 21.555 | 23.858 | 1.00 | 0.00 |
| C      |      |    |     |     |        |        |        |      |      |
| HETATM | 7499 | H4 | PRP | 493 | 21.010 | 21.720 | 23.267 | 1.00 | 0.00 |
| H      |      |    |     |     |        |        |        |      |      |
| HETATM | 7500 | O2 | PRP | 493 | 22.911 | 21.935 | 22.931 | 1.00 | 0.00 |
| O      |      |    |     |     |        |        |        |      |      |
| HETATM | 7501 | H5 | PRP | 493 | 23.763 | 21.758 | 23.338 | 1.00 | 0.00 |
| H      |      |    |     |     |        |        |        |      |      |
| HETATM | 7502 | C3 | PRP | 493 | 21.922 | 22.504 | 25.116 | 1.00 | 0.00 |
| C      |      |    |     |     |        |        |        |      |      |
| HETATM | 7503 | H6 | PRP | 493 | 22.650 | 22.219 | 25.876 | 1.00 | 0.00 |
| H      |      |    |     |     |        |        |        |      |      |

|        |      |    |     |     |        |        |        |      |      |
|--------|------|----|-----|-----|--------|--------|--------|------|------|
| HETATM | 7504 | H7 | PRP | 493 | 22.021 | 23.529 | 24.759 | 1.00 | 0.00 |
| H      |      |    |     |     |        |        |        |      |      |
| HETATM | 7505 | H8 | PRP | 493 | 20.924 | 22.536 | 25.553 | 1.00 | 0.00 |
| H      |      |    |     |     |        |        |        |      |      |
| HETATM | 7506 | O1 | PRP | 494 | 21.936 | 25.292 | 17.578 | 1.00 | 0.00 |
| O      |      |    |     |     |        |        |        |      |      |
| HETATM | 7507 | H1 | PRP | 494 | 21.083 | 25.020 | 17.924 | 1.00 | 0.00 |
| H      |      |    |     |     |        |        |        |      |      |
| HETATM | 7508 | C1 | PRP | 494 | 22.682 | 25.977 | 18.639 | 1.00 | 0.00 |
| C      |      |    |     |     |        |        |        |      |      |
| HETATM | 7509 | H2 | PRP | 494 | 23.449 | 25.293 | 19.002 | 1.00 | 0.00 |
| H      |      |    |     |     |        |        |        |      |      |
| HETATM | 7510 | H3 | PRP | 494 | 23.208 | 26.861 | 18.279 | 1.00 | 0.00 |
| H      |      |    |     |     |        |        |        |      |      |
| HETATM | 7511 | C2 | PRP | 494 | 21.787 | 26.386 | 19.832 | 1.00 | 0.00 |
| C      |      |    |     |     |        |        |        |      |      |
| HETATM | 7512 | H4 | PRP | 494 | 22.368 | 26.710 | 20.696 | 1.00 | 0.00 |
| H      |      |    |     |     |        |        |        |      |      |
| HETATM | 7513 | O2 | PRP | 494 | 20.895 | 25.256 | 20.007 | 1.00 | 0.00 |
| O      |      |    |     |     |        |        |        |      |      |
| HETATM | 7514 | H5 | PRP | 494 | 21.410 | 24.613 | 20.498 | 1.00 | 0.00 |
| H      |      |    |     |     |        |        |        |      |      |
| HETATM | 7515 | C3 | PRP | 494 | 20.896 | 27.568 | 19.499 | 1.00 | 0.00 |
| C      |      |    |     |     |        |        |        |      |      |
| HETATM | 7516 | H6 | PRP | 494 | 21.442 | 28.263 | 18.860 | 1.00 | 0.00 |
| H      |      |    |     |     |        |        |        |      |      |
| HETATM | 7517 | H7 | PRP | 494 | 19.908 | 27.407 | 19.069 | 1.00 | 0.00 |
| H      |      |    |     |     |        |        |        |      |      |
| HETATM | 7518 | H8 | PRP | 494 | 20.646 | 28.050 | 20.444 | 1.00 | 0.00 |
| H      |      |    |     |     |        |        |        |      |      |
| HETATM | 7519 | O1 | PRP | 495 | 30.878 | 36.992 | 26.029 | 1.00 | 0.00 |
| O      |      |    |     |     |        |        |        |      |      |
| HETATM | 7520 | H1 | PRP | 495 | 30.594 | 36.326 | 25.399 | 1.00 | 0.00 |
| H      |      |    |     |     |        |        |        |      |      |
| HETATM | 7521 | C1 | PRP | 495 | 29.903 | 38.013 | 26.149 | 1.00 | 0.00 |
| C      |      |    |     |     |        |        |        |      |      |
| HETATM | 7522 | H2 | PRP | 495 | 29.598 | 38.400 | 25.177 | 1.00 | 0.00 |
| H      |      |    |     |     |        |        |        |      |      |
| HETATM | 7523 | H3 | PRP | 495 | 28.963 | 37.563 | 26.470 | 1.00 | 0.00 |
| H      |      |    |     |     |        |        |        |      |      |
| HETATM | 7524 | C2 | PRP | 495 | 30.353 | 39.148 | 26.999 | 1.00 | 0.00 |
| C      |      |    |     |     |        |        |        |      |      |
| HETATM | 7525 | H4 | PRP | 495 | 29.502 | 39.793 | 27.217 | 1.00 | 0.00 |
| H      |      |    |     |     |        |        |        |      |      |
| HETATM | 7526 | O2 | PRP | 495 | 31.342 | 39.922 | 26.291 | 1.00 | 0.00 |
| O      |      |    |     |     |        |        |        |      |      |
| HETATM | 7527 | H5 | PRP | 495 | 32.017 | 39.314 | 25.981 | 1.00 | 0.00 |
| H      |      |    |     |     |        |        |        |      |      |
| HETATM | 7528 | C3 | PRP | 495 | 30.942 | 38.743 | 28.395 | 1.00 | 0.00 |
| C      |      |    |     |     |        |        |        |      |      |
| HETATM | 7529 | H6 | PRP | 495 | 31.713 | 37.980 | 28.293 | 1.00 | 0.00 |
| H      |      |    |     |     |        |        |        |      |      |
| HETATM | 7530 | H7 | PRP | 495 | 31.410 | 39.577 | 28.918 | 1.00 | 0.00 |
| H      |      |    |     |     |        |        |        |      |      |
| HETATM | 7531 | H8 | PRP | 495 | 30.260 | 38.350 | 29.150 | 1.00 | 0.00 |
| H      |      |    |     |     |        |        |        |      |      |



|        |      |    |     |     |        |        |        |      |      |
|--------|------|----|-----|-----|--------|--------|--------|------|------|
| HETATM | 7532 | O1 | PRP | 496 | 28.966 | 37.693 | 22.553 | 1.00 | 0.00 |
| O      |      |    |     |     |        |        |        |      |      |
| HETATM | 7533 | H1 | PRP | 496 | 28.660 | 37.421 | 23.421 | 1.00 | 0.00 |
| H      |      |    |     |     |        |        |        |      |      |
| HETATM | 7534 | C1 | PRP | 496 | 28.040 | 38.690 | 22.152 | 1.00 | 0.00 |
| C      |      |    |     |     |        |        |        |      |      |
| HETATM | 7535 | H2 | PRP | 496 | 28.508 | 39.472 | 21.553 | 1.00 | 0.00 |
| H      |      |    |     |     |        |        |        |      |      |
| HETATM | 7536 | H3 | PRP | 496 | 27.092 | 38.301 | 21.781 | 1.00 | 0.00 |
| H      |      |    |     |     |        |        |        |      |      |
| HETATM | 7537 | C2 | PRP | 496 | 27.686 | 39.348 | 23.517 | 1.00 | 0.00 |
| C      |      |    |     |     |        |        |        |      |      |
| HETATM | 7538 | H4 | PRP | 496 | 28.586 | 39.699 | 24.021 | 1.00 | 0.00 |
| H      |      |    |     |     |        |        |        |      |      |
| HETATM | 7539 | O2 | PRP | 496 | 27.203 | 38.292 | 24.389 | 1.00 | 0.00 |
| O      |      |    |     |     |        |        |        |      |      |
| HETATM | 7540 | H5 | PRP | 496 | 26.524 | 37.777 | 23.946 | 1.00 | 0.00 |
| H      |      |    |     |     |        |        |        |      |      |
| HETATM | 7541 | C3 | PRP | 496 | 26.592 | 40.435 | 23.421 | 1.00 | 0.00 |
| C      |      |    |     |     |        |        |        |      |      |
| HETATM | 7542 | H6 | PRP | 496 | 25.583 | 40.044 | 23.288 | 1.00 | 0.00 |
| H      |      |    |     |     |        |        |        |      |      |
| HETATM | 7543 | H7 | PRP | 496 | 26.551 | 40.971 | 24.369 | 1.00 | 0.00 |
| H      |      |    |     |     |        |        |        |      |      |
| HETATM | 7544 | H8 | PRP | 496 | 26.835 | 41.144 | 22.629 | 1.00 | 0.00 |
| H      |      |    |     |     |        |        |        |      |      |
| HETATM | 7545 | O1 | PRP | 497 | 20.950 | 14.814 | 34.670 | 1.00 | 0.00 |
| O      |      |    |     |     |        |        |        |      |      |
| HETATM | 7546 | H1 | PRP | 497 | 21.165 | 13.933 | 34.355 | 1.00 | 0.00 |
| H      |      |    |     |     |        |        |        |      |      |
| HETATM | 7547 | C1 | PRP | 497 | 19.953 | 15.234 | 33.747 | 1.00 | 0.00 |
| C      |      |    |     |     |        |        |        |      |      |
| HETATM | 7548 | H2 | PRP | 497 | 20.521 | 15.423 | 32.835 | 1.00 | 0.00 |
| H      |      |    |     |     |        |        |        |      |      |
| HETATM | 7549 | H3 | PRP | 497 | 19.403 | 14.316 | 33.544 | 1.00 | 0.00 |
| H      |      |    |     |     |        |        |        |      |      |
| HETATM | 7550 | C2 | PRP | 497 | 19.154 | 16.393 | 34.287 | 1.00 | 0.00 |
| C      |      |    |     |     |        |        |        |      |      |
| HETATM | 7551 | H4 | PRP | 497 | 18.524 | 16.826 | 33.510 | 1.00 | 0.00 |
| H      |      |    |     |     |        |        |        |      |      |
| HETATM | 7552 | O2 | PRP | 497 | 20.033 | 17.401 | 34.738 | 1.00 | 0.00 |
| O      |      |    |     |     |        |        |        |      |      |
| HETATM | 7553 | H5 | PRP | 497 | 20.738 | 16.962 | 35.220 | 1.00 | 0.00 |
| H      |      |    |     |     |        |        |        |      |      |
| HETATM | 7554 | C3 | PRP | 497 | 18.360 | 15.930 | 35.522 | 1.00 | 0.00 |
| C      |      |    |     |     |        |        |        |      |      |
| HETATM | 7555 | H6 | PRP | 497 | 18.934 | 15.389 | 36.274 | 1.00 | 0.00 |
| H      |      |    |     |     |        |        |        |      |      |
| HETATM | 7556 | H7 | PRP | 497 | 17.920 | 16.831 | 35.949 | 1.00 | 0.00 |
| H      |      |    |     |     |        |        |        |      |      |
| HETATM | 7557 | H8 | PRP | 497 | 17.533 | 15.275 | 35.248 | 1.00 | 0.00 |
| H      |      |    |     |     |        |        |        |      |      |
| HETATM | 7558 | O1 | PRP | 498 | 33.207 | 39.606 | 32.762 | 1.00 | 0.00 |
| O      |      |    |     |     |        |        |        |      |      |
| HETATM | 7559 | H1 | PRP | 498 | 32.279 | 39.362 | 32.789 | 1.00 | 0.00 |
| H      |      |    |     |     |        |        |        |      |      |

|        |      |    |     |     |        |        |        |      |      |
|--------|------|----|-----|-----|--------|--------|--------|------|------|
| HETATM | 7560 | C1 | PRP | 498 | 33.573 | 39.550 | 31.373 | 1.00 | 0.00 |
| C      |      |    |     |     |        |        |        |      |      |
| HETATM | 7561 | H2 | PRP | 498 | 32.768 | 40.048 | 30.833 | 1.00 | 0.00 |
| H      |      |    |     |     |        |        |        |      |      |
| HETATM | 7562 | H3 | PRP | 498 | 34.536 | 40.052 | 31.276 | 1.00 | 0.00 |
| H      |      |    |     |     |        |        |        |      |      |
| HETATM | 7563 | C2 | PRP | 498 | 33.832 | 38.133 | 30.625 | 1.00 | 0.00 |
| C      |      |    |     |     |        |        |        |      |      |
| HETATM | 7564 | H4 | PRP | 498 | 34.050 | 38.286 | 29.568 | 1.00 | 0.00 |
| H      |      |    |     |     |        |        |        |      |      |
| HETATM | 7565 | O2 | PRP | 498 | 32.696 | 37.351 | 30.919 | 1.00 | 0.00 |
| O      |      |    |     |     |        |        |        |      |      |
| HETATM | 7566 | H5 | PRP | 498 | 32.607 | 37.517 | 31.860 | 1.00 | 0.00 |
| H      |      |    |     |     |        |        |        |      |      |
| HETATM | 7567 | C3 | PRP | 498 | 35.037 | 37.551 | 31.324 | 1.00 | 0.00 |
| C      |      |    |     |     |        |        |        |      |      |
| HETATM | 7568 | H6 | PRP | 498 | 35.146 | 36.550 | 30.908 | 1.00 | 0.00 |
| H      |      |    |     |     |        |        |        |      |      |
| HETATM | 7569 | H7 | PRP | 498 | 35.928 | 38.080 | 30.986 | 1.00 | 0.00 |
| H      |      |    |     |     |        |        |        |      |      |
| HETATM | 7570 | H8 | PRP | 498 | 34.955 | 37.603 | 32.410 | 1.00 | 0.00 |
| H      |      |    |     |     |        |        |        |      |      |
| HETATM | 7571 | O1 | PRP | 499 | 16.533 | 14.395 | 18.769 | 1.00 | 0.00 |
| O      |      |    |     |     |        |        |        |      |      |
| HETATM | 7572 | H1 | PRP | 499 | 17.218 | 14.034 | 19.337 | 1.00 | 0.00 |
| H      |      |    |     |     |        |        |        |      |      |
| HETATM | 7573 | C1 | PRP | 499 | 15.936 | 15.415 | 19.479 | 1.00 | 0.00 |
| C      |      |    |     |     |        |        |        |      |      |
| HETATM | 7574 | H2 | PRP | 499 | 16.647 | 16.182 | 19.785 | 1.00 | 0.00 |
| H      |      |    |     |     |        |        |        |      |      |
| HETATM | 7575 | H3 | PRP | 499 | 15.370 | 15.921 | 18.698 | 1.00 | 0.00 |
| H      |      |    |     |     |        |        |        |      |      |
| HETATM | 7576 | C2 | PRP | 499 | 14.955 | 15.031 | 20.549 | 1.00 | 0.00 |
| C      |      |    |     |     |        |        |        |      |      |
| HETATM | 7577 | H4 | PRP | 499 | 14.340 | 15.911 | 20.739 | 1.00 | 0.00 |
| H      |      |    |     |     |        |        |        |      |      |
| HETATM | 7578 | O2 | PRP | 499 | 15.530 | 14.724 | 21.718 | 1.00 | 0.00 |
| O      |      |    |     |     |        |        |        |      |      |
| HETATM | 7579 | H5 | PRP | 499 | 16.051 | 13.945 | 21.511 | 1.00 | 0.00 |
| H      |      |    |     |     |        |        |        |      |      |
| HETATM | 7580 | C3 | PRP | 499 | 14.113 | 13.844 | 20.171 | 1.00 | 0.00 |
| C      |      |    |     |     |        |        |        |      |      |
| HETATM | 7581 | H6 | PRP | 499 | 14.670 | 12.939 | 19.929 | 1.00 | 0.00 |
| H      |      |    |     |     |        |        |        |      |      |
| HETATM | 7582 | H7 | PRP | 499 | 13.465 | 13.467 | 20.963 | 1.00 | 0.00 |
| H      |      |    |     |     |        |        |        |      |      |
| HETATM | 7583 | H8 | PRP | 499 | 13.397 | 14.130 | 19.401 | 1.00 | 0.00 |
| H      |      |    |     |     |        |        |        |      |      |
| HETATM | 7584 | O1 | PRP | 500 | 39.176 | 17.094 | 25.661 | 1.00 | 0.00 |
| O      |      |    |     |     |        |        |        |      |      |
| HETATM | 7585 | H1 | PRP | 500 | 39.029 | 17.673 | 26.413 | 1.00 | 0.00 |
| H      |      |    |     |     |        |        |        |      |      |
| HETATM | 7586 | C1 | PRP | 500 | 37.921 | 16.621 | 25.371 | 1.00 | 0.00 |
| C      |      |    |     |     |        |        |        |      |      |
| HETATM | 7587 | H2 | PRP | 500 | 37.876 | 16.067 | 24.433 | 1.00 | 0.00 |
| H      |      |    |     |     |        |        |        |      |      |

|        |      |    |     |     |        |        |        |      |      |
|--------|------|----|-----|-----|--------|--------|--------|------|------|
| HETATM | 7588 | H3 | PRP | 500 | 37.583 | 15.867 | 26.082 | 1.00 | 0.00 |
| H      |      |    |     |     |        |        |        |      |      |
| HETATM | 7589 | C2 | PRP | 500 | 36.993 | 17.892 | 25.524 | 1.00 | 0.00 |
| C      |      |    |     |     |        |        |        |      |      |
| HETATM | 7590 | H4 | PRP | 500 | 37.349 | 18.583 | 24.760 | 1.00 | 0.00 |
| H      |      |    |     |     |        |        |        |      |      |
| HETATM | 7591 | O2 | PRP | 500 | 37.073 | 18.442 | 26.870 | 1.00 | 0.00 |
| O      |      |    |     |     |        |        |        |      |      |
| HETATM | 7592 | H5 | PRP | 500 | 36.848 | 19.336 | 26.601 | 1.00 | 0.00 |
| H      |      |    |     |     |        |        |        |      |      |
| HETATM | 7593 | C3 | PRP | 500 | 35.549 | 17.469 | 25.137 | 1.00 | 0.00 |
| C      |      |    |     |     |        |        |        |      |      |
| HETATM | 7594 | H6 | PRP | 500 | 34.848 | 18.296 | 25.248 | 1.00 | 0.00 |
| H      |      |    |     |     |        |        |        |      |      |
| HETATM | 7595 | H7 | PRP | 500 | 35.622 | 17.113 | 24.110 | 1.00 | 0.00 |
| H      |      |    |     |     |        |        |        |      |      |
| HETATM | 7596 | H8 | PRP | 500 | 35.271 | 16.621 | 25.763 | 1.00 | 0.00 |
| H      |      |    |     |     |        |        |        |      |      |
| HETATM | 7597 | O1 | PRP | 501 | 21.833 | -5.472 | 39.475 | 1.00 | 0.00 |
| O      |      |    |     |     |        |        |        |      |      |
| HETATM | 7598 | H1 | PRP | 501 | 21.976 | -5.134 | 38.589 | 1.00 | 0.00 |
| H      |      |    |     |     |        |        |        |      |      |
| HETATM | 7599 | C1 | PRP | 501 | 21.353 | -4.350 | 40.221 | 1.00 | 0.00 |
| C      |      |    |     |     |        |        |        |      |      |
| HETATM | 7600 | H2 | PRP | 501 | 20.308 | -4.068 | 40.096 | 1.00 | 0.00 |
| H      |      |    |     |     |        |        |        |      |      |
| HETATM | 7601 | H3 | PRP | 501 | 21.431 | -4.623 | 41.273 | 1.00 | 0.00 |
| H      |      |    |     |     |        |        |        |      |      |
| HETATM | 7602 | C2 | PRP | 501 | 22.228 | -3.149 | 39.925 | 1.00 | 0.00 |
| C      |      |    |     |     |        |        |        |      |      |
| HETATM | 7603 | H4 | PRP | 501 | 22.039 | -2.281 | 40.556 | 1.00 | 0.00 |
| H      |      |    |     |     |        |        |        |      |      |
| HETATM | 7604 | O2 | PRP | 501 | 21.824 | -2.777 | 38.680 | 1.00 | 0.00 |
| O      |      |    |     |     |        |        |        |      |      |
| HETATM | 7605 | H5 | PRP | 501 | 22.136 | -1.880 | 38.542 | 1.00 | 0.00 |
| H      |      |    |     |     |        |        |        |      |      |
| HETATM | 7606 | C3 | PRP | 501 | 23.698 | -3.399 | 39.940 | 1.00 | 0.00 |
| C      |      |    |     |     |        |        |        |      |      |
| HETATM | 7607 | H6 | PRP | 501 | 24.025 | -3.569 | 40.966 | 1.00 | 0.00 |
| H      |      |    |     |     |        |        |        |      |      |
| HETATM | 7608 | H7 | PRP | 501 | 23.967 | -4.236 | 39.296 | 1.00 | 0.00 |
| H      |      |    |     |     |        |        |        |      |      |
| HETATM | 7609 | H8 | PRP | 501 | 24.137 | -2.485 | 39.540 | 1.00 | 0.00 |
| H      |      |    |     |     |        |        |        |      |      |
| HETATM | 7610 | O1 | PRP | 502 | 33.817 | 17.635 | 14.116 | 1.00 | 0.00 |
| O      |      |    |     |     |        |        |        |      |      |
| HETATM | 7611 | H1 | PRP | 502 | 34.528 | 17.224 | 13.619 | 1.00 | 0.00 |
| H      |      |    |     |     |        |        |        |      |      |
| HETATM | 7612 | C1 | PRP | 502 | 34.294 | 18.783 | 14.821 | 1.00 | 0.00 |
| C      |      |    |     |     |        |        |        |      |      |
| HETATM | 7613 | H2 | PRP | 502 | 33.366 | 19.206 | 15.205 | 1.00 | 0.00 |
| H      |      |    |     |     |        |        |        |      |      |
| HETATM | 7614 | H3 | PRP | 502 | 34.883 | 18.461 | 15.681 | 1.00 | 0.00 |
| H      |      |    |     |     |        |        |        |      |      |
| HETATM | 7615 | C2 | PRP | 502 | 35.066 | 19.838 | 13.945 | 1.00 | 0.00 |
| C      |      |    |     |     |        |        |        |      |      |

|        |      |    |     |     |        |        |        |      |      |
|--------|------|----|-----|-----|--------|--------|--------|------|------|
| HETATM | 7616 | H4 | PRP | 502 | 34.450 | 19.956 | 13.053 | 1.00 | 0.00 |
| H      |      |    |     |     |        |        |        |      |      |
| HETATM | 7617 | O2 | PRP | 502 | 36.283 | 19.282 | 13.434 | 1.00 | 0.00 |
| O      |      |    |     |     |        |        |        |      |      |
| HETATM | 7618 | H5 | PRP | 502 | 36.785 | 20.018 | 13.076 | 1.00 | 0.00 |
| H      |      |    |     |     |        |        |        |      |      |
| HETATM | 7619 | C3 | PRP | 502 | 35.486 | 21.092 | 14.699 | 1.00 | 0.00 |
| C      |      |    |     |     |        |        |        |      |      |
| HETATM | 7620 | H6 | PRP | 502 | 36.007 | 21.713 | 13.969 | 1.00 | 0.00 |
| H      |      |    |     |     |        |        |        |      |      |
| HETATM | 7621 | H7 | PRP | 502 | 34.522 | 21.533 | 14.951 | 1.00 | 0.00 |
| H      |      |    |     |     |        |        |        |      |      |
| HETATM | 7622 | H8 | PRP | 502 | 36.087 | 20.941 | 15.596 | 1.00 | 0.00 |
| H      |      |    |     |     |        |        |        |      |      |
| HETATM | 7623 | O1 | PRP | 503 | 35.015 | 19.105 | 21.860 | 1.00 | 0.00 |
| O      |      |    |     |     |        |        |        |      |      |
| HETATM | 7624 | H1 | PRP | 503 | 35.466 | 19.032 | 22.705 | 1.00 | 0.00 |
| H      |      |    |     |     |        |        |        |      |      |
| HETATM | 7625 | C1 | PRP | 503 | 34.136 | 17.967 | 21.895 | 1.00 | 0.00 |
| C      |      |    |     |     |        |        |        |      |      |
| HETATM | 7626 | H2 | PRP | 503 | 34.777 | 17.106 | 22.083 | 1.00 | 0.00 |
| H      |      |    |     |     |        |        |        |      |      |
| HETATM | 7627 | H3 | PRP | 503 | 33.309 | 17.947 | 22.605 | 1.00 | 0.00 |
| H      |      |    |     |     |        |        |        |      |      |
| HETATM | 7628 | C2 | PRP | 503 | 33.620 | 17.818 | 20.518 | 1.00 | 0.00 |
| C      |      |    |     |     |        |        |        |      |      |
| HETATM | 7629 | H4 | PRP | 503 | 32.989 | 16.930 | 20.533 | 1.00 | 0.00 |
| H      |      |    |     |     |        |        |        |      |      |
| HETATM | 7630 | O2 | PRP | 503 | 34.733 | 17.578 | 19.648 | 1.00 | 0.00 |
| O      |      |    |     |     |        |        |        |      |      |
| HETATM | 7631 | H5 | PRP | 503 | 35.456 | 17.911 | 20.185 | 1.00 | 0.00 |
| H      |      |    |     |     |        |        |        |      |      |
| HETATM | 7632 | C3 | PRP | 503 | 32.708 | 18.888 | 19.928 | 1.00 | 0.00 |
| C      |      |    |     |     |        |        |        |      |      |
| HETATM | 7633 | H6 | PRP | 503 | 32.997 | 19.889 | 20.247 | 1.00 | 0.00 |
| H      |      |    |     |     |        |        |        |      |      |
| HETATM | 7634 | H7 | PRP | 503 | 32.664 | 18.960 | 18.841 | 1.00 | 0.00 |
| H      |      |    |     |     |        |        |        |      |      |
| HETATM | 7635 | H8 | PRP | 503 | 31.693 | 18.652 | 20.246 | 1.00 | 0.00 |
| H      |      |    |     |     |        |        |        |      |      |
| HETATM | 7636 | O1 | PRP | 504 | 10.767 | 22.621 | 34.118 | 1.00 | 0.00 |
| O      |      |    |     |     |        |        |        |      |      |
| HETATM | 7637 | H1 | PRP | 504 | 11.437 | 22.479 | 34.791 | 1.00 | 0.00 |
| H      |      |    |     |     |        |        |        |      |      |
| HETATM | 7638 | C1 | PRP | 504 | 11.232 | 22.826 | 32.807 | 1.00 | 0.00 |
| C      |      |    |     |     |        |        |        |      |      |
| HETATM | 7639 | H2 | PRP | 504 | 12.268 | 23.163 | 32.838 | 1.00 | 0.00 |
| H      |      |    |     |     |        |        |        |      |      |
| HETATM | 7640 | H3 | PRP | 504 | 11.229 | 21.909 | 32.218 | 1.00 | 0.00 |
| H      |      |    |     |     |        |        |        |      |      |
| HETATM | 7641 | C2 | PRP | 504 | 10.355 | 23.904 | 32.092 | 1.00 | 0.00 |
| C      |      |    |     |     |        |        |        |      |      |
| HETATM | 7642 | H4 | PRP | 504 | 10.840 | 24.263 | 31.184 | 1.00 | 0.00 |
| H      |      |    |     |     |        |        |        |      |      |
| HETATM | 7643 | O2 | PRP | 504 | 10.518 | 25.111 | 32.928 | 1.00 | 0.00 |
| O      |      |    |     |     |        |        |        |      |      |

|        |      |    |     |     |        |        |        |      |      |
|--------|------|----|-----|-----|--------|--------|--------|------|------|
| HETATM | 7644 | H5 | PRP | 504 | 10.486 | 25.851 | 32.317 | 1.00 | 0.00 |
| H      |      |    |     |     |        |        |        |      |      |
| HETATM | 7645 | C3 | PRP | 504 | 8.863  | 23.445 | 31.864 | 1.00 | 0.00 |
| C      |      |    |     |     |        |        |        |      |      |
| HETATM | 7646 | H6 | PRP | 504 | 8.806  | 22.557 | 31.233 | 1.00 | 0.00 |
| H      |      |    |     |     |        |        |        |      |      |
| HETATM | 7647 | H7 | PRP | 504 | 8.400  | 23.184 | 32.815 | 1.00 | 0.00 |
| H      |      |    |     |     |        |        |        |      |      |
| HETATM | 7648 | H8 | PRP | 504 | 8.371  | 24.269 | 31.348 | 1.00 | 0.00 |
| H      |      |    |     |     |        |        |        |      |      |
| HETATM | 7649 | O1 | PRP | 505 | 6.692  | 30.827 | 37.402 | 1.00 | 0.00 |
| O      |      |    |     |     |        |        |        |      |      |
| HETATM | 7650 | H1 | PRP | 505 | 6.443  | 30.639 | 36.494 | 1.00 | 0.00 |
| H      |      |    |     |     |        |        |        |      |      |
| HETATM | 7651 | C1 | PRP | 505 | 8.087  | 31.157 | 37.406 | 1.00 | 0.00 |
| C      |      |    |     |     |        |        |        |      |      |
| HETATM | 7652 | H2 | PRP | 505 | 8.626  | 30.601 | 36.640 | 1.00 | 0.00 |
| H      |      |    |     |     |        |        |        |      |      |
| HETATM | 7653 | H3 | PRP | 505 | 8.117  | 32.219 | 37.161 | 1.00 | 0.00 |
| H      |      |    |     |     |        |        |        |      |      |
| HETATM | 7654 | C2 | PRP | 505 | 8.837  | 30.928 | 38.738 | 1.00 | 0.00 |
| C      |      |    |     |     |        |        |        |      |      |
| HETATM | 7655 | H4 | PRP | 505 | 8.691  | 29.884 | 39.016 | 1.00 | 0.00 |
| H      |      |    |     |     |        |        |        |      |      |
| HETATM | 7656 | O2 | PRP | 505 | 8.358  | 31.824 | 39.752 | 1.00 | 0.00 |
| O      |      |    |     |     |        |        |        |      |      |
| HETATM | 7657 | H5 | PRP | 505 | 7.435  | 31.617 | 39.917 | 1.00 | 0.00 |
| H      |      |    |     |     |        |        |        |      |      |
| HETATM | 7658 | C3 | PRP | 505 | 10.313 | 31.180 | 38.572 | 1.00 | 0.00 |
| C      |      |    |     |     |        |        |        |      |      |
| HETATM | 7659 | H6 | PRP | 505 | 10.468 | 32.258 | 38.627 | 1.00 | 0.00 |
| H      |      |    |     |     |        |        |        |      |      |
| HETATM | 7660 | H7 | PRP | 505 | 10.749 | 30.624 | 39.402 | 1.00 | 0.00 |
| H      |      |    |     |     |        |        |        |      |      |
| HETATM | 7661 | H8 | PRP | 505 | 10.638 | 30.788 | 37.608 | 1.00 | 0.00 |
| H      |      |    |     |     |        |        |        |      |      |
| HETATM | 7662 | O1 | PRP | 506 | 5.834  | 38.418 | 45.526 | 1.00 | 0.00 |
| O      |      |    |     |     |        |        |        |      |      |
| HETATM | 7663 | H1 | PRP | 506 | 6.168  | 38.179 | 46.394 | 1.00 | 0.00 |
| H      |      |    |     |     |        |        |        |      |      |
| HETATM | 7664 | C1 | PRP | 506 | 4.543  | 38.951 | 45.829 | 1.00 | 0.00 |
| C      |      |    |     |     |        |        |        |      |      |
| HETATM | 7665 | H2 | PRP | 506 | 4.631  | 39.794 | 46.516 | 1.00 | 0.00 |
| H      |      |    |     |     |        |        |        |      |      |
| HETATM | 7666 | H3 | PRP | 506 | 4.112  | 39.233 | 44.869 | 1.00 | 0.00 |
| H      |      |    |     |     |        |        |        |      |      |
| HETATM | 7667 | C2 | PRP | 506 | 3.637  | 37.937 | 46.592 | 1.00 | 0.00 |
| C      |      |    |     |     |        |        |        |      |      |
| HETATM | 7668 | H4 | PRP | 506 | 2.636  | 38.356 | 46.700 | 1.00 | 0.00 |
| H      |      |    |     |     |        |        |        |      |      |
| HETATM | 7669 | O2 | PRP | 506 | 4.054  | 37.619 | 47.901 | 1.00 | 0.00 |
| O      |      |    |     |     |        |        |        |      |      |
| HETATM | 7670 | H5 | PRP | 506 | 3.507  | 36.894 | 48.212 | 1.00 | 0.00 |
| H      |      |    |     |     |        |        |        |      |      |
| HETATM | 7671 | C3 | PRP | 506 | 3.428  | 36.682 | 45.692 | 1.00 | 0.00 |
| C      |      |    |     |     |        |        |        |      |      |

|        |      |    |     |     |        |        |        |      |      |
|--------|------|----|-----|-----|--------|--------|--------|------|------|
| HETATM | 7672 | H6 | PRP | 506 | 4.403  | 36.220 | 45.536 | 1.00 | 0.00 |
| H      |      |    |     |     |        |        |        |      |      |
| HETATM | 7673 | H7 | PRP | 506 | 2.639  | 36.037 | 46.081 | 1.00 | 0.00 |
| H      |      |    |     |     |        |        |        |      |      |
| HETATM | 7674 | H8 | PRP | 506 | 3.222  | 36.943 | 44.654 | 1.00 | 0.00 |
| H      |      |    |     |     |        |        |        |      |      |
| HETATM | 7675 | O1 | PRP | 507 | 15.176 | 33.670 | 29.897 | 1.00 | 0.00 |
| O      |      |    |     |     |        |        |        |      |      |
| HETATM | 7676 | H1 | PRP | 507 | 14.590 | 34.343 | 30.251 | 1.00 | 0.00 |
| H      |      |    |     |     |        |        |        |      |      |
| HETATM | 7677 | C1 | PRP | 507 | 16.188 | 34.531 | 29.455 | 1.00 | 0.00 |
| C      |      |    |     |     |        |        |        |      |      |
| HETATM | 7678 | H2 | PRP | 507 | 16.770 | 34.040 | 28.676 | 1.00 | 0.00 |
| H      |      |    |     |     |        |        |        |      |      |
| HETATM | 7679 | H3 | PRP | 507 | 15.848 | 35.472 | 29.021 | 1.00 | 0.00 |
| H      |      |    |     |     |        |        |        |      |      |
| HETATM | 7680 | C2 | PRP | 507 | 17.107 | 34.664 | 30.607 | 1.00 | 0.00 |
| C      |      |    |     |     |        |        |        |      |      |
| HETATM | 7681 | H4 | PRP | 507 | 17.282 | 33.669 | 31.017 | 1.00 | 0.00 |
| H      |      |    |     |     |        |        |        |      |      |
| HETATM | 7682 | O2 | PRP | 507 | 16.508 | 35.460 | 31.552 | 1.00 | 0.00 |
| O      |      |    |     |     |        |        |        |      |      |
| HETATM | 7683 | H5 | PRP | 507 | 16.091 | 34.871 | 32.186 | 1.00 | 0.00 |
| H      |      |    |     |     |        |        |        |      |      |
| HETATM | 7684 | C3 | PRP | 507 | 18.398 | 35.255 | 29.991 | 1.00 | 0.00 |
| C      |      |    |     |     |        |        |        |      |      |
| HETATM | 7685 | H6 | PRP | 507 | 18.068 | 36.157 | 29.475 | 1.00 | 0.00 |
| H      |      |    |     |     |        |        |        |      |      |
| HETATM | 7686 | H7 | PRP | 507 | 19.105 | 35.414 | 30.805 | 1.00 | 0.00 |
| H      |      |    |     |     |        |        |        |      |      |
| HETATM | 7687 | H8 | PRP | 507 | 18.769 | 34.613 | 29.192 | 1.00 | 0.00 |
| H      |      |    |     |     |        |        |        |      |      |
| HETATM | 7688 | O1 | PRP | 508 | 29.859 | 37.141 | 20.134 | 1.00 | 0.00 |
| O      |      |    |     |     |        |        |        |      |      |
| HETATM | 7689 | H1 | PRP | 508 | 29.766 | 37.301 | 21.076 | 1.00 | 0.00 |
| H      |      |    |     |     |        |        |        |      |      |
| HETATM | 7690 | C1 | PRP | 508 | 31.244 | 37.048 | 19.813 | 1.00 | 0.00 |
| C      |      |    |     |     |        |        |        |      |      |
| HETATM | 7691 | H2 | PRP | 508 | 31.352 | 36.868 | 18.744 | 1.00 | 0.00 |
| H      |      |    |     |     |        |        |        |      |      |
| HETATM | 7692 | H3 | PRP | 508 | 31.522 | 38.073 | 20.055 | 1.00 | 0.00 |
| H      |      |    |     |     |        |        |        |      |      |
| HETATM | 7693 | C2 | PRP | 508 | 32.050 | 36.003 | 20.649 | 1.00 | 0.00 |
| C      |      |    |     |     |        |        |        |      |      |
| HETATM | 7694 | H4 | PRP | 508 | 31.588 | 35.016 | 20.659 | 1.00 | 0.00 |
| H      |      |    |     |     |        |        |        |      |      |
| HETATM | 7695 | O2 | PRP | 508 | 32.240 | 36.429 | 21.985 | 1.00 | 0.00 |
| O      |      |    |     |     |        |        |        |      |      |
| HETATM | 7696 | H5 | PRP | 508 | 32.637 | 37.302 | 22.030 | 1.00 | 0.00 |
| H      |      |    |     |     |        |        |        |      |      |
| HETATM | 7697 | C3 | PRP | 508 | 33.491 | 35.958 | 20.212 | 1.00 | 0.00 |
| C      |      |    |     |     |        |        |        |      |      |
| HETATM | 7698 | H6 | PRP | 508 | 34.146 | 35.425 | 20.902 | 1.00 | 0.00 |
| H      |      |    |     |     |        |        |        |      |      |
| HETATM | 7699 | H7 | PRP | 508 | 33.619 | 35.425 | 19.270 | 1.00 | 0.00 |
| H      |      |    |     |     |        |        |        |      |      |

|        |      |    |     |     |        |        |        |      |      |
|--------|------|----|-----|-----|--------|--------|--------|------|------|
| HETATM | 7700 | H8 | PRP | 508 | 33.891 | 36.967 | 20.121 | 1.00 | 0.00 |
| H      |      |    |     |     |        |        |        |      |      |
| HETATM | 7701 | O1 | PRP | 509 | 15.301 | 33.401 | 33.442 | 1.00 | 0.00 |
| O      |      |    |     |     |        |        |        |      |      |
| HETATM | 7702 | H1 | PRP | 509 | 14.995 | 33.371 | 34.351 | 1.00 | 0.00 |
| H      |      |    |     |     |        |        |        |      |      |
| HETATM | 7703 | C1 | PRP | 509 | 15.301 | 32.101 | 32.880 | 1.00 | 0.00 |
| C      |      |    |     |     |        |        |        |      |      |
| HETATM | 7704 | H2 | PRP | 509 | 15.853 | 32.028 | 31.943 | 1.00 | 0.00 |
| H      |      |    |     |     |        |        |        |      |      |
| HETATM | 7705 | H3 | PRP | 509 | 15.706 | 31.457 | 33.661 | 1.00 | 0.00 |
| H      |      |    |     |     |        |        |        |      |      |
| HETATM | 7706 | C2 | PRP | 509 | 13.896 | 31.769 | 32.533 | 1.00 | 0.00 |
| C      |      |    |     |     |        |        |        |      |      |
| HETATM | 7707 | H4 | PRP | 509 | 13.522 | 32.486 | 31.802 | 1.00 | 0.00 |
| H      |      |    |     |     |        |        |        |      |      |
| HETATM | 7708 | O2 | PRP | 509 | 13.016 | 31.778 | 33.689 | 1.00 | 0.00 |
| O      |      |    |     |     |        |        |        |      |      |
| HETATM | 7709 | H5 | PRP | 509 | 12.615 | 30.914 | 33.810 | 1.00 | 0.00 |
| H      |      |    |     |     |        |        |        |      |      |
| HETATM | 7710 | C3 | PRP | 509 | 13.845 | 30.367 | 31.873 | 1.00 | 0.00 |
| C      |      |    |     |     |        |        |        |      |      |
| HETATM | 7711 | H6 | PRP | 509 | 14.317 | 30.459 | 30.895 | 1.00 | 0.00 |
| H      |      |    |     |     |        |        |        |      |      |
| HETATM | 7712 | H7 | PRP | 509 | 14.410 | 29.739 | 32.562 | 1.00 | 0.00 |
| H      |      |    |     |     |        |        |        |      |      |
| HETATM | 7713 | H8 | PRP | 509 | 12.884 | 29.896 | 31.668 | 1.00 | 0.00 |
| H      |      |    |     |     |        |        |        |      |      |
| HETATM | 7714 | O1 | PRP | 510 | 2.221  | 15.682 | 43.960 | 1.00 | 0.00 |
| O      |      |    |     |     |        |        |        |      |      |
| HETATM | 7715 | H1 | PRP | 510 | 1.823  | 16.343 | 44.531 | 1.00 | 0.00 |
| H      |      |    |     |     |        |        |        |      |      |
| HETATM | 7716 | C1 | PRP | 510 | 3.579  | 15.800 | 44.124 | 1.00 | 0.00 |
| C      |      |    |     |     |        |        |        |      |      |
| HETATM | 7717 | H2 | PRP | 510 | 4.012  | 15.017 | 43.501 | 1.00 | 0.00 |
| H      |      |    |     |     |        |        |        |      |      |
| HETATM | 7718 | H3 | PRP | 510 | 3.985  | 16.744 | 43.762 | 1.00 | 0.00 |
| H      |      |    |     |     |        |        |        |      |      |
| HETATM | 7719 | C2 | PRP | 510 | 3.852  | 15.699 | 45.589 | 1.00 | 0.00 |
| C      |      |    |     |     |        |        |        |      |      |
| HETATM | 7720 | H4 | PRP | 510 | 3.587  | 14.682 | 45.877 | 1.00 | 0.00 |
| H      |      |    |     |     |        |        |        |      |      |
| HETATM | 7721 | O2 | PRP | 510 | 3.066  | 16.632 | 46.290 | 1.00 | 0.00 |
| O      |      |    |     |     |        |        |        |      |      |
| HETATM | 7722 | H5 | PRP | 510 | 3.346  | 16.533 | 47.203 | 1.00 | 0.00 |
| H      |      |    |     |     |        |        |        |      |      |
| HETATM | 7723 | C3 | PRP | 510 | 5.322  | 15.882 | 45.876 | 1.00 | 0.00 |
| C      |      |    |     |     |        |        |        |      |      |
| HETATM | 7724 | H6 | PRP | 510 | 5.628  | 15.560 | 46.871 | 1.00 | 0.00 |
| H      |      |    |     |     |        |        |        |      |      |
| HETATM | 7725 | H7 | PRP | 510 | 6.009  | 15.253 | 45.309 | 1.00 | 0.00 |
| H      |      |    |     |     |        |        |        |      |      |
| HETATM | 7726 | H8 | PRP | 510 | 5.487  | 16.951 | 45.743 | 1.00 | 0.00 |
| H      |      |    |     |     |        |        |        |      |      |
| HETATM | 7727 | O1 | PRP | 511 | 37.311 | 41.611 | 34.492 | 1.00 | 0.00 |
| O      |      |    |     |     |        |        |        |      |      |

|        |      |    |     |     |        |        |        |      |      |
|--------|------|----|-----|-----|--------|--------|--------|------|------|
| HETATM | 7728 | H1 | PRP | 511 | 38.262 | 41.652 | 34.371 | 1.00 | 0.00 |
| H      |      |    |     |     |        |        |        |      |      |
| HETATM | 7729 | C1 | PRP | 511 | 37.076 | 40.596 | 35.443 | 1.00 | 0.00 |
| C      |      |    |     |     |        |        |        |      |      |
| HETATM | 7730 | H2 | PRP | 511 | 38.005 | 40.029 | 35.392 | 1.00 | 0.00 |
| H      |      |    |     |     |        |        |        |      |      |
| HETATM | 7731 | H3 | PRP | 511 | 37.066 | 40.993 | 36.458 | 1.00 | 0.00 |
| H      |      |    |     |     |        |        |        |      |      |
| HETATM | 7732 | C2 | PRP | 511 | 35.816 | 39.773 | 35.032 | 1.00 | 0.00 |
| C      |      |    |     |     |        |        |        |      |      |
| HETATM | 7733 | H4 | PRP | 511 | 35.930 | 39.480 | 33.988 | 1.00 | 0.00 |
| H      |      |    |     |     |        |        |        |      |      |
| HETATM | 7734 | O2 | PRP | 511 | 34.528 | 40.342 | 35.105 | 1.00 | 0.00 |
| O      |      |    |     |     |        |        |        |      |      |
| HETATM | 7735 | H5 | PRP | 511 | 34.003 | 39.950 | 34.404 | 1.00 | 0.00 |
| H      |      |    |     |     |        |        |        |      |      |
| HETATM | 7736 | C3 | PRP | 511 | 35.832 | 38.459 | 35.794 | 1.00 | 0.00 |
| C      |      |    |     |     |        |        |        |      |      |
| HETATM | 7737 | H6 | PRP | 511 | 35.139 | 37.744 | 35.351 | 1.00 | 0.00 |
| H      |      |    |     |     |        |        |        |      |      |
| HETATM | 7738 | H7 | PRP | 511 | 36.842 | 38.059 | 35.883 | 1.00 | 0.00 |
| H      |      |    |     |     |        |        |        |      |      |
| HETATM | 7739 | H8 | PRP | 511 | 35.441 | 38.620 | 36.798 | 1.00 | 0.00 |
| H      |      |    |     |     |        |        |        |      |      |
| HETATM | 7740 | O1 | PRP | 512 | 29.146 | 40.114 | 35.247 | 1.00 | 0.00 |
| O      |      |    |     |     |        |        |        |      |      |
| HETATM | 7741 | H1 | PRP | 512 | 29.118 | 39.155 | 35.295 | 1.00 | 0.00 |
| H      |      |    |     |     |        |        |        |      |      |
| HETATM | 7742 | C1 | PRP | 512 | 29.973 | 40.525 | 34.208 | 1.00 | 0.00 |
| C      |      |    |     |     |        |        |        |      |      |
| HETATM | 7743 | H2 | PRP | 512 | 29.638 | 41.538 | 33.984 | 1.00 | 0.00 |
| H      |      |    |     |     |        |        |        |      |      |
| HETATM | 7744 | H3 | PRP | 512 | 31.022 | 40.340 | 34.443 | 1.00 | 0.00 |
| H      |      |    |     |     |        |        |        |      |      |
| HETATM | 7745 | C2 | PRP | 512 | 29.587 | 39.812 | 32.916 | 1.00 | 0.00 |
| C      |      |    |     |     |        |        |        |      |      |
| HETATM | 7746 | H4 | PRP | 512 | 28.520 | 39.600 | 32.853 | 1.00 | 0.00 |
| H      |      |    |     |     |        |        |        |      |      |
| HETATM | 7747 | O2 | PRP | 512 | 30.296 | 38.670 | 32.653 | 1.00 | 0.00 |
| O      |      |    |     |     |        |        |        |      |      |
| HETATM | 7748 | H5 | PRP | 512 | 29.757 | 38.122 | 32.079 | 1.00 | 0.00 |
| H      |      |    |     |     |        |        |        |      |      |
| HETATM | 7749 | C3 | PRP | 512 | 29.775 | 40.722 | 31.735 | 1.00 | 0.00 |
| C      |      |    |     |     |        |        |        |      |      |
| HETATM | 7750 | H6 | PRP | 512 | 29.190 | 41.641 | 31.772 | 1.00 | 0.00 |
| H      |      |    |     |     |        |        |        |      |      |
| HETATM | 7751 | H7 | PRP | 512 | 30.773 | 41.162 | 31.729 | 1.00 | 0.00 |
| H      |      |    |     |     |        |        |        |      |      |
| HETATM | 7752 | H8 | PRP | 512 | 29.480 | 40.225 | 30.811 | 1.00 | 0.00 |
| H      |      |    |     |     |        |        |        |      |      |
| HETATM | 7753 | O1 | PRP | 513 | 11.428 | 11.868 | 23.928 | 1.00 | 0.00 |
| O      |      |    |     |     |        |        |        |      |      |
| HETATM | 7754 | H1 | PRP | 513 | 10.844 | 11.123 | 24.086 | 1.00 | 0.00 |
| H      |      |    |     |     |        |        |        |      |      |
| HETATM | 7755 | C1 | PRP | 513 | 11.134 | 12.587 | 22.743 | 1.00 | 0.00 |
| C      |      |    |     |     |        |        |        |      |      |



|        |      |    |     |     |        |        |        |      |      |
|--------|------|----|-----|-----|--------|--------|--------|------|------|
| HETATM | 7756 | H2 | PRP | 513 | 11.696 | 13.521 | 22.754 | 1.00 | 0.00 |
| H      |      |    |     |     |        |        |        |      |      |
| HETATM | 7757 | H3 | PRP | 513 | 11.424 | 11.972 | 21.891 | 1.00 | 0.00 |
| H      |      |    |     |     |        |        |        |      |      |
| HETATM | 7758 | C2 | PRP | 513 | 9.644  | 12.906 | 22.724 | 1.00 | 0.00 |
| C      |      |    |     |     |        |        |        |      |      |
| HETATM | 7759 | H4 | PRP | 513 | 9.318  | 13.604 | 23.495 | 1.00 | 0.00 |
| H      |      |    |     |     |        |        |        |      |      |
| HETATM | 7760 | O2 | PRP | 513 | 8.806  | 11.693 | 22.763 | 1.00 | 0.00 |
| O      |      |    |     |     |        |        |        |      |      |
| HETATM | 7761 | H5 | PRP | 513 | 7.934  | 11.872 | 22.403 | 1.00 | 0.00 |
| H      |      |    |     |     |        |        |        |      |      |
| HETATM | 7762 | C3 | PRP | 513 | 9.247  | 13.624 | 21.425 | 1.00 | 0.00 |
| C      |      |    |     |     |        |        |        |      |      |
| HETATM | 7763 | H6 | PRP | 513 | 8.165  | 13.739 | 21.488 | 1.00 | 0.00 |
| H      |      |    |     |     |        |        |        |      |      |
| HETATM | 7764 | H7 | PRP | 513 | 9.634  | 14.642 | 21.468 | 1.00 | 0.00 |
| H      |      |    |     |     |        |        |        |      |      |
| HETATM | 7765 | H8 | PRP | 513 | 9.502  | 13.045 | 20.537 | 1.00 | 0.00 |
| H      |      |    |     |     |        |        |        |      |      |
| HETATM | 7766 | O1 | PRP | 514 | 22.086 | 36.641 | 30.352 | 1.00 | 0.00 |
| O      |      |    |     |     |        |        |        |      |      |
| HETATM | 7767 | H1 | PRP | 514 | 21.348 | 37.254 | 30.398 | 1.00 | 0.00 |
| H      |      |    |     |     |        |        |        |      |      |
| HETATM | 7768 | C1 | PRP | 514 | 21.999 | 35.864 | 31.586 | 1.00 | 0.00 |
| C      |      |    |     |     |        |        |        |      |      |
| HETATM | 7769 | H2 | PRP | 514 | 21.899 | 36.454 | 32.497 | 1.00 | 0.00 |
| H      |      |    |     |     |        |        |        |      |      |
| HETATM | 7770 | H3 | PRP | 514 | 21.091 | 35.267 | 31.503 | 1.00 | 0.00 |
| H      |      |    |     |     |        |        |        |      |      |
| HETATM | 7771 | C2 | PRP | 514 | 23.253 | 34.967 | 31.810 | 1.00 | 0.00 |
| C      |      |    |     |     |        |        |        |      |      |
| HETATM | 7772 | H4 | PRP | 514 | 23.174 | 34.359 | 32.711 | 1.00 | 0.00 |
| H      |      |    |     |     |        |        |        |      |      |
| HETATM | 7773 | O2 | PRP | 514 | 24.417 | 35.785 | 31.826 | 1.00 | 0.00 |
| O      |      |    |     |     |        |        |        |      |      |
| HETATM | 7774 | H5 | PRP | 514 | 24.277 | 36.333 | 31.050 | 1.00 | 0.00 |
| H      |      |    |     |     |        |        |        |      |      |
| HETATM | 7775 | C3 | PRP | 514 | 23.528 | 33.925 | 30.763 | 1.00 | 0.00 |
| C      |      |    |     |     |        |        |        |      |      |
| HETATM | 7776 | H6 | PRP | 514 | 22.630 | 33.315 | 30.666 | 1.00 | 0.00 |
| H      |      |    |     |     |        |        |        |      |      |
| HETATM | 7777 | H7 | PRP | 514 | 23.889 | 34.307 | 29.808 | 1.00 | 0.00 |
| H      |      |    |     |     |        |        |        |      |      |
| HETATM | 7778 | H8 | PRP | 514 | 24.304 | 33.234 | 31.092 | 1.00 | 0.00 |
| H      |      |    |     |     |        |        |        |      |      |
| HETATM | 7779 | O1 | PRP | 515 | 11.653 | 7.175  | 26.603 | 1.00 | 0.00 |
| O      |      |    |     |     |        |        |        |      |      |
| HETATM | 7780 | H1 | PRP | 515 | 11.412 | 6.557  | 27.298 | 1.00 | 0.00 |
| H      |      |    |     |     |        |        |        |      |      |
| HETATM | 7781 | C1 | PRP | 515 | 10.557 | 7.925  | 26.095 | 1.00 | 0.00 |
| C      |      |    |     |     |        |        |        |      |      |
| HETATM | 7782 | H2 | PRP | 515 | 10.922 | 8.396  | 25.182 | 1.00 | 0.00 |
| H      |      |    |     |     |        |        |        |      |      |
| HETATM | 7783 | H3 | PRP | 515 | 9.732  | 7.250  | 25.864 | 1.00 | 0.00 |
| H      |      |    |     |     |        |        |        |      |      |

|        |      |    |     |     |        |        |        |      |      |
|--------|------|----|-----|-----|--------|--------|--------|------|------|
| HETATM | 7784 | C2 | PRP | 515 | 10.009 | 8.964  | 27.048 | 1.00 | 0.00 |
| C      |      |    |     |     |        |        |        |      |      |
| HETATM | 7785 | H4 | PRP | 515 | 10.791 | 9.655  | 27.363 | 1.00 | 0.00 |
| H      |      |    |     |     |        |        |        |      |      |
| HETATM | 7786 | O2 | PRP | 515 | 9.282  | 8.341  | 28.066 | 1.00 | 0.00 |
| O      |      |    |     |     |        |        |        |      |      |
| HETATM | 7787 | H5 | PRP | 515 | 9.727  | 7.590  | 28.466 | 1.00 | 0.00 |
| H      |      |    |     |     |        |        |        |      |      |
| HETATM | 7788 | C3 | PRP | 515 | 9.020  | 9.966  | 26.445 | 1.00 | 0.00 |
| C      |      |    |     |     |        |        |        |      |      |
| HETATM | 7789 | H6 | PRP | 515 | 8.556  | 10.632 | 27.172 | 1.00 | 0.00 |
| H      |      |    |     |     |        |        |        |      |      |
| HETATM | 7790 | H7 | PRP | 515 | 9.569  | 10.489 | 25.662 | 1.00 | 0.00 |
| H      |      |    |     |     |        |        |        |      |      |
| HETATM | 7791 | H8 | PRP | 515 | 8.173  | 9.480  | 25.959 | 1.00 | 0.00 |
| H      |      |    |     |     |        |        |        |      |      |
| HETATM | 7792 | O1 | PRP | 516 | 32.071 | 42.650 | 17.410 | 1.00 | 0.00 |
| O      |      |    |     |     |        |        |        |      |      |
| HETATM | 7793 | H1 | PRP | 516 | 32.165 | 43.590 | 17.580 | 1.00 | 0.00 |
| H      |      |    |     |     |        |        |        |      |      |
| HETATM | 7794 | C1 | PRP | 516 | 30.813 | 42.377 | 16.821 | 1.00 | 0.00 |
| C      |      |    |     |     |        |        |        |      |      |
| HETATM | 7795 | H2 | PRP | 516 | 30.760 | 42.897 | 15.865 | 1.00 | 0.00 |
| H      |      |    |     |     |        |        |        |      |      |
| HETATM | 7796 | H3 | PRP | 516 | 30.754 | 41.325 | 16.541 | 1.00 | 0.00 |
| H      |      |    |     |     |        |        |        |      |      |
| HETATM | 7797 | C2 | PRP | 516 | 29.645 | 42.429 | 17.913 | 1.00 | 0.00 |
| C      |      |    |     |     |        |        |        |      |      |
| HETATM | 7798 | H4 | PRP | 516 | 28.740 | 41.985 | 17.498 | 1.00 | 0.00 |
| H      |      |    |     |     |        |        |        |      |      |
| HETATM | 7799 | O2 | PRP | 516 | 29.474 | 43.853 | 18.088 | 1.00 | 0.00 |
| O      |      |    |     |     |        |        |        |      |      |
| HETATM | 7800 | H5 | PRP | 516 | 28.693 | 44.026 | 18.617 | 1.00 | 0.00 |
| H      |      |    |     |     |        |        |        |      |      |
| HETATM | 7801 | C3 | PRP | 516 | 29.977 | 41.661 | 19.257 | 1.00 | 0.00 |
| C      |      |    |     |     |        |        |        |      |      |
| HETATM | 7802 | H6 | PRP | 516 | 30.465 | 40.743 | 18.932 | 1.00 | 0.00 |
| H      |      |    |     |     |        |        |        |      |      |
| HETATM | 7803 | H7 | PRP | 516 | 30.727 | 42.213 | 19.824 | 1.00 | 0.00 |
| H      |      |    |     |     |        |        |        |      |      |
| HETATM | 7804 | H8 | PRP | 516 | 29.121 | 41.371 | 19.867 | 1.00 | 0.00 |
| H      |      |    |     |     |        |        |        |      |      |
| HETATM | 7805 | O1 | PRP | 517 | 14.268 | 14.317 | 24.480 | 1.00 | 0.00 |
| O      |      |    |     |     |        |        |        |      |      |
| HETATM | 7806 | H1 | PRP | 517 | 15.051 | 14.348 | 23.925 | 1.00 | 0.00 |
| H      |      |    |     |     |        |        |        |      |      |
| HETATM | 7807 | C1 | PRP | 517 | 14.320 | 13.094 | 25.266 | 1.00 | 0.00 |
| C      |      |    |     |     |        |        |        |      |      |
| HETATM | 7808 | H2 | PRP | 517 | 15.012 | 13.237 | 26.097 | 1.00 | 0.00 |
| H      |      |    |     |     |        |        |        |      |      |
| HETATM | 7809 | H3 | PRP | 517 | 13.329 | 12.803 | 25.615 | 1.00 | 0.00 |
| H      |      |    |     |     |        |        |        |      |      |
| HETATM | 7810 | C2 | PRP | 517 | 14.882 | 11.952 | 24.514 | 1.00 | 0.00 |
| C      |      |    |     |     |        |        |        |      |      |
| HETATM | 7811 | H4 | PRP | 517 | 15.956 | 12.088 | 24.390 | 1.00 | 0.00 |
| H      |      |    |     |     |        |        |        |      |      |

|        |      |    |     |     |        |        |        |      |      |
|--------|------|----|-----|-----|--------|--------|--------|------|------|
| HETATM | 7812 | O2 | PRP | 517 | 14.350 | 11.807 | 23.234 | 1.00 | 0.00 |
| O      |      |    |     |     |        |        |        |      |      |
| HETATM | 7813 | H5 | PRP | 517 | 13.396 | 11.855 | 23.324 | 1.00 | 0.00 |
| H      |      |    |     |     |        |        |        |      |      |
| HETATM | 7814 | C3 | PRP | 517 | 14.797 | 10.646 | 25.318 | 1.00 | 0.00 |
| C      |      |    |     |     |        |        |        |      |      |
| HETATM | 7815 | H6 | PRP | 517 | 15.408 | 9.852  | 24.889 | 1.00 | 0.00 |
| H      |      |    |     |     |        |        |        |      |      |
| HETATM | 7816 | H7 | PRP | 517 | 15.078 | 10.909 | 26.338 | 1.00 | 0.00 |
| H      |      |    |     |     |        |        |        |      |      |
| HETATM | 7817 | H8 | PRP | 517 | 13.767 | 10.290 | 25.315 | 1.00 | 0.00 |
| H      |      |    |     |     |        |        |        |      |      |
| HETATM | 7818 | O1 | PRP | 518 | 44.280 | 30.989 | 24.592 | 1.00 | 0.00 |
| O      |      |    |     |     |        |        |        |      |      |
| HETATM | 7819 | H1 | PRP | 518 | 44.366 | 30.460 | 25.389 | 1.00 | 0.00 |
| H      |      |    |     |     |        |        |        |      |      |
| HETATM | 7820 | C1 | PRP | 518 | 43.658 | 32.171 | 25.058 | 1.00 | 0.00 |
| C      |      |    |     |     |        |        |        |      |      |
| HETATM | 7821 | H2 | PRP | 518 | 44.520 | 32.833 | 25.149 | 1.00 | 0.00 |
| H      |      |    |     |     |        |        |        |      |      |
| HETATM | 7822 | H3 | PRP | 518 | 42.940 | 32.574 | 24.345 | 1.00 | 0.00 |
| H      |      |    |     |     |        |        |        |      |      |
| HETATM | 7823 | C2 | PRP | 518 | 43.023 | 31.841 | 26.371 | 1.00 | 0.00 |
| C      |      |    |     |     |        |        |        |      |      |
| HETATM | 7824 | H4 | PRP | 518 | 42.808 | 32.788 | 26.866 | 1.00 | 0.00 |
| H      |      |    |     |     |        |        |        |      |      |
| HETATM | 7825 | O2 | PRP | 518 | 43.887 | 31.131 | 27.234 | 1.00 | 0.00 |
| O      |      |    |     |     |        |        |        |      |      |
| HETATM | 7826 | H5 | PRP | 518 | 43.347 | 30.823 | 27.965 | 1.00 | 0.00 |
| H      |      |    |     |     |        |        |        |      |      |
| HETATM | 7827 | C3 | PRP | 518 | 41.737 | 31.122 | 26.231 | 1.00 | 0.00 |
| C      |      |    |     |     |        |        |        |      |      |
| HETATM | 7828 | H6 | PRP | 518 | 41.918 | 30.504 | 25.351 | 1.00 | 0.00 |
| H      |      |    |     |     |        |        |        |      |      |
| HETATM | 7829 | H7 | PRP | 518 | 41.406 | 30.578 | 27.116 | 1.00 | 0.00 |
| H      |      |    |     |     |        |        |        |      |      |
| HETATM | 7830 | H8 | PRP | 518 | 40.955 | 31.834 | 25.967 | 1.00 | 0.00 |
| H      |      |    |     |     |        |        |        |      |      |
| HETATM | 7831 | O1 | PRP | 519 | 6.894  | -0.646 | 15.536 | 1.00 | 0.00 |
| O      |      |    |     |     |        |        |        |      |      |
| HETATM | 7832 | H1 | PRP | 519 | 7.405  | -1.450 | 15.415 | 1.00 | 0.00 |
| H      |      |    |     |     |        |        |        |      |      |
| HETATM | 7833 | C1 | PRP | 519 | 7.650  | 0.459  | 14.950 | 1.00 | 0.00 |
| C      |      |    |     |     |        |        |        |      |      |
| HETATM | 7834 | H2 | PRP | 519 | 8.571  | 0.649  | 15.501 | 1.00 | 0.00 |
| H      |      |    |     |     |        |        |        |      |      |
| HETATM | 7835 | H3 | PRP | 519 | 7.898  | 0.139  | 13.938 | 1.00 | 0.00 |
| H      |      |    |     |     |        |        |        |      |      |
| HETATM | 7836 | C2 | PRP | 519 | 6.879  | 1.737  | 14.949 | 1.00 | 0.00 |
| C      |      |    |     |     |        |        |        |      |      |
| HETATM | 7837 | H4 | PRP | 519 | 6.420  | 1.801  | 15.935 | 1.00 | 0.00 |
| H      |      |    |     |     |        |        |        |      |      |
| HETATM | 7838 | O2 | PRP | 519 | 5.923  | 1.852  | 13.853 | 1.00 | 0.00 |
| O      |      |    |     |     |        |        |        |      |      |
| HETATM | 7839 | H5 | PRP | 519 | 5.269  | 1.179  | 14.055 | 1.00 | 0.00 |
| H      |      |    |     |     |        |        |        |      |      |

|        |      |    |     |     |        |        |        |      |      |
|--------|------|----|-----|-----|--------|--------|--------|------|------|
| HETATM | 7840 | C3 | PRP | 519 | 7.793  | 2.931  | 14.828 | 1.00 | 0.00 |
| C      |      |    |     |     |        |        |        |      |      |
| HETATM | 7841 | H6 | PRP | 519 | 8.316  | 2.863  | 13.875 | 1.00 | 0.00 |
| H      |      |    |     |     |        |        |        |      |      |
| HETATM | 7842 | H7 | PRP | 519 | 7.122  | 3.789  | 14.889 | 1.00 | 0.00 |
| H      |      |    |     |     |        |        |        |      |      |
| HETATM | 7843 | H8 | PRP | 519 | 8.599  | 2.946  | 15.562 | 1.00 | 0.00 |
| H      |      |    |     |     |        |        |        |      |      |
| HETATM | 7844 | O1 | PRP | 520 | 37.439 | 17.293 | 22.171 | 1.00 | 0.00 |
| O      |      |    |     |     |        |        |        |      |      |
| HETATM | 7845 | H1 | PRP | 520 | 38.349 | 17.550 | 22.342 | 1.00 | 0.00 |
| H      |      |    |     |     |        |        |        |      |      |
| HETATM | 7846 | C1 | PRP | 520 | 37.575 | 15.952 | 21.654 | 1.00 | 0.00 |
| C      |      |    |     |     |        |        |        |      |      |
| HETATM | 7847 | H2 | PRP | 520 | 37.750 | 15.258 | 22.476 | 1.00 | 0.00 |
| H      |      |    |     |     |        |        |        |      |      |
| HETATM | 7848 | H3 | PRP | 520 | 36.706 | 15.689 | 21.050 | 1.00 | 0.00 |
| H      |      |    |     |     |        |        |        |      |      |
| HETATM | 7849 | C2 | PRP | 520 | 38.819 | 15.952 | 20.750 | 1.00 | 0.00 |
| C      |      |    |     |     |        |        |        |      |      |
| HETATM | 7850 | H4 | PRP | 520 | 38.987 | 14.960 | 20.330 | 1.00 | 0.00 |
| H      |      |    |     |     |        |        |        |      |      |
| HETATM | 7851 | O2 | PRP | 520 | 40.097 | 16.270 | 21.436 | 1.00 | 0.00 |
| O      |      |    |     |     |        |        |        |      |      |
| HETATM | 7852 | H5 | PRP | 520 | 40.817 | 15.948 | 20.889 | 1.00 | 0.00 |
| H      |      |    |     |     |        |        |        |      |      |
| HETATM | 7853 | C3 | PRP | 520 | 38.665 | 16.845 | 19.508 | 1.00 | 0.00 |
| C      |      |    |     |     |        |        |        |      |      |
| HETATM | 7854 | H6 | PRP | 520 | 39.298 | 16.565 | 18.666 | 1.00 | 0.00 |
| H      |      |    |     |     |        |        |        |      |      |
| HETATM | 7855 | H7 | PRP | 520 | 37.608 | 16.821 | 19.242 | 1.00 | 0.00 |
| H      |      |    |     |     |        |        |        |      |      |
| HETATM | 7856 | H8 | PRP | 520 | 38.902 | 17.874 | 19.781 | 1.00 | 0.00 |
| H      |      |    |     |     |        |        |        |      |      |
| HETATM | 7857 | O1 | PRP | 521 | 31.355 | 25.389 | 17.200 | 1.00 | 0.00 |
| O      |      |    |     |     |        |        |        |      |      |
| HETATM | 7858 | H1 | PRP | 521 | 30.855 | 24.965 | 16.498 | 1.00 | 0.00 |
| H      |      |    |     |     |        |        |        |      |      |
| HETATM | 7859 | C1 | PRP | 521 | 30.394 | 25.597 | 18.195 | 1.00 | 0.00 |
| C      |      |    |     |     |        |        |        |      |      |
| HETATM | 7860 | H2 | PRP | 521 | 29.730 | 26.399 | 17.873 | 1.00 | 0.00 |
| H      |      |    |     |     |        |        |        |      |      |
| HETATM | 7861 | H3 | PRP | 521 | 29.895 | 24.649 | 18.389 | 1.00 | 0.00 |
| H      |      |    |     |     |        |        |        |      |      |
| HETATM | 7862 | C2 | PRP | 521 | 30.972 | 26.067 | 19.570 | 1.00 | 0.00 |
| C      |      |    |     |     |        |        |        |      |      |
| HETATM | 7863 | H4 | PRP | 521 | 30.171 | 26.172 | 20.301 | 1.00 | 0.00 |
| H      |      |    |     |     |        |        |        |      |      |
| HETATM | 7864 | O2 | PRP | 521 | 31.658 | 27.313 | 19.390 | 1.00 | 0.00 |
| O      |      |    |     |     |        |        |        |      |      |
| HETATM | 7865 | H5 | PRP | 521 | 32.289 | 27.280 | 18.667 | 1.00 | 0.00 |
| H      |      |    |     |     |        |        |        |      |      |
| HETATM | 7866 | C3 | PRP | 521 | 31.954 | 25.085 | 20.173 | 1.00 | 0.00 |
| C      |      |    |     |     |        |        |        |      |      |
| HETATM | 7867 | H6 | PRP | 521 | 32.891 | 25.096 | 19.615 | 1.00 | 0.00 |
| H      |      |    |     |     |        |        |        |      |      |

|        |      |    |     |     |        |        |        |      |      |
|--------|------|----|-----|-----|--------|--------|--------|------|------|
| HETATM | 7868 | H7 | PRP | 521 | 32.167 | 25.388 | 21.199 | 1.00 | 0.00 |
| H      |      |    |     |     |        |        |        |      |      |
| HETATM | 7869 | H8 | PRP | 521 | 31.502 | 24.094 | 20.167 | 1.00 | 0.00 |
| H      |      |    |     |     |        |        |        |      |      |
| HETATM | 7870 | O1 | PRP | 522 | 3.189  | 20.973 | 16.752 | 1.00 | 0.00 |
| O      |      |    |     |     |        |        |        |      |      |
| HETATM | 7871 | H1 | PRP | 522 | 3.001  | 20.101 | 16.398 | 1.00 | 0.00 |
| H      |      |    |     |     |        |        |        |      |      |
| HETATM | 7872 | C1 | PRP | 522 | 4.053  | 20.881 | 17.888 | 1.00 | 0.00 |
| C      |      |    |     |     |        |        |        |      |      |
| HETATM | 7873 | H2 | PRP | 522 | 4.609  | 21.811 | 18.009 | 1.00 | 0.00 |
| H      |      |    |     |     |        |        |        |      |      |
| HETATM | 7874 | H3 | PRP | 522 | 3.334  | 20.652 | 18.674 | 1.00 | 0.00 |
| H      |      |    |     |     |        |        |        |      |      |
| HETATM | 7875 | C2 | PRP | 522 | 5.102  | 19.806 | 17.704 | 1.00 | 0.00 |
| C      |      |    |     |     |        |        |        |      |      |
| HETATM | 7876 | H4 | PRP | 522 | 5.907  | 20.229 | 17.104 | 1.00 | 0.00 |
| H      |      |    |     |     |        |        |        |      |      |
| HETATM | 7877 | O2 | PRP | 522 | 4.560  | 18.702 | 16.961 | 1.00 | 0.00 |
| O      |      |    |     |     |        |        |        |      |      |
| HETATM | 7878 | H5 | PRP | 522 | 5.203  | 17.990 | 17.004 | 1.00 | 0.00 |
| H      |      |    |     |     |        |        |        |      |      |
| HETATM | 7879 | C3 | PRP | 522 | 5.705  | 19.379 | 19.020 | 1.00 | 0.00 |
| C      |      |    |     |     |        |        |        |      |      |
| HETATM | 7880 | H6 | PRP | 522 | 6.406  | 20.163 | 19.307 | 1.00 | 0.00 |
| H      |      |    |     |     |        |        |        |      |      |
| HETATM | 7881 | H7 | PRP | 522 | 4.959  | 19.299 | 19.810 | 1.00 | 0.00 |
| H      |      |    |     |     |        |        |        |      |      |
| HETATM | 7882 | H8 | PRP | 522 | 6.095  | 18.366 | 18.928 | 1.00 | 0.00 |
| H      |      |    |     |     |        |        |        |      |      |
| HETATM | 7883 | O1 | PRP | 523 | 5.853  | 32.807 | 26.951 | 1.00 | 0.00 |
| O      |      |    |     |     |        |        |        |      |      |
| HETATM | 7884 | H1 | PRP | 523 | 5.498  | 32.960 | 27.830 | 1.00 | 0.00 |
| H      |      |    |     |     |        |        |        |      |      |
| HETATM | 7885 | C1 | PRP | 523 | 5.528  | 31.485 | 26.798 | 1.00 | 0.00 |
| C      |      |    |     |     |        |        |        |      |      |
| HETATM | 7886 | H2 | PRP | 523 | 4.465  | 31.393 | 26.574 | 1.00 | 0.00 |
| H      |      |    |     |     |        |        |        |      |      |
| HETATM | 7887 | H3 | PRP | 523 | 6.119  | 31.006 | 26.017 | 1.00 | 0.00 |
| H      |      |    |     |     |        |        |        |      |      |
| HETATM | 7888 | C2 | PRP | 523 | 5.774  | 30.788 | 28.188 | 1.00 | 0.00 |
| C      |      |    |     |     |        |        |        |      |      |
| HETATM | 7889 | H4 | PRP | 523 | 5.039  | 29.983 | 28.208 | 1.00 | 0.00 |
| H      |      |    |     |     |        |        |        |      |      |
| HETATM | 7890 | O2 | PRP | 523 | 5.500  | 31.714 | 29.290 | 1.00 | 0.00 |
| O      |      |    |     |     |        |        |        |      |      |
| HETATM | 7891 | H5 | PRP | 523 | 5.805  | 31.238 | 30.066 | 1.00 | 0.00 |
| H      |      |    |     |     |        |        |        |      |      |
| HETATM | 7892 | C3 | PRP | 523 | 7.223  | 30.376 | 28.383 | 1.00 | 0.00 |
| C      |      |    |     |     |        |        |        |      |      |
| HETATM | 7893 | H6 | PRP | 523 | 7.319  | 29.482 | 27.769 | 1.00 | 0.00 |
| H      |      |    |     |     |        |        |        |      |      |
| HETATM | 7894 | H7 | PRP | 523 | 7.986  | 31.128 | 28.181 | 1.00 | 0.00 |
| H      |      |    |     |     |        |        |        |      |      |
| HETATM | 7895 | H8 | PRP | 523 | 7.356  | 29.998 | 29.397 | 1.00 | 0.00 |
| H      |      |    |     |     |        |        |        |      |      |

|        |      |    |     |     |        |        |        |      |      |
|--------|------|----|-----|-----|--------|--------|--------|------|------|
| HETATM | 7896 | O1 | PRP | 524 | 5.867  | 36.819 | 22.150 | 1.00 | 0.00 |
| O      |      |    |     |     |        |        |        |      |      |
| HETATM | 7897 | H1 | PRP | 524 | 5.951  | 36.235 | 21.393 | 1.00 | 0.00 |
| H      |      |    |     |     |        |        |        |      |      |
| HETATM | 7898 | C1 | PRP | 524 | 7.098  | 37.179 | 22.726 | 1.00 | 0.00 |
| C      |      |    |     |     |        |        |        |      |      |
| HETATM | 7899 | H2 | PRP | 524 | 7.803  | 36.603 | 22.126 | 1.00 | 0.00 |
| H      |      |    |     |     |        |        |        |      |      |
| HETATM | 7900 | H3 | PRP | 524 | 7.179  | 38.266 | 22.719 | 1.00 | 0.00 |
| H      |      |    |     |     |        |        |        |      |      |
| HETATM | 7901 | C2 | PRP | 524 | 7.086  | 36.542 | 24.169 | 1.00 | 0.00 |
| C      |      |    |     |     |        |        |        |      |      |
| HETATM | 7902 | H4 | PRP | 524 | 6.527  | 35.608 | 24.220 | 1.00 | 0.00 |
| H      |      |    |     |     |        |        |        |      |      |
| HETATM | 7903 | O2 | PRP | 524 | 6.386  | 37.378 | 25.080 | 1.00 | 0.00 |
| O      |      |    |     |     |        |        |        |      |      |
| HETATM | 7904 | H5 | PRP | 524 | 6.582  | 37.082 | 25.972 | 1.00 | 0.00 |
| H      |      |    |     |     |        |        |        |      |      |
| HETATM | 7905 | C3 | PRP | 524 | 8.526  | 36.302 | 24.544 | 1.00 | 0.00 |
| C      |      |    |     |     |        |        |        |      |      |
| HETATM | 7906 | H6 | PRP | 524 | 9.183  | 37.170 | 24.501 | 1.00 | 0.00 |
| H      |      |    |     |     |        |        |        |      |      |
| HETATM | 7907 | H7 | PRP | 524 | 8.620  | 35.893 | 25.550 | 1.00 | 0.00 |
| H      |      |    |     |     |        |        |        |      |      |
| HETATM | 7908 | H8 | PRP | 524 | 8.940  | 35.610 | 23.811 | 1.00 | 0.00 |
| H      |      |    |     |     |        |        |        |      |      |
| HETATM | 7909 | O1 | PRP | 525 | 9.447  | 28.509 | 32.969 | 1.00 | 0.00 |
| O      |      |    |     |     |        |        |        |      |      |
| HETATM | 7910 | H1 | PRP | 525 | 9.039  | 27.650 | 33.095 | 1.00 | 0.00 |
| H      |      |    |     |     |        |        |        |      |      |
| HETATM | 7911 | C1 | PRP | 525 | 10.216 | 28.430 | 31.813 | 1.00 | 0.00 |
| C      |      |    |     |     |        |        |        |      |      |
| HETATM | 7912 | H2 | PRP | 525 | 10.619 | 29.429 | 31.645 | 1.00 | 0.00 |
| H      |      |    |     |     |        |        |        |      |      |
| HETATM | 7913 | H3 | PRP | 525 | 11.061 | 27.749 | 31.915 | 1.00 | 0.00 |
| H      |      |    |     |     |        |        |        |      |      |
| HETATM | 7914 | C2 | PRP | 525 | 9.441  | 28.012 | 30.576 | 1.00 | 0.00 |
| C      |      |    |     |     |        |        |        |      |      |
| HETATM | 7915 | H4 | PRP | 525 | 8.596  | 28.695 | 30.499 | 1.00 | 0.00 |
| H      |      |    |     |     |        |        |        |      |      |
| HETATM | 7916 | O2 | PRP | 525 | 9.123  | 26.686 | 30.689 | 1.00 | 0.00 |
| O      |      |    |     |     |        |        |        |      |      |
| HETATM | 7917 | H5 | PRP | 525 | 8.802  | 26.312 | 29.866 | 1.00 | 0.00 |
| H      |      |    |     |     |        |        |        |      |      |
| HETATM | 7918 | C3 | PRP | 525 | 10.254 | 28.241 | 29.280 | 1.00 | 0.00 |
| C      |      |    |     |     |        |        |        |      |      |
| HETATM | 7919 | H6 | PRP | 525 | 9.630  | 28.196 | 28.387 | 1.00 | 0.00 |
| H      |      |    |     |     |        |        |        |      |      |
| HETATM | 7920 | H7 | PRP | 525 | 10.700 | 29.234 | 29.237 | 1.00 | 0.00 |
| H      |      |    |     |     |        |        |        |      |      |
| HETATM | 7921 | H8 | PRP | 525 | 11.103 | 27.564 | 29.192 | 1.00 | 0.00 |
| H      |      |    |     |     |        |        |        |      |      |
| HETATM | 7922 | O1 | PRP | 526 | 19.314 | 34.285 | 33.275 | 1.00 | 0.00 |
| O      |      |    |     |     |        |        |        |      |      |
| HETATM | 7923 | H1 | PRP | 526 | 19.149 | 35.140 | 32.871 | 1.00 | 0.00 |
| H      |      |    |     |     |        |        |        |      |      |

|        |      |    |     |     |        |        |        |      |      |
|--------|------|----|-----|-----|--------|--------|--------|------|------|
| HETATM | 7924 | C1 | PRP | 526 | 20.217 | 34.494 | 34.366 | 1.00 | 0.00 |
| C      |      |    |     |     |        |        |        |      |      |
| HETATM | 7925 | H2 | PRP | 526 | 20.106 | 33.643 | 35.039 | 1.00 | 0.00 |
| H      |      |    |     |     |        |        |        |      |      |
| HETATM | 7926 | H3 | PRP | 526 | 21.243 | 34.569 | 34.005 | 1.00 | 0.00 |
| H      |      |    |     |     |        |        |        |      |      |
| HETATM | 7927 | C2 | PRP | 526 | 19.810 | 35.802 | 35.084 | 1.00 | 0.00 |
| C      |      |    |     |     |        |        |        |      |      |
| HETATM | 7928 | H4 | PRP | 526 | 18.720 | 35.832 | 35.062 | 1.00 | 0.00 |
| H      |      |    |     |     |        |        |        |      |      |
| HETATM | 7929 | O2 | PRP | 526 | 20.282 | 36.957 | 34.410 | 1.00 | 0.00 |
| O      |      |    |     |     |        |        |        |      |      |
| HETATM | 7930 | H5 | PRP | 526 | 19.707 | 37.697 | 34.617 | 1.00 | 0.00 |
| H      |      |    |     |     |        |        |        |      |      |
| HETATM | 7931 | C3 | PRP | 526 | 20.250 | 35.831 | 36.555 | 1.00 | 0.00 |
| C      |      |    |     |     |        |        |        |      |      |
| HETATM | 7932 | H6 | PRP | 526 | 19.856 | 36.693 | 37.094 | 1.00 | 0.00 |
| H      |      |    |     |     |        |        |        |      |      |
| HETATM | 7933 | H7 | PRP | 526 | 19.901 | 35.001 | 37.169 | 1.00 | 0.00 |
| H      |      |    |     |     |        |        |        |      |      |
| HETATM | 7934 | H8 | PRP | 526 | 21.334 | 35.887 | 36.644 | 1.00 | 0.00 |
| H      |      |    |     |     |        |        |        |      |      |
| HETATM | 7935 | O1 | PRP | 527 | 16.085 | 36.285 | 40.585 | 1.00 | 0.00 |
| O      |      |    |     |     |        |        |        |      |      |
| HETATM | 7936 | H1 | PRP | 527 | 15.976 | 37.237 | 40.633 | 1.00 | 0.00 |
| H      |      |    |     |     |        |        |        |      |      |
| HETATM | 7937 | C1 | PRP | 527 | 16.921 | 36.017 | 39.503 | 1.00 | 0.00 |
| C      |      |    |     |     |        |        |        |      |      |
| HETATM | 7938 | H2 | PRP | 527 | 17.921 | 36.352 | 39.777 | 1.00 | 0.00 |
| H      |      |    |     |     |        |        |        |      |      |
| HETATM | 7939 | H3 | PRP | 527 | 17.029 | 34.954 | 39.288 | 1.00 | 0.00 |
| H      |      |    |     |     |        |        |        |      |      |
| HETATM | 7940 | C2 | PRP | 527 | 16.566 | 36.948 | 38.352 | 1.00 | 0.00 |
| C      |      |    |     |     |        |        |        |      |      |
| HETATM | 7941 | H4 | PRP | 527 | 17.273 | 36.675 | 37.569 | 1.00 | 0.00 |
| H      |      |    |     |     |        |        |        |      |      |
| HETATM | 7942 | O2 | PRP | 527 | 16.702 | 38.304 | 38.535 | 1.00 | 0.00 |
| O      |      |    |     |     |        |        |        |      |      |
| HETATM | 7943 | H5 | PRP | 527 | 17.613 | 38.502 | 38.762 | 1.00 | 0.00 |
| H      |      |    |     |     |        |        |        |      |      |
| HETATM | 7944 | C3 | PRP | 527 | 15.155 | 36.593 | 37.806 | 1.00 | 0.00 |
| C      |      |    |     |     |        |        |        |      |      |
| HETATM | 7945 | H6 | PRP | 527 | 15.080 | 35.521 | 37.620 | 1.00 | 0.00 |
| H      |      |    |     |     |        |        |        |      |      |
| HETATM | 7946 | H7 | PRP | 527 | 14.475 | 36.949 | 38.579 | 1.00 | 0.00 |
| H      |      |    |     |     |        |        |        |      |      |
| HETATM | 7947 | H8 | PRP | 527 | 15.001 | 37.123 | 36.866 | 1.00 | 0.00 |
| H      |      |    |     |     |        |        |        |      |      |
| HETATM | 7948 | O1 | PRP | 528 | 9.349  | 43.782 | 15.595 | 1.00 | 0.00 |
| O      |      |    |     |     |        |        |        |      |      |
| HETATM | 7949 | H1 | PRP | 528 | 9.219  | 44.569 | 15.061 | 1.00 | 0.00 |
| H      |      |    |     |     |        |        |        |      |      |
| HETATM | 7950 | C1 | PRP | 528 | 8.106  | 43.202 | 15.579 | 1.00 | 0.00 |
| C      |      |    |     |     |        |        |        |      |      |
| HETATM | 7951 | H2 | PRP | 528 | 7.737  | 43.077 | 14.561 | 1.00 | 0.00 |
| H      |      |    |     |     |        |        |        |      |      |

|        |      |    |     |     |       |        |        |      |      |
|--------|------|----|-----|-----|-------|--------|--------|------|------|
| HETATM | 7952 | H3 | PRP | 528 | 8.237 | 42.213 | 16.018 | 1.00 | 0.00 |
| H      |      |    |     |     |       |        |        |      |      |
| HETATM | 7953 | C2 | PRP | 528 | 7.155 | 44.038 | 16.476 | 1.00 | 0.00 |
| C      |      |    |     |     |       |        |        |      |      |
| HETATM | 7954 | H4 | PRP | 528 | 7.301 | 45.115 | 16.388 | 1.00 | 0.00 |
| H      |      |    |     |     |       |        |        |      |      |
| HETATM | 7955 | O2 | PRP | 528 | 7.376 | 43.742 | 17.837 | 1.00 | 0.00 |
| O      |      |    |     |     |       |        |        |      |      |
| HETATM | 7956 | H5 | PRP | 528 | 8.181 | 44.151 | 18.164 | 1.00 | 0.00 |
| H      |      |    |     |     |       |        |        |      |      |
| HETATM | 7957 | C3 | PRP | 528 | 5.756 | 43.703 | 16.018 | 1.00 | 0.00 |
| C      |      |    |     |     |       |        |        |      |      |
| HETATM | 7958 | H6 | PRP | 528 | 5.579 | 42.645 | 16.209 | 1.00 | 0.00 |
| H      |      |    |     |     |       |        |        |      |      |
| HETATM | 7959 | H7 | PRP | 528 | 5.027 | 44.262 | 16.606 | 1.00 | 0.00 |
| H      |      |    |     |     |       |        |        |      |      |
| HETATM | 7960 | H8 | PRP | 528 | 5.664 | 43.799 | 14.936 | 1.00 | 0.00 |
| H      |      |    |     |     |       |        |        |      |      |
| HETATM | 7961 | O1 | PRP | 529 | 2.542 | 21.063 | 34.451 | 1.00 | 0.00 |
| O      |      |    |     |     |       |        |        |      |      |
| HETATM | 7962 | H1 | PRP | 529 | 1.932 | 20.464 | 34.886 | 1.00 | 0.00 |
| H      |      |    |     |     |       |        |        |      |      |
| HETATM | 7963 | C1 | PRP | 529 | 3.118 | 20.400 | 33.359 | 1.00 | 0.00 |
| C      |      |    |     |     |       |        |        |      |      |
| HETATM | 7964 | H2 | PRP | 529 | 3.924 | 19.792 | 33.771 | 1.00 | 0.00 |
| H      |      |    |     |     |       |        |        |      |      |
| HETATM | 7965 | H3 | PRP | 529 | 2.472 | 19.985 | 32.585 | 1.00 | 0.00 |
| H      |      |    |     |     |       |        |        |      |      |
| HETATM | 7966 | C2 | PRP | 529 | 3.845 | 21.480 | 32.589 | 1.00 | 0.00 |
| C      |      |    |     |     |       |        |        |      |      |
| HETATM | 7967 | H4 | PRP | 529 | 4.533 | 22.028 | 33.233 | 1.00 | 0.00 |
| H      |      |    |     |     |       |        |        |      |      |
| HETATM | 7968 | O2 | PRP | 529 | 2.848 | 22.188 | 31.915 | 1.00 | 0.00 |
| O      |      |    |     |     |       |        |        |      |      |
| HETATM | 7969 | H5 | PRP | 529 | 2.346 | 22.490 | 32.675 | 1.00 | 0.00 |
| H      |      |    |     |     |       |        |        |      |      |
| HETATM | 7970 | C3 | PRP | 529 | 4.784 | 20.820 | 31.522 | 1.00 | 0.00 |
| C      |      |    |     |     |       |        |        |      |      |
| HETATM | 7971 | H6 | PRP | 529 | 5.235 | 21.658 | 30.989 | 1.00 | 0.00 |
| H      |      |    |     |     |       |        |        |      |      |
| HETATM | 7972 | H7 | PRP | 529 | 5.520 | 20.171 | 31.995 | 1.00 | 0.00 |
| H      |      |    |     |     |       |        |        |      |      |
| HETATM | 7973 | H8 | PRP | 529 | 4.193 | 20.270 | 30.790 | 1.00 | 0.00 |
| H      |      |    |     |     |       |        |        |      |      |
| HETATM | 7974 | O1 | PRP | 530 | 5.703 | 23.106 | 37.628 | 1.00 | 0.00 |
| O      |      |    |     |     |       |        |        |      |      |
| HETATM | 7975 | H1 | PRP | 530 | 6.528 | 22.823 | 38.029 | 1.00 | 0.00 |
| H      |      |    |     |     |       |        |        |      |      |
| HETATM | 7976 | C1 | PRP | 530 | 5.104 | 21.961 | 37.019 | 1.00 | 0.00 |
| C      |      |    |     |     |       |        |        |      |      |
| HETATM | 7977 | H2 | PRP | 530 | 4.388 | 22.214 | 36.237 | 1.00 | 0.00 |
| H      |      |    |     |     |       |        |        |      |      |
| HETATM | 7978 | H3 | PRP | 530 | 5.909 | 21.352 | 36.608 | 1.00 | 0.00 |
| H      |      |    |     |     |       |        |        |      |      |
| HETATM | 7979 | C2 | PRP | 530 | 4.431 | 21.171 | 38.143 | 1.00 | 0.00 |
| C      |      |    |     |     |       |        |        |      |      |



|        |      |    |     |     |        |        |        |      |      |
|--------|------|----|-----|-----|--------|--------|--------|------|------|
| HETATM | 7980 | H4 | PRP | 530 | 3.656  | 21.833 | 38.531 | 1.00 | 0.00 |
| H      |      |    |     |     |        |        |        |      |      |
| HETATM | 7981 | O2 | PRP | 530 | 5.455  | 20.846 | 39.057 | 1.00 | 0.00 |
| O      |      |    |     |     |        |        |        |      |      |
| HETATM | 7982 | H5 | PRP | 530 | 5.721  | 21.704 | 39.397 | 1.00 | 0.00 |
| H      |      |    |     |     |        |        |        |      |      |
| HETATM | 7983 | C3 | PRP | 530 | 3.709  | 19.936 | 37.654 | 1.00 | 0.00 |
| C      |      |    |     |     |        |        |        |      |      |
| HETATM | 7984 | H6 | PRP | 530 | 4.455  | 19.183 | 37.401 | 1.00 | 0.00 |
| H      |      |    |     |     |        |        |        |      |      |
| HETATM | 7985 | H7 | PRP | 530 | 3.021  | 19.401 | 38.308 | 1.00 | 0.00 |
| H      |      |    |     |     |        |        |        |      |      |
| HETATM | 7986 | H8 | PRP | 530 | 3.090  | 20.140 | 36.781 | 1.00 | 0.00 |
| H      |      |    |     |     |        |        |        |      |      |
| HETATM | 7987 | O1 | PRP | 531 | 20.803 | 41.752 | 22.272 | 1.00 | 0.00 |
| O      |      |    |     |     |        |        |        |      |      |
| HETATM | 7988 | H1 | PRP | 531 | 20.495 | 41.289 | 21.490 | 1.00 | 0.00 |
| H      |      |    |     |     |        |        |        |      |      |
| HETATM | 7989 | C1 | PRP | 531 | 22.193 | 41.573 | 22.309 | 1.00 | 0.00 |
| C      |      |    |     |     |        |        |        |      |      |
| HETATM | 7990 | H2 | PRP | 531 | 22.442 | 40.648 | 21.788 | 1.00 | 0.00 |
| H      |      |    |     |     |        |        |        |      |      |
| HETATM | 7991 | H3 | PRP | 531 | 22.716 | 42.391 | 21.812 | 1.00 | 0.00 |
| H      |      |    |     |     |        |        |        |      |      |
| HETATM | 7992 | C2 | PRP | 531 | 22.784 | 41.406 | 23.797 | 1.00 | 0.00 |
| C      |      |    |     |     |        |        |        |      |      |
| HETATM | 7993 | H4 | PRP | 531 | 23.869 | 41.326 | 23.728 | 1.00 | 0.00 |
| H      |      |    |     |     |        |        |        |      |      |
| HETATM | 7994 | O2 | PRP | 531 | 22.225 | 40.295 | 24.354 | 1.00 | 0.00 |
| O      |      |    |     |     |        |        |        |      |      |
| HETATM | 7995 | H5 | PRP | 531 | 21.275 | 40.431 | 24.358 | 1.00 | 0.00 |
| H      |      |    |     |     |        |        |        |      |      |
| HETATM | 7996 | C3 | PRP | 531 | 22.433 | 42.592 | 24.684 | 1.00 | 0.00 |
| C      |      |    |     |     |        |        |        |      |      |
| HETATM | 7997 | H6 | PRP | 531 | 23.290 | 43.246 | 24.525 | 1.00 | 0.00 |
| H      |      |    |     |     |        |        |        |      |      |
| HETATM | 7998 | H7 | PRP | 531 | 21.506 | 43.084 | 24.389 | 1.00 | 0.00 |
| H      |      |    |     |     |        |        |        |      |      |
| HETATM | 7999 | H8 | PRP | 531 | 22.305 | 42.370 | 25.744 | 1.00 | 0.00 |
| H      |      |    |     |     |        |        |        |      |      |
| HETATM | 8000 | O1 | PRP | 532 | 3.062  | 13.380 | 24.063 | 1.00 | 0.00 |
| O      |      |    |     |     |        |        |        |      |      |
| HETATM | 8001 | H1 | PRP | 532 | 2.110  | 13.448 | 23.965 | 1.00 | 0.00 |
| H      |      |    |     |     |        |        |        |      |      |
| HETATM | 8002 | C1 | PRP | 532 | 3.475  | 12.047 | 24.077 | 1.00 | 0.00 |
| C      |      |    |     |     |        |        |        |      |      |
| HETATM | 8003 | H2 | PRP | 532 | 2.807  | 11.438 | 24.686 | 1.00 | 0.00 |
| H      |      |    |     |     |        |        |        |      |      |
| HETATM | 8004 | H3 | PRP | 532 | 3.397  | 11.635 | 23.071 | 1.00 | 0.00 |
| H      |      |    |     |     |        |        |        |      |      |
| HETATM | 8005 | C2 | PRP | 532 | 4.868  | 12.021 | 24.616 | 1.00 | 0.00 |
| C      |      |    |     |     |        |        |        |      |      |
| HETATM | 8006 | H4 | PRP | 532 | 4.976  | 12.586 | 25.542 | 1.00 | 0.00 |
| H      |      |    |     |     |        |        |        |      |      |
| HETATM | 8007 | O2 | PRP | 532 | 5.769  | 12.461 | 23.601 | 1.00 | 0.00 |
| O      |      |    |     |     |        |        |        |      |      |

|        |      |    |     |     |        |        |        |      |      |
|--------|------|----|-----|-----|--------|--------|--------|------|------|
| HETATM | 8008 | H5 | PRP | 532 | 5.861  | 13.416 | 23.555 | 1.00 | 0.00 |
| H      |      |    |     |     |        |        |        |      |      |
| HETATM | 8009 | C3 | PRP | 532 | 5.239  | 10.583 | 24.904 | 1.00 | 0.00 |
| C      |      |    |     |     |        |        |        |      |      |
| HETATM | 8010 | H6 | PRP | 532 | 4.566  | 10.159 | 25.650 | 1.00 | 0.00 |
| H      |      |    |     |     |        |        |        |      |      |
| HETATM | 8011 | H7 | PRP | 532 | 5.116  | 9.975  | 24.008 | 1.00 | 0.00 |
| H      |      |    |     |     |        |        |        |      |      |
| HETATM | 8012 | H8 | PRP | 532 | 6.273  | 10.433 | 25.214 | 1.00 | 0.00 |
| H      |      |    |     |     |        |        |        |      |      |
| HETATM | 8013 | O1 | PRP | 533 | 9.779  | 15.248 | 28.169 | 1.00 | 0.00 |
| O      |      |    |     |     |        |        |        |      |      |
| HETATM | 8014 | H1 | PRP | 533 | 10.235 | 15.384 | 29.003 | 1.00 | 0.00 |
| H      |      |    |     |     |        |        |        |      |      |
| HETATM | 8015 | C1 | PRP | 533 | 9.997  | 13.923 | 27.645 | 1.00 | 0.00 |
| C      |      |    |     |     |        |        |        |      |      |
| HETATM | 8016 | H2 | PRP | 533 | 11.058 | 13.741 | 27.476 | 1.00 | 0.00 |
| H      |      |    |     |     |        |        |        |      |      |
| HETATM | 8017 | H3 | PRP | 533 | 9.544  | 13.131 | 28.242 | 1.00 | 0.00 |
| H      |      |    |     |     |        |        |        |      |      |
| HETATM | 8018 | C2 | PRP | 533 | 9.298  | 13.880 | 26.229 | 1.00 | 0.00 |
| C      |      |    |     |     |        |        |        |      |      |
| HETATM | 8019 | H4 | PRP | 533 | 9.596  | 12.988 | 25.678 | 1.00 | 0.00 |
| H      |      |    |     |     |        |        |        |      |      |
| HETATM | 8020 | O2 | PRP | 533 | 9.799  | 14.992 | 25.558 | 1.00 | 0.00 |
| O      |      |    |     |     |        |        |        |      |      |
| HETATM | 8021 | H5 | PRP | 533 | 9.654  | 15.717 | 26.170 | 1.00 | 0.00 |
| H      |      |    |     |     |        |        |        |      |      |
| HETATM | 8022 | C3 | PRP | 533 | 7.784  | 14.080 | 26.110 | 1.00 | 0.00 |
| C      |      |    |     |     |        |        |        |      |      |
| HETATM | 8023 | H6 | PRP | 533 | 7.505  | 15.131 | 26.183 | 1.00 | 0.00 |
| H      |      |    |     |     |        |        |        |      |      |
| HETATM | 8024 | H7 | PRP | 533 | 7.223  | 13.614 | 25.300 | 1.00 | 0.00 |
| H      |      |    |     |     |        |        |        |      |      |
| HETATM | 8025 | H8 | PRP | 533 | 7.320  | 13.556 | 26.945 | 1.00 | 0.00 |
| H      |      |    |     |     |        |        |        |      |      |
| HETATM | 8026 | O1 | PRP | 534 | 20.708 | 40.019 | 32.843 | 1.00 | 0.00 |
| O      |      |    |     |     |        |        |        |      |      |
| HETATM | 8027 | H1 | PRP | 534 | 21.561 | 39.621 | 33.032 | 1.00 | 0.00 |
| H      |      |    |     |     |        |        |        |      |      |
| HETATM | 8028 | C1 | PRP | 534 | 20.610 | 40.291 | 31.424 | 1.00 | 0.00 |
| C      |      |    |     |     |        |        |        |      |      |
| HETATM | 8029 | H2 | PRP | 534 | 20.396 | 41.357 | 31.356 | 1.00 | 0.00 |
| H      |      |    |     |     |        |        |        |      |      |
| HETATM | 8030 | H3 | PRP | 534 | 21.522 | 40.112 | 30.854 | 1.00 | 0.00 |
| H      |      |    |     |     |        |        |        |      |      |
| HETATM | 8031 | C2 | PRP | 534 | 19.420 | 39.484 | 30.740 | 1.00 | 0.00 |
| C      |      |    |     |     |        |        |        |      |      |
| HETATM | 8032 | H4 | PRP | 534 | 18.450 | 39.720 | 31.179 | 1.00 | 0.00 |
| H      |      |    |     |     |        |        |        |      |      |
| HETATM | 8033 | O2 | PRP | 534 | 19.634 | 38.092 | 30.932 | 1.00 | 0.00 |
| O      |      |    |     |     |        |        |        |      |      |
| HETATM | 8034 | H5 | PRP | 534 | 19.129 | 37.922 | 31.731 | 1.00 | 0.00 |
| H      |      |    |     |     |        |        |        |      |      |
| HETATM | 8035 | C3 | PRP | 534 | 19.384 | 39.817 | 29.242 | 1.00 | 0.00 |
| C      |      |    |     |     |        |        |        |      |      |

|        |      |    |     |     |        |        |        |      |      |
|--------|------|----|-----|-----|--------|--------|--------|------|------|
| HETATM | 8036 | H6 | PRP | 534 | 19.149 | 40.869 | 29.084 | 1.00 | 0.00 |
| H      |      |    |     |     |        |        |        |      |      |
| HETATM | 8037 | H7 | PRP | 534 | 20.350 | 39.721 | 28.747 | 1.00 | 0.00 |
| H      |      |    |     |     |        |        |        |      |      |
| HETATM | 8038 | H8 | PRP | 534 | 18.737 | 39.094 | 28.745 | 1.00 | 0.00 |
| H      |      |    |     |     |        |        |        |      |      |
| HETATM | 8039 | O1 | PRP | 535 | 16.638 | 8.089  | 17.042 | 1.00 | 0.00 |
| O      |      |    |     |     |        |        |        |      |      |
| HETATM | 8040 | H1 | PRP | 535 | 16.879 | 7.279  | 16.588 | 1.00 | 0.00 |
| H      |      |    |     |     |        |        |        |      |      |
| HETATM | 8041 | C1 | PRP | 535 | 15.260 | 8.118  | 16.977 | 1.00 | 0.00 |
| C      |      |    |     |     |        |        |        |      |      |
| HETATM | 8042 | H2 | PRP | 535 | 14.871 | 7.811  | 16.006 | 1.00 | 0.00 |
| H      |      |    |     |     |        |        |        |      |      |
| HETATM | 8043 | H3 | PRP | 535 | 14.868 | 7.444  | 17.739 | 1.00 | 0.00 |
| H      |      |    |     |     |        |        |        |      |      |
| HETATM | 8044 | C2 | PRP | 535 | 14.729 | 9.493  | 17.290 | 1.00 | 0.00 |
| C      |      |    |     |     |        |        |        |      |      |
| HETATM | 8045 | H4 | PRP | 535 | 13.641 | 9.438  | 17.274 | 1.00 | 0.00 |
| H      |      |    |     |     |        |        |        |      |      |
| HETATM | 8046 | O2 | PRP | 535 | 15.272 | 10.450 | 16.353 | 1.00 | 0.00 |
| O      |      |    |     |     |        |        |        |      |      |
| HETATM | 8047 | H5 | PRP | 535 | 16.225 | 10.483 | 16.465 | 1.00 | 0.00 |
| H      |      |    |     |     |        |        |        |      |      |
| HETATM | 8048 | C3 | PRP | 535 | 15.042 | 10.005 | 18.756 | 1.00 | 0.00 |
| C      |      |    |     |     |        |        |        |      |      |
| HETATM | 8049 | H6 | PRP | 535 | 14.559 | 9.199  | 19.308 | 1.00 | 0.00 |
| H      |      |    |     |     |        |        |        |      |      |
| HETATM | 8050 | H7 | PRP | 535 | 16.127 | 10.007 | 18.861 | 1.00 | 0.00 |
| H      |      |    |     |     |        |        |        |      |      |
| HETATM | 8051 | H8 | PRP | 535 | 14.565 | 10.947 | 19.025 | 1.00 | 0.00 |
| H      |      |    |     |     |        |        |        |      |      |
| HETATM | 8052 | O1 | PRP | 536 | 12.164 | 17.118 | 27.496 | 1.00 | 0.00 |
| O      |      |    |     |     |        |        |        |      |      |
| HETATM | 8053 | H1 | PRP | 536 | 11.382 | 16.628 | 27.760 | 1.00 | 0.00 |
| H      |      |    |     |     |        |        |        |      |      |
| HETATM | 8054 | C1 | PRP | 536 | 13.288 | 16.640 | 28.171 | 1.00 | 0.00 |
| C      |      |    |     |     |        |        |        |      |      |
| HETATM | 8055 | H2 | PRP | 536 | 14.204 | 17.130 | 27.839 | 1.00 | 0.00 |
| H      |      |    |     |     |        |        |        |      |      |
| HETATM | 8056 | H3 | PRP | 536 | 13.127 | 16.884 | 29.222 | 1.00 | 0.00 |
| H      |      |    |     |     |        |        |        |      |      |
| HETATM | 8057 | C2 | PRP | 536 | 13.467 | 15.144 | 28.086 | 1.00 | 0.00 |
| C      |      |    |     |     |        |        |        |      |      |
| HETATM | 8058 | H4 | PRP | 536 | 13.042 | 14.814 | 27.138 | 1.00 | 0.00 |
| H      |      |    |     |     |        |        |        |      |      |
| HETATM | 8059 | O2 | PRP | 536 | 12.628 | 14.605 | 29.147 | 1.00 | 0.00 |
| O      |      |    |     |     |        |        |        |      |      |
| HETATM | 8060 | H5 | PRP | 536 | 12.725 | 13.652 | 29.217 | 1.00 | 0.00 |
| H      |      |    |     |     |        |        |        |      |      |
| HETATM | 8061 | C3 | PRP | 536 | 14.929 | 14.774 | 28.397 | 1.00 | 0.00 |
| C      |      |    |     |     |        |        |        |      |      |
| HETATM | 8062 | H6 | PRP | 536 | 15.250 | 15.093 | 29.389 | 1.00 | 0.00 |
| H      |      |    |     |     |        |        |        |      |      |
| HETATM | 8063 | H7 | PRP | 536 | 15.026 | 13.702 | 28.226 | 1.00 | 0.00 |
| H      |      |    |     |     |        |        |        |      |      |

|        |      |    |     |     |        |        |        |      |      |
|--------|------|----|-----|-----|--------|--------|--------|------|------|
| HETATM | 8064 | H8 | PRP | 536 | 15.538 | 15.258 | 27.634 | 1.00 | 0.00 |
| H      |      |    |     |     |        |        |        |      |      |
| HETATM | 8065 | O1 | PRP | 537 | 30.956 | 38.468 | 13.692 | 1.00 | 0.00 |
| O      |      |    |     |     |        |        |        |      |      |
| HETATM | 8066 | H1 | PRP | 537 | 30.107 | 38.299 | 13.277 | 1.00 | 0.00 |
| H      |      |    |     |     |        |        |        |      |      |
| HETATM | 8067 | C1 | PRP | 537 | 30.903 | 39.866 | 13.851 | 1.00 | 0.00 |
| C      |      |    |     |     |        |        |        |      |      |
| HETATM | 8068 | H2 | PRP | 537 | 30.033 | 40.117 | 14.457 | 1.00 | 0.00 |
| H      |      |    |     |     |        |        |        |      |      |
| HETATM | 8069 | H3 | PRP | 537 | 31.807 | 40.200 | 14.361 | 1.00 | 0.00 |
| H      |      |    |     |     |        |        |        |      |      |
| HETATM | 8070 | C2 | PRP | 537 | 30.642 | 40.596 | 12.534 | 1.00 | 0.00 |
| C      |      |    |     |     |        |        |        |      |      |
| HETATM | 8071 | H4 | PRP | 537 | 30.604 | 41.639 | 12.850 | 1.00 | 0.00 |
| H      |      |    |     |     |        |        |        |      |      |
| HETATM | 8072 | O2 | PRP | 537 | 29.382 | 40.200 | 12.085 | 1.00 | 0.00 |
| O      |      |    |     |     |        |        |        |      |      |
| HETATM | 8073 | H5 | PRP | 537 | 29.183 | 40.854 | 11.411 | 1.00 | 0.00 |
| H      |      |    |     |     |        |        |        |      |      |
| HETATM | 8074 | C3 | PRP | 537 | 31.661 | 40.169 | 11.476 | 1.00 | 0.00 |
| C      |      |    |     |     |        |        |        |      |      |
| HETATM | 8075 | H6 | PRP | 537 | 31.404 | 39.156 | 11.167 | 1.00 | 0.00 |
| H      |      |    |     |     |        |        |        |      |      |
| HETATM | 8076 | H7 | PRP | 537 | 31.468 | 40.736 | 10.565 | 1.00 | 0.00 |
| H      |      |    |     |     |        |        |        |      |      |
| HETATM | 8077 | H8 | PRP | 537 | 32.706 | 40.359 | 11.721 | 1.00 | 0.00 |
| H      |      |    |     |     |        |        |        |      |      |
| HETATM | 8078 | O1 | PRP | 538 | 13.088 | 18.262 | 16.748 | 1.00 | 0.00 |
| O      |      |    |     |     |        |        |        |      |      |
| HETATM | 8079 | H1 | PRP | 538 | 12.278 | 18.747 | 16.922 | 1.00 | 0.00 |
| H      |      |    |     |     |        |        |        |      |      |
| HETATM | 8080 | C1 | PRP | 538 | 14.064 | 19.126 | 17.149 | 1.00 | 0.00 |
| C      |      |    |     |     |        |        |        |      |      |
| HETATM | 8081 | H2 | PRP | 538 | 15.061 | 18.719 | 16.977 | 1.00 | 0.00 |
| H      |      |    |     |     |        |        |        |      |      |
| HETATM | 8082 | H3 | PRP | 538 | 13.981 | 20.019 | 16.528 | 1.00 | 0.00 |
| H      |      |    |     |     |        |        |        |      |      |
| HETATM | 8083 | C2 | PRP | 538 | 13.849 | 19.291 | 18.650 | 1.00 | 0.00 |
| C      |      |    |     |     |        |        |        |      |      |
| HETATM | 8084 | H4 | PRP | 538 | 13.632 | 18.342 | 19.139 | 1.00 | 0.00 |
| H      |      |    |     |     |        |        |        |      |      |
| HETATM | 8085 | O2 | PRP | 538 | 12.649 | 20.011 | 18.863 | 1.00 | 0.00 |
| O      |      |    |     |     |        |        |        |      |      |
| HETATM | 8086 | H5 | PRP | 538 | 12.301 | 19.921 | 19.754 | 1.00 | 0.00 |
| H      |      |    |     |     |        |        |        |      |      |
| HETATM | 8087 | C3 | PRP | 538 | 14.991 | 19.933 | 19.311 | 1.00 | 0.00 |
| C      |      |    |     |     |        |        |        |      |      |
| HETATM | 8088 | H6 | PRP | 538 | 14.906 | 19.856 | 20.395 | 1.00 | 0.00 |
| H      |      |    |     |     |        |        |        |      |      |
| HETATM | 8089 | H7 | PRP | 538 | 15.910 | 19.512 | 18.903 | 1.00 | 0.00 |
| H      |      |    |     |     |        |        |        |      |      |
| HETATM | 8090 | H8 | PRP | 538 | 14.897 | 20.995 | 19.086 | 1.00 | 0.00 |
| H      |      |    |     |     |        |        |        |      |      |
| HETATM | 8091 | O1 | PRP | 539 | 19.111 | 14.164 | 15.314 | 1.00 | 0.00 |
| O      |      |    |     |     |        |        |        |      |      |

|        |      |    |     |     |        |        |        |      |      |
|--------|------|----|-----|-----|--------|--------|--------|------|------|
| HETATM | 8092 | H1 | PRP | 539 | 19.900 | 14.407 | 14.823 | 1.00 | 0.00 |
| H      |      |    |     |     |        |        |        |      |      |
| HETATM | 8093 | C1 | PRP | 539 | 19.067 | 15.188 | 16.335 | 1.00 | 0.00 |
| C      |      |    |     |     |        |        |        |      |      |
| HETATM | 8094 | H2 | PRP | 539 | 18.451 | 14.750 | 17.121 | 1.00 | 0.00 |
| H      |      |    |     |     |        |        |        |      |      |
| HETATM | 8095 | H3 | PRP | 539 | 20.054 | 15.371 | 16.761 | 1.00 | 0.00 |
| H      |      |    |     |     |        |        |        |      |      |
| HETATM | 8096 | C2 | PRP | 539 | 18.403 | 16.503 | 15.812 | 1.00 | 0.00 |
| C      |      |    |     |     |        |        |        |      |      |
| HETATM | 8097 | H4 | PRP | 539 | 17.469 | 16.175 | 15.354 | 1.00 | 0.00 |
| H      |      |    |     |     |        |        |        |      |      |
| HETATM | 8098 | O2 | PRP | 539 | 19.131 | 17.313 | 14.963 | 1.00 | 0.00 |
| O      |      |    |     |     |        |        |        |      |      |
| HETATM | 8099 | H5 | PRP | 539 | 19.844 | 17.606 | 15.534 | 1.00 | 0.00 |
| H      |      |    |     |     |        |        |        |      |      |
| HETATM | 8100 | C3 | PRP | 539 | 18.182 | 17.366 | 17.104 | 1.00 | 0.00 |
| C      |      |    |     |     |        |        |        |      |      |
| HETATM | 8101 | H6 | PRP | 539 | 19.071 | 17.411 | 17.733 | 1.00 | 0.00 |
| H      |      |    |     |     |        |        |        |      |      |
| HETATM | 8102 | H7 | PRP | 539 | 17.937 | 18.406 | 16.891 | 1.00 | 0.00 |
| H      |      |    |     |     |        |        |        |      |      |
| HETATM | 8103 | H8 | PRP | 539 | 17.406 | 16.921 | 17.728 | 1.00 | 0.00 |
| H      |      |    |     |     |        |        |        |      |      |
| HETATM | 8104 | O1 | PRP | 540 | 37.321 | 56.337 | 11.896 | 1.00 | 0.00 |
| O      |      |    |     |     |        |        |        |      |      |
| HETATM | 8105 | H1 | PRP | 540 | 37.219 | 57.078 | 11.294 | 1.00 | 0.00 |
| H      |      |    |     |     |        |        |        |      |      |
| HETATM | 8106 | C1 | PRP | 540 | 37.337 | 56.791 | 13.297 | 1.00 | 0.00 |
| C      |      |    |     |     |        |        |        |      |      |
| HETATM | 8107 | H2 | PRP | 540 | 37.001 | 56.014 | 13.984 | 1.00 | 0.00 |
| H      |      |    |     |     |        |        |        |      |      |
| HETATM | 8108 | H3 | PRP | 540 | 38.344 | 57.008 | 13.653 | 1.00 | 0.00 |
| H      |      |    |     |     |        |        |        |      |      |
| HETATM | 8109 | C2 | PRP | 540 | 36.495 | 58.052 | 13.443 | 1.00 | 0.00 |
| C      |      |    |     |     |        |        |        |      |      |
| HETATM | 8110 | H4 | PRP | 540 | 35.468 | 57.900 | 13.111 | 1.00 | 0.00 |
| H      |      |    |     |     |        |        |        |      |      |
| HETATM | 8111 | O2 | PRP | 540 | 37.104 | 59.110 | 12.661 | 1.00 | 0.00 |
| O      |      |    |     |     |        |        |        |      |      |
| HETATM | 8112 | H5 | PRP | 540 | 38.050 | 59.122 | 12.823 | 1.00 | 0.00 |
| H      |      |    |     |     |        |        |        |      |      |
| HETATM | 8113 | C3 | PRP | 540 | 36.213 | 58.552 | 14.949 | 1.00 | 0.00 |
| C      |      |    |     |     |        |        |        |      |      |
| HETATM | 8114 | H6 | PRP | 540 | 36.297 | 57.702 | 15.626 | 1.00 | 0.00 |
| H      |      |    |     |     |        |        |        |      |      |
| HETATM | 8115 | H7 | PRP | 540 | 36.875 | 59.381 | 15.198 | 1.00 | 0.00 |
| H      |      |    |     |     |        |        |        |      |      |
| HETATM | 8116 | H8 | PRP | 540 | 35.158 | 58.827 | 14.938 | 1.00 | 0.00 |
| H      |      |    |     |     |        |        |        |      |      |
| HETATM | 8117 | O1 | PRP | 541 | 16.478 | 12.884 | 14.740 | 1.00 | 0.00 |
| O      |      |    |     |     |        |        |        |      |      |
| HETATM | 8118 | H1 | PRP | 541 | 17.193 | 13.492 | 14.941 | 1.00 | 0.00 |
| H      |      |    |     |     |        |        |        |      |      |
| HETATM | 8119 | C1 | PRP | 541 | 15.264 | 13.522 | 14.770 | 1.00 | 0.00 |
| C      |      |    |     |     |        |        |        |      |      |

|        |      |    |     |     |        |        |        |      |      |
|--------|------|----|-----|-----|--------|--------|--------|------|------|
| HETATM | 8120 | H2 | PRP | 541 | 15.480 | 14.512 | 14.370 | 1.00 | 0.00 |
| H      |      |    |     |     |        |        |        |      |      |
| HETATM | 8121 | H3 | PRP | 541 | 14.615 | 12.934 | 14.121 | 1.00 | 0.00 |
| H      |      |    |     |     |        |        |        |      |      |
| HETATM | 8122 | C2 | PRP | 541 | 14.538 | 13.686 | 16.107 | 1.00 | 0.00 |
| C      |      |    |     |     |        |        |        |      |      |
| HETATM | 8123 | H4 | PRP | 541 | 15.306 | 13.477 | 16.852 | 1.00 | 0.00 |
| H      |      |    |     |     |        |        |        |      |      |
| HETATM | 8124 | O2 | PRP | 541 | 13.529 | 12.749 | 16.239 | 1.00 | 0.00 |
| O      |      |    |     |     |        |        |        |      |      |
| HETATM | 8125 | H5 | PRP | 541 | 13.913 | 12.035 | 16.755 | 1.00 | 0.00 |
| H      |      |    |     |     |        |        |        |      |      |
| HETATM | 8126 | C3 | PRP | 541 | 14.027 | 15.080 | 16.348 | 1.00 | 0.00 |
| C      |      |    |     |     |        |        |        |      |      |
| HETATM | 8127 | H6 | PRP | 541 | 13.051 | 15.263 | 15.898 | 1.00 | 0.00 |
| H      |      |    |     |     |        |        |        |      |      |
| HETATM | 8128 | H7 | PRP | 541 | 13.905 | 15.113 | 17.431 | 1.00 | 0.00 |
| H      |      |    |     |     |        |        |        |      |      |
| HETATM | 8129 | H8 | PRP | 541 | 14.840 | 15.748 | 16.065 | 1.00 | 0.00 |
| H      |      |    |     |     |        |        |        |      |      |
| HETATM | 8130 | O1 | PRP | 542 | 16.404 | 1.780  | 15.178 | 1.00 | 0.00 |
| O      |      |    |     |     |        |        |        |      |      |
| HETATM | 8131 | H1 | PRP | 542 | 16.150 | 1.226  | 14.437 | 1.00 | 0.00 |
| H      |      |    |     |     |        |        |        |      |      |
| HETATM | 8132 | C1 | PRP | 542 | 17.787 | 1.634  | 15.508 | 1.00 | 0.00 |
| C      |      |    |     |     |        |        |        |      |      |
| HETATM | 8133 | H2 | PRP | 542 | 18.354 | 2.364  | 14.930 | 1.00 | 0.00 |
| H      |      |    |     |     |        |        |        |      |      |
| HETATM | 8134 | H3 | PRP | 542 | 17.978 | 1.856  | 16.558 | 1.00 | 0.00 |
| H      |      |    |     |     |        |        |        |      |      |
| HETATM | 8135 | C2 | PRP | 542 | 18.254 | 0.228  | 15.208 | 1.00 | 0.00 |
| C      |      |    |     |     |        |        |        |      |      |
| HETATM | 8136 | H4 | PRP | 542 | 19.304 | 0.213  | 15.502 | 1.00 | 0.00 |
| H      |      |    |     |     |        |        |        |      |      |
| HETATM | 8137 | O2 | PRP | 542 | 18.155 | -0.094 | 13.777 | 1.00 | 0.00 |
| O      |      |    |     |     |        |        |        |      |      |
| HETATM | 8138 | H5 | PRP | 542 | 18.337 | -1.031 | 13.682 | 1.00 | 0.00 |
| H      |      |    |     |     |        |        |        |      |      |
| HETATM | 8139 | C3 | PRP | 542 | 17.484 | -0.893 | 16.106 | 1.00 | 0.00 |
| C      |      |    |     |     |        |        |        |      |      |
| HETATM | 8140 | H6 | PRP | 542 | 17.670 | -0.692 | 17.161 | 1.00 | 0.00 |
| H      |      |    |     |     |        |        |        |      |      |
| HETATM | 8141 | H7 | PRP | 542 | 16.421 | -0.708 | 15.947 | 1.00 | 0.00 |
| H      |      |    |     |     |        |        |        |      |      |
| HETATM | 8142 | H8 | PRP | 542 | 17.871 | -1.873 | 15.830 | 1.00 | 0.00 |
| H      |      |    |     |     |        |        |        |      |      |
| HETATM | 8143 | O1 | PRP | 543 | 29.480 | 33.275 | 17.340 | 1.00 | 0.00 |
| O      |      |    |     |     |        |        |        |      |      |
| HETATM | 8144 | H1 | PRP | 543 | 29.571 | 32.992 | 18.253 | 1.00 | 0.00 |
| H      |      |    |     |     |        |        |        |      |      |
| HETATM | 8145 | C1 | PRP | 543 | 28.114 | 33.241 | 17.022 | 1.00 | 0.00 |
| C      |      |    |     |     |        |        |        |      |      |
| HETATM | 8146 | H2 | PRP | 543 | 27.593 | 33.921 | 17.695 | 1.00 | 0.00 |
| H      |      |    |     |     |        |        |        |      |      |
| HETATM | 8147 | H3 | PRP | 543 | 27.869 | 33.555 | 16.007 | 1.00 | 0.00 |
| H      |      |    |     |     |        |        |        |      |      |

|        |      |    |     |     |        |        |        |      |      |
|--------|------|----|-----|-----|--------|--------|--------|------|------|
| HETATM | 8148 | C2 | PRP | 543 | 27.539 | 31.839 | 17.137 | 1.00 | 0.00 |
| C      |      |    |     |     |        |        |        |      |      |
| HETATM | 8149 | H4 | PRP | 543 | 26.468 | 32.023 | 17.045 | 1.00 | 0.00 |
| H      |      |    |     |     |        |        |        |      |      |
| HETATM | 8150 | O2 | PRP | 543 | 27.849 | 31.249 | 18.403 | 1.00 | 0.00 |
| O      |      |    |     |     |        |        |        |      |      |
| HETATM | 8151 | H5 | PRP | 543 | 27.466 | 30.368 | 18.425 | 1.00 | 0.00 |
| H      |      |    |     |     |        |        |        |      |      |
| HETATM | 8152 | C3 | PRP | 543 | 27.984 | 30.880 | 16.062 | 1.00 | 0.00 |
| C      |      |    |     |     |        |        |        |      |      |
| HETATM | 8153 | H6 | PRP | 543 | 27.762 | 29.828 | 16.241 | 1.00 | 0.00 |
| H      |      |    |     |     |        |        |        |      |      |
| HETATM | 8154 | H7 | PRP | 543 | 27.590 | 31.103 | 15.071 | 1.00 | 0.00 |
| H      |      |    |     |     |        |        |        |      |      |
| HETATM | 8155 | H8 | PRP | 543 | 29.073 | 30.944 | 16.059 | 1.00 | 0.00 |
| H      |      |    |     |     |        |        |        |      |      |
| HETATM | 8156 | O1 | PRP | 544 | 30.212 | 31.837 | 19.776 | 1.00 | 0.00 |
| O      |      |    |     |     |        |        |        |      |      |
| HETATM | 8157 | H1 | PRP | 544 | 29.522 | 31.320 | 19.353 | 1.00 | 0.00 |
| H      |      |    |     |     |        |        |        |      |      |
| HETATM | 8158 | C1 | PRP | 544 | 31.442 | 31.214 | 19.371 | 1.00 | 0.00 |
| C      |      |    |     |     |        |        |        |      |      |
| HETATM | 8159 | H2 | PRP | 544 | 32.151 | 32.028 | 19.223 | 1.00 | 0.00 |
| H      |      |    |     |     |        |        |        |      |      |
| HETATM | 8160 | H3 | PRP | 544 | 31.717 | 30.420 | 20.067 | 1.00 | 0.00 |
| H      |      |    |     |     |        |        |        |      |      |
| HETATM | 8161 | C2 | PRP | 544 | 31.200 | 30.437 | 18.026 | 1.00 | 0.00 |
| C      |      |    |     |     |        |        |        |      |      |
| HETATM | 8162 | H4 | PRP | 544 | 30.818 | 31.079 | 17.233 | 1.00 | 0.00 |
| H      |      |    |     |     |        |        |        |      |      |
| HETATM | 8163 | O2 | PRP | 544 | 30.212 | 29.436 | 18.228 | 1.00 | 0.00 |
| O      |      |    |     |     |        |        |        |      |      |
| HETATM | 8164 | H5 | PRP | 544 | 30.786 | 28.722 | 18.514 | 1.00 | 0.00 |
| H      |      |    |     |     |        |        |        |      |      |
| HETATM | 8165 | C3 | PRP | 544 | 32.459 | 29.824 | 17.462 | 1.00 | 0.00 |
| C      |      |    |     |     |        |        |        |      |      |
| HETATM | 8166 | H6 | PRP | 544 | 32.232 | 28.933 | 16.878 | 1.00 | 0.00 |
| H      |      |    |     |     |        |        |        |      |      |
| HETATM | 8167 | H7 | PRP | 544 | 32.939 | 30.485 | 16.741 | 1.00 | 0.00 |
| H      |      |    |     |     |        |        |        |      |      |
| HETATM | 8168 | H8 | PRP | 544 | 33.073 | 29.561 | 18.324 | 1.00 | 0.00 |
| H      |      |    |     |     |        |        |        |      |      |
| HETATM | 8169 | O1 | PRP | 545 | 2.856  | 19.817 | 24.240 | 1.00 | 0.00 |
| O      |      |    |     |     |        |        |        |      |      |
| HETATM | 8170 | H1 | PRP | 545 | 3.346  | 19.043 | 23.953 | 1.00 | 0.00 |
| H      |      |    |     |     |        |        |        |      |      |
| HETATM | 8171 | C1 | PRP | 545 | 2.199  | 20.401 | 23.128 | 1.00 | 0.00 |
| C      |      |    |     |     |        |        |        |      |      |
| HETATM | 8172 | H2 | PRP | 545 | 1.696  | 19.666 | 22.499 | 1.00 | 0.00 |
| H      |      |    |     |     |        |        |        |      |      |
| HETATM | 8173 | H3 | PRP | 545 | 1.330  | 20.973 | 23.451 | 1.00 | 0.00 |
| H      |      |    |     |     |        |        |        |      |      |
| HETATM | 8174 | C2 | PRP | 545 | 3.220  | 21.248 | 22.337 | 1.00 | 0.00 |
| C      |      |    |     |     |        |        |        |      |      |
| HETATM | 8175 | H4 | PRP | 545 | 4.058  | 20.603 | 22.073 | 1.00 | 0.00 |
| H      |      |    |     |     |        |        |        |      |      |

|        |      |    |     |     |        |        |        |      |      |
|--------|------|----|-----|-----|--------|--------|--------|------|------|
| HETATM | 8176 | O2 | PRP | 545 | 3.673  | 22.337 | 23.122 | 1.00 | 0.00 |
| O      |      |    |     |     |        |        |        |      |      |
| HETATM | 8177 | H5 | PRP | 545 | 4.088  | 21.984 | 23.912 | 1.00 | 0.00 |
| H      |      |    |     |     |        |        |        |      |      |
| HETATM | 8178 | C3 | PRP | 545 | 2.617  | 21.832 | 21.074 | 1.00 | 0.00 |
| C      |      |    |     |     |        |        |        |      |      |
| HETATM | 8179 | H6 | PRP | 545 | 2.062  | 21.042 | 20.569 | 1.00 | 0.00 |
| H      |      |    |     |     |        |        |        |      |      |
| HETATM | 8180 | H7 | PRP | 545 | 1.885  | 22.578 | 21.382 | 1.00 | 0.00 |
| H      |      |    |     |     |        |        |        |      |      |
| HETATM | 8181 | H8 | PRP | 545 | 3.462  | 22.207 | 20.496 | 1.00 | 0.00 |
| H      |      |    |     |     |        |        |        |      |      |
| HETATM | 8182 | O1 | PRP | 546 | 4.482  | 17.516 | 23.196 | 1.00 | 0.00 |
| O      |      |    |     |     |        |        |        |      |      |
| HETATM | 8183 | H1 | PRP | 546 | 4.402  | 16.898 | 23.926 | 1.00 | 0.00 |
| H      |      |    |     |     |        |        |        |      |      |
| HETATM | 8184 | C1 | PRP | 546 | 5.010  | 16.834 | 22.068 | 1.00 | 0.00 |
| C      |      |    |     |     |        |        |        |      |      |
| HETATM | 8185 | H2 | PRP | 546 | 4.333  | 16.055 | 21.716 | 1.00 | 0.00 |
| H      |      |    |     |     |        |        |        |      |      |
| HETATM | 8186 | H3 | PRP | 546 | 5.183  | 17.655 | 21.373 | 1.00 | 0.00 |
| H      |      |    |     |     |        |        |        |      |      |
| HETATM | 8187 | C2 | PRP | 546 | 6.388  | 16.196 | 22.424 | 1.00 | 0.00 |
| C      |      |    |     |     |        |        |        |      |      |
| HETATM | 8188 | H4 | PRP | 546 | 6.658  | 15.705 | 21.489 | 1.00 | 0.00 |
| H      |      |    |     |     |        |        |        |      |      |
| HETATM | 8189 | O2 | PRP | 546 | 6.384  | 15.141 | 23.363 | 1.00 | 0.00 |
| O      |      |    |     |     |        |        |        |      |      |
| HETATM | 8190 | H5 | PRP | 546 | 5.727  | 15.278 | 24.049 | 1.00 | 0.00 |
| H      |      |    |     |     |        |        |        |      |      |
| HETATM | 8191 | C3 | PRP | 546 | 7.381  | 17.189 | 22.946 | 1.00 | 0.00 |
| C      |      |    |     |     |        |        |        |      |      |
| HETATM | 8192 | H6 | PRP | 546 | 7.123  | 17.592 | 23.925 | 1.00 | 0.00 |
| H      |      |    |     |     |        |        |        |      |      |
| HETATM | 8193 | H7 | PRP | 546 | 8.319  | 16.663 | 23.124 | 1.00 | 0.00 |
| H      |      |    |     |     |        |        |        |      |      |
| HETATM | 8194 | H8 | PRP | 546 | 7.576  | 18.035 | 22.286 | 1.00 | 0.00 |
| H      |      |    |     |     |        |        |        |      |      |
| HETATM | 8195 | O1 | PRP | 547 | -3.233 | 22.211 | 25.463 | 1.00 | 0.00 |
| O      |      |    |     |     |        |        |        |      |      |
| HETATM | 8196 | H1 | PRP | 547 | -2.918 | 21.377 | 25.819 | 1.00 | 0.00 |
| H      |      |    |     |     |        |        |        |      |      |
| HETATM | 8197 | C1 | PRP | 547 | -4.128 | 22.864 | 26.223 | 1.00 | 0.00 |
| C      |      |    |     |     |        |        |        |      |      |
| HETATM | 8198 | H2 | PRP | 547 | -3.601 | 23.336 | 27.052 | 1.00 | 0.00 |
| H      |      |    |     |     |        |        |        |      |      |
| HETATM | 8199 | H3 | PRP | 547 | -4.579 | 23.771 | 25.819 | 1.00 | 0.00 |
| H      |      |    |     |     |        |        |        |      |      |
| HETATM | 8200 | C2 | PRP | 547 | -5.247 | 21.886 | 26.752 | 1.00 | 0.00 |
| C      |      |    |     |     |        |        |        |      |      |
| HETATM | 8201 | H4 | PRP | 547 | -5.877 | 22.323 | 27.526 | 1.00 | 0.00 |
| H      |      |    |     |     |        |        |        |      |      |
| HETATM | 8202 | O2 | PRP | 547 | -4.610 | 20.705 | 27.315 | 1.00 | 0.00 |
| O      |      |    |     |     |        |        |        |      |      |
| HETATM | 8203 | H5 | PRP | 547 | -5.263 | 20.439 | 27.966 | 1.00 | 0.00 |
| H      |      |    |     |     |        |        |        |      |      |



|        |      |    |     |     |        |        |        |      |      |
|--------|------|----|-----|-----|--------|--------|--------|------|------|
| HETATM | 8204 | C3 | PRP | 547 | -6.165 | 21.459 | 25.567 | 1.00 | 0.00 |
| C      |      |    |     |     |        |        |        |      |      |
| HETATM | 8205 | H6 | PRP | 547 | -6.607 | 22.332 | 25.087 | 1.00 | 0.00 |
| H      |      |    |     |     |        |        |        |      |      |
| HETATM | 8206 | H7 | PRP | 547 | -5.534 | 20.871 | 24.900 | 1.00 | 0.00 |
| H      |      |    |     |     |        |        |        |      |      |
| HETATM | 8207 | H8 | PRP | 547 | -7.037 | 20.917 | 25.932 | 1.00 | 0.00 |
| H      |      |    |     |     |        |        |        |      |      |
| HETATM | 8208 | O1 | PRP | 548 | 14.279 | 33.634 | 24.380 | 1.00 | 0.00 |
| O      |      |    |     |     |        |        |        |      |      |
| HETATM | 8209 | H1 | PRP | 548 | 15.071 | 33.117 | 24.221 | 1.00 | 0.00 |
| H      |      |    |     |     |        |        |        |      |      |
| HETATM | 8210 | C1 | PRP | 548 | 14.644 | 34.704 | 25.281 | 1.00 | 0.00 |
| C      |      |    |     |     |        |        |        |      |      |
| HETATM | 8211 | H2 | PRP | 548 | 15.021 | 34.280 | 26.212 | 1.00 | 0.00 |
| H      |      |    |     |     |        |        |        |      |      |
| HETATM | 8212 | H3 | PRP | 548 | 15.386 | 35.262 | 24.709 | 1.00 | 0.00 |
| H      |      |    |     |     |        |        |        |      |      |
| HETATM | 8213 | C2 | PRP | 548 | 13.478 | 35.606 | 25.609 | 1.00 | 0.00 |
| C      |      |    |     |     |        |        |        |      |      |
| HETATM | 8214 | H4 | PRP | 548 | 12.580 | 35.089 | 25.946 | 1.00 | 0.00 |
| H      |      |    |     |     |        |        |        |      |      |
| HETATM | 8215 | O2 | PRP | 548 | 13.277 | 36.408 | 24.413 | 1.00 | 0.00 |
| O      |      |    |     |     |        |        |        |      |      |
| HETATM | 8216 | H5 | PRP | 548 | 13.078 | 35.808 | 23.690 | 1.00 | 0.00 |
| H      |      |    |     |     |        |        |        |      |      |
| HETATM | 8217 | C3 | PRP | 548 | 13.881 | 36.564 | 26.652 | 1.00 | 0.00 |
| C      |      |    |     |     |        |        |        |      |      |
| HETATM | 8218 | H6 | PRP | 548 | 12.944 | 37.067 | 26.888 | 1.00 | 0.00 |
| H      |      |    |     |     |        |        |        |      |      |
| HETATM | 8219 | H7 | PRP | 548 | 14.213 | 36.052 | 27.555 | 1.00 | 0.00 |
| H      |      |    |     |     |        |        |        |      |      |
| HETATM | 8220 | H8 | PRP | 548 | 14.737 | 37.103 | 26.243 | 1.00 | 0.00 |
| H      |      |    |     |     |        |        |        |      |      |
| HETATM | 8221 | O1 | PRP | 549 | 2.798  | 36.535 | 41.530 | 1.00 | 0.00 |
| O      |      |    |     |     |        |        |        |      |      |
| HETATM | 8222 | H1 | PRP | 549 | 2.418  | 35.792 | 41.055 | 1.00 | 0.00 |
| H      |      |    |     |     |        |        |        |      |      |
| HETATM | 8223 | C1 | PRP | 549 | 4.141  | 36.064 | 41.805 | 1.00 | 0.00 |
| C      |      |    |     |     |        |        |        |      |      |
| HETATM | 8224 | H2 | PRP | 549 | 4.287  | 35.465 | 42.704 | 1.00 | 0.00 |
| H      |      |    |     |     |        |        |        |      |      |
| HETATM | 8225 | H3 | PRP | 549 | 4.390  | 35.506 | 40.903 | 1.00 | 0.00 |
| H      |      |    |     |     |        |        |        |      |      |
| HETATM | 8226 | C2 | PRP | 549 | 5.112  | 37.298 | 41.976 | 1.00 | 0.00 |
| C      |      |    |     |     |        |        |        |      |      |
| HETATM | 8227 | H4 | PRP | 549 | 4.534  | 38.069 | 42.486 | 1.00 | 0.00 |
| H      |      |    |     |     |        |        |        |      |      |
| HETATM | 8228 | O2 | PRP | 549 | 5.339  | 37.847 | 40.744 | 1.00 | 0.00 |
| O      |      |    |     |     |        |        |        |      |      |
| HETATM | 8229 | H5 | PRP | 549 | 6.002  | 38.521 | 40.911 | 1.00 | 0.00 |
| H      |      |    |     |     |        |        |        |      |      |
| HETATM | 8230 | C3 | PRP | 549 | 6.441  | 36.962 | 42.661 | 1.00 | 0.00 |
| C      |      |    |     |     |        |        |        |      |      |
| HETATM | 8231 | H6 | PRP | 549 | 7.026  | 37.881 | 42.612 | 1.00 | 0.00 |
| H      |      |    |     |     |        |        |        |      |      |

|        |      |    |     |     |        |        |        |      |      |
|--------|------|----|-----|-----|--------|--------|--------|------|------|
| HETATM | 8232 | H7 | PRP | 549 | 6.428  | 36.746 | 43.730 | 1.00 | 0.00 |
| H      |      |    |     |     |        |        |        |      |      |
| HETATM | 8233 | H8 | PRP | 549 | 6.994  | 36.118 | 42.248 | 1.00 | 0.00 |
| H      |      |    |     |     |        |        |        |      |      |
| HETATM | 8234 | O1 | PRP | 550 | 13.909 | 42.387 | 14.553 | 1.00 | 0.00 |
| O      |      |    |     |     |        |        |        |      |      |
| HETATM | 8235 | H1 | PRP | 550 | 13.354 | 41.832 | 13.999 | 1.00 | 0.00 |
| H      |      |    |     |     |        |        |        |      |      |
| HETATM | 8236 | C1 | PRP | 550 | 14.580 | 43.362 | 13.687 | 1.00 | 0.00 |
| C      |      |    |     |     |        |        |        |      |      |
| HETATM | 8237 | H2 | PRP | 550 | 13.846 | 43.998 | 13.192 | 1.00 | 0.00 |
| H      |      |    |     |     |        |        |        |      |      |
| HETATM | 8238 | H3 | PRP | 550 | 15.146 | 44.023 | 14.343 | 1.00 | 0.00 |
| H      |      |    |     |     |        |        |        |      |      |
| HETATM | 8239 | C2 | PRP | 550 | 15.446 | 42.667 | 12.615 | 1.00 | 0.00 |
| C      |      |    |     |     |        |        |        |      |      |
| HETATM | 8240 | H4 | PRP | 550 | 15.835 | 43.458 | 11.974 | 1.00 | 0.00 |
| H      |      |    |     |     |        |        |        |      |      |
| HETATM | 8241 | O2 | PRP | 550 | 14.725 | 41.738 | 11.826 | 1.00 | 0.00 |
| O      |      |    |     |     |        |        |        |      |      |
| HETATM | 8242 | H5 | PRP | 550 | 14.529 | 42.236 | 11.029 | 1.00 | 0.00 |
| H      |      |    |     |     |        |        |        |      |      |
| HETATM | 8243 | C3 | PRP | 550 | 16.559 | 41.932 | 13.421 | 1.00 | 0.00 |
| C      |      |    |     |     |        |        |        |      |      |
| HETATM | 8244 | H6 | PRP | 550 | 16.140 | 41.133 | 14.033 | 1.00 | 0.00 |
| H      |      |    |     |     |        |        |        |      |      |
| HETATM | 8245 | H7 | PRP | 550 | 17.395 | 41.501 | 12.870 | 1.00 | 0.00 |
| H      |      |    |     |     |        |        |        |      |      |
| HETATM | 8246 | H8 | PRP | 550 | 17.009 | 42.639 | 14.118 | 1.00 | 0.00 |
| H      |      |    |     |     |        |        |        |      |      |
| HETATM | 8247 | O1 | PRP | 551 | 24.252 | 48.380 | 15.656 | 1.00 | 0.00 |
| O      |      |    |     |     |        |        |        |      |      |
| HETATM | 8248 | H1 | PRP | 551 | 24.944 | 49.001 | 15.896 | 1.00 | 0.00 |
| H      |      |    |     |     |        |        |        |      |      |
| HETATM | 8249 | C1 | PRP | 551 | 23.758 | 47.591 | 16.757 | 1.00 | 0.00 |
| C      |      |    |     |     |        |        |        |      |      |
| HETATM | 8250 | H2 | PRP | 551 | 22.710 | 47.796 | 16.973 | 1.00 | 0.00 |
| H      |      |    |     |     |        |        |        |      |      |
| HETATM | 8251 | H3 | PRP | 551 | 23.841 | 46.538 | 16.485 | 1.00 | 0.00 |
| H      |      |    |     |     |        |        |        |      |      |
| HETATM | 8252 | C2 | PRP | 551 | 24.676 | 47.834 | 17.981 | 1.00 | 0.00 |
| C      |      |    |     |     |        |        |        |      |      |
| HETATM | 8253 | H4 | PRP | 551 | 24.251 | 47.149 | 18.714 | 1.00 | 0.00 |
| H      |      |    |     |     |        |        |        |      |      |
| HETATM | 8254 | O2 | PRP | 551 | 24.642 | 49.188 | 18.386 | 1.00 | 0.00 |
| O      |      |    |     |     |        |        |        |      |      |
| HETATM | 8255 | H5 | PRP | 551 | 23.820 | 49.321 | 18.864 | 1.00 | 0.00 |
| H      |      |    |     |     |        |        |        |      |      |
| HETATM | 8256 | C3 | PRP | 551 | 26.161 | 47.559 | 17.663 | 1.00 | 0.00 |
| C      |      |    |     |     |        |        |        |      |      |
| HETATM | 8257 | H6 | PRP | 551 | 26.320 | 46.590 | 17.189 | 1.00 | 0.00 |
| H      |      |    |     |     |        |        |        |      |      |
| HETATM | 8258 | H7 | PRP | 551 | 26.632 | 48.328 | 17.052 | 1.00 | 0.00 |
| H      |      |    |     |     |        |        |        |      |      |
| HETATM | 8259 | H8 | PRP | 551 | 26.678 | 47.516 | 18.622 | 1.00 | 0.00 |
| H      |      |    |     |     |        |        |        |      |      |

|        |      |    |     |     |         |        |        |      |      |
|--------|------|----|-----|-----|---------|--------|--------|------|------|
| HETATM | 8260 | O1 | PRP | 552 | -14.168 | 13.236 | 16.404 | 1.00 | 0.00 |
| O      |      |    |     |     |         |        |        |      |      |
| HETATM | 8261 | H1 | PRP | 552 | -14.113 | 12.464 | 15.837 | 1.00 | 0.00 |
| H      |      |    |     |     |         |        |        |      |      |
| HETATM | 8262 | C1 | PRP | 552 | -13.830 | 12.984 | 17.710 | 1.00 | 0.00 |
| C      |      |    |     |     |         |        |        |      |      |
| HETATM | 8263 | H2 | PRP | 552 | -12.848 | 12.539 | 17.867 | 1.00 | 0.00 |
| H      |      |    |     |     |         |        |        |      |      |
| HETATM | 8264 | H3 | PRP | 552 | -13.846 | 13.964 | 18.188 | 1.00 | 0.00 |
| H      |      |    |     |     |         |        |        |      |      |
| HETATM | 8265 | C2 | PRP | 552 | -14.853 | 12.023 | 18.359 | 1.00 | 0.00 |
| C      |      |    |     |     |         |        |        |      |      |
| HETATM | 8266 | H4 | PRP | 552 | -14.492 | 11.744 | 19.349 | 1.00 | 0.00 |
| H      |      |    |     |     |         |        |        |      |      |
| HETATM | 8267 | O2 | PRP | 552 | -15.033 | 10.903 | 17.549 | 1.00 | 0.00 |
| O      |      |    |     |     |         |        |        |      |      |
| HETATM | 8268 | H5 | PRP | 552 | -15.441 | 11.218 | 16.739 | 1.00 | 0.00 |
| H      |      |    |     |     |         |        |        |      |      |
| HETATM | 8269 | C3 | PRP | 552 | -16.238 | 12.626 | 18.620 | 1.00 | 0.00 |
| C      |      |    |     |     |         |        |        |      |      |
| HETATM | 8270 | H6 | PRP | 552 | -16.442 | 12.754 | 19.683 | 1.00 | 0.00 |
| H      |      |    |     |     |         |        |        |      |      |
| HETATM | 8271 | H7 | PRP | 552 | -16.221 | 13.601 | 18.132 | 1.00 | 0.00 |
| H      |      |    |     |     |         |        |        |      |      |
| HETATM | 8272 | H8 | PRP | 552 | -17.098 | 12.046 | 18.285 | 1.00 | 0.00 |
| H      |      |    |     |     |         |        |        |      |      |
| HETATM | 8273 | O1 | PRP | 553 | 8.082   | 33.922 | 28.151 | 1.00 | 0.00 |
| O      |      |    |     |     |         |        |        |      |      |
| HETATM | 8274 | H1 | PRP | 553 | 7.498   | 33.381 | 27.614 | 1.00 | 0.00 |
| H      |      |    |     |     |         |        |        |      |      |
| HETATM | 8275 | C1 | PRP | 553 | 9.386   | 33.907 | 27.560 | 1.00 | 0.00 |
| C      |      |    |     |     |         |        |        |      |      |
| HETATM | 8276 | H2 | PRP | 553 | 9.523   | 32.998 | 26.974 | 1.00 | 0.00 |
| H      |      |    |     |     |         |        |        |      |      |
| HETATM | 8277 | H3 | PRP | 553 | 9.654   | 34.762 | 26.939 | 1.00 | 0.00 |
| H      |      |    |     |     |         |        |        |      |      |
| HETATM | 8278 | C2 | PRP | 553 | 10.283  | 33.810 | 28.835 | 1.00 | 0.00 |
| C      |      |    |     |     |         |        |        |      |      |
| HETATM | 8279 | H4 | PRP | 553 | 9.738   | 33.225 | 29.576 | 1.00 | 0.00 |
| H      |      |    |     |     |         |        |        |      |      |
| HETATM | 8280 | O2 | PRP | 553 | 10.615  | 35.087 | 29.359 | 1.00 | 0.00 |
| O      |      |    |     |     |         |        |        |      |      |
| HETATM | 8281 | H5 | PRP | 553 | 9.803   | 35.566 | 29.538 | 1.00 | 0.00 |
| H      |      |    |     |     |         |        |        |      |      |
| HETATM | 8282 | C3 | PRP | 553 | 11.620  | 33.099 | 28.480 | 1.00 | 0.00 |
| C      |      |    |     |     |         |        |        |      |      |
| HETATM | 8283 | H6 | PRP | 553 | 12.380  | 33.311 | 29.232 | 1.00 | 0.00 |
| H      |      |    |     |     |         |        |        |      |      |
| HETATM | 8284 | H7 | PRP | 553 | 11.505  | 32.022 | 28.354 | 1.00 | 0.00 |
| H      |      |    |     |     |         |        |        |      |      |
| HETATM | 8285 | H8 | PRP | 553 | 12.014  | 33.514 | 27.553 | 1.00 | 0.00 |
| H      |      |    |     |     |         |        |        |      |      |
| HETATM | 8286 | O1 | PRP | 554 | 4.605   | 25.236 | 23.673 | 1.00 | 0.00 |
| O      |      |    |     |     |         |        |        |      |      |
| HETATM | 8287 | H1 | PRP | 554 | 4.521   | 24.471 | 24.246 | 1.00 | 0.00 |
| H      |      |    |     |     |         |        |        |      |      |

|        |      |    |     |     |        |        |        |      |      |
|--------|------|----|-----|-----|--------|--------|--------|------|------|
| HETATM | 8288 | C1 | PRP | 554 | 4.789  | 26.313 | 24.571 | 1.00 | 0.00 |
| C      |      |    |     |     |        |        |        |      |      |
| HETATM | 8289 | H2 | PRP | 554 | 4.854  | 27.192 | 23.929 | 1.00 | 0.00 |
| H      |      |    |     |     |        |        |        |      |      |
| HETATM | 8290 | H3 | PRP | 554 | 4.083  | 26.381 | 25.399 | 1.00 | 0.00 |
| H      |      |    |     |     |        |        |        |      |      |
| HETATM | 8291 | C2 | PRP | 554 | 6.188  | 26.161 | 25.281 | 1.00 | 0.00 |
| C      |      |    |     |     |        |        |        |      |      |
| HETATM | 8292 | H4 | PRP | 554 | 6.874  | 25.734 | 24.548 | 1.00 | 0.00 |
| H      |      |    |     |     |        |        |        |      |      |
| HETATM | 8293 | O2 | PRP | 554 | 5.988  | 25.217 | 26.310 | 1.00 | 0.00 |
| O      |      |    |     |     |        |        |        |      |      |
| HETATM | 8294 | H5 | PRP | 554 | 5.132  | 24.802 | 26.182 | 1.00 | 0.00 |
| H      |      |    |     |     |        |        |        |      |      |
| HETATM | 8295 | C3 | PRP | 554 | 6.632  | 27.472 | 25.966 | 1.00 | 0.00 |
| C      |      |    |     |     |        |        |        |      |      |
| HETATM | 8296 | H6 | PRP | 554 | 7.629  | 27.462 | 26.406 | 1.00 | 0.00 |
| H      |      |    |     |     |        |        |        |      |      |
| HETATM | 8297 | H7 | PRP | 554 | 6.724  | 28.161 | 25.126 | 1.00 | 0.00 |
| H      |      |    |     |     |        |        |        |      |      |
| HETATM | 8298 | H8 | PRP | 554 | 5.869  | 27.637 | 26.727 | 1.00 | 0.00 |
| H      |      |    |     |     |        |        |        |      |      |
| HETATM | 8299 | O1 | PRP | 555 | 13.163 | 34.406 | 16.874 | 1.00 | 0.00 |
| O      |      |    |     |     |        |        |        |      |      |
| HETATM | 8300 | H1 | PRP | 555 | 13.160 | 34.822 | 17.738 | 1.00 | 0.00 |
| H      |      |    |     |     |        |        |        |      |      |
| HETATM | 8301 | C1 | PRP | 555 | 12.683 | 33.072 | 16.928 | 1.00 | 0.00 |
| C      |      |    |     |     |        |        |        |      |      |
| HETATM | 8302 | H2 | PRP | 555 | 12.918 | 32.688 | 15.936 | 1.00 | 0.00 |
| H      |      |    |     |     |        |        |        |      |      |
| HETATM | 8303 | H3 | PRP | 555 | 13.393 | 32.578 | 17.591 | 1.00 | 0.00 |
| H      |      |    |     |     |        |        |        |      |      |
| HETATM | 8304 | C2 | PRP | 555 | 11.209 | 32.984 | 17.392 | 1.00 | 0.00 |
| C      |      |    |     |     |        |        |        |      |      |
| HETATM | 8305 | H4 | PRP | 555 | 10.485 | 33.487 | 16.750 | 1.00 | 0.00 |
| H      |      |    |     |     |        |        |        |      |      |
| HETATM | 8306 | O2 | PRP | 555 | 10.977 | 33.360 | 18.698 | 1.00 | 0.00 |
| O      |      |    |     |     |        |        |        |      |      |
| HETATM | 8307 | H5 | PRP | 555 | 11.788 | 33.198 | 19.185 | 1.00 | 0.00 |
| H      |      |    |     |     |        |        |        |      |      |
| HETATM | 8308 | C3 | PRP | 555 | 10.798 | 31.560 | 17.418 | 1.00 | 0.00 |
| C      |      |    |     |     |        |        |        |      |      |
| HETATM | 8309 | H6 | PRP | 555 | 9.731  | 31.359 | 17.510 | 1.00 | 0.00 |
| H      |      |    |     |     |        |        |        |      |      |
| HETATM | 8310 | H7 | PRP | 555 | 11.309 | 30.914 | 16.704 | 1.00 | 0.00 |
| H      |      |    |     |     |        |        |        |      |      |
| HETATM | 8311 | H8 | PRP | 555 | 11.147 | 31.061 | 18.322 | 1.00 | 0.00 |
| H      |      |    |     |     |        |        |        |      |      |
| HETATM | 8312 | O1 | PRP | 556 | 15.226 | 53.637 | 10.364 | 1.00 | 0.00 |
| O      |      |    |     |     |        |        |        |      |      |
| HETATM | 8313 | H1 | PRP | 556 | 14.891 | 53.955 | 11.206 | 1.00 | 0.00 |
| H      |      |    |     |     |        |        |        |      |      |
| HETATM | 8314 | C1 | PRP | 556 | 14.670 | 54.466 | 9.320  | 1.00 | 0.00 |
| C      |      |    |     |     |        |        |        |      |      |
| HETATM | 8315 | H2 | PRP | 556 | 13.580 | 54.479 | 9.327  | 1.00 | 0.00 |
| H      |      |    |     |     |        |        |        |      |      |

|        |      |    |     |     |        |        |        |      |      |
|--------|------|----|-----|-----|--------|--------|--------|------|------|
| HETATM | 8316 | H3 | PRP | 556 | 15.083 | 55.473 | 9.390  | 1.00 | 0.00 |
| H      |      |    |     |     |        |        |        |      |      |
| HETATM | 8317 | C2 | PRP | 556 | 15.103 | 54.041 | 7.931  | 1.00 | 0.00 |
| C      |      |    |     |     |        |        |        |      |      |
| HETATM | 8318 | H4 | PRP | 556 | 15.065 | 52.955 | 7.854  | 1.00 | 0.00 |
| H      |      |    |     |     |        |        |        |      |      |
| HETATM | 8319 | O2 | PRP | 556 | 16.396 | 54.536 | 7.729  | 1.00 | 0.00 |
| O      |      |    |     |     |        |        |        |      |      |
| HETATM | 8320 | H5 | PRP | 556 | 17.043 | 54.073 | 8.266  | 1.00 | 0.00 |
| H      |      |    |     |     |        |        |        |      |      |
| HETATM | 8321 | C3 | PRP | 556 | 14.288 | 54.621 | 6.839  | 1.00 | 0.00 |
| C      |      |    |     |     |        |        |        |      |      |
| HETATM | 8322 | H6 | PRP | 556 | 14.245 | 55.707 | 6.918  | 1.00 | 0.00 |
| H      |      |    |     |     |        |        |        |      |      |
| HETATM | 8323 | H7 | PRP | 556 | 14.659 | 54.400 | 5.838  | 1.00 | 0.00 |
| H      |      |    |     |     |        |        |        |      |      |
| HETATM | 8324 | H8 | PRP | 556 | 13.293 | 54.184 | 6.919  | 1.00 | 0.00 |
| H      |      |    |     |     |        |        |        |      |      |
| HETATM | 8325 | O1 | PRP | 557 | 19.021 | 41.008 | 20.234 | 1.00 | 0.00 |
| O      |      |    |     |     |        |        |        |      |      |
| HETATM | 8326 | H1 | PRP | 557 | 18.431 | 41.599 | 19.761 | 1.00 | 0.00 |
| H      |      |    |     |     |        |        |        |      |      |
| HETATM | 8327 | C1 | PRP | 557 | 18.274 | 39.835 | 20.505 | 1.00 | 0.00 |
| C      |      |    |     |     |        |        |        |      |      |
| HETATM | 8328 | H2 | PRP | 557 | 17.462 | 40.080 | 21.190 | 1.00 | 0.00 |
| H      |      |    |     |     |        |        |        |      |      |
| HETATM | 8329 | H3 | PRP | 557 | 17.873 | 39.438 | 19.573 | 1.00 | 0.00 |
| H      |      |    |     |     |        |        |        |      |      |
| HETATM | 8330 | C2 | PRP | 557 | 19.067 | 38.792 | 21.337 | 1.00 | 0.00 |
| C      |      |    |     |     |        |        |        |      |      |
| HETATM | 8331 | H4 | PRP | 557 | 18.992 | 39.135 | 22.369 | 1.00 | 0.00 |
| H      |      |    |     |     |        |        |        |      |      |
| HETATM | 8332 | O2 | PRP | 557 | 20.413 | 38.743 | 20.996 | 1.00 | 0.00 |
| O      |      |    |     |     |        |        |        |      |      |
| HETATM | 8333 | H5 | PRP | 557 | 20.463 | 38.813 | 20.040 | 1.00 | 0.00 |
| H      |      |    |     |     |        |        |        |      |      |
| HETATM | 8334 | C3 | PRP | 557 | 18.602 | 37.322 | 21.315 | 1.00 | 0.00 |
| C      |      |    |     |     |        |        |        |      |      |
| HETATM | 8335 | H6 | PRP | 557 | 18.505 | 36.992 | 20.281 | 1.00 | 0.00 |
| H      |      |    |     |     |        |        |        |      |      |
| HETATM | 8336 | H7 | PRP | 557 | 19.354 | 36.746 | 21.855 | 1.00 | 0.00 |
| H      |      |    |     |     |        |        |        |      |      |
| HETATM | 8337 | H8 | PRP | 557 | 17.606 | 37.213 | 21.744 | 1.00 | 0.00 |
| H      |      |    |     |     |        |        |        |      |      |
| HETATM | 8338 | O1 | PRP | 558 | 0.944  | 15.845 | 18.550 | 1.00 | 0.00 |
| O      |      |    |     |     |        |        |        |      |      |
| HETATM | 8339 | H1 | PRP | 558 | 0.807  | 15.422 | 17.699 | 1.00 | 0.00 |
| H      |      |    |     |     |        |        |        |      |      |
| HETATM | 8340 | C1 | PRP | 558 | 1.798  | 16.952 | 18.222 | 1.00 | 0.00 |
| C      |      |    |     |     |        |        |        |      |      |
| HETATM | 8341 | H2 | PRP | 558 | 2.439  | 16.765 | 17.360 | 1.00 | 0.00 |
| H      |      |    |     |     |        |        |        |      |      |
| HETATM | 8342 | H3 | PRP | 558 | 1.167  | 17.798 | 17.948 | 1.00 | 0.00 |
| H      |      |    |     |     |        |        |        |      |      |
| HETATM | 8343 | C2 | PRP | 558 | 2.622  | 17.262 | 19.476 | 1.00 | 0.00 |
| C      |      |    |     |     |        |        |        |      |      |

|        |      |    |     |     |        |        |        |      |      |
|--------|------|----|-----|-----|--------|--------|--------|------|------|
| HETATM | 8344 | H4 | PRP | 558 | 2.992  | 18.286 | 19.438 | 1.00 | 0.00 |
| H      |      |    |     |     |        |        |        |      |      |
| HETATM | 8345 | O2 | PRP | 558 | 3.713  | 16.392 | 19.483 | 1.00 | 0.00 |
| O      |      |    |     |     |        |        |        |      |      |
| HETATM | 8346 | H5 | PRP | 558 | 3.368  | 15.520 | 19.278 | 1.00 | 0.00 |
| H      |      |    |     |     |        |        |        |      |      |
| HETATM | 8347 | C3 | PRP | 558 | 1.895  | 17.193 | 20.820 | 1.00 | 0.00 |
| C      |      |    |     |     |        |        |        |      |      |
| HETATM | 8348 | H6 | PRP | 558 | 1.842  | 16.258 | 21.377 | 1.00 | 0.00 |
| H      |      |    |     |     |        |        |        |      |      |
| HETATM | 8349 | H7 | PRP | 558 | 2.430  | 17.896 | 21.459 | 1.00 | 0.00 |
| H      |      |    |     |     |        |        |        |      |      |
| HETATM | 8350 | H8 | PRP | 558 | 0.873  | 17.570 | 20.773 | 1.00 | 0.00 |
| H      |      |    |     |     |        |        |        |      |      |
| HETATM | 8351 | O1 | PRP | 559 | 7.860  | 19.080 | 30.772 | 1.00 | 0.00 |
| O      |      |    |     |     |        |        |        |      |      |
| HETATM | 8352 | H1 | PRP | 559 | 8.798  | 19.048 | 30.975 | 1.00 | 0.00 |
| H      |      |    |     |     |        |        |        |      |      |
| HETATM | 8353 | C1 | PRP | 559 | 7.610  | 19.622 | 29.442 | 1.00 | 0.00 |
| C      |      |    |     |     |        |        |        |      |      |
| HETATM | 8354 | H2 | PRP | 559 | 6.538  | 19.515 | 29.275 | 1.00 | 0.00 |
| H      |      |    |     |     |        |        |        |      |      |
| HETATM | 8355 | H3 | PRP | 559 | 7.869  | 20.680 | 29.410 | 1.00 | 0.00 |
| H      |      |    |     |     |        |        |        |      |      |
| HETATM | 8356 | C2 | PRP | 559 | 8.423  | 18.907 | 28.364 | 1.00 | 0.00 |
| C      |      |    |     |     |        |        |        |      |      |
| HETATM | 8357 | H4 | PRP | 559 | 7.989  | 17.909 | 28.313 | 1.00 | 0.00 |
| H      |      |    |     |     |        |        |        |      |      |
| HETATM | 8358 | O2 | PRP | 559 | 9.785  | 18.876 | 28.635 | 1.00 | 0.00 |
| O      |      |    |     |     |        |        |        |      |      |
| HETATM | 8359 | H5 | PRP | 559 | 9.910  | 18.123 | 29.217 | 1.00 | 0.00 |
| H      |      |    |     |     |        |        |        |      |      |
| HETATM | 8360 | C3 | PRP | 559 | 8.185  | 19.491 | 26.945 | 1.00 | 0.00 |
| C      |      |    |     |     |        |        |        |      |      |
| HETATM | 8361 | H6 | PRP | 559 | 8.366  | 18.638 | 26.291 | 1.00 | 0.00 |
| H      |      |    |     |     |        |        |        |      |      |
| HETATM | 8362 | H7 | PRP | 559 | 7.127  | 19.733 | 26.855 | 1.00 | 0.00 |
| H      |      |    |     |     |        |        |        |      |      |
| HETATM | 8363 | H8 | PRP | 559 | 8.811  | 20.365 | 26.766 | 1.00 | 0.00 |
| H      |      |    |     |     |        |        |        |      |      |
| HETATM | 8364 | O1 | PRP | 560 | 25.205 | 36.678 | 23.071 | 1.00 | 0.00 |
| O      |      |    |     |     |        |        |        |      |      |
| HETATM | 8365 | H1 | PRP | 560 | 25.194 | 35.846 | 22.593 | 1.00 | 0.00 |
| H      |      |    |     |     |        |        |        |      |      |
| HETATM | 8366 | C1 | PRP | 560 | 23.874 | 37.188 | 23.141 | 1.00 | 0.00 |
| C      |      |    |     |     |        |        |        |      |      |
| HETATM | 8367 | H2 | PRP | 560 | 23.415 | 36.720 | 24.012 | 1.00 | 0.00 |
| H      |      |    |     |     |        |        |        |      |      |
| HETATM | 8368 | H3 | PRP | 560 | 23.887 | 38.238 | 23.433 | 1.00 | 0.00 |
| H      |      |    |     |     |        |        |        |      |      |
| HETATM | 8369 | C2 | PRP | 560 | 23.094 | 36.898 | 21.853 | 1.00 | 0.00 |
| C      |      |    |     |     |        |        |        |      |      |
| HETATM | 8370 | H4 | PRP | 560 | 22.026 | 37.062 | 22.001 | 1.00 | 0.00 |
| H      |      |    |     |     |        |        |        |      |      |
| HETATM | 8371 | O2 | PRP | 560 | 23.158 | 35.524 | 21.560 | 1.00 | 0.00 |
| O      |      |    |     |     |        |        |        |      |      |

|        |      |    |     |     |         |        |        |      |      |
|--------|------|----|-----|-----|---------|--------|--------|------|------|
| HETATM | 8372 | H5 | PRP | 560 | 22.971  | 34.915 | 22.278 | 1.00 | 0.00 |
| H      |      |    |     |     |         |        |        |      |      |
| HETATM | 8373 | C3 | PRP | 560 | 23.594  | 37.704 | 20.685 | 1.00 | 0.00 |
| C      |      |    |     |     |         |        |        |      |      |
| HETATM | 8374 | H6 | PRP | 560 | 22.942  | 37.526 | 19.830 | 1.00 | 0.00 |
| H      |      |    |     |     |         |        |        |      |      |
| HETATM | 8375 | H7 | PRP | 560 | 23.489  | 38.758 | 20.939 | 1.00 | 0.00 |
| H      |      |    |     |     |         |        |        |      |      |
| HETATM | 8376 | H8 | PRP | 560 | 24.636  | 37.544 | 20.408 | 1.00 | 0.00 |
| H      |      |    |     |     |         |        |        |      |      |
| HETATM | 8377 | O1 | PRP | 561 | -2.706  | 13.283 | 24.806 | 1.00 | 0.00 |
| O      |      |    |     |     |         |        |        |      |      |
| HETATM | 8378 | H1 | PRP | 561 | -3.557  | 13.559 | 25.154 | 1.00 | 0.00 |
| H      |      |    |     |     |         |        |        |      |      |
| HETATM | 8379 | C1 | PRP | 561 | -1.879  | 14.402 | 24.644 | 1.00 | 0.00 |
| C      |      |    |     |     |         |        |        |      |      |
| HETATM | 8380 | H2 | PRP | 561 | -2.405  | 15.197 | 24.115 | 1.00 | 0.00 |
| H      |      |    |     |     |         |        |        |      |      |
| HETATM | 8381 | H3 | PRP | 561 | -1.672  | 14.832 | 25.625 | 1.00 | 0.00 |
| H      |      |    |     |     |         |        |        |      |      |
| HETATM | 8382 | C2 | PRP | 561 | -0.585  | 14.045 | 23.839 | 1.00 | 0.00 |
| C      |      |    |     |     |         |        |        |      |      |
| HETATM | 8383 | H4 | PRP | 561 | -0.848  | 14.000 | 22.783 | 1.00 | 0.00 |
| H      |      |    |     |     |         |        |        |      |      |
| HETATM | 8384 | O2 | PRP | 561 | 0.189   | 13.008 | 24.296 | 1.00 | 0.00 |
| O      |      |    |     |     |         |        |        |      |      |
| HETATM | 8385 | H5 | PRP | 561 | -0.121  | 12.225 | 23.834 | 1.00 | 0.00 |
| H      |      |    |     |     |         |        |        |      |      |
| HETATM | 8386 | C3 | PRP | 561 | 0.225   | 15.329 | 23.973 | 1.00 | 0.00 |
| C      |      |    |     |     |         |        |        |      |      |
| HETATM | 8387 | H6 | PRP | 561 | -0.241  | 16.168 | 23.455 | 1.00 | 0.00 |
| H      |      |    |     |     |         |        |        |      |      |
| HETATM | 8388 | H7 | PRP | 561 | 0.482   | 15.529 | 25.013 | 1.00 | 0.00 |
| H      |      |    |     |     |         |        |        |      |      |
| HETATM | 8389 | H8 | PRP | 561 | 1.206   | 15.072 | 23.573 | 1.00 | 0.00 |
| H      |      |    |     |     |         |        |        |      |      |
| HETATM | 8390 | O1 | PRP | 562 | -10.998 | 24.406 | 11.991 | 1.00 | 0.00 |
| O      |      |    |     |     |         |        |        |      |      |
| HETATM | 8391 | H1 | PRP | 562 | -11.013 | 25.336 | 11.754 | 1.00 | 0.00 |
| H      |      |    |     |     |         |        |        |      |      |
| HETATM | 8392 | C1 | PRP | 562 | -10.362 | 23.701 | 11.011 | 1.00 | 0.00 |
| C      |      |    |     |     |         |        |        |      |      |
| HETATM | 8393 | H2 | PRP | 562 | -10.483 | 22.627 | 11.154 | 1.00 | 0.00 |
| H      |      |    |     |     |         |        |        |      |      |
| HETATM | 8394 | H3 | PRP | 562 | -10.787 | 24.009 | 10.055 | 1.00 | 0.00 |
| H      |      |    |     |     |         |        |        |      |      |
| HETATM | 8395 | C2 | PRP | 562 | -8.880  | 24.054 | 11.157 | 1.00 | 0.00 |
| C      |      |    |     |     |         |        |        |      |      |
| HETATM | 8396 | H4 | PRP | 562 | -8.552  | 23.945 | 12.191 | 1.00 | 0.00 |
| H      |      |    |     |     |         |        |        |      |      |
| HETATM | 8397 | O2 | PRP | 562 | -8.776  | 25.433 | 10.857 | 1.00 | 0.00 |
| O      |      |    |     |     |         |        |        |      |      |
| HETATM | 8398 | H5 | PRP | 562 | -8.276  | 25.906 | 11.526 | 1.00 | 0.00 |
| H      |      |    |     |     |         |        |        |      |      |
| HETATM | 8399 | C3 | PRP | 562 | -7.965  | 23.277 | 10.122 | 1.00 | 0.00 |
| C      |      |    |     |     |         |        |        |      |      |

|        |      |    |     |     |        |        |        |      |      |
|--------|------|----|-----|-----|--------|--------|--------|------|------|
| HETATM | 8400 | H6 | PRP | 562 | -8.000 | 22.210 | 10.342 | 1.00 | 0.00 |
| H      |      |    |     |     |        |        |        |      |      |
| HETATM | 8401 | H7 | PRP | 562 | -8.451 | 23.410 | 9.156  | 1.00 | 0.00 |
| H      |      |    |     |     |        |        |        |      |      |
| HETATM | 8402 | H8 | PRP | 562 | -6.968 | 23.716 | 10.141 | 1.00 | 0.00 |
| H      |      |    |     |     |        |        |        |      |      |
| HETATM | 8403 | O1 | PRP | 563 | 35.904 | 41.388 | 18.818 | 1.00 | 0.00 |
| O      |      |    |     |     |        |        |        |      |      |
| HETATM | 8404 | H1 | PRP | 563 | 36.221 | 41.619 | 17.941 | 1.00 | 0.00 |
| H      |      |    |     |     |        |        |        |      |      |
| HETATM | 8405 | C1 | PRP | 563 | 34.602 | 40.843 | 18.673 | 1.00 | 0.00 |
| C      |      |    |     |     |        |        |        |      |      |
| HETATM | 8406 | H2 | PRP | 563 | 34.417 | 40.074 | 19.422 | 1.00 | 0.00 |
| H      |      |    |     |     |        |        |        |      |      |
| HETATM | 8407 | H3 | PRP | 563 | 33.895 | 41.672 | 18.712 | 1.00 | 0.00 |
| H      |      |    |     |     |        |        |        |      |      |
| HETATM | 8408 | C2 | PRP | 563 | 34.683 | 40.191 | 17.306 | 1.00 | 0.00 |
| C      |      |    |     |     |        |        |        |      |      |
| HETATM | 8409 | H4 | PRP | 563 | 35.636 | 39.677 | 17.187 | 1.00 | 0.00 |
| H      |      |    |     |     |        |        |        |      |      |
| HETATM | 8410 | O2 | PRP | 563 | 34.376 | 41.003 | 16.278 | 1.00 | 0.00 |
| O      |      |    |     |     |        |        |        |      |      |
| HETATM | 8411 | H5 | PRP | 563 | 33.480 | 41.336 | 16.369 | 1.00 | 0.00 |
| H      |      |    |     |     |        |        |        |      |      |
| HETATM | 8412 | C3 | PRP | 563 | 33.556 | 39.133 | 17.256 | 1.00 | 0.00 |
| C      |      |    |     |     |        |        |        |      |      |
| HETATM | 8413 | H6 | PRP | 563 | 32.535 | 39.509 | 17.193 | 1.00 | 0.00 |
| H      |      |    |     |     |        |        |        |      |      |
| HETATM | 8414 | H7 | PRP | 563 | 33.701 | 38.419 | 16.445 | 1.00 | 0.00 |
| H      |      |    |     |     |        |        |        |      |      |
| HETATM | 8415 | H8 | PRP | 563 | 33.729 | 38.552 | 18.161 | 1.00 | 0.00 |
| H      |      |    |     |     |        |        |        |      |      |
| HETATM | 8416 | O1 | PRP | 564 | 11.385 | 15.033 | 9.112  | 1.00 | 0.00 |
| O      |      |    |     |     |        |        |        |      |      |
| HETATM | 8417 | H1 | PRP | 564 | 11.776 | 15.824 | 8.735  | 1.00 | 0.00 |
| H      |      |    |     |     |        |        |        |      |      |
| HETATM | 8418 | C1 | PRP | 564 | 11.242 | 15.242 | 10.519 | 1.00 | 0.00 |
| C      |      |    |     |     |        |        |        |      |      |
| HETATM | 8419 | H2 | PRP | 564 | 10.638 | 16.131 | 10.704 | 1.00 | 0.00 |
| H      |      |    |     |     |        |        |        |      |      |
| HETATM | 8420 | H3 | PRP | 564 | 10.929 | 14.337 | 11.038 | 1.00 | 0.00 |
| H      |      |    |     |     |        |        |        |      |      |
| HETATM | 8421 | C2 | PRP | 564 | 12.602 | 15.410 | 11.197 | 1.00 | 0.00 |
| C      |      |    |     |     |        |        |        |      |      |
| HETATM | 8422 | H4 | PRP | 564 | 12.381 | 15.513 | 12.259 | 1.00 | 0.00 |
| H      |      |    |     |     |        |        |        |      |      |
| HETATM | 8423 | O2 | PRP | 564 | 13.292 | 16.510 | 10.694 | 1.00 | 0.00 |
| O      |      |    |     |     |        |        |        |      |      |
| HETATM | 8424 | H5 | PRP | 564 | 13.699 | 16.334 | 9.842  | 1.00 | 0.00 |
| H      |      |    |     |     |        |        |        |      |      |
| HETATM | 8425 | C3 | PRP | 564 | 13.582 | 14.204 | 11.055 | 1.00 | 0.00 |
| C      |      |    |     |     |        |        |        |      |      |
| HETATM | 8426 | H6 | PRP | 564 | 13.059 | 13.269 | 11.258 | 1.00 | 0.00 |
| H      |      |    |     |     |        |        |        |      |      |
| HETATM | 8427 | H7 | PRP | 564 | 13.968 | 14.213 | 10.035 | 1.00 | 0.00 |
| H      |      |    |     |     |        |        |        |      |      |



|        |      |    |     |     |        |        |        |      |      |
|--------|------|----|-----|-----|--------|--------|--------|------|------|
| HETATM | 8428 | H8 | PRP | 564 | 14.416 | 14.269 | 11.753 | 1.00 | 0.00 |
| H      |      |    |     |     |        |        |        |      |      |
| HETATM | 8429 | O1 | PRP | 565 | 9.327  | 19.054 | 15.039 | 1.00 | 0.00 |
| O      |      |    |     |     |        |        |        |      |      |
| HETATM | 8430 | H1 | PRP | 565 | 8.573  | 18.647 | 14.605 | 1.00 | 0.00 |
| H      |      |    |     |     |        |        |        |      |      |
| HETATM | 8431 | C1 | PRP | 565 | 10.323 | 18.861 | 14.155 | 1.00 | 0.00 |
| C      |      |    |     |     |        |        |        |      |      |
| HETATM | 8432 | H2 | PRP | 565 | 10.307 | 19.685 | 13.442 | 1.00 | 0.00 |
| H      |      |    |     |     |        |        |        |      |      |
| HETATM | 8433 | H3 | PRP | 565 | 11.327 | 19.000 | 14.557 | 1.00 | 0.00 |
| H      |      |    |     |     |        |        |        |      |      |
| HETATM | 8434 | C2 | PRP | 565 | 10.218 | 17.494 | 13.411 | 1.00 | 0.00 |
| C      |      |    |     |     |        |        |        |      |      |
| HETATM | 8435 | H4 | PRP | 565 | 11.023 | 17.369 | 12.687 | 1.00 | 0.00 |
| H      |      |    |     |     |        |        |        |      |      |
| HETATM | 8436 | O2 | PRP | 565 | 8.929  | 17.382 | 12.830 | 1.00 | 0.00 |
| O      |      |    |     |     |        |        |        |      |      |
| HETATM | 8437 | H5 | PRP | 565 | 8.852  | 18.094 | 12.191 | 1.00 | 0.00 |
| H      |      |    |     |     |        |        |        |      |      |
| HETATM | 8438 | C3 | PRP | 565 | 10.268 | 16.367 | 14.365 | 1.00 | 0.00 |
| C      |      |    |     |     |        |        |        |      |      |
| HETATM | 8439 | H6 | PRP | 565 | 9.682  | 16.687 | 15.227 | 1.00 | 0.00 |
| H      |      |    |     |     |        |        |        |      |      |
| HETATM | 8440 | H7 | PRP | 565 | 9.850  | 15.447 | 13.956 | 1.00 | 0.00 |
| H      |      |    |     |     |        |        |        |      |      |
| HETATM | 8441 | H8 | PRP | 565 | 11.296 | 16.148 | 14.652 | 1.00 | 0.00 |
| H      |      |    |     |     |        |        |        |      |      |
| HETATM | 8442 | O1 | PRP | 566 | 13.363 | 19.187 | 11.260 | 1.00 | 0.00 |
| O      |      |    |     |     |        |        |        |      |      |
| HETATM | 8443 | H1 | PRP | 566 | 13.297 | 18.232 | 11.331 | 1.00 | 0.00 |
| H      |      |    |     |     |        |        |        |      |      |
| HETATM | 8444 | C1 | PRP | 566 | 13.510 | 19.666 | 12.556 | 1.00 | 0.00 |
| C      |      |    |     |     |        |        |        |      |      |
| HETATM | 8445 | H2 | PRP | 566 | 12.558 | 20.034 | 12.940 | 1.00 | 0.00 |
| H      |      |    |     |     |        |        |        |      |      |
| HETATM | 8446 | H3 | PRP | 566 | 13.878 | 18.865 | 13.197 | 1.00 | 0.00 |
| H      |      |    |     |     |        |        |        |      |      |
| HETATM | 8447 | C2 | PRP | 566 | 14.438 | 20.905 | 12.733 | 1.00 | 0.00 |
| C      |      |    |     |     |        |        |        |      |      |
| HETATM | 8448 | H4 | PRP | 566 | 14.004 | 21.776 | 12.243 | 1.00 | 0.00 |
| H      |      |    |     |     |        |        |        |      |      |
| HETATM | 8449 | O2 | PRP | 566 | 15.740 | 20.537 | 12.206 | 1.00 | 0.00 |
| O      |      |    |     |     |        |        |        |      |      |
| HETATM | 8450 | H5 | PRP | 566 | 15.808 | 20.766 | 11.276 | 1.00 | 0.00 |
| H      |      |    |     |     |        |        |        |      |      |
| HETATM | 8451 | C3 | PRP | 566 | 14.656 | 21.219 | 14.235 | 1.00 | 0.00 |
| C      |      |    |     |     |        |        |        |      |      |
| HETATM | 8452 | H6 | PRP | 566 | 15.217 | 20.385 | 14.658 | 1.00 | 0.00 |
| H      |      |    |     |     |        |        |        |      |      |
| HETATM | 8453 | H7 | PRP | 566 | 15.311 | 22.073 | 14.408 | 1.00 | 0.00 |
| H      |      |    |     |     |        |        |        |      |      |
| HETATM | 8454 | H8 | PRP | 566 | 13.734 | 21.252 | 14.815 | 1.00 | 0.00 |
| H      |      |    |     |     |        |        |        |      |      |
| HETATM | 8455 | O1 | PRP | 567 | 19.850 | 40.568 | 4.270  | 1.00 | 0.00 |
| O      |      |    |     |     |        |        |        |      |      |

|        |      |    |     |     |        |        |        |      |      |
|--------|------|----|-----|-----|--------|--------|--------|------|------|
| HETATM | 8456 | H1 | PRP | 567 | 19.953 | 39.624 | 4.406  | 1.00 | 0.00 |
| H      |      |    |     |     |        |        |        |      |      |
| HETATM | 8457 | C1 | PRP | 567 | 18.977 | 41.154 | 5.249  | 1.00 | 0.00 |
| C      |      |    |     |     |        |        |        |      |      |
| HETATM | 8458 | H2 | PRP | 567 | 18.935 | 42.237 | 5.126  | 1.00 | 0.00 |
| H      |      |    |     |     |        |        |        |      |      |
| HETATM | 8459 | H3 | PRP | 567 | 17.947 | 40.864 | 5.045  | 1.00 | 0.00 |
| H      |      |    |     |     |        |        |        |      |      |
| HETATM | 8460 | C2 | PRP | 567 | 19.360 | 40.827 | 6.707  | 1.00 | 0.00 |
| C      |      |    |     |     |        |        |        |      |      |
| HETATM | 8461 | H4 | PRP | 567 | 20.419 | 41.069 | 6.795  | 1.00 | 0.00 |
| H      |      |    |     |     |        |        |        |      |      |
| HETATM | 8462 | O2 | PRP | 567 | 19.152 | 39.400 | 6.980  | 1.00 | 0.00 |
| O      |      |    |     |     |        |        |        |      |      |
| HETATM | 8463 | H5 | PRP | 567 | 19.261 | 39.362 | 7.933  | 1.00 | 0.00 |
| H      |      |    |     |     |        |        |        |      |      |
| HETATM | 8464 | C3 | PRP | 567 | 18.466 | 41.651 | 7.685  | 1.00 | 0.00 |
| C      |      |    |     |     |        |        |        |      |      |
| HETATM | 8465 | H6 | PRP | 567 | 17.455 | 41.288 | 7.500  | 1.00 | 0.00 |
| H      |      |    |     |     |        |        |        |      |      |
| HETATM | 8466 | H7 | PRP | 567 | 18.819 | 41.641 | 8.716  | 1.00 | 0.00 |
| H      |      |    |     |     |        |        |        |      |      |
| HETATM | 8467 | H8 | PRP | 567 | 18.524 | 42.700 | 7.395  | 1.00 | 0.00 |
| H      |      |    |     |     |        |        |        |      |      |
| HETATM | 8468 | O1 | PRP | 568 | 8.236  | 12.052 | 14.556 | 1.00 | 0.00 |
| O      |      |    |     |     |        |        |        |      |      |
| HETATM | 8469 | H1 | PRP | 568 | 8.165  | 12.087 | 13.600 | 1.00 | 0.00 |
| H      |      |    |     |     |        |        |        |      |      |
| HETATM | 8470 | C1 | PRP | 568 | 9.450  | 11.584 | 14.989 | 1.00 | 0.00 |
| C      |      |    |     |     |        |        |        |      |      |
| HETATM | 8471 | H2 | PRP | 568 | 9.858  | 10.832 | 14.313 | 1.00 | 0.00 |
| H      |      |    |     |     |        |        |        |      |      |
| HETATM | 8472 | H3 | PRP | 568 | 10.112 | 12.443 | 15.098 | 1.00 | 0.00 |
| H      |      |    |     |     |        |        |        |      |      |
| HETATM | 8473 | C2 | PRP | 568 | 9.326  | 11.056 | 16.447 | 1.00 | 0.00 |
| C      |      |    |     |     |        |        |        |      |      |
| HETATM | 8474 | H4 | PRP | 568 | 10.252 | 10.591 | 16.786 | 1.00 | 0.00 |
| H      |      |    |     |     |        |        |        |      |      |
| HETATM | 8475 | O2 | PRP | 568 | 8.294  | 10.082 | 16.538 | 1.00 | 0.00 |
| O      |      |    |     |     |        |        |        |      |      |
| HETATM | 8476 | H5 | PRP | 568 | 8.420  | 9.488  | 15.794 | 1.00 | 0.00 |
| H      |      |    |     |     |        |        |        |      |      |
| HETATM | 8477 | C3 | PRP | 568 | 9.116  | 12.184 | 17.505 | 1.00 | 0.00 |
| C      |      |    |     |     |        |        |        |      |      |
| HETATM | 8478 | H6 | PRP | 568 | 9.197  | 11.782 | 18.515 | 1.00 | 0.00 |
| H      |      |    |     |     |        |        |        |      |      |
| HETATM | 8479 | H7 | PRP | 568 | 9.908  | 12.863 | 17.190 | 1.00 | 0.00 |
| H      |      |    |     |     |        |        |        |      |      |
| HETATM | 8480 | H8 | PRP | 568 | 8.141  | 12.623 | 17.293 | 1.00 | 0.00 |
| H      |      |    |     |     |        |        |        |      |      |
| HETATM | 8481 | O1 | PRP | 569 | 17.817 | 13.727 | 1.674  | 1.00 | 0.00 |
| O      |      |    |     |     |        |        |        |      |      |
| HETATM | 8482 | H1 | PRP | 569 | 17.946 | 12.993 | 1.069  | 1.00 | 0.00 |
| H      |      |    |     |     |        |        |        |      |      |
| HETATM | 8483 | C1 | PRP | 569 | 16.424 | 13.899 | 1.676  | 1.00 | 0.00 |
| C      |      |    |     |     |        |        |        |      |      |

|        |      |    |     |     |        |        |        |      |      |
|--------|------|----|-----|-----|--------|--------|--------|------|------|
| HETATM | 8484 | H2 | PRP | 569 | 16.229 | 14.967 | 1.772  | 1.00 | 0.00 |
| H      |      |    |     |     |        |        |        |      |      |
| HETATM | 8485 | H3 | PRP | 569 | 16.024 | 13.719 | 0.678  | 1.00 | 0.00 |
| H      |      |    |     |     |        |        |        |      |      |
| HETATM | 8486 | C2 | PRP | 569 | 15.793 | 13.142 | 2.877  | 1.00 | 0.00 |
| C      |      |    |     |     |        |        |        |      |      |
| HETATM | 8487 | H4 | PRP | 569 | 16.252 | 13.569 | 3.768  | 1.00 | 0.00 |
| H      |      |    |     |     |        |        |        |      |      |
| HETATM | 8488 | O2 | PRP | 569 | 15.878 | 11.747 | 2.756  | 1.00 | 0.00 |
| O      |      |    |     |     |        |        |        |      |      |
| HETATM | 8489 | H5 | PRP | 569 | 16.654 | 11.353 | 3.162  | 1.00 | 0.00 |
| H      |      |    |     |     |        |        |        |      |      |
| HETATM | 8490 | C3 | PRP | 569 | 14.281 | 13.485 | 3.124  | 1.00 | 0.00 |
| C      |      |    |     |     |        |        |        |      |      |
| HETATM | 8491 | H6 | PRP | 569 | 14.196 | 14.544 | 3.366  | 1.00 | 0.00 |
| H      |      |    |     |     |        |        |        |      |      |
| HETATM | 8492 | H7 | PRP | 569 | 13.670 | 13.223 | 2.260  | 1.00 | 0.00 |
| H      |      |    |     |     |        |        |        |      |      |
| HETATM | 8493 | H8 | PRP | 569 | 13.860 | 12.805 | 3.865  | 1.00 | 0.00 |
| H      |      |    |     |     |        |        |        |      |      |
| HETATM | 8494 | O1 | PRP | 570 | 8.247  | 19.435 | 11.227 | 1.00 | 0.00 |
| O      |      |    |     |     |        |        |        |      |      |
| HETATM | 8495 | H1 | PRP | 570 | 7.488  | 20.011 | 11.109 | 1.00 | 0.00 |
| H      |      |    |     |     |        |        |        |      |      |
| HETATM | 8496 | C1 | PRP | 570 | 8.877  | 19.303 | 10.007 | 1.00 | 0.00 |
| C      |      |    |     |     |        |        |        |      |      |
| HETATM | 8497 | H2 | PRP | 570 | 8.766  | 20.130 | 9.306  | 1.00 | 0.00 |
| H      |      |    |     |     |        |        |        |      |      |
| HETATM | 8498 | H3 | PRP | 570 | 9.954  | 19.263 | 10.169 | 1.00 | 0.00 |
| H      |      |    |     |     |        |        |        |      |      |
| HETATM | 8499 | C2 | PRP | 570 | 8.534  | 17.933 | 9.399  | 1.00 | 0.00 |
| C      |      |    |     |     |        |        |        |      |      |
| HETATM | 8500 | H4 | PRP | 570 | 9.136  | 17.212 | 9.951  | 1.00 | 0.00 |
| H      |      |    |     |     |        |        |        |      |      |
| HETATM | 8501 | O2 | PRP | 570 | 9.033  | 17.895 | 8.087  | 1.00 | 0.00 |
| O      |      |    |     |     |        |        |        |      |      |
| HETATM | 8502 | H5 | PRP | 570 | 9.984  | 18.007 | 8.148  | 1.00 | 0.00 |
| H      |      |    |     |     |        |        |        |      |      |
| HETATM | 8503 | C3 | PRP | 570 | 7.117  | 17.418 | 9.399  | 1.00 | 0.00 |
| C      |      |    |     |     |        |        |        |      |      |
| HETATM | 8504 | H6 | PRP | 570 | 6.502  | 17.972 | 8.689  | 1.00 | 0.00 |
| H      |      |    |     |     |        |        |        |      |      |
| HETATM | 8505 | H7 | PRP | 570 | 7.156  | 16.397 | 9.020  | 1.00 | 0.00 |
| H      |      |    |     |     |        |        |        |      |      |
| HETATM | 8506 | H8 | PRP | 570 | 6.702  | 17.467 | 10.406 | 1.00 | 0.00 |
| H      |      |    |     |     |        |        |        |      |      |
| HETATM | 8507 | O1 | PRP | 571 | 17.405 | 18.175 | 12.389 | 1.00 | 0.00 |
| O      |      |    |     |     |        |        |        |      |      |
| HETATM | 8508 | H1 | PRP | 571 | 16.781 | 18.903 | 12.433 | 1.00 | 0.00 |
| H      |      |    |     |     |        |        |        |      |      |
| HETATM | 8509 | C1 | PRP | 571 | 16.748 | 16.901 | 12.453 | 1.00 | 0.00 |
| C      |      |    |     |     |        |        |        |      |      |
| HETATM | 8510 | H2 | PRP | 571 | 16.275 | 16.769 | 13.426 | 1.00 | 0.00 |
| H      |      |    |     |     |        |        |        |      |      |
| HETATM | 8511 | H3 | PRP | 571 | 15.946 | 16.943 | 11.716 | 1.00 | 0.00 |
| H      |      |    |     |     |        |        |        |      |      |

|        |      |    |     |     |        |        |        |      |      |
|--------|------|----|-----|-----|--------|--------|--------|------|------|
| HETATM | 8512 | C2 | PRP | 571 | 17.653 | 15.707 | 12.027 | 1.00 | 0.00 |
| C      |      |    |     |     |        |        |        |      |      |
| HETATM | 8513 | H4 | PRP | 571 | 17.315 | 14.742 | 12.407 | 1.00 | 0.00 |
| H      |      |    |     |     |        |        |        |      |      |
| HETATM | 8514 | O2 | PRP | 571 | 18.854 | 15.887 | 12.698 | 1.00 | 0.00 |
| O      |      |    |     |     |        |        |        |      |      |
| HETATM | 8515 | H5 | PRP | 571 | 18.704 | 16.497 | 13.424 | 1.00 | 0.00 |
| H      |      |    |     |     |        |        |        |      |      |
| HETATM | 8516 | C3 | PRP | 571 | 17.952 | 15.428 | 10.524 | 1.00 | 0.00 |
| C      |      |    |     |     |        |        |        |      |      |
| HETATM | 8517 | H6 | PRP | 571 | 18.494 | 14.503 | 10.329 | 1.00 | 0.00 |
| H      |      |    |     |     |        |        |        |      |      |
| HETATM | 8518 | H7 | PRP | 571 | 16.997 | 15.375 | 10.002 | 1.00 | 0.00 |
| H      |      |    |     |     |        |        |        |      |      |
| HETATM | 8519 | H8 | PRP | 571 | 18.491 | 16.267 | 10.082 | 1.00 | 0.00 |
| H      |      |    |     |     |        |        |        |      |      |
| HETATM | 8520 | O1 | PRP | 572 | 30.479 | 47.678 | 11.870 | 1.00 | 0.00 |
| O      |      |    |     |     |        |        |        |      |      |
| HETATM | 8521 | H1 | PRP | 572 | 30.137 | 47.527 | 12.754 | 1.00 | 0.00 |
| H      |      |    |     |     |        |        |        |      |      |
| HETATM | 8522 | C1 | PRP | 572 | 30.997 | 46.519 | 11.275 | 1.00 | 0.00 |
| C      |      |    |     |     |        |        |        |      |      |
| HETATM | 8523 | H2 | PRP | 572 | 31.787 | 46.859 | 10.605 | 1.00 | 0.00 |
| H      |      |    |     |     |        |        |        |      |      |
| HETATM | 8524 | H3 | PRP | 572 | 31.393 | 45.892 | 12.074 | 1.00 | 0.00 |
| H      |      |    |     |     |        |        |        |      |      |
| HETATM | 8525 | C2 | PRP | 572 | 29.951 | 45.889 | 10.432 | 1.00 | 0.00 |
| C      |      |    |     |     |        |        |        |      |      |
| HETATM | 8526 | H4 | PRP | 572 | 29.632 | 46.554 | 9.629  | 1.00 | 0.00 |
| H      |      |    |     |     |        |        |        |      |      |
| HETATM | 8527 | O2 | PRP | 572 | 28.782 | 45.690 | 11.186 | 1.00 | 0.00 |
| O      |      |    |     |     |        |        |        |      |      |
| HETATM | 8528 | H5 | PRP | 572 | 28.384 | 46.556 | 11.303 | 1.00 | 0.00 |
| H      |      |    |     |     |        |        |        |      |      |
| HETATM | 8529 | C3 | PRP | 572 | 30.493 | 44.629 | 9.784  | 1.00 | 0.00 |
| C      |      |    |     |     |        |        |        |      |      |
| HETATM | 8530 | H6 | PRP | 572 | 30.727 | 43.901 | 10.561 | 1.00 | 0.00 |
| H      |      |    |     |     |        |        |        |      |      |
| HETATM | 8531 | H7 | PRP | 572 | 29.668 | 44.099 | 9.308  | 1.00 | 0.00 |
| H      |      |    |     |     |        |        |        |      |      |
| HETATM | 8532 | H8 | PRP | 572 | 31.277 | 44.754 | 9.037  | 1.00 | 0.00 |
| H      |      |    |     |     |        |        |        |      |      |
| HETATM | 8533 | O1 | PRP | 573 | 28.133 | 36.439 | 17.805 | 1.00 | 0.00 |
| O      |      |    |     |     |        |        |        |      |      |
| HETATM | 8534 | H1 | PRP | 573 | 28.717 | 36.739 | 18.505 | 1.00 | 0.00 |
| H      |      |    |     |     |        |        |        |      |      |
| HETATM | 8535 | C1 | PRP | 573 | 27.214 | 37.570 | 17.661 | 1.00 | 0.00 |
| C      |      |    |     |     |        |        |        |      |      |
| HETATM | 8536 | H2 | PRP | 573 | 26.202 | 37.163 | 17.643 | 1.00 | 0.00 |
| H      |      |    |     |     |        |        |        |      |      |
| HETATM | 8537 | H3 | PRP | 573 | 27.299 | 38.076 | 18.623 | 1.00 | 0.00 |
| H      |      |    |     |     |        |        |        |      |      |
| HETATM | 8538 | C2 | PRP | 573 | 27.725 | 38.318 | 16.469 | 1.00 | 0.00 |
| C      |      |    |     |     |        |        |        |      |      |
| HETATM | 8539 | H4 | PRP | 573 | 27.727 | 37.711 | 15.563 | 1.00 | 0.00 |
| H      |      |    |     |     |        |        |        |      |      |

|        |      |    |     |     |        |        |        |      |      |
|--------|------|----|-----|-----|--------|--------|--------|------|------|
| HETATM | 8540 | O2 | PRP | 573 | 29.073 | 38.862 | 16.626 | 1.00 | 0.00 |
| O      |      |    |     |     |        |        |        |      |      |
| HETATM | 8541 | H5 | PRP | 573 | 29.721 | 38.155 | 16.677 | 1.00 | 0.00 |
| H      |      |    |     |     |        |        |        |      |      |
| HETATM | 8542 | C3 | PRP | 573 | 26.949 | 39.557 | 16.248 | 1.00 | 0.00 |
| C      |      |    |     |     |        |        |        |      |      |
| HETATM | 8543 | H6 | PRP | 573 | 25.907 | 39.452 | 16.550 | 1.00 | 0.00 |
| H      |      |    |     |     |        |        |        |      |      |
| HETATM | 8544 | H7 | PRP | 573 | 27.243 | 40.322 | 16.966 | 1.00 | 0.00 |
| H      |      |    |     |     |        |        |        |      |      |
| HETATM | 8545 | H8 | PRP | 573 | 26.963 | 39.877 | 15.206 | 1.00 | 0.00 |
| H      |      |    |     |     |        |        |        |      |      |
| HETATM | 8546 | O1 | PRP | 574 | 41.755 | 59.548 | 27.918 | 1.00 | 0.00 |
| O      |      |    |     |     |        |        |        |      |      |
| HETATM | 8547 | H1 | PRP | 574 | 41.606 | 59.840 | 27.015 | 1.00 | 0.00 |
| H      |      |    |     |     |        |        |        |      |      |
| HETATM | 8548 | C1 | PRP | 574 | 43.007 | 58.899 | 27.902 | 1.00 | 0.00 |
| C      |      |    |     |     |        |        |        |      |      |
| HETATM | 8549 | H2 | PRP | 574 | 43.645 | 59.514 | 27.267 | 1.00 | 0.00 |
| H      |      |    |     |     |        |        |        |      |      |
| HETATM | 8550 | H3 | PRP | 574 | 43.331 | 59.085 | 28.926 | 1.00 | 0.00 |
| H      |      |    |     |     |        |        |        |      |      |
| HETATM | 8551 | C2 | PRP | 574 | 42.680 | 57.428 | 27.405 | 1.00 | 0.00 |
| C      |      |    |     |     |        |        |        |      |      |
| HETATM | 8552 | H4 | PRP | 574 | 43.625 | 56.909 | 27.247 | 1.00 | 0.00 |
| H      |      |    |     |     |        |        |        |      |      |
| HETATM | 8553 | O2 | PRP | 574 | 41.990 | 57.473 | 26.207 | 1.00 | 0.00 |
| O      |      |    |     |     |        |        |        |      |      |
| HETATM | 8554 | H5 | PRP | 574 | 41.106 | 57.841 | 26.277 | 1.00 | 0.00 |
| H      |      |    |     |     |        |        |        |      |      |
| HETATM | 8555 | C3 | PRP | 574 | 41.861 | 56.639 | 28.421 | 1.00 | 0.00 |
| C      |      |    |     |     |        |        |        |      |      |
| HETATM | 8556 | H6 | PRP | 574 | 41.516 | 55.671 | 28.058 | 1.00 | 0.00 |
| H      |      |    |     |     |        |        |        |      |      |
| HETATM | 8557 | H7 | PRP | 574 | 42.389 | 56.370 | 29.336 | 1.00 | 0.00 |
| H      |      |    |     |     |        |        |        |      |      |
| HETATM | 8558 | H8 | PRP | 574 | 41.046 | 57.268 | 28.777 | 1.00 | 0.00 |
| H      |      |    |     |     |        |        |        |      |      |
| HETATM | 8559 | O1 | PRP | 575 | 24.999 | 47.774 | 40.113 | 1.00 | 0.00 |
| O      |      |    |     |     |        |        |        |      |      |
| HETATM | 8560 | H1 | PRP | 575 | 24.590 | 47.539 | 39.277 | 1.00 | 0.00 |
| H      |      |    |     |     |        |        |        |      |      |
| HETATM | 8561 | C1 | PRP | 575 | 26.390 | 47.290 | 40.137 | 1.00 | 0.00 |
| C      |      |    |     |     |        |        |        |      |      |
| HETATM | 8562 | H2 | PRP | 575 | 26.324 | 46.243 | 39.840 | 1.00 | 0.00 |
| H      |      |    |     |     |        |        |        |      |      |
| HETATM | 8563 | H3 | PRP | 575 | 27.015 | 47.747 | 39.369 | 1.00 | 0.00 |
| H      |      |    |     |     |        |        |        |      |      |
| HETATM | 8564 | C2 | PRP | 575 | 26.948 | 47.462 | 41.501 | 1.00 | 0.00 |
| C      |      |    |     |     |        |        |        |      |      |
| HETATM | 8565 | H4 | PRP | 575 | 26.268 | 46.935 | 42.171 | 1.00 | 0.00 |
| H      |      |    |     |     |        |        |        |      |      |
| HETATM | 8566 | O2 | PRP | 575 | 26.814 | 48.843 | 41.818 | 1.00 | 0.00 |
| O      |      |    |     |     |        |        |        |      |      |
| HETATM | 8567 | H5 | PRP | 575 | 26.125 | 49.091 | 41.197 | 1.00 | 0.00 |
| H      |      |    |     |     |        |        |        |      |      |

|        |      |    |     |     |        |        |        |      |      |
|--------|------|----|-----|-----|--------|--------|--------|------|------|
| HETATM | 8568 | C3 | PRP | 575 | 28.415 | 47.117 | 41.881 | 1.00 | 0.00 |
| C      |      |    |     |     |        |        |        |      |      |
| HETATM | 8569 | H6 | PRP | 575 | 28.578 | 46.051 | 42.039 | 1.00 | 0.00 |
| H      |      |    |     |     |        |        |        |      |      |
| HETATM | 8570 | H7 | PRP | 575 | 29.142 | 47.391 | 41.117 | 1.00 | 0.00 |
| H      |      |    |     |     |        |        |        |      |      |
| HETATM | 8571 | H8 | PRP | 575 | 28.534 | 47.628 | 42.836 | 1.00 | 0.00 |
| H      |      |    |     |     |        |        |        |      |      |
| HETATM | 8572 | O1 | PRP | 576 | 49.145 | 30.239 | 36.691 | 1.00 | 0.00 |
| O      |      |    |     |     |        |        |        |      |      |
| HETATM | 8573 | H1 | PRP | 576 | 49.059 | 29.285 | 36.743 | 1.00 | 0.00 |
| H      |      |    |     |     |        |        |        |      |      |
| HETATM | 8574 | C1 | PRP | 576 | 47.875 | 30.860 | 36.974 | 1.00 | 0.00 |
| C      |      |    |     |     |        |        |        |      |      |
| HETATM | 8575 | H2 | PRP | 576 | 47.666 | 31.807 | 36.477 | 1.00 | 0.00 |
| H      |      |    |     |     |        |        |        |      |      |
| HETATM | 8576 | H3 | PRP | 576 | 47.067 | 30.241 | 36.582 | 1.00 | 0.00 |
| H      |      |    |     |     |        |        |        |      |      |
| HETATM | 8577 | C2 | PRP | 576 | 47.739 | 30.934 | 38.460 | 1.00 | 0.00 |
| C      |      |    |     |     |        |        |        |      |      |
| HETATM | 8578 | H4 | PRP | 576 | 48.580 | 31.524 | 38.825 | 1.00 | 0.00 |
| H      |      |    |     |     |        |        |        |      |      |
| HETATM | 8579 | O2 | PRP | 576 | 47.638 | 29.761 | 39.232 | 1.00 | 0.00 |
| O      |      |    |     |     |        |        |        |      |      |
| HETATM | 8580 | H5 | PRP | 576 | 48.111 | 29.968 | 40.042 | 1.00 | 0.00 |
| H      |      |    |     |     |        |        |        |      |      |
| HETATM | 8581 | C3 | PRP | 576 | 46.401 | 31.685 | 38.800 | 1.00 | 0.00 |
| C      |      |    |     |     |        |        |        |      |      |
| HETATM | 8582 | H6 | PRP | 576 | 46.242 | 31.677 | 39.878 | 1.00 | 0.00 |
| H      |      |    |     |     |        |        |        |      |      |
| HETATM | 8583 | H7 | PRP | 576 | 46.499 | 32.728 | 38.499 | 1.00 | 0.00 |
| H      |      |    |     |     |        |        |        |      |      |
| HETATM | 8584 | H8 | PRP | 576 | 45.552 | 31.204 | 38.315 | 1.00 | 0.00 |
| H      |      |    |     |     |        |        |        |      |      |
| HETATM | 8585 | O1 | PRP | 577 | 22.425 | 48.556 | 44.177 | 1.00 | 0.00 |
| O      |      |    |     |     |        |        |        |      |      |
| HETATM | 8586 | H1 | PRP | 577 | 21.605 | 48.844 | 43.769 | 1.00 | 0.00 |
| H      |      |    |     |     |        |        |        |      |      |
| HETATM | 8587 | C1 | PRP | 577 | 23.212 | 47.689 | 43.338 | 1.00 | 0.00 |
| C      |      |    |     |     |        |        |        |      |      |
| HETATM | 8588 | H2 | PRP | 577 | 23.469 | 48.286 | 42.463 | 1.00 | 0.00 |
| H      |      |    |     |     |        |        |        |      |      |
| HETATM | 8589 | H3 | PRP | 577 | 24.096 | 47.409 | 43.911 | 1.00 | 0.00 |
| H      |      |    |     |     |        |        |        |      |      |
| HETATM | 8590 | C2 | PRP | 577 | 22.424 | 46.454 | 42.914 | 1.00 | 0.00 |
| C      |      |    |     |     |        |        |        |      |      |
| HETATM | 8591 | H4 | PRP | 577 | 21.401 | 46.773 | 42.712 | 1.00 | 0.00 |
| H      |      |    |     |     |        |        |        |      |      |
| HETATM | 8592 | O2 | PRP | 577 | 22.298 | 45.466 | 43.931 | 1.00 | 0.00 |
| O      |      |    |     |     |        |        |        |      |      |
| HETATM | 8593 | H5 | PRP | 577 | 21.826 | 45.921 | 44.632 | 1.00 | 0.00 |
| H      |      |    |     |     |        |        |        |      |      |
| HETATM | 8594 | C3 | PRP | 577 | 22.879 | 45.862 | 41.626 | 1.00 | 0.00 |
| C      |      |    |     |     |        |        |        |      |      |
| HETATM | 8595 | H6 | PRP | 577 | 22.386 | 44.902 | 41.477 | 1.00 | 0.00 |
| H      |      |    |     |     |        |        |        |      |      |

|        |      |    |     |     |        |        |        |      |      |
|--------|------|----|-----|-----|--------|--------|--------|------|------|
| HETATM | 8596 | H7 | PRP | 577 | 22.501 | 46.427 | 40.774 | 1.00 | 0.00 |
| H      |      |    |     |     |        |        |        |      |      |
| HETATM | 8597 | H8 | PRP | 577 | 23.935 | 45.596 | 41.592 | 1.00 | 0.00 |
| H      |      |    |     |     |        |        |        |      |      |
| HETATM | 8598 | O1 | PRP | 578 | 29.687 | 44.762 | 25.515 | 1.00 | 0.00 |
| O      |      |    |     |     |        |        |        |      |      |
| HETATM | 8599 | H1 | PRP | 578 | 30.623 | 44.940 | 25.634 | 1.00 | 0.00 |
| H      |      |    |     |     |        |        |        |      |      |
| HETATM | 8600 | C1 | PRP | 578 | 29.246 | 45.176 | 24.230 | 1.00 | 0.00 |
| C      |      |    |     |     |        |        |        |      |      |
| HETATM | 8601 | H2 | PRP | 578 | 28.557 | 46.008 | 24.379 | 1.00 | 0.00 |
| H      |      |    |     |     |        |        |        |      |      |
| HETATM | 8602 | H3 | PRP | 578 | 30.091 | 45.583 | 23.674 | 1.00 | 0.00 |
| H      |      |    |     |     |        |        |        |      |      |
| HETATM | 8603 | C2 | PRP | 578 | 28.609 | 44.030 | 23.411 | 1.00 | 0.00 |
| C      |      |    |     |     |        |        |        |      |      |
| HETATM | 8604 | H4 | PRP | 578 | 27.991 | 44.433 | 22.609 | 1.00 | 0.00 |
| H      |      |    |     |     |        |        |        |      |      |
| HETATM | 8605 | O2 | PRP | 578 | 27.766 | 43.204 | 24.169 | 1.00 | 0.00 |
| O      |      |    |     |     |        |        |        |      |      |
| HETATM | 8606 | H5 | PRP | 578 | 28.189 | 42.918 | 24.982 | 1.00 | 0.00 |
| H      |      |    |     |     |        |        |        |      |      |
| HETATM | 8607 | C3 | PRP | 578 | 29.672 | 43.153 | 22.739 | 1.00 | 0.00 |
| C      |      |    |     |     |        |        |        |      |      |
| HETATM | 8608 | H6 | PRP | 578 | 29.223 | 42.297 | 22.234 | 1.00 | 0.00 |
| H      |      |    |     |     |        |        |        |      |      |
| HETATM | 8609 | H7 | PRP | 578 | 30.171 | 43.746 | 21.973 | 1.00 | 0.00 |
| H      |      |    |     |     |        |        |        |      |      |
| HETATM | 8610 | H8 | PRP | 578 | 30.395 | 42.770 | 23.459 | 1.00 | 0.00 |
| H      |      |    |     |     |        |        |        |      |      |
| HETATM | 8611 | O1 | PRP | 579 | 50.025 | 40.221 | 38.548 | 1.00 | 0.00 |
| O      |      |    |     |     |        |        |        |      |      |
| HETATM | 8612 | H1 | PRP | 579 | 49.365 | 39.966 | 39.196 | 1.00 | 0.00 |
| H      |      |    |     |     |        |        |        |      |      |
| HETATM | 8613 | C1 | PRP | 579 | 51.092 | 39.322 | 38.730 | 1.00 | 0.00 |
| C      |      |    |     |     |        |        |        |      |      |
| HETATM | 8614 | H2 | PRP | 579 | 50.847 | 38.391 | 39.241 | 1.00 | 0.00 |
| H      |      |    |     |     |        |        |        |      |      |
| HETATM | 8615 | H3 | PRP | 579 | 51.591 | 39.164 | 37.774 | 1.00 | 0.00 |
| H      |      |    |     |     |        |        |        |      |      |
| HETATM | 8616 | C2 | PRP | 579 | 52.115 | 40.012 | 39.690 | 1.00 | 0.00 |
| C      |      |    |     |     |        |        |        |      |      |
| HETATM | 8617 | H4 | PRP | 579 | 51.590 | 40.869 | 40.111 | 1.00 | 0.00 |
| H      |      |    |     |     |        |        |        |      |      |
| HETATM | 8618 | O2 | PRP | 579 | 53.335 | 40.402 | 39.073 | 1.00 | 0.00 |
| O      |      |    |     |     |        |        |        |      |      |
| HETATM | 8619 | H5 | PRP | 579 | 53.847 | 40.855 | 39.747 | 1.00 | 0.00 |
| H      |      |    |     |     |        |        |        |      |      |
| HETATM | 8620 | C3 | PRP | 579 | 52.490 | 38.970 | 40.787 | 1.00 | 0.00 |
| C      |      |    |     |     |        |        |        |      |      |
| HETATM | 8621 | H6 | PRP | 579 | 52.987 | 38.136 | 40.291 | 1.00 | 0.00 |
| H      |      |    |     |     |        |        |        |      |      |
| HETATM | 8622 | H7 | PRP | 579 | 53.058 | 39.409 | 41.606 | 1.00 | 0.00 |
| H      |      |    |     |     |        |        |        |      |      |
| HETATM | 8623 | H8 | PRP | 579 | 51.579 | 38.559 | 41.223 | 1.00 | 0.00 |
| H      |      |    |     |     |        |        |        |      |      |

|        |      |    |     |     |        |        |        |      |      |
|--------|------|----|-----|-----|--------|--------|--------|------|------|
| HETATM | 8624 | O1 | PRP | 580 | 45.786 | 22.820 | 19.342 | 1.00 | 0.00 |
| O      |      |    |     |     |        |        |        |      |      |
| HETATM | 8625 | H1 | PRP | 580 | 46.326 | 23.149 | 20.064 | 1.00 | 0.00 |
| H      |      |    |     |     |        |        |        |      |      |
| HETATM | 8626 | C1 | PRP | 580 | 45.791 | 23.801 | 18.344 | 1.00 | 0.00 |
| C      |      |    |     |     |        |        |        |      |      |
| HETATM | 8627 | H2 | PRP | 580 | 46.418 | 24.621 | 18.695 | 1.00 | 0.00 |
| H      |      |    |     |     |        |        |        |      |      |
| HETATM | 8628 | H3 | PRP | 580 | 46.155 | 23.322 | 17.435 | 1.00 | 0.00 |
| H      |      |    |     |     |        |        |        |      |      |
| HETATM | 8629 | C2 | PRP | 580 | 44.379 | 24.373 | 18.141 | 1.00 | 0.00 |
| C      |      |    |     |     |        |        |        |      |      |
| HETATM | 8630 | H4 | PRP | 580 | 44.058 | 24.760 | 19.108 | 1.00 | 0.00 |
| H      |      |    |     |     |        |        |        |      |      |
| HETATM | 8631 | O2 | PRP | 580 | 43.530 | 23.296 | 17.832 | 1.00 | 0.00 |
| O      |      |    |     |     |        |        |        |      |      |
| HETATM | 8632 | H5 | PRP | 580 | 43.771 | 22.532 | 18.360 | 1.00 | 0.00 |
| H      |      |    |     |     |        |        |        |      |      |
| HETATM | 8633 | C3 | PRP | 580 | 44.250 | 25.481 | 17.085 | 1.00 | 0.00 |
| C      |      |    |     |     |        |        |        |      |      |
| HETATM | 8634 | H6 | PRP | 580 | 44.565 | 25.121 | 16.106 | 1.00 | 0.00 |
| H      |      |    |     |     |        |        |        |      |      |
| HETATM | 8635 | H7 | PRP | 580 | 43.294 | 25.987 | 17.217 | 1.00 | 0.00 |
| H      |      |    |     |     |        |        |        |      |      |
| HETATM | 8636 | H8 | PRP | 580 | 45.020 | 26.201 | 17.362 | 1.00 | 0.00 |
| H      |      |    |     |     |        |        |        |      |      |
| HETATM | 8637 | O1 | PRP | 581 | 52.125 | 42.480 | 37.415 | 1.00 | 0.00 |
| O      |      |    |     |     |        |        |        |      |      |
| HETATM | 8638 | H1 | PRP | 581 | 52.405 | 41.755 | 37.978 | 1.00 | 0.00 |
| H      |      |    |     |     |        |        |        |      |      |
| HETATM | 8639 | C1 | PRP | 581 | 52.776 | 42.476 | 36.117 | 1.00 | 0.00 |
| C      |      |    |     |     |        |        |        |      |      |
| HETATM | 8640 | H2 | PRP | 581 | 53.751 | 41.992 | 36.193 | 1.00 | 0.00 |
| H      |      |    |     |     |        |        |        |      |      |
| HETATM | 8641 | H3 | PRP | 581 | 52.152 | 41.864 | 35.466 | 1.00 | 0.00 |
| H      |      |    |     |     |        |        |        |      |      |
| HETATM | 8642 | C2 | PRP | 581 | 53.015 | 43.834 | 35.518 | 1.00 | 0.00 |
| C      |      |    |     |     |        |        |        |      |      |
| HETATM | 8643 | H4 | PRP | 581 | 53.302 | 44.533 | 36.305 | 1.00 | 0.00 |
| H      |      |    |     |     |        |        |        |      |      |
| HETATM | 8644 | O2 | PRP | 581 | 51.753 | 44.283 | 35.034 | 1.00 | 0.00 |
| O      |      |    |     |     |        |        |        |      |      |
| HETATM | 8645 | H5 | PRP | 581 | 51.223 | 44.060 | 35.803 | 1.00 | 0.00 |
| H      |      |    |     |     |        |        |        |      |      |
| HETATM | 8646 | C3 | PRP | 581 | 54.022 | 43.958 | 34.396 | 1.00 | 0.00 |
| C      |      |    |     |     |        |        |        |      |      |
| HETATM | 8647 | H6 | PRP | 581 | 54.810 | 43.253 | 34.659 | 1.00 | 0.00 |
| H      |      |    |     |     |        |        |        |      |      |
| HETATM | 8648 | H7 | PRP | 581 | 53.651 | 43.693 | 33.406 | 1.00 | 0.00 |
| H      |      |    |     |     |        |        |        |      |      |
| HETATM | 8649 | H8 | PRP | 581 | 54.369 | 44.988 | 34.316 | 1.00 | 0.00 |
| H      |      |    |     |     |        |        |        |      |      |
| HETATM | 8650 | O1 | PRP | 582 | 54.128 | 24.198 | 24.504 | 1.00 | 0.00 |
| O      |      |    |     |     |        |        |        |      |      |
| HETATM | 8651 | H1 | PRP | 582 | 53.409 | 23.595 | 24.706 | 1.00 | 0.00 |
| H      |      |    |     |     |        |        |        |      |      |



|        |      |    |     |     |        |        |        |      |      |
|--------|------|----|-----|-----|--------|--------|--------|------|------|
| HETATM | 8652 | C1 | PRP | 582 | 55.290 | 23.464 | 24.270 | 1.00 | 0.00 |
| C      |      |    |     |     |        |        |        |      |      |
| HETATM | 8653 | H2 | PRP | 582 | 55.246 | 22.608 | 24.944 | 1.00 | 0.00 |
| H      |      |    |     |     |        |        |        |      |      |
| HETATM | 8654 | H3 | PRP | 582 | 55.224 | 23.182 | 23.219 | 1.00 | 0.00 |
| H      |      |    |     |     |        |        |        |      |      |
| HETATM | 8655 | C2 | PRP | 582 | 56.535 | 24.381 | 24.542 | 1.00 | 0.00 |
| C      |      |    |     |     |        |        |        |      |      |
| HETATM | 8656 | H4 | PRP | 582 | 57.412 | 23.775 | 24.315 | 1.00 | 0.00 |
| H      |      |    |     |     |        |        |        |      |      |
| HETATM | 8657 | O2 | PRP | 582 | 56.516 | 24.861 | 25.879 | 1.00 | 0.00 |
| O      |      |    |     |     |        |        |        |      |      |
| HETATM | 8658 | H5 | PRP | 582 | 55.954 | 25.637 | 25.933 | 1.00 | 0.00 |
| H      |      |    |     |     |        |        |        |      |      |
| HETATM | 8659 | C3 | PRP | 582 | 56.513 | 25.579 | 23.564 | 1.00 | 0.00 |
| C      |      |    |     |     |        |        |        |      |      |
| HETATM | 8660 | H6 | PRP | 582 | 55.691 | 26.281 | 23.702 | 1.00 | 0.00 |
| H      |      |    |     |     |        |        |        |      |      |
| HETATM | 8661 | H7 | PRP | 582 | 57.414 | 26.183 | 23.674 | 1.00 | 0.00 |
| H      |      |    |     |     |        |        |        |      |      |
| HETATM | 8662 | H8 | PRP | 582 | 56.409 | 25.159 | 22.563 | 1.00 | 0.00 |
| H      |      |    |     |     |        |        |        |      |      |
| HETATM | 8663 | O1 | PRP | 583 | 51.098 | 44.581 | 18.067 | 1.00 | 0.00 |
| O      |      |    |     |     |        |        |        |      |      |
| HETATM | 8664 | H1 | PRP | 583 | 50.295 | 44.090 | 17.882 | 1.00 | 0.00 |
| H      |      |    |     |     |        |        |        |      |      |
| HETATM | 8665 | C1 | PRP | 583 | 52.198 | 43.707 | 18.127 | 1.00 | 0.00 |
| C      |      |    |     |     |        |        |        |      |      |
| HETATM | 8666 | H2 | PRP | 583 | 52.090 | 43.068 | 19.003 | 1.00 | 0.00 |
| H      |      |    |     |     |        |        |        |      |      |
| HETATM | 8667 | H3 | PRP | 583 | 52.269 | 43.040 | 17.267 | 1.00 | 0.00 |
| H      |      |    |     |     |        |        |        |      |      |
| HETATM | 8668 | C2 | PRP | 583 | 53.490 | 44.575 | 18.147 | 1.00 | 0.00 |
| C      |      |    |     |     |        |        |        |      |      |
| HETATM | 8669 | H4 | PRP | 583 | 53.380 | 45.324 | 18.932 | 1.00 | 0.00 |
| H      |      |    |     |     |        |        |        |      |      |
| HETATM | 8670 | O2 | PRP | 583 | 53.790 | 45.061 | 16.875 | 1.00 | 0.00 |
| O      |      |    |     |     |        |        |        |      |      |
| HETATM | 8671 | H5 | PRP | 583 | 52.928 | 45.104 | 16.455 | 1.00 | 0.00 |
| H      |      |    |     |     |        |        |        |      |      |
| HETATM | 8672 | C3 | PRP | 583 | 54.619 | 43.735 | 18.598 | 1.00 | 0.00 |
| C      |      |    |     |     |        |        |        |      |      |
| HETATM | 8673 | H6 | PRP | 583 | 55.522 | 44.317 | 18.786 | 1.00 | 0.00 |
| H      |      |    |     |     |        |        |        |      |      |
| HETATM | 8674 | H7 | PRP | 583 | 54.337 | 43.174 | 19.488 | 1.00 | 0.00 |
| H      |      |    |     |     |        |        |        |      |      |
| HETATM | 8675 | H8 | PRP | 583 | 54.815 | 43.057 | 17.768 | 1.00 | 0.00 |
| H      |      |    |     |     |        |        |        |      |      |
| HETATM | 8676 | O1 | PRP | 584 | 50.329 | 22.679 | 33.504 | 1.00 | 0.00 |
| O      |      |    |     |     |        |        |        |      |      |
| HETATM | 8677 | H1 | PRP | 584 | 50.573 | 23.607 | 33.481 | 1.00 | 0.00 |
| H      |      |    |     |     |        |        |        |      |      |
| HETATM | 8678 | C1 | PRP | 584 | 50.554 | 22.241 | 34.785 | 1.00 | 0.00 |
| C      |      |    |     |     |        |        |        |      |      |
| HETATM | 8679 | H2 | PRP | 584 | 51.494 | 21.704 | 34.912 | 1.00 | 0.00 |
| H      |      |    |     |     |        |        |        |      |      |

|        |      |    |     |     |        |        |        |      |      |
|--------|------|----|-----|-----|--------|--------|--------|------|------|
| HETATM | 8680 | H3 | PRP | 584 | 50.443 | 23.085 | 35.466 | 1.00 | 0.00 |
| H      |      |    |     |     |        |        |        |      |      |
| HETATM | 8681 | C2 | PRP | 584 | 49.505 | 21.164 | 35.231 | 1.00 | 0.00 |
| C      |      |    |     |     |        |        |        |      |      |
| HETATM | 8682 | H4 | PRP | 584 | 49.489 | 20.317 | 34.545 | 1.00 | 0.00 |
| H      |      |    |     |     |        |        |        |      |      |
| HETATM | 8683 | O2 | PRP | 584 | 48.274 | 21.837 | 35.324 | 1.00 | 0.00 |
| O      |      |    |     |     |        |        |        |      |      |
| HETATM | 8684 | H5 | PRP | 584 | 48.046 | 22.322 | 34.528 | 1.00 | 0.00 |
| H      |      |    |     |     |        |        |        |      |      |
| HETATM | 8685 | C3 | PRP | 584 | 49.779 | 20.600 | 36.633 | 1.00 | 0.00 |
| C      |      |    |     |     |        |        |        |      |      |
| HETATM | 8686 | H6 | PRP | 584 | 49.064 | 19.874 | 37.019 | 1.00 | 0.00 |
| H      |      |    |     |     |        |        |        |      |      |
| HETATM | 8687 | H7 | PRP | 584 | 50.675 | 19.981 | 36.611 | 1.00 | 0.00 |
| H      |      |    |     |     |        |        |        |      |      |
| HETATM | 8688 | H8 | PRP | 584 | 50.097 | 21.359 | 37.349 | 1.00 | 0.00 |
| H      |      |    |     |     |        |        |        |      |      |
| HETATM | 8689 | O1 | PRP | 585 | 31.199 | 34.701 | 23.945 | 1.00 | 0.00 |
| O      |      |    |     |     |        |        |        |      |      |
| HETATM | 8690 | H1 | PRP | 585 | 31.742 | 35.133 | 23.282 | 1.00 | 0.00 |
| H      |      |    |     |     |        |        |        |      |      |
| HETATM | 8691 | C1 | PRP | 585 | 30.810 | 33.554 | 23.246 | 1.00 | 0.00 |
| C      |      |    |     |     |        |        |        |      |      |
| HETATM | 8692 | H2 | PRP | 585 | 29.870 | 33.185 | 23.657 | 1.00 | 0.00 |
| H      |      |    |     |     |        |        |        |      |      |
| HETATM | 8693 | H3 | PRP | 585 | 30.639 | 33.843 | 22.209 | 1.00 | 0.00 |
| H      |      |    |     |     |        |        |        |      |      |
| HETATM | 8694 | C2 | PRP | 585 | 31.754 | 32.342 | 23.369 | 1.00 | 0.00 |
| C      |      |    |     |     |        |        |        |      |      |
| HETATM | 8695 | H4 | PRP | 585 | 31.389 | 31.506 | 22.772 | 1.00 | 0.00 |
| H      |      |    |     |     |        |        |        |      |      |
| HETATM | 8696 | O2 | PRP | 585 | 31.744 | 31.908 | 24.703 | 1.00 | 0.00 |
| O      |      |    |     |     |        |        |        |      |      |
| HETATM | 8697 | H5 | PRP | 585 | 31.982 | 32.604 | 25.319 | 1.00 | 0.00 |
| H      |      |    |     |     |        |        |        |      |      |
| HETATM | 8698 | C3 | PRP | 585 | 33.220 | 32.674 | 22.983 | 1.00 | 0.00 |
| C      |      |    |     |     |        |        |        |      |      |
| HETATM | 8699 | H6 | PRP | 585 | 33.244 | 32.959 | 21.931 | 1.00 | 0.00 |
| H      |      |    |     |     |        |        |        |      |      |
| HETATM | 8700 | H7 | PRP | 585 | 33.643 | 33.423 | 23.653 | 1.00 | 0.00 |
| H      |      |    |     |     |        |        |        |      |      |
| HETATM | 8701 | H8 | PRP | 585 | 33.768 | 31.742 | 23.119 | 1.00 | 0.00 |
| H      |      |    |     |     |        |        |        |      |      |
| HETATM | 8702 | O1 | PRP | 586 | 54.370 | 29.984 | 36.633 | 1.00 | 0.00 |
| O      |      |    |     |     |        |        |        |      |      |
| HETATM | 8703 | H1 | PRP | 586 | 53.957 | 30.805 | 36.357 | 1.00 | 0.00 |
| H      |      |    |     |     |        |        |        |      |      |
| HETATM | 8704 | C1 | PRP | 586 | 53.914 | 29.921 | 37.957 | 1.00 | 0.00 |
| C      |      |    |     |     |        |        |        |      |      |
| HETATM | 8705 | H2 | PRP | 586 | 54.169 | 28.977 | 38.439 | 1.00 | 0.00 |
| H      |      |    |     |     |        |        |        |      |      |
| HETATM | 8706 | H3 | PRP | 586 | 54.294 | 30.787 | 38.498 | 1.00 | 0.00 |
| H      |      |    |     |     |        |        |        |      |      |
| HETATM | 8707 | C2 | PRP | 586 | 52.357 | 29.766 | 37.966 | 1.00 | 0.00 |
| C      |      |    |     |     |        |        |        |      |      |

|        |      |    |     |     |        |        |        |      |      |
|--------|------|----|-----|-----|--------|--------|--------|------|------|
| HETATM | 8708 | H4 | PRP | 586 | 52.077 | 28.811 | 37.520 | 1.00 | 0.00 |
| H      |      |    |     |     |        |        |        |      |      |
| HETATM | 8709 | O2 | PRP | 586 | 51.797 | 30.774 | 37.103 | 1.00 | 0.00 |
| O      |      |    |     |     |        |        |        |      |      |
| HETATM | 8710 | H5 | PRP | 586 | 50.842 | 30.671 | 37.077 | 1.00 | 0.00 |
| H      |      |    |     |     |        |        |        |      |      |
| HETATM | 8711 | C3 | PRP | 586 | 52.003 | 29.810 | 39.502 | 1.00 | 0.00 |
| C      |      |    |     |     |        |        |        |      |      |
| HETATM | 8712 | H6 | PRP | 586 | 50.950 | 29.558 | 39.622 | 1.00 | 0.00 |
| H      |      |    |     |     |        |        |        |      |      |
| HETATM | 8713 | H7 | PRP | 586 | 52.614 | 29.114 | 40.076 | 1.00 | 0.00 |
| H      |      |    |     |     |        |        |        |      |      |
| HETATM | 8714 | H8 | PRP | 586 | 52.242 | 30.780 | 39.939 | 1.00 | 0.00 |
| H      |      |    |     |     |        |        |        |      |      |
| HETATM | 8715 | O1 | PRP | 587 | 43.386 | 47.488 | 24.583 | 1.00 | 0.00 |
| O      |      |    |     |     |        |        |        |      |      |
| HETATM | 8716 | H1 | PRP | 587 | 43.112 | 48.335 | 24.222 | 1.00 | 0.00 |
| H      |      |    |     |     |        |        |        |      |      |
| HETATM | 8717 | C1 | PRP | 587 | 43.564 | 46.547 | 23.479 | 1.00 | 0.00 |
| C      |      |    |     |     |        |        |        |      |      |
| HETATM | 8718 | H2 | PRP | 587 | 42.586 | 46.467 | 23.004 | 1.00 | 0.00 |
| H      |      |    |     |     |        |        |        |      |      |
| HETATM | 8719 | H3 | PRP | 587 | 44.256 | 46.945 | 22.737 | 1.00 | 0.00 |
| H      |      |    |     |     |        |        |        |      |      |
| HETATM | 8720 | C2 | PRP | 587 | 43.994 | 45.130 | 23.906 | 1.00 | 0.00 |
| C      |      |    |     |     |        |        |        |      |      |
| HETATM | 8721 | H4 | PRP | 587 | 43.343 | 44.835 | 24.729 | 1.00 | 0.00 |
| H      |      |    |     |     |        |        |        |      |      |
| HETATM | 8722 | O2 | PRP | 587 | 45.317 | 45.028 | 24.301 | 1.00 | 0.00 |
| O      |      |    |     |     |        |        |        |      |      |
| HETATM | 8723 | H5 | PRP | 587 | 45.866 | 44.772 | 23.556 | 1.00 | 0.00 |
| H      |      |    |     |     |        |        |        |      |      |
| HETATM | 8724 | C3 | PRP | 587 | 43.852 | 44.056 | 22.847 | 1.00 | 0.00 |
| C      |      |    |     |     |        |        |        |      |      |
| HETATM | 8725 | H6 | PRP | 587 | 44.486 | 44.250 | 21.983 | 1.00 | 0.00 |
| H      |      |    |     |     |        |        |        |      |      |
| HETATM | 8726 | H7 | PRP | 587 | 44.087 | 43.107 | 23.330 | 1.00 | 0.00 |
| H      |      |    |     |     |        |        |        |      |      |
| HETATM | 8727 | H8 | PRP | 587 | 42.771 | 44.037 | 22.707 | 1.00 | 0.00 |
| H      |      |    |     |     |        |        |        |      |      |
| HETATM | 8728 | O1 | PRP | 588 | 35.516 | 31.133 | 28.737 | 1.00 | 0.00 |
| O      |      |    |     |     |        |        |        |      |      |
| HETATM | 8729 | H1 | PRP | 588 | 34.797 | 30.653 | 29.153 | 1.00 | 0.00 |
| H      |      |    |     |     |        |        |        |      |      |
| HETATM | 8730 | C1 | PRP | 588 | 35.483 | 30.853 | 27.361 | 1.00 | 0.00 |
| C      |      |    |     |     |        |        |        |      |      |
| HETATM | 8731 | H2 | PRP | 588 | 34.443 | 30.893 | 27.038 | 1.00 | 0.00 |
| H      |      |    |     |     |        |        |        |      |      |
| HETATM | 8732 | H3 | PRP | 588 | 36.117 | 31.600 | 26.884 | 1.00 | 0.00 |
| H      |      |    |     |     |        |        |        |      |      |
| HETATM | 8733 | C2 | PRP | 588 | 35.973 | 29.467 | 27.113 | 1.00 | 0.00 |
| C      |      |    |     |     |        |        |        |      |      |
| HETATM | 8734 | H4 | PRP | 588 | 36.146 | 29.479 | 26.037 | 1.00 | 0.00 |
| H      |      |    |     |     |        |        |        |      |      |
| HETATM | 8735 | O2 | PRP | 588 | 34.938 | 28.584 | 27.373 | 1.00 | 0.00 |
| O      |      |    |     |     |        |        |        |      |      |

|        |      |    |     |     |        |        |        |      |      |
|--------|------|----|-----|-----|--------|--------|--------|------|------|
| HETATM | 8736 | H5 | PRP | 588 | 35.175 | 28.044 | 28.131 | 1.00 | 0.00 |
| H      |      |    |     |     |        |        |        |      |      |
| HETATM | 8737 | C3 | PRP | 588 | 37.309 | 29.029 | 27.696 | 1.00 | 0.00 |
| C      |      |    |     |     |        |        |        |      |      |
| HETATM | 8738 | H6 | PRP | 588 | 38.055 | 29.756 | 27.375 | 1.00 | 0.00 |
| H      |      |    |     |     |        |        |        |      |      |
| HETATM | 8739 | H7 | PRP | 588 | 37.228 | 28.798 | 28.758 | 1.00 | 0.00 |
| H      |      |    |     |     |        |        |        |      |      |
| HETATM | 8740 | H8 | PRP | 588 | 37.727 | 28.126 | 27.252 | 1.00 | 0.00 |
| H      |      |    |     |     |        |        |        |      |      |
| HETATM | 8741 | O1 | PRP | 589 | 46.836 | 33.311 | 30.688 | 1.00 | 0.00 |
| O      |      |    |     |     |        |        |        |      |      |
| HETATM | 8742 | H1 | PRP | 589 | 46.737 | 34.097 | 30.145 | 1.00 | 0.00 |
| H      |      |    |     |     |        |        |        |      |      |
| HETATM | 8743 | C1 | PRP | 589 | 46.505 | 33.585 | 32.083 | 1.00 | 0.00 |
| C      |      |    |     |     |        |        |        |      |      |
| HETATM | 8744 | H2 | PRP | 589 | 45.662 | 34.273 | 32.148 | 1.00 | 0.00 |
| H      |      |    |     |     |        |        |        |      |      |
| HETATM | 8745 | H3 | PRP | 589 | 46.213 | 32.642 | 32.546 | 1.00 | 0.00 |
| H      |      |    |     |     |        |        |        |      |      |
| HETATM | 8746 | C2 | PRP | 589 | 47.579 | 34.252 | 32.927 | 1.00 | 0.00 |
| C      |      |    |     |     |        |        |        |      |      |
| HETATM | 8747 | H4 | PRP | 589 | 47.208 | 34.576 | 33.899 | 1.00 | 0.00 |
| H      |      |    |     |     |        |        |        |      |      |
| HETATM | 8748 | O2 | PRP | 589 | 48.101 | 35.396 | 32.144 | 1.00 | 0.00 |
| O      |      |    |     |     |        |        |        |      |      |
| HETATM | 8749 | H5 | PRP | 589 | 48.548 | 34.982 | 31.402 | 1.00 | 0.00 |
| H      |      |    |     |     |        |        |        |      |      |
| HETATM | 8750 | C3 | PRP | 589 | 48.807 | 33.346 | 33.145 | 1.00 | 0.00 |
| C      |      |    |     |     |        |        |        |      |      |
| HETATM | 8751 | H6 | PRP | 589 | 49.436 | 33.174 | 32.271 | 1.00 | 0.00 |
| H      |      |    |     |     |        |        |        |      |      |
| HETATM | 8752 | H7 | PRP | 589 | 49.550 | 33.812 | 33.793 | 1.00 | 0.00 |
| H      |      |    |     |     |        |        |        |      |      |
| HETATM | 8753 | H8 | PRP | 589 | 48.503 | 32.393 | 33.576 | 1.00 | 0.00 |
| H      |      |    |     |     |        |        |        |      |      |
| HETATM | 8754 | O1 | PRP | 590 | 37.231 | 38.389 | 25.147 | 1.00 | 0.00 |
| O      |      |    |     |     |        |        |        |      |      |
| HETATM | 8755 | H1 | PRP | 590 | 37.290 | 39.345 | 25.215 | 1.00 | 0.00 |
| H      |      |    |     |     |        |        |        |      |      |
| HETATM | 8756 | C1 | PRP | 590 | 35.956 | 38.007 | 25.659 | 1.00 | 0.00 |
| C      |      |    |     |     |        |        |        |      |      |
| HETATM | 8757 | H2 | PRP | 590 | 35.896 | 38.495 | 26.632 | 1.00 | 0.00 |
| H      |      |    |     |     |        |        |        |      |      |
| HETATM | 8758 | H3 | PRP | 590 | 35.229 | 38.385 | 24.940 | 1.00 | 0.00 |
| H      |      |    |     |     |        |        |        |      |      |
| HETATM | 8759 | C2 | PRP | 590 | 35.801 | 36.461 | 25.663 | 1.00 | 0.00 |
| C      |      |    |     |     |        |        |        |      |      |
| HETATM | 8760 | H4 | PRP | 590 | 36.561 | 36.013 | 26.303 | 1.00 | 0.00 |
| H      |      |    |     |     |        |        |        |      |      |
| HETATM | 8761 | O2 | PRP | 590 | 36.025 | 36.028 | 24.334 | 1.00 | 0.00 |
| O      |      |    |     |     |        |        |        |      |      |
| HETATM | 8762 | H5 | PRP | 590 | 36.433 | 36.745 | 23.844 | 1.00 | 0.00 |
| H      |      |    |     |     |        |        |        |      |      |
| HETATM | 8763 | C3 | PRP | 590 | 34.425 | 36.007 | 26.158 | 1.00 | 0.00 |
| C      |      |    |     |     |        |        |        |      |      |

|        |      |    |     |     |        |        |        |      |      |
|--------|------|----|-----|-----|--------|--------|--------|------|------|
| HETATM | 8764 | H6 | PRP | 590 | 34.198 | 34.986 | 25.852 | 1.00 | 0.00 |
| H      |      |    |     |     |        |        |        |      |      |
| HETATM | 8765 | H7 | PRP | 590 | 34.371 | 36.269 | 27.215 | 1.00 | 0.00 |
| H      |      |    |     |     |        |        |        |      |      |
| HETATM | 8766 | H8 | PRP | 590 | 33.667 | 36.533 | 25.578 | 1.00 | 0.00 |
| H      |      |    |     |     |        |        |        |      |      |
| HETATM | 8767 | O1 | PRP | 591 | 46.400 | 23.091 | 22.297 | 1.00 | 0.00 |
| O      |      |    |     |     |        |        |        |      |      |
| HETATM | 8768 | H1 | PRP | 591 | 46.646 | 22.786 | 23.173 | 1.00 | 0.00 |
| H      |      |    |     |     |        |        |        |      |      |
| HETATM | 8769 | C1 | PRP | 591 | 45.887 | 24.342 | 22.567 | 1.00 | 0.00 |
| C      |      |    |     |     |        |        |        |      |      |
| HETATM | 8770 | H2 | PRP | 591 | 45.717 | 24.858 | 21.621 | 1.00 | 0.00 |
| H      |      |    |     |     |        |        |        |      |      |
| HETATM | 8771 | H3 | PRP | 591 | 44.937 | 24.221 | 23.088 | 1.00 | 0.00 |
| H      |      |    |     |     |        |        |        |      |      |
| HETATM | 8772 | C2 | PRP | 591 | 46.873 | 25.224 | 23.323 | 1.00 | 0.00 |
| C      |      |    |     |     |        |        |        |      |      |
| HETATM | 8773 | H4 | PRP | 591 | 47.759 | 25.427 | 22.721 | 1.00 | 0.00 |
| H      |      |    |     |     |        |        |        |      |      |
| HETATM | 8774 | O2 | PRP | 591 | 47.284 | 24.671 | 24.597 | 1.00 | 0.00 |
| O      |      |    |     |     |        |        |        |      |      |
| HETATM | 8775 | H5 | PRP | 591 | 46.947 | 25.273 | 25.265 | 1.00 | 0.00 |
| H      |      |    |     |     |        |        |        |      |      |
| HETATM | 8776 | C3 | PRP | 591 | 46.315 | 26.621 | 23.617 | 1.00 | 0.00 |
| C      |      |    |     |     |        |        |        |      |      |
| HETATM | 8777 | H6 | PRP | 591 | 45.931 | 27.108 | 22.721 | 1.00 | 0.00 |
| H      |      |    |     |     |        |        |        |      |      |
| HETATM | 8778 | H7 | PRP | 591 | 45.391 | 26.599 | 24.195 | 1.00 | 0.00 |
| H      |      |    |     |     |        |        |        |      |      |
| HETATM | 8779 | H8 | PRP | 591 | 47.043 | 27.299 | 24.063 | 1.00 | 0.00 |
| H      |      |    |     |     |        |        |        |      |      |
| HETATM | 8780 | O1 | PRP | 592 | 36.621 | 30.948 | 16.631 | 1.00 | 0.00 |
| O      |      |    |     |     |        |        |        |      |      |
| HETATM | 8781 | H1 | PRP | 592 | 35.806 | 31.008 | 16.126 | 1.00 | 0.00 |
| H      |      |    |     |     |        |        |        |      |      |
| HETATM | 8782 | C1 | PRP | 592 | 36.377 | 31.091 | 17.998 | 1.00 | 0.00 |
| C      |      |    |     |     |        |        |        |      |      |
| HETATM | 8783 | H2 | PRP | 592 | 36.779 | 32.036 | 18.362 | 1.00 | 0.00 |
| H      |      |    |     |     |        |        |        |      |      |
| HETATM | 8784 | H3 | PRP | 592 | 35.337 | 30.986 | 18.308 | 1.00 | 0.00 |
| H      |      |    |     |     |        |        |        |      |      |
| HETATM | 8785 | C2 | PRP | 592 | 37.185 | 30.130 | 18.751 | 1.00 | 0.00 |
| C      |      |    |     |     |        |        |        |      |      |
| HETATM | 8786 | H4 | PRP | 592 | 38.175 | 30.047 | 18.303 | 1.00 | 0.00 |
| H      |      |    |     |     |        |        |        |      |      |
| HETATM | 8787 | O2 | PRP | 592 | 36.570 | 28.820 | 18.766 | 1.00 | 0.00 |
| O      |      |    |     |     |        |        |        |      |      |
| HETATM | 8788 | H5 | PRP | 592 | 37.270 | 28.203 | 18.990 | 1.00 | 0.00 |
| H      |      |    |     |     |        |        |        |      |      |
| HETATM | 8789 | C3 | PRP | 592 | 37.143 | 30.577 | 20.252 | 1.00 | 0.00 |
| C      |      |    |     |     |        |        |        |      |      |
| HETATM | 8790 | H6 | PRP | 592 | 37.982 | 30.066 | 20.725 | 1.00 | 0.00 |
| H      |      |    |     |     |        |        |        |      |      |
| HETATM | 8791 | H7 | PRP | 592 | 37.298 | 31.646 | 20.396 | 1.00 | 0.00 |
| H      |      |    |     |     |        |        |        |      |      |

|        |      |    |     |     |        |        |        |      |      |
|--------|------|----|-----|-----|--------|--------|--------|------|------|
| HETATM | 8792 | H8 | PRP | 592 | 36.217 | 30.275 | 20.742 | 1.00 | 0.00 |
| H      |      |    |     |     |        |        |        |      |      |
| HETATM | 8793 | O1 | PRP | 593 | 31.271 | 36.393 | 49.121 | 1.00 | 0.00 |
| O      |      |    |     |     |        |        |        |      |      |
| HETATM | 8794 | H1 | PRP | 593 | 30.571 | 36.745 | 48.567 | 1.00 | 0.00 |
| H      |      |    |     |     |        |        |        |      |      |
| HETATM | 8795 | C1 | PRP | 593 | 31.617 | 35.018 | 48.841 | 1.00 | 0.00 |
| C      |      |    |     |     |        |        |        |      |      |
| HETATM | 8796 | H2 | PRP | 593 | 32.341 | 34.737 | 49.605 | 1.00 | 0.00 |
| H      |      |    |     |     |        |        |        |      |      |
| HETATM | 8797 | H3 | PRP | 593 | 30.688 | 34.448 | 48.865 | 1.00 | 0.00 |
| H      |      |    |     |     |        |        |        |      |      |
| HETATM | 8798 | C2 | PRP | 593 | 32.395 | 34.628 | 47.610 | 1.00 | 0.00 |
| C      |      |    |     |     |        |        |        |      |      |
| HETATM | 8799 | H4 | PRP | 593 | 32.570 | 33.577 | 47.381 | 1.00 | 0.00 |
| H      |      |    |     |     |        |        |        |      |      |
| HETATM | 8800 | O2 | PRP | 593 | 33.693 | 35.192 | 47.809 | 1.00 | 0.00 |
| O      |      |    |     |     |        |        |        |      |      |
| HETATM | 8801 | H5 | PRP | 593 | 33.589 | 36.064 | 48.197 | 1.00 | 0.00 |
| H      |      |    |     |     |        |        |        |      |      |
| HETATM | 8802 | C3 | PRP | 593 | 31.747 | 35.175 | 46.417 | 1.00 | 0.00 |
| C      |      |    |     |     |        |        |        |      |      |
| HETATM | 8803 | H6 | PRP | 593 | 32.400 | 34.887 | 45.594 | 1.00 | 0.00 |
| H      |      |    |     |     |        |        |        |      |      |
| HETATM | 8804 | H7 | PRP | 593 | 30.729 | 34.785 | 46.432 | 1.00 | 0.00 |
| H      |      |    |     |     |        |        |        |      |      |
| HETATM | 8805 | H8 | PRP | 593 | 31.785 | 36.257 | 46.287 | 1.00 | 0.00 |
| H      |      |    |     |     |        |        |        |      |      |
| HETATM | 8806 | O1 | PRP | 594 | 34.854 | 53.942 | 25.026 | 1.00 | 0.00 |
| O      |      |    |     |     |        |        |        |      |      |
| HETATM | 8807 | H1 | PRP | 594 | 34.109 | 53.596 | 24.529 | 1.00 | 0.00 |
| H      |      |    |     |     |        |        |        |      |      |
| HETATM | 8808 | C1 | PRP | 594 | 36.013 | 53.599 | 24.296 | 1.00 | 0.00 |
| C      |      |    |     |     |        |        |        |      |      |
| HETATM | 8809 | H2 | PRP | 594 | 36.739 | 54.266 | 24.761 | 1.00 | 0.00 |
| H      |      |    |     |     |        |        |        |      |      |
| HETATM | 8810 | H3 | PRP | 594 | 36.361 | 52.574 | 24.427 | 1.00 | 0.00 |
| H      |      |    |     |     |        |        |        |      |      |
| HETATM | 8811 | C2 | PRP | 594 | 35.805 | 53.743 | 22.784 | 1.00 | 0.00 |
| C      |      |    |     |     |        |        |        |      |      |
| HETATM | 8812 | H4 | PRP | 594 | 35.654 | 54.806 | 22.596 | 1.00 | 0.00 |
| H      |      |    |     |     |        |        |        |      |      |
| HETATM | 8813 | O2 | PRP | 594 | 34.687 | 53.039 | 22.365 | 1.00 | 0.00 |
| O      |      |    |     |     |        |        |        |      |      |
| HETATM | 8814 | H5 | PRP | 594 | 34.661 | 52.794 | 21.438 | 1.00 | 0.00 |
| H      |      |    |     |     |        |        |        |      |      |
| HETATM | 8815 | C3 | PRP | 594 | 36.995 | 53.182 | 21.997 | 1.00 | 0.00 |
| C      |      |    |     |     |        |        |        |      |      |
| HETATM | 8816 | H6 | PRP | 594 | 37.842 | 53.841 | 22.186 | 1.00 | 0.00 |
| H      |      |    |     |     |        |        |        |      |      |
| HETATM | 8817 | H7 | PRP | 594 | 37.244 | 52.144 | 22.219 | 1.00 | 0.00 |
| H      |      |    |     |     |        |        |        |      |      |
| HETATM | 8818 | H8 | PRP | 594 | 36.752 | 53.308 | 20.942 | 1.00 | 0.00 |
| H      |      |    |     |     |        |        |        |      |      |
| HETATM | 8819 | O1 | PRP | 595 | 40.485 | 48.922 | 34.909 | 1.00 | 0.00 |
| O      |      |    |     |     |        |        |        |      |      |

|        |      |    |     |     |        |        |        |      |      |
|--------|------|----|-----|-----|--------|--------|--------|------|------|
| HETATM | 8820 | H1 | PRP | 595 | 40.103 | 48.354 | 35.581 | 1.00 | 0.00 |
| H      |      |    |     |     |        |        |        |      |      |
| HETATM | 8821 | C1 | PRP | 595 | 41.689 | 48.335 | 34.377 | 1.00 | 0.00 |
| C      |      |    |     |     |        |        |        |      |      |
| HETATM | 8822 | H2 | PRP | 595 | 41.467 | 47.408 | 33.849 | 1.00 | 0.00 |
| H      |      |    |     |     |        |        |        |      |      |
| HETATM | 8823 | H3 | PRP | 595 | 42.082 | 48.986 | 33.596 | 1.00 | 0.00 |
| H      |      |    |     |     |        |        |        |      |      |
| HETATM | 8824 | C2 | PRP | 595 | 42.728 | 48.151 | 35.507 | 1.00 | 0.00 |
| C      |      |    |     |     |        |        |        |      |      |
| HETATM | 8825 | H4 | PRP | 595 | 42.229 | 47.715 | 36.372 | 1.00 | 0.00 |
| H      |      |    |     |     |        |        |        |      |      |
| HETATM | 8826 | O2 | PRP | 595 | 43.123 | 49.383 | 35.959 | 1.00 | 0.00 |
| O      |      |    |     |     |        |        |        |      |      |
| HETATM | 8827 | H5 | PRP | 595 | 43.430 | 49.947 | 35.245 | 1.00 | 0.00 |
| H      |      |    |     |     |        |        |        |      |      |
| HETATM | 8828 | C3 | PRP | 595 | 43.780 | 47.216 | 34.871 | 1.00 | 0.00 |
| C      |      |    |     |     |        |        |        |      |      |
| HETATM | 8829 | H6 | PRP | 595 | 43.358 | 46.212 | 34.918 | 1.00 | 0.00 |
| H      |      |    |     |     |        |        |        |      |      |
| HETATM | 8830 | H7 | PRP | 595 | 43.914 | 47.564 | 33.846 | 1.00 | 0.00 |
| H      |      |    |     |     |        |        |        |      |      |
| HETATM | 8831 | H8 | PRP | 595 | 44.676 | 47.332 | 35.480 | 1.00 | 0.00 |
| H      |      |    |     |     |        |        |        |      |      |
| HETATM | 8832 | O1 | PRP | 596 | 43.835 | 39.790 | 29.027 | 1.00 | 0.00 |
| O      |      |    |     |     |        |        |        |      |      |
| HETATM | 8833 | H1 | PRP | 596 | 44.613 | 39.505 | 29.513 | 1.00 | 0.00 |
| H      |      |    |     |     |        |        |        |      |      |
| HETATM | 8834 | C1 | PRP | 596 | 43.413 | 41.024 | 29.528 | 1.00 | 0.00 |
| C      |      |    |     |     |        |        |        |      |      |
| HETATM | 8835 | H2 | PRP | 596 | 42.430 | 40.836 | 29.961 | 1.00 | 0.00 |
| H      |      |    |     |     |        |        |        |      |      |
| HETATM | 8836 | H3 | PRP | 596 | 44.127 | 41.491 | 30.206 | 1.00 | 0.00 |
| H      |      |    |     |     |        |        |        |      |      |
| HETATM | 8837 | C2 | PRP | 596 | 43.194 | 41.971 | 28.333 | 1.00 | 0.00 |
| C      |      |    |     |     |        |        |        |      |      |
| HETATM | 8838 | H4 | PRP | 596 | 42.537 | 41.490 | 27.608 | 1.00 | 0.00 |
| H      |      |    |     |     |        |        |        |      |      |
| HETATM | 8839 | O2 | PRP | 596 | 44.485 | 42.284 | 27.756 | 1.00 | 0.00 |
| O      |      |    |     |     |        |        |        |      |      |
| HETATM | 8840 | H5 | PRP | 596 | 44.697 | 43.219 | 27.802 | 1.00 | 0.00 |
| H      |      |    |     |     |        |        |        |      |      |
| HETATM | 8841 | C3 | PRP | 596 | 42.442 | 43.198 | 28.806 | 1.00 | 0.00 |
| C      |      |    |     |     |        |        |        |      |      |
| HETATM | 8842 | H6 | PRP | 596 | 42.902 | 43.809 | 29.583 | 1.00 | 0.00 |
| H      |      |    |     |     |        |        |        |      |      |
| HETATM | 8843 | H7 | PRP | 596 | 42.222 | 43.951 | 28.049 | 1.00 | 0.00 |
| H      |      |    |     |     |        |        |        |      |      |
| HETATM | 8844 | H8 | PRP | 596 | 41.464 | 42.861 | 29.152 | 1.00 | 0.00 |
| H      |      |    |     |     |        |        |        |      |      |
| HETATM | 8845 | O1 | PRP | 597 | 28.429 | 44.724 | 34.200 | 1.00 | 0.00 |
| O      |      |    |     |     |        |        |        |      |      |
| HETATM | 8846 | H1 | PRP | 597 | 28.712 | 44.987 | 35.079 | 1.00 | 0.00 |
| H      |      |    |     |     |        |        |        |      |      |
| HETATM | 8847 | C1 | PRP | 597 | 27.616 | 45.651 | 33.549 | 1.00 | 0.00 |
| C      |      |    |     |     |        |        |        |      |      |

|        |      |    |     |     |        |        |        |      |      |
|--------|------|----|-----|-----|--------|--------|--------|------|------|
| HETATM | 8848 | H2 | PRP | 597 | 26.575 | 45.385 | 33.734 | 1.00 | 0.00 |
| H      |      |    |     |     |        |        |        |      |      |
| HETATM | 8849 | H3 | PRP | 597 | 27.895 | 46.651 | 33.880 | 1.00 | 0.00 |
| H      |      |    |     |     |        |        |        |      |      |
| HETATM | 8850 | C2 | PRP | 597 | 27.849 | 45.533 | 32.032 | 1.00 | 0.00 |
| C      |      |    |     |     |        |        |        |      |      |
| HETATM | 8851 | H4 | PRP | 597 | 27.770 | 44.500 | 31.695 | 1.00 | 0.00 |
| H      |      |    |     |     |        |        |        |      |      |
| HETATM | 8852 | O2 | PRP | 597 | 29.096 | 46.081 | 31.687 | 1.00 | 0.00 |
| O      |      |    |     |     |        |        |        |      |      |
| HETATM | 8853 | H5 | PRP | 597 | 29.798 | 45.685 | 32.209 | 1.00 | 0.00 |
| H      |      |    |     |     |        |        |        |      |      |
| HETATM | 8854 | C3 | PRP | 597 | 26.658 | 46.236 | 31.419 | 1.00 | 0.00 |
| C      |      |    |     |     |        |        |        |      |      |
| HETATM | 8855 | H6 | PRP | 597 | 27.054 | 46.984 | 30.732 | 1.00 | 0.00 |
| H      |      |    |     |     |        |        |        |      |      |
| HETATM | 8856 | H7 | PRP | 597 | 26.084 | 45.510 | 30.843 | 1.00 | 0.00 |
| H      |      |    |     |     |        |        |        |      |      |
| HETATM | 8857 | H8 | PRP | 597 | 26.014 | 46.751 | 32.131 | 1.00 | 0.00 |
| H      |      |    |     |     |        |        |        |      |      |
| HETATM | 8858 | O1 | PRP | 598 | 23.721 | 57.814 | 29.582 | 1.00 | 0.00 |
| O      |      |    |     |     |        |        |        |      |      |
| HETATM | 8859 | H1 | PRP | 598 | 24.164 | 58.653 | 29.436 | 1.00 | 0.00 |
| H      |      |    |     |     |        |        |        |      |      |
| HETATM | 8860 | C1 | PRP | 598 | 22.663 | 57.886 | 30.508 | 1.00 | 0.00 |
| C      |      |    |     |     |        |        |        |      |      |
| HETATM | 8861 | H2 | PRP | 598 | 21.864 | 58.460 | 30.038 | 1.00 | 0.00 |
| H      |      |    |     |     |        |        |        |      |      |
| HETATM | 8862 | H3 | PRP | 598 | 22.227 | 56.892 | 30.610 | 1.00 | 0.00 |
| H      |      |    |     |     |        |        |        |      |      |
| HETATM | 8863 | C2 | PRP | 598 | 23.045 | 58.461 | 31.836 | 1.00 | 0.00 |
| C      |      |    |     |     |        |        |        |      |      |
| HETATM | 8864 | H4 | PRP | 598 | 23.606 | 59.391 | 31.746 | 1.00 | 0.00 |
| H      |      |    |     |     |        |        |        |      |      |
| HETATM | 8865 | O2 | PRP | 598 | 23.943 | 57.513 | 32.396 | 1.00 | 0.00 |
| O      |      |    |     |     |        |        |        |      |      |
| HETATM | 8866 | H5 | PRP | 598 | 24.448 | 57.113 | 31.684 | 1.00 | 0.00 |
| H      |      |    |     |     |        |        |        |      |      |
| HETATM | 8867 | C3 | PRP | 598 | 21.908 | 58.716 | 32.693 | 1.00 | 0.00 |
| C      |      |    |     |     |        |        |        |      |      |
| HETATM | 8868 | H6 | PRP | 598 | 21.008 | 59.137 | 32.245 | 1.00 | 0.00 |
| H      |      |    |     |     |        |        |        |      |      |
| HETATM | 8869 | H7 | PRP | 598 | 21.640 | 57.808 | 33.234 | 1.00 | 0.00 |
| H      |      |    |     |     |        |        |        |      |      |
| HETATM | 8870 | H8 | PRP | 598 | 22.183 | 59.384 | 33.510 | 1.00 | 0.00 |
| H      |      |    |     |     |        |        |        |      |      |
| HETATM | 8871 | O1 | PRP | 599 | 24.907 | 50.224 | 31.273 | 1.00 | 0.00 |
| O      |      |    |     |     |        |        |        |      |      |
| HETATM | 8872 | H1 | PRP | 599 | 25.829 | 49.956 | 31.285 | 1.00 | 0.00 |
| H      |      |    |     |     |        |        |        |      |      |
| HETATM | 8873 | C1 | PRP | 599 | 24.321 | 49.017 | 30.797 | 1.00 | 0.00 |
| C      |      |    |     |     |        |        |        |      |      |
| HETATM | 8874 | H2 | PRP | 599 | 24.030 | 49.059 | 29.748 | 1.00 | 0.00 |
| H      |      |    |     |     |        |        |        |      |      |
| HETATM | 8875 | H3 | PRP | 599 | 25.142 | 48.301 | 30.744 | 1.00 | 0.00 |
| H      |      |    |     |     |        |        |        |      |      |



|        |      |    |     |     |        |        |        |      |      |
|--------|------|----|-----|-----|--------|--------|--------|------|------|
| HETATM | 8876 | C2 | PRP | 599 | 23.161 | 48.506 | 31.650 | 1.00 | 0.00 |
| C      |      |    |     |     |        |        |        |      |      |
| HETATM | 8877 | H4 | PRP | 599 | 22.330 | 49.211 | 31.663 | 1.00 | 0.00 |
| H      |      |    |     |     |        |        |        |      |      |
| HETATM | 8878 | O2 | PRP | 599 | 23.503 | 48.335 | 33.005 | 1.00 | 0.00 |
| O      |      |    |     |     |        |        |        |      |      |
| HETATM | 8879 | H5 | PRP | 599 | 23.828 | 49.136 | 33.423 | 1.00 | 0.00 |
| H      |      |    |     |     |        |        |        |      |      |
| HETATM | 8880 | C3 | PRP | 599 | 22.635 | 47.232 | 31.013 | 1.00 | 0.00 |
| C      |      |    |     |     |        |        |        |      |      |
| HETATM | 8881 | H6 | PRP | 599 | 23.416 | 46.476 | 30.933 | 1.00 | 0.00 |
| H      |      |    |     |     |        |        |        |      |      |
| HETATM | 8882 | H7 | PRP | 599 | 21.747 | 46.958 | 31.582 | 1.00 | 0.00 |
| H      |      |    |     |     |        |        |        |      |      |
| HETATM | 8883 | H8 | PRP | 599 | 22.275 | 47.463 | 30.011 | 1.00 | 0.00 |
| H      |      |    |     |     |        |        |        |      |      |
| HETATM | 8884 | O1 | PRP | 600 | 31.878 | 59.088 | 26.108 | 1.00 | 0.00 |
| O      |      |    |     |     |        |        |        |      |      |
| HETATM | 8885 | H1 | PRP | 600 | 31.443 | 58.832 | 25.291 | 1.00 | 0.00 |
| H      |      |    |     |     |        |        |        |      |      |
| HETATM | 8886 | C1 | PRP | 600 | 31.731 | 58.178 | 27.180 | 1.00 | 0.00 |
| C      |      |    |     |     |        |        |        |      |      |
| HETATM | 8887 | H2 | PRP | 600 | 30.812 | 58.478 | 27.685 | 1.00 | 0.00 |
| H      |      |    |     |     |        |        |        |      |      |
| HETATM | 8888 | H3 | PRP | 600 | 31.709 | 57.149 | 26.820 | 1.00 | 0.00 |
| H      |      |    |     |     |        |        |        |      |      |
| HETATM | 8889 | C2 | PRP | 600 | 32.895 | 58.394 | 28.135 | 1.00 | 0.00 |
| C      |      |    |     |     |        |        |        |      |      |
| HETATM | 8890 | H4 | PRP | 600 | 32.951 | 59.475 | 28.265 | 1.00 | 0.00 |
| H      |      |    |     |     |        |        |        |      |      |
| HETATM | 8891 | O2 | PRP | 600 | 34.136 | 58.068 | 27.557 | 1.00 | 0.00 |
| O      |      |    |     |     |        |        |        |      |      |
| HETATM | 8892 | H5 | PRP | 600 | 33.959 | 58.070 | 26.614 | 1.00 | 0.00 |
| H      |      |    |     |     |        |        |        |      |      |
| HETATM | 8893 | C3 | PRP | 600 | 32.905 | 57.884 | 29.570 | 1.00 | 0.00 |
| C      |      |    |     |     |        |        |        |      |      |
| HETATM | 8894 | H6 | PRP | 600 | 33.908 | 57.640 | 29.921 | 1.00 | 0.00 |
| H      |      |    |     |     |        |        |        |      |      |
| HETATM | 8895 | H7 | PRP | 600 | 32.391 | 58.583 | 30.229 | 1.00 | 0.00 |
| H      |      |    |     |     |        |        |        |      |      |
| HETATM | 8896 | H8 | PRP | 600 | 32.199 | 57.057 | 29.491 | 1.00 | 0.00 |
| H      |      |    |     |     |        |        |        |      |      |
| HETATM | 8897 | O1 | PRP | 601 | 34.977 | 35.443 | 40.114 | 1.00 | 0.00 |
| O      |      |    |     |     |        |        |        |      |      |
| HETATM | 8898 | H1 | PRP | 601 | 35.648 | 34.882 | 39.718 | 1.00 | 0.00 |
| H      |      |    |     |     |        |        |        |      |      |
| HETATM | 8899 | C1 | PRP | 601 | 33.786 | 35.843 | 39.443 | 1.00 | 0.00 |
| C      |      |    |     |     |        |        |        |      |      |
| HETATM | 8900 | H2 | PRP | 601 | 34.131 | 36.353 | 38.543 | 1.00 | 0.00 |
| H      |      |    |     |     |        |        |        |      |      |
| HETATM | 8901 | H3 | PRP | 601 | 33.192 | 34.979 | 39.146 | 1.00 | 0.00 |
| H      |      |    |     |     |        |        |        |      |      |
| HETATM | 8902 | C2 | PRP | 601 | 32.993 | 36.748 | 40.405 | 1.00 | 0.00 |
| C      |      |    |     |     |        |        |        |      |      |
| HETATM | 8903 | H4 | PRP | 601 | 32.142 | 37.119 | 39.834 | 1.00 | 0.00 |
| H      |      |    |     |     |        |        |        |      |      |

|        |      |    |     |     |        |        |        |      |      |
|--------|------|----|-----|-----|--------|--------|--------|------|------|
| HETATM | 8904 | O2 | PRP | 601 | 33.655 | 37.898 | 40.891 | 1.00 | 0.00 |
| O      |      |    |     |     |        |        |        |      |      |
| HETATM | 8905 | H5 | PRP | 601 | 34.586 | 37.677 | 40.823 | 1.00 | 0.00 |
| H      |      |    |     |     |        |        |        |      |      |
| HETATM | 8906 | C3 | PRP | 601 | 32.477 | 36.019 | 41.645 | 1.00 | 0.00 |
| C      |      |    |     |     |        |        |        |      |      |
| HETATM | 8907 | H6 | PRP | 601 | 31.856 | 36.659 | 42.272 | 1.00 | 0.00 |
| H      |      |    |     |     |        |        |        |      |      |
| HETATM | 8908 | H7 | PRP | 601 | 31.848 | 35.221 | 41.250 | 1.00 | 0.00 |
| H      |      |    |     |     |        |        |        |      |      |
| HETATM | 8909 | H8 | PRP | 601 | 33.231 | 35.495 | 42.232 | 1.00 | 0.00 |
| H      |      |    |     |     |        |        |        |      |      |
| HETATM | 8910 | O1 | PRP | 602 | 33.861 | 33.503 | 29.168 | 1.00 | 0.00 |
| O      |      |    |     |     |        |        |        |      |      |
| HETATM | 8911 | H1 | PRP | 602 | 34.490 | 32.852 | 28.849 | 1.00 | 0.00 |
| H      |      |    |     |     |        |        |        |      |      |
| HETATM | 8912 | C1 | PRP | 602 | 32.652 | 33.456 | 28.454 | 1.00 | 0.00 |
| C      |      |    |     |     |        |        |        |      |      |
| HETATM | 8913 | H2 | PRP | 602 | 32.880 | 33.550 | 27.392 | 1.00 | 0.00 |
| H      |      |    |     |     |        |        |        |      |      |
| HETATM | 8914 | H3 | PRP | 602 | 32.040 | 32.561 | 28.571 | 1.00 | 0.00 |
| H      |      |    |     |     |        |        |        |      |      |
| HETATM | 8915 | C2 | PRP | 602 | 31.683 | 34.632 | 28.772 | 1.00 | 0.00 |
| C      |      |    |     |     |        |        |        |      |      |
| HETATM | 8916 | H4 | PRP | 602 | 32.088 | 35.577 | 28.410 | 1.00 | 0.00 |
| H      |      |    |     |     |        |        |        |      |      |
| HETATM | 8917 | O2 | PRP | 602 | 31.384 | 34.645 | 30.139 | 1.00 | 0.00 |
| O      |      |    |     |     |        |        |        |      |      |
| HETATM | 8918 | H5 | PRP | 602 | 32.120 | 35.066 | 30.589 | 1.00 | 0.00 |
| H      |      |    |     |     |        |        |        |      |      |
| HETATM | 8919 | C3 | PRP | 602 | 30.333 | 34.278 | 28.066 | 1.00 | 0.00 |
| C      |      |    |     |     |        |        |        |      |      |
| HETATM | 8920 | H6 | PRP | 602 | 30.160 | 33.242 | 28.355 | 1.00 | 0.00 |
| H      |      |    |     |     |        |        |        |      |      |
| HETATM | 8921 | H7 | PRP | 602 | 29.505 | 34.896 | 28.413 | 1.00 | 0.00 |
| H      |      |    |     |     |        |        |        |      |      |
| HETATM | 8922 | H8 | PRP | 602 | 30.399 | 34.313 | 26.978 | 1.00 | 0.00 |
| H      |      |    |     |     |        |        |        |      |      |
| HETATM | 8923 | O1 | PRP | 603 | 34.233 | 32.215 | 31.758 | 1.00 | 0.00 |
| O      |      |    |     |     |        |        |        |      |      |
| HETATM | 8924 | H1 | PRP | 603 | 33.728 | 32.493 | 30.990 | 1.00 | 0.00 |
| H      |      |    |     |     |        |        |        |      |      |
| HETATM | 8925 | C1 | PRP | 603 | 34.172 | 33.229 | 32.715 | 1.00 | 0.00 |
| C      |      |    |     |     |        |        |        |      |      |
| HETATM | 8926 | H2 | PRP | 603 | 33.326 | 33.878 | 32.488 | 1.00 | 0.00 |
| H      |      |    |     |     |        |        |        |      |      |
| HETATM | 8927 | H3 | PRP | 603 | 34.110 | 32.747 | 33.691 | 1.00 | 0.00 |
| H      |      |    |     |     |        |        |        |      |      |
| HETATM | 8928 | C2 | PRP | 603 | 35.458 | 33.983 | 32.700 | 1.00 | 0.00 |
| C      |      |    |     |     |        |        |        |      |      |
| HETATM | 8929 | H4 | PRP | 603 | 35.651 | 34.470 | 31.743 | 1.00 | 0.00 |
| H      |      |    |     |     |        |        |        |      |      |
| HETATM | 8930 | O2 | PRP | 603 | 36.542 | 33.132 | 33.105 | 1.00 | 0.00 |
| O      |      |    |     |     |        |        |        |      |      |
| HETATM | 8931 | H5 | PRP | 603 | 36.845 | 32.653 | 32.331 | 1.00 | 0.00 |
| H      |      |    |     |     |        |        |        |      |      |

|        |      |    |     |     |        |        |        |      |      |
|--------|------|----|-----|-----|--------|--------|--------|------|------|
| HETATM | 8932 | C3 | PRP | 603 | 35.123 | 35.131 | 33.676 | 1.00 | 0.00 |
| C      |      |    |     |     |        |        |        |      |      |
| HETATM | 8933 | H6 | PRP | 603 | 34.810 | 34.768 | 34.655 | 1.00 | 0.00 |
| H      |      |    |     |     |        |        |        |      |      |
| HETATM | 8934 | H7 | PRP | 603 | 36.026 | 35.729 | 33.799 | 1.00 | 0.00 |
| H      |      |    |     |     |        |        |        |      |      |
| HETATM | 8935 | H8 | PRP | 603 | 34.284 | 35.726 | 33.317 | 1.00 | 0.00 |
| H      |      |    |     |     |        |        |        |      |      |
| HETATM | 8936 | O1 | PRP | 604 | 42.409 | 49.771 | 23.650 | 1.00 | 0.00 |
| O      |      |    |     |     |        |        |        |      |      |
| HETATM | 8937 | H1 | PRP | 604 | 42.397 | 50.149 | 22.768 | 1.00 | 0.00 |
| H      |      |    |     |     |        |        |        |      |      |
| HETATM | 8938 | C1 | PRP | 604 | 41.122 | 49.920 | 24.277 | 1.00 | 0.00 |
| C      |      |    |     |     |        |        |        |      |      |
| HETATM | 8939 | H2 | PRP | 604 | 40.905 | 48.934 | 24.688 | 1.00 | 0.00 |
| H      |      |    |     |     |        |        |        |      |      |
| HETATM | 8940 | H3 | PRP | 604 | 41.115 | 50.704 | 25.034 | 1.00 | 0.00 |
| H      |      |    |     |     |        |        |        |      |      |
| HETATM | 8941 | C2 | PRP | 604 | 40.009 | 50.280 | 23.291 | 1.00 | 0.00 |
| C      |      |    |     |     |        |        |        |      |      |
| HETATM | 8942 | H4 | PRP | 604 | 39.966 | 49.521 | 22.510 | 1.00 | 0.00 |
| H      |      |    |     |     |        |        |        |      |      |
| HETATM | 8943 | O2 | PRP | 604 | 40.150 | 51.562 | 22.842 | 1.00 | 0.00 |
| O      |      |    |     |     |        |        |        |      |      |
| HETATM | 8944 | H5 | PRP | 604 | 39.853 | 52.204 | 23.491 | 1.00 | 0.00 |
| H      |      |    |     |     |        |        |        |      |      |
| HETATM | 8945 | C3 | PRP | 604 | 38.660 | 50.231 | 23.964 | 1.00 | 0.00 |
| C      |      |    |     |     |        |        |        |      |      |
| HETATM | 8946 | H6 | PRP | 604 | 38.456 | 49.294 | 24.483 | 1.00 | 0.00 |
| H      |      |    |     |     |        |        |        |      |      |
| HETATM | 8947 | H7 | PRP | 604 | 38.464 | 51.079 | 24.619 | 1.00 | 0.00 |
| H      |      |    |     |     |        |        |        |      |      |
| HETATM | 8948 | H8 | PRP | 604 | 37.925 | 50.339 | 23.167 | 1.00 | 0.00 |
| H      |      |    |     |     |        |        |        |      |      |
| HETATM | 8949 | O1 | PRP | 605 | 36.644 | 43.091 | 32.217 | 1.00 | 0.00 |
| O      |      |    |     |     |        |        |        |      |      |
| HETATM | 8950 | H1 | PRP | 605 | 37.102 | 42.562 | 32.874 | 1.00 | 0.00 |
| H      |      |    |     |     |        |        |        |      |      |
| HETATM | 8951 | C1 | PRP | 605 | 35.388 | 42.517 | 31.902 | 1.00 | 0.00 |
| C      |      |    |     |     |        |        |        |      |      |
| HETATM | 8952 | H2 | PRP | 605 | 35.516 | 41.804 | 31.088 | 1.00 | 0.00 |
| H      |      |    |     |     |        |        |        |      |      |
| HETATM | 8953 | H3 | PRP | 605 | 34.976 | 41.861 | 32.669 | 1.00 | 0.00 |
| H      |      |    |     |     |        |        |        |      |      |
| HETATM | 8954 | C2 | PRP | 605 | 34.351 | 43.627 | 31.522 | 1.00 | 0.00 |
| C      |      |    |     |     |        |        |        |      |      |
| HETATM | 8955 | H4 | PRP | 605 | 34.847 | 44.094 | 30.672 | 1.00 | 0.00 |
| H      |      |    |     |     |        |        |        |      |      |
| HETATM | 8956 | O2 | PRP | 605 | 34.096 | 44.550 | 32.588 | 1.00 | 0.00 |
| O      |      |    |     |     |        |        |        |      |      |
| HETATM | 8957 | H5 | PRP | 605 | 34.430 | 44.361 | 33.467 | 1.00 | 0.00 |
| H      |      |    |     |     |        |        |        |      |      |
| HETATM | 8958 | C3 | PRP | 605 | 33.025 | 42.973 | 31.251 | 1.00 | 0.00 |
| C      |      |    |     |     |        |        |        |      |      |
| HETATM | 8959 | H6 | PRP | 605 | 32.601 | 42.464 | 32.117 | 1.00 | 0.00 |
| H      |      |    |     |     |        |        |        |      |      |

|        |      |    |     |     |        |        |        |      |      |
|--------|------|----|-----|-----|--------|--------|--------|------|------|
| HETATM | 8960 | H7 | PRP | 605 | 32.335 | 43.787 | 31.025 | 1.00 | 0.00 |
| H      |      |    |     |     |        |        |        |      |      |
| HETATM | 8961 | H8 | PRP | 605 | 33.104 | 42.231 | 30.458 | 1.00 | 0.00 |
| H      |      |    |     |     |        |        |        |      |      |
| HETATM | 8962 | O1 | PRP | 606 | 40.015 | 32.707 | 29.379 | 1.00 | 0.00 |
| O      |      |    |     |     |        |        |        |      |      |
| HETATM | 8963 | H1 | PRP | 606 | 40.831 | 32.903 | 28.913 | 1.00 | 0.00 |
| H      |      |    |     |     |        |        |        |      |      |
| HETATM | 8964 | C1 | PRP | 606 | 39.052 | 32.371 | 28.364 | 1.00 | 0.00 |
| C      |      |    |     |     |        |        |        |      |      |
| HETATM | 8965 | H2 | PRP | 606 | 39.527 | 31.816 | 27.555 | 1.00 | 0.00 |
| H      |      |    |     |     |        |        |        |      |      |
| HETATM | 8966 | H3 | PRP | 606 | 38.363 | 31.679 | 28.848 | 1.00 | 0.00 |
| H      |      |    |     |     |        |        |        |      |      |
| HETATM | 8967 | C2 | PRP | 606 | 38.238 | 33.613 | 27.967 | 1.00 | 0.00 |
| C      |      |    |     |     |        |        |        |      |      |
| HETATM | 8968 | H4 | PRP | 606 | 37.534 | 33.349 | 27.179 | 1.00 | 0.00 |
| H      |      |    |     |     |        |        |        |      |      |
| HETATM | 8969 | O2 | PRP | 606 | 39.174 | 34.553 | 27.484 | 1.00 | 0.00 |
| O      |      |    |     |     |        |        |        |      |      |
| HETATM | 8970 | H5 | PRP | 606 | 39.710 | 34.775 | 28.249 | 1.00 | 0.00 |
| H      |      |    |     |     |        |        |        |      |      |
| HETATM | 8971 | C3 | PRP | 606 | 37.580 | 34.369 | 29.099 | 1.00 | 0.00 |
| C      |      |    |     |     |        |        |        |      |      |
| HETATM | 8972 | H6 | PRP | 606 | 38.397 | 34.849 | 29.638 | 1.00 | 0.00 |
| H      |      |    |     |     |        |        |        |      |      |
| HETATM | 8973 | H7 | PRP | 606 | 36.955 | 35.188 | 28.742 | 1.00 | 0.00 |
| H      |      |    |     |     |        |        |        |      |      |
| HETATM | 8974 | H8 | PRP | 606 | 37.040 | 33.715 | 29.783 | 1.00 | 0.00 |
| H      |      |    |     |     |        |        |        |      |      |
| HETATM | 8975 | O1 | PRP | 607 | 38.883 | 40.461 | 27.078 | 1.00 | 0.00 |
| O      |      |    |     |     |        |        |        |      |      |
| HETATM | 8976 | H1 | PRP | 607 | 38.962 | 39.631 | 27.553 | 1.00 | 0.00 |
| H      |      |    |     |     |        |        |        |      |      |
| HETATM | 8977 | C1 | PRP | 607 | 40.010 | 40.687 | 26.280 | 1.00 | 0.00 |
| C      |      |    |     |     |        |        |        |      |      |
| HETATM | 8978 | H2 | PRP | 607 | 40.883 | 40.387 | 26.860 | 1.00 | 0.00 |
| H      |      |    |     |     |        |        |        |      |      |
| HETATM | 8979 | H3 | PRP | 607 | 39.885 | 40.087 | 25.378 | 1.00 | 0.00 |
| H      |      |    |     |     |        |        |        |      |      |
| HETATM | 8980 | C2 | PRP | 607 | 40.073 | 42.175 | 25.948 | 1.00 | 0.00 |
| C      |      |    |     |     |        |        |        |      |      |
| HETATM | 8981 | H4 | PRP | 607 | 40.219 | 42.734 | 26.872 | 1.00 | 0.00 |
| H      |      |    |     |     |        |        |        |      |      |
| HETATM | 8982 | O2 | PRP | 607 | 38.800 | 42.498 | 25.422 | 1.00 | 0.00 |
| O      |      |    |     |     |        |        |        |      |      |
| HETATM | 8983 | H5 | PRP | 607 | 38.297 | 41.754 | 25.760 | 1.00 | 0.00 |
| H      |      |    |     |     |        |        |        |      |      |
| HETATM | 8984 | C3 | PRP | 607 | 41.125 | 42.576 | 24.907 | 1.00 | 0.00 |
| C      |      |    |     |     |        |        |        |      |      |
| HETATM | 8985 | H6 | PRP | 607 | 40.965 | 43.623 | 24.653 | 1.00 | 0.00 |
| H      |      |    |     |     |        |        |        |      |      |
| HETATM | 8986 | H7 | PRP | 607 | 42.147 | 42.468 | 25.271 | 1.00 | 0.00 |
| H      |      |    |     |     |        |        |        |      |      |
| HETATM | 8987 | H8 | PRP | 607 | 40.947 | 42.020 | 23.987 | 1.00 | 0.00 |
| H      |      |    |     |     |        |        |        |      |      |

|        |      |    |     |     |        |        |        |      |      |
|--------|------|----|-----|-----|--------|--------|--------|------|------|
| HETATM | 8988 | O1 | PRP | 608 | 45.207 | 34.600 | 28.087 | 1.00 | 0.00 |
| O      |      |    |     |     |        |        |        |      |      |
| HETATM | 8989 | H1 | PRP | 608 | 45.400 | 34.370 | 27.175 | 1.00 | 0.00 |
| H      |      |    |     |     |        |        |        |      |      |
| HETATM | 8990 | C1 | PRP | 608 | 45.932 | 35.816 | 28.321 | 1.00 | 0.00 |
| C      |      |    |     |     |        |        |        |      |      |
| HETATM | 8991 | H2 | PRP | 608 | 45.280 | 36.682 | 28.209 | 1.00 | 0.00 |
| H      |      |    |     |     |        |        |        |      |      |
| HETATM | 8992 | H3 | PRP | 608 | 46.337 | 35.729 | 29.329 | 1.00 | 0.00 |
| H      |      |    |     |     |        |        |        |      |      |
| HETATM | 8993 | C2 | PRP | 608 | 47.131 | 36.025 | 27.338 | 1.00 | 0.00 |
| C      |      |    |     |     |        |        |        |      |      |
| HETATM | 8994 | H4 | PRP | 608 | 47.398 | 37.082 | 27.306 | 1.00 | 0.00 |
| H      |      |    |     |     |        |        |        |      |      |
| HETATM | 8995 | O2 | PRP | 608 | 46.860 | 35.577 | 26.056 | 1.00 | 0.00 |
| O      |      |    |     |     |        |        |        |      |      |
| HETATM | 8996 | H5 | PRP | 608 | 47.553 | 35.949 | 25.506 | 1.00 | 0.00 |
| H      |      |    |     |     |        |        |        |      |      |
| HETATM | 8997 | C3 | PRP | 608 | 48.293 | 35.155 | 27.916 | 1.00 | 0.00 |
| C      |      |    |     |     |        |        |        |      |      |
| HETATM | 8998 | H6 | PRP | 608 | 48.088 | 34.099 | 27.742 | 1.00 | 0.00 |
| H      |      |    |     |     |        |        |        |      |      |
| HETATM | 8999 | H7 | PRP | 608 | 49.249 | 35.375 | 27.443 | 1.00 | 0.00 |
| H      |      |    |     |     |        |        |        |      |      |
| HETATM | 9000 | H8 | PRP | 608 | 48.445 | 35.346 | 28.979 | 1.00 | 0.00 |
| H      |      |    |     |     |        |        |        |      |      |
| HETATM | 9001 | O1 | PRP | 609 | 37.420 | 42.952 | 20.937 | 1.00 | 0.00 |
| O      |      |    |     |     |        |        |        |      |      |
| HETATM | 9002 | H1 | PRP | 609 | 37.583 | 43.353 | 20.080 | 1.00 | 0.00 |
| H      |      |    |     |     |        |        |        |      |      |
| HETATM | 9003 | C1 | PRP | 609 | 38.599 | 42.434 | 21.593 | 1.00 | 0.00 |
| C      |      |    |     |     |        |        |        |      |      |
| HETATM | 9004 | H2 | PRP | 609 | 39.459 | 43.067 | 21.377 | 1.00 | 0.00 |
| H      |      |    |     |     |        |        |        |      |      |
| HETATM | 9005 | H3 | PRP | 609 | 38.430 | 42.425 | 22.670 | 1.00 | 0.00 |
| H      |      |    |     |     |        |        |        |      |      |
| HETATM | 9006 | C2 | PRP | 609 | 38.833 | 41.037 | 21.095 | 1.00 | 0.00 |
| C      |      |    |     |     |        |        |        |      |      |
| HETATM | 9007 | H4 | PRP | 609 | 39.288 | 41.179 | 20.115 | 1.00 | 0.00 |
| H      |      |    |     |     |        |        |        |      |      |
| HETATM | 9008 | O2 | PRP | 609 | 37.674 | 40.265 | 20.933 | 1.00 | 0.00 |
| O      |      |    |     |     |        |        |        |      |      |
| HETATM | 9009 | H5 | PRP | 609 | 37.118 | 40.668 | 20.263 | 1.00 | 0.00 |
| H      |      |    |     |     |        |        |        |      |      |
| HETATM | 9010 | C3 | PRP | 609 | 39.744 | 40.235 | 21.956 | 1.00 | 0.00 |
| C      |      |    |     |     |        |        |        |      |      |
| HETATM | 9011 | H6 | PRP | 609 | 39.994 | 39.241 | 21.586 | 1.00 | 0.00 |
| H      |      |    |     |     |        |        |        |      |      |
| HETATM | 9012 | H7 | PRP | 609 | 40.726 | 40.707 | 21.994 | 1.00 | 0.00 |
| H      |      |    |     |     |        |        |        |      |      |
| HETATM | 9013 | H8 | PRP | 609 | 39.311 | 40.171 | 22.954 | 1.00 | 0.00 |
| H      |      |    |     |     |        |        |        |      |      |
| HETATM | 9014 | O1 | PRP | 610 | 39.429 | 36.955 | 23.855 | 1.00 | 0.00 |
| O      |      |    |     |     |        |        |        |      |      |
| HETATM | 9015 | H1 | PRP | 610 | 38.703 | 37.493 | 24.179 | 1.00 | 0.00 |
| H      |      |    |     |     |        |        |        |      |      |

|        |      |    |     |     |        |        |        |      |      |
|--------|------|----|-----|-----|--------|--------|--------|------|------|
| HETATM | 9016 | C1 | PRP | 610 | 40.424 | 36.731 | 24.863 | 1.00 | 0.00 |
| C      |      |    |     |     |        |        |        |      |      |
| HETATM | 9017 | H2 | PRP | 610 | 40.662 | 37.680 | 25.344 | 1.00 | 0.00 |
| H      |      |    |     |     |        |        |        |      |      |
| HETATM | 9018 | H3 | PRP | 610 | 39.998 | 36.081 | 25.626 | 1.00 | 0.00 |
| H      |      |    |     |     |        |        |        |      |      |
| HETATM | 9019 | C2 | PRP | 610 | 41.701 | 36.063 | 24.356 | 1.00 | 0.00 |
| C      |      |    |     |     |        |        |        |      |      |
| HETATM | 9020 | H4 | PRP | 610 | 42.223 | 36.640 | 23.592 | 1.00 | 0.00 |
| H      |      |    |     |     |        |        |        |      |      |
| HETATM | 9021 | O2 | PRP | 610 | 41.444 | 34.760 | 23.768 | 1.00 | 0.00 |
| O      |      |    |     |     |        |        |        |      |      |
| HETATM | 9022 | H5 | PRP | 610 | 40.590 | 34.818 | 23.334 | 1.00 | 0.00 |
| H      |      |    |     |     |        |        |        |      |      |
| HETATM | 9023 | C3 | PRP | 610 | 42.690 | 35.867 | 25.393 | 1.00 | 0.00 |
| C      |      |    |     |     |        |        |        |      |      |
| HETATM | 9024 | H6 | PRP | 610 | 42.346 | 35.452 | 26.341 | 1.00 | 0.00 |
| H      |      |    |     |     |        |        |        |      |      |
| HETATM | 9025 | H7 | PRP | 610 | 43.418 | 35.158 | 24.998 | 1.00 | 0.00 |
| H      |      |    |     |     |        |        |        |      |      |
| HETATM | 9026 | H8 | PRP | 610 | 43.158 | 36.828 | 25.607 | 1.00 | 0.00 |
| H      |      |    |     |     |        |        |        |      |      |
| HETATM | 9027 | O1 | PRP | 611 | 37.029 | 46.140 | 31.389 | 1.00 | 0.00 |
| O      |      |    |     |     |        |        |        |      |      |
| HETATM | 9028 | H1 | PRP | 611 | 37.101 | 45.193 | 31.528 | 1.00 | 0.00 |
| H      |      |    |     |     |        |        |        |      |      |
| HETATM | 9029 | C1 | PRP | 611 | 36.803 | 46.399 | 30.029 | 1.00 | 0.00 |
| C      |      |    |     |     |        |        |        |      |      |
| HETATM | 9030 | H2 | PRP | 611 | 37.732 | 46.480 | 29.464 | 1.00 | 0.00 |
| H      |      |    |     |     |        |        |        |      |      |
| HETATM | 9031 | H3 | PRP | 611 | 36.298 | 45.522 | 29.622 | 1.00 | 0.00 |
| H      |      |    |     |     |        |        |        |      |      |
| HETATM | 9032 | C2 | PRP | 611 | 35.877 | 47.623 | 29.792 | 1.00 | 0.00 |
| C      |      |    |     |     |        |        |        |      |      |
| HETATM | 9033 | H4 | PRP | 611 | 36.262 | 48.497 | 30.317 | 1.00 | 0.00 |
| H      |      |    |     |     |        |        |        |      |      |
| HETATM | 9034 | O2 | PRP | 611 | 34.677 | 47.363 | 30.458 | 1.00 | 0.00 |
| O      |      |    |     |     |        |        |        |      |      |
| HETATM | 9035 | H5 | PRP | 611 | 34.866 | 46.695 | 31.121 | 1.00 | 0.00 |
| H      |      |    |     |     |        |        |        |      |      |
| HETATM | 9036 | C3 | PRP | 611 | 35.844 | 47.902 | 28.338 | 1.00 | 0.00 |
| C      |      |    |     |     |        |        |        |      |      |
| HETATM | 9037 | H6 | PRP | 611 | 35.574 | 46.992 | 27.801 | 1.00 | 0.00 |
| H      |      |    |     |     |        |        |        |      |      |
| HETATM | 9038 | H7 | PRP | 611 | 35.115 | 48.713 | 28.318 | 1.00 | 0.00 |
| H      |      |    |     |     |        |        |        |      |      |
| HETATM | 9039 | H8 | PRP | 611 | 36.790 | 48.272 | 27.944 | 1.00 | 0.00 |
| H      |      |    |     |     |        |        |        |      |      |
| HETATM | 9040 | O1 | PRP | 612 | 47.462 | 41.318 | 33.762 | 1.00 | 0.00 |
| O      |      |    |     |     |        |        |        |      |      |
| HETATM | 9041 | H1 | PRP | 612 | 47.121 | 40.825 | 34.512 | 1.00 | 0.00 |
| H      |      |    |     |     |        |        |        |      |      |
| HETATM | 9042 | C1 | PRP | 612 | 48.787 | 41.298 | 34.012 | 1.00 | 0.00 |
| C      |      |    |     |     |        |        |        |      |      |
| HETATM | 9043 | H2 | PRP | 612 | 49.003 | 40.252 | 33.795 | 1.00 | 0.00 |
| H      |      |    |     |     |        |        |        |      |      |

|        |      |    |     |     |        |        |        |      |      |
|--------|------|----|-----|-----|--------|--------|--------|------|------|
| HETATM | 9044 | H3 | PRP | 612 | 49.323 | 42.031 | 33.409 | 1.00 | 0.00 |
| H      |      |    |     |     |        |        |        |      |      |
| HETATM | 9045 | C2 | PRP | 612 | 49.037 | 41.578 | 35.471 | 1.00 | 0.00 |
| C      |      |    |     |     |        |        |        |      |      |
| HETATM | 9046 | H4 | PRP | 612 | 50.096 | 41.468 | 35.703 | 1.00 | 0.00 |
| H      |      |    |     |     |        |        |        |      |      |
| HETATM | 9047 | O2 | PRP | 612 | 48.348 | 40.625 | 36.221 | 1.00 | 0.00 |
| O      |      |    |     |     |        |        |        |      |      |
| HETATM | 9048 | H5 | PRP | 612 | 48.707 | 40.392 | 37.081 | 1.00 | 0.00 |
| H      |      |    |     |     |        |        |        |      |      |
| HETATM | 9049 | C3 | PRP | 612 | 48.519 | 43.002 | 35.849 | 1.00 | 0.00 |
| C      |      |    |     |     |        |        |        |      |      |
| HETATM | 9050 | H6 | PRP | 612 | 48.234 | 43.590 | 34.977 | 1.00 | 0.00 |
| H      |      |    |     |     |        |        |        |      |      |
| HETATM | 9051 | H7 | PRP | 612 | 47.704 | 43.048 | 36.572 | 1.00 | 0.00 |
| H      |      |    |     |     |        |        |        |      |      |
| HETATM | 9052 | H8 | PRP | 612 | 49.304 | 43.460 | 36.451 | 1.00 | 0.00 |
| H      |      |    |     |     |        |        |        |      |      |
| HETATM | 9053 | O1 | PRP | 613 | 43.978 | 27.478 | 20.449 | 1.00 | 0.00 |
| O      |      |    |     |     |        |        |        |      |      |
| HETATM | 9054 | H1 | PRP | 613 | 43.398 | 27.358 | 19.693 | 1.00 | 0.00 |
| H      |      |    |     |     |        |        |        |      |      |
| HETATM | 9055 | C1 | PRP | 613 | 43.720 | 28.736 | 21.044 | 1.00 | 0.00 |
| C      |      |    |     |     |        |        |        |      |      |
| HETATM | 9056 | H2 | PRP | 613 | 44.678 | 29.088 | 21.426 | 1.00 | 0.00 |
| H      |      |    |     |     |        |        |        |      |      |
| HETATM | 9057 | H3 | PRP | 613 | 43.341 | 29.393 | 20.261 | 1.00 | 0.00 |
| H      |      |    |     |     |        |        |        |      |      |
| HETATM | 9058 | C2 | PRP | 613 | 42.688 | 28.609 | 22.143 | 1.00 | 0.00 |
| C      |      |    |     |     |        |        |        |      |      |
| HETATM | 9059 | H4 | PRP | 613 | 42.887 | 29.227 | 23.019 | 1.00 | 0.00 |
| H      |      |    |     |     |        |        |        |      |      |
| HETATM | 9060 | O2 | PRP | 613 | 42.789 | 27.253 | 22.689 | 1.00 | 0.00 |
| O      |      |    |     |     |        |        |        |      |      |
| HETATM | 9061 | H5 | PRP | 613 | 43.255 | 26.763 | 22.008 | 1.00 | 0.00 |
| H      |      |    |     |     |        |        |        |      |      |
| HETATM | 9062 | C3 | PRP | 613 | 41.342 | 28.867 | 21.595 | 1.00 | 0.00 |
| C      |      |    |     |     |        |        |        |      |      |
| HETATM | 9063 | H6 | PRP | 613 | 41.188 | 28.772 | 20.520 | 1.00 | 0.00 |
| H      |      |    |     |     |        |        |        |      |      |
| HETATM | 9064 | H7 | PRP | 613 | 40.605 | 28.204 | 22.050 | 1.00 | 0.00 |
| H      |      |    |     |     |        |        |        |      |      |
| HETATM | 9065 | H8 | PRP | 613 | 40.982 | 29.874 | 21.806 | 1.00 | 0.00 |
| H      |      |    |     |     |        |        |        |      |      |
| HETATM | 9066 | O1 | PRP | 614 | 39.360 | 32.687 | 16.990 | 1.00 | 0.00 |
| O      |      |    |     |     |        |        |        |      |      |
| HETATM | 9067 | H1 | PRP | 614 | 39.083 | 31.768 | 16.986 | 1.00 | 0.00 |
| H      |      |    |     |     |        |        |        |      |      |
| HETATM | 9068 | C1 | PRP | 614 | 40.797 | 32.734 | 17.043 | 1.00 | 0.00 |
| C      |      |    |     |     |        |        |        |      |      |
| HETATM | 9069 | H2 | PRP | 614 | 41.199 | 32.494 | 16.059 | 1.00 | 0.00 |
| H      |      |    |     |     |        |        |        |      |      |
| HETATM | 9070 | H3 | PRP | 614 | 41.302 | 33.672 | 17.272 | 1.00 | 0.00 |
| H      |      |    |     |     |        |        |        |      |      |
| HETATM | 9071 | C2 | PRP | 614 | 41.436 | 31.766 | 18.041 | 1.00 | 0.00 |
| C      |      |    |     |     |        |        |        |      |      |

|        |      |    |     |     |        |        |        |      |      |
|--------|------|----|-----|-----|--------|--------|--------|------|------|
| HETATM | 9072 | H4 | PRP | 614 | 42.508 | 31.751 | 17.843 | 1.00 | 0.00 |
| H      |      |    |     |     |        |        |        |      |      |
| HETATM | 9073 | O2 | PRP | 614 | 40.968 | 30.430 | 17.768 | 1.00 | 0.00 |
| O      |      |    |     |     |        |        |        |      |      |
| HETATM | 9074 | H5 | PRP | 614 | 40.824 | 30.325 | 16.825 | 1.00 | 0.00 |
| H      |      |    |     |     |        |        |        |      |      |
| HETATM | 9075 | C3 | PRP | 614 | 41.100 | 32.220 | 19.454 | 1.00 | 0.00 |
| C      |      |    |     |     |        |        |        |      |      |
| HETATM | 9076 | H6 | PRP | 614 | 41.858 | 31.854 | 20.148 | 1.00 | 0.00 |
| H      |      |    |     |     |        |        |        |      |      |
| HETATM | 9077 | H7 | PRP | 614 | 41.058 | 33.308 | 19.504 | 1.00 | 0.00 |
| H      |      |    |     |     |        |        |        |      |      |
| HETATM | 9078 | H8 | PRP | 614 | 40.122 | 31.852 | 19.764 | 1.00 | 0.00 |
| H      |      |    |     |     |        |        |        |      |      |
| HETATM | 9079 | O1 | PRP | 615 | 36.547 | 29.441 | 14.000 | 1.00 | 0.00 |
| O      |      |    |     |     |        |        |        |      |      |
| HETATM | 9080 | H1 | PRP | 615 | 35.701 | 29.237 | 13.595 | 1.00 | 0.00 |
| H      |      |    |     |     |        |        |        |      |      |
| HETATM | 9081 | C1 | PRP | 615 | 37.342 | 28.407 | 14.486 | 1.00 | 0.00 |
| C      |      |    |     |     |        |        |        |      |      |
| HETATM | 9082 | H2 | PRP | 615 | 36.931 | 28.060 | 15.434 | 1.00 | 0.00 |
| H      |      |    |     |     |        |        |        |      |      |
| HETATM | 9083 | H3 | PRP | 615 | 37.346 | 27.627 | 13.724 | 1.00 | 0.00 |
| H      |      |    |     |     |        |        |        |      |      |
| HETATM | 9084 | C2 | PRP | 615 | 38.848 | 28.825 | 14.541 | 1.00 | 0.00 |
| C      |      |    |     |     |        |        |        |      |      |
| HETATM | 9085 | H4 | PRP | 615 | 39.327 | 27.967 | 15.013 | 1.00 | 0.00 |
| H      |      |    |     |     |        |        |        |      |      |
| HETATM | 9086 | O2 | PRP | 615 | 38.901 | 30.005 | 15.346 | 1.00 | 0.00 |
| O      |      |    |     |     |        |        |        |      |      |
| HETATM | 9087 | H5 | PRP | 615 | 38.004 | 30.257 | 15.576 | 1.00 | 0.00 |
| H      |      |    |     |     |        |        |        |      |      |
| HETATM | 9088 | C3 | PRP | 615 | 39.598 | 29.239 | 13.184 | 1.00 | 0.00 |
| C      |      |    |     |     |        |        |        |      |      |
| HETATM | 9089 | H6 | PRP | 615 | 39.277 | 30.219 | 12.833 | 1.00 | 0.00 |
| H      |      |    |     |     |        |        |        |      |      |
| HETATM | 9090 | H7 | PRP | 615 | 40.660 | 29.310 | 13.418 | 1.00 | 0.00 |
| H      |      |    |     |     |        |        |        |      |      |
| HETATM | 9091 | H8 | PRP | 615 | 39.346 | 28.541 | 12.386 | 1.00 | 0.00 |
| H      |      |    |     |     |        |        |        |      |      |
| HETATM | 9092 | O1 | PRP | 616 | 54.254 | 37.394 | 28.505 | 1.00 | 0.00 |
| O      |      |    |     |     |        |        |        |      |      |
| HETATM | 9093 | H1 | PRP | 616 | 54.486 | 37.510 | 27.581 | 1.00 | 0.00 |
| H      |      |    |     |     |        |        |        |      |      |
| HETATM | 9094 | C1 | PRP | 616 | 53.046 | 38.071 | 28.640 | 1.00 | 0.00 |
| C      |      |    |     |     |        |        |        |      |      |
| HETATM | 9095 | H2 | PRP | 616 | 52.586 | 37.811 | 29.593 | 1.00 | 0.00 |
| H      |      |    |     |     |        |        |        |      |      |
| HETATM | 9096 | H3 | PRP | 616 | 53.165 | 39.152 | 28.570 | 1.00 | 0.00 |
| H      |      |    |     |     |        |        |        |      |      |
| HETATM | 9097 | C2 | PRP | 616 | 52.034 | 37.669 | 27.518 | 1.00 | 0.00 |
| C      |      |    |     |     |        |        |        |      |      |
| HETATM | 9098 | H4 | PRP | 616 | 51.892 | 36.589 | 27.549 | 1.00 | 0.00 |
| H      |      |    |     |     |        |        |        |      |      |
| HETATM | 9099 | O2 | PRP | 616 | 52.551 | 38.234 | 26.246 | 1.00 | 0.00 |
| O      |      |    |     |     |        |        |        |      |      |



|        |      |    |     |     |        |        |        |      |      |
|--------|------|----|-----|-----|--------|--------|--------|------|------|
| HETATM | 9100 | H5 | PRP | 616 | 53.098 | 37.656 | 25.708 | 1.00 | 0.00 |
| H      |      |    |     |     |        |        |        |      |      |
| HETATM | 9101 | C3 | PRP | 616 | 50.672 | 38.412 | 27.723 | 1.00 | 0.00 |
| C      |      |    |     |     |        |        |        |      |      |
| HETATM | 9102 | H6 | PRP | 616 | 50.847 | 39.487 | 27.689 | 1.00 | 0.00 |
| H      |      |    |     |     |        |        |        |      |      |
| HETATM | 9103 | H7 | PRP | 616 | 49.955 | 38.137 | 26.950 | 1.00 | 0.00 |
| H      |      |    |     |     |        |        |        |      |      |
| HETATM | 9104 | H8 | PRP | 616 | 50.172 | 38.201 | 28.669 | 1.00 | 0.00 |
| H      |      |    |     |     |        |        |        |      |      |
| HETATM | 9105 | O1 | PRP | 617 | 32.151 | 51.476 | 22.253 | 1.00 | 0.00 |
| O      |      |    |     |     |        |        |        |      |      |
| HETATM | 9106 | H1 | PRP | 617 | 32.964 | 51.955 | 22.433 | 1.00 | 0.00 |
| H      |      |    |     |     |        |        |        |      |      |
| HETATM | 9107 | C1 | PRP | 617 | 31.820 | 50.643 | 23.354 | 1.00 | 0.00 |
| C      |      |    |     |     |        |        |        |      |      |
| HETATM | 9108 | H2 | PRP | 617 | 31.005 | 49.999 | 23.023 | 1.00 | 0.00 |
| H      |      |    |     |     |        |        |        |      |      |
| HETATM | 9109 | H3 | PRP | 617 | 32.665 | 49.998 | 23.597 | 1.00 | 0.00 |
| H      |      |    |     |     |        |        |        |      |      |
| HETATM | 9110 | C2 | PRP | 617 | 31.470 | 51.493 | 24.615 | 1.00 | 0.00 |
| C      |      |    |     |     |        |        |        |      |      |
| HETATM | 9111 | H4 | PRP | 617 | 31.149 | 52.468 | 24.246 | 1.00 | 0.00 |
| H      |      |    |     |     |        |        |        |      |      |
| HETATM | 9112 | O2 | PRP | 617 | 32.658 | 51.487 | 25.411 | 1.00 | 0.00 |
| O      |      |    |     |     |        |        |        |      |      |
| HETATM | 9113 | H5 | PRP | 617 | 32.623 | 50.716 | 25.981 | 1.00 | 0.00 |
| H      |      |    |     |     |        |        |        |      |      |
| HETATM | 9114 | C3 | PRP | 617 | 30.399 | 50.709 | 25.373 | 1.00 | 0.00 |
| C      |      |    |     |     |        |        |        |      |      |
| HETATM | 9115 | H6 | PRP | 617 | 30.799 | 49.736 | 25.655 | 1.00 | 0.00 |
| H      |      |    |     |     |        |        |        |      |      |
| HETATM | 9116 | H7 | PRP | 617 | 30.221 | 51.167 | 26.346 | 1.00 | 0.00 |
| H      |      |    |     |     |        |        |        |      |      |
| HETATM | 9117 | H8 | PRP | 617 | 29.482 | 50.744 | 24.785 | 1.00 | 0.00 |
| H      |      |    |     |     |        |        |        |      |      |
| HETATM | 9118 | O1 | PRP | 618 | 37.504 | 56.151 | 26.186 | 1.00 | 0.00 |
| O      |      |    |     |     |        |        |        |      |      |
| HETATM | 9119 | H1 | PRP | 618 | 36.975 | 56.401 | 25.425 | 1.00 | 0.00 |
| H      |      |    |     |     |        |        |        |      |      |
| HETATM | 9120 | C1 | PRP | 618 | 36.646 | 55.742 | 27.175 | 1.00 | 0.00 |
| C      |      |    |     |     |        |        |        |      |      |
| HETATM | 9121 | H2 | PRP | 618 | 35.695 | 56.210 | 26.922 | 1.00 | 0.00 |
| H      |      |    |     |     |        |        |        |      |      |
| HETATM | 9122 | H3 | PRP | 618 | 36.585 | 54.659 | 27.069 | 1.00 | 0.00 |
| H      |      |    |     |     |        |        |        |      |      |
| HETATM | 9123 | C2 | PRP | 618 | 37.024 | 56.003 | 28.590 | 1.00 | 0.00 |
| C      |      |    |     |     |        |        |        |      |      |
| HETATM | 9124 | H4 | PRP | 618 | 36.326 | 55.461 | 29.228 | 1.00 | 0.00 |
| H      |      |    |     |     |        |        |        |      |      |
| HETATM | 9125 | O2 | PRP | 618 | 36.949 | 57.408 | 28.913 | 1.00 | 0.00 |
| O      |      |    |     |     |        |        |        |      |      |
| HETATM | 9126 | H5 | PRP | 618 | 36.037 | 57.678 | 28.784 | 1.00 | 0.00 |
| H      |      |    |     |     |        |        |        |      |      |
| HETATM | 9127 | C3 | PRP | 618 | 38.434 | 55.465 | 28.880 | 1.00 | 0.00 |
| C      |      |    |     |     |        |        |        |      |      |

|        |      |    |     |     |        |        |        |      |      |
|--------|------|----|-----|-----|--------|--------|--------|------|------|
| HETATM | 9128 | H6 | PRP | 618 | 39.108 | 55.720 | 28.062 | 1.00 | 0.00 |
| H      |      |    |     |     |        |        |        |      |      |
| HETATM | 9129 | H7 | PRP | 618 | 38.891 | 55.865 | 29.784 | 1.00 | 0.00 |
| H      |      |    |     |     |        |        |        |      |      |
| HETATM | 9130 | H8 | PRP | 618 | 38.407 | 54.392 | 29.071 | 1.00 | 0.00 |
| H      |      |    |     |     |        |        |        |      |      |
| HETATM | 9131 | O1 | PRP | 619 | 24.175 | 60.724 | 29.545 | 1.00 | 0.00 |
| O      |      |    |     |     |        |        |        |      |      |
| HETATM | 9132 | H1 | PRP | 619 | 24.775 | 61.227 | 30.101 | 1.00 | 0.00 |
| H      |      |    |     |     |        |        |        |      |      |
| HETATM | 9133 | C1 | PRP | 619 | 24.603 | 60.883 | 28.243 | 1.00 | 0.00 |
| C      |      |    |     |     |        |        |        |      |      |
| HETATM | 9134 | H2 | PRP | 619 | 25.234 | 60.026 | 28.006 | 1.00 | 0.00 |
| H      |      |    |     |     |        |        |        |      |      |
| HETATM | 9135 | H3 | PRP | 619 | 23.757 | 60.836 | 27.558 | 1.00 | 0.00 |
| H      |      |    |     |     |        |        |        |      |      |
| HETATM | 9136 | C2 | PRP | 619 | 25.368 | 62.218 | 28.263 | 1.00 | 0.00 |
| C      |      |    |     |     |        |        |        |      |      |
| HETATM | 9137 | H4 | PRP | 619 | 25.908 | 62.272 | 27.318 | 1.00 | 0.00 |
| H      |      |    |     |     |        |        |        |      |      |
| HETATM | 9138 | O2 | PRP | 619 | 26.266 | 62.314 | 29.391 | 1.00 | 0.00 |
| O      |      |    |     |     |        |        |        |      |      |
| HETATM | 9139 | H5 | PRP | 619 | 26.796 | 63.108 | 29.296 | 1.00 | 0.00 |
| H      |      |    |     |     |        |        |        |      |      |
| HETATM | 9140 | C3 | PRP | 619 | 24.362 | 63.455 | 28.168 | 1.00 | 0.00 |
| C      |      |    |     |     |        |        |        |      |      |
| HETATM | 9141 | H6 | PRP | 619 | 23.596 | 63.226 | 28.909 | 1.00 | 0.00 |
| H      |      |    |     |     |        |        |        |      |      |
| HETATM | 9142 | H7 | PRP | 619 | 24.901 | 64.362 | 28.439 | 1.00 | 0.00 |
| H      |      |    |     |     |        |        |        |      |      |
| HETATM | 9143 | H8 | PRP | 619 | 23.795 | 63.553 | 27.242 | 1.00 | 0.00 |
| H      |      |    |     |     |        |        |        |      |      |
| HETATM | 9144 | O1 | PRP | 620 | 40.560 | 51.578 | 34.169 | 1.00 | 0.00 |
| O      |      |    |     |     |        |        |        |      |      |
| HETATM | 9145 | H1 | PRP | 620 | 40.803 | 50.663 | 34.329 | 1.00 | 0.00 |
| H      |      |    |     |     |        |        |        |      |      |
| HETATM | 9146 | C1 | PRP | 620 | 40.230 | 51.604 | 32.750 | 1.00 | 0.00 |
| C      |      |    |     |     |        |        |        |      |      |
| HETATM | 9147 | H2 | PRP | 620 | 40.578 | 50.697 | 32.256 | 1.00 | 0.00 |
| H      |      |    |     |     |        |        |        |      |      |
| HETATM | 9148 | H3 | PRP | 620 | 39.143 | 51.636 | 32.682 | 1.00 | 0.00 |
| H      |      |    |     |     |        |        |        |      |      |
| HETATM | 9149 | C2 | PRP | 620 | 40.752 | 52.841 | 32.014 | 1.00 | 0.00 |
| C      |      |    |     |     |        |        |        |      |      |
| HETATM | 9150 | H4 | PRP | 620 | 40.353 | 52.930 | 31.003 | 1.00 | 0.00 |
| H      |      |    |     |     |        |        |        |      |      |
| HETATM | 9151 | O2 | PRP | 620 | 42.137 | 52.609 | 31.922 | 1.00 | 0.00 |
| O      |      |    |     |     |        |        |        |      |      |
| HETATM | 9152 | H5 | PRP | 620 | 42.527 | 53.232 | 31.305 | 1.00 | 0.00 |
| H      |      |    |     |     |        |        |        |      |      |
| HETATM | 9153 | C3 | PRP | 620 | 40.563 | 54.128 | 32.720 | 1.00 | 0.00 |
| C      |      |    |     |     |        |        |        |      |      |
| HETATM | 9154 | H6 | PRP | 620 | 40.796 | 55.001 | 32.110 | 1.00 | 0.00 |
| H      |      |    |     |     |        |        |        |      |      |
| HETATM | 9155 | H7 | PRP | 620 | 39.505 | 54.253 | 32.950 | 1.00 | 0.00 |
| H      |      |    |     |     |        |        |        |      |      |

|        |      |    |     |     |        |        |        |      |      |
|--------|------|----|-----|-----|--------|--------|--------|------|------|
| HETATM | 9156 | H8 | PRP | 620 | 41.054 | 54.113 | 33.693 | 1.00 | 0.00 |
| H      |      |    |     |     |        |        |        |      |      |
| HETATM | 9157 | O1 | PRP | 621 | 24.009 | 50.598 | 34.493 | 1.00 | 0.00 |
| O      |      |    |     |     |        |        |        |      |      |
| HETATM | 9158 | H1 | PRP | 621 | 23.910 | 51.361 | 33.919 | 1.00 | 0.00 |
| H      |      |    |     |     |        |        |        |      |      |
| HETATM | 9159 | C1 | PRP | 621 | 25.391 | 50.713 | 34.904 | 1.00 | 0.00 |
| C      |      |    |     |     |        |        |        |      |      |
| HETATM | 9160 | H2 | PRP | 621 | 25.985 | 50.887 | 34.007 | 1.00 | 0.00 |
| H      |      |    |     |     |        |        |        |      |      |
| HETATM | 9161 | H3 | PRP | 621 | 25.545 | 51.592 | 35.530 | 1.00 | 0.00 |
| H      |      |    |     |     |        |        |        |      |      |
| HETATM | 9162 | C2 | PRP | 621 | 25.709 | 49.418 | 35.625 | 1.00 | 0.00 |
| C      |      |    |     |     |        |        |        |      |      |
| HETATM | 9163 | H4 | PRP | 621 | 25.098 | 48.615 | 35.212 | 1.00 | 0.00 |
| H      |      |    |     |     |        |        |        |      |      |
| HETATM | 9164 | O2 | PRP | 621 | 25.342 | 49.519 | 36.987 | 1.00 | 0.00 |
| O      |      |    |     |     |        |        |        |      |      |
| HETATM | 9165 | H5 | PRP | 621 | 24.384 | 49.466 | 37.036 | 1.00 | 0.00 |
| H      |      |    |     |     |        |        |        |      |      |
| HETATM | 9166 | C3 | PRP | 621 | 27.200 | 49.129 | 35.623 | 1.00 | 0.00 |
| C      |      |    |     |     |        |        |        |      |      |
| HETATM | 9167 | H6 | PRP | 621 | 27.399 | 48.156 | 36.072 | 1.00 | 0.00 |
| H      |      |    |     |     |        |        |        |      |      |
| HETATM | 9168 | H7 | PRP | 621 | 27.681 | 49.224 | 34.649 | 1.00 | 0.00 |
| H      |      |    |     |     |        |        |        |      |      |
| HETATM | 9169 | H8 | PRP | 621 | 27.640 | 49.879 | 36.281 | 1.00 | 0.00 |
| H      |      |    |     |     |        |        |        |      |      |
| HETATM | 9170 | O1 | PRP | 622 | 18.712 | 46.854 | 20.154 | 1.00 | 0.00 |
| O      |      |    |     |     |        |        |        |      |      |
| HETATM | 9171 | H1 | PRP | 622 | 18.714 | 46.669 | 21.096 | 1.00 | 0.00 |
| H      |      |    |     |     |        |        |        |      |      |
| HETATM | 9172 | C1 | PRP | 622 | 19.409 | 45.841 | 19.441 | 1.00 | 0.00 |
| C      |      |    |     |     |        |        |        |      |      |
| HETATM | 9173 | H2 | PRP | 622 | 18.796 | 45.141 | 18.874 | 1.00 | 0.00 |
| H      |      |    |     |     |        |        |        |      |      |
| HETATM | 9174 | H3 | PRP | 622 | 19.997 | 46.405 | 18.716 | 1.00 | 0.00 |
| H      |      |    |     |     |        |        |        |      |      |
| HETATM | 9175 | C2 | PRP | 622 | 20.413 | 45.025 | 20.326 | 1.00 | 0.00 |
| C      |      |    |     |     |        |        |        |      |      |
| HETATM | 9176 | H4 | PRP | 622 | 20.809 | 44.199 | 19.736 | 1.00 | 0.00 |
| H      |      |    |     |     |        |        |        |      |      |
| HETATM | 9177 | O2 | PRP | 622 | 19.688 | 44.659 | 21.524 | 1.00 | 0.00 |
| O      |      |    |     |     |        |        |        |      |      |
| HETATM | 9178 | H5 | PRP | 622 | 20.178 | 43.890 | 21.825 | 1.00 | 0.00 |
| H      |      |    |     |     |        |        |        |      |      |
| HETATM | 9179 | C3 | PRP | 622 | 21.508 | 46.003 | 20.766 | 1.00 | 0.00 |
| C      |      |    |     |     |        |        |        |      |      |
| HETATM | 9180 | H6 | PRP | 622 | 22.175 | 46.301 | 19.957 | 1.00 | 0.00 |
| H      |      |    |     |     |        |        |        |      |      |
| HETATM | 9181 | H7 | PRP | 622 | 21.192 | 46.915 | 21.273 | 1.00 | 0.00 |
| H      |      |    |     |     |        |        |        |      |      |
| HETATM | 9182 | H8 | PRP | 622 | 22.203 | 45.532 | 21.461 | 1.00 | 0.00 |
| H      |      |    |     |     |        |        |        |      |      |
| HETATM | 9183 | O1 | PRP | 623 | 34.844 | 53.114 | 32.924 | 1.00 | 0.00 |
| O      |      |    |     |     |        |        |        |      |      |

|        |      |    |     |     |        |        |        |      |      |
|--------|------|----|-----|-----|--------|--------|--------|------|------|
| HETATM | 9184 | H1 | PRP | 623 | 35.070 | 52.283 | 33.348 | 1.00 | 0.00 |
| H      |      |    |     |     |        |        |        |      |      |
| HETATM | 9185 | C1 | PRP | 623 | 34.689 | 52.862 | 31.560 | 1.00 | 0.00 |
| C      |      |    |     |     |        |        |        |      |      |
| HETATM | 9186 | H2 | PRP | 623 | 34.521 | 53.838 | 31.104 | 1.00 | 0.00 |
| H      |      |    |     |     |        |        |        |      |      |
| HETATM | 9187 | H3 | PRP | 623 | 35.545 | 52.301 | 31.185 | 1.00 | 0.00 |
| H      |      |    |     |     |        |        |        |      |      |
| HETATM | 9188 | C2 | PRP | 623 | 33.399 | 52.210 | 31.135 | 1.00 | 0.00 |
| C      |      |    |     |     |        |        |        |      |      |
| HETATM | 9189 | H4 | PRP | 623 | 33.383 | 52.191 | 30.046 | 1.00 | 0.00 |
| H      |      |    |     |     |        |        |        |      |      |
| HETATM | 9190 | O2 | PRP | 623 | 32.298 | 52.945 | 31.643 | 1.00 | 0.00 |
| O      |      |    |     |     |        |        |        |      |      |
| HETATM | 9191 | H5 | PRP | 623 | 32.356 | 52.973 | 32.601 | 1.00 | 0.00 |
| H      |      |    |     |     |        |        |        |      |      |
| HETATM | 9192 | C3 | PRP | 623 | 33.296 | 50.816 | 31.681 | 1.00 | 0.00 |
| C      |      |    |     |     |        |        |        |      |      |
| HETATM | 9193 | H6 | PRP | 623 | 33.512 | 50.751 | 32.748 | 1.00 | 0.00 |
| H      |      |    |     |     |        |        |        |      |      |
| HETATM | 9194 | H7 | PRP | 623 | 32.305 | 50.426 | 31.451 | 1.00 | 0.00 |
| H      |      |    |     |     |        |        |        |      |      |
| HETATM | 9195 | H8 | PRP | 623 | 34.020 | 50.094 | 31.304 | 1.00 | 0.00 |
| H      |      |    |     |     |        |        |        |      |      |
| HETATM | 9196 | O1 | PRP | 624 | 40.693 | 36.024 | 29.414 | 1.00 | 0.00 |
| O      |      |    |     |     |        |        |        |      |      |
| HETATM | 9197 | H1 | PRP | 624 | 41.573 | 35.666 | 29.553 | 1.00 | 0.00 |
| H      |      |    |     |     |        |        |        |      |      |
| HETATM | 9198 | C1 | PRP | 624 | 40.575 | 37.410 | 29.675 | 1.00 | 0.00 |
| C      |      |    |     |     |        |        |        |      |      |
| HETATM | 9199 | H2 | PRP | 624 | 40.922 | 37.668 | 30.675 | 1.00 | 0.00 |
| H      |      |    |     |     |        |        |        |      |      |
| HETATM | 9200 | H3 | PRP | 624 | 41.069 | 37.942 | 28.862 | 1.00 | 0.00 |
| H      |      |    |     |     |        |        |        |      |      |
| HETATM | 9201 | C2 | PRP | 624 | 39.072 | 37.751 | 29.506 | 1.00 | 0.00 |
| C      |      |    |     |     |        |        |        |      |      |
| HETATM | 9202 | H4 | PRP | 624 | 38.476 | 36.958 | 29.958 | 1.00 | 0.00 |
| H      |      |    |     |     |        |        |        |      |      |
| HETATM | 9203 | O2 | PRP | 624 | 38.711 | 37.807 | 28.127 | 1.00 | 0.00 |
| O      |      |    |     |     |        |        |        |      |      |
| HETATM | 9204 | H5 | PRP | 624 | 38.838 | 36.911 | 27.805 | 1.00 | 0.00 |
| H      |      |    |     |     |        |        |        |      |      |
| HETATM | 9205 | C3 | PRP | 624 | 38.603 | 39.074 | 30.166 | 1.00 | 0.00 |
| C      |      |    |     |     |        |        |        |      |      |
| HETATM | 9206 | H6 | PRP | 624 | 38.605 | 38.955 | 31.250 | 1.00 | 0.00 |
| H      |      |    |     |     |        |        |        |      |      |
| HETATM | 9207 | H7 | PRP | 624 | 39.281 | 39.895 | 29.930 | 1.00 | 0.00 |
| H      |      |    |     |     |        |        |        |      |      |
| HETATM | 9208 | H8 | PRP | 624 | 37.588 | 39.396 | 29.932 | 1.00 | 0.00 |
| H      |      |    |     |     |        |        |        |      |      |
| HETATM | 9209 | O1 | PRP | 625 | 28.821 | 47.580 | 21.114 | 1.00 | 0.00 |
| O      |      |    |     |     |        |        |        |      |      |
| HETATM | 9210 | H1 | PRP | 625 | 28.525 | 48.137 | 20.390 | 1.00 | 0.00 |
| H      |      |    |     |     |        |        |        |      |      |
| HETATM | 9211 | C1 | PRP | 625 | 30.109 | 47.178 | 20.780 | 1.00 | 0.00 |
| C      |      |    |     |     |        |        |        |      |      |

|        |      |    |     |     |        |        |        |      |      |
|--------|------|----|-----|-----|--------|--------|--------|------|------|
| HETATM | 9212 | H2 | PRP | 625 | 30.636 | 46.934 | 21.702 | 1.00 | 0.00 |
| H      |      |    |     |     |        |        |        |      |      |
| HETATM | 9213 | H3 | PRP | 625 | 30.200 | 46.419 | 20.003 | 1.00 | 0.00 |
| H      |      |    |     |     |        |        |        |      |      |
| HETATM | 9214 | C2 | PRP | 625 | 30.759 | 48.472 | 20.326 | 1.00 | 0.00 |
| C      |      |    |     |     |        |        |        |      |      |
| HETATM | 9215 | H4 | PRP | 625 | 30.490 | 49.200 | 21.092 | 1.00 | 0.00 |
| H      |      |    |     |     |        |        |        |      |      |
| HETATM | 9216 | O2 | PRP | 625 | 30.296 | 48.957 | 19.142 | 1.00 | 0.00 |
| O      |      |    |     |     |        |        |        |      |      |
| HETATM | 9217 | H5 | PRP | 625 | 30.290 | 48.242 | 18.500 | 1.00 | 0.00 |
| H      |      |    |     |     |        |        |        |      |      |
| HETATM | 9218 | C3 | PRP | 625 | 32.237 | 48.443 | 20.220 | 1.00 | 0.00 |
| C      |      |    |     |     |        |        |        |      |      |
| HETATM | 9219 | H6 | PRP | 625 | 32.433 | 47.409 | 19.938 | 1.00 | 0.00 |
| H      |      |    |     |     |        |        |        |      |      |
| HETATM | 9220 | H7 | PRP | 625 | 32.623 | 49.056 | 19.405 | 1.00 | 0.00 |
| H      |      |    |     |     |        |        |        |      |      |
| HETATM | 9221 | H8 | PRP | 625 | 32.733 | 48.725 | 21.148 | 1.00 | 0.00 |
| H      |      |    |     |     |        |        |        |      |      |
| HETATM | 9222 | O1 | PRP | 626 | 30.856 | 46.695 | 27.764 | 1.00 | 0.00 |
| O      |      |    |     |     |        |        |        |      |      |
| HETATM | 9223 | H1 | PRP | 626 | 29.913 | 46.567 | 27.893 | 1.00 | 0.00 |
| H      |      |    |     |     |        |        |        |      |      |
| HETATM | 9224 | C1 | PRP | 626 | 31.440 | 46.887 | 29.053 | 1.00 | 0.00 |
| C      |      |    |     |     |        |        |        |      |      |
| HETATM | 9225 | H2 | PRP | 626 | 31.252 | 46.064 | 29.743 | 1.00 | 0.00 |
| H      |      |    |     |     |        |        |        |      |      |
| HETATM | 9226 | H3 | PRP | 626 | 32.525 | 46.916 | 28.948 | 1.00 | 0.00 |
| H      |      |    |     |     |        |        |        |      |      |
| HETATM | 9227 | C2 | PRP | 626 | 31.092 | 48.202 | 29.773 | 1.00 | 0.00 |
| C      |      |    |     |     |        |        |        |      |      |
| HETATM | 9228 | H4 | PRP | 626 | 31.725 | 48.265 | 30.658 | 1.00 | 0.00 |
| H      |      |    |     |     |        |        |        |      |      |
| HETATM | 9229 | O2 | PRP | 626 | 29.756 | 48.254 | 30.198 | 1.00 | 0.00 |
| O      |      |    |     |     |        |        |        |      |      |
| HETATM | 9230 | H5 | PRP | 626 | 29.426 | 47.455 | 30.616 | 1.00 | 0.00 |
| H      |      |    |     |     |        |        |        |      |      |
| HETATM | 9231 | C3 | PRP | 626 | 31.474 | 49.433 | 29.032 | 1.00 | 0.00 |
| C      |      |    |     |     |        |        |        |      |      |
| HETATM | 9232 | H6 | PRP | 626 | 32.507 | 49.406 | 28.685 | 1.00 | 0.00 |
| H      |      |    |     |     |        |        |        |      |      |
| HETATM | 9233 | H7 | PRP | 626 | 30.728 | 49.496 | 28.240 | 1.00 | 0.00 |
| H      |      |    |     |     |        |        |        |      |      |
| HETATM | 9234 | H8 | PRP | 626 | 31.263 | 50.351 | 29.580 | 1.00 | 0.00 |
| H      |      |    |     |     |        |        |        |      |      |
| HETATM | 9235 | O1 | PRP | 627 | 30.386 | 59.358 | 21.308 | 1.00 | 0.00 |
| O      |      |    |     |     |        |        |        |      |      |
| HETATM | 9236 | H1 | PRP | 627 | 30.212 | 58.996 | 20.436 | 1.00 | 0.00 |
| H      |      |    |     |     |        |        |        |      |      |
| HETATM | 9237 | C1 | PRP | 627 | 29.603 | 60.514 | 21.168 | 1.00 | 0.00 |
| C      |      |    |     |     |        |        |        |      |      |
| HETATM | 9238 | H2 | PRP | 627 | 28.562 | 60.276 | 21.384 | 1.00 | 0.00 |
| H      |      |    |     |     |        |        |        |      |      |
| HETATM | 9239 | H3 | PRP | 627 | 29.915 | 61.296 | 21.860 | 1.00 | 0.00 |
| H      |      |    |     |     |        |        |        |      |      |

|        |      |    |     |     |        |        |        |      |      |
|--------|------|----|-----|-----|--------|--------|--------|------|------|
| HETATM | 9240 | C2 | PRP | 627 | 29.583 | 61.010 | 19.715 | 1.00 | 0.00 |
| C      |      |    |     |     |        |        |        |      |      |
| HETATM | 9241 | H4 | PRP | 627 | 28.802 | 61.742 | 19.507 | 1.00 | 0.00 |
| H      |      |    |     |     |        |        |        |      |      |
| HETATM | 9242 | O2 | PRP | 627 | 29.455 | 59.874 | 18.901 | 1.00 | 0.00 |
| O      |      |    |     |     |        |        |        |      |      |
| HETATM | 9243 | H5 | PRP | 627 | 29.549 | 60.027 | 17.958 | 1.00 | 0.00 |
| H      |      |    |     |     |        |        |        |      |      |
| HETATM | 9244 | C3 | PRP | 627 | 30.990 | 61.629 | 19.447 | 1.00 | 0.00 |
| C      |      |    |     |     |        |        |        |      |      |
| HETATM | 9245 | H6 | PRP | 627 | 31.783 | 61.116 | 19.992 | 1.00 | 0.00 |
| H      |      |    |     |     |        |        |        |      |      |
| HETATM | 9246 | H7 | PRP | 627 | 31.120 | 61.643 | 18.365 | 1.00 | 0.00 |
| H      |      |    |     |     |        |        |        |      |      |
| HETATM | 9247 | H8 | PRP | 627 | 30.890 | 62.637 | 19.848 | 1.00 | 0.00 |
| H      |      |    |     |     |        |        |        |      |      |
| HETATM | 9248 | O1 | PRP | 628 | 37.002 | 46.239 | 34.773 | 1.00 | 0.00 |
| O      |      |    |     |     |        |        |        |      |      |
| HETATM | 9249 | H1 | PRP | 628 | 36.839 | 46.249 | 33.827 | 1.00 | 0.00 |
| H      |      |    |     |     |        |        |        |      |      |
| HETATM | 9250 | C1 | PRP | 628 | 38.053 | 45.330 | 34.888 | 1.00 | 0.00 |
| C      |      |    |     |     |        |        |        |      |      |
| HETATM | 9251 | H2 | PRP | 628 | 37.737 | 44.330 | 34.592 | 1.00 | 0.00 |
| H      |      |    |     |     |        |        |        |      |      |
| HETATM | 9252 | H3 | PRP | 628 | 38.772 | 45.630 | 34.125 | 1.00 | 0.00 |
| H      |      |    |     |     |        |        |        |      |      |
| HETATM | 9253 | C2 | PRP | 628 | 38.802 | 45.307 | 36.244 | 1.00 | 0.00 |
| C      |      |    |     |     |        |        |        |      |      |
| HETATM | 9254 | H4 | PRP | 628 | 38.298 | 46.008 | 36.909 | 1.00 | 0.00 |
| H      |      |    |     |     |        |        |        |      |      |
| HETATM | 9255 | O2 | PRP | 628 | 40.140 | 45.639 | 36.021 | 1.00 | 0.00 |
| O      |      |    |     |     |        |        |        |      |      |
| HETATM | 9256 | H5 | PRP | 628 | 40.540 | 45.873 | 36.862 | 1.00 | 0.00 |
| H      |      |    |     |     |        |        |        |      |      |
| HETATM | 9257 | C3 | PRP | 628 | 38.689 | 43.850 | 36.791 | 1.00 | 0.00 |
| C      |      |    |     |     |        |        |        |      |      |
| HETATM | 9258 | H6 | PRP | 628 | 39.249 | 43.134 | 36.189 | 1.00 | 0.00 |
| H      |      |    |     |     |        |        |        |      |      |
| HETATM | 9259 | H7 | PRP | 628 | 39.112 | 43.763 | 37.792 | 1.00 | 0.00 |
| H      |      |    |     |     |        |        |        |      |      |
| HETATM | 9260 | H8 | PRP | 628 | 37.614 | 43.671 | 36.821 | 1.00 | 0.00 |
| H      |      |    |     |     |        |        |        |      |      |
| HETATM | 9261 | O1 | PRP | 629 | 44.666 | 38.530 | 10.063 | 1.00 | 0.00 |
| O      |      |    |     |     |        |        |        |      |      |
| HETATM | 9262 | H1 | PRP | 629 | 45.218 | 37.782 | 10.300 | 1.00 | 0.00 |
| H      |      |    |     |     |        |        |        |      |      |
| HETATM | 9263 | C1 | PRP | 629 | 45.200 | 39.643 | 10.739 | 1.00 | 0.00 |
| C      |      |    |     |     |        |        |        |      |      |
| HETATM | 9264 | H2 | PRP | 629 | 44.426 | 40.400 | 10.614 | 1.00 | 0.00 |
| H      |      |    |     |     |        |        |        |      |      |
| HETATM | 9265 | H3 | PRP | 629 | 45.284 | 39.326 | 11.779 | 1.00 | 0.00 |
| H      |      |    |     |     |        |        |        |      |      |
| HETATM | 9266 | C2 | PRP | 629 | 46.556 | 40.165 | 10.233 | 1.00 | 0.00 |
| C      |      |    |     |     |        |        |        |      |      |
| HETATM | 9267 | H4 | PRP | 629 | 46.417 | 40.268 | 9.157  | 1.00 | 0.00 |
| H      |      |    |     |     |        |        |        |      |      |

|        |      |    |     |     |        |        |        |      |      |
|--------|------|----|-----|-----|--------|--------|--------|------|------|
| HETATM | 9268 | O2 | PRP | 629 | 47.573 | 39.243 | 10.561 | 1.00 | 0.00 |
| O      |      |    |     |     |        |        |        |      |      |
| HETATM | 9269 | H5 | PRP | 629 | 48.216 | 39.131 | 9.857  | 1.00 | 0.00 |
| H      |      |    |     |     |        |        |        |      |      |
| HETATM | 9270 | C3 | PRP | 629 | 46.987 | 41.450 | 10.944 | 1.00 | 0.00 |
| C      |      |    |     |     |        |        |        |      |      |
| HETATM | 9271 | H6 | PRP | 629 | 46.613 | 42.293 | 10.363 | 1.00 | 0.00 |
| H      |      |    |     |     |        |        |        |      |      |
| HETATM | 9272 | H7 | PRP | 629 | 46.736 | 41.474 | 12.004 | 1.00 | 0.00 |
| H      |      |    |     |     |        |        |        |      |      |
| HETATM | 9273 | H8 | PRP | 629 | 48.065 | 41.607 | 10.955 | 1.00 | 0.00 |
| H      |      |    |     |     |        |        |        |      |      |
| HETATM | 9274 | O1 | PRP | 630 | 36.073 | 50.247 | 19.035 | 1.00 | 0.00 |
| O      |      |    |     |     |        |        |        |      |      |
| HETATM | 9275 | H1 | PRP | 630 | 36.581 | 50.592 | 18.297 | 1.00 | 0.00 |
| H      |      |    |     |     |        |        |        |      |      |
| HETATM | 9276 | C1 | PRP | 630 | 34.997 | 51.137 | 19.392 | 1.00 | 0.00 |
| C      |      |    |     |     |        |        |        |      |      |
| HETATM | 9277 | H2 | PRP | 630 | 34.258 | 50.748 | 20.092 | 1.00 | 0.00 |
| H      |      |    |     |     |        |        |        |      |      |
| HETATM | 9278 | H3 | PRP | 630 | 35.438 | 51.982 | 19.921 | 1.00 | 0.00 |
| H      |      |    |     |     |        |        |        |      |      |
| HETATM | 9279 | C2 | PRP | 630 | 34.160 | 51.833 | 18.253 | 1.00 | 0.00 |
| C      |      |    |     |     |        |        |        |      |      |
| HETATM | 9280 | H4 | PRP | 630 | 33.959 | 51.071 | 17.501 | 1.00 | 0.00 |
| H      |      |    |     |     |        |        |        |      |      |
| HETATM | 9281 | O2 | PRP | 630 | 34.855 | 52.981 | 17.764 | 1.00 | 0.00 |
| O      |      |    |     |     |        |        |        |      |      |
| HETATM | 9282 | H5 | PRP | 630 | 35.804 | 52.853 | 17.694 | 1.00 | 0.00 |
| H      |      |    |     |     |        |        |        |      |      |
| HETATM | 9283 | C3 | PRP | 630 | 32.826 | 52.287 | 18.899 | 1.00 | 0.00 |
| C      |      |    |     |     |        |        |        |      |      |
| HETATM | 9284 | H6 | PRP | 630 | 32.170 | 52.821 | 18.212 | 1.00 | 0.00 |
| H      |      |    |     |     |        |        |        |      |      |
| HETATM | 9285 | H7 | PRP | 630 | 32.299 | 51.406 | 19.266 | 1.00 | 0.00 |
| H      |      |    |     |     |        |        |        |      |      |
| HETATM | 9286 | H8 | PRP | 630 | 33.001 | 52.937 | 19.756 | 1.00 | 0.00 |
| H      |      |    |     |     |        |        |        |      |      |
| HETATM | 9287 | O1 | PRP | 631 | 32.363 | 46.752 | 25.235 | 1.00 | 0.00 |
| O      |      |    |     |     |        |        |        |      |      |
| HETATM | 9288 | H1 | PRP | 631 | 32.021 | 46.735 | 26.131 | 1.00 | 0.00 |
| H      |      |    |     |     |        |        |        |      |      |
| HETATM | 9289 | C1 | PRP | 631 | 33.453 | 47.631 | 25.115 | 1.00 | 0.00 |
| C      |      |    |     |     |        |        |        |      |      |
| HETATM | 9290 | H2 | PRP | 631 | 33.204 | 48.675 | 25.305 | 1.00 | 0.00 |
| H      |      |    |     |     |        |        |        |      |      |
| HETATM | 9291 | H3 | PRP | 631 | 34.259 | 47.300 | 25.770 | 1.00 | 0.00 |
| H      |      |    |     |     |        |        |        |      |      |
| HETATM | 9292 | C2 | PRP | 631 | 34.006 | 47.503 | 23.680 | 1.00 | 0.00 |
| C      |      |    |     |     |        |        |        |      |      |
| HETATM | 9293 | H4 | PRP | 631 | 33.220 | 47.753 | 22.967 | 1.00 | 0.00 |
| H      |      |    |     |     |        |        |        |      |      |
| HETATM | 9294 | O2 | PRP | 631 | 34.420 | 46.179 | 23.536 | 1.00 | 0.00 |
| O      |      |    |     |     |        |        |        |      |      |
| HETATM | 9295 | H5 | PRP | 631 | 33.789 | 45.655 | 24.035 | 1.00 | 0.00 |
| H      |      |    |     |     |        |        |        |      |      |

|        |      |    |     |     |        |        |        |      |      |
|--------|------|----|-----|-----|--------|--------|--------|------|------|
| HETATM | 9296 | C3 | PRP | 631 | 35.235 | 48.316 | 23.378 | 1.00 | 0.00 |
| C      |      |    |     |     |        |        |        |      |      |
| HETATM | 9297 | H6 | PRP | 631 | 35.639 | 48.283 | 22.366 | 1.00 | 0.00 |
| H      |      |    |     |     |        |        |        |      |      |
| HETATM | 9298 | H7 | PRP | 631 | 34.908 | 49.349 | 23.496 | 1.00 | 0.00 |
| H      |      |    |     |     |        |        |        |      |      |
| HETATM | 9299 | H8 | PRP | 631 | 35.993 | 48.161 | 24.145 | 1.00 | 0.00 |
| H      |      |    |     |     |        |        |        |      |      |
| HETATM | 9300 | O1 | PRP | 632 | 46.419 | 57.792 | 31.935 | 1.00 | 0.00 |
| O      |      |    |     |     |        |        |        |      |      |
| HETATM | 9301 | H1 | PRP | 632 | 46.156 | 56.992 | 32.397 | 1.00 | 0.00 |
| H      |      |    |     |     |        |        |        |      |      |
| HETATM | 9302 | C1 | PRP | 632 | 45.251 | 58.520 | 31.864 | 1.00 | 0.00 |
| C      |      |    |     |     |        |        |        |      |      |
| HETATM | 9303 | H2 | PRP | 632 | 45.673 | 59.525 | 31.835 | 1.00 | 0.00 |
| H      |      |    |     |     |        |        |        |      |      |
| HETATM | 9304 | H3 | PRP | 632 | 44.645 | 58.339 | 30.977 | 1.00 | 0.00 |
| H      |      |    |     |     |        |        |        |      |      |
| HETATM | 9305 | C2 | PRP | 632 | 44.452 | 58.426 | 33.121 | 1.00 | 0.00 |
| C      |      |    |     |     |        |        |        |      |      |
| HETATM | 9306 | H4 | PRP | 632 | 45.125 | 58.779 | 33.903 | 1.00 | 0.00 |
| H      |      |    |     |     |        |        |        |      |      |
| HETATM | 9307 | O2 | PRP | 632 | 43.952 | 57.146 | 33.365 | 1.00 | 0.00 |
| O      |      |    |     |     |        |        |        |      |      |
| HETATM | 9308 | H5 | PRP | 632 | 43.381 | 57.095 | 34.135 | 1.00 | 0.00 |
| H      |      |    |     |     |        |        |        |      |      |
| HETATM | 9309 | C3 | PRP | 632 | 43.279 | 59.420 | 33.165 | 1.00 | 0.00 |
| C      |      |    |     |     |        |        |        |      |      |
| HETATM | 9310 | H6 | PRP | 632 | 42.633 | 59.343 | 34.039 | 1.00 | 0.00 |
| H      |      |    |     |     |        |        |        |      |      |
| HETATM | 9311 | H7 | PRP | 632 | 43.620 | 60.451 | 33.068 | 1.00 | 0.00 |
| H      |      |    |     |     |        |        |        |      |      |
| HETATM | 9312 | H8 | PRP | 632 | 42.627 | 59.210 | 32.317 | 1.00 | 0.00 |
| H      |      |    |     |     |        |        |        |      |      |
| HETATM | 9313 | O1 | PRP | 633 | 44.459 | 34.294 | 16.592 | 1.00 | 0.00 |
| O      |      |    |     |     |        |        |        |      |      |
| HETATM | 9314 | H1 | PRP | 633 | 44.498 | 33.585 | 15.945 | 1.00 | 0.00 |
| H      |      |    |     |     |        |        |        |      |      |
| HETATM | 9315 | C1 | PRP | 633 | 45.166 | 35.331 | 15.942 | 1.00 | 0.00 |
| C      |      |    |     |     |        |        |        |      |      |
| HETATM | 9316 | H2 | PRP | 633 | 44.658 | 36.260 | 16.201 | 1.00 | 0.00 |
| H      |      |    |     |     |        |        |        |      |      |
| HETATM | 9317 | H3 | PRP | 633 | 46.217 | 35.289 | 16.229 | 1.00 | 0.00 |
| H      |      |    |     |     |        |        |        |      |      |
| HETATM | 9318 | C2 | PRP | 633 | 45.045 | 35.275 | 14.448 | 1.00 | 0.00 |
| C      |      |    |     |     |        |        |        |      |      |
| HETATM | 9319 | H4 | PRP | 633 | 44.045 | 34.926 | 14.192 | 1.00 | 0.00 |
| H      |      |    |     |     |        |        |        |      |      |
| HETATM | 9320 | O2 | PRP | 633 | 45.893 | 34.295 | 13.921 | 1.00 | 0.00 |
| O      |      |    |     |     |        |        |        |      |      |
| HETATM | 9321 | H5 | PRP | 633 | 46.591 | 34.100 | 14.550 | 1.00 | 0.00 |
| H      |      |    |     |     |        |        |        |      |      |
| HETATM | 9322 | C3 | PRP | 633 | 45.415 | 36.669 | 13.809 | 1.00 | 0.00 |
| C      |      |    |     |     |        |        |        |      |      |
| HETATM | 9323 | H6 | PRP | 633 | 46.380 | 36.659 | 13.301 | 1.00 | 0.00 |
| H      |      |    |     |     |        |        |        |      |      |



|        |      |    |     |     |        |        |        |      |      |
|--------|------|----|-----|-----|--------|--------|--------|------|------|
| HETATM | 9324 | H7 | PRP | 633 | 44.568 | 36.999 | 13.208 | 1.00 | 0.00 |
| H      |      |    |     |     |        |        |        |      |      |
| HETATM | 9325 | H8 | PRP | 633 | 45.375 | 37.420 | 14.597 | 1.00 | 0.00 |
| H      |      |    |     |     |        |        |        |      |      |
| HETATM | 9326 | O1 | PRP | 634 | 47.800 | 40.223 | 20.861 | 1.00 | 0.00 |
| O      |      |    |     |     |        |        |        |      |      |
| HETATM | 9327 | H1 | PRP | 634 | 47.852 | 39.302 | 21.126 | 1.00 | 0.00 |
| H      |      |    |     |     |        |        |        |      |      |
| HETATM | 9328 | C1 | PRP | 634 | 47.380 | 40.117 | 19.491 | 1.00 | 0.00 |
| C      |      |    |     |     |        |        |        |      |      |
| HETATM | 9329 | H2 | PRP | 634 | 46.845 | 40.982 | 19.097 | 1.00 | 0.00 |
| H      |      |    |     |     |        |        |        |      |      |
| HETATM | 9330 | H3 | PRP | 634 | 48.178 | 39.762 | 18.839 | 1.00 | 0.00 |
| H      |      |    |     |     |        |        |        |      |      |
| HETATM | 9331 | C2 | PRP | 634 | 46.441 | 38.923 | 19.791 | 1.00 | 0.00 |
| C      |      |    |     |     |        |        |        |      |      |
| HETATM | 9332 | H4 | PRP | 634 | 45.688 | 39.185 | 20.535 | 1.00 | 0.00 |
| H      |      |    |     |     |        |        |        |      |      |
| HETATM | 9333 | O2 | PRP | 634 | 47.162 | 37.828 | 20.374 | 1.00 | 0.00 |
| O      |      |    |     |     |        |        |        |      |      |
| HETATM | 9334 | H5 | PRP | 634 | 46.567 | 37.075 | 20.406 | 1.00 | 0.00 |
| H      |      |    |     |     |        |        |        |      |      |
| HETATM | 9335 | C3 | PRP | 634 | 45.666 | 38.559 | 18.609 | 1.00 | 0.00 |
| C      |      |    |     |     |        |        |        |      |      |
| HETATM | 9336 | H6 | PRP | 634 | 45.063 | 37.655 | 18.701 | 1.00 | 0.00 |
| H      |      |    |     |     |        |        |        |      |      |
| HETATM | 9337 | H7 | PRP | 634 | 45.049 | 39.348 | 18.179 | 1.00 | 0.00 |
| H      |      |    |     |     |        |        |        |      |      |
| HETATM | 9338 | H8 | PRP | 634 | 46.345 | 38.308 | 17.794 | 1.00 | 0.00 |
| H      |      |    |     |     |        |        |        |      |      |
| HETATM | 9339 | O1 | PRP | 635 | 29.817 | 46.231 | 14.313 | 1.00 | 0.00 |
| O      |      |    |     |     |        |        |        |      |      |
| HETATM | 9340 | H1 | PRP | 635 | 29.393 | 45.375 | 14.217 | 1.00 | 0.00 |
| H      |      |    |     |     |        |        |        |      |      |
| HETATM | 9341 | C1 | PRP | 635 | 29.784 | 46.804 | 15.614 | 1.00 | 0.00 |
| C      |      |    |     |     |        |        |        |      |      |
| HETATM | 9342 | H2 | PRP | 635 | 29.158 | 47.692 | 15.692 | 1.00 | 0.00 |
| H      |      |    |     |     |        |        |        |      |      |
| HETATM | 9343 | H3 | PRP | 635 | 29.269 | 46.112 | 16.280 | 1.00 | 0.00 |
| H      |      |    |     |     |        |        |        |      |      |
| HETATM | 9344 | C2 | PRP | 635 | 31.191 | 47.095 | 16.002 | 1.00 | 0.00 |
| C      |      |    |     |     |        |        |        |      |      |
| HETATM | 9345 | H4 | PRP | 635 | 31.737 | 46.330 | 15.450 | 1.00 | 0.00 |
| H      |      |    |     |     |        |        |        |      |      |
| HETATM | 9346 | O2 | PRP | 635 | 31.311 | 46.884 | 17.428 | 1.00 | 0.00 |
| O      |      |    |     |     |        |        |        |      |      |
| HETATM | 9347 | H5 | PRP | 635 | 32.105 | 46.366 | 17.580 | 1.00 | 0.00 |
| H      |      |    |     |     |        |        |        |      |      |
| HETATM | 9348 | C3 | PRP | 635 | 31.591 | 48.565 | 15.632 | 1.00 | 0.00 |
| C      |      |    |     |     |        |        |        |      |      |
| HETATM | 9349 | H6 | PRP | 635 | 31.573 | 48.771 | 14.562 | 1.00 | 0.00 |
| H      |      |    |     |     |        |        |        |      |      |
| HETATM | 9350 | H7 | PRP | 635 | 30.910 | 49.265 | 16.118 | 1.00 | 0.00 |
| H      |      |    |     |     |        |        |        |      |      |
| HETATM | 9351 | H8 | PRP | 635 | 32.614 | 48.724 | 15.973 | 1.00 | 0.00 |
| H      |      |    |     |     |        |        |        |      |      |

|        |      |    |     |     |        |        |        |      |      |
|--------|------|----|-----|-----|--------|--------|--------|------|------|
| HETATM | 9352 | O1 | PRP | 636 | 38.265 | 45.348 | 25.957 | 1.00 | 0.00 |
| O      |      |    |     |     |        |        |        |      |      |
| HETATM | 9353 | H1 | PRP | 636 | 38.466 | 44.439 | 25.725 | 1.00 | 0.00 |
| H      |      |    |     |     |        |        |        |      |      |
| HETATM | 9354 | C1 | PRP | 636 | 37.792 | 45.959 | 24.672 | 1.00 | 0.00 |
| C      |      |    |     |     |        |        |        |      |      |
| HETATM | 9355 | H2 | PRP | 636 | 36.915 | 45.389 | 24.364 | 1.00 | 0.00 |
| H      |      |    |     |     |        |        |        |      |      |
| HETATM | 9356 | H3 | PRP | 636 | 37.574 | 47.016 | 24.820 | 1.00 | 0.00 |
| H      |      |    |     |     |        |        |        |      |      |
| HETATM | 9357 | C2 | PRP | 636 | 38.875 | 45.910 | 23.588 | 1.00 | 0.00 |
| C      |      |    |     |     |        |        |        |      |      |
| HETATM | 9358 | H4 | PRP | 636 | 39.285 | 44.903 | 23.665 | 1.00 | 0.00 |
| H      |      |    |     |     |        |        |        |      |      |
| HETATM | 9359 | O2 | PRP | 636 | 39.862 | 46.920 | 23.755 | 1.00 | 0.00 |
| O      |      |    |     |     |        |        |        |      |      |
| HETATM | 9360 | H5 | PRP | 636 | 40.375 | 46.520 | 24.461 | 1.00 | 0.00 |
| H      |      |    |     |     |        |        |        |      |      |
| HETATM | 9361 | C3 | PRP | 636 | 38.250 | 46.096 | 22.273 | 1.00 | 0.00 |
| C      |      |    |     |     |        |        |        |      |      |
| HETATM | 9362 | H6 | PRP | 636 | 37.482 | 45.322 | 22.269 | 1.00 | 0.00 |
| H      |      |    |     |     |        |        |        |      |      |
| HETATM | 9363 | H7 | PRP | 636 | 37.785 | 47.071 | 22.126 | 1.00 | 0.00 |
| H      |      |    |     |     |        |        |        |      |      |
| HETATM | 9364 | H8 | PRP | 636 | 38.972 | 45.971 | 21.466 | 1.00 | 0.00 |
| H      |      |    |     |     |        |        |        |      |      |
| HETATM | 9365 | O1 | PRP | 637 | 48.209 | 25.861 | 19.976 | 1.00 | 0.00 |
| O      |      |    |     |     |        |        |        |      |      |
| HETATM | 9366 | H1 | PRP | 637 | 48.965 | 25.753 | 20.558 | 1.00 | 0.00 |
| H      |      |    |     |     |        |        |        |      |      |
| HETATM | 9367 | C1 | PRP | 637 | 47.600 | 27.061 | 20.070 | 1.00 | 0.00 |
| C      |      |    |     |     |        |        |        |      |      |
| HETATM | 9368 | H2 | PRP | 637 | 46.564 | 26.826 | 19.826 | 1.00 | 0.00 |
| H      |      |    |     |     |        |        |        |      |      |
| HETATM | 9369 | H3 | PRP | 637 | 47.690 | 27.404 | 21.100 | 1.00 | 0.00 |
| H      |      |    |     |     |        |        |        |      |      |
| HETATM | 9370 | C2 | PRP | 637 | 48.056 | 28.070 | 19.064 | 1.00 | 0.00 |
| C      |      |    |     |     |        |        |        |      |      |
| HETATM | 9371 | H4 | PRP | 637 | 48.313 | 27.626 | 18.102 | 1.00 | 0.00 |
| H      |      |    |     |     |        |        |        |      |      |
| HETATM | 9372 | O2 | PRP | 637 | 49.238 | 28.718 | 19.470 | 1.00 | 0.00 |
| O      |      |    |     |     |        |        |        |      |      |
| HETATM | 9373 | H5 | PRP | 637 | 49.400 | 28.397 | 20.360 | 1.00 | 0.00 |
| H      |      |    |     |     |        |        |        |      |      |
| HETATM | 9374 | C3 | PRP | 637 | 47.026 | 29.118 | 18.700 | 1.00 | 0.00 |
| C      |      |    |     |     |        |        |        |      |      |
| HETATM | 9375 | H6 | PRP | 637 | 46.811 | 29.850 | 19.479 | 1.00 | 0.00 |
| H      |      |    |     |     |        |        |        |      |      |
| HETATM | 9376 | H7 | PRP | 637 | 47.466 | 29.805 | 17.976 | 1.00 | 0.00 |
| H      |      |    |     |     |        |        |        |      |      |
| HETATM | 9377 | H8 | PRP | 637 | 46.076 | 28.716 | 18.350 | 1.00 | 0.00 |
| H      |      |    |     |     |        |        |        |      |      |
| HETATM | 9378 | O1 | PRP | 638 | 46.367 | 47.192 | 25.616 | 1.00 | 0.00 |
| O      |      |    |     |     |        |        |        |      |      |
| HETATM | 9379 | H1 | PRP | 638 | 45.953 | 46.520 | 25.069 | 1.00 | 0.00 |
| H      |      |    |     |     |        |        |        |      |      |

|        |      |    |     |     |        |        |        |      |      |
|--------|------|----|-----|-----|--------|--------|--------|------|------|
| HETATM | 9380 | C1 | PRP | 638 | 45.738 | 47.197 | 26.869 | 1.00 | 0.00 |
| C      |      |    |     |     |        |        |        |      |      |
| HETATM | 9381 | H2 | PRP | 638 | 46.208 | 47.952 | 27.499 | 1.00 | 0.00 |
| H      |      |    |     |     |        |        |        |      |      |
| HETATM | 9382 | H3 | PRP | 638 | 44.693 | 47.485 | 26.761 | 1.00 | 0.00 |
| H      |      |    |     |     |        |        |        |      |      |
| HETATM | 9383 | C2 | PRP | 638 | 45.826 | 45.844 | 27.578 | 1.00 | 0.00 |
| C      |      |    |     |     |        |        |        |      |      |
| HETATM | 9384 | H4 | PRP | 638 | 46.831 | 45.426 | 27.525 | 1.00 | 0.00 |
| H      |      |    |     |     |        |        |        |      |      |
| HETATM | 9385 | O2 | PRP | 638 | 44.904 | 44.912 | 27.109 | 1.00 | 0.00 |
| O      |      |    |     |     |        |        |        |      |      |
| HETATM | 9386 | H5 | PRP | 638 | 45.154 | 44.666 | 26.215 | 1.00 | 0.00 |
| H      |      |    |     |     |        |        |        |      |      |
| HETATM | 9387 | C3 | PRP | 638 | 45.551 | 46.239 | 29.061 | 1.00 | 0.00 |
| C      |      |    |     |     |        |        |        |      |      |
| HETATM | 9388 | H6 | PRP | 638 | 44.635 | 46.819 | 29.171 | 1.00 | 0.00 |
| H      |      |    |     |     |        |        |        |      |      |
| HETATM | 9389 | H7 | PRP | 638 | 45.461 | 45.317 | 29.636 | 1.00 | 0.00 |
| H      |      |    |     |     |        |        |        |      |      |
| HETATM | 9390 | H8 | PRP | 638 | 46.381 | 46.798 | 29.494 | 1.00 | 0.00 |
| H      |      |    |     |     |        |        |        |      |      |
| HETATM | 9391 | O1 | PRP | 639 | 14.473 | 50.387 | 22.048 | 1.00 | 0.00 |
| O      |      |    |     |     |        |        |        |      |      |
| HETATM | 9392 | H1 | PRP | 639 | 13.924 | 49.993 | 22.730 | 1.00 | 0.00 |
| H      |      |    |     |     |        |        |        |      |      |
| HETATM | 9393 | C1 | PRP | 639 | 14.725 | 49.496 | 21.030 | 1.00 | 0.00 |
| C      |      |    |     |     |        |        |        |      |      |
| HETATM | 9394 | H2 | PRP | 639 | 15.524 | 48.789 | 21.254 | 1.00 | 0.00 |
| H      |      |    |     |     |        |        |        |      |      |
| HETATM | 9395 | H3 | PRP | 639 | 13.824 | 48.931 | 20.790 | 1.00 | 0.00 |
| H      |      |    |     |     |        |        |        |      |      |
| HETATM | 9396 | C2 | PRP | 639 | 14.925 | 50.216 | 19.656 | 1.00 | 0.00 |
| C      |      |    |     |     |        |        |        |      |      |
| HETATM | 9397 | H4 | PRP | 639 | 15.525 | 51.120 | 19.763 | 1.00 | 0.00 |
| H      |      |    |     |     |        |        |        |      |      |
| HETATM | 9398 | O2 | PRP | 639 | 13.664 | 50.483 | 18.987 | 1.00 | 0.00 |
| O      |      |    |     |     |        |        |        |      |      |
| HETATM | 9399 | H5 | PRP | 639 | 13.088 | 50.793 | 19.689 | 1.00 | 0.00 |
| H      |      |    |     |     |        |        |        |      |      |
| HETATM | 9400 | C3 | PRP | 639 | 15.640 | 49.108 | 18.783 | 1.00 | 0.00 |
| C      |      |    |     |     |        |        |        |      |      |
| HETATM | 9401 | H6 | PRP | 639 | 16.717 | 49.030 | 18.929 | 1.00 | 0.00 |
| H      |      |    |     |     |        |        |        |      |      |
| HETATM | 9402 | H7 | PRP | 639 | 15.249 | 48.121 | 19.030 | 1.00 | 0.00 |
| H      |      |    |     |     |        |        |        |      |      |
| HETATM | 9403 | H8 | PRP | 639 | 15.369 | 49.360 | 17.757 | 1.00 | 0.00 |
| H      |      |    |     |     |        |        |        |      |      |
| HETATM | 9404 | O1 | PRP | 640 | 13.180 | 54.714 | 23.627 | 1.00 | 0.00 |
| O      |      |    |     |     |        |        |        |      |      |
| HETATM | 9405 | H1 | PRP | 640 | 13.847 | 55.320 | 23.958 | 1.00 | 0.00 |
| H      |      |    |     |     |        |        |        |      |      |
| HETATM | 9406 | C1 | PRP | 640 | 13.357 | 54.839 | 22.274 | 1.00 | 0.00 |
| C      |      |    |     |     |        |        |        |      |      |
| HETATM | 9407 | H2 | PRP | 640 | 12.435 | 54.472 | 21.824 | 1.00 | 0.00 |
| H      |      |    |     |     |        |        |        |      |      |

|        |      |    |     |     |        |        |        |      |      |
|--------|------|----|-----|-----|--------|--------|--------|------|------|
| HETATM | 9408 | H3 | PRP | 640 | 13.485 | 55.892 | 22.022 | 1.00 | 0.00 |
| H      |      |    |     |     |        |        |        |      |      |
| HETATM | 9409 | C2 | PRP | 640 | 14.557 | 54.012 | 21.827 | 1.00 | 0.00 |
| C      |      |    |     |     |        |        |        |      |      |
| HETATM | 9410 | H4 | PRP | 640 | 14.573 | 53.021 | 22.279 | 1.00 | 0.00 |
| H      |      |    |     |     |        |        |        |      |      |
| HETATM | 9411 | O2 | PRP | 640 | 15.755 | 54.709 | 22.230 | 1.00 | 0.00 |
| O      |      |    |     |     |        |        |        |      |      |
| HETATM | 9412 | H5 | PRP | 640 | 16.551 | 54.276 | 21.913 | 1.00 | 0.00 |
| H      |      |    |     |     |        |        |        |      |      |
| HETATM | 9413 | C3 | PRP | 640 | 14.600 | 53.921 | 20.286 | 1.00 | 0.00 |
| C      |      |    |     |     |        |        |        |      |      |
| HETATM | 9414 | H6 | PRP | 640 | 15.524 | 53.474 | 19.919 | 1.00 | 0.00 |
| H      |      |    |     |     |        |        |        |      |      |
| HETATM | 9415 | H7 | PRP | 640 | 13.795 | 53.268 | 19.947 | 1.00 | 0.00 |
| H      |      |    |     |     |        |        |        |      |      |
| HETATM | 9416 | H8 | PRP | 640 | 14.557 | 54.900 | 19.810 | 1.00 | 0.00 |
| H      |      |    |     |     |        |        |        |      |      |
| HETATM | 9417 | O1 | PRP | 641 | 18.380 | 54.980 | 27.821 | 1.00 | 0.00 |
| O      |      |    |     |     |        |        |        |      |      |
| HETATM | 9418 | H1 | PRP | 641 | 17.816 | 54.993 | 28.598 | 1.00 | 0.00 |
| H      |      |    |     |     |        |        |        |      |      |
| HETATM | 9419 | C1 | PRP | 641 | 19.414 | 55.981 | 27.960 | 1.00 | 0.00 |
| C      |      |    |     |     |        |        |        |      |      |
| HETATM | 9420 | H2 | PRP | 641 | 18.892 | 56.822 | 28.418 | 1.00 | 0.00 |
| H      |      |    |     |     |        |        |        |      |      |
| HETATM | 9421 | H3 | PRP | 641 | 20.170 | 55.541 | 28.611 | 1.00 | 0.00 |
| H      |      |    |     |     |        |        |        |      |      |
| HETATM | 9422 | C2 | PRP | 641 | 20.018 | 56.319 | 26.622 | 1.00 | 0.00 |
| C      |      |    |     |     |        |        |        |      |      |
| HETATM | 9423 | H4 | PRP | 641 | 20.681 | 57.180 | 26.714 | 1.00 | 0.00 |
| H      |      |    |     |     |        |        |        |      |      |
| HETATM | 9424 | O2 | PRP | 641 | 18.952 | 56.698 | 25.820 | 1.00 | 0.00 |
| O      |      |    |     |     |        |        |        |      |      |
| HETATM | 9425 | H5 | PRP | 641 | 18.271 | 56.030 | 25.933 | 1.00 | 0.00 |
| H      |      |    |     |     |        |        |        |      |      |
| HETATM | 9426 | C3 | PRP | 641 | 20.872 | 55.248 | 25.896 | 1.00 | 0.00 |
| C      |      |    |     |     |        |        |        |      |      |
| HETATM | 9427 | H6 | PRP | 641 | 20.326 | 54.305 | 25.932 | 1.00 | 0.00 |
| H      |      |    |     |     |        |        |        |      |      |
| HETATM | 9428 | H7 | PRP | 641 | 21.138 | 55.533 | 24.878 | 1.00 | 0.00 |
| H      |      |    |     |     |        |        |        |      |      |
| HETATM | 9429 | H8 | PRP | 641 | 21.784 | 55.006 | 26.441 | 1.00 | 0.00 |
| H      |      |    |     |     |        |        |        |      |      |
| HETATM | 9430 | O1 | PRP | 642 | 40.345 | 61.916 | 11.870 | 1.00 | 0.00 |
| O      |      |    |     |     |        |        |        |      |      |
| HETATM | 9431 | H1 | PRP | 642 | 40.997 | 61.736 | 11.190 | 1.00 | 0.00 |
| H      |      |    |     |     |        |        |        |      |      |
| HETATM | 9432 | C1 | PRP | 642 | 39.636 | 63.041 | 11.445 | 1.00 | 0.00 |
| C      |      |    |     |     |        |        |        |      |      |
| HETATM | 9433 | H2 | PRP | 642 | 40.287 | 63.828 | 11.063 | 1.00 | 0.00 |
| H      |      |    |     |     |        |        |        |      |      |
| HETATM | 9434 | H3 | PRP | 642 | 38.887 | 62.767 | 10.702 | 1.00 | 0.00 |
| H      |      |    |     |     |        |        |        |      |      |
| HETATM | 9435 | C2 | PRP | 642 | 38.968 | 63.666 | 12.690 | 1.00 | 0.00 |
| C      |      |    |     |     |        |        |        |      |      |

|        |      |    |     |     |        |        |        |      |      |
|--------|------|----|-----|-----|--------|--------|--------|------|------|
| HETATM | 9436 | H4 | PRP | 642 | 38.674 | 64.670 | 12.383 | 1.00 | 0.00 |
| H      |      |    |     |     |        |        |        |      |      |
| HETATM | 9437 | O2 | PRP | 642 | 39.894 | 63.785 | 13.693 | 1.00 | 0.00 |
| O      |      |    |     |     |        |        |        |      |      |
| HETATM | 9438 | H5 | PRP | 642 | 40.590 | 63.185 | 13.416 | 1.00 | 0.00 |
| H      |      |    |     |     |        |        |        |      |      |
| HETATM | 9439 | C3 | PRP | 642 | 37.721 | 62.949 | 13.059 | 1.00 | 0.00 |
| C      |      |    |     |     |        |        |        |      |      |
| HETATM | 9440 | H6 | PRP | 642 | 37.700 | 62.508 | 14.056 | 1.00 | 0.00 |
| H      |      |    |     |     |        |        |        |      |      |
| HETATM | 9441 | H7 | PRP | 642 | 37.007 | 63.736 | 13.304 | 1.00 | 0.00 |
| H      |      |    |     |     |        |        |        |      |      |
| HETATM | 9442 | H8 | PRP | 642 | 37.340 | 62.223 | 12.341 | 1.00 | 0.00 |
| H      |      |    |     |     |        |        |        |      |      |
| HETATM | 9443 | O1 | PRP | 643 | 4.020  | 49.054 | 14.204 | 1.00 | 0.00 |
| O      |      |    |     |     |        |        |        |      |      |
| HETATM | 9444 | H1 | PRP | 643 | 3.698  | 49.912 | 14.491 | 1.00 | 0.00 |
| H      |      |    |     |     |        |        |        |      |      |
| HETATM | 9445 | C1 | PRP | 643 | 3.380  | 48.149 | 15.066 | 1.00 | 0.00 |
| C      |      |    |     |     |        |        |        |      |      |
| HETATM | 9446 | H2 | PRP | 643 | 2.413  | 48.094 | 14.567 | 1.00 | 0.00 |
| H      |      |    |     |     |        |        |        |      |      |
| HETATM | 9447 | H3 | PRP | 643 | 3.916  | 47.206 | 15.175 | 1.00 | 0.00 |
| H      |      |    |     |     |        |        |        |      |      |
| HETATM | 9448 | C2 | PRP | 643 | 3.177  | 48.695 | 16.480 | 1.00 | 0.00 |
| C      |      |    |     |     |        |        |        |      |      |
| HETATM | 9449 | H4 | PRP | 643 | 2.675  | 47.899 | 17.031 | 1.00 | 0.00 |
| H      |      |    |     |     |        |        |        |      |      |
| HETATM | 9450 | O2 | PRP | 643 | 2.404  | 49.830 | 16.534 | 1.00 | 0.00 |
| O      |      |    |     |     |        |        |        |      |      |
| HETATM | 9451 | H5 | PRP | 643 | 1.511  | 49.516 | 16.696 | 1.00 | 0.00 |
| H      |      |    |     |     |        |        |        |      |      |
| HETATM | 9452 | C3 | PRP | 643 | 4.461  | 48.779 | 17.266 | 1.00 | 0.00 |
| C      |      |    |     |     |        |        |        |      |      |
| HETATM | 9453 | H6 | PRP | 643 | 4.289  | 49.402 | 18.144 | 1.00 | 0.00 |
| H      |      |    |     |     |        |        |        |      |      |
| HETATM | 9454 | H7 | PRP | 643 | 4.840  | 47.769 | 17.425 | 1.00 | 0.00 |
| H      |      |    |     |     |        |        |        |      |      |
| HETATM | 9455 | H8 | PRP | 643 | 5.262  | 49.127 | 16.614 | 1.00 | 0.00 |
| H      |      |    |     |     |        |        |        |      |      |
| HETATM | 9456 | O1 | PRP | 644 | 26.391 | 47.641 | 11.632 | 1.00 | 0.00 |
| O      |      |    |     |     |        |        |        |      |      |
| HETATM | 9457 | H1 | PRP | 644 | 26.199 | 48.233 | 10.901 | 1.00 | 0.00 |
| H      |      |    |     |     |        |        |        |      |      |
| HETATM | 9458 | C1 | PRP | 644 | 25.314 | 47.063 | 12.285 | 1.00 | 0.00 |
| C      |      |    |     |     |        |        |        |      |      |
| HETATM | 9459 | H2 | PRP | 644 | 25.517 | 46.036 | 12.588 | 1.00 | 0.00 |
| H      |      |    |     |     |        |        |        |      |      |
| HETATM | 9460 | H3 | PRP | 644 | 25.040 | 47.652 | 13.161 | 1.00 | 0.00 |
| H      |      |    |     |     |        |        |        |      |      |
| HETATM | 9461 | C2 | PRP | 644 | 24.071 | 46.942 | 11.300 | 1.00 | 0.00 |
| C      |      |    |     |     |        |        |        |      |      |
| HETATM | 9462 | H4 | PRP | 644 | 24.405 | 46.934 | 10.262 | 1.00 | 0.00 |
| H      |      |    |     |     |        |        |        |      |      |
| HETATM | 9463 | O2 | PRP | 644 | 23.228 | 48.072 | 11.507 | 1.00 | 0.00 |
| O      |      |    |     |     |        |        |        |      |      |

|        |      |    |     |     |        |        |        |      |      |
|--------|------|----|-----|-----|--------|--------|--------|------|------|
| HETATM | 9464 | H5 | PRP | 644 | 23.703 | 48.738 | 11.004 | 1.00 | 0.00 |
| H      |      |    |     |     |        |        |        |      |      |
| HETATM | 9465 | C3 | PRP | 644 | 23.164 | 45.699 | 11.510 | 1.00 | 0.00 |
| C      |      |    |     |     |        |        |        |      |      |
| HETATM | 9466 | H6 | PRP | 644 | 22.432 | 45.687 | 10.702 | 1.00 | 0.00 |
| H      |      |    |     |     |        |        |        |      |      |
| HETATM | 9467 | H7 | PRP | 644 | 23.763 | 44.797 | 11.384 | 1.00 | 0.00 |
| H      |      |    |     |     |        |        |        |      |      |
| HETATM | 9468 | H8 | PRP | 644 | 22.730 | 45.651 | 12.508 | 1.00 | 0.00 |
| H      |      |    |     |     |        |        |        |      |      |
| HETATM | 9469 | O1 | PRP | 645 | 20.992 | 49.464 | 22.967 | 1.00 | 0.00 |
| O      |      |    |     |     |        |        |        |      |      |
| HETATM | 9470 | H1 | PRP | 645 | 21.063 | 49.792 | 22.067 | 1.00 | 0.00 |
| H      |      |    |     |     |        |        |        |      |      |
| HETATM | 9471 | C1 | PRP | 645 | 19.660 | 49.876 | 23.350 | 1.00 | 0.00 |
| C      |      |    |     |     |        |        |        |      |      |
| HETATM | 9472 | H2 | PRP | 645 | 19.149 | 49.170 | 24.004 | 1.00 | 0.00 |
| H      |      |    |     |     |        |        |        |      |      |
| HETATM | 9473 | H3 | PRP | 645 | 19.843 | 50.706 | 24.033 | 1.00 | 0.00 |
| H      |      |    |     |     |        |        |        |      |      |
| HETATM | 9474 | C2 | PRP | 645 | 18.790 | 50.317 | 22.152 | 1.00 | 0.00 |
| C      |      |    |     |     |        |        |        |      |      |
| HETATM | 9475 | H4 | PRP | 645 | 18.454 | 49.402 | 21.664 | 1.00 | 0.00 |
| H      |      |    |     |     |        |        |        |      |      |
| HETATM | 9476 | O2 | PRP | 645 | 19.731 | 51.045 | 21.299 | 1.00 | 0.00 |
| O      |      |    |     |     |        |        |        |      |      |
| HETATM | 9477 | H5 | PRP | 645 | 19.544 | 50.884 | 20.372 | 1.00 | 0.00 |
| H      |      |    |     |     |        |        |        |      |      |
| HETATM | 9478 | C3 | PRP | 645 | 17.478 | 51.149 | 22.471 | 1.00 | 0.00 |
| C      |      |    |     |     |        |        |        |      |      |
| HETATM | 9479 | H6 | PRP | 645 | 16.937 | 51.375 | 21.552 | 1.00 | 0.00 |
| H      |      |    |     |     |        |        |        |      |      |
| HETATM | 9480 | H7 | PRP | 645 | 16.801 | 50.590 | 23.117 | 1.00 | 0.00 |
| H      |      |    |     |     |        |        |        |      |      |
| HETATM | 9481 | H8 | PRP | 645 | 17.737 | 52.030 | 23.058 | 1.00 | 0.00 |
| H      |      |    |     |     |        |        |        |      |      |
| HETATM | 9482 | O1 | PRP | 646 | 35.785 | 51.369 | 28.339 | 1.00 | 0.00 |
| O      |      |    |     |     |        |        |        |      |      |
| HETATM | 9483 | H1 | PRP | 646 | 35.367 | 52.232 | 28.387 | 1.00 | 0.00 |
| H      |      |    |     |     |        |        |        |      |      |
| HETATM | 9484 | C1 | PRP | 646 | 37.133 | 51.515 | 27.995 | 1.00 | 0.00 |
| C      |      |    |     |     |        |        |        |      |      |
| HETATM | 9485 | H2 | PRP | 646 | 37.237 | 51.081 | 27.001 | 1.00 | 0.00 |
| H      |      |    |     |     |        |        |        |      |      |
| HETATM | 9486 | H3 | PRP | 646 | 37.358 | 52.582 | 27.972 | 1.00 | 0.00 |
| H      |      |    |     |     |        |        |        |      |      |
| HETATM | 9487 | C2 | PRP | 646 | 38.057 | 50.810 | 29.080 | 1.00 | 0.00 |
| C      |      |    |     |     |        |        |        |      |      |
| HETATM | 9488 | H4 | PRP | 646 | 37.803 | 49.761 | 29.235 | 1.00 | 0.00 |
| H      |      |    |     |     |        |        |        |      |      |
| HETATM | 9489 | O2 | PRP | 646 | 37.968 | 51.409 | 30.345 | 1.00 | 0.00 |
| O      |      |    |     |     |        |        |        |      |      |
| HETATM | 9490 | H5 | PRP | 646 | 37.043 | 51.289 | 30.572 | 1.00 | 0.00 |
| H      |      |    |     |     |        |        |        |      |      |
| HETATM | 9491 | C3 | PRP | 646 | 39.523 | 51.012 | 28.526 | 1.00 | 0.00 |
| C      |      |    |     |     |        |        |        |      |      |

|        |      |    |     |     |        |        |        |      |      |
|--------|------|----|-----|-----|--------|--------|--------|------|------|
| HETATM | 9492 | H6 | PRP | 646 | 39.567 | 52.044 | 28.180 | 1.00 | 0.00 |
| H      |      |    |     |     |        |        |        |      |      |
| HETATM | 9493 | H7 | PRP | 646 | 40.318 | 50.978 | 29.272 | 1.00 | 0.00 |
| H      |      |    |     |     |        |        |        |      |      |
| HETATM | 9494 | H8 | PRP | 646 | 39.699 | 50.466 | 27.599 | 1.00 | 0.00 |
| H      |      |    |     |     |        |        |        |      |      |
| HETATM | 9495 | O1 | PRP | 647 | 27.001 | 58.268 | 19.992 | 1.00 | 0.00 |
| O      |      |    |     |     |        |        |        |      |      |
| HETATM | 9496 | H1 | PRP | 647 | 27.958 | 58.225 | 19.923 | 1.00 | 0.00 |
| H      |      |    |     |     |        |        |        |      |      |
| HETATM | 9497 | C1 | PRP | 647 | 26.655 | 56.894 | 19.971 | 1.00 | 0.00 |
| C      |      |    |     |     |        |        |        |      |      |
| HETATM | 9498 | H2 | PRP | 647 | 26.105 | 56.575 | 20.855 | 1.00 | 0.00 |
| H      |      |    |     |     |        |        |        |      |      |
| HETATM | 9499 | H3 | PRP | 647 | 25.925 | 56.656 | 19.197 | 1.00 | 0.00 |
| H      |      |    |     |     |        |        |        |      |      |
| HETATM | 9500 | C2 | PRP | 647 | 27.855 | 56.039 | 19.624 | 1.00 | 0.00 |
| C      |      |    |     |     |        |        |        |      |      |
| HETATM | 9501 | H4 | PRP | 647 | 27.689 | 54.992 | 19.875 | 1.00 | 0.00 |
| H      |      |    |     |     |        |        |        |      |      |
| HETATM | 9502 | O2 | PRP | 647 | 28.953 | 56.419 | 20.499 | 1.00 | 0.00 |
| O      |      |    |     |     |        |        |        |      |      |
| HETATM | 9503 | H5 | PRP | 647 | 28.695 | 56.160 | 21.386 | 1.00 | 0.00 |
| H      |      |    |     |     |        |        |        |      |      |
| HETATM | 9504 | C3 | PRP | 647 | 28.365 | 56.086 | 18.173 | 1.00 | 0.00 |
| C      |      |    |     |     |        |        |        |      |      |
| HETATM | 9505 | H6 | PRP | 647 | 29.038 | 55.259 | 17.946 | 1.00 | 0.00 |
| H      |      |    |     |     |        |        |        |      |      |
| HETATM | 9506 | H7 | PRP | 647 | 27.541 | 56.003 | 17.464 | 1.00 | 0.00 |
| H      |      |    |     |     |        |        |        |      |      |
| HETATM | 9507 | H8 | PRP | 647 | 28.884 | 57.043 | 18.125 | 1.00 | 0.00 |
| H      |      |    |     |     |        |        |        |      |      |
| HETATM | 9508 | O1 | PRP | 648 | 23.662 | 54.467 | 21.610 | 1.00 | 0.00 |
| O      |      |    |     |     |        |        |        |      |      |
| HETATM | 9509 | H1 | PRP | 648 | 23.435 | 54.964 | 20.821 | 1.00 | 0.00 |
| H      |      |    |     |     |        |        |        |      |      |
| HETATM | 9510 | C1 | PRP | 648 | 24.248 | 53.179 | 21.248 | 1.00 | 0.00 |
| C      |      |    |     |     |        |        |        |      |      |
| HETATM | 9511 | H2 | PRP | 648 | 24.411 | 53.169 | 20.170 | 1.00 | 0.00 |
| H      |      |    |     |     |        |        |        |      |      |
| HETATM | 9512 | H3 | PRP | 648 | 25.243 | 53.161 | 21.693 | 1.00 | 0.00 |
| H      |      |    |     |     |        |        |        |      |      |
| HETATM | 9513 | C2 | PRP | 648 | 23.510 | 51.970 | 21.785 | 1.00 | 0.00 |
| C      |      |    |     |     |        |        |        |      |      |
| HETATM | 9514 | H4 | PRP | 648 | 24.309 | 51.245 | 21.942 | 1.00 | 0.00 |
| H      |      |    |     |     |        |        |        |      |      |
| HETATM | 9515 | O2 | PRP | 648 | 22.585 | 51.459 | 20.915 | 1.00 | 0.00 |
| O      |      |    |     |     |        |        |        |      |      |
| HETATM | 9516 | H5 | PRP | 648 | 21.699 | 51.619 | 21.249 | 1.00 | 0.00 |
| H      |      |    |     |     |        |        |        |      |      |
| HETATM | 9517 | C3 | PRP | 648 | 23.005 | 52.303 | 23.181 | 1.00 | 0.00 |
| C      |      |    |     |     |        |        |        |      |      |
| HETATM | 9518 | H6 | PRP | 648 | 22.825 | 51.326 | 23.629 | 1.00 | 0.00 |
| H      |      |    |     |     |        |        |        |      |      |
| HETATM | 9519 | H7 | PRP | 648 | 23.808 | 52.833 | 23.695 | 1.00 | 0.00 |
| H      |      |    |     |     |        |        |        |      |      |

|        |      |    |     |     |        |        |        |      |      |
|--------|------|----|-----|-----|--------|--------|--------|------|------|
| HETATM | 9520 | H8 | PRP | 648 | 22.048 | 52.823 | 23.158 | 1.00 | 0.00 |
| H      |      |    |     |     |        |        |        |      |      |
| HETATM | 9521 | O1 | PRP | 649 | 28.587 | 57.011 | 11.866 | 1.00 | 0.00 |
| O      |      |    |     |     |        |        |        |      |      |
| HETATM | 9522 | H1 | PRP | 649 | 29.157 | 56.240 | 11.908 | 1.00 | 0.00 |
| H      |      |    |     |     |        |        |        |      |      |
| HETATM | 9523 | C1 | PRP | 649 | 27.337 | 56.597 | 12.373 | 1.00 | 0.00 |
| C      |      |    |     |     |        |        |        |      |      |
| HETATM | 9524 | H2 | PRP | 649 | 26.609 | 57.350 | 12.070 | 1.00 | 0.00 |
| H      |      |    |     |     |        |        |        |      |      |
| HETATM | 9525 | H3 | PRP | 649 | 26.957 | 55.732 | 11.830 | 1.00 | 0.00 |
| H      |      |    |     |     |        |        |        |      |      |
| HETATM | 9526 | C2 | PRP | 649 | 27.320 | 56.448 | 13.929 | 1.00 | 0.00 |
| C      |      |    |     |     |        |        |        |      |      |
| HETATM | 9527 | H4 | PRP | 649 | 28.052 | 57.180 | 14.271 | 1.00 | 0.00 |
| H      |      |    |     |     |        |        |        |      |      |
| HETATM | 9528 | O2 | PRP | 649 | 27.891 | 55.155 | 14.258 | 1.00 | 0.00 |
| O      |      |    |     |     |        |        |        |      |      |
| HETATM | 9529 | H5 | PRP | 649 | 28.362 | 55.197 | 15.094 | 1.00 | 0.00 |
| H      |      |    |     |     |        |        |        |      |      |
| HETATM | 9530 | C3 | PRP | 649 | 25.964 | 56.473 | 14.523 | 1.00 | 0.00 |
| C      |      |    |     |     |        |        |        |      |      |
| HETATM | 9531 | H6 | PRP | 649 | 26.077 | 56.628 | 15.596 | 1.00 | 0.00 |
| H      |      |    |     |     |        |        |        |      |      |
| HETATM | 9532 | H7 | PRP | 649 | 25.611 | 57.398 | 14.067 | 1.00 | 0.00 |
| H      |      |    |     |     |        |        |        |      |      |
| HETATM | 9533 | H8 | PRP | 649 | 25.468 | 55.517 | 14.354 | 1.00 | 0.00 |
| H      |      |    |     |     |        |        |        |      |      |
| HETATM | 9534 | O1 | PRP | 650 | 22.825 | 53.229 | 18.075 | 1.00 | 0.00 |
| O      |      |    |     |     |        |        |        |      |      |
| HETATM | 9535 | H1 | PRP | 650 | 23.724 | 52.906 | 17.977 | 1.00 | 0.00 |
| H      |      |    |     |     |        |        |        |      |      |
| HETATM | 9536 | C1 | PRP | 650 | 22.541 | 54.246 | 17.223 | 1.00 | 0.00 |
| C      |      |    |     |     |        |        |        |      |      |
| HETATM | 9537 | H2 | PRP | 650 | 22.861 | 53.961 | 16.221 | 1.00 | 0.00 |
| H      |      |    |     |     |        |        |        |      |      |
| HETATM | 9538 | H3 | PRP | 650 | 21.458 | 54.352 | 17.161 | 1.00 | 0.00 |
| H      |      |    |     |     |        |        |        |      |      |
| HETATM | 9539 | C2 | PRP | 650 | 23.271 | 55.511 | 17.670 | 1.00 | 0.00 |
| C      |      |    |     |     |        |        |        |      |      |
| HETATM | 9540 | H4 | PRP | 650 | 24.319 | 55.267 | 17.497 | 1.00 | 0.00 |
| H      |      |    |     |     |        |        |        |      |      |
| HETATM | 9541 | O2 | PRP | 650 | 23.076 | 55.916 | 19.005 | 1.00 | 0.00 |
| O      |      |    |     |     |        |        |        |      |      |
| HETATM | 9542 | H5 | PRP | 650 | 22.147 | 56.057 | 19.203 | 1.00 | 0.00 |
| H      |      |    |     |     |        |        |        |      |      |
| HETATM | 9543 | C3 | PRP | 650 | 22.779 | 56.554 | 16.643 | 1.00 | 0.00 |
| C      |      |    |     |     |        |        |        |      |      |
| HETATM | 9544 | H6 | PRP | 650 | 23.478 | 57.389 | 16.689 | 1.00 | 0.00 |
| H      |      |    |     |     |        |        |        |      |      |
| HETATM | 9545 | H7 | PRP | 650 | 22.797 | 56.191 | 15.616 | 1.00 | 0.00 |
| H      |      |    |     |     |        |        |        |      |      |
| HETATM | 9546 | H8 | PRP | 650 | 21.745 | 56.852 | 16.823 | 1.00 | 0.00 |
| H      |      |    |     |     |        |        |        |      |      |
| HETATM | 9547 | O1 | PRP | 651 | 24.504 | 34.470 | 19.533 | 1.00 | 0.00 |
| O      |      |    |     |     |        |        |        |      |      |



|        |      |    |     |     |        |        |        |      |      |
|--------|------|----|-----|-----|--------|--------|--------|------|------|
| HETATM | 9548 | H1 | PRP | 651 | 23.982 | 34.810 | 20.263 | 1.00 | 0.00 |
| H      |      |    |     |     |        |        |        |      |      |
| HETATM | 9549 | C1 | PRP | 651 | 25.853 | 34.882 | 19.806 | 1.00 | 0.00 |
| C      |      |    |     |     |        |        |        |      |      |
| HETATM | 9550 | H2 | PRP | 651 | 26.398 | 35.001 | 18.870 | 1.00 | 0.00 |
| H      |      |    |     |     |        |        |        |      |      |
| HETATM | 9551 | H3 | PRP | 651 | 25.833 | 35.836 | 20.333 | 1.00 | 0.00 |
| H      |      |    |     |     |        |        |        |      |      |
| HETATM | 9552 | C2 | PRP | 651 | 26.433 | 33.785 | 20.746 | 1.00 | 0.00 |
| C      |      |    |     |     |        |        |        |      |      |
| HETATM | 9553 | H4 | PRP | 651 | 26.123 | 32.820 | 20.344 | 1.00 | 0.00 |
| H      |      |    |     |     |        |        |        |      |      |
| HETATM | 9554 | O2 | PRP | 651 | 25.858 | 33.948 | 22.002 | 1.00 | 0.00 |
| O      |      |    |     |     |        |        |        |      |      |
| HETATM | 9555 | H5 | PRP | 651 | 26.236 | 33.292 | 22.593 | 1.00 | 0.00 |
| H      |      |    |     |     |        |        |        |      |      |
| HETATM | 9556 | C3 | PRP | 651 | 27.928 | 34.015 | 20.763 | 1.00 | 0.00 |
| C      |      |    |     |     |        |        |        |      |      |
| HETATM | 9557 | H6 | PRP | 651 | 28.357 | 33.955 | 19.762 | 1.00 | 0.00 |
| H      |      |    |     |     |        |        |        |      |      |
| HETATM | 9558 | H7 | PRP | 651 | 28.091 | 34.918 | 21.351 | 1.00 | 0.00 |
| H      |      |    |     |     |        |        |        |      |      |
| HETATM | 9559 | H8 | PRP | 651 | 28.368 | 33.193 | 21.328 | 1.00 | 0.00 |
| H      |      |    |     |     |        |        |        |      |      |
| HETATM | 9560 | O1 | PRP | 652 | 25.350 | 49.077 | 23.078 | 1.00 | 0.00 |
| O      |      |    |     |     |        |        |        |      |      |
| HETATM | 9561 | H1 | PRP | 652 | 24.948 | 49.701 | 23.687 | 1.00 | 0.00 |
| H      |      |    |     |     |        |        |        |      |      |
| HETATM | 9562 | C1 | PRP | 652 | 24.709 | 47.838 | 23.357 | 1.00 | 0.00 |
| C      |      |    |     |     |        |        |        |      |      |
| HETATM | 9563 | H2 | PRP | 652 | 24.510 | 47.791 | 24.427 | 1.00 | 0.00 |
| H      |      |    |     |     |        |        |        |      |      |
| HETATM | 9564 | H3 | PRP | 652 | 23.778 | 47.841 | 22.789 | 1.00 | 0.00 |
| H      |      |    |     |     |        |        |        |      |      |
| HETATM | 9565 | C2 | PRP | 652 | 25.637 | 46.678 | 23.057 | 1.00 | 0.00 |
| C      |      |    |     |     |        |        |        |      |      |
| HETATM | 9566 | H4 | PRP | 652 | 26.517 | 46.909 | 23.658 | 1.00 | 0.00 |
| H      |      |    |     |     |        |        |        |      |      |
| HETATM | 9567 | O2 | PRP | 652 | 25.889 | 46.816 | 21.678 | 1.00 | 0.00 |
| O      |      |    |     |     |        |        |        |      |      |
| HETATM | 9568 | H5 | PRP | 652 | 26.267 | 47.678 | 21.489 | 1.00 | 0.00 |
| H      |      |    |     |     |        |        |        |      |      |
| HETATM | 9569 | C3 | PRP | 652 | 25.137 | 45.255 | 23.343 | 1.00 | 0.00 |
| C      |      |    |     |     |        |        |        |      |      |
| HETATM | 9570 | H6 | PRP | 652 | 26.003 | 44.595 | 23.375 | 1.00 | 0.00 |
| H      |      |    |     |     |        |        |        |      |      |
| HETATM | 9571 | H7 | PRP | 652 | 24.707 | 45.209 | 24.344 | 1.00 | 0.00 |
| H      |      |    |     |     |        |        |        |      |      |
| HETATM | 9572 | H8 | PRP | 652 | 24.423 | 44.937 | 22.583 | 1.00 | 0.00 |
| H      |      |    |     |     |        |        |        |      |      |
| HETATM | 9573 | O1 | PRP | 653 | 34.566 | 46.519 | 14.607 | 1.00 | 0.00 |
| O      |      |    |     |     |        |        |        |      |      |
| HETATM | 9574 | H1 | PRP | 653 | 35.512 | 46.441 | 14.467 | 1.00 | 0.00 |
| H      |      |    |     |     |        |        |        |      |      |
| HETATM | 9575 | C1 | PRP | 653 | 33.835 | 45.640 | 13.679 | 1.00 | 0.00 |
| C      |      |    |     |     |        |        |        |      |      |

|        |      |    |     |     |        |        |        |      |      |
|--------|------|----|-----|-----|--------|--------|--------|------|------|
| HETATM | 9576 | H2 | PRP | 653 | 32.800 | 45.977 | 13.623 | 1.00 | 0.00 |
| H      |      |    |     |     |        |        |        |      |      |
| HETATM | 9577 | H3 | PRP | 653 | 34.264 | 45.588 | 12.678 | 1.00 | 0.00 |
| H      |      |    |     |     |        |        |        |      |      |
| HETATM | 9578 | C2 | PRP | 653 | 33.838 | 44.214 | 14.333 | 1.00 | 0.00 |
| C      |      |    |     |     |        |        |        |      |      |
| HETATM | 9579 | H4 | PRP | 653 | 33.472 | 44.258 | 15.359 | 1.00 | 0.00 |
| H      |      |    |     |     |        |        |        |      |      |
| HETATM | 9580 | O2 | PRP | 653 | 35.228 | 43.753 | 14.369 | 1.00 | 0.00 |
| O      |      |    |     |     |        |        |        |      |      |
| HETATM | 9581 | H5 | PRP | 653 | 35.786 | 44.463 | 14.695 | 1.00 | 0.00 |
| H      |      |    |     |     |        |        |        |      |      |
| HETATM | 9582 | C3 | PRP | 653 | 32.990 | 43.260 | 13.586 | 1.00 | 0.00 |
| C      |      |    |     |     |        |        |        |      |      |
| HETATM | 9583 | H6 | PRP | 653 | 31.927 | 43.497 | 13.637 | 1.00 | 0.00 |
| H      |      |    |     |     |        |        |        |      |      |
| HETATM | 9584 | H7 | PRP | 653 | 33.255 | 43.341 | 12.532 | 1.00 | 0.00 |
| H      |      |    |     |     |        |        |        |      |      |
| HETATM | 9585 | H8 | PRP | 653 | 33.076 | 42.245 | 13.974 | 1.00 | 0.00 |
| H      |      |    |     |     |        |        |        |      |      |
| HETATM | 9586 | O1 | PRP | 654 | 40.167 | 53.518 | 25.002 | 1.00 | 0.00 |
| O      |      |    |     |     |        |        |        |      |      |
| HETATM | 9587 | H1 | PRP | 654 | 40.846 | 53.465 | 25.678 | 1.00 | 0.00 |
| H      |      |    |     |     |        |        |        |      |      |
| HETATM | 9588 | C1 | PRP | 654 | 40.032 | 54.839 | 24.635 | 1.00 | 0.00 |
| C      |      |    |     |     |        |        |        |      |      |
| HETATM | 9589 | H2 | PRP | 654 | 39.082 | 54.803 | 24.102 | 1.00 | 0.00 |
| H      |      |    |     |     |        |        |        |      |      |
| HETATM | 9590 | H3 | PRP | 654 | 39.921 | 55.474 | 25.513 | 1.00 | 0.00 |
| H      |      |    |     |     |        |        |        |      |      |
| HETATM | 9591 | C2 | PRP | 654 | 41.219 | 55.233 | 23.752 | 1.00 | 0.00 |
| C      |      |    |     |     |        |        |        |      |      |
| HETATM | 9592 | H4 | PRP | 654 | 41.371 | 54.438 | 23.022 | 1.00 | 0.00 |
| H      |      |    |     |     |        |        |        |      |      |
| HETATM | 9593 | O2 | PRP | 654 | 42.468 | 55.346 | 24.455 | 1.00 | 0.00 |
| O      |      |    |     |     |        |        |        |      |      |
| HETATM | 9594 | H5 | PRP | 654 | 42.461 | 55.881 | 25.252 | 1.00 | 0.00 |
| H      |      |    |     |     |        |        |        |      |      |
| HETATM | 9595 | C3 | PRP | 654 | 41.041 | 56.510 | 22.971 | 1.00 | 0.00 |
| C      |      |    |     |     |        |        |        |      |      |
| HETATM | 9596 | H6 | PRP | 654 | 39.971 | 56.630 | 22.802 | 1.00 | 0.00 |
| H      |      |    |     |     |        |        |        |      |      |
| HETATM | 9597 | H7 | PRP | 654 | 41.480 | 57.325 | 23.547 | 1.00 | 0.00 |
| H      |      |    |     |     |        |        |        |      |      |
| HETATM | 9598 | H8 | PRP | 654 | 41.622 | 56.429 | 22.052 | 1.00 | 0.00 |
| H      |      |    |     |     |        |        |        |      |      |
| HETATM | 9599 | O1 | PRP | 655 | 25.334 | 52.587 | 17.365 | 1.00 | 0.00 |
| O      |      |    |     |     |        |        |        |      |      |
| HETATM | 9600 | H1 | PRP | 655 | 25.457 | 51.643 | 17.485 | 1.00 | 0.00 |
| H      |      |    |     |     |        |        |        |      |      |
| HETATM | 9601 | C1 | PRP | 655 | 25.668 | 52.903 | 15.978 | 1.00 | 0.00 |
| C      |      |    |     |     |        |        |        |      |      |
| HETATM | 9602 | H2 | PRP | 655 | 24.834 | 52.545 | 15.376 | 1.00 | 0.00 |
| H      |      |    |     |     |        |        |        |      |      |
| HETATM | 9603 | H3 | PRP | 655 | 25.823 | 53.977 | 15.877 | 1.00 | 0.00 |
| H      |      |    |     |     |        |        |        |      |      |

|        |      |    |     |     |        |        |        |      |      |
|--------|------|----|-----|-----|--------|--------|--------|------|------|
| HETATM | 9604 | C2 | PRP | 655 | 26.938 | 52.127 | 15.570 | 1.00 | 0.00 |
| C      |      |    |     |     |        |        |        |      |      |
| HETATM | 9605 | H4 | PRP | 655 | 27.011 | 52.281 | 14.493 | 1.00 | 0.00 |
| H      |      |    |     |     |        |        |        |      |      |
| HETATM | 9606 | O2 | PRP | 655 | 26.676 | 50.764 | 15.895 | 1.00 | 0.00 |
| O      |      |    |     |     |        |        |        |      |      |
| HETATM | 9607 | H5 | PRP | 655 | 26.901 | 50.102 | 15.238 | 1.00 | 0.00 |
| H      |      |    |     |     |        |        |        |      |      |
| HETATM | 9608 | C3 | PRP | 655 | 28.091 | 52.589 | 16.323 | 1.00 | 0.00 |
| C      |      |    |     |     |        |        |        |      |      |
| HETATM | 9609 | H6 | PRP | 655 | 28.022 | 52.311 | 17.375 | 1.00 | 0.00 |
| H      |      |    |     |     |        |        |        |      |      |
| HETATM | 9610 | H7 | PRP | 655 | 28.964 | 52.085 | 15.910 | 1.00 | 0.00 |
| H      |      |    |     |     |        |        |        |      |      |
| HETATM | 9611 | H8 | PRP | 655 | 28.132 | 53.678 | 16.306 | 1.00 | 0.00 |
| H      |      |    |     |     |        |        |        |      |      |
| HETATM | 9612 | O1 | PRP | 656 | 51.564 | 43.587 | 11.148 | 1.00 | 0.00 |
| O      |      |    |     |     |        |        |        |      |      |
| HETATM | 9613 | H1 | PRP | 656 | 51.863 | 43.004 | 11.850 | 1.00 | 0.00 |
| H      |      |    |     |     |        |        |        |      |      |
| HETATM | 9614 | C1 | PRP | 656 | 51.133 | 44.772 | 11.699 | 1.00 | 0.00 |
| C      |      |    |     |     |        |        |        |      |      |
| HETATM | 9615 | H2 | PRP | 656 | 52.006 | 45.247 | 12.145 | 1.00 | 0.00 |
| H      |      |    |     |     |        |        |        |      |      |
| HETATM | 9616 | H3 | PRP | 656 | 50.651 | 45.334 | 10.899 | 1.00 | 0.00 |
| H      |      |    |     |     |        |        |        |      |      |
| HETATM | 9617 | C2 | PRP | 656 | 50.052 | 44.633 | 12.825 | 1.00 | 0.00 |
| C      |      |    |     |     |        |        |        |      |      |
| HETATM | 9618 | H4 | PRP | 656 | 49.915 | 45.634 | 13.234 | 1.00 | 0.00 |
| H      |      |    |     |     |        |        |        |      |      |
| HETATM | 9619 | O2 | PRP | 656 | 50.321 | 43.739 | 13.847 | 1.00 | 0.00 |
| O      |      |    |     |     |        |        |        |      |      |
| HETATM | 9620 | H5 | PRP | 656 | 51.052 | 44.127 | 14.335 | 1.00 | 0.00 |
| H      |      |    |     |     |        |        |        |      |      |
| HETATM | 9621 | C3 | PRP | 656 | 48.738 | 44.314 | 12.109 | 1.00 | 0.00 |
| C      |      |    |     |     |        |        |        |      |      |
| HETATM | 9622 | H6 | PRP | 656 | 48.810 | 43.800 | 11.151 | 1.00 | 0.00 |
| H      |      |    |     |     |        |        |        |      |      |
| HETATM | 9623 | H7 | PRP | 656 | 48.131 | 43.724 | 12.796 | 1.00 | 0.00 |
| H      |      |    |     |     |        |        |        |      |      |
| HETATM | 9624 | H8 | PRP | 656 | 48.285 | 45.263 | 11.823 | 1.00 | 0.00 |
| H      |      |    |     |     |        |        |        |      |      |
| HETATM | 9625 | O1 | PRP | 657 | 35.787 | 40.970 | 28.792 | 1.00 | 0.00 |
| O      |      |    |     |     |        |        |        |      |      |
| HETATM | 9626 | H1 | PRP | 657 | 36.449 | 40.938 | 28.098 | 1.00 | 0.00 |
| H      |      |    |     |     |        |        |        |      |      |
| HETATM | 9627 | C1 | PRP | 657 | 34.639 | 41.301 | 27.965 | 1.00 | 0.00 |
| C      |      |    |     |     |        |        |        |      |      |
| HETATM | 9628 | H2 | PRP | 657 | 34.027 | 40.407 | 27.844 | 1.00 | 0.00 |
| H      |      |    |     |     |        |        |        |      |      |
| HETATM | 9629 | H3 | PRP | 657 | 34.038 | 41.959 | 28.591 | 1.00 | 0.00 |
| H      |      |    |     |     |        |        |        |      |      |
| HETATM | 9630 | C2 | PRP | 657 | 35.076 | 42.058 | 26.649 | 1.00 | 0.00 |
| C      |      |    |     |     |        |        |        |      |      |
| HETATM | 9631 | H4 | PRP | 657 | 34.265 | 42.175 | 25.931 | 1.00 | 0.00 |
| H      |      |    |     |     |        |        |        |      |      |

|        |      |    |     |     |        |        |        |      |      |
|--------|------|----|-----|-----|--------|--------|--------|------|------|
| HETATM | 9632 | O2 | PRP | 657 | 36.055 | 41.161 | 26.040 | 1.00 | 0.00 |
| O      |      |    |     |     |        |        |        |      |      |
| HETATM | 9633 | H5 | PRP | 657 | 35.973 | 41.304 | 25.095 | 1.00 | 0.00 |
| H      |      |    |     |     |        |        |        |      |      |
| HETATM | 9634 | C3 | PRP | 657 | 35.787 | 43.370 | 27.043 | 1.00 | 0.00 |
| C      |      |    |     |     |        |        |        |      |      |
| HETATM | 9635 | H6 | PRP | 657 | 36.835 | 43.272 | 27.328 | 1.00 | 0.00 |
| H      |      |    |     |     |        |        |        |      |      |
| HETATM | 9636 | H7 | PRP | 657 | 35.875 | 43.876 | 26.082 | 1.00 | 0.00 |
| H      |      |    |     |     |        |        |        |      |      |
| HETATM | 9637 | H8 | PRP | 657 | 35.189 | 43.872 | 27.804 | 1.00 | 0.00 |
| H      |      |    |     |     |        |        |        |      |      |
| HETATM | 9638 | O1 | PRP | 658 | 45.160 | 52.849 | 24.795 | 1.00 | 0.00 |
| O      |      |    |     |     |        |        |        |      |      |
| HETATM | 9639 | H1 | PRP | 658 | 46.098 | 52.958 | 24.623 | 1.00 | 0.00 |
| H      |      |    |     |     |        |        |        |      |      |
| HETATM | 9640 | C1 | PRP | 658 | 44.966 | 52.140 | 26.038 | 1.00 | 0.00 |
| C      |      |    |     |     |        |        |        |      |      |
| HETATM | 9641 | H2 | PRP | 658 | 45.484 | 51.192 | 25.899 | 1.00 | 0.00 |
| H      |      |    |     |     |        |        |        |      |      |
| HETATM | 9642 | H3 | PRP | 658 | 45.457 | 52.654 | 26.864 | 1.00 | 0.00 |
| H      |      |    |     |     |        |        |        |      |      |
| HETATM | 9643 | C2 | PRP | 658 | 43.475 | 51.908 | 26.281 | 1.00 | 0.00 |
| C      |      |    |     |     |        |        |        |      |      |
| HETATM | 9644 | H4 | PRP | 658 | 43.134 | 51.419 | 25.368 | 1.00 | 0.00 |
| H      |      |    |     |     |        |        |        |      |      |
| HETATM | 9645 | O2 | PRP | 658 | 42.884 | 53.193 | 26.412 | 1.00 | 0.00 |
| O      |      |    |     |     |        |        |        |      |      |
| HETATM | 9646 | H5 | PRP | 658 | 43.137 | 53.754 | 25.674 | 1.00 | 0.00 |
| H      |      |    |     |     |        |        |        |      |      |
| HETATM | 9647 | C3 | PRP | 658 | 43.081 | 50.967 | 27.378 | 1.00 | 0.00 |
| C      |      |    |     |     |        |        |        |      |      |
| HETATM | 9648 | H6 | PRP | 658 | 42.158 | 50.485 | 27.055 | 1.00 | 0.00 |
| H      |      |    |     |     |        |        |        |      |      |
| HETATM | 9649 | H7 | PRP | 658 | 43.781 | 50.132 | 27.384 | 1.00 | 0.00 |
| H      |      |    |     |     |        |        |        |      |      |
| HETATM | 9650 | H8 | PRP | 658 | 43.094 | 51.541 | 28.305 | 1.00 | 0.00 |
| H      |      |    |     |     |        |        |        |      |      |
| HETATM | 9651 | O1 | PRP | 659 | 36.188 | 47.061 | 18.730 | 1.00 | 0.00 |
| O      |      |    |     |     |        |        |        |      |      |
| HETATM | 9652 | H1 | PRP | 659 | 36.126 | 48.006 | 18.891 | 1.00 | 0.00 |
| H      |      |    |     |     |        |        |        |      |      |
| HETATM | 9653 | C1 | PRP | 659 | 35.290 | 46.409 | 19.601 | 1.00 | 0.00 |
| C      |      |    |     |     |        |        |        |      |      |
| HETATM | 9654 | H2 | PRP | 659 | 35.762 | 46.007 | 20.498 | 1.00 | 0.00 |
| H      |      |    |     |     |        |        |        |      |      |
| HETATM | 9655 | H3 | PRP | 659 | 34.531 | 47.109 | 19.951 | 1.00 | 0.00 |
| H      |      |    |     |     |        |        |        |      |      |
| HETATM | 9656 | C2 | PRP | 659 | 34.679 | 45.221 | 18.932 | 1.00 | 0.00 |
| C      |      |    |     |     |        |        |        |      |      |
| HETATM | 9657 | H4 | PRP | 659 | 35.444 | 44.530 | 18.577 | 1.00 | 0.00 |
| H      |      |    |     |     |        |        |        |      |      |
| HETATM | 9658 | O2 | PRP | 659 | 34.045 | 45.693 | 17.751 | 1.00 | 0.00 |
| O      |      |    |     |     |        |        |        |      |      |
| HETATM | 9659 | H5 | PRP | 659 | 34.686 | 46.120 | 17.178 | 1.00 | 0.00 |
| H      |      |    |     |     |        |        |        |      |      |

|        |      |    |     |     |        |        |        |      |      |
|--------|------|----|-----|-----|--------|--------|--------|------|------|
| HETATM | 9660 | C3 | PRP | 659 | 33.681 | 44.517 | 19.913 | 1.00 | 0.00 |
| C      |      |    |     |     |        |        |        |      |      |
| HETATM | 9661 | H6 | PRP | 659 | 32.865 | 45.235 | 19.986 | 1.00 | 0.00 |
| H      |      |    |     |     |        |        |        |      |      |
| HETATM | 9662 | H7 | PRP | 659 | 33.290 | 43.615 | 19.442 | 1.00 | 0.00 |
| H      |      |    |     |     |        |        |        |      |      |
| HETATM | 9663 | H8 | PRP | 659 | 34.045 | 44.322 | 20.922 | 1.00 | 0.00 |
| H      |      |    |     |     |        |        |        |      |      |
| HETATM | 9664 | O1 | PRP | 660 | 43.302 | 41.609 | -0.423 | 1.00 | 0.00 |
| O      |      |    |     |     |        |        |        |      |      |
| HETATM | 9665 | H1 | PRP | 660 | 43.486 | 40.671 | -0.341 | 1.00 | 0.00 |
| H      |      |    |     |     |        |        |        |      |      |
| HETATM | 9666 | C1 | PRP | 660 | 44.531 | 42.303 | -0.721 | 1.00 | 0.00 |
| C      |      |    |     |     |        |        |        |      |      |
| HETATM | 9667 | H2 | PRP | 660 | 45.329 | 41.942 | -0.072 | 1.00 | 0.00 |
| H      |      |    |     |     |        |        |        |      |      |
| HETATM | 9668 | H3 | PRP | 660 | 44.958 | 41.951 | -1.660 | 1.00 | 0.00 |
| H      |      |    |     |     |        |        |        |      |      |
| HETATM | 9669 | C2 | PRP | 660 | 44.356 | 43.830 | -0.652 | 1.00 | 0.00 |
| C      |      |    |     |     |        |        |        |      |      |
| HETATM | 9670 | H4 | PRP | 660 | 44.071 | 44.129 | 0.357  | 1.00 | 0.00 |
| H      |      |    |     |     |        |        |        |      |      |
| HETATM | 9671 | O2 | PRP | 660 | 43.394 | 44.165 | -1.594 | 1.00 | 0.00 |
| O      |      |    |     |     |        |        |        |      |      |
| HETATM | 9672 | H5 | PRP | 660 | 42.622 | 43.637 | -1.374 | 1.00 | 0.00 |
| H      |      |    |     |     |        |        |        |      |      |
| HETATM | 9673 | C3 | PRP | 660 | 45.532 | 44.605 | -1.000 | 1.00 | 0.00 |
| C      |      |    |     |     |        |        |        |      |      |
| HETATM | 9674 | H6 | PRP | 660 | 45.338 | 45.677 | -0.978 | 1.00 | 0.00 |
| H      |      |    |     |     |        |        |        |      |      |
| HETATM | 9675 | H7 | PRP | 660 | 46.411 | 44.438 | -0.378 | 1.00 | 0.00 |
| H      |      |    |     |     |        |        |        |      |      |
| HETATM | 9676 | H8 | PRP | 660 | 45.883 | 44.262 | -1.974 | 1.00 | 0.00 |
| H      |      |    |     |     |        |        |        |      |      |
| HETATM | 9677 | O1 | PRP | 661 | 47.242 | 44.054 | 22.308 | 1.00 | 0.00 |
| O      |      |    |     |     |        |        |        |      |      |
| HETATM | 9678 | H1 | PRP | 661 | 47.734 | 43.413 | 22.827 | 1.00 | 0.00 |
| H      |      |    |     |     |        |        |        |      |      |
| HETATM | 9679 | C1 | PRP | 661 | 47.710 | 44.083 | 21.001 | 1.00 | 0.00 |
| C      |      |    |     |     |        |        |        |      |      |
| HETATM | 9680 | H2 | PRP | 661 | 46.992 | 43.518 | 20.408 | 1.00 | 0.00 |
| H      |      |    |     |     |        |        |        |      |      |
| HETATM | 9681 | H3 | PRP | 661 | 47.625 | 45.146 | 20.774 | 1.00 | 0.00 |
| H      |      |    |     |     |        |        |        |      |      |
| HETATM | 9682 | C2 | PRP | 661 | 49.240 | 43.615 | 20.825 | 1.00 | 0.00 |
| C      |      |    |     |     |        |        |        |      |      |
| HETATM | 9683 | H4 | PRP | 661 | 49.357 | 43.480 | 19.750 | 1.00 | 0.00 |
| H      |      |    |     |     |        |        |        |      |      |
| HETATM | 9684 | O2 | PRP | 661 | 49.402 | 42.359 | 21.557 | 1.00 | 0.00 |
| O      |      |    |     |     |        |        |        |      |      |
| HETATM | 9685 | H5 | PRP | 661 | 48.628 | 41.874 | 21.261 | 1.00 | 0.00 |
| H      |      |    |     |     |        |        |        |      |      |
| HETATM | 9686 | C3 | PRP | 661 | 50.130 | 44.702 | 21.349 | 1.00 | 0.00 |
| C      |      |    |     |     |        |        |        |      |      |
| HETATM | 9687 | H6 | PRP | 661 | 50.175 | 45.453 | 20.559 | 1.00 | 0.00 |
| H      |      |    |     |     |        |        |        |      |      |

|        |      |    |     |     |        |        |        |      |      |
|--------|------|----|-----|-----|--------|--------|--------|------|------|
| HETATM | 9688 | H7 | PRP | 661 | 49.704 | 45.236 | 22.198 | 1.00 | 0.00 |
| H      |      |    |     |     |        |        |        |      |      |
| HETATM | 9689 | H8 | PRP | 661 | 51.091 | 44.227 | 21.545 | 1.00 | 0.00 |
| H      |      |    |     |     |        |        |        |      |      |
| HETATM | 9690 | O1 | PRP | 662 | 38.643 | 43.453 | 18.295 | 1.00 | 0.00 |
| O      |      |    |     |     |        |        |        |      |      |
| HETATM | 9691 | H1 | PRP | 662 | 38.456 | 43.484 | 17.354 | 1.00 | 0.00 |
| H      |      |    |     |     |        |        |        |      |      |
| HETATM | 9692 | C1 | PRP | 662 | 39.286 | 44.670 | 18.557 | 1.00 | 0.00 |
| C      |      |    |     |     |        |        |        |      |      |
| HETATM | 9693 | H2 | PRP | 662 | 38.615 | 45.119 | 19.289 | 1.00 | 0.00 |
| H      |      |    |     |     |        |        |        |      |      |
| HETATM | 9694 | H3 | PRP | 662 | 40.239 | 44.457 | 19.042 | 1.00 | 0.00 |
| H      |      |    |     |     |        |        |        |      |      |
| HETATM | 9695 | C2 | PRP | 662 | 39.588 | 45.516 | 17.350 | 1.00 | 0.00 |
| C      |      |    |     |     |        |        |        |      |      |
| HETATM | 9696 | H4 | PRP | 662 | 40.096 | 46.457 | 17.564 | 1.00 | 0.00 |
| H      |      |    |     |     |        |        |        |      |      |
| HETATM | 9697 | O2 | PRP | 662 | 38.349 | 45.824 | 16.814 | 1.00 | 0.00 |
| O      |      |    |     |     |        |        |        |      |      |
| HETATM | 9698 | H5 | PRP | 662 | 37.726 | 46.125 | 17.479 | 1.00 | 0.00 |
| H      |      |    |     |     |        |        |        |      |      |
| HETATM | 9699 | C3 | PRP | 662 | 40.406 | 44.692 | 16.264 | 1.00 | 0.00 |
| C      |      |    |     |     |        |        |        |      |      |
| HETATM | 9700 | H6 | PRP | 662 | 40.448 | 45.116 | 15.260 | 1.00 | 0.00 |
| H      |      |    |     |     |        |        |        |      |      |
| HETATM | 9701 | H7 | PRP | 662 | 41.412 | 44.623 | 16.676 | 1.00 | 0.00 |
| H      |      |    |     |     |        |        |        |      |      |
| HETATM | 9702 | H8 | PRP | 662 | 39.921 | 43.727 | 16.118 | 1.00 | 0.00 |
| H      |      |    |     |     |        |        |        |      |      |
| HETATM | 9703 | O1 | PRP | 663 | 16.144 | 55.209 | 17.026 | 1.00 | 0.00 |
| O      |      |    |     |     |        |        |        |      |      |
| HETATM | 9704 | H1 | PRP | 663 | 16.925 | 55.467 | 17.521 | 1.00 | 0.00 |
| H      |      |    |     |     |        |        |        |      |      |
| HETATM | 9705 | C1 | PRP | 663 | 16.314 | 53.872 | 16.845 | 1.00 | 0.00 |
| C      |      |    |     |     |        |        |        |      |      |
| HETATM | 9706 | H2 | PRP | 663 | 15.788 | 53.407 | 17.678 | 1.00 | 0.00 |
| H      |      |    |     |     |        |        |        |      |      |
| HETATM | 9707 | H3 | PRP | 663 | 15.620 | 53.533 | 16.075 | 1.00 | 0.00 |
| H      |      |    |     |     |        |        |        |      |      |
| HETATM | 9708 | C2 | PRP | 663 | 17.780 | 53.431 | 16.741 | 1.00 | 0.00 |
| C      |      |    |     |     |        |        |        |      |      |
| HETATM | 9709 | H4 | PRP | 663 | 17.832 | 52.494 | 16.187 | 1.00 | 0.00 |
| H      |      |    |     |     |        |        |        |      |      |
| HETATM | 9710 | O2 | PRP | 663 | 18.418 | 53.300 | 18.005 | 1.00 | 0.00 |
| O      |      |    |     |     |        |        |        |      |      |
| HETATM | 9711 | H5 | PRP | 663 | 19.066 | 52.594 | 18.066 | 1.00 | 0.00 |
| H      |      |    |     |     |        |        |        |      |      |
| HETATM | 9712 | C3 | PRP | 663 | 18.660 | 54.275 | 15.845 | 1.00 | 0.00 |
| C      |      |    |     |     |        |        |        |      |      |
| HETATM | 9713 | H6 | PRP | 663 | 19.524 | 53.647 | 15.627 | 1.00 | 0.00 |
| H      |      |    |     |     |        |        |        |      |      |
| HETATM | 9714 | H7 | PRP | 663 | 18.172 | 54.680 | 14.958 | 1.00 | 0.00 |
| H      |      |    |     |     |        |        |        |      |      |
| HETATM | 9715 | H8 | PRP | 663 | 19.016 | 55.121 | 16.433 | 1.00 | 0.00 |
| H      |      |    |     |     |        |        |        |      |      |

|        |      |    |     |     |        |        |        |      |      |
|--------|------|----|-----|-----|--------|--------|--------|------|------|
| HETATM | 9716 | O1 | PRP | 664 | 21.923 | 57.593 | 9.066  | 1.00 | 0.00 |
| O      |      |    |     |     |        |        |        |      |      |
| HETATM | 9717 | H1 | PRP | 664 | 21.984 | 57.179 | 9.930  | 1.00 | 0.00 |
| H      |      |    |     |     |        |        |        |      |      |
| HETATM | 9718 | C1 | PRP | 664 | 23.125 | 58.077 | 8.807  | 1.00 | 0.00 |
| C      |      |    |     |     |        |        |        |      |      |
| HETATM | 9719 | H2 | PRP | 664 | 23.485 | 57.838 | 7.806  | 1.00 | 0.00 |
| H      |      |    |     |     |        |        |        |      |      |
| HETATM | 9720 | H3 | PRP | 664 | 23.293 | 59.149 | 8.911  | 1.00 | 0.00 |
| H      |      |    |     |     |        |        |        |      |      |
| HETATM | 9721 | C2 | PRP | 664 | 24.089 | 57.408 | 9.852  | 1.00 | 0.00 |
| C      |      |    |     |     |        |        |        |      |      |
| HETATM | 9722 | H4 | PRP | 664 | 25.036 | 57.509 | 9.321  | 1.00 | 0.00 |
| H      |      |    |     |     |        |        |        |      |      |
| HETATM | 9723 | O2 | PRP | 664 | 23.898 | 56.003 | 10.097 | 1.00 | 0.00 |
| O      |      |    |     |     |        |        |        |      |      |
| HETATM | 9724 | H5 | PRP | 664 | 23.901 | 55.504 | 9.277  | 1.00 | 0.00 |
| H      |      |    |     |     |        |        |        |      |      |
| HETATM | 9725 | C3 | PRP | 664 | 24.090 | 58.239 | 11.163 | 1.00 | 0.00 |
| C      |      |    |     |     |        |        |        |      |      |
| HETATM | 9726 | H6 | PRP | 664 | 23.054 | 58.542 | 11.316 | 1.00 | 0.00 |
| H      |      |    |     |     |        |        |        |      |      |
| HETATM | 9727 | H7 | PRP | 664 | 24.434 | 57.729 | 12.062 | 1.00 | 0.00 |
| H      |      |    |     |     |        |        |        |      |      |
| HETATM | 9728 | H8 | PRP | 664 | 24.576 | 59.213 | 11.096 | 1.00 | 0.00 |
| H      |      |    |     |     |        |        |        |      |      |
| HETATM | 9729 | O1 | PRP | 665 | 24.065 | 42.719 | 16.558 | 1.00 | 0.00 |
| O      |      |    |     |     |        |        |        |      |      |
| HETATM | 9730 | H1 | PRP | 665 | 24.449 | 43.028 | 17.382 | 1.00 | 0.00 |
| H      |      |    |     |     |        |        |        |      |      |
| HETATM | 9731 | C1 | PRP | 665 | 22.738 | 42.434 | 16.825 | 1.00 | 0.00 |
| C      |      |    |     |     |        |        |        |      |      |
| HETATM | 9732 | H2 | PRP | 665 | 22.385 | 41.768 | 16.038 | 1.00 | 0.00 |
| H      |      |    |     |     |        |        |        |      |      |
| HETATM | 9733 | H3 | PRP | 665 | 22.541 | 42.006 | 17.808 | 1.00 | 0.00 |
| H      |      |    |     |     |        |        |        |      |      |
| HETATM | 9734 | C2 | PRP | 665 | 22.039 | 43.788 | 16.644 | 1.00 | 0.00 |
| C      |      |    |     |     |        |        |        |      |      |
| HETATM | 9735 | H4 | PRP | 665 | 22.499 | 44.352 | 15.833 | 1.00 | 0.00 |
| H      |      |    |     |     |        |        |        |      |      |
| HETATM | 9736 | O2 | PRP | 665 | 22.203 | 44.644 | 17.798 | 1.00 | 0.00 |
| O      |      |    |     |     |        |        |        |      |      |
| HETATM | 9737 | H5 | PRP | 665 | 23.051 | 44.459 | 18.210 | 1.00 | 0.00 |
| H      |      |    |     |     |        |        |        |      |      |
| HETATM | 9738 | C3 | PRP | 665 | 20.577 | 43.684 | 16.408 | 1.00 | 0.00 |
| C      |      |    |     |     |        |        |        |      |      |
| HETATM | 9739 | H6 | PRP | 665 | 20.181 | 43.104 | 17.242 | 1.00 | 0.00 |
| H      |      |    |     |     |        |        |        |      |      |
| HETATM | 9740 | H7 | PRP | 665 | 20.100 | 44.652 | 16.560 | 1.00 | 0.00 |
| H      |      |    |     |     |        |        |        |      |      |
| HETATM | 9741 | H8 | PRP | 665 | 20.387 | 43.267 | 15.419 | 1.00 | 0.00 |
| H      |      |    |     |     |        |        |        |      |      |
| HETATM | 9742 | O1 | PRP | 666 | 21.067 | 48.056 | 13.159 | 1.00 | 0.00 |
| O      |      |    |     |     |        |        |        |      |      |
| HETATM | 9743 | H1 | PRP | 666 | 21.950 | 48.077 | 12.781 | 1.00 | 0.00 |
| H      |      |    |     |     |        |        |        |      |      |

|        |      |    |     |     |        |        |        |      |      |
|--------|------|----|-----|-----|--------|--------|--------|------|------|
| HETATM | 9744 | C1 | PRP | 666 | 20.895 | 48.910 | 14.239 | 1.00 | 0.00 |
| C      |      |    |     |     |        |        |        |      |      |
| HETATM | 9745 | H2 | PRP | 666 | 19.909 | 48.835 | 14.699 | 1.00 | 0.00 |
| H      |      |    |     |     |        |        |        |      |      |
| HETATM | 9746 | H3 | PRP | 666 | 21.585 | 48.635 | 15.037 | 1.00 | 0.00 |
| H      |      |    |     |     |        |        |        |      |      |
| HETATM | 9747 | C2 | PRP | 666 | 21.201 | 50.389 | 13.927 | 1.00 | 0.00 |
| C      |      |    |     |     |        |        |        |      |      |
| HETATM | 9748 | H4 | PRP | 666 | 20.824 | 50.929 | 14.795 | 1.00 | 0.00 |
| H      |      |    |     |     |        |        |        |      |      |
| HETATM | 9749 | O2 | PRP | 666 | 20.534 | 50.619 | 12.757 | 1.00 | 0.00 |
| O      |      |    |     |     |        |        |        |      |      |
| HETATM | 9750 | H5 | PRP | 666 | 20.344 | 49.848 | 12.219 | 1.00 | 0.00 |
| H      |      |    |     |     |        |        |        |      |      |
| HETATM | 9751 | C3 | PRP | 666 | 22.727 | 50.756 | 13.934 | 1.00 | 0.00 |
| C      |      |    |     |     |        |        |        |      |      |
| HETATM | 9752 | H6 | PRP | 666 | 22.848 | 51.833 | 13.821 | 1.00 | 0.00 |
| H      |      |    |     |     |        |        |        |      |      |
| HETATM | 9753 | H7 | PRP | 666 | 23.093 | 50.441 | 14.911 | 1.00 | 0.00 |
| H      |      |    |     |     |        |        |        |      |      |
| HETATM | 9754 | H8 | PRP | 666 | 23.377 | 50.261 | 13.213 | 1.00 | 0.00 |
| H      |      |    |     |     |        |        |        |      |      |
| HETATM | 9755 | O1 | PRP | 667 | 26.950 | 62.823 | 17.590 | 1.00 | 0.00 |
| O      |      |    |     |     |        |        |        |      |      |
| HETATM | 9756 | H1 | PRP | 667 | 26.805 | 62.806 | 18.539 | 1.00 | 0.00 |
| H      |      |    |     |     |        |        |        |      |      |
| HETATM | 9757 | C1 | PRP | 667 | 27.316 | 61.534 | 17.076 | 1.00 | 0.00 |
| C      |      |    |     |     |        |        |        |      |      |
| HETATM | 9758 | H2 | PRP | 667 | 27.441 | 61.620 | 15.997 | 1.00 | 0.00 |
| H      |      |    |     |     |        |        |        |      |      |
| HETATM | 9759 | H3 | PRP | 667 | 28.232 | 61.201 | 17.565 | 1.00 | 0.00 |
| H      |      |    |     |     |        |        |        |      |      |
| HETATM | 9760 | C2 | PRP | 667 | 26.097 | 60.704 | 17.521 | 1.00 | 0.00 |
| C      |      |    |     |     |        |        |        |      |      |
| HETATM | 9761 | H4 | PRP | 667 | 25.159 | 61.064 | 17.098 | 1.00 | 0.00 |
| H      |      |    |     |     |        |        |        |      |      |
| HETATM | 9762 | O2 | PRP | 667 | 26.105 | 60.735 | 18.974 | 1.00 | 0.00 |
| O      |      |    |     |     |        |        |        |      |      |
| HETATM | 9763 | H5 | PRP | 667 | 26.255 | 59.847 | 19.305 | 1.00 | 0.00 |
| H      |      |    |     |     |        |        |        |      |      |
| HETATM | 9764 | C3 | PRP | 667 | 26.291 | 59.307 | 16.981 | 1.00 | 0.00 |
| C      |      |    |     |     |        |        |        |      |      |
| HETATM | 9765 | H6 | PRP | 667 | 27.250 | 58.893 | 17.291 | 1.00 | 0.00 |
| H      |      |    |     |     |        |        |        |      |      |
| HETATM | 9766 | H7 | PRP | 667 | 25.454 | 58.683 | 17.295 | 1.00 | 0.00 |
| H      |      |    |     |     |        |        |        |      |      |
| HETATM | 9767 | H8 | PRP | 667 | 26.237 | 59.358 | 15.894 | 1.00 | 0.00 |
| H      |      |    |     |     |        |        |        |      |      |
| HETATM | 9768 | O1 | PRP | 668 | 26.222 | 34.658 | 12.696 | 1.00 | 0.00 |
| O      |      |    |     |     |        |        |        |      |      |
| HETATM | 9769 | H1 | PRP | 668 | 25.953 | 35.455 | 13.159 | 1.00 | 0.00 |
| H      |      |    |     |     |        |        |        |      |      |
| HETATM | 9770 | C1 | PRP | 668 | 26.317 | 33.551 | 13.595 | 1.00 | 0.00 |
| C      |      |    |     |     |        |        |        |      |      |
| HETATM | 9771 | H2 | PRP | 668 | 26.624 | 32.659 | 13.050 | 1.00 | 0.00 |
| H      |      |    |     |     |        |        |        |      |      |



|        |      |    |     |     |        |        |        |      |      |
|--------|------|----|-----|-----|--------|--------|--------|------|------|
| HETATM | 9772 | H3 | PRP | 668 | 27.082 | 33.748 | 14.346 | 1.00 | 0.00 |
| H      |      |    |     |     |        |        |        |      |      |
| HETATM | 9773 | C2 | PRP | 668 | 25.086 | 33.137 | 14.368 | 1.00 | 0.00 |
| C      |      |    |     |     |        |        |        |      |      |
| HETATM | 9774 | H4 | PRP | 668 | 25.388 | 32.278 | 14.966 | 1.00 | 0.00 |
| H      |      |    |     |     |        |        |        |      |      |
| HETATM | 9775 | O2 | PRP | 668 | 24.056 | 32.893 | 13.460 | 1.00 | 0.00 |
| O      |      |    |     |     |        |        |        |      |      |
| HETATM | 9776 | H5 | PRP | 668 | 23.217 | 32.810 | 13.919 | 1.00 | 0.00 |
| H      |      |    |     |     |        |        |        |      |      |
| HETATM | 9777 | C3 | PRP | 668 | 24.586 | 34.257 | 15.368 | 1.00 | 0.00 |
| C      |      |    |     |     |        |        |        |      |      |
| HETATM | 9778 | H6 | PRP | 668 | 23.797 | 34.814 | 14.863 | 1.00 | 0.00 |
| H      |      |    |     |     |        |        |        |      |      |
| HETATM | 9779 | H7 | PRP | 668 | 24.254 | 33.878 | 16.335 | 1.00 | 0.00 |
| H      |      |    |     |     |        |        |        |      |      |
| HETATM | 9780 | H8 | PRP | 668 | 25.444 | 34.909 | 15.533 | 1.00 | 0.00 |
| H      |      |    |     |     |        |        |        |      |      |
| HETATM | 9781 | O1 | PRP | 669 | 27.307 | 44.804 | 20.082 | 1.00 | 0.00 |
| O      |      |    |     |     |        |        |        |      |      |
| HETATM | 9782 | H1 | PRP | 669 | 27.145 | 45.486 | 20.738 | 1.00 | 0.00 |
| H      |      |    |     |     |        |        |        |      |      |
| HETATM | 9783 | C1 | PRP | 669 | 26.623 | 43.633 | 20.563 | 1.00 | 0.00 |
| C      |      |    |     |     |        |        |        |      |      |
| HETATM | 9784 | H2 | PRP | 669 | 27.338 | 42.953 | 21.026 | 1.00 | 0.00 |
| H      |      |    |     |     |        |        |        |      |      |
| HETATM | 9785 | H3 | PRP | 669 | 25.875 | 43.929 | 21.298 | 1.00 | 0.00 |
| H      |      |    |     |     |        |        |        |      |      |
| HETATM | 9786 | C2 | PRP | 669 | 25.908 | 42.984 | 19.356 | 1.00 | 0.00 |
| C      |      |    |     |     |        |        |        |      |      |
| HETATM | 9787 | H4 | PRP | 669 | 26.636 | 42.624 | 18.629 | 1.00 | 0.00 |
| H      |      |    |     |     |        |        |        |      |      |
| HETATM | 9788 | O2 | PRP | 669 | 25.041 | 43.977 | 18.805 | 1.00 | 0.00 |
| O      |      |    |     |     |        |        |        |      |      |
| HETATM | 9789 | H5 | PRP | 669 | 25.629 | 44.730 | 18.704 | 1.00 | 0.00 |
| H      |      |    |     |     |        |        |        |      |      |
| HETATM | 9790 | C3 | PRP | 669 | 25.055 | 41.763 | 19.774 | 1.00 | 0.00 |
| C      |      |    |     |     |        |        |        |      |      |
| HETATM | 9791 | H6 | PRP | 669 | 24.831 | 41.149 | 18.902 | 1.00 | 0.00 |
| H      |      |    |     |     |        |        |        |      |      |
| HETATM | 9792 | H7 | PRP | 669 | 25.454 | 41.057 | 20.503 | 1.00 | 0.00 |
| H      |      |    |     |     |        |        |        |      |      |
| HETATM | 9793 | H8 | PRP | 669 | 24.111 | 42.156 | 20.153 | 1.00 | 0.00 |
| H      |      |    |     |     |        |        |        |      |      |
| HETATM | 9794 | O1 | PRP | 670 | 30.176 | 56.227 | 15.298 | 1.00 | 0.00 |
| O      |      |    |     |     |        |        |        |      |      |
| HETATM | 9795 | H1 | PRP | 670 | 30.198 | 56.988 | 14.714 | 1.00 | 0.00 |
| H      |      |    |     |     |        |        |        |      |      |
| HETATM | 9796 | C1 | PRP | 670 | 31.156 | 55.269 | 14.945 | 1.00 | 0.00 |
| C      |      |    |     |     |        |        |        |      |      |
| HETATM | 9797 | H2 | PRP | 670 | 31.778 | 55.078 | 15.820 | 1.00 | 0.00 |
| H      |      |    |     |     |        |        |        |      |      |
| HETATM | 9798 | H3 | PRP | 670 | 30.623 | 54.342 | 14.732 | 1.00 | 0.00 |
| H      |      |    |     |     |        |        |        |      |      |
| HETATM | 9799 | C2 | PRP | 670 | 31.980 | 55.765 | 13.711 | 1.00 | 0.00 |
| C      |      |    |     |     |        |        |        |      |      |

|        |      |    |     |     |        |        |        |      |      |
|--------|------|----|-----|-----|--------|--------|--------|------|------|
| HETATM | 9800 | H4 | PRP | 670 | 32.372 | 56.760 | 13.923 | 1.00 | 0.00 |
| H      |      |    |     |     |        |        |        |      |      |
| HETATM | 9801 | O2 | PRP | 670 | 31.104 | 55.940 | 12.535 | 1.00 | 0.00 |
| O      |      |    |     |     |        |        |        |      |      |
| HETATM | 9802 | H5 | PRP | 670 | 31.420 | 56.685 | 12.020 | 1.00 | 0.00 |
| H      |      |    |     |     |        |        |        |      |      |
| HETATM | 9803 | C3 | PRP | 670 | 33.252 | 54.940 | 13.455 | 1.00 | 0.00 |
| C      |      |    |     |     |        |        |        |      |      |
| HETATM | 9804 | H6 | PRP | 670 | 33.861 | 55.477 | 12.727 | 1.00 | 0.00 |
| H      |      |    |     |     |        |        |        |      |      |
| HETATM | 9805 | H7 | PRP | 670 | 33.781 | 54.765 | 14.392 | 1.00 | 0.00 |
| H      |      |    |     |     |        |        |        |      |      |
| HETATM | 9806 | H8 | PRP | 670 | 33.064 | 54.064 | 12.834 | 1.00 | 0.00 |
| H      |      |    |     |     |        |        |        |      |      |
| HETATM | 9807 | O1 | PRP | 671 | 5.420  | 51.126 | 10.745 | 1.00 | 0.00 |
| O      |      |    |     |     |        |        |        |      |      |
| HETATM | 9808 | H1 | PRP | 671 | 4.849  | 50.536 | 10.247 | 1.00 | 0.00 |
| H      |      |    |     |     |        |        |        |      |      |
| HETATM | 9809 | C1 | PRP | 671 | 6.452  | 50.401 | 11.480 | 1.00 | 0.00 |
| C      |      |    |     |     |        |        |        |      |      |
| HETATM | 9810 | H2 | PRP | 671 | 6.284  | 50.745 | 12.501 | 1.00 | 0.00 |
| H      |      |    |     |     |        |        |        |      |      |
| HETATM | 9811 | H3 | PRP | 671 | 6.273  | 49.326 | 11.480 | 1.00 | 0.00 |
| H      |      |    |     |     |        |        |        |      |      |
| HETATM | 9812 | C2 | PRP | 671 | 7.877  | 50.694 | 10.889 | 1.00 | 0.00 |
| C      |      |    |     |     |        |        |        |      |      |
| HETATM | 9813 | H4 | PRP | 671 | 8.167  | 51.744 | 10.924 | 1.00 | 0.00 |
| H      |      |    |     |     |        |        |        |      |      |
| HETATM | 9814 | O2 | PRP | 671 | 7.764  | 50.214 | 9.519  | 1.00 | 0.00 |
| O      |      |    |     |     |        |        |        |      |      |
| HETATM | 9815 | H5 | PRP | 671 | 7.183  | 50.832 | 9.069  | 1.00 | 0.00 |
| H      |      |    |     |     |        |        |        |      |      |
| HETATM | 9816 | C3 | PRP | 671 | 8.991  | 50.023 | 11.676 | 1.00 | 0.00 |
| C      |      |    |     |     |        |        |        |      |      |
| HETATM | 9817 | H6 | PRP | 671 | 10.019 | 50.252 | 11.398 | 1.00 | 0.00 |
| H      |      |    |     |     |        |        |        |      |      |
| HETATM | 9818 | H7 | PRP | 671 | 8.890  | 50.236 | 12.740 | 1.00 | 0.00 |
| H      |      |    |     |     |        |        |        |      |      |
| HETATM | 9819 | H8 | PRP | 671 | 8.830  | 48.948 | 11.763 | 1.00 | 0.00 |
| H      |      |    |     |     |        |        |        |      |      |
| HETATM | 9820 | O1 | PRP | 672 | 27.394 | 38.536 | 11.179 | 1.00 | 0.00 |
| O      |      |    |     |     |        |        |        |      |      |
| HETATM | 9821 | H1 | PRP | 672 | 28.281 | 38.793 | 11.442 | 1.00 | 0.00 |
| H      |      |    |     |     |        |        |        |      |      |
| HETATM | 9822 | C1 | PRP | 672 | 27.602 | 37.356 | 10.441 | 1.00 | 0.00 |
| C      |      |    |     |     |        |        |        |      |      |
| HETATM | 9823 | H2 | PRP | 672 | 27.249 | 36.667 | 11.209 | 1.00 | 0.00 |
| H      |      |    |     |     |        |        |        |      |      |
| HETATM | 9824 | H3 | PRP | 672 | 27.105 | 37.331 | 9.471  | 1.00 | 0.00 |
| H      |      |    |     |     |        |        |        |      |      |
| HETATM | 9825 | C2 | PRP | 672 | 28.990 | 36.912 | 10.074 | 1.00 | 0.00 |
| C      |      |    |     |     |        |        |        |      |      |
| HETATM | 9826 | H4 | PRP | 672 | 28.820 | 36.003 | 9.497  | 1.00 | 0.00 |
| H      |      |    |     |     |        |        |        |      |      |
| HETATM | 9827 | O2 | PRP | 672 | 29.926 | 36.776 | 11.152 | 1.00 | 0.00 |
| O      |      |    |     |     |        |        |        |      |      |

|        |      |    |     |     |        |        |        |      |      |
|--------|------|----|-----|-----|--------|--------|--------|------|------|
| HETATM | 9828 | H5 | PRP | 672 | 30.826 | 36.891 | 10.838 | 1.00 | 0.00 |
| H      |      |    |     |     |        |        |        |      |      |
| HETATM | 9829 | C3 | PRP | 672 | 29.563 | 37.926 | 9.079  | 1.00 | 0.00 |
| C      |      |    |     |     |        |        |        |      |      |
| HETATM | 9830 | H6 | PRP | 672 | 30.525 | 37.586 | 8.698  | 1.00 | 0.00 |
| H      |      |    |     |     |        |        |        |      |      |
| HETATM | 9831 | H7 | PRP | 672 | 28.941 | 38.118 | 8.205  | 1.00 | 0.00 |
| H      |      |    |     |     |        |        |        |      |      |
| HETATM | 9832 | H8 | PRP | 672 | 29.631 | 38.948 | 9.452  | 1.00 | 0.00 |
| H      |      |    |     |     |        |        |        |      |      |
| HETATM | 9833 | O1 | PRP | 673 | 26.724 | 49.574 | 20.257 | 1.00 | 0.00 |
| O      |      |    |     |     |        |        |        |      |      |
| HETATM | 9834 | H1 | PRP | 673 | 26.169 | 49.545 | 19.474 | 1.00 | 0.00 |
| H      |      |    |     |     |        |        |        |      |      |
| HETATM | 9835 | C1 | PRP | 673 | 27.505 | 50.790 | 20.117 | 1.00 | 0.00 |
| C      |      |    |     |     |        |        |        |      |      |
| HETATM | 9836 | H2 | PRP | 673 | 28.248 | 50.691 | 19.325 | 1.00 | 0.00 |
| H      |      |    |     |     |        |        |        |      |      |
| HETATM | 9837 | H3 | PRP | 673 | 26.893 | 51.640 | 19.814 | 1.00 | 0.00 |
| H      |      |    |     |     |        |        |        |      |      |
| HETATM | 9838 | C2 | PRP | 673 | 28.180 | 51.036 | 21.444 | 1.00 | 0.00 |
| C      |      |    |     |     |        |        |        |      |      |
| HETATM | 9839 | H4 | PRP | 673 | 28.896 | 50.221 | 21.553 | 1.00 | 0.00 |
| H      |      |    |     |     |        |        |        |      |      |
| HETATM | 9840 | O2 | PRP | 673 | 27.351 | 50.987 | 22.616 | 1.00 | 0.00 |
| O      |      |    |     |     |        |        |        |      |      |
| HETATM | 9841 | H5 | PRP | 673 | 26.938 | 50.120 | 22.595 | 1.00 | 0.00 |
| H      |      |    |     |     |        |        |        |      |      |
| HETATM | 9842 | C3 | PRP | 673 | 28.940 | 52.357 | 21.509 | 1.00 | 0.00 |
| C      |      |    |     |     |        |        |        |      |      |
| HETATM | 9843 | H6 | PRP | 673 | 29.039 | 52.561 | 22.575 | 1.00 | 0.00 |
| H      |      |    |     |     |        |        |        |      |      |
| HETATM | 9844 | H7 | PRP | 673 | 29.897 | 52.308 | 20.989 | 1.00 | 0.00 |
| H      |      |    |     |     |        |        |        |      |      |
| HETATM | 9845 | H8 | PRP | 673 | 28.279 | 53.093 | 21.051 | 1.00 | 0.00 |
| H      |      |    |     |     |        |        |        |      |      |
| HETATM | 9846 | O1 | PRP | 674 | 48.463 | 48.235 | 24.023 | 1.00 | 0.00 |
| O      |      |    |     |     |        |        |        |      |      |
| HETATM | 9847 | H1 | PRP | 674 | 47.658 | 47.796 | 24.309 | 1.00 | 0.00 |
| H      |      |    |     |     |        |        |        |      |      |
| HETATM | 9848 | C1 | PRP | 674 | 48.354 | 48.250 | 22.636 | 1.00 | 0.00 |
| C      |      |    |     |     |        |        |        |      |      |
| HETATM | 9849 | H2 | PRP | 674 | 49.361 | 48.267 | 22.220 | 1.00 | 0.00 |
| H      |      |    |     |     |        |        |        |      |      |
| HETATM | 9850 | H3 | PRP | 674 | 47.797 | 47.389 | 22.266 | 1.00 | 0.00 |
| H      |      |    |     |     |        |        |        |      |      |
| HETATM | 9851 | C2 | PRP | 674 | 47.798 | 49.573 | 22.157 | 1.00 | 0.00 |
| C      |      |    |     |     |        |        |        |      |      |
| HETATM | 9852 | H4 | PRP | 674 | 47.488 | 49.425 | 21.123 | 1.00 | 0.00 |
| H      |      |    |     |     |        |        |        |      |      |
| HETATM | 9853 | O2 | PRP | 674 | 48.708 | 50.613 | 22.272 | 1.00 | 0.00 |
| O      |      |    |     |     |        |        |        |      |      |
| HETATM | 9854 | H5 | PRP | 674 | 49.358 | 50.341 | 21.621 | 1.00 | 0.00 |
| H      |      |    |     |     |        |        |        |      |      |
| HETATM | 9855 | C3 | PRP | 674 | 46.413 | 50.025 | 22.752 | 1.00 | 0.00 |
| C      |      |    |     |     |        |        |        |      |      |

|        |      |    |     |     |        |        |        |      |      |
|--------|------|----|-----|-----|--------|--------|--------|------|------|
| HETATM | 9856 | H6 | PRP | 674 | 46.473 | 50.243 | 23.819 | 1.00 | 0.00 |
| H      |      |    |     |     |        |        |        |      |      |
| HETATM | 9857 | H7 | PRP | 674 | 46.009 | 50.914 | 22.267 | 1.00 | 0.00 |
| H      |      |    |     |     |        |        |        |      |      |
| HETATM | 9858 | H8 | PRP | 674 | 45.669 | 49.232 | 22.685 | 1.00 | 0.00 |
| H      |      |    |     |     |        |        |        |      |      |
| HETATM | 9859 | O1 | PRP | 675 | 37.078 | 49.916 | 16.247 | 1.00 | 0.00 |
| O      |      |    |     |     |        |        |        |      |      |
| HETATM | 9860 | H1 | PRP | 675 | 37.964 | 49.553 | 16.176 | 1.00 | 0.00 |
| H      |      |    |     |     |        |        |        |      |      |
| HETATM | 9861 | C1 | PRP | 675 | 36.176 | 49.176 | 15.402 | 1.00 | 0.00 |
| C      |      |    |     |     |        |        |        |      |      |
| HETATM | 9862 | H2 | PRP | 675 | 36.574 | 48.188 | 15.173 | 1.00 | 0.00 |
| H      |      |    |     |     |        |        |        |      |      |
| HETATM | 9863 | H3 | PRP | 675 | 35.164 | 49.070 | 15.795 | 1.00 | 0.00 |
| H      |      |    |     |     |        |        |        |      |      |
| HETATM | 9864 | C2 | PRP | 675 | 35.994 | 49.948 | 14.047 | 1.00 | 0.00 |
| C      |      |    |     |     |        |        |        |      |      |
| HETATM | 9865 | H4 | PRP | 675 | 35.252 | 49.420 | 13.448 | 1.00 | 0.00 |
| H      |      |    |     |     |        |        |        |      |      |
| HETATM | 9866 | O2 | PRP | 675 | 37.188 | 49.932 | 13.288 | 1.00 | 0.00 |
| O      |      |    |     |     |        |        |        |      |      |
| HETATM | 9867 | H5 | PRP | 675 | 36.903 | 50.269 | 12.435 | 1.00 | 0.00 |
| H      |      |    |     |     |        |        |        |      |      |
| HETATM | 9868 | C3 | PRP | 675 | 35.390 | 51.333 | 14.119 | 1.00 | 0.00 |
| C      |      |    |     |     |        |        |        |      |      |
| HETATM | 9869 | H6 | PRP | 675 | 36.205 | 52.057 | 14.145 | 1.00 | 0.00 |
| H      |      |    |     |     |        |        |        |      |      |
| HETATM | 9870 | H7 | PRP | 675 | 34.851 | 51.551 | 13.197 | 1.00 | 0.00 |
| H      |      |    |     |     |        |        |        |      |      |
| HETATM | 9871 | H8 | PRP | 675 | 34.766 | 51.388 | 15.010 | 1.00 | 0.00 |
| H      |      |    |     |     |        |        |        |      |      |
| HETATM | 9872 | O1 | PRP | 676 | 9.708  | 54.313 | 13.784 | 1.00 | 0.00 |
| O      |      |    |     |     |        |        |        |      |      |
| HETATM | 9873 | H1 | PRP | 676 | 9.234  | 53.547 | 14.115 | 1.00 | 0.00 |
| H      |      |    |     |     |        |        |        |      |      |
| HETATM | 9874 | C1 | PRP | 676 | 10.432 | 53.980 | 12.619 | 1.00 | 0.00 |
| C      |      |    |     |     |        |        |        |      |      |
| HETATM | 9875 | H2 | PRP | 676 | 11.427 | 53.620 | 12.880 | 1.00 | 0.00 |
| H      |      |    |     |     |        |        |        |      |      |
| HETATM | 9876 | H3 | PRP | 676 | 9.887  | 53.221 | 12.058 | 1.00 | 0.00 |
| H      |      |    |     |     |        |        |        |      |      |
| HETATM | 9877 | C2 | PRP | 676 | 10.646 | 55.284 | 11.889 | 1.00 | 0.00 |
| C      |      |    |     |     |        |        |        |      |      |
| HETATM | 9878 | H4 | PRP | 676 | 11.246 | 55.899 | 12.559 | 1.00 | 0.00 |
| H      |      |    |     |     |        |        |        |      |      |
| HETATM | 9879 | O2 | PRP | 676 | 9.413  | 55.906 | 11.785 | 1.00 | 0.00 |
| O      |      |    |     |     |        |        |        |      |      |
| HETATM | 9880 | H5 | PRP | 676 | 9.075  | 55.986 | 12.680 | 1.00 | 0.00 |
| H      |      |    |     |     |        |        |        |      |      |
| HETATM | 9881 | C3 | PRP | 676 | 11.250 | 55.003 | 10.558 | 1.00 | 0.00 |
| C      |      |    |     |     |        |        |        |      |      |
| HETATM | 9882 | H6 | PRP | 676 | 11.609 | 55.909 | 10.069 | 1.00 | 0.00 |
| H      |      |    |     |     |        |        |        |      |      |
| HETATM | 9883 | H7 | PRP | 676 | 12.036 | 54.271 | 10.742 | 1.00 | 0.00 |
| H      |      |    |     |     |        |        |        |      |      |

|        |      |    |     |     |        |        |        |      |      |
|--------|------|----|-----|-----|--------|--------|--------|------|------|
| HETATM | 9884 | H8 | PRP | 676 | 10.597 | 54.540 | 9.818  | 1.00 | 0.00 |
| H      |      |    |     |     |        |        |        |      |      |
| HETATM | 9885 | O1 | PRP | 677 | 36.597 | 57.554 | 23.532 | 1.00 | 0.00 |
| O      |      |    |     |     |        |        |        |      |      |
| HETATM | 9886 | H1 | PRP | 677 | 37.009 | 57.377 | 22.683 | 1.00 | 0.00 |
| H      |      |    |     |     |        |        |        |      |      |
| HETATM | 9887 | C1 | PRP | 677 | 35.191 | 57.611 | 23.424 | 1.00 | 0.00 |
| C      |      |    |     |     |        |        |        |      |      |
| HETATM | 9888 | H2 | PRP | 677 | 34.708 | 56.640 | 23.306 | 1.00 | 0.00 |
| H      |      |    |     |     |        |        |        |      |      |
| HETATM | 9889 | H3 | PRP | 677 | 34.804 | 57.913 | 24.397 | 1.00 | 0.00 |
| H      |      |    |     |     |        |        |        |      |      |
| HETATM | 9890 | C2 | PRP | 677 | 34.652 | 58.668 | 22.461 | 1.00 | 0.00 |
| C      |      |    |     |     |        |        |        |      |      |
| HETATM | 9891 | H4 | PRP | 677 | 34.860 | 58.349 | 21.440 | 1.00 | 0.00 |
| H      |      |    |     |     |        |        |        |      |      |
| HETATM | 9892 | O2 | PRP | 677 | 35.139 | 59.943 | 22.767 | 1.00 | 0.00 |
| O      |      |    |     |     |        |        |        |      |      |
| HETATM | 9893 | H5 | PRP | 677 | 34.762 | 60.339 | 23.556 | 1.00 | 0.00 |
| H      |      |    |     |     |        |        |        |      |      |
| HETATM | 9894 | C3 | PRP | 677 | 33.177 | 58.696 | 22.433 | 1.00 | 0.00 |
| C      |      |    |     |     |        |        |        |      |      |
| HETATM | 9895 | H6 | PRP | 677 | 32.811 | 57.735 | 22.071 | 1.00 | 0.00 |
| H      |      |    |     |     |        |        |        |      |      |
| HETATM | 9896 | H7 | PRP | 677 | 32.838 | 58.768 | 23.466 | 1.00 | 0.00 |
| H      |      |    |     |     |        |        |        |      |      |
| HETATM | 9897 | H8 | PRP | 677 | 32.894 | 59.588 | 21.874 | 1.00 | 0.00 |
| H      |      |    |     |     |        |        |        |      |      |
| HETATM | 9898 | O1 | PRP | 678 | 42.551 | 51.375 | 21.376 | 1.00 | 0.00 |
| O      |      |    |     |     |        |        |        |      |      |
| HETATM | 9899 | H1 | PRP | 678 | 41.724 | 51.823 | 21.571 | 1.00 | 0.00 |
| H      |      |    |     |     |        |        |        |      |      |
| HETATM | 9900 | C1 | PRP | 678 | 43.521 | 52.354 | 21.261 | 1.00 | 0.00 |
| C      |      |    |     |     |        |        |        |      |      |
| HETATM | 9901 | H2 | PRP | 678 | 43.518 | 52.914 | 22.196 | 1.00 | 0.00 |
| H      |      |    |     |     |        |        |        |      |      |
| HETATM | 9902 | H3 | PRP | 678 | 44.503 | 51.885 | 21.211 | 1.00 | 0.00 |
| H      |      |    |     |     |        |        |        |      |      |
| HETATM | 9903 | C2 | PRP | 678 | 43.461 | 53.418 | 20.062 | 1.00 | 0.00 |
| C      |      |    |     |     |        |        |        |      |      |
| HETATM | 9904 | H4 | PRP | 678 | 44.438 | 53.892 | 20.150 | 1.00 | 0.00 |
| H      |      |    |     |     |        |        |        |      |      |
| HETATM | 9905 | O2 | PRP | 678 | 42.364 | 54.294 | 20.135 | 1.00 | 0.00 |
| O      |      |    |     |     |        |        |        |      |      |
| HETATM | 9906 | H5 | PRP | 678 | 42.621 | 54.947 | 19.481 | 1.00 | 0.00 |
| H      |      |    |     |     |        |        |        |      |      |
| HETATM | 9907 | C3 | PRP | 678 | 43.363 | 52.688 | 18.692 | 1.00 | 0.00 |
| C      |      |    |     |     |        |        |        |      |      |
| HETATM | 9908 | H6 | PRP | 678 | 43.990 | 51.803 | 18.801 | 1.00 | 0.00 |
| H      |      |    |     |     |        |        |        |      |      |
| HETATM | 9909 | H7 | PRP | 678 | 42.335 | 52.526 | 18.370 | 1.00 | 0.00 |
| H      |      |    |     |     |        |        |        |      |      |
| HETATM | 9910 | H8 | PRP | 678 | 43.798 | 53.391 | 17.981 | 1.00 | 0.00 |
| H      |      |    |     |     |        |        |        |      |      |
| HETATM | 9911 | O1 | PRP | 679 | 32.573 | 36.734 | 10.094 | 1.00 | 0.00 |
| O      |      |    |     |     |        |        |        |      |      |

|        |      |    |     |     |        |        |        |      |      |
|--------|------|----|-----|-----|--------|--------|--------|------|------|
| HETATM | 9912 | H1 | PRP | 679 | 33.143 | 36.272 | 9.476  | 1.00 | 0.00 |
| H      |      |    |     |     |        |        |        |      |      |
| HETATM | 9913 | C1 | PRP | 679 | 33.160 | 36.899 | 11.398 | 1.00 | 0.00 |
| C      |      |    |     |     |        |        |        |      |      |
| HETATM | 9914 | H2 | PRP | 679 | 32.467 | 37.452 | 12.032 | 1.00 | 0.00 |
| H      |      |    |     |     |        |        |        |      |      |
| HETATM | 9915 | H3 | PRP | 679 | 33.153 | 35.973 | 11.972 | 1.00 | 0.00 |
| H      |      |    |     |     |        |        |        |      |      |
| HETATM | 9916 | C2 | PRP | 679 | 34.509 | 37.538 | 11.342 | 1.00 | 0.00 |
| C      |      |    |     |     |        |        |        |      |      |
| HETATM | 9917 | H4 | PRP | 679 | 34.565 | 38.356 | 10.624 | 1.00 | 0.00 |
| H      |      |    |     |     |        |        |        |      |      |
| HETATM | 9918 | O2 | PRP | 679 | 35.501 | 36.486 | 11.171 | 1.00 | 0.00 |
| O      |      |    |     |     |        |        |        |      |      |
| HETATM | 9919 | H5 | PRP | 679 | 35.293 | 35.839 | 11.848 | 1.00 | 0.00 |
| H      |      |    |     |     |        |        |        |      |      |
| HETATM | 9920 | C3 | PRP | 679 | 34.653 | 38.069 | 12.808 | 1.00 | 0.00 |
| C      |      |    |     |     |        |        |        |      |      |
| HETATM | 9921 | H6 | PRP | 679 | 33.850 | 38.760 | 13.065 | 1.00 | 0.00 |
| H      |      |    |     |     |        |        |        |      |      |
| HETATM | 9922 | H7 | PRP | 679 | 34.601 | 37.244 | 13.519 | 1.00 | 0.00 |
| H      |      |    |     |     |        |        |        |      |      |
| HETATM | 9923 | H8 | PRP | 679 | 35.613 | 38.586 | 12.799 | 1.00 | 0.00 |
| H      |      |    |     |     |        |        |        |      |      |
| HETATM | 9924 | O1 | PRP | 680 | 41.857 | 38.342 | 5.806  | 1.00 | 0.00 |
| O      |      |    |     |     |        |        |        |      |      |
| HETATM | 9925 | H1 | PRP | 680 | 40.936 | 38.274 | 6.071  | 1.00 | 0.00 |
| H      |      |    |     |     |        |        |        |      |      |
| HETATM | 9926 | C1 | PRP | 680 | 42.627 | 37.952 | 6.915  | 1.00 | 0.00 |
| C      |      |    |     |     |        |        |        |      |      |
| HETATM | 9927 | H2 | PRP | 680 | 43.534 | 38.535 | 6.756  | 1.00 | 0.00 |
| H      |      |    |     |     |        |        |        |      |      |
| HETATM | 9928 | H3 | PRP | 680 | 42.211 | 38.315 | 7.855  | 1.00 | 0.00 |
| H      |      |    |     |     |        |        |        |      |      |
| HETATM | 9929 | C2 | PRP | 680 | 42.996 | 36.455 | 7.010  | 1.00 | 0.00 |
| C      |      |    |     |     |        |        |        |      |      |
| HETATM | 9930 | H4 | PRP | 680 | 43.917 | 36.529 | 7.588  | 1.00 | 0.00 |
| H      |      |    |     |     |        |        |        |      |      |
| HETATM | 9931 | O2 | PRP | 680 | 43.389 | 35.924 | 5.729  | 1.00 | 0.00 |
| O      |      |    |     |     |        |        |        |      |      |
| HETATM | 9932 | H5 | PRP | 680 | 42.615 | 36.008 | 5.168  | 1.00 | 0.00 |
| H      |      |    |     |     |        |        |        |      |      |
| HETATM | 9933 | C3 | PRP | 680 | 41.964 | 35.620 | 7.630  | 1.00 | 0.00 |
| C      |      |    |     |     |        |        |        |      |      |
| HETATM | 9934 | H6 | PRP | 680 | 42.288 | 34.582 | 7.710  | 1.00 | 0.00 |
| H      |      |    |     |     |        |        |        |      |      |
| HETATM | 9935 | H7 | PRP | 680 | 41.770 | 35.916 | 8.660  | 1.00 | 0.00 |
| H      |      |    |     |     |        |        |        |      |      |
| HETATM | 9936 | H8 | PRP | 680 | 41.010 | 35.642 | 7.103  | 1.00 | 0.00 |
| H      |      |    |     |     |        |        |        |      |      |
| HETATM | 9937 | O1 | PRP | 681 | 28.694 | -3.284 | 27.402 | 1.00 | 0.00 |
| O      |      |    |     |     |        |        |        |      |      |
| HETATM | 9938 | H1 | PRP | 681 | 29.338 | -3.523 | 26.731 | 1.00 | 0.00 |
| H      |      |    |     |     |        |        |        |      |      |
| HETATM | 9939 | C1 | PRP | 681 | 29.018 | -1.934 | 27.750 | 1.00 | 0.00 |
| C      |      |    |     |     |        |        |        |      |      |

|        |      |    |     |     |        |        |        |      |      |
|--------|------|----|-----|-----|--------|--------|--------|------|------|
| HETATM | 9940 | H2 | PRP | 681 | 28.488 | -1.175 | 27.174 | 1.00 | 0.00 |
| H      |      |    |     |     |        |        |        |      |      |
| HETATM | 9941 | H3 | PRP | 681 | 28.717 | -1.814 | 28.790 | 1.00 | 0.00 |
| H      |      |    |     |     |        |        |        |      |      |
| HETATM | 9942 | C2 | PRP | 681 | 30.552 | -1.601 | 27.518 | 1.00 | 0.00 |
| C      |      |    |     |     |        |        |        |      |      |
| HETATM | 9943 | H4 | PRP | 681 | 30.847 | -0.625 | 27.904 | 1.00 | 0.00 |
| H      |      |    |     |     |        |        |        |      |      |
| HETATM | 9944 | O2 | PRP | 681 | 30.835 | -1.673 | 26.110 | 1.00 | 0.00 |
| O      |      |    |     |     |        |        |        |      |      |
| HETATM | 9945 | H5 | PRP | 681 | 31.555 | -1.046 | 26.011 | 1.00 | 0.00 |
| H      |      |    |     |     |        |        |        |      |      |
| HETATM | 9946 | C3 | PRP | 681 | 31.410 | -2.686 | 28.160 | 1.00 | 0.00 |
| C      |      |    |     |     |        |        |        |      |      |
| HETATM | 9947 | H6 | PRP | 681 | 32.416 | -2.698 | 27.740 | 1.00 | 0.00 |
| H      |      |    |     |     |        |        |        |      |      |
| HETATM | 9948 | H7 | PRP | 681 | 31.424 | -2.324 | 29.188 | 1.00 | 0.00 |
| H      |      |    |     |     |        |        |        |      |      |
| HETATM | 9949 | H8 | PRP | 681 | 30.902 | -3.650 | 28.148 | 1.00 | 0.00 |
| H      |      |    |     |     |        |        |        |      |      |
| HETATM | 9950 | O1 | PRP | 682 | 16.119 | -1.895 | 36.543 | 1.00 | 0.00 |
| O      |      |    |     |     |        |        |        |      |      |
| HETATM | 9951 | H1 | PRP | 682 | 16.273 | -2.071 | 35.612 | 1.00 | 0.00 |
| H      |      |    |     |     |        |        |        |      |      |
| HETATM | 9952 | C1 | PRP | 682 | 17.384 | -1.883 | 37.197 | 1.00 | 0.00 |
| C      |      |    |     |     |        |        |        |      |      |
| HETATM | 9953 | H2 | PRP | 682 | 17.930 | -0.997 | 36.872 | 1.00 | 0.00 |
| H      |      |    |     |     |        |        |        |      |      |
| HETATM | 9954 | H3 | PRP | 682 | 17.399 | -1.973 | 38.283 | 1.00 | 0.00 |
| H      |      |    |     |     |        |        |        |      |      |
| HETATM | 9955 | C2 | PRP | 682 | 18.191 | -3.176 | 36.653 | 1.00 | 0.00 |
| C      |      |    |     |     |        |        |        |      |      |
| HETATM | 9956 | H4 | PRP | 682 | 19.161 | -3.290 | 37.137 | 1.00 | 0.00 |
| H      |      |    |     |     |        |        |        |      |      |
| HETATM | 9957 | O2 | PRP | 682 | 18.486 | -2.980 | 35.251 | 1.00 | 0.00 |
| O      |      |    |     |     |        |        |        |      |      |
| HETATM | 9958 | H5 | PRP | 682 | 19.168 | -3.579 | 34.939 | 1.00 | 0.00 |
| H      |      |    |     |     |        |        |        |      |      |
| HETATM | 9959 | C3 | PRP | 682 | 17.377 | -4.456 | 36.899 | 1.00 | 0.00 |
| C      |      |    |     |     |        |        |        |      |      |
| HETATM | 9960 | H6 | PRP | 682 | 17.185 | -4.517 | 37.970 | 1.00 | 0.00 |
| H      |      |    |     |     |        |        |        |      |      |
| HETATM | 9961 | H7 | PRP | 682 | 16.401 | -4.233 | 36.467 | 1.00 | 0.00 |
| H      |      |    |     |     |        |        |        |      |      |
| HETATM | 9962 | H8 | PRP | 682 | 17.816 | -5.374 | 36.508 | 1.00 | 0.00 |
| H      |      |    |     |     |        |        |        |      |      |
| HETATM | 9963 | O1 | PRP | 683 | 26.695 | -7.808 | 24.416 | 1.00 | 0.00 |
| O      |      |    |     |     |        |        |        |      |      |
| HETATM | 9964 | H1 | PRP | 683 | 27.072 | -8.445 | 25.026 | 1.00 | 0.00 |
| H      |      |    |     |     |        |        |        |      |      |
| HETATM | 9965 | C1 | PRP | 683 | 26.352 | -6.640 | 25.107 | 1.00 | 0.00 |
| C      |      |    |     |     |        |        |        |      |      |
| HETATM | 9966 | H2 | PRP | 683 | 27.094 | -6.209 | 25.779 | 1.00 | 0.00 |
| H      |      |    |     |     |        |        |        |      |      |
| HETATM | 9967 | H3 | PRP | 683 | 26.098 | -5.893 | 24.354 | 1.00 | 0.00 |
| H      |      |    |     |     |        |        |        |      |      |

|        |      |    |     |     |        |        |        |      |      |
|--------|------|----|-----|-----|--------|--------|--------|------|------|
| HETATM | 9968 | C2 | PRP | 683 | 25.075 | -6.857 | 25.929 | 1.00 | 0.00 |
| C      |      |    |     |     |        |        |        |      |      |
| HETATM | 9969 | H4 | PRP | 683 | 25.242 | -7.662 | 26.645 | 1.00 | 0.00 |
| H      |      |    |     |     |        |        |        |      |      |
| HETATM | 9970 | O2 | PRP | 683 | 23.909 | -6.967 | 25.176 | 1.00 | 0.00 |
| O      |      |    |     |     |        |        |        |      |      |
| HETATM | 9971 | H5 | PRP | 683 | 23.848 | -7.882 | 24.892 | 1.00 | 0.00 |
| H      |      |    |     |     |        |        |        |      |      |
| HETATM | 9972 | C3 | PRP | 683 | 24.761 | -5.576 | 26.867 | 1.00 | 0.00 |
| C      |      |    |     |     |        |        |        |      |      |
| HETATM | 9973 | H6 | PRP | 683 | 24.363 | -4.750 | 26.278 | 1.00 | 0.00 |
| H      |      |    |     |     |        |        |        |      |      |
| HETATM | 9974 | H7 | PRP | 683 | 23.930 | -5.811 | 27.533 | 1.00 | 0.00 |
| H      |      |    |     |     |        |        |        |      |      |
| HETATM | 9975 | H8 | PRP | 683 | 25.703 | -5.353 | 27.368 | 1.00 | 0.00 |
| H      |      |    |     |     |        |        |        |      |      |
| HETATM | 9976 | O1 | PRP | 684 | 28.081 | 4.995  | 25.852 | 1.00 | 0.00 |
| O      |      |    |     |     |        |        |        |      |      |
| HETATM | 9977 | H1 | PRP | 684 | 28.385 | 5.877  | 26.077 | 1.00 | 0.00 |
| H      |      |    |     |     |        |        |        |      |      |
| HETATM | 9978 | C1 | PRP | 684 | 29.146 | 4.108  | 25.967 | 1.00 | 0.00 |
| C      |      |    |     |     |        |        |        |      |      |
| HETATM | 9979 | H2 | PRP | 684 | 29.195 | 3.692  | 24.961 | 1.00 | 0.00 |
| H      |      |    |     |     |        |        |        |      |      |
| HETATM | 9980 | H3 | PRP | 684 | 30.107 | 4.593  | 26.139 | 1.00 | 0.00 |
| H      |      |    |     |     |        |        |        |      |      |
| HETATM | 9981 | C2 | PRP | 684 | 28.859 | 3.064  | 26.996 | 1.00 | 0.00 |
| C      |      |    |     |     |        |        |        |      |      |
| HETATM | 9982 | H4 | PRP | 684 | 27.900 | 2.648  | 26.686 | 1.00 | 0.00 |
| H      |      |    |     |     |        |        |        |      |      |
| HETATM | 9983 | O2 | PRP | 684 | 28.748 | 3.635  | 28.294 | 1.00 | 0.00 |
| O      |      |    |     |     |        |        |        |      |      |
| HETATM | 9984 | H5 | PRP | 684 | 29.181 | 4.478  | 28.139 | 1.00 | 0.00 |
| H      |      |    |     |     |        |        |        |      |      |
| HETATM | 9985 | C3 | PRP | 684 | 29.897 | 1.879  | 26.957 | 1.00 | 0.00 |
| C      |      |    |     |     |        |        |        |      |      |
| HETATM | 9986 | H6 | PRP | 684 | 29.723 | 1.338  | 27.887 | 1.00 | 0.00 |
| H      |      |    |     |     |        |        |        |      |      |
| HETATM | 9987 | H7 | PRP | 684 | 29.755 | 1.274  | 26.062 | 1.00 | 0.00 |
| H      |      |    |     |     |        |        |        |      |      |
| HETATM | 9988 | H8 | PRP | 684 | 30.795 | 2.495  | 26.908 | 1.00 | 0.00 |
| H      |      |    |     |     |        |        |        |      |      |
| HETATM | 9989 | O1 | PRP | 685 | 20.361 | -4.854 | 34.582 | 1.00 | 0.00 |
| O      |      |    |     |     |        |        |        |      |      |
| HETATM | 9990 | H1 | PRP | 685 | 21.277 | -4.655 | 34.374 | 1.00 | 0.00 |
| H      |      |    |     |     |        |        |        |      |      |
| HETATM | 9991 | C1 | PRP | 685 | 20.332 | -6.010 | 35.430 | 1.00 | 0.00 |
| C      |      |    |     |     |        |        |        |      |      |
| HETATM | 9992 | H2 | PRP | 685 | 20.477 | -5.709 | 36.468 | 1.00 | 0.00 |
| H      |      |    |     |     |        |        |        |      |      |
| HETATM | 9993 | H3 | PRP | 685 | 19.335 | -6.434 | 35.317 | 1.00 | 0.00 |
| H      |      |    |     |     |        |        |        |      |      |
| HETATM | 9994 | C2 | PRP | 685 | 21.382 | -6.982 | 34.992 | 1.00 | 0.00 |
| C      |      |    |     |     |        |        |        |      |      |
| HETATM | 9995 | H4 | PRP | 685 | 21.487 | -7.619 | 35.870 | 1.00 | 0.00 |
| H      |      |    |     |     |        |        |        |      |      |



|             |    |     |     |        |         |        |      |      |
|-------------|----|-----|-----|--------|---------|--------|------|------|
| HETATM 9996 | O2 | PRP | 685 | 22.667 | -6.453  | 34.757 | 1.00 | 0.00 |
| O           |    |     |     |        |         |        |      |      |
| HETATM 9997 | H5 | PRP | 685 | 23.266 | -7.196  | 34.653 | 1.00 | 0.00 |
| H           |    |     |     |        |         |        |      |      |
| HETATM 9998 | C3 | PRP | 685 | 20.978 | -7.739  | 33.740 | 1.00 | 0.00 |
| C           |    |     |     |        |         |        |      |      |
| HETATM 9999 | H6 | PRP | 685 | 20.036 | -8.255  | 33.924 | 1.00 | 0.00 |
| H           |    |     |     |        |         |        |      |      |
| HETATM10000 | H7 | PRP | 685 | 20.666 | -7.017  | 32.985 | 1.00 | 0.00 |
| H           |    |     |     |        |         |        |      |      |
| HETATM10001 | H8 | PRP | 685 | 21.713 | -8.471  | 33.404 | 1.00 | 0.00 |
| H           |    |     |     |        |         |        |      |      |
| HETATM10002 | O1 | PRP | 686 | 27.131 | -15.802 | 30.174 | 1.00 | 0.00 |
| O           |    |     |     |        |         |        |      |      |
| HETATM10003 | H1 | PRP | 686 | 26.469 | -15.919 | 30.859 | 1.00 | 0.00 |
| H           |    |     |     |        |         |        |      |      |
| HETATM10004 | C1 | PRP | 686 | 26.835 | -14.670 | 29.478 | 1.00 | 0.00 |
| C           |    |     |     |        |         |        |      |      |
| HETATM10005 | H2 | PRP | 686 | 26.844 | -13.795 | 30.128 | 1.00 | 0.00 |
| H           |    |     |     |        |         |        |      |      |
| HETATM10006 | H3 | PRP | 686 | 27.531 | -14.525 | 28.652 | 1.00 | 0.00 |
| H           |    |     |     |        |         |        |      |      |
| HETATM10007 | C2 | PRP | 686 | 25.488 | -14.847 | 28.867 | 1.00 | 0.00 |
| C           |    |     |     |        |         |        |      |      |
| HETATM10008 | H4 | PRP | 686 | 24.742 | -15.090 | 29.624 | 1.00 | 0.00 |
| H           |    |     |     |        |         |        |      |      |
| HETATM10009 | O2 | PRP | 686 | 25.551 | -15.756 | 27.710 | 1.00 | 0.00 |
| O           |    |     |     |        |         |        |      |      |
| HETATM10010 | H5 | PRP | 686 | 25.722 | -16.588 | 28.156 | 1.00 | 0.00 |
| H           |    |     |     |        |         |        |      |      |
| HETATM10011 | C3 | PRP | 686 | 25.098 | -13.460 | 28.244 | 1.00 | 0.00 |
| C           |    |     |     |        |         |        |      |      |
| HETATM10012 | H6 | PRP | 686 | 25.658 | -13.383 | 27.312 | 1.00 | 0.00 |
| H           |    |     |     |        |         |        |      |      |
| HETATM10013 | H7 | PRP | 686 | 24.044 | -13.358 | 27.984 | 1.00 | 0.00 |
| H           |    |     |     |        |         |        |      |      |
| HETATM10014 | H8 | PRP | 686 | 25.278 | -12.668 | 28.971 | 1.00 | 0.00 |
| H           |    |     |     |        |         |        |      |      |
| HETATM10015 | O1 | PRP | 687 | 11.568 | -2.039  | 25.874 | 1.00 | 0.00 |
| O           |    |     |     |        |         |        |      |      |
| HETATM10016 | H1 | PRP | 687 | 11.840 | -2.835  | 25.411 | 1.00 | 0.00 |
| H           |    |     |     |        |         |        |      |      |
| HETATM10017 | C1 | PRP | 687 | 12.546 | -1.012  | 25.793 | 1.00 | 0.00 |
| C           |    |     |     |        |         |        |      |      |
| HETATM10018 | H2 | PRP | 687 | 13.064 | -0.982  | 26.752 | 1.00 | 0.00 |
| H           |    |     |     |        |         |        |      |      |
| HETATM10019 | H3 | PRP | 687 | 13.240 | -1.117  | 24.960 | 1.00 | 0.00 |
| H           |    |     |     |        |         |        |      |      |
| HETATM10020 | C2 | PRP | 687 | 11.930 | 0.343   | 25.565 | 1.00 | 0.00 |
| C           |    |     |     |        |         |        |      |      |
| HETATM10021 | H4 | PRP | 687 | 11.220 | 0.433   | 26.387 | 1.00 | 0.00 |
| H           |    |     |     |        |         |        |      |      |
| HETATM10022 | O2 | PRP | 687 | 11.348 | 0.412   | 24.265 | 1.00 | 0.00 |
| O           |    |     |     |        |         |        |      |      |
| HETATM10023 | H5 | PRP | 687 | 11.125 | -0.475  | 23.975 | 1.00 | 0.00 |
| H           |    |     |     |        |         |        |      |      |

|             |    |     |     |        |        |        |      |      |
|-------------|----|-----|-----|--------|--------|--------|------|------|
| HETATM10024 | C3 | PRP | 687 | 13.070 | 1.405  | 25.785 | 1.00 | 0.00 |
| C           |    |     |     |        |        |        |      |      |
| HETATM10025 | H6 | PRP | 687 | 13.517 | 1.488  | 26.776 | 1.00 | 0.00 |
| H           |    |     |     |        |        |        |      |      |
| HETATM10026 | H7 | PRP | 687 | 13.861 | 1.206  | 25.061 | 1.00 | 0.00 |
| H           |    |     |     |        |        |        |      |      |
| HETATM10027 | H8 | PRP | 687 | 12.632 | 2.346  | 25.455 | 1.00 | 0.00 |
| H           |    |     |     |        |        |        |      |      |
| HETATM10028 | O1 | PRP | 688 | 22.715 | 0.410  | 17.710 | 1.00 | 0.00 |
| O           |    |     |     |        |        |        |      |      |
| HETATM10029 | H1 | PRP | 688 | 22.395 | -0.495 | 17.695 | 1.00 | 0.00 |
| H           |    |     |     |        |        |        |      |      |
| HETATM10030 | C1 | PRP | 688 | 22.882 | 0.890  | 19.058 | 1.00 | 0.00 |
| C           |    |     |     |        |        |        |      |      |
| HETATM10031 | H2 | PRP | 688 | 23.781 | 0.382  | 19.406 | 1.00 | 0.00 |
| H           |    |     |     |        |        |        |      |      |
| HETATM10032 | H3 | PRP | 688 | 23.061 | 1.962  | 18.972 | 1.00 | 0.00 |
| H           |    |     |     |        |        |        |      |      |
| HETATM10033 | C2 | PRP | 688 | 21.695 | 0.560  | 19.950 | 1.00 | 0.00 |
| C           |    |     |     |        |        |        |      |      |
| HETATM10034 | H4 | PRP | 688 | 21.832 | 0.936  | 20.964 | 1.00 | 0.00 |
| H           |    |     |     |        |        |        |      |      |
| HETATM10035 | O2 | PRP | 688 | 21.447 | -0.821 | 19.971 | 1.00 | 0.00 |
| O           |    |     |     |        |        |        |      |      |
| HETATM10036 | H5 | PRP | 688 | 22.222 | -1.343 | 20.193 | 1.00 | 0.00 |
| H           |    |     |     |        |        |        |      |      |
| HETATM10037 | C3 | PRP | 688 | 20.330 | 0.983  | 19.438 | 1.00 | 0.00 |
| C           |    |     |     |        |        |        |      |      |
| HETATM10038 | H6 | PRP | 688 | 20.157 | 0.718  | 18.394 | 1.00 | 0.00 |
| H           |    |     |     |        |        |        |      |      |
| HETATM10039 | H7 | PRP | 688 | 19.555 | 0.492  | 20.027 | 1.00 | 0.00 |
| H           |    |     |     |        |        |        |      |      |
| HETATM10040 | H8 | PRP | 688 | 20.208 | 2.065  | 19.386 | 1.00 | 0.00 |
| H           |    |     |     |        |        |        |      |      |
| HETATM10041 | O1 | PRP | 689 | 26.469 | -0.140 | 14.394 | 1.00 | 0.00 |
| O           |    |     |     |        |        |        |      |      |
| HETATM10042 | H1 | PRP | 689 | 25.532 | -0.327 | 14.303 | 1.00 | 0.00 |
| H           |    |     |     |        |        |        |      |      |
| HETATM10043 | C1 | PRP | 689 | 26.981 | -0.905 | 15.505 | 1.00 | 0.00 |
| C           |    |     |     |        |        |        |      |      |
| HETATM10044 | H2 | PRP | 689 | 26.560 | -1.906 | 15.411 | 1.00 | 0.00 |
| H           |    |     |     |        |        |        |      |      |
| HETATM10045 | H3 | PRP | 689 | 28.059 | -1.044 | 15.429 | 1.00 | 0.00 |
| H           |    |     |     |        |        |        |      |      |
| HETATM10046 | C2 | PRP | 689 | 26.603 | -0.321 | 16.807 | 1.00 | 0.00 |
| C           |    |     |     |        |        |        |      |      |
| HETATM10047 | H4 | PRP | 689 | 25.584 | 0.062  | 16.865 | 1.00 | 0.00 |
| H           |    |     |     |        |        |        |      |      |
| HETATM10048 | O2 | PRP | 689 | 27.503 | 0.674  | 17.232 | 1.00 | 0.00 |
| O           |    |     |     |        |        |        |      |      |
| HETATM10049 | H5 | PRP | 689 | 27.092 | 1.484  | 16.922 | 1.00 | 0.00 |
| H           |    |     |     |        |        |        |      |      |
| HETATM10050 | C3 | PRP | 689 | 26.696 | -1.545 | 17.804 | 1.00 | 0.00 |
| C           |    |     |     |        |        |        |      |      |
| HETATM10051 | H6 | PRP | 689 | 26.239 | -1.171 | 18.721 | 1.00 | 0.00 |
| H           |    |     |     |        |        |        |      |      |

|             |    |     |     |        |        |        |      |      |
|-------------|----|-----|-----|--------|--------|--------|------|------|
| HETATM10052 | H7 | PRP | 689 | 26.158 | -2.450 | 17.521 | 1.00 | 0.00 |
| H           |    |     |     |        |        |        |      |      |
| HETATM10053 | H8 | PRP | 689 | 27.760 | -1.623 | 18.026 | 1.00 | 0.00 |
| H           |    |     |     |        |        |        |      |      |
| HETATM10054 | O1 | PRP | 690 | 12.088 | -5.489 | 18.684 | 1.00 | 0.00 |
| O           |    |     |     |        |        |        |      |      |
| HETATM10055 | H1 | PRP | 690 | 12.620 | -6.213 | 18.347 | 1.00 | 0.00 |
| H           |    |     |     |        |        |        |      |      |
| HETATM10056 | C1 | PRP | 690 | 10.747 | -5.693 | 18.206 | 1.00 | 0.00 |
| C           |    |     |     |        |        |        |      |      |
| HETATM10057 | H2 | PRP | 690 | 10.088 | -5.803 | 19.067 | 1.00 | 0.00 |
| H           |    |     |     |        |        |        |      |      |
| HETATM10058 | H3 | PRP | 690 | 10.408 | -4.827 | 17.638 | 1.00 | 0.00 |
| H           |    |     |     |        |        |        |      |      |
| HETATM10059 | C2 | PRP | 690 | 10.676 | -6.892 | 17.225 | 1.00 | 0.00 |
| C           |    |     |     |        |        |        |      |      |
| HETATM10060 | H4 | PRP | 690 | 9.602  | -7.034 | 17.100 | 1.00 | 0.00 |
| H           |    |     |     |        |        |        |      |      |
| HETATM10061 | O2 | PRP | 690 | 11.148 | -8.091 | 17.768 | 1.00 | 0.00 |
| O           |    |     |     |        |        |        |      |      |
| HETATM10062 | H5 | PRP | 690 | 10.929 | -8.793 | 17.151 | 1.00 | 0.00 |
| H           |    |     |     |        |        |        |      |      |
| HETATM10063 | C3 | PRP | 690 | 11.340 | -6.585 | 15.878 | 1.00 | 0.00 |
| C           |    |     |     |        |        |        |      |      |
| HETATM10064 | H6 | PRP | 690 | 12.423 | -6.683 | 15.953 | 1.00 | 0.00 |
| H           |    |     |     |        |        |        |      |      |
| HETATM10065 | H7 | PRP | 690 | 10.960 | -7.292 | 15.140 | 1.00 | 0.00 |
| H           |    |     |     |        |        |        |      |      |
| HETATM10066 | H8 | PRP | 690 | 11.155 | -5.560 | 15.557 | 1.00 | 0.00 |
| H           |    |     |     |        |        |        |      |      |
| HETATM10067 | O1 | PRP | 691 | 15.414 | -8.441 | 25.092 | 1.00 | 0.00 |
| O           |    |     |     |        |        |        |      |      |
| HETATM10068 | H1 | PRP | 691 | 14.897 | -9.138 | 24.681 | 1.00 | 0.00 |
| H           |    |     |     |        |        |        |      |      |
| HETATM10069 | C1 | PRP | 691 | 15.465 | -7.366 | 24.263 | 1.00 | 0.00 |
| C           |    |     |     |        |        |        |      |      |
| HETATM10070 | H2 | PRP | 691 | 15.247 | -7.702 | 23.249 | 1.00 | 0.00 |
| H           |    |     |     |        |        |        |      |      |
| HETATM10071 | H3 | PRP | 691 | 14.623 | -6.713 | 24.492 | 1.00 | 0.00 |
| H           |    |     |     |        |        |        |      |      |
| HETATM10072 | C2 | PRP | 691 | 16.817 | -6.653 | 24.272 | 1.00 | 0.00 |
| C           |    |     |     |        |        |        |      |      |
| HETATM10073 | H4 | PRP | 691 | 17.608 | -7.395 | 24.165 | 1.00 | 0.00 |
| H           |    |     |     |        |        |        |      |      |
| HETATM10074 | O2 | PRP | 691 | 16.924 | -5.920 | 25.444 | 1.00 | 0.00 |
| O           |    |     |     |        |        |        |      |      |
| HETATM10075 | H5 | PRP | 691 | 16.741 | -6.434 | 26.234 | 1.00 | 0.00 |
| H           |    |     |     |        |        |        |      |      |
| HETATM10076 | C3 | PRP | 691 | 16.916 | -5.618 | 23.169 | 1.00 | 0.00 |
| C           |    |     |     |        |        |        |      |      |
| HETATM10077 | H6 | PRP | 691 | 16.739 | -6.026 | 22.174 | 1.00 | 0.00 |
| H           |    |     |     |        |        |        |      |      |
| HETATM10078 | H7 | PRP | 691 | 16.174 | -4.857 | 23.411 | 1.00 | 0.00 |
| H           |    |     |     |        |        |        |      |      |
| HETATM10079 | H8 | PRP | 691 | 17.924 | -5.206 | 23.204 | 1.00 | 0.00 |
| H           |    |     |     |        |        |        |      |      |

|             |    |     |     |        |         |        |      |      |
|-------------|----|-----|-----|--------|---------|--------|------|------|
| HETATM10080 | O1 | PRP | 692 | 15.108 | 0.093   | 13.202 | 1.00 | 0.00 |
| O           |    |     |     |        |         |        |      |      |
| HETATM10081 | H1 | PRP | 692 | 15.154 | -0.754  | 12.751 | 1.00 | 0.00 |
| H           |    |     |     |        |         |        |      |      |
| HETATM10082 | C1 | PRP | 692 | 15.205 | 1.072   | 12.184 | 1.00 | 0.00 |
| C           |    |     |     |        |         |        |      |      |
| HETATM10083 | H2 | PRP | 692 | 14.199 | 1.207   | 11.787 | 1.00 | 0.00 |
| H           |    |     |     |        |         |        |      |      |
| HETATM10084 | H3 | PRP | 692 | 15.599 | 1.956   | 12.687 | 1.00 | 0.00 |
| H           |    |     |     |        |         |        |      |      |
| HETATM10085 | C2 | PRP | 692 | 16.246 | 0.736   | 11.106 | 1.00 | 0.00 |
| C           |    |     |     |        |         |        |      |      |
| HETATM10086 | H4 | PRP | 692 | 16.125 | -0.334  | 10.934 | 1.00 | 0.00 |
| H           |    |     |     |        |         |        |      |      |
| HETATM10087 | O2 | PRP | 692 | 17.539 | 1.141   | 11.492 | 1.00 | 0.00 |
| O           |    |     |     |        |         |        |      |      |
| HETATM10088 | H5 | PRP | 692 | 17.827 | 0.554   | 12.195 | 1.00 | 0.00 |
| H           |    |     |     |        |         |        |      |      |
| HETATM10089 | C3 | PRP | 692 | 15.855 | 1.342   | 9.765  | 1.00 | 0.00 |
| C           |    |     |     |        |         |        |      |      |
| HETATM10090 | H6 | PRP | 692 | 14.803 | 1.077   | 9.659  | 1.00 | 0.00 |
| H           |    |     |     |        |         |        |      |      |
| HETATM10091 | H7 | PRP | 692 | 15.933 | 2.425   | 9.863  | 1.00 | 0.00 |
| H           |    |     |     |        |         |        |      |      |
| HETATM10092 | H8 | PRP | 692 | 16.532 | 0.968   | 8.997  | 1.00 | 0.00 |
| H           |    |     |     |        |         |        |      |      |
| HETATM10093 | O1 | PRP | 693 | 23.668 | -0.154  | 14.898 | 1.00 | 0.00 |
| O           |    |     |     |        |         |        |      |      |
| HETATM10094 | H1 | PRP | 693 | 23.334 | 0.390   | 15.615 | 1.00 | 0.00 |
| H           |    |     |     |        |         |        |      |      |
| HETATM10095 | C1 | PRP | 693 | 22.570 | -0.096  | 13.920 | 1.00 | 0.00 |
| C           |    |     |     |        |         |        |      |      |
| HETATM10096 | H2 | PRP | 693 | 22.954 | -0.479  | 12.975 | 1.00 | 0.00 |
| H           |    |     |     |        |         |        |      |      |
| HETATM10097 | H3 | PRP | 693 | 21.766 | -0.720  | 14.309 | 1.00 | 0.00 |
| H           |    |     |     |        |         |        |      |      |
| HETATM10098 | C2 | PRP | 693 | 22.233 | 1.377   | 13.668 | 1.00 | 0.00 |
| C           |    |     |     |        |         |        |      |      |
| HETATM10099 | H4 | PRP | 693 | 23.194 | 1.832   | 13.430 | 1.00 | 0.00 |
| H           |    |     |     |        |         |        |      |      |
| HETATM10100 | O2 | PRP | 693 | 21.803 | 1.989   | 14.932 | 1.00 | 0.00 |
| O           |    |     |     |        |         |        |      |      |
| HETATM10101 | H5 | PRP | 693 | 21.620 | 2.906   | 14.717 | 1.00 | 0.00 |
| H           |    |     |     |        |         |        |      |      |
| HETATM10102 | C3 | PRP | 693 | 21.311 | 1.590   | 12.416 | 1.00 | 0.00 |
| C           |    |     |     |        |         |        |      |      |
| HETATM10103 | H6 | PRP | 693 | 21.392 | 0.701   | 11.790 | 1.00 | 0.00 |
| H           |    |     |     |        |         |        |      |      |
| HETATM10104 | H7 | PRP | 693 | 20.284 | 1.457   | 12.755 | 1.00 | 0.00 |
| H           |    |     |     |        |         |        |      |      |
| HETATM10105 | H8 | PRP | 693 | 21.445 | 2.527   | 11.875 | 1.00 | 0.00 |
| H           |    |     |     |        |         |        |      |      |
| HETATM10106 | O1 | PRP | 694 | 15.587 | -11.707 | 19.953 | 1.00 | 0.00 |
| O           |    |     |     |        |         |        |      |      |
| HETATM10107 | H1 | PRP | 694 | 15.484 | -11.167 | 20.740 | 1.00 | 0.00 |
| H           |    |     |     |        |         |        |      |      |

|             |    |     |     |        |         |        |      |      |
|-------------|----|-----|-----|--------|---------|--------|------|------|
| HETATM10108 | C1 | PRP | 694 | 14.335 | -12.307 | 19.607 | 1.00 | 0.00 |
| C           |    |     |     |        |         |        |      |      |
| HETATM10109 | H2 | PRP | 694 | 13.762 | -12.356 | 20.533 | 1.00 | 0.00 |
| H           |    |     |     |        |         |        |      |      |
| HETATM10110 | H3 | PRP | 694 | 13.865 | -11.612 | 18.910 | 1.00 | 0.00 |
| H           |    |     |     |        |         |        |      |      |
| HETATM10111 | C2 | PRP | 694 | 14.532 | -13.599 | 18.777 | 1.00 | 0.00 |
| C           |    |     |     |        |         |        |      |      |
| HETATM10112 | H4 | PRP | 694 | 15.276 | -14.102 | 19.395 | 1.00 | 0.00 |
| H           |    |     |     |        |         |        |      |      |
| HETATM10113 | O2 | PRP | 694 | 15.131 | -13.390 | 17.523 | 1.00 | 0.00 |
| O           |    |     |     |        |         |        |      |      |
| HETATM10114 | H5 | PRP | 694 | 16.064 | -13.614 | 17.497 | 1.00 | 0.00 |
| H           |    |     |     |        |         |        |      |      |
| HETATM10115 | C3 | PRP | 694 | 13.332 | -14.584 | 18.583 | 1.00 | 0.00 |
| C           |    |     |     |        |         |        |      |      |
| HETATM10116 | H6 | PRP | 694 | 12.931 | -14.737 | 19.584 | 1.00 | 0.00 |
| H           |    |     |     |        |         |        |      |      |
| HETATM10117 | H7 | PRP | 694 | 12.572 | -14.094 | 17.974 | 1.00 | 0.00 |
| H           |    |     |     |        |         |        |      |      |
| HETATM10118 | H8 | PRP | 694 | 13.724 | -15.522 | 18.189 | 1.00 | 0.00 |
| H           |    |     |     |        |         |        |      |      |
| HETATM10119 | O1 | PRP | 695 | 28.630 | -6.986  | 28.292 | 1.00 | 0.00 |
| O           |    |     |     |        |         |        |      |      |
| HETATM10120 | H1 | PRP | 695 | 27.990 | -7.634  | 28.598 | 1.00 | 0.00 |
| H           |    |     |     |        |         |        |      |      |
| HETATM10121 | C1 | PRP | 695 | 28.749 | -5.793  | 28.991 | 1.00 | 0.00 |
| C           |    |     |     |        |         |        |      |      |
| HETATM10122 | H2 | PRP | 695 | 29.580 | -5.209  | 28.594 | 1.00 | 0.00 |
| H           |    |     |     |        |         |        |      |      |
| HETATM10123 | H3 | PRP | 695 | 27.876 | -5.154  | 28.861 | 1.00 | 0.00 |
| H           |    |     |     |        |         |        |      |      |
| HETATM10124 | C2 | PRP | 695 | 29.083 | -5.986  | 30.530 | 1.00 | 0.00 |
| C           |    |     |     |        |         |        |      |      |
| HETATM10125 | H4 | PRP | 695 | 29.892 | -6.695  | 30.709 | 1.00 | 0.00 |
| H           |    |     |     |        |         |        |      |      |
| HETATM10126 | O2 | PRP | 695 | 27.909 | -6.525  | 31.173 | 1.00 | 0.00 |
| O           |    |     |     |        |         |        |      |      |
| HETATM10127 | H5 | PRP | 695 | 27.452 | -5.790  | 31.588 | 1.00 | 0.00 |
| H           |    |     |     |        |         |        |      |      |
| HETATM10128 | C3 | PRP | 695 | 29.510 | -4.785  | 31.204 | 1.00 | 0.00 |
| C           |    |     |     |        |         |        |      |      |
| HETATM10129 | H6 | PRP | 695 | 28.797 | -4.025  | 30.885 | 1.00 | 0.00 |
| H           |    |     |     |        |         |        |      |      |
| HETATM10130 | H7 | PRP | 695 | 29.462 | -4.876  | 32.289 | 1.00 | 0.00 |
| H           |    |     |     |        |         |        |      |      |
| HETATM10131 | H8 | PRP | 695 | 30.498 | -4.388  | 30.970 | 1.00 | 0.00 |
| H           |    |     |     |        |         |        |      |      |
| HETATM10132 | O1 | PRP | 696 | 18.543 | 6.170   | 23.984 | 1.00 | 0.00 |
| O           |    |     |     |        |         |        |      |      |
| HETATM10133 | H1 | PRP | 696 | 18.322 | 6.429   | 23.086 | 1.00 | 0.00 |
| H           |    |     |     |        |         |        |      |      |
| HETATM10134 | C1 | PRP | 696 | 19.976 | 6.367   | 24.097 | 1.00 | 0.00 |
| C           |    |     |     |        |         |        |      |      |
| HETATM10135 | H2 | PRP | 696 | 20.144 | 7.411   | 24.360 | 1.00 | 0.00 |
| H           |    |     |     |        |         |        |      |      |

|             |    |     |     |        |       |        |      |      |
|-------------|----|-----|-----|--------|-------|--------|------|------|
| HETATM10136 | H3 | PRP | 696 | 20.362 | 5.788 | 24.936 | 1.00 | 0.00 |
| H           |    |     |     |        |       |        |      |      |
| HETATM10137 | C2 | PRP | 696 | 20.720 | 6.001 | 22.791 | 1.00 | 0.00 |
| C           |    |     |     |        |       |        |      |      |
| HETATM10138 | H4 | PRP | 696 | 20.458 | 6.635 | 21.944 | 1.00 | 0.00 |
| H           |    |     |     |        |       |        |      |      |
| HETATM10139 | O2 | PRP | 696 | 20.280 | 4.727 | 22.500 | 1.00 | 0.00 |
| O           |    |     |     |        |       |        |      |      |
| HETATM10140 | H5 | PRP | 696 | 19.475 | 4.457 | 22.949 | 1.00 | 0.00 |
| H           |    |     |     |        |       |        |      |      |
| HETATM10141 | C3 | PRP | 696 | 22.209 | 6.106 | 22.884 | 1.00 | 0.00 |
| C           |    |     |     |        |       |        |      |      |
| HETATM10142 | H6 | PRP | 696 | 22.496 | 7.145 | 22.725 | 1.00 | 0.00 |
| H           |    |     |     |        |       |        |      |      |
| HETATM10143 | H7 | PRP | 696 | 22.570 | 5.605 | 23.783 | 1.00 | 0.00 |
| H           |    |     |     |        |       |        |      |      |
| HETATM10144 | H8 | PRP | 696 | 22.682 | 5.589 | 22.049 | 1.00 | 0.00 |
| H           |    |     |     |        |       |        |      |      |
| HETATM10145 | O1 | PRP | 697 | 24.936 | 1.896 | 21.427 | 1.00 | 0.00 |
| O           |    |     |     |        |       |        |      |      |
| HETATM10146 | H1 | PRP | 697 | 25.035 | 0.948 | 21.541 | 1.00 | 0.00 |
| H           |    |     |     |        |       |        |      |      |
| HETATM10147 | C1 | PRP | 697 | 24.251 | 2.441 | 22.518 | 1.00 | 0.00 |
| C           |    |     |     |        |       |        |      |      |
| HETATM10148 | H2 | PRP | 697 | 23.935 | 3.454 | 22.270 | 1.00 | 0.00 |
| H           |    |     |     |        |       |        |      |      |
| HETATM10149 | H3 | PRP | 697 | 23.360 | 1.855 | 22.745 | 1.00 | 0.00 |
| H           |    |     |     |        |       |        |      |      |
| HETATM10150 | C2 | PRP | 697 | 25.224 | 2.674 | 23.679 | 1.00 | 0.00 |
| C           |    |     |     |        |       |        |      |      |
| HETATM10151 | H4 | PRP | 697 | 26.187 | 3.032 | 23.314 | 1.00 | 0.00 |
| H           |    |     |     |        |       |        |      |      |
| HETATM10152 | O2 | PRP | 697 | 25.394 | 1.456 | 24.414 | 1.00 | 0.00 |
| O           |    |     |     |        |       |        |      |      |
| HETATM10153 | H5 | PRP | 697 | 26.220 | 1.052 | 24.137 | 1.00 | 0.00 |
| H           |    |     |     |        |       |        |      |      |
| HETATM10154 | C3 | PRP | 697 | 24.609 | 3.561 | 24.728 | 1.00 | 0.00 |
| C           |    |     |     |        |       |        |      |      |
| HETATM10155 | H6 | PRP | 697 | 24.395 | 4.585 | 24.422 | 1.00 | 0.00 |
| H           |    |     |     |        |       |        |      |      |
| HETATM10156 | H7 | PRP | 697 | 23.704 | 3.117 | 25.143 | 1.00 | 0.00 |
| H           |    |     |     |        |       |        |      |      |
| HETATM10157 | H8 | PRP | 697 | 25.328 | 3.685 | 25.539 | 1.00 | 0.00 |
| H           |    |     |     |        |       |        |      |      |
| HETATM10158 | O1 | PRP | 698 | 10.442 | 5.720 | 15.093 | 1.00 | 0.00 |
| O           |    |     |     |        |       |        |      |      |
| HETATM10159 | H1 | PRP | 698 | 11.065 | 5.446 | 14.416 | 1.00 | 0.00 |
| H           |    |     |     |        |       |        |      |      |
| HETATM10160 | C1 | PRP | 698 | 9.164  | 5.984 | 14.528 | 1.00 | 0.00 |
| C           |    |     |     |        |       |        |      |      |
| HETATM10161 | H2 | PRP | 698 | 8.859  | 5.216 | 13.817 | 1.00 | 0.00 |
| H           |    |     |     |        |       |        |      |      |
| HETATM10162 | H3 | PRP | 698 | 8.373  | 5.963 | 15.279 | 1.00 | 0.00 |
| H           |    |     |     |        |       |        |      |      |
| HETATM10163 | C2 | PRP | 698 | 9.289  | 7.457 | 13.934 | 1.00 | 0.00 |
| C           |    |     |     |        |       |        |      |      |

|             |    |     |     |        |        |        |      |      |
|-------------|----|-----|-----|--------|--------|--------|------|------|
| HETATM10164 | H4 | PRP | 698 | 10.057 | 7.363  | 13.167 | 1.00 | 0.00 |
| H           |    |     |     |        |        |        |      |      |
| HETATM10165 | O2 | PRP | 698 | 9.754  | 8.361  | 14.863 | 1.00 | 0.00 |
| O           |    |     |     |        |        |        |      |      |
| HETATM10166 | H5 | PRP | 698 | 10.510 | 7.902  | 15.236 | 1.00 | 0.00 |
| H           |    |     |     |        |        |        |      |      |
| HETATM10167 | C3 | PRP | 698 | 7.946  | 7.780  | 13.291 | 1.00 | 0.00 |
| C           |    |     |     |        |        |        |      |      |
| HETATM10168 | H6 | PRP | 698 | 7.158  | 7.939  | 14.026 | 1.00 | 0.00 |
| H           |    |     |     |        |        |        |      |      |
| HETATM10169 | H7 | PRP | 698 | 7.949  | 8.749  | 12.791 | 1.00 | 0.00 |
| H           |    |     |     |        |        |        |      |      |
| HETATM10170 | H8 | PRP | 698 | 7.777  | 6.886  | 12.691 | 1.00 | 0.00 |
| H           |    |     |     |        |        |        |      |      |
| HETATM10171 | O1 | PRP | 699 | 27.555 | 9.822  | 10.347 | 1.00 | 0.00 |
| O           |    |     |     |        |        |        |      |      |
| HETATM10172 | H1 | PRP | 699 | 27.025 | 9.550  | 11.100 | 1.00 | 0.00 |
| H           |    |     |     |        |        |        |      |      |
| HETATM10173 | C1 | PRP | 699 | 28.368 | 10.968 | 10.661 | 1.00 | 0.00 |
| C           |    |     |     |        |        |        |      |      |
| HETATM10174 | H2 | PRP | 699 | 27.743 | 11.798 | 10.990 | 1.00 | 0.00 |
| H           |    |     |     |        |        |        |      |      |
| HETATM10175 | H3 | PRP | 699 | 28.955 | 10.712 | 11.543 | 1.00 | 0.00 |
| H           |    |     |     |        |        |        |      |      |
| HETATM10176 | C2 | PRP | 699 | 29.208 | 11.487 | 9.516  | 1.00 | 0.00 |
| C           |    |     |     |        |        |        |      |      |
| HETATM10177 | H4 | PRP | 699 | 29.807 | 12.362 | 9.767  | 1.00 | 0.00 |
| H           |    |     |     |        |        |        |      |      |
| HETATM10178 | O2 | PRP | 699 | 28.448 | 11.807 | 8.387  | 1.00 | 0.00 |
| O           |    |     |     |        |        |        |      |      |
| HETATM10179 | H5 | PRP | 699 | 28.134 | 10.956 | 8.072  | 1.00 | 0.00 |
| H           |    |     |     |        |        |        |      |      |
| HETATM10180 | C3 | PRP | 699 | 30.158 | 10.389 | 9.142  | 1.00 | 0.00 |
| C           |    |     |     |        |        |        |      |      |
| HETATM10181 | H6 | PRP | 699 | 30.330 | 10.234 | 8.077  | 1.00 | 0.00 |
| H           |    |     |     |        |        |        |      |      |
| HETATM10182 | H7 | PRP | 699 | 31.144 | 10.600 | 9.556  | 1.00 | 0.00 |
| H           |    |     |     |        |        |        |      |      |
| HETATM10183 | H8 | PRP | 699 | 29.901 | 9.440  | 9.614  | 1.00 | 0.00 |
| H           |    |     |     |        |        |        |      |      |
| HETATM10184 | O1 | PRP | 700 | 25.548 | 8.111  | 21.551 | 1.00 | 0.00 |
| O           |    |     |     |        |        |        |      |      |
| HETATM10185 | H1 | PRP | 700 | 26.057 | 8.925  | 21.542 | 1.00 | 0.00 |
| H           |    |     |     |        |        |        |      |      |
| HETATM10186 | C1 | PRP | 700 | 25.517 | 7.472  | 22.845 | 1.00 | 0.00 |
| C           |    |     |     |        |        |        |      |      |
| HETATM10187 | H2 | PRP | 700 | 25.074 | 6.477  | 22.817 | 1.00 | 0.00 |
| H           |    |     |     |        |        |        |      |      |
| HETATM10188 | H3 | PRP | 700 | 26.550 | 7.356  | 23.174 | 1.00 | 0.00 |
| H           |    |     |     |        |        |        |      |      |
| HETATM10189 | C2 | PRP | 700 | 24.766 | 8.446  | 23.754 | 1.00 | 0.00 |
| C           |    |     |     |        |        |        |      |      |
| HETATM10190 | H4 | PRP | 700 | 23.870 | 8.745  | 23.210 | 1.00 | 0.00 |
| H           |    |     |     |        |        |        |      |      |
| HETATM10191 | O2 | PRP | 700 | 25.551 | 9.628  | 24.077 | 1.00 | 0.00 |
| O           |    |     |     |        |        |        |      |      |

|             |    |     |     |        |        |        |      |      |
|-------------|----|-----|-----|--------|--------|--------|------|------|
| HETATM10192 | H5 | PRP | 700 | 24.910 | 10.305 | 24.306 | 1.00 | 0.00 |
| H           |    |     |     |        |        |        |      |      |
| HETATM10193 | C3 | PRP | 700 | 24.449 | 7.791  | 25.114 | 1.00 | 0.00 |
| C           |    |     |     |        |        |        |      |      |
| HETATM10194 | H6 | PRP | 700 | 24.218 | 8.520  | 25.891 | 1.00 | 0.00 |
| H           |    |     |     |        |        |        |      |      |
| HETATM10195 | H7 | PRP | 700 | 23.596 | 7.112  | 25.114 | 1.00 | 0.00 |
| H           |    |     |     |        |        |        |      |      |
| HETATM10196 | H8 | PRP | 700 | 25.291 | 7.233  | 25.523 | 1.00 | 0.00 |
| H           |    |     |     |        |        |        |      |      |
| HETATM10197 | O1 | PRP | 701 | 22.113 | -1.413 | 25.668 | 1.00 | 0.00 |
| O           |    |     |     |        |        |        |      |      |
| HETATM10198 | H1 | PRP | 701 | 21.434 | -0.738 | 25.740 | 1.00 | 0.00 |
| H           |    |     |     |        |        |        |      |      |
| HETATM10199 | C1 | PRP | 701 | 23.319 | -0.689 | 25.341 | 1.00 | 0.00 |
| C           |    |     |     |        |        |        |      |      |
| HETATM10200 | H2 | PRP | 701 | 23.198 | -0.112 | 24.424 | 1.00 | 0.00 |
| H           |    |     |     |        |        |        |      |      |
| HETATM10201 | H3 | PRP | 701 | 23.554 | 0.074  | 26.084 | 1.00 | 0.00 |
| H           |    |     |     |        |        |        |      |      |
| HETATM10202 | C2 | PRP | 701 | 24.503 | -1.669 | 25.182 | 1.00 | 0.00 |
| C           |    |     |     |        |        |        |      |      |
| HETATM10203 | H4 | PRP | 701 | 25.292 | -1.234 | 24.569 | 1.00 | 0.00 |
| H           |    |     |     |        |        |        |      |      |
| HETATM10204 | O2 | PRP | 701 | 23.954 | -2.840 | 24.612 | 1.00 | 0.00 |
| O           |    |     |     |        |        |        |      |      |
| HETATM10205 | H5 | PRP | 701 | 23.076 | -2.902 | 24.998 | 1.00 | 0.00 |
| H           |    |     |     |        |        |        |      |      |
| HETATM10206 | C3 | PRP | 701 | 25.116 | -2.012 | 26.568 | 1.00 | 0.00 |
| C           |    |     |     |        |        |        |      |      |
| HETATM10207 | H6 | PRP | 701 | 24.318 | -2.288 | 27.258 | 1.00 | 0.00 |
| H           |    |     |     |        |        |        |      |      |
| HETATM10208 | H7 | PRP | 701 | 25.915 | -2.744 | 26.451 | 1.00 | 0.00 |
| H           |    |     |     |        |        |        |      |      |
| HETATM10209 | H8 | PRP | 701 | 25.664 | -1.131 | 26.900 | 1.00 | 0.00 |
| H           |    |     |     |        |        |        |      |      |
| HETATM10210 | O1 | PRP | 702 | 23.500 | 3.745  | 28.182 | 1.00 | 0.00 |
| O           |    |     |     |        |        |        |      |      |
| HETATM10211 | H1 | PRP | 702 | 24.355 | 4.178  | 28.131 | 1.00 | 0.00 |
| H           |    |     |     |        |        |        |      |      |
| HETATM10212 | C1 | PRP | 702 | 23.725 | 2.437  | 28.516 | 1.00 | 0.00 |
| C           |    |     |     |        |        |        |      |      |
| HETATM10213 | H2 | PRP | 702 | 24.491 | 1.995  | 27.879 | 1.00 | 0.00 |
| H           |    |     |     |        |        |        |      |      |
| HETATM10214 | H3 | PRP | 702 | 24.180 | 2.501  | 29.504 | 1.00 | 0.00 |
| H           |    |     |     |        |        |        |      |      |
| HETATM10215 | C2 | PRP | 702 | 22.479 | 1.502  | 28.537 | 1.00 | 0.00 |
| C           |    |     |     |        |        |        |      |      |
| HETATM10216 | H4 | PRP | 702 | 22.135 | 1.283  | 27.526 | 1.00 | 0.00 |
| H           |    |     |     |        |        |        |      |      |
| HETATM10217 | O2 | PRP | 702 | 21.438 | 2.249  | 29.246 | 1.00 | 0.00 |
| O           |    |     |     |        |        |        |      |      |
| HETATM10218 | H5 | PRP | 702 | 21.842 | 3.118  | 29.296 | 1.00 | 0.00 |
| H           |    |     |     |        |        |        |      |      |
| HETATM10219 | C3 | PRP | 702 | 22.925 | 0.232  | 29.216 | 1.00 | 0.00 |
| C           |    |     |     |        |        |        |      |      |



|             |    |     |     |        |        |        |      |      |
|-------------|----|-----|-----|--------|--------|--------|------|------|
| HETATM10220 | H6 | PRP | 702 | 23.006 | 0.377  | 30.294 | 1.00 | 0.00 |
| H           |    |     |     |        |        |        |      |      |
| HETATM10221 | H7 | PRP | 702 | 22.210 | -0.582 | 29.103 | 1.00 | 0.00 |
| H           |    |     |     |        |        |        |      |      |
| HETATM10222 | H8 | PRP | 702 | 23.859 | -0.130 | 28.788 | 1.00 | 0.00 |
| H           |    |     |     |        |        |        |      |      |
| HETATM10223 | O1 | PRP | 703 | 30.832 | 11.162 | 23.240 | 1.00 | 0.00 |
| O           |    |     |     |        |        |        |      |      |
| HETATM10224 | H1 | PRP | 703 | 31.460 | 11.384 | 23.932 | 1.00 | 0.00 |
| H           |    |     |     |        |        |        |      |      |
| HETATM10225 | C1 | PRP | 703 | 30.215 | 9.950  | 23.388 | 1.00 | 0.00 |
| C           |    |     |     |        |        |        |      |      |
| HETATM10226 | H2 | PRP | 703 | 29.539 | 9.765  | 22.554 | 1.00 | 0.00 |
| H           |    |     |     |        |        |        |      |      |
| HETATM10227 | H3 | PRP | 703 | 30.986 | 9.181  | 23.453 | 1.00 | 0.00 |
| H           |    |     |     |        |        |        |      |      |
| HETATM10228 | C2 | PRP | 703 | 29.341 | 9.860  | 24.649 | 1.00 | 0.00 |
| C           |    |     |     |        |        |        |      |      |
| HETATM10229 | H4 | PRP | 703 | 28.456 | 10.474 | 24.482 | 1.00 | 0.00 |
| H           |    |     |     |        |        |        |      |      |
| HETATM10230 | O2 | PRP | 703 | 30.113 | 10.309 | 25.773 | 1.00 | 0.00 |
| O           |    |     |     |        |        |        |      |      |
| HETATM10231 | H5 | PRP | 703 | 29.822 | 11.220 | 25.854 | 1.00 | 0.00 |
| H           |    |     |     |        |        |        |      |      |
| HETATM10232 | C3 | PRP | 703 | 28.924 | 8.403  | 24.995 | 1.00 | 0.00 |
| C           |    |     |     |        |        |        |      |      |
| HETATM10233 | H6 | PRP | 703 | 29.825 | 7.790  | 24.952 | 1.00 | 0.00 |
| H           |    |     |     |        |        |        |      |      |
| HETATM10234 | H7 | PRP | 703 | 28.553 | 8.289  | 26.013 | 1.00 | 0.00 |
| H           |    |     |     |        |        |        |      |      |
| HETATM10235 | H8 | PRP | 703 | 28.145 | 8.100  | 24.295 | 1.00 | 0.00 |
| H           |    |     |     |        |        |        |      |      |
| HETATM10236 | O1 | PRP | 704 | 31.974 | 15.976 | 22.731 | 1.00 | 0.00 |
| O           |    |     |     |        |        |        |      |      |
| HETATM10237 | H1 | PRP | 704 | 31.814 | 15.768 | 23.655 | 1.00 | 0.00 |
| H           |    |     |     |        |        |        |      |      |
| HETATM10238 | C1 | PRP | 704 | 31.950 | 14.679 | 22.119 | 1.00 | 0.00 |
| C           |    |     |     |        |        |        |      |      |
| HETATM10239 | H2 | PRP | 704 | 32.969 | 14.320 | 21.973 | 1.00 | 0.00 |
| H           |    |     |     |        |        |        |      |      |
| HETATM10240 | H3 | PRP | 704 | 31.439 | 14.026 | 22.826 | 1.00 | 0.00 |
| H           |    |     |     |        |        |        |      |      |
| HETATM10241 | C2 | PRP | 704 | 31.243 | 14.670 | 20.774 | 1.00 | 0.00 |
| C           |    |     |     |        |        |        |      |      |
| HETATM10242 | H4 | PRP | 704 | 31.522 | 15.467 | 20.086 | 1.00 | 0.00 |
| H           |    |     |     |        |        |        |      |      |
| HETATM10243 | O2 | PRP | 704 | 29.869 | 14.887 | 21.003 | 1.00 | 0.00 |
| O           |    |     |     |        |        |        |      |      |
| HETATM10244 | H5 | PRP | 704 | 29.732 | 15.687 | 21.517 | 1.00 | 0.00 |
| H           |    |     |     |        |        |        |      |      |
| HETATM10245 | C3 | PRP | 704 | 31.257 | 13.306 | 20.012 | 1.00 | 0.00 |
| C           |    |     |     |        |        |        |      |      |
| HETATM10246 | H6 | PRP | 704 | 30.750 | 12.653 | 20.722 | 1.00 | 0.00 |
| H           |    |     |     |        |        |        |      |      |
| HETATM10247 | H7 | PRP | 704 | 30.646 | 13.394 | 19.114 | 1.00 | 0.00 |
| H           |    |     |     |        |        |        |      |      |

|             |    |     |     |        |        |        |      |      |
|-------------|----|-----|-----|--------|--------|--------|------|------|
| HETATM10248 | H8 | PRP | 704 | 32.243 | 12.956 | 19.705 | 1.00 | 0.00 |
| H           |    |     |     |        |        |        |      |      |
| HETATM10249 | O1 | PRP | 705 | 35.647 | 10.896 | 26.452 | 1.00 | 0.00 |
| O           |    |     |     |        |        |        |      |      |
| HETATM10250 | H1 | PRP | 705 | 36.001 | 10.635 | 25.598 | 1.00 | 0.00 |
| H           |    |     |     |        |        |        |      |      |
| HETATM10251 | C1 | PRP | 705 | 34.269 | 11.197 | 26.359 | 1.00 | 0.00 |
| C           |    |     |     |        |        |        |      |      |
| HETATM10252 | H2 | PRP | 705 | 33.777 | 10.300 | 25.984 | 1.00 | 0.00 |
| H           |    |     |     |        |        |        |      |      |
| HETATM10253 | H3 | PRP | 705 | 34.010 | 11.450 | 27.388 | 1.00 | 0.00 |
| H           |    |     |     |        |        |        |      |      |
| HETATM10254 | C2 | PRP | 705 | 33.941 | 12.401 | 25.488 | 1.00 | 0.00 |
| C           |    |     |     |        |        |        |      |      |
| HETATM10255 | H4 | PRP | 705 | 33.011 | 12.843 | 25.845 | 1.00 | 0.00 |
| H           |    |     |     |        |        |        |      |      |
| HETATM10256 | O2 | PRP | 705 | 33.592 | 11.811 | 24.268 | 1.00 | 0.00 |
| O           |    |     |     |        |        |        |      |      |
| HETATM10257 | H5 | PRP | 705 | 34.372 | 11.432 | 23.856 | 1.00 | 0.00 |
| H           |    |     |     |        |        |        |      |      |
| HETATM10258 | C3 | PRP | 705 | 35.019 | 13.425 | 25.176 | 1.00 | 0.00 |
| C           |    |     |     |        |        |        |      |      |
| HETATM10259 | H6 | PRP | 705 | 34.587 | 14.096 | 24.434 | 1.00 | 0.00 |
| H           |    |     |     |        |        |        |      |      |
| HETATM10260 | H7 | PRP | 705 | 35.275 | 13.927 | 26.109 | 1.00 | 0.00 |
| H           |    |     |     |        |        |        |      |      |
| HETATM10261 | H8 | PRP | 705 | 35.873 | 12.877 | 24.777 | 1.00 | 0.00 |
| H           |    |     |     |        |        |        |      |      |
| HETATM10262 | O1 | PRP | 706 | 33.614 | 26.269 | 23.416 | 1.00 | 0.00 |
| O           |    |     |     |        |        |        |      |      |
| HETATM10263 | H1 | PRP | 706 | 34.314 | 26.447 | 22.783 | 1.00 | 0.00 |
| H           |    |     |     |        |        |        |      |      |
| HETATM10264 | C1 | PRP | 706 | 32.698 | 27.317 | 23.163 | 1.00 | 0.00 |
| C           |    |     |     |        |        |        |      |      |
| HETATM10265 | H2 | PRP | 706 | 32.154 | 26.988 | 22.278 | 1.00 | 0.00 |
| H           |    |     |     |        |        |        |      |      |
| HETATM10266 | H3 | PRP | 706 | 31.990 | 27.465 | 23.979 | 1.00 | 0.00 |
| H           |    |     |     |        |        |        |      |      |
| HETATM10267 | C2 | PRP | 706 | 33.578 | 28.536 | 22.854 | 1.00 | 0.00 |
| C           |    |     |     |        |        |        |      |      |
| HETATM10268 | H4 | PRP | 706 | 32.964 | 29.293 | 22.365 | 1.00 | 0.00 |
| H           |    |     |     |        |        |        |      |      |
| HETATM10269 | O2 | PRP | 706 | 34.562 | 28.227 | 21.862 | 1.00 | 0.00 |
| O           |    |     |     |        |        |        |      |      |
| HETATM10270 | H5 | PRP | 706 | 35.182 | 28.954 | 21.771 | 1.00 | 0.00 |
| H           |    |     |     |        |        |        |      |      |
| HETATM10271 | C3 | PRP | 706 | 34.135 | 29.046 | 24.191 | 1.00 | 0.00 |
| C           |    |     |     |        |        |        |      |      |
| HETATM10272 | H6 | PRP | 706 | 34.637 | 28.253 | 24.746 | 1.00 | 0.00 |
| H           |    |     |     |        |        |        |      |      |
| HETATM10273 | H7 | PRP | 706 | 34.923 | 29.763 | 23.961 | 1.00 | 0.00 |
| H           |    |     |     |        |        |        |      |      |
| HETATM10274 | H8 | PRP | 706 | 33.358 | 29.541 | 24.773 | 1.00 | 0.00 |
| H           |    |     |     |        |        |        |      |      |
| HETATM10275 | O1 | PRP | 707 | 21.110 | 2.646  | 32.104 | 1.00 | 0.00 |
| O           |    |     |     |        |        |        |      |      |

|             |    |     |     |        |        |        |      |      |
|-------------|----|-----|-----|--------|--------|--------|------|------|
| HETATM10276 | H1 | PRP | 707 | 20.716 | 2.402  | 31.263 | 1.00 | 0.00 |
| H           |    |     |     |        |        |        |      |      |
| HETATM10277 | C1 | PRP | 707 | 20.602 | 3.910  | 32.501 | 1.00 | 0.00 |
| C           |    |     |     |        |        |        |      |      |
| HETATM10278 | H2 | PRP | 707 | 19.515 | 3.862  | 32.561 | 1.00 | 0.00 |
| H           |    |     |     |        |        |        |      |      |
| HETATM10279 | H3 | PRP | 707 | 20.905 | 4.168  | 33.515 | 1.00 | 0.00 |
| H           |    |     |     |        |        |        |      |      |
| HETATM10280 | C2 | PRP | 707 | 21.165 | 5.106  | 31.649 | 1.00 | 0.00 |
| C           |    |     |     |        |        |        |      |      |
| HETATM10281 | H4 | PRP | 707 | 20.716 | 5.994  | 32.095 | 1.00 | 0.00 |
| H           |    |     |     |        |        |        |      |      |
| HETATM10282 | O2 | PRP | 707 | 20.647 | 5.131  | 30.378 | 1.00 | 0.00 |
| O           |    |     |     |        |        |        |      |      |
| HETATM10283 | H5 | PRP | 707 | 21.017 | 5.824  | 29.825 | 1.00 | 0.00 |
| H           |    |     |     |        |        |        |      |      |
| HETATM10284 | C3 | PRP | 707 | 22.710 | 5.207  | 31.625 | 1.00 | 0.00 |
| C           |    |     |     |        |        |        |      |      |
| HETATM10285 | H6 | PRP | 707 | 22.942 | 5.212  | 32.689 | 1.00 | 0.00 |
| H           |    |     |     |        |        |        |      |      |
| HETATM10286 | H7 | PRP | 707 | 23.249 | 4.320  | 31.294 | 1.00 | 0.00 |
| H           |    |     |     |        |        |        |      |      |
| HETATM10287 | H8 | PRP | 707 | 23.081 | 6.084  | 31.093 | 1.00 | 0.00 |
| H           |    |     |     |        |        |        |      |      |
| HETATM10288 | O1 | PRP | 708 | 21.060 | -0.560 | 7.478  | 1.00 | 0.00 |
| O           |    |     |     |        |        |        |      |      |
| HETATM10289 | H1 | PRP | 708 | 20.895 | -0.049 | 6.683  | 1.00 | 0.00 |
| H           |    |     |     |        |        |        |      |      |
| HETATM10290 | C1 | PRP | 708 | 21.537 | 0.328  | 8.534  | 1.00 | 0.00 |
| C           |    |     |     |        |        |        |      |      |
| HETATM10291 | H2 | PRP | 708 | 21.896 | -0.265 | 9.375  | 1.00 | 0.00 |
| H           |    |     |     |        |        |        |      |      |
| HETATM10292 | H3 | PRP | 708 | 22.377 | 0.866  | 8.095  | 1.00 | 0.00 |
| H           |    |     |     |        |        |        |      |      |
| HETATM10293 | C2 | PRP | 708 | 20.373 | 1.283  | 8.927  | 1.00 | 0.00 |
| C           |    |     |     |        |        |        |      |      |
| HETATM10294 | H4 | PRP | 708 | 20.626 | 1.751  | 9.878  | 1.00 | 0.00 |
| H           |    |     |     |        |        |        |      |      |
| HETATM10295 | O2 | PRP | 708 | 19.139 | 0.669  | 9.112  | 1.00 | 0.00 |
| O           |    |     |     |        |        |        |      |      |
| HETATM10296 | H5 | PRP | 708 | 18.650 | 0.992  | 9.873  | 1.00 | 0.00 |
| H           |    |     |     |        |        |        |      |      |
| HETATM10297 | C3 | PRP | 708 | 20.164 | 2.435  | 7.850  | 1.00 | 0.00 |
| C           |    |     |     |        |        |        |      |      |
| HETATM10298 | H6 | PRP | 708 | 21.008 | 3.121  | 7.922  | 1.00 | 0.00 |
| H           |    |     |     |        |        |        |      |      |
| HETATM10299 | H7 | PRP | 708 | 19.985 | 1.915  | 6.909  | 1.00 | 0.00 |
| H           |    |     |     |        |        |        |      |      |
| HETATM10300 | H8 | PRP | 708 | 19.224 | 2.940  | 8.075  | 1.00 | 0.00 |
| H           |    |     |     |        |        |        |      |      |
| HETATM10301 | O1 | PRP | 709 | 20.901 | 5.663  | 15.917 | 1.00 | 0.00 |
| O           |    |     |     |        |        |        |      |      |
| HETATM10302 | H1 | PRP | 709 | 20.087 | 5.944  | 15.491 | 1.00 | 0.00 |
| H           |    |     |     |        |        |        |      |      |
| HETATM10303 | C1 | PRP | 709 | 20.528 | 4.756  | 16.915 | 1.00 | 0.00 |
| C           |    |     |     |        |        |        |      |      |

|             |    |     |     |        |        |        |      |      |
|-------------|----|-----|-----|--------|--------|--------|------|------|
| HETATM10304 | H2 | PRP | 709 | 20.228 | 3.791  | 16.507 | 1.00 | 0.00 |
| H           |    |     |     |        |        |        |      |      |
| HETATM10305 | H3 | PRP | 709 | 21.432 | 4.644  | 17.515 | 1.00 | 0.00 |
| H           |    |     |     |        |        |        |      |      |
| HETATM10306 | C2 | PRP | 709 | 19.267 | 5.373  | 17.663 | 1.00 | 0.00 |
| C           |    |     |     |        |        |        |      |      |
| HETATM10307 | H4 | PRP | 709 | 18.853 | 4.718  | 18.429 | 1.00 | 0.00 |
| H           |    |     |     |        |        |        |      |      |
| HETATM10308 | O2 | PRP | 709 | 18.269 | 5.586  | 16.680 | 1.00 | 0.00 |
| O           |    |     |     |        |        |        |      |      |
| HETATM10309 | H5 | PRP | 709 | 17.656 | 4.859  | 16.545 | 1.00 | 0.00 |
| H           |    |     |     |        |        |        |      |      |
| HETATM10310 | C3 | PRP | 709 | 19.684 | 6.651  | 18.351 | 1.00 | 0.00 |
| C           |    |     |     |        |        |        |      |      |
| HETATM10311 | H6 | PRP | 709 | 20.640 | 6.410  | 18.816 | 1.00 | 0.00 |
| H           |    |     |     |        |        |        |      |      |
| HETATM10312 | H7 | PRP | 709 | 19.836 | 7.484  | 17.665 | 1.00 | 0.00 |
| H           |    |     |     |        |        |        |      |      |
| HETATM10313 | H8 | PRP | 709 | 18.866 | 6.779  | 19.059 | 1.00 | 0.00 |
| H           |    |     |     |        |        |        |      |      |
| HETATM10314 | O1 | PRP | 710 | 35.506 | 9.926  | 23.141 | 1.00 | 0.00 |
| O           |    |     |     |        |        |        |      |      |
| HETATM10315 | H1 | PRP | 710 | 36.313 | 9.962  | 23.660 | 1.00 | 0.00 |
| H           |    |     |     |        |        |        |      |      |
| HETATM10316 | C1 | PRP | 710 | 35.697 | 9.609  | 21.746 | 1.00 | 0.00 |
| C           |    |     |     |        |        |        |      |      |
| HETATM10317 | H2 | PRP | 710 | 36.241 | 8.667  | 21.683 | 1.00 | 0.00 |
| H           |    |     |     |        |        |        |      |      |
| HETATM10318 | H3 | PRP | 710 | 34.791 | 9.278  | 21.238 | 1.00 | 0.00 |
| H           |    |     |     |        |        |        |      |      |
| HETATM10319 | C2 | PRP | 710 | 36.288 | 10.690 | 20.849 | 1.00 | 0.00 |
| C           |    |     |     |        |        |        |      |      |
| HETATM10320 | H4 | PRP | 710 | 36.053 | 10.479 | 19.806 | 1.00 | 0.00 |
| H           |    |     |     |        |        |        |      |      |
| HETATM10321 | O2 | PRP | 710 | 37.771 | 10.649 | 21.093 | 1.00 | 0.00 |
| O           |    |     |     |        |        |        |      |      |
| HETATM10322 | H5 | PRP | 710 | 38.136 | 9.795  | 20.851 | 1.00 | 0.00 |
| H           |    |     |     |        |        |        |      |      |
| HETATM10323 | C3 | PRP | 710 | 35.895 | 12.085 | 21.191 | 1.00 | 0.00 |
| C           |    |     |     |        |        |        |      |      |
| HETATM10324 | H6 | PRP | 710 | 36.406 | 12.828 | 20.578 | 1.00 | 0.00 |
| H           |    |     |     |        |        |        |      |      |
| HETATM10325 | H7 | PRP | 710 | 34.832 | 12.192 | 20.976 | 1.00 | 0.00 |
| H           |    |     |     |        |        |        |      |      |
| HETATM10326 | H8 | PRP | 710 | 36.125 | 12.373 | 22.217 | 1.00 | 0.00 |
| H           |    |     |     |        |        |        |      |      |
| HETATM10327 | O1 | PRP | 711 | 40.495 | 18.196 | 15.584 | 1.00 | 0.00 |
| O           |    |     |     |        |        |        |      |      |
| HETATM10328 | H1 | PRP | 711 | 39.772 | 17.785 | 15.106 | 1.00 | 0.00 |
| H           |    |     |     |        |        |        |      |      |
| HETATM10329 | C1 | PRP | 711 | 41.747 | 17.599 | 15.539 | 1.00 | 0.00 |
| C           |    |     |     |        |        |        |      |      |
| HETATM10330 | H2 | PRP | 711 | 41.958 | 17.070 | 14.610 | 1.00 | 0.00 |
| H           |    |     |     |        |        |        |      |      |
| HETATM10331 | H3 | PRP | 711 | 42.464 | 18.405 | 15.697 | 1.00 | 0.00 |
| H           |    |     |     |        |        |        |      |      |

|             |    |     |     |        |        |        |      |      |
|-------------|----|-----|-----|--------|--------|--------|------|------|
| HETATM10332 | C2 | PRP | 711 | 41.828 | 16.620 | 16.655 | 1.00 | 0.00 |
| C           |    |     |     |        |        |        |      |      |
| HETATM10333 | H4 | PRP | 711 | 41.046 | 15.862 | 16.603 | 1.00 | 0.00 |
| H           |    |     |     |        |        |        |      |      |
| HETATM10334 | O2 | PRP | 711 | 41.685 | 17.231 | 17.870 | 1.00 | 0.00 |
| O           |    |     |     |        |        |        |      |      |
| HETATM10335 | H5 | PRP | 711 | 40.896 | 17.772 | 17.784 | 1.00 | 0.00 |
| H           |    |     |     |        |        |        |      |      |
| HETATM10336 | C3 | PRP | 711 | 43.271 | 16.014 | 16.596 | 1.00 | 0.00 |
| C           |    |     |     |        |        |        |      |      |
| HETATM10337 | H6 | PRP | 711 | 43.293 | 15.064 | 17.130 | 1.00 | 0.00 |
| H           |    |     |     |        |        |        |      |      |
| HETATM10338 | H7 | PRP | 711 | 43.601 | 15.902 | 15.563 | 1.00 | 0.00 |
| H           |    |     |     |        |        |        |      |      |
| HETATM10339 | H8 | PRP | 711 | 43.992 | 16.712 | 17.021 | 1.00 | 0.00 |
| H           |    |     |     |        |        |        |      |      |
| HETATM10340 | O1 | PRP | 712 | 45.191 | 11.983 | 21.808 | 1.00 | 0.00 |
| O           |    |     |     |        |        |        |      |      |
| HETATM10341 | H1 | PRP | 712 | 44.781 | 12.294 | 20.998 | 1.00 | 0.00 |
| H           |    |     |     |        |        |        |      |      |
| HETATM10342 | C1 | PRP | 712 | 44.273 | 11.195 | 22.504 | 1.00 | 0.00 |
| C           |    |     |     |        |        |        |      |      |
| HETATM10343 | H2 | PRP | 712 | 44.703 | 10.807 | 23.427 | 1.00 | 0.00 |
| H           |    |     |     |        |        |        |      |      |
| HETATM10344 | H3 | PRP | 712 | 43.376 | 11.758 | 22.761 | 1.00 | 0.00 |
| H           |    |     |     |        |        |        |      |      |
| HETATM10345 | C2 | PRP | 712 | 43.919 | 10.075 | 21.591 | 1.00 | 0.00 |
| C           |    |     |     |        |        |        |      |      |
| HETATM10346 | H4 | PRP | 712 | 44.760 | 9.388  | 21.495 | 1.00 | 0.00 |
| H           |    |     |     |        |        |        |      |      |
| HETATM10347 | O2 | PRP | 712 | 43.552 | 10.517 | 20.269 | 1.00 | 0.00 |
| O           |    |     |     |        |        |        |      |      |
| HETATM10348 | H5 | PRP | 712 | 43.725 | 9.835  | 19.616 | 1.00 | 0.00 |
| H           |    |     |     |        |        |        |      |      |
| HETATM10349 | C3 | PRP | 712 | 42.811 | 9.317  | 22.170 | 1.00 | 0.00 |
| C           |    |     |     |        |        |        |      |      |
| HETATM10350 | H6 | PRP | 712 | 42.516 | 8.496  | 21.518 | 1.00 | 0.00 |
| H           |    |     |     |        |        |        |      |      |
| HETATM10351 | H7 | PRP | 712 | 43.195 | 8.949  | 23.122 | 1.00 | 0.00 |
| H           |    |     |     |        |        |        |      |      |
| HETATM10352 | H8 | PRP | 712 | 41.960 | 9.999  | 22.183 | 1.00 | 0.00 |
| H           |    |     |     |        |        |        |      |      |
| HETATM10353 | O1 | PRP | 713 | 37.958 | 22.384 | 20.333 | 1.00 | 0.00 |
| O           |    |     |     |        |        |        |      |      |
| HETATM10354 | H1 | PRP | 713 | 38.429 | 22.611 | 21.138 | 1.00 | 0.00 |
| H           |    |     |     |        |        |        |      |      |
| HETATM10355 | C1 | PRP | 713 | 36.642 | 21.862 | 20.519 | 1.00 | 0.00 |
| C           |    |     |     |        |        |        |      |      |
| HETATM10356 | H2 | PRP | 713 | 36.741 | 20.780 | 20.613 | 1.00 | 0.00 |
| H           |    |     |     |        |        |        |      |      |
| HETATM10357 | H3 | PRP | 713 | 36.239 | 22.237 | 21.460 | 1.00 | 0.00 |
| H           |    |     |     |        |        |        |      |      |
| HETATM10358 | C2 | PRP | 713 | 35.672 | 22.198 | 19.383 | 1.00 | 0.00 |
| C           |    |     |     |        |        |        |      |      |
| HETATM10359 | H4 | PRP | 713 | 34.679 | 21.900 | 19.720 | 1.00 | 0.00 |
| H           |    |     |     |        |        |        |      |      |

|             |    |     |     |        |        |        |      |      |
|-------------|----|-----|-----|--------|--------|--------|------|------|
| HETATM10360 | O2 | PRP | 713 | 35.832 | 21.424 | 18.211 | 1.00 | 0.00 |
| O           |    |     |     |        |        |        |      |      |
| HETATM10361 | H5 | PRP | 713 | 36.184 | 20.562 | 18.443 | 1.00 | 0.00 |
| H           |    |     |     |        |        |        |      |      |
| HETATM10362 | C3 | PRP | 713 | 35.643 | 23.788 | 19.171 | 1.00 | 0.00 |
| C           |    |     |     |        |        |        |      |      |
| HETATM10363 | H6 | PRP | 713 | 34.832 | 24.251 | 18.607 | 1.00 | 0.00 |
| H           |    |     |     |        |        |        |      |      |
| HETATM10364 | H7 | PRP | 713 | 35.638 | 24.209 | 20.176 | 1.00 | 0.00 |
| H           |    |     |     |        |        |        |      |      |
| HETATM10365 | H8 | PRP | 713 | 36.586 | 23.985 | 18.662 | 1.00 | 0.00 |
| H           |    |     |     |        |        |        |      |      |
| HETATM10366 | O1 | PRP | 714 | 23.065 | 7.378  | 16.663 | 1.00 | 0.00 |
| O           |    |     |     |        |        |        |      |      |
| HETATM10367 | H1 | PRP | 714 | 22.524 | 6.642  | 16.367 | 1.00 | 0.00 |
| H           |    |     |     |        |        |        |      |      |
| HETATM10368 | C1 | PRP | 714 | 23.950 | 6.945  | 17.677 | 1.00 | 0.00 |
| C           |    |     |     |        |        |        |      |      |
| HETATM10369 | H2 | PRP | 714 | 23.311 | 6.749  | 18.538 | 1.00 | 0.00 |
| H           |    |     |     |        |        |        |      |      |
| HETATM10370 | H3 | PRP | 714 | 24.456 | 6.022  | 17.393 | 1.00 | 0.00 |
| H           |    |     |     |        |        |        |      |      |
| HETATM10371 | C2 | PRP | 714 | 24.949 | 8.004  | 18.197 | 1.00 | 0.00 |
| C           |    |     |     |        |        |        |      |      |
| HETATM10372 | H4 | PRP | 714 | 25.288 | 7.712  | 19.191 | 1.00 | 0.00 |
| H           |    |     |     |        |        |        |      |      |
| HETATM10373 | O2 | PRP | 714 | 24.363 | 9.328  | 18.194 | 1.00 | 0.00 |
| O           |    |     |     |        |        |        |      |      |
| HETATM10374 | H5 | PRP | 714 | 23.484 | 9.194  | 17.833 | 1.00 | 0.00 |
| H           |    |     |     |        |        |        |      |      |
| HETATM10375 | C3 | PRP | 714 | 26.177 | 8.089  | 17.246 | 1.00 | 0.00 |
| C           |    |     |     |        |        |        |      |      |
| HETATM10376 | H6 | PRP | 714 | 25.780 | 8.527  | 16.331 | 1.00 | 0.00 |
| H           |    |     |     |        |        |        |      |      |
| HETATM10377 | H7 | PRP | 714 | 27.012 | 8.618  | 17.707 | 1.00 | 0.00 |
| H           |    |     |     |        |        |        |      |      |
| HETATM10378 | H8 | PRP | 714 | 26.565 | 7.077  | 17.125 | 1.00 | 0.00 |
| H           |    |     |     |        |        |        |      |      |
| HETATM10379 | O1 | PRP | 715 | 36.783 | 6.179  | 23.308 | 1.00 | 0.00 |
| O           |    |     |     |        |        |        |      |      |
| HETATM10380 | H1 | PRP | 715 | 37.251 | 5.597  | 23.911 | 1.00 | 0.00 |
| H           |    |     |     |        |        |        |      |      |
| HETATM10381 | C1 | PRP | 715 | 35.428 | 5.833  | 23.129 | 1.00 | 0.00 |
| C           |    |     |     |        |        |        |      |      |
| HETATM10382 | H2 | PRP | 715 | 35.067 | 6.081  | 22.131 | 1.00 | 0.00 |
| H           |    |     |     |        |        |        |      |      |
| HETATM10383 | H3 | PRP | 715 | 35.251 | 4.785  | 23.371 | 1.00 | 0.00 |
| H           |    |     |     |        |        |        |      |      |
| HETATM10384 | C2 | PRP | 715 | 34.650 | 6.697  | 24.207 | 1.00 | 0.00 |
| C           |    |     |     |        |        |        |      |      |
| HETATM10385 | H4 | PRP | 715 | 35.019 | 7.722  | 24.211 | 1.00 | 0.00 |
| H           |    |     |     |        |        |        |      |      |
| HETATM10386 | O2 | PRP | 715 | 34.779 | 6.048  | 25.429 | 1.00 | 0.00 |
| O           |    |     |     |        |        |        |      |      |
| HETATM10387 | H5 | PRP | 715 | 35.337 | 6.568  | 26.012 | 1.00 | 0.00 |
| H           |    |     |     |        |        |        |      |      |

|             |    |     |     |        |        |        |      |      |
|-------------|----|-----|-----|--------|--------|--------|------|------|
| HETATM10388 | C3 | PRP | 715 | 33.074 | 6.586  | 23.969 | 1.00 | 0.00 |
| C           |    |     |     |        |        |        |      |      |
| HETATM10389 | H6 | PRP | 715 | 32.664 | 5.631  | 24.295 | 1.00 | 0.00 |
| H           |    |     |     |        |        |        |      |      |
| HETATM10390 | H7 | PRP | 715 | 32.640 | 7.357  | 24.607 | 1.00 | 0.00 |
| H           |    |     |     |        |        |        |      |      |
| HETATM10391 | H8 | PRP | 715 | 32.934 | 6.885  | 22.930 | 1.00 | 0.00 |
| H           |    |     |     |        |        |        |      |      |
| HETATM10392 | O1 | PRP | 716 | 32.132 | 5.811  | 19.196 | 1.00 | 0.00 |
| O           |    |     |     |        |        |        |      |      |
| HETATM10393 | H1 | PRP | 716 | 31.852 | 4.893  | 19.198 | 1.00 | 0.00 |
| H           |    |     |     |        |        |        |      |      |
| HETATM10394 | C1 | PRP | 716 | 33.432 | 5.992  | 19.760 | 1.00 | 0.00 |
| C           |    |     |     |        |        |        |      |      |
| HETATM10395 | H2 | PRP | 716 | 33.269 | 6.656  | 20.609 | 1.00 | 0.00 |
| H           |    |     |     |        |        |        |      |      |
| HETATM10396 | H3 | PRP | 716 | 33.969 | 5.110  | 20.110 | 1.00 | 0.00 |
| H           |    |     |     |        |        |        |      |      |
| HETATM10397 | C2 | PRP | 716 | 34.378 | 6.716  | 18.789 | 1.00 | 0.00 |
| C           |    |     |     |        |        |        |      |      |
| HETATM10398 | H4 | PRP | 716 | 33.993 | 7.722  | 18.624 | 1.00 | 0.00 |
| H           |    |     |     |        |        |        |      |      |
| HETATM10399 | O2 | PRP | 716 | 34.183 | 6.101  | 17.528 | 1.00 | 0.00 |
| O           |    |     |     |        |        |        |      |      |
| HETATM10400 | H5 | PRP | 716 | 33.249 | 5.909  | 17.416 | 1.00 | 0.00 |
| H           |    |     |     |        |        |        |      |      |
| HETATM10401 | C3 | PRP | 716 | 35.855 | 6.837  | 19.223 | 1.00 | 0.00 |
| C           |    |     |     |        |        |        |      |      |
| HETATM10402 | H6 | PRP | 716 | 36.413 | 7.421  | 18.491 | 1.00 | 0.00 |
| H           |    |     |     |        |        |        |      |      |
| HETATM10403 | H7 | PRP | 716 | 35.910 | 7.281  | 20.217 | 1.00 | 0.00 |
| H           |    |     |     |        |        |        |      |      |
| HETATM10404 | H8 | PRP | 716 | 36.314 | 5.848  | 19.220 | 1.00 | 0.00 |
| H           |    |     |     |        |        |        |      |      |
| HETATM10405 | O1 | PRP | 717 | 39.544 | 18.753 | 23.156 | 1.00 | 0.00 |
| O           |    |     |     |        |        |        |      |      |
| HETATM10406 | H1 | PRP | 717 | 39.906 | 18.393 | 23.969 | 1.00 | 0.00 |
| H           |    |     |     |        |        |        |      |      |
| HETATM10407 | C1 | PRP | 717 | 40.301 | 19.930 | 22.772 | 1.00 | 0.00 |
| C           |    |     |     |        |        |        |      |      |
| HETATM10408 | H2 | PRP | 717 | 39.850 | 20.454 | 21.929 | 1.00 | 0.00 |
| H           |    |     |     |        |        |        |      |      |
| HETATM10409 | H3 | PRP | 717 | 40.362 | 20.678 | 23.562 | 1.00 | 0.00 |
| H           |    |     |     |        |        |        |      |      |
| HETATM10410 | C2 | PRP | 717 | 41.618 | 19.421 | 22.212 | 1.00 | 0.00 |
| C           |    |     |     |        |        |        |      |      |
| HETATM10411 | H4 | PRP | 717 | 42.239 | 20.233 | 21.833 | 1.00 | 0.00 |
| H           |    |     |     |        |        |        |      |      |
| HETATM10412 | O2 | PRP | 717 | 41.415 | 18.605 | 21.075 | 1.00 | 0.00 |
| O           |    |     |     |        |        |        |      |      |
| HETATM10413 | H5 | PRP | 717 | 40.773 | 17.924 | 21.289 | 1.00 | 0.00 |
| H           |    |     |     |        |        |        |      |      |
| HETATM10414 | C3 | PRP | 717 | 42.327 | 18.537 | 23.190 | 1.00 | 0.00 |
| C           |    |     |     |        |        |        |      |      |
| HETATM10415 | H6 | PRP | 717 | 42.160 | 17.478 | 22.994 | 1.00 | 0.00 |
| H           |    |     |     |        |        |        |      |      |

|             |    |     |     |        |        |        |      |      |
|-------------|----|-----|-----|--------|--------|--------|------|------|
| HETATM10416 | H7 | PRP | 717 | 43.398 | 18.677 | 23.049 | 1.00 | 0.00 |
| H           |    |     |     |        |        |        |      |      |
| HETATM10417 | H8 | PRP | 717 | 42.023 | 18.764 | 24.212 | 1.00 | 0.00 |
| H           |    |     |     |        |        |        |      |      |
| HETATM10418 | O1 | PRP | 718 | 44.623 | 12.790 | 31.176 | 1.00 | 0.00 |
| O           |    |     |     |        |        |        |      |      |
| HETATM10419 | H1 | PRP | 718 | 45.282 | 13.463 | 30.991 | 1.00 | 0.00 |
| H           |    |     |     |        |        |        |      |      |
| HETATM10420 | C1 | PRP | 718 | 44.915 | 11.987 | 32.256 | 1.00 | 0.00 |
| C           |    |     |     |        |        |        |      |      |
| HETATM10421 | H2 | PRP | 718 | 45.566 | 11.183 | 31.913 | 1.00 | 0.00 |
| H           |    |     |     |        |        |        |      |      |
| HETATM10422 | H3 | PRP | 718 | 45.419 | 12.644 | 32.966 | 1.00 | 0.00 |
| H           |    |     |     |        |        |        |      |      |
| HETATM10423 | C2 | PRP | 718 | 43.713 | 11.243 | 32.801 | 1.00 | 0.00 |
| C           |    |     |     |        |        |        |      |      |
| HETATM10424 | H4 | PRP | 718 | 43.291 | 10.564 | 32.060 | 1.00 | 0.00 |
| H           |    |     |     |        |        |        |      |      |
| HETATM10425 | O2 | PRP | 718 | 42.768 | 12.200 | 33.304 | 1.00 | 0.00 |
| O           |    |     |     |        |        |        |      |      |
| HETATM10426 | H5 | PRP | 718 | 42.838 | 13.005 | 32.786 | 1.00 | 0.00 |
| H           |    |     |     |        |        |        |      |      |
| HETATM10427 | C3 | PRP | 718 | 44.219 | 10.504 | 33.990 | 1.00 | 0.00 |
| C           |    |     |     |        |        |        |      |      |
| HETATM10428 | H6 | PRP | 718 | 45.006 | 11.027 | 34.534 | 1.00 | 0.00 |
| H           |    |     |     |        |        |        |      |      |
| HETATM10429 | H7 | PRP | 718 | 43.434 | 10.090 | 34.623 | 1.00 | 0.00 |
| H           |    |     |     |        |        |        |      |      |
| HETATM10430 | H8 | PRP | 718 | 44.741 | 9.624  | 33.614 | 1.00 | 0.00 |
| H           |    |     |     |        |        |        |      |      |
| HETATM10431 | O1 | PRP | 719 | 38.256 | 3.302  | 19.108 | 1.00 | 0.00 |
| O           |    |     |     |        |        |        |      |      |
| HETATM10432 | H1 | PRP | 719 | 37.708 | 2.541  | 18.905 | 1.00 | 0.00 |
| H           |    |     |     |        |        |        |      |      |
| HETATM10433 | C1 | PRP | 719 | 38.149 | 3.483  | 20.477 | 1.00 | 0.00 |
| C           |    |     |     |        |        |        |      |      |
| HETATM10434 | H2 | PRP | 719 | 39.009 | 4.034  | 20.860 | 1.00 | 0.00 |
| H           |    |     |     |        |        |        |      |      |
| HETATM10435 | H3 | PRP | 719 | 37.308 | 4.074  | 20.840 | 1.00 | 0.00 |
| H           |    |     |     |        |        |        |      |      |
| HETATM10436 | C2 | PRP | 719 | 37.897 | 2.136  | 21.154 | 1.00 | 0.00 |
| C           |    |     |     |        |        |        |      |      |
| HETATM10437 | H4 | PRP | 719 | 38.555 | 1.325  | 20.841 | 1.00 | 0.00 |
| H           |    |     |     |        |        |        |      |      |
| HETATM10438 | O2 | PRP | 719 | 36.622 | 1.723  | 20.739 | 1.00 | 0.00 |
| O           |    |     |     |        |        |        |      |      |
| HETATM10439 | H5 | PRP | 719 | 36.540 | 1.327  | 19.868 | 1.00 | 0.00 |
| H           |    |     |     |        |        |        |      |      |
| HETATM10440 | C3 | PRP | 719 | 38.054 | 2.218  | 22.700 | 1.00 | 0.00 |
| C           |    |     |     |        |        |        |      |      |
| HETATM10441 | H6 | PRP | 719 | 39.094 | 2.522  | 22.815 | 1.00 | 0.00 |
| H           |    |     |     |        |        |        |      |      |
| HETATM10442 | H7 | PRP | 719 | 37.320 | 2.954  | 23.031 | 1.00 | 0.00 |
| H           |    |     |     |        |        |        |      |      |
| HETATM10443 | H8 | PRP | 719 | 37.904 | 1.236  | 23.149 | 1.00 | 0.00 |
| H           |    |     |     |        |        |        |      |      |



|             |    |     |     |        |        |        |      |      |
|-------------|----|-----|-----|--------|--------|--------|------|------|
| HETATM10444 | O1 | PRP | 720 | 35.440 | 3.143  | 30.089 | 1.00 | 0.00 |
| O           |    |     |     |        |        |        |      |      |
| HETATM10445 | H1 | PRP | 720 | 35.381 | 3.622  | 30.919 | 1.00 | 0.00 |
| H           |    |     |     |        |        |        |      |      |
| HETATM10446 | C1 | PRP | 720 | 34.768 | 1.901  | 30.078 | 1.00 | 0.00 |
| C           |    |     |     |        |        |        |      |      |
| HETATM10447 | H2 | PRP | 720 | 33.688 | 2.022  | 30.158 | 1.00 | 0.00 |
| H           |    |     |     |        |        |        |      |      |
| HETATM10448 | H3 | PRP | 720 | 34.935 | 1.374  | 29.138 | 1.00 | 0.00 |
| H           |    |     |     |        |        |        |      |      |
| HETATM10449 | C2 | PRP | 720 | 35.119 | 1.055  | 31.308 | 1.00 | 0.00 |
| C           |    |     |     |        |        |        |      |      |
| HETATM10450 | H4 | PRP | 720 | 34.625 | 0.083  | 31.285 | 1.00 | 0.00 |
| H           |    |     |     |        |        |        |      |      |
| HETATM10451 | O2 | PRP | 720 | 34.750 | 1.717  | 32.517 | 1.00 | 0.00 |
| O           |    |     |     |        |        |        |      |      |
| HETATM10452 | H5 | PRP | 720 | 33.798 | 1.834  | 32.468 | 1.00 | 0.00 |
| H           |    |     |     |        |        |        |      |      |
| HETATM10453 | C3 | PRP | 720 | 36.636 | 0.690  | 31.295 | 1.00 | 0.00 |
| C           |    |     |     |        |        |        |      |      |
| HETATM10454 | H6 | PRP | 720 | 36.765 | 0.175  | 32.247 | 1.00 | 0.00 |
| H           |    |     |     |        |        |        |      |      |
| HETATM10455 | H7 | PRP | 720 | 36.922 | 0.062  | 30.451 | 1.00 | 0.00 |
| H           |    |     |     |        |        |        |      |      |
| HETATM10456 | H8 | PRP | 720 | 37.229 | 1.589  | 31.464 | 1.00 | 0.00 |
| H           |    |     |     |        |        |        |      |      |
| HETATM10457 | O1 | PRP | 721 | 33.286 | 3.441  | 25.658 | 1.00 | 0.00 |
| O           |    |     |     |        |        |        |      |      |
| HETATM10458 | H1 | PRP | 721 | 33.774 | 4.268  | 25.678 | 1.00 | 0.00 |
| H           |    |     |     |        |        |        |      |      |
| HETATM10459 | C1 | PRP | 721 | 34.206 | 2.446  | 26.100 | 1.00 | 0.00 |
| C           |    |     |     |        |        |        |      |      |
| HETATM10460 | H2 | PRP | 721 | 35.256 | 2.739  | 26.072 | 1.00 | 0.00 |
| H           |    |     |     |        |        |        |      |      |
| HETATM10461 | H3 | PRP | 721 | 34.023 | 2.462  | 27.175 | 1.00 | 0.00 |
| H           |    |     |     |        |        |        |      |      |
| HETATM10462 | C2 | PRP | 721 | 34.083 | 1.092  | 25.476 | 1.00 | 0.00 |
| C           |    |     |     |        |        |        |      |      |
| HETATM10463 | H4 | PRP | 721 | 34.554 | 1.143  | 24.494 | 1.00 | 0.00 |
| H           |    |     |     |        |        |        |      |      |
| HETATM10464 | O2 | PRP | 721 | 32.730 | 0.507  | 25.335 | 1.00 | 0.00 |
| O           |    |     |     |        |        |        |      |      |
| HETATM10465 | H5 | PRP | 721 | 32.221 | 1.180  | 24.878 | 1.00 | 0.00 |
| H           |    |     |     |        |        |        |      |      |
| HETATM10466 | C3 | PRP | 721 | 34.772 | 0.120  | 26.411 | 1.00 | 0.00 |
| C           |    |     |     |        |        |        |      |      |
| HETATM10467 | H6 | PRP | 721 | 34.257 | 0.098  | 27.371 | 1.00 | 0.00 |
| H           |    |     |     |        |        |        |      |      |
| HETATM10468 | H7 | PRP | 721 | 34.914 | -0.918 | 26.111 | 1.00 | 0.00 |
| H           |    |     |     |        |        |        |      |      |
| HETATM10469 | H8 | PRP | 721 | 35.766 | 0.531  | 26.590 | 1.00 | 0.00 |
| H           |    |     |     |        |        |        |      |      |
| HETATM10470 | O1 | PRP | 722 | 21.753 | -6.155 | 20.597 | 1.00 | 0.00 |
| O           |    |     |     |        |        |        |      |      |
| HETATM10471 | H1 | PRP | 722 | 21.855 | -6.049 | 21.546 | 1.00 | 0.00 |
| H           |    |     |     |        |        |        |      |      |

|             |    |     |     |        |         |        |      |      |
|-------------|----|-----|-----|--------|---------|--------|------|------|
| HETATM10472 | C1 | PRP | 722 | 22.909 | -7.067  | 20.238 | 1.00 | 0.00 |
| C           |    |     |     |        |         |        |      |      |
| HETATM10473 | H2 | PRP | 722 | 23.596 | -6.511  | 19.601 | 1.00 | 0.00 |
| H           |    |     |     |        |         |        |      |      |
| HETATM10474 | H3 | PRP | 722 | 23.313 | -7.480  | 21.162 | 1.00 | 0.00 |
| H           |    |     |     |        |         |        |      |      |
| HETATM10475 | C2 | PRP | 722 | 22.347 | -8.294  | 19.467 | 1.00 | 0.00 |
| C           |    |     |     |        |         |        |      |      |
| HETATM10476 | H4 | PRP | 722 | 23.112 | -8.806  | 18.883 | 1.00 | 0.00 |
| H           |    |     |     |        |         |        |      |      |
| HETATM10477 | O2 | PRP | 722 | 21.362 | -7.823  | 18.571 | 1.00 | 0.00 |
| O           |    |     |     |        |         |        |      |      |
| HETATM10478 | H5 | PRP | 722 | 21.025 | -7.027  | 18.991 | 1.00 | 0.00 |
| H           |    |     |     |        |         |        |      |      |
| HETATM10479 | C3 | PRP | 722 | 21.661 | -9.309  | 20.348 | 1.00 | 0.00 |
| C           |    |     |     |        |         |        |      |      |
| HETATM10480 | H6 | PRP | 722 | 21.229 | -10.003 | 19.626 | 1.00 | 0.00 |
| H           |    |     |     |        |         |        |      |      |
| HETATM10481 | H7 | PRP | 722 | 22.409 | -9.846  | 20.932 | 1.00 | 0.00 |
| H           |    |     |     |        |         |        |      |      |
| HETATM10482 | H8 | PRP | 722 | 20.900 | -8.815  | 20.951 | 1.00 | 0.00 |
| H           |    |     |     |        |         |        |      |      |
| HETATM10483 | O1 | PRP | 723 | 26.967 | 3.524   | 20.685 | 1.00 | 0.00 |
| O           |    |     |     |        |         |        |      |      |
| HETATM10484 | H1 | PRP | 723 | 26.161 | 3.015   | 20.800 | 1.00 | 0.00 |
| H           |    |     |     |        |         |        |      |      |
| HETATM10485 | C1 | PRP | 723 | 26.720 | 4.870   | 21.180 | 1.00 | 0.00 |
| C           |    |     |     |        |         |        |      |      |
| HETATM10486 | H2 | PRP | 723 | 25.916 | 5.277   | 20.566 | 1.00 | 0.00 |
| H           |    |     |     |        |         |        |      |      |
| HETATM10487 | H3 | PRP | 723 | 26.448 | 4.825   | 22.234 | 1.00 | 0.00 |
| H           |    |     |     |        |         |        |      |      |
| HETATM10488 | C2 | PRP | 723 | 27.973 | 5.714   | 21.124 | 1.00 | 0.00 |
| C           |    |     |     |        |         |        |      |      |
| HETATM10489 | H4 | PRP | 723 | 27.745 | 6.733   | 21.435 | 1.00 | 0.00 |
| H           |    |     |     |        |         |        |      |      |
| HETATM10490 | O2 | PRP | 723 | 28.258 | 5.754   | 19.759 | 1.00 | 0.00 |
| O           |    |     |     |        |         |        |      |      |
| HETATM10491 | H5 | PRP | 723 | 28.248 | 4.840   | 19.467 | 1.00 | 0.00 |
| H           |    |     |     |        |         |        |      |      |
| HETATM10492 | C3 | PRP | 723 | 29.146 | 5.158   | 21.946 | 1.00 | 0.00 |
| C           |    |     |     |        |         |        |      |      |
| HETATM10493 | H6 | PRP | 723 | 29.421 | 4.138   | 21.681 | 1.00 | 0.00 |
| H           |    |     |     |        |         |        |      |      |
| HETATM10494 | H7 | PRP | 723 | 30.068 | 5.603   | 21.572 | 1.00 | 0.00 |
| H           |    |     |     |        |         |        |      |      |
| HETATM10495 | H8 | PRP | 723 | 29.006 | 5.277   | 23.021 | 1.00 | 0.00 |
| H           |    |     |     |        |         |        |      |      |
| HETATM10496 | O1 | PRP | 724 | 16.502 | 1.223   | 19.269 | 1.00 | 0.00 |
| O           |    |     |     |        |         |        |      |      |
| HETATM10497 | H1 | PRP | 724 | 15.975 | 0.424   | 19.346 | 1.00 | 0.00 |
| H           |    |     |     |        |         |        |      |      |
| HETATM10498 | C1 | PRP | 724 | 16.643 | 1.797   | 20.617 | 1.00 | 0.00 |
| C           |    |     |     |        |         |        |      |      |
| HETATM10499 | H2 | PRP | 724 | 16.301 | 1.044   | 21.328 | 1.00 | 0.00 |
| H           |    |     |     |        |         |        |      |      |

|             |    |     |     |        |       |        |      |      |
|-------------|----|-----|-----|--------|-------|--------|------|------|
| HETATM10500 | H3 | PRP | 724 | 17.664 | 2.176 | 20.660 | 1.00 | 0.00 |
| H           |    |     |     |        |       |        |      |      |
| HETATM10501 | C2 | PRP | 724 | 15.749 | 3.057 | 20.795 | 1.00 | 0.00 |
| C           |    |     |     |        |       |        |      |      |
| HETATM10502 | H4 | PRP | 724 | 14.743 | 2.789 | 20.474 | 1.00 | 0.00 |
| H           |    |     |     |        |       |        |      |      |
| HETATM10503 | O2 | PRP | 724 | 16.138 | 4.190 | 20.063 | 1.00 | 0.00 |
| O           |    |     |     |        |       |        |      |      |
| HETATM10504 | H5 | PRP | 724 | 16.137 | 3.933 | 19.138 | 1.00 | 0.00 |
| H           |    |     |     |        |       |        |      |      |
| HETATM10505 | C3 | PRP | 724 | 15.731 | 3.383 | 22.307 | 1.00 | 0.00 |
| C           |    |     |     |        |       |        |      |      |
| HETATM10506 | H6 | PRP | 724 | 15.311 | 2.494 | 22.777 | 1.00 | 0.00 |
| H           |    |     |     |        |       |        |      |      |
| HETATM10507 | H7 | PRP | 724 | 16.695 | 3.691 | 22.714 | 1.00 | 0.00 |
| H           |    |     |     |        |       |        |      |      |
| HETATM10508 | H8 | PRP | 724 | 14.998 | 4.176 | 22.456 | 1.00 | 0.00 |
| H           |    |     |     |        |       |        |      |      |
| HETATM10509 | O1 | PRP | 725 | 32.938 | 9.568 | 12.119 | 1.00 | 0.00 |
| O           |    |     |     |        |       |        |      |      |
| HETATM10510 | H1 | PRP | 725 | 32.215 | 9.325 | 12.701 | 1.00 | 0.00 |
| H           |    |     |     |        |       |        |      |      |
| HETATM10511 | C1 | PRP | 725 | 34.105 | 8.803 | 12.581 | 1.00 | 0.00 |
| C           |    |     |     |        |       |        |      |      |
| HETATM10512 | H2 | PRP | 725 | 34.670 | 8.306 | 11.792 | 1.00 | 0.00 |
| H           |    |     |     |        |       |        |      |      |
| HETATM10513 | H3 | PRP | 725 | 34.818 | 9.512 | 13.002 | 1.00 | 0.00 |
| H           |    |     |     |        |       |        |      |      |
| HETATM10514 | C2 | PRP | 725 | 33.743 | 7.677 | 13.619 | 1.00 | 0.00 |
| C           |    |     |     |        |       |        |      |      |
| HETATM10515 | H4 | PRP | 725 | 34.653 | 7.086 | 13.726 | 1.00 | 0.00 |
| H           |    |     |     |        |       |        |      |      |
| HETATM10516 | O2 | PRP | 725 | 32.705 | 6.847 | 13.067 | 1.00 | 0.00 |
| O           |    |     |     |        |       |        |      |      |
| HETATM10517 | H5 | PRP | 725 | 32.052 | 6.775 | 13.767 | 1.00 | 0.00 |
| H           |    |     |     |        |       |        |      |      |
| HETATM10518 | C3 | PRP | 725 | 33.349 | 8.133 | 15.085 | 1.00 | 0.00 |
| C           |    |     |     |        |       |        |      |      |
| HETATM10519 | H6 | PRP | 725 | 34.213 | 8.492 | 15.644 | 1.00 | 0.00 |
| H           |    |     |     |        |       |        |      |      |
| HETATM10520 | H7 | PRP | 725 | 32.687 | 8.984 | 14.928 | 1.00 | 0.00 |
| H           |    |     |     |        |       |        |      |      |
| HETATM10521 | H8 | PRP | 725 | 32.833 | 7.358 | 15.652 | 1.00 | 0.00 |
| H           |    |     |     |        |       |        |      |      |
| HETATM10522 | O1 | PRP | 726 | 35.349 | 8.131 | 27.423 | 1.00 | 0.00 |
| O           |    |     |     |        |       |        |      |      |
| HETATM10523 | H1 | PRP | 726 | 35.666 | 9.016 | 27.619 | 1.00 | 0.00 |
| H           |    |     |     |        |       |        |      |      |
| HETATM10524 | C1 | PRP | 726 | 35.469 | 7.464 | 28.644 | 1.00 | 0.00 |
| C           |    |     |     |        |       |        |      |      |
| HETATM10525 | H2 | PRP | 726 | 34.567 | 7.609 | 29.238 | 1.00 | 0.00 |
| H           |    |     |     |        |       |        |      |      |
| HETATM10526 | H3 | PRP | 726 | 35.696 | 6.402 | 28.547 | 1.00 | 0.00 |
| H           |    |     |     |        |       |        |      |      |
| HETATM10527 | C2 | PRP | 726 | 36.666 | 8.076 | 29.481 | 1.00 | 0.00 |
| C           |    |     |     |        |       |        |      |      |

|             |    |     |     |        |        |        |      |      |
|-------------|----|-----|-----|--------|--------|--------|------|------|
| HETATM10528 | H4 | PRP | 726 | 36.701 | 7.727  | 30.513 | 1.00 | 0.00 |
| H           |    |     |     |        |        |        |      |      |
| HETATM10529 | O2 | PRP | 726 | 36.612 | 9.494  | 29.561 | 1.00 | 0.00 |
| O           |    |     |     |        |        |        |      |      |
| HETATM10530 | H5 | PRP | 726 | 36.848 | 9.751  | 30.456 | 1.00 | 0.00 |
| H           |    |     |     |        |        |        |      |      |
| HETATM10531 | C3 | PRP | 726 | 38.039 | 7.751  | 28.904 | 1.00 | 0.00 |
| C           |    |     |     |        |        |        |      |      |
| HETATM10532 | H6 | PRP | 726 | 38.057 | 7.941  | 27.831 | 1.00 | 0.00 |
| H           |    |     |     |        |        |        |      |      |
| HETATM10533 | H7 | PRP | 726 | 38.734 | 8.474  | 29.331 | 1.00 | 0.00 |
| H           |    |     |     |        |        |        |      |      |
| HETATM10534 | H8 | PRP | 726 | 38.351 | 6.723  | 29.087 | 1.00 | 0.00 |
| H           |    |     |     |        |        |        |      |      |
| HETATM10535 | O1 | PRP | 727 | 40.682 | 25.704 | 20.942 | 1.00 | 0.00 |
| O           |    |     |     |        |        |        |      |      |
| HETATM10536 | H1 | PRP | 727 | 40.420 | 25.593 | 21.859 | 1.00 | 0.00 |
| H           |    |     |     |        |        |        |      |      |
| HETATM10537 | C1 | PRP | 727 | 40.734 | 24.411 | 20.370 | 1.00 | 0.00 |
| C           |    |     |     |        |        |        |      |      |
| HETATM10538 | H2 | PRP | 727 | 39.920 | 24.167 | 19.687 | 1.00 | 0.00 |
| H           |    |     |     |        |        |        |      |      |
| HETATM10539 | H3 | PRP | 727 | 41.643 | 24.356 | 19.770 | 1.00 | 0.00 |
| H           |    |     |     |        |        |        |      |      |
| HETATM10540 | C2 | PRP | 727 | 40.914 | 23.308 | 21.503 | 1.00 | 0.00 |
| C           |    |     |     |        |        |        |      |      |
| HETATM10541 | H4 | PRP | 727 | 41.057 | 22.352 | 21.000 | 1.00 | 0.00 |
| H           |    |     |     |        |        |        |      |      |
| HETATM10542 | O2 | PRP | 727 | 39.805 | 23.197 | 22.336 | 1.00 | 0.00 |
| O           |    |     |     |        |        |        |      |      |
| HETATM10543 | H5 | PRP | 727 | 39.915 | 23.803 | 23.073 | 1.00 | 0.00 |
| H           |    |     |     |        |        |        |      |      |
| HETATM10544 | C3 | PRP | 727 | 42.234 | 23.486 | 22.236 | 1.00 | 0.00 |
| C           |    |     |     |        |        |        |      |      |
| HETATM10545 | H6 | PRP | 727 | 43.077 | 23.157 | 21.628 | 1.00 | 0.00 |
| H           |    |     |     |        |        |        |      |      |
| HETATM10546 | H7 | PRP | 727 | 42.407 | 24.538 | 22.460 | 1.00 | 0.00 |
| H           |    |     |     |        |        |        |      |      |
| HETATM10547 | H8 | PRP | 727 | 42.254 | 22.933 | 23.175 | 1.00 | 0.00 |
| H           |    |     |     |        |        |        |      |      |
| HETATM10548 | O1 | PRP | 728 | 34.036 | 28.745 | 12.730 | 1.00 | 0.00 |
| O           |    |     |     |        |        |        |      |      |
| HETATM10549 | H1 | PRP | 728 | 33.746 | 28.887 | 11.826 | 1.00 | 0.00 |
| H           |    |     |     |        |        |        |      |      |
| HETATM10550 | C1 | PRP | 728 | 33.154 | 29.299 | 13.579 | 1.00 | 0.00 |
| C           |    |     |     |        |        |        |      |      |
| HETATM10551 | H2 | PRP | 728 | 33.317 | 28.922 | 14.589 | 1.00 | 0.00 |
| H           |    |     |     |        |        |        |      |      |
| HETATM10552 | H3 | PRP | 728 | 33.219 | 30.387 | 13.538 | 1.00 | 0.00 |
| H           |    |     |     |        |        |        |      |      |
| HETATM10553 | C2 | PRP | 728 | 31.777 | 28.895 | 13.035 | 1.00 | 0.00 |
| C           |    |     |     |        |        |        |      |      |
| HETATM10554 | H4 | PRP | 728 | 31.866 | 27.941 | 12.514 | 1.00 | 0.00 |
| H           |    |     |     |        |        |        |      |      |
| HETATM10555 | O2 | PRP | 728 | 31.407 | 29.840 | 12.039 | 1.00 | 0.00 |
| O           |    |     |     |        |        |        |      |      |

|             |    |     |     |        |        |        |      |      |
|-------------|----|-----|-----|--------|--------|--------|------|------|
| HETATM10556 | H5 | PRP | 728 | 31.453 | 30.721 | 12.416 | 1.00 | 0.00 |
| H           |    |     |     |        |        |        |      |      |
| HETATM10557 | C3 | PRP | 728 | 30.660 | 28.995 | 14.074 | 1.00 | 0.00 |
| C           |    |     |     |        |        |        |      |      |
| HETATM10558 | H6 | PRP | 728 | 30.853 | 28.451 | 14.999 | 1.00 | 0.00 |
| H           |    |     |     |        |        |        |      |      |
| HETATM10559 | H7 | PRP | 728 | 30.368 | 30.001 | 14.376 | 1.00 | 0.00 |
| H           |    |     |     |        |        |        |      |      |
| HETATM10560 | H8 | PRP | 728 | 29.769 | 28.533 | 13.650 | 1.00 | 0.00 |
| H           |    |     |     |        |        |        |      |      |
| HETATM10561 | O1 | PRP | 729 | 30.129 | 1.059  | 17.956 | 1.00 | 0.00 |
| O           |    |     |     |        |        |        |      |      |
| HETATM10562 | H1 | PRP | 729 | 29.175 | 1.061  | 17.850 | 1.00 | 0.00 |
| H           |    |     |     |        |        |        |      |      |
| HETATM10563 | C1 | PRP | 729 | 30.805 | 1.952  | 17.108 | 1.00 | 0.00 |
| C           |    |     |     |        |        |        |      |      |
| HETATM10564 | H2 | PRP | 729 | 31.867 | 1.718  | 17.176 | 1.00 | 0.00 |
| H           |    |     |     |        |        |        |      |      |
| HETATM10565 | H3 | PRP | 729 | 30.367 | 1.814  | 16.119 | 1.00 | 0.00 |
| H           |    |     |     |        |        |        |      |      |
| HETATM10566 | C2 | PRP | 729 | 30.772 | 3.427  | 17.571 | 1.00 | 0.00 |
| C           |    |     |     |        |        |        |      |      |
| HETATM10567 | H4 | PRP | 729 | 31.657 | 3.908  | 17.157 | 1.00 | 0.00 |
| H           |    |     |     |        |        |        |      |      |
| HETATM10568 | O2 | PRP | 729 | 31.017 | 3.463  | 18.943 | 1.00 | 0.00 |
| O           |    |     |     |        |        |        |      |      |
| HETATM10569 | H5 | PRP | 729 | 30.531 | 2.745  | 19.356 | 1.00 | 0.00 |
| H           |    |     |     |        |        |        |      |      |
| HETATM10570 | C3 | PRP | 729 | 29.605 | 4.324  | 17.191 | 1.00 | 0.00 |
| C           |    |     |     |        |        |        |      |      |
| HETATM10571 | H6 | PRP | 729 | 29.800 | 5.382  | 17.370 | 1.00 | 0.00 |
| H           |    |     |     |        |        |        |      |      |
| HETATM10572 | H7 | PRP | 729 | 29.409 | 4.337  | 16.118 | 1.00 | 0.00 |
| H           |    |     |     |        |        |        |      |      |
| HETATM10573 | H8 | PRP | 729 | 28.693 | 4.061  | 17.726 | 1.00 | 0.00 |
| H           |    |     |     |        |        |        |      |      |
| HETATM10574 | O1 | PRP | 730 | 29.689 | 15.777 | 9.821  | 1.00 | 0.00 |
| O           |    |     |     |        |        |        |      |      |
| HETATM10575 | H1 | PRP | 730 | 29.610 | 15.502 | 8.904  | 1.00 | 0.00 |
| H           |    |     |     |        |        |        |      |      |
| HETATM10576 | C1 | PRP | 730 | 28.531 | 15.142 | 10.360 | 1.00 | 0.00 |
| C           |    |     |     |        |        |        |      |      |
| HETATM10577 | H2 | PRP | 730 | 27.686 | 15.788 | 10.121 | 1.00 | 0.00 |
| H           |    |     |     |        |        |        |      |      |
| HETATM10578 | H3 | PRP | 730 | 28.319 | 14.237 | 9.791  | 1.00 | 0.00 |
| H           |    |     |     |        |        |        |      |      |
| HETATM10579 | C2 | PRP | 730 | 28.512 | 14.924 | 11.895 | 1.00 | 0.00 |
| C           |    |     |     |        |        |        |      |      |
| HETATM10580 | H4 | PRP | 730 | 28.941 | 15.772 | 12.429 | 1.00 | 0.00 |
| H           |    |     |     |        |        |        |      |      |
| HETATM10581 | O2 | PRP | 730 | 29.282 | 13.832 | 12.199 | 1.00 | 0.00 |
| O           |    |     |     |        |        |        |      |      |
| HETATM10582 | H5 | PRP | 730 | 30.138 | 14.048 | 11.822 | 1.00 | 0.00 |
| H           |    |     |     |        |        |        |      |      |
| HETATM10583 | C3 | PRP | 730 | 27.152 | 14.746 | 12.516 | 1.00 | 0.00 |
| C           |    |     |     |        |        |        |      |      |

|             |    |     |     |        |        |        |      |      |
|-------------|----|-----|-----|--------|--------|--------|------|------|
| HETATM10584 | H6 | PRP | 730 | 26.581 | 15.664 | 12.656 | 1.00 | 0.00 |
| H           |    |     |     |        |        |        |      |      |
| HETATM10585 | H7 | PRP | 730 | 26.485 | 14.157 | 11.888 | 1.00 | 0.00 |
| H           |    |     |     |        |        |        |      |      |
| HETATM10586 | H8 | PRP | 730 | 27.243 | 14.187 | 13.447 | 1.00 | 0.00 |
| H           |    |     |     |        |        |        |      |      |
| HETATM10587 | O1 | PRP | 731 | 27.099 | 15.978 | 6.390  | 1.00 | 0.00 |
| O           |    |     |     |        |        |        |      |      |
| HETATM10588 | H1 | PRP | 731 | 27.460 | 15.191 | 6.805  | 1.00 | 0.00 |
| H           |    |     |     |        |        |        |      |      |
| HETATM10589 | C1 | PRP | 731 | 28.100 | 16.943 | 6.374  | 1.00 | 0.00 |
| C           |    |     |     |        |        |        |      |      |
| HETATM10590 | H2 | PRP | 731 | 27.999 | 17.544 | 5.471  | 1.00 | 0.00 |
| H           |    |     |     |        |        |        |      |      |
| HETATM10591 | H3 | PRP | 731 | 28.062 | 17.442 | 7.343  | 1.00 | 0.00 |
| H           |    |     |     |        |        |        |      |      |
| HETATM10592 | C2 | PRP | 731 | 29.449 | 16.075 | 6.283  | 1.00 | 0.00 |
| C           |    |     |     |        |        |        |      |      |
| HETATM10593 | H4 | PRP | 731 | 29.570 | 15.666 | 5.280  | 1.00 | 0.00 |
| H           |    |     |     |        |        |        |      |      |
| HETATM10594 | O2 | PRP | 731 | 29.343 | 15.036 | 7.237  | 1.00 | 0.00 |
| O           |    |     |     |        |        |        |      |      |
| HETATM10595 | H5 | PRP | 731 | 29.947 | 14.345 | 6.954  | 1.00 | 0.00 |
| H           |    |     |     |        |        |        |      |      |
| HETATM10596 | C3 | PRP | 731 | 30.654 | 16.939 | 6.723  | 1.00 | 0.00 |
| C           |    |     |     |        |        |        |      |      |
| HETATM10597 | H6 | PRP | 731 | 30.654 | 17.070 | 7.805  | 1.00 | 0.00 |
| H           |    |     |     |        |        |        |      |      |
| HETATM10598 | H7 | PRP | 731 | 31.572 | 16.447 | 6.401  | 1.00 | 0.00 |
| H           |    |     |     |        |        |        |      |      |
| HETATM10599 | H8 | PRP | 731 | 30.699 | 17.877 | 6.168  | 1.00 | 0.00 |
| H           |    |     |     |        |        |        |      |      |
| HETATM10600 | O1 | PRP | 732 | 34.851 | 11.304 | 16.589 | 1.00 | 0.00 |
| O           |    |     |     |        |        |        |      |      |
| HETATM10601 | H1 | PRP | 732 | 34.435 | 11.798 | 15.879 | 1.00 | 0.00 |
| H           |    |     |     |        |        |        |      |      |
| HETATM10602 | C1 | PRP | 732 | 35.442 | 12.327 | 17.310 | 1.00 | 0.00 |
| C           |    |     |     |        |        |        |      |      |
| HETATM10603 | H2 | PRP | 732 | 35.619 | 12.089 | 18.359 | 1.00 | 0.00 |
| H           |    |     |     |        |        |        |      |      |
| HETATM10604 | H3 | PRP | 732 | 36.421 | 12.626 | 16.935 | 1.00 | 0.00 |
| H           |    |     |     |        |        |        |      |      |
| HETATM10605 | C2 | PRP | 732 | 34.431 | 13.433 | 17.191 | 1.00 | 0.00 |
| C           |    |     |     |        |        |        |      |      |
| HETATM10606 | H4 | PRP | 732 | 33.460 | 13.080 | 17.538 | 1.00 | 0.00 |
| H           |    |     |     |        |        |        |      |      |
| HETATM10607 | O2 | PRP | 732 | 34.527 | 13.703 | 15.869 | 1.00 | 0.00 |
| O           |    |     |     |        |        |        |      |      |
| HETATM10608 | H5 | PRP | 732 | 33.803 | 14.320 | 15.738 | 1.00 | 0.00 |
| H           |    |     |     |        |        |        |      |      |
| HETATM10609 | C3 | PRP | 732 | 34.900 | 14.684 | 17.837 | 1.00 | 0.00 |
| C           |    |     |     |        |        |        |      |      |
| HETATM10610 | H6 | PRP | 732 | 34.770 | 14.701 | 18.919 | 1.00 | 0.00 |
| H           |    |     |     |        |        |        |      |      |
| HETATM10611 | H7 | PRP | 732 | 35.977 | 14.776 | 17.696 | 1.00 | 0.00 |
| H           |    |     |     |        |        |        |      |      |

|             |    |     |     |        |        |        |      |      |
|-------------|----|-----|-----|--------|--------|--------|------|------|
| HETATM10612 | H8 | PRP | 732 | 34.293 | 15.527 | 17.508 | 1.00 | 0.00 |
| H           |    |     |     |        |        |        |      |      |
| HETATM10613 | O1 | PRP | 733 | 38.329 | 20.196 | 17.985 | 1.00 | 0.00 |
| O           |    |     |     |        |        |        |      |      |
| HETATM10614 | H1 | PRP | 733 | 38.727 | 20.500 | 18.804 | 1.00 | 0.00 |
| H           |    |     |     |        |        |        |      |      |
| HETATM10615 | C1 | PRP | 733 | 39.149 | 20.628 | 16.895 | 1.00 | 0.00 |
| C           |    |     |     |        |        |        |      |      |
| HETATM10616 | H2 | PRP | 733 | 40.158 | 20.214 | 16.913 | 1.00 | 0.00 |
| H           |    |     |     |        |        |        |      |      |
| HETATM10617 | H3 | PRP | 733 | 38.573 | 20.511 | 15.977 | 1.00 | 0.00 |
| H           |    |     |     |        |        |        |      |      |
| HETATM10618 | C2 | PRP | 733 | 39.285 | 22.123 | 17.157 | 1.00 | 0.00 |
| C           |    |     |     |        |        |        |      |      |
| HETATM10619 | H4 | PRP | 733 | 39.514 | 22.321 | 18.204 | 1.00 | 0.00 |
| H           |    |     |     |        |        |        |      |      |
| HETATM10620 | O2 | PRP | 733 | 38.026 | 22.711 | 16.887 | 1.00 | 0.00 |
| O           |    |     |     |        |        |        |      |      |
| HETATM10621 | H5 | PRP | 733 | 37.321 | 22.283 | 17.378 | 1.00 | 0.00 |
| H           |    |     |     |        |        |        |      |      |
| HETATM10622 | C3 | PRP | 733 | 40.398 | 22.657 | 16.340 | 1.00 | 0.00 |
| C           |    |     |     |        |        |        |      |      |
| HETATM10623 | H6 | PRP | 733 | 41.314 | 22.300 | 16.812 | 1.00 | 0.00 |
| H           |    |     |     |        |        |        |      |      |
| HETATM10624 | H7 | PRP | 733 | 40.372 | 22.332 | 15.300 | 1.00 | 0.00 |
| H           |    |     |     |        |        |        |      |      |
| HETATM10625 | H8 | PRP | 733 | 40.379 | 23.738 | 16.472 | 1.00 | 0.00 |
| H           |    |     |     |        |        |        |      |      |
| HETATM10626 | O1 | PRP | 734 | 46.436 | 31.251 | 11.170 | 1.00 | 0.00 |
| O           |    |     |     |        |        |        |      |      |
| HETATM10627 | H1 | PRP | 734 | 47.201 | 31.026 | 10.635 | 1.00 | 0.00 |
| H           |    |     |     |        |        |        |      |      |
| HETATM10628 | C1 | PRP | 734 | 45.292 | 30.898 | 10.458 | 1.00 | 0.00 |
| C           |    |     |     |        |        |        |      |      |
| HETATM10629 | H2 | PRP | 734 | 45.531 | 30.735 | 9.407  | 1.00 | 0.00 |
| H           |    |     |     |        |        |        |      |      |
| HETATM10630 | H3 | PRP | 734 | 44.849 | 29.999 | 10.888 | 1.00 | 0.00 |
| H           |    |     |     |        |        |        |      |      |
| HETATM10631 | C2 | PRP | 734 | 44.222 | 31.998 | 10.579 | 1.00 | 0.00 |
| C           |    |     |     |        |        |        |      |      |
| HETATM10632 | H4 | PRP | 734 | 44.268 | 32.763 | 9.804  | 1.00 | 0.00 |
| H           |    |     |     |        |        |        |      |      |
| HETATM10633 | O2 | PRP | 734 | 44.180 | 32.602 | 11.907 | 1.00 | 0.00 |
| O           |    |     |     |        |        |        |      |      |
| HETATM10634 | H5 | PRP | 734 | 45.110 | 32.787 | 12.058 | 1.00 | 0.00 |
| H           |    |     |     |        |        |        |      |      |
| HETATM10635 | C3 | PRP | 734 | 42.927 | 31.234 | 10.387 | 1.00 | 0.00 |
| C           |    |     |     |        |        |        |      |      |
| HETATM10636 | H6 | PRP | 734 | 42.089 | 31.927 | 10.457 | 1.00 | 0.00 |
| H           |    |     |     |        |        |        |      |      |
| HETATM10637 | H7 | PRP | 734 | 42.904 | 30.754 | 9.409  | 1.00 | 0.00 |
| H           |    |     |     |        |        |        |      |      |
| HETATM10638 | H8 | PRP | 734 | 42.859 | 30.437 | 11.128 | 1.00 | 0.00 |
| H           |    |     |     |        |        |        |      |      |
| HETATM10639 | O1 | PRP | 735 | 41.931 | 42.104 | 4.141  | 1.00 | 0.00 |
| O           |    |     |     |        |        |        |      |      |

|             |    |     |     |        |        |        |      |      |
|-------------|----|-----|-----|--------|--------|--------|------|------|
| HETATM10640 | H1 | PRP | 735 | 42.838 | 42.104 | 4.454  | 1.00 | 0.00 |
| H           |    |     |     |        |        |        |      |      |
| HETATM10641 | C1 | PRP | 735 | 41.998 | 41.839 | 2.709  | 1.00 | 0.00 |
| C           |    |     |     |        |        |        |      |      |
| HETATM10642 | H2 | PRP | 735 | 41.141 | 42.158 | 2.115  | 1.00 | 0.00 |
| H           |    |     |     |        |        |        |      |      |
| HETATM10643 | H3 | PRP | 735 | 42.733 | 42.513 | 2.270  | 1.00 | 0.00 |
| H           |    |     |     |        |        |        |      |      |
| HETATM10644 | C2 | PRP | 735 | 42.377 | 40.345 | 2.324  | 1.00 | 0.00 |
| C           |    |     |     |        |        |        |      |      |
| HETATM10645 | H4 | PRP | 735 | 42.118 | 40.225 | 1.272  | 1.00 | 0.00 |
| H           |    |     |     |        |        |        |      |      |
| HETATM10646 | O2 | PRP | 735 | 41.460 | 39.508 | 3.030  | 1.00 | 0.00 |
| O           |    |     |     |        |        |        |      |      |
| HETATM10647 | H5 | PRP | 735 | 41.792 | 39.608 | 3.925  | 1.00 | 0.00 |
| H           |    |     |     |        |        |        |      |      |
| HETATM10648 | C3 | PRP | 735 | 43.759 | 39.927 | 2.721  | 1.00 | 0.00 |
| C           |    |     |     |        |        |        |      |      |
| HETATM10649 | H6 | PRP | 735 | 43.906 | 39.769 | 3.790  | 1.00 | 0.00 |
| H           |    |     |     |        |        |        |      |      |
| HETATM10650 | H7 | PRP | 735 | 43.987 | 38.973 | 2.247  | 1.00 | 0.00 |
| H           |    |     |     |        |        |        |      |      |
| HETATM10651 | H8 | PRP | 735 | 44.439 | 40.682 | 2.326  | 1.00 | 0.00 |
| H           |    |     |     |        |        |        |      |      |
| HETATM10652 | O1 | PRP | 736 | 21.215 | -5.221 | 8.102  | 1.00 | 0.00 |
| O           |    |     |     |        |        |        |      |      |
| HETATM10653 | H1 | PRP | 736 | 21.844 | -5.632 | 8.699  | 1.00 | 0.00 |
| H           |    |     |     |        |        |        |      |      |
| HETATM10654 | C1 | PRP | 736 | 21.964 | -4.519 | 7.086  | 1.00 | 0.00 |
| C           |    |     |     |        |        |        |      |      |
| HETATM10655 | H2 | PRP | 736 | 22.449 | -5.268 | 6.461  | 1.00 | 0.00 |
| H           |    |     |     |        |        |        |      |      |
| HETATM10656 | H3 | PRP | 736 | 21.208 | -3.963 | 6.531  | 1.00 | 0.00 |
| H           |    |     |     |        |        |        |      |      |
| HETATM10657 | C2 | PRP | 736 | 23.074 | -3.619 | 7.735  | 1.00 | 0.00 |
| C           |    |     |     |        |        |        |      |      |
| HETATM10658 | H4 | PRP | 736 | 23.782 | -4.289 | 8.222  | 1.00 | 0.00 |
| H           |    |     |     |        |        |        |      |      |
| HETATM10659 | O2 | PRP | 736 | 22.485 | -2.710 | 8.661  | 1.00 | 0.00 |
| O           |    |     |     |        |        |        |      |      |
| HETATM10660 | H5 | PRP | 736 | 21.827 | -2.234 | 8.150  | 1.00 | 0.00 |
| H           |    |     |     |        |        |        |      |      |
| HETATM10661 | C3 | PRP | 736 | 23.888 | -2.976 | 6.636  | 1.00 | 0.00 |
| C           |    |     |     |        |        |        |      |      |
| HETATM10662 | H6 | PRP | 736 | 23.288 | -2.094 | 6.410  | 1.00 | 0.00 |
| H           |    |     |     |        |        |        |      |      |
| HETATM10663 | H7 | PRP | 736 | 24.818 | -2.594 | 7.058  | 1.00 | 0.00 |
| H           |    |     |     |        |        |        |      |      |
| HETATM10664 | H8 | PRP | 736 | 23.991 | -3.589 | 5.740  | 1.00 | 0.00 |
| H           |    |     |     |        |        |        |      |      |
| HETATM10665 | O1 | PRP | 737 | 15.956 | 6.585  | 13.051 | 1.00 | 0.00 |
| O           |    |     |     |        |        |        |      |      |
| HETATM10666 | H1 | PRP | 737 | 16.460 | 7.374  | 13.263 | 1.00 | 0.00 |
| H           |    |     |     |        |        |        |      |      |
| HETATM10667 | C1 | PRP | 737 | 16.539 | 5.539  | 13.836 | 1.00 | 0.00 |
| C           |    |     |     |        |        |        |      |      |



|             |    |     |     |        |        |        |      |      |
|-------------|----|-----|-----|--------|--------|--------|------|------|
| HETATM10668 | H2 | PRP | 737 | 16.468 | 5.866  | 14.874 | 1.00 | 0.00 |
| H           |    |     |     |        |        |        |      |      |
| HETATM10669 | H3 | PRP | 737 | 16.033 | 4.587  | 13.677 | 1.00 | 0.00 |
| H           |    |     |     |        |        |        |      |      |
| HETATM10670 | C2 | PRP | 737 | 18.032 | 5.361  | 13.363 | 1.00 | 0.00 |
| C           |    |     |     |        |        |        |      |      |
| HETATM10671 | H4 | PRP | 737 | 18.457 | 4.468  | 13.822 | 1.00 | 0.00 |
| H           |    |     |     |        |        |        |      |      |
| HETATM10672 | O2 | PRP | 737 | 18.879 | 6.413  | 13.751 | 1.00 | 0.00 |
| O           |    |     |     |        |        |        |      |      |
| HETATM10673 | H5 | PRP | 737 | 18.332 | 7.176  | 13.549 | 1.00 | 0.00 |
| H           |    |     |     |        |        |        |      |      |
| HETATM10674 | C3 | PRP | 737 | 18.211 | 5.197  | 11.832 | 1.00 | 0.00 |
| C           |    |     |     |        |        |        |      |      |
| HETATM10675 | H6 | PRP | 737 | 17.465 | 4.515  | 11.426 | 1.00 | 0.00 |
| H           |    |     |     |        |        |        |      |      |
| HETATM10676 | H7 | PRP | 737 | 18.256 | 6.169  | 11.341 | 1.00 | 0.00 |
| H           |    |     |     |        |        |        |      |      |
| HETATM10677 | H8 | PRP | 737 | 19.183 | 4.754  | 11.612 | 1.00 | 0.00 |
| H           |    |     |     |        |        |        |      |      |
| HETATM10678 | O1 | PRP | 738 | 11.685 | 7.367  | 32.239 | 1.00 | 0.00 |
| O           |    |     |     |        |        |        |      |      |
| HETATM10679 | H1 | PRP | 738 | 11.052 | 6.645  | 32.234 | 1.00 | 0.00 |
| H           |    |     |     |        |        |        |      |      |
| HETATM10680 | C1 | PRP | 738 | 12.967 | 6.749  | 32.591 | 1.00 | 0.00 |
| C           |    |     |     |        |        |        |      |      |
| HETATM10681 | H2 | PRP | 738 | 13.686 | 7.525  | 32.854 | 1.00 | 0.00 |
| H           |    |     |     |        |        |        |      |      |
| HETATM10682 | H3 | PRP | 738 | 12.767 | 6.181  | 33.499 | 1.00 | 0.00 |
| H           |    |     |     |        |        |        |      |      |
| HETATM10683 | C2 | PRP | 738 | 13.521 | 5.880  | 31.460 | 1.00 | 0.00 |
| C           |    |     |     |        |        |        |      |      |
| HETATM10684 | H4 | PRP | 738 | 13.750 | 6.496  | 30.590 | 1.00 | 0.00 |
| H           |    |     |     |        |        |        |      |      |
| HETATM10685 | O2 | PRP | 738 | 12.546 | 4.863  | 31.083 | 1.00 | 0.00 |
| O           |    |     |     |        |        |        |      |      |
| HETATM10686 | H5 | PRP | 738 | 12.376 | 4.343  | 31.872 | 1.00 | 0.00 |
| H           |    |     |     |        |        |        |      |      |
| HETATM10687 | C3 | PRP | 738 | 14.822 | 5.176  | 31.964 | 1.00 | 0.00 |
| C           |    |     |     |        |        |        |      |      |
| HETATM10688 | H6 | PRP | 738 | 14.544 | 4.449  | 32.727 | 1.00 | 0.00 |
| H           |    |     |     |        |        |        |      |      |
| HETATM10689 | H7 | PRP | 738 | 15.199 | 4.569  | 31.142 | 1.00 | 0.00 |
| H           |    |     |     |        |        |        |      |      |
| HETATM10690 | H8 | PRP | 738 | 15.586 | 5.875  | 32.306 | 1.00 | 0.00 |
| H           |    |     |     |        |        |        |      |      |
| HETATM10691 | O1 | PRP | 739 | 53.968 | 10.679 | 24.348 | 1.00 | 0.00 |
| O           |    |     |     |        |        |        |      |      |
| HETATM10692 | H1 | PRP | 739 | 53.796 | 11.535 | 24.748 | 1.00 | 0.00 |
| H           |    |     |     |        |        |        |      |      |
| HETATM10693 | C1 | PRP | 739 | 54.185 | 9.765  | 25.389 | 1.00 | 0.00 |
| C           |    |     |     |        |        |        |      |      |
| HETATM10694 | H2 | PRP | 739 | 54.841 | 9.030  | 24.923 | 1.00 | 0.00 |
| H           |    |     |     |        |        |        |      |      |
| HETATM10695 | H3 | PRP | 739 | 54.664 | 10.300 | 26.209 | 1.00 | 0.00 |
| H           |    |     |     |        |        |        |      |      |

|             |    |     |     |        |        |        |      |      |
|-------------|----|-----|-----|--------|--------|--------|------|------|
| HETATM10696 | C2 | PRP | 739 | 52.912 | 9.198  | 26.017 | 1.00 | 0.00 |
| C           |    |     |     |        |        |        |      |      |
| HETATM10697 | H4 | PRP | 739 | 53.184 | 8.439  | 26.751 | 1.00 | 0.00 |
| H           |    |     |     |        |        |        |      |      |
| HETATM10698 | O2 | PRP | 739 | 52.159 | 8.698  | 24.934 | 1.00 | 0.00 |
| O           |    |     |     |        |        |        |      |      |
| HETATM10699 | H5 | PRP | 739 | 51.414 | 8.265  | 25.358 | 1.00 | 0.00 |
| H           |    |     |     |        |        |        |      |      |
| HETATM10700 | C3 | PRP | 739 | 52.132 | 10.241 | 26.859 | 1.00 | 0.00 |
| C           |    |     |     |        |        |        |      |      |
| HETATM10701 | H6 | PRP | 739 | 51.666 | 11.009 | 26.242 | 1.00 | 0.00 |
| H           |    |     |     |        |        |        |      |      |
| HETATM10702 | H7 | PRP | 739 | 51.441 | 9.733  | 27.531 | 1.00 | 0.00 |
| H           |    |     |     |        |        |        |      |      |
| HETATM10703 | H8 | PRP | 739 | 52.836 | 10.733 | 27.531 | 1.00 | 0.00 |
| H           |    |     |     |        |        |        |      |      |
| HETATM10704 | O1 | PRP | 740 | 43.420 | 32.345 | 14.719 | 1.00 | 0.00 |
| O           |    |     |     |        |        |        |      |      |
| HETATM10705 | H1 | PRP | 740 | 43.112 | 32.725 | 13.893 | 1.00 | 0.00 |
| H           |    |     |     |        |        |        |      |      |
| HETATM10706 | C1 | PRP | 740 | 43.042 | 30.967 | 14.610 | 1.00 | 0.00 |
| C           |    |     |     |        |        |        |      |      |
| HETATM10707 | H2 | PRP | 740 | 42.022 | 30.839 | 14.973 | 1.00 | 0.00 |
| H           |    |     |     |        |        |        |      |      |
| HETATM10708 | H3 | PRP | 740 | 43.131 | 30.600 | 13.588 | 1.00 | 0.00 |
| H           |    |     |     |        |        |        |      |      |
| HETATM10709 | C2 | PRP | 740 | 44.104 | 30.142 | 15.318 | 1.00 | 0.00 |
| C           |    |     |     |        |        |        |      |      |
| HETATM10710 | H4 | PRP | 740 | 43.978 | 30.471 | 16.349 | 1.00 | 0.00 |
| H           |    |     |     |        |        |        |      |      |
| HETATM10711 | O2 | PRP | 740 | 45.461 | 30.341 | 14.854 | 1.00 | 0.00 |
| O           |    |     |     |        |        |        |      |      |
| HETATM10712 | H5 | PRP | 740 | 45.651 | 31.278 | 14.775 | 1.00 | 0.00 |
| H           |    |     |     |        |        |        |      |      |
| HETATM10713 | C3 | PRP | 740 | 43.772 | 28.640 | 15.131 | 1.00 | 0.00 |
| C           |    |     |     |        |        |        |      |      |
| HETATM10714 | H6 | PRP | 740 | 42.739 | 28.497 | 15.450 | 1.00 | 0.00 |
| H           |    |     |     |        |        |        |      |      |
| HETATM10715 | H7 | PRP | 740 | 43.842 | 28.292 | 14.101 | 1.00 | 0.00 |
| H           |    |     |     |        |        |        |      |      |
| HETATM10716 | H8 | PRP | 740 | 44.509 | 28.168 | 15.781 | 1.00 | 0.00 |
| H           |    |     |     |        |        |        |      |      |
| HETATM10717 | O1 | PRP | 741 | 37.190 | 27.229 | 1.459  | 1.00 | 0.00 |
| O           |    |     |     |        |        |        |      |      |
| HETATM10718 | H1 | PRP | 741 | 36.282 | 27.262 | 1.148  | 1.00 | 0.00 |
| H           |    |     |     |        |        |        |      |      |
| HETATM10719 | C1 | PRP | 741 | 37.077 | 27.944 | 2.654  | 1.00 | 0.00 |
| C           |    |     |     |        |        |        |      |      |
| HETATM10720 | H2 | PRP | 741 | 37.673 | 27.409 | 3.393  | 1.00 | 0.00 |
| H           |    |     |     |        |        |        |      |      |
| HETATM10721 | H3 | PRP | 741 | 37.584 | 28.907 | 2.586  | 1.00 | 0.00 |
| H           |    |     |     |        |        |        |      |      |
| HETATM10722 | C2 | PRP | 741 | 35.593 | 28.054 | 3.096  | 1.00 | 0.00 |
| C           |    |     |     |        |        |        |      |      |
| HETATM10723 | H4 | PRP | 741 | 35.108 | 27.084 | 2.988  | 1.00 | 0.00 |
| H           |    |     |     |        |        |        |      |      |

|             |    |     |     |        |        |        |      |      |
|-------------|----|-----|-----|--------|--------|--------|------|------|
| HETATM10724 | O2 | PRP | 741 | 34.987 | 28.979 | 2.284  | 1.00 | 0.00 |
| O           |    |     |     |        |        |        |      |      |
| HETATM10725 | H5 | PRP | 741 | 34.043 | 28.852 | 2.396  | 1.00 | 0.00 |
| H           |    |     |     |        |        |        |      |      |
| HETATM10726 | C3 | PRP | 741 | 35.523 | 28.553 | 4.539  | 1.00 | 0.00 |
| C           |    |     |     |        |        |        |      |      |
| HETATM10727 | H6 | PRP | 741 | 36.103 | 27.941 | 5.230  | 1.00 | 0.00 |
| H           |    |     |     |        |        |        |      |      |
| HETATM10728 | H7 | PRP | 741 | 35.877 | 29.584 | 4.515  | 1.00 | 0.00 |
| H           |    |     |     |        |        |        |      |      |
| HETATM10729 | H8 | PRP | 741 | 34.485 | 28.525 | 4.872  | 1.00 | 0.00 |
| H           |    |     |     |        |        |        |      |      |
| HETATM10730 | O1 | PRP | 742 | 36.789 | 37.707 | 22.040 | 1.00 | 0.00 |
| O           |    |     |     |        |        |        |      |      |
| HETATM10731 | H1 | PRP | 742 | 37.353 | 38.356 | 21.613 | 1.00 | 0.00 |
| H           |    |     |     |        |        |        |      |      |
| HETATM10732 | C1 | PRP | 742 | 36.766 | 36.607 | 21.161 | 1.00 | 0.00 |
| C           |    |     |     |        |        |        |      |      |
| HETATM10733 | H2 | PRP | 742 | 36.327 | 35.798 | 21.744 | 1.00 | 0.00 |
| H           |    |     |     |        |        |        |      |      |
| HETATM10734 | H3 | PRP | 742 | 36.046 | 36.922 | 20.406 | 1.00 | 0.00 |
| H           |    |     |     |        |        |        |      |      |
| HETATM10735 | C2 | PRP | 742 | 38.058 | 36.169 | 20.518 | 1.00 | 0.00 |
| C           |    |     |     |        |        |        |      |      |
| HETATM10736 | H4 | PRP | 742 | 38.934 | 36.230 | 21.163 | 1.00 | 0.00 |
| H           |    |     |     |        |        |        |      |      |
| HETATM10737 | O2 | PRP | 742 | 38.367 | 37.144 | 19.529 | 1.00 | 0.00 |
| O           |    |     |     |        |        |        |      |      |
| HETATM10738 | H5 | PRP | 742 | 39.094 | 36.838 | 18.982 | 1.00 | 0.00 |
| H           |    |     |     |        |        |        |      |      |
| HETATM10739 | C3 | PRP | 742 | 37.844 | 34.833 | 19.827 | 1.00 | 0.00 |
| C           |    |     |     |        |        |        |      |      |
| HETATM10740 | H6 | PRP | 742 | 36.998 | 34.880 | 19.142 | 1.00 | 0.00 |
| H           |    |     |     |        |        |        |      |      |
| HETATM10741 | H7 | PRP | 742 | 38.616 | 34.425 | 19.175 | 1.00 | 0.00 |
| H           |    |     |     |        |        |        |      |      |
| HETATM10742 | H8 | PRP | 742 | 37.432 | 34.102 | 20.523 | 1.00 | 0.00 |
| H           |    |     |     |        |        |        |      |      |
| HETATM10743 | O1 | PRP | 743 | 28.610 | 7.907  | 6.951  | 1.00 | 0.00 |
| O           |    |     |     |        |        |        |      |      |
| HETATM10744 | H1 | PRP | 743 | 29.449 | 7.897  | 7.418  | 1.00 | 0.00 |
| H           |    |     |     |        |        |        |      |      |
| HETATM10745 | C1 | PRP | 743 | 27.533 | 7.605  | 7.871  | 1.00 | 0.00 |
| C           |    |     |     |        |        |        |      |      |
| HETATM10746 | H2 | PRP | 743 | 26.920 | 8.462  | 8.151  | 1.00 | 0.00 |
| H           |    |     |     |        |        |        |      |      |
| HETATM10747 | H3 | PRP | 743 | 26.840 | 6.880  | 7.444  | 1.00 | 0.00 |
| H           |    |     |     |        |        |        |      |      |
| HETATM10748 | C2 | PRP | 743 | 27.952 | 6.882  | 9.167  | 1.00 | 0.00 |
| C           |    |     |     |        |        |        |      |      |
| HETATM10749 | H4 | PRP | 743 | 28.539 | 7.590  | 9.752  | 1.00 | 0.00 |
| H           |    |     |     |        |        |        |      |      |
| HETATM10750 | O2 | PRP | 743 | 28.708 | 5.746  | 8.873  | 1.00 | 0.00 |
| O           |    |     |     |        |        |        |      |      |
| HETATM10751 | H5 | PRP | 743 | 28.428 | 4.955  | 9.340  | 1.00 | 0.00 |
| H           |    |     |     |        |        |        |      |      |

|             |    |     |     |        |        |        |      |      |
|-------------|----|-----|-----|--------|--------|--------|------|------|
| HETATM10752 | C3 | PRP | 743 | 26.769 | 6.387  | 10.069 | 1.00 | 0.00 |
| C           |    |     |     |        |        |        |      |      |
| HETATM10753 | H6 | PRP | 743 | 26.100 | 7.232  | 10.228 | 1.00 | 0.00 |
| H           |    |     |     |        |        |        |      |      |
| HETATM10754 | H7 | PRP | 743 | 26.194 | 5.612  | 9.564  | 1.00 | 0.00 |
| H           |    |     |     |        |        |        |      |      |
| HETATM10755 | H8 | PRP | 743 | 27.151 | 5.993  | 11.012 | 1.00 | 0.00 |
| H           |    |     |     |        |        |        |      |      |
| HETATM10756 | O1 | PRP | 744 | 50.163 | 14.794 | 25.259 | 1.00 | 0.00 |
| O           |    |     |     |        |        |        |      |      |
| HETATM10757 | H1 | PRP | 744 | 50.001 | 14.028 | 25.815 | 1.00 | 0.00 |
| H           |    |     |     |        |        |        |      |      |
| HETATM10758 | C1 | PRP | 744 | 49.780 | 15.986 | 25.975 | 1.00 | 0.00 |
| C           |    |     |     |        |        |        |      |      |
| HETATM10759 | H2 | PRP | 744 | 48.805 | 15.782 | 26.418 | 1.00 | 0.00 |
| H           |    |     |     |        |        |        |      |      |
| HETATM10760 | H3 | PRP | 744 | 50.499 | 16.286 | 26.738 | 1.00 | 0.00 |
| H           |    |     |     |        |        |        |      |      |
| HETATM10761 | C2 | PRP | 744 | 49.784 | 17.113 | 24.943 | 1.00 | 0.00 |
| C           |    |     |     |        |        |        |      |      |
| HETATM10762 | H4 | PRP | 744 | 49.536 | 18.067 | 25.410 | 1.00 | 0.00 |
| H           |    |     |     |        |        |        |      |      |
| HETATM10763 | O2 | PRP | 744 | 48.765 | 16.780 | 23.910 | 1.00 | 0.00 |
| O           |    |     |     |        |        |        |      |      |
| HETATM10764 | H5 | PRP | 744 | 48.930 | 15.834 | 23.896 | 1.00 | 0.00 |
| H           |    |     |     |        |        |        |      |      |
| HETATM10765 | C3 | PRP | 744 | 51.062 | 17.280 | 24.110 | 1.00 | 0.00 |
| C           |    |     |     |        |        |        |      |      |
| HETATM10766 | H6 | PRP | 744 | 51.999 | 17.283 | 24.667 | 1.00 | 0.00 |
| H           |    |     |     |        |        |        |      |      |
| HETATM10767 | H7 | PRP | 744 | 51.166 | 16.478 | 23.380 | 1.00 | 0.00 |
| H           |    |     |     |        |        |        |      |      |
| HETATM10768 | H8 | PRP | 744 | 50.933 | 18.201 | 23.543 | 1.00 | 0.00 |
| H           |    |     |     |        |        |        |      |      |
| HETATM10769 | O1 | PRP | 745 | 45.303 | 6.055  | 24.201 | 1.00 | 0.00 |
| O           |    |     |     |        |        |        |      |      |
| HETATM10770 | H1 | PRP | 745 | 45.529 | 5.442  | 23.498 | 1.00 | 0.00 |
| H           |    |     |     |        |        |        |      |      |
| HETATM10771 | C1 | PRP | 745 | 44.240 | 5.454  | 24.907 | 1.00 | 0.00 |
| C           |    |     |     |        |        |        |      |      |
| HETATM10772 | H2 | PRP | 745 | 44.721 | 4.763  | 25.600 | 1.00 | 0.00 |
| H           |    |     |     |        |        |        |      |      |
| HETATM10773 | H3 | PRP | 745 | 43.734 | 6.271  | 25.421 | 1.00 | 0.00 |
| H           |    |     |     |        |        |        |      |      |
| HETATM10774 | C2 | PRP | 745 | 43.333 | 4.686  | 23.948 | 1.00 | 0.00 |
| C           |    |     |     |        |        |        |      |      |
| HETATM10775 | H4 | PRP | 745 | 42.603 | 4.125  | 24.531 | 1.00 | 0.00 |
| H           |    |     |     |        |        |        |      |      |
| HETATM10776 | O2 | PRP | 745 | 44.051 | 3.606  | 23.315 | 1.00 | 0.00 |
| O           |    |     |     |        |        |        |      |      |
| HETATM10777 | H5 | PRP | 745 | 43.469 | 3.001  | 22.847 | 1.00 | 0.00 |
| H           |    |     |     |        |        |        |      |      |
| HETATM10778 | C3 | PRP | 745 | 42.507 | 5.495  | 22.927 | 1.00 | 0.00 |
| C           |    |     |     |        |        |        |      |      |
| HETATM10779 | H6 | PRP | 745 | 42.162 | 6.383  | 23.457 | 1.00 | 0.00 |
| H           |    |     |     |        |        |        |      |      |

|             |    |     |     |        |        |        |      |      |
|-------------|----|-----|-----|--------|--------|--------|------|------|
| HETATM10780 | H7 | PRP | 745 | 43.192 | 5.985  | 22.235 | 1.00 | 0.00 |
| H           |    |     |     |        |        |        |      |      |
| HETATM10781 | H8 | PRP | 745 | 41.780 | 4.869  | 22.409 | 1.00 | 0.00 |
| H           |    |     |     |        |        |        |      |      |
| HETATM10782 | O1 | PRP | 746 | 38.506 | 11.591 | 12.762 | 1.00 | 0.00 |
| O           |    |     |     |        |        |        |      |      |
| HETATM10783 | H1 | PRP | 746 | 38.482 | 12.321 | 12.138 | 1.00 | 0.00 |
| H           |    |     |     |        |        |        |      |      |
| HETATM10784 | C1 | PRP | 746 | 37.699 | 11.837 | 13.921 | 1.00 | 0.00 |
| C           |    |     |     |        |        |        |      |      |
| HETATM10785 | H2 | PRP | 746 | 37.573 | 12.891 | 14.173 | 1.00 | 0.00 |
| H           |    |     |     |        |        |        |      |      |
| HETATM10786 | H3 | PRP | 746 | 36.695 | 11.426 | 13.815 | 1.00 | 0.00 |
| H           |    |     |     |        |        |        |      |      |
| HETATM10787 | C2 | PRP | 746 | 38.403 | 11.148 | 15.110 | 1.00 | 0.00 |
| C           |    |     |     |        |        |        |      |      |
| HETATM10788 | H4 | PRP | 746 | 37.938 | 11.556 | 16.007 | 1.00 | 0.00 |
| H           |    |     |     |        |        |        |      |      |
| HETATM10789 | O2 | PRP | 746 | 39.815 | 11.297 | 15.016 | 1.00 | 0.00 |
| O           |    |     |     |        |        |        |      |      |
| HETATM10790 | H5 | PRP | 746 | 39.973 | 11.310 | 14.069 | 1.00 | 0.00 |
| H           |    |     |     |        |        |        |      |      |
| HETATM10791 | C3 | PRP | 746 | 38.129 | 9.661  | 15.202 | 1.00 | 0.00 |
| C           |    |     |     |        |        |        |      |      |
| HETATM10792 | H6 | PRP | 746 | 38.477 | 9.296  | 14.236 | 1.00 | 0.00 |
| H           |    |     |     |        |        |        |      |      |
| HETATM10793 | H7 | PRP | 746 | 38.689 | 9.215  | 16.024 | 1.00 | 0.00 |
| H           |    |     |     |        |        |        |      |      |
| HETATM10794 | H8 | PRP | 746 | 37.079 | 9.428  | 15.382 | 1.00 | 0.00 |
| H           |    |     |     |        |        |        |      |      |
| HETATM10795 | O1 | PRP | 747 | 36.695 | 26.552 | 8.078  | 1.00 | 0.00 |
| O           |    |     |     |        |        |        |      |      |
| HETATM10796 | H1 | PRP | 747 | 35.746 | 26.420 | 8.131  | 1.00 | 0.00 |
| H           |    |     |     |        |        |        |      |      |
| HETATM10797 | C1 | PRP | 747 | 36.898 | 27.876 | 8.311  | 1.00 | 0.00 |
| C           |    |     |     |        |        |        |      |      |
| HETATM10798 | H2 | PRP | 747 | 37.849 | 28.193 | 7.883  | 1.00 | 0.00 |
| H           |    |     |     |        |        |        |      |      |
| HETATM10799 | H3 | PRP | 747 | 36.019 | 28.470 | 8.060  | 1.00 | 0.00 |
| H           |    |     |     |        |        |        |      |      |
| HETATM10800 | C2 | PRP | 747 | 36.987 | 27.961 | 9.801  | 1.00 | 0.00 |
| C           |    |     |     |        |        |        |      |      |
| HETATM10801 | H4 | PRP | 747 | 37.827 | 27.326 | 10.083 | 1.00 | 0.00 |
| H           |    |     |     |        |        |        |      |      |
| HETATM10802 | O2 | PRP | 747 | 35.873 | 27.478 | 10.521 | 1.00 | 0.00 |
| O           |    |     |     |        |        |        |      |      |
| HETATM10803 | H5 | PRP | 747 | 35.095 | 27.553 | 9.963  | 1.00 | 0.00 |
| H           |    |     |     |        |        |        |      |      |
| HETATM10804 | C3 | PRP | 747 | 37.284 | 29.438 | 10.060 | 1.00 | 0.00 |
| C           |    |     |     |        |        |        |      |      |
| HETATM10805 | H6 | PRP | 747 | 36.448 | 30.033 | 9.692  | 1.00 | 0.00 |
| H           |    |     |     |        |        |        |      |      |
| HETATM10806 | H7 | PRP | 747 | 37.225 | 29.591 | 11.138 | 1.00 | 0.00 |
| H           |    |     |     |        |        |        |      |      |
| HETATM10807 | H8 | PRP | 747 | 38.223 | 29.715 | 9.582  | 1.00 | 0.00 |
| H           |    |     |     |        |        |        |      |      |

|             |    |     |     |        |        |        |      |      |
|-------------|----|-----|-----|--------|--------|--------|------|------|
| HETATM10808 | O1 | PRP | 748 | 17.854 | -2.017 | 9.797  | 1.00 | 0.00 |
| O           |    |     |     |        |        |        |      |      |
| HETATM10809 | H1 | PRP | 748 | 18.332 | -1.439 | 10.396 | 1.00 | 0.00 |
| H           |    |     |     |        |        |        |      |      |
| HETATM10810 | C1 | PRP | 748 | 18.707 | -2.946 | 9.333  | 1.00 | 0.00 |
| C           |    |     |     |        |        |        |      |      |
| HETATM10811 | H2 | PRP | 748 | 18.087 | -3.691 | 8.833  | 1.00 | 0.00 |
| H           |    |     |     |        |        |        |      |      |
| HETATM10812 | H3 | PRP | 748 | 19.525 | -2.637 | 8.682  | 1.00 | 0.00 |
| H           |    |     |     |        |        |        |      |      |
| HETATM10813 | C2 | PRP | 748 | 19.307 | -3.728 | 10.567 | 1.00 | 0.00 |
| C           |    |     |     |        |        |        |      |      |
| HETATM10814 | H4 | PRP | 748 | 20.050 | -4.377 | 10.104 | 1.00 | 0.00 |
| H           |    |     |     |        |        |        |      |      |
| HETATM10815 | O2 | PRP | 748 | 18.369 | -4.340 | 11.345 | 1.00 | 0.00 |
| O           |    |     |     |        |        |        |      |      |
| HETATM10816 | H5 | PRP | 748 | 17.879 | -5.055 | 10.932 | 1.00 | 0.00 |
| H           |    |     |     |        |        |        |      |      |
| HETATM10817 | C3 | PRP | 748 | 20.107 | -2.739 | 11.431 | 1.00 | 0.00 |
| C           |    |     |     |        |        |        |      |      |
| HETATM10818 | H6 | PRP | 748 | 19.679 | -1.785 | 11.739 | 1.00 | 0.00 |
| H           |    |     |     |        |        |        |      |      |
| HETATM10819 | H7 | PRP | 748 | 20.382 | -3.279 | 12.337 | 1.00 | 0.00 |
| H           |    |     |     |        |        |        |      |      |
| HETATM10820 | H8 | PRP | 748 | 21.123 | -2.653 | 11.048 | 1.00 | 0.00 |
| H           |    |     |     |        |        |        |      |      |
| HETATM10821 | O1 | PRP | 749 | 16.678 | 12.127 | 21.540 | 1.00 | 0.00 |
| O           |    |     |     |        |        |        |      |      |
| HETATM10822 | H1 | PRP | 749 | 15.977 | 12.087 | 22.195 | 1.00 | 0.00 |
| H           |    |     |     |        |        |        |      |      |
| HETATM10823 | C1 | PRP | 749 | 17.946 | 12.392 | 22.154 | 1.00 | 0.00 |
| C           |    |     |     |        |        |        |      |      |
| HETATM10824 | H2 | PRP | 749 | 17.947 | 13.228 | 22.854 | 1.00 | 0.00 |
| H           |    |     |     |        |        |        |      |      |
| HETATM10825 | H3 | PRP | 749 | 18.245 | 11.525 | 22.743 | 1.00 | 0.00 |
| H           |    |     |     |        |        |        |      |      |
| HETATM10826 | C2 | PRP | 749 | 18.957 | 12.782 | 21.001 | 1.00 | 0.00 |
| C           |    |     |     |        |        |        |      |      |
| HETATM10827 | H4 | PRP | 749 | 19.966 | 12.797 | 21.413 | 1.00 | 0.00 |
| H           |    |     |     |        |        |        |      |      |
| HETATM10828 | O2 | PRP | 749 | 18.704 | 14.118 | 20.545 | 1.00 | 0.00 |
| O           |    |     |     |        |        |        |      |      |
| HETATM10829 | H5 | PRP | 749 | 19.577 | 14.505 | 20.444 | 1.00 | 0.00 |
| H           |    |     |     |        |        |        |      |      |
| HETATM10830 | C3 | PRP | 749 | 18.973 | 11.915 | 19.744 | 1.00 | 0.00 |
| C           |    |     |     |        |        |        |      |      |
| HETATM10831 | H6 | PRP | 749 | 19.927 | 11.989 | 19.221 | 1.00 | 0.00 |
| H           |    |     |     |        |        |        |      |      |
| HETATM10832 | H7 | PRP | 749 | 18.887 | 10.885 | 20.091 | 1.00 | 0.00 |
| H           |    |     |     |        |        |        |      |      |
| HETATM10833 | H8 | PRP | 749 | 18.052 | 12.001 | 19.167 | 1.00 | 0.00 |
| H           |    |     |     |        |        |        |      |      |
| HETATM10834 | O1 | PRP | 750 | 29.028 | 8.365  | 19.927 | 1.00 | 0.00 |
| O           |    |     |     |        |        |        |      |      |
| HETATM10835 | H1 | PRP | 750 | 28.838 | 7.464  | 19.657 | 1.00 | 0.00 |
| H           |    |     |     |        |        |        |      |      |

|             |    |     |     |        |        |        |      |      |
|-------------|----|-----|-----|--------|--------|--------|------|------|
| HETATM10836 | C1 | PRP | 750 | 30.374 | 8.708  | 19.824 | 1.00 | 0.00 |
| C           |    |     |     |        |        |        |      |      |
| HETATM10837 | H2 | PRP | 750 | 30.511 | 9.604  | 20.430 | 1.00 | 0.00 |
| H           |    |     |     |        |        |        |      |      |
| HETATM10838 | H3 | PRP | 750 | 30.938 | 7.878  | 20.250 | 1.00 | 0.00 |
| H           |    |     |     |        |        |        |      |      |
| HETATM10839 | C2 | PRP | 750 | 30.826 | 9.085  | 18.444 | 1.00 | 0.00 |
| C           |    |     |     |        |        |        |      |      |
| HETATM10840 | H4 | PRP | 750 | 30.159 | 9.713  | 17.853 | 1.00 | 0.00 |
| H           |    |     |     |        |        |        |      |      |
| HETATM10841 | O2 | PRP | 750 | 31.000 | 7.866  | 17.758 | 1.00 | 0.00 |
| O           |    |     |     |        |        |        |      |      |
| HETATM10842 | H5 | PRP | 750 | 31.152 | 7.179  | 18.411 | 1.00 | 0.00 |
| H           |    |     |     |        |        |        |      |      |
| HETATM10843 | C3 | PRP | 750 | 32.148 | 9.874  | 18.516 | 1.00 | 0.00 |
| C           |    |     |     |        |        |        |      |      |
| HETATM10844 | H6 | PRP | 750 | 32.038 | 10.957 | 18.576 | 1.00 | 0.00 |
| H           |    |     |     |        |        |        |      |      |
| HETATM10845 | H7 | PRP | 750 | 32.762 | 9.598  | 19.373 | 1.00 | 0.00 |
| H           |    |     |     |        |        |        |      |      |
| HETATM10846 | H8 | PRP | 750 | 32.599 | 9.588  | 17.566 | 1.00 | 0.00 |
| H           |    |     |     |        |        |        |      |      |
| HETATM10847 | O1 | PRP | 751 | 31.140 | 20.909 | 15.000 | 1.00 | 0.00 |
| O           |    |     |     |        |        |        |      |      |
| HETATM10848 | H1 | PRP | 751 | 30.549 | 20.156 | 15.074 | 1.00 | 0.00 |
| H           |    |     |     |        |        |        |      |      |
| HETATM10849 | C1 | PRP | 751 | 30.876 | 21.735 | 16.149 | 1.00 | 0.00 |
| C           |    |     |     |        |        |        |      |      |
| HETATM10850 | H2 | PRP | 751 | 31.548 | 22.591 | 16.204 | 1.00 | 0.00 |
| H           |    |     |     |        |        |        |      |      |
| HETATM10851 | H3 | PRP | 751 | 29.876 | 22.162 | 16.076 | 1.00 | 0.00 |
| H           |    |     |     |        |        |        |      |      |
| HETATM10852 | C2 | PRP | 751 | 30.899 | 20.846 | 17.420 | 1.00 | 0.00 |
| C           |    |     |     |        |        |        |      |      |
| HETATM10853 | H4 | PRP | 751 | 31.801 | 20.241 | 17.518 | 1.00 | 0.00 |
| H           |    |     |     |        |        |        |      |      |
| HETATM10854 | O2 | PRP | 751 | 29.689 | 20.122 | 17.424 | 1.00 | 0.00 |
| O           |    |     |     |        |        |        |      |      |
| HETATM10855 | H5 | PRP | 751 | 29.834 | 19.320 | 16.917 | 1.00 | 0.00 |
| H           |    |     |     |        |        |        |      |      |
| HETATM10856 | C3 | PRP | 751 | 31.025 | 21.820 | 18.603 | 1.00 | 0.00 |
| C           |    |     |     |        |        |        |      |      |
| HETATM10857 | H6 | PRP | 751 | 30.341 | 22.667 | 18.552 | 1.00 | 0.00 |
| H           |    |     |     |        |        |        |      |      |
| HETATM10858 | H7 | PRP | 751 | 30.836 | 21.295 | 19.539 | 1.00 | 0.00 |
| H           |    |     |     |        |        |        |      |      |
| HETATM10859 | H8 | PRP | 751 | 32.043 | 22.200 | 18.691 | 1.00 | 0.00 |
| H           |    |     |     |        |        |        |      |      |
| HETATM10860 | O1 | PRP | 752 | 33.626 | 14.985 | 5.335  | 1.00 | 0.00 |
| O           |    |     |     |        |        |        |      |      |
| HETATM10861 | H1 | PRP | 752 | 34.076 | 14.571 | 4.595  | 1.00 | 0.00 |
| H           |    |     |     |        |        |        |      |      |
| HETATM10862 | C1 | PRP | 752 | 33.316 | 13.866 | 6.142  | 1.00 | 0.00 |
| C           |    |     |     |        |        |        |      |      |
| HETATM10863 | H2 | PRP | 752 | 32.805 | 14.072 | 7.082  | 1.00 | 0.00 |
| H           |    |     |     |        |        |        |      |      |

|             |    |     |     |        |        |        |      |      |
|-------------|----|-----|-----|--------|--------|--------|------|------|
| HETATM10864 | H3 | PRP | 752 | 32.736 | 13.184 | 5.520  | 1.00 | 0.00 |
| H           |    |     |     |        |        |        |      |      |
| HETATM10865 | C2 | PRP | 752 | 34.560 | 12.947 | 6.374  | 1.00 | 0.00 |
| C           |    |     |     |        |        |        |      |      |
| HETATM10866 | H4 | PRP | 752 | 35.260 | 13.578 | 6.921  | 1.00 | 0.00 |
| H           |    |     |     |        |        |        |      |      |
| HETATM10867 | O2 | PRP | 752 | 35.201 | 12.692 | 5.116  | 1.00 | 0.00 |
| O           |    |     |     |        |        |        |      |      |
| HETATM10868 | H5 | PRP | 752 | 36.155 | 12.695 | 5.222  | 1.00 | 0.00 |
| H           |    |     |     |        |        |        |      |      |
| HETATM10869 | C3 | PRP | 752 | 34.332 | 11.683 | 7.067  | 1.00 | 0.00 |
| C           |    |     |     |        |        |        |      |      |
| HETATM10870 | H6 | PRP | 752 | 33.949 | 11.872 | 8.070  | 1.00 | 0.00 |
| H           |    |     |     |        |        |        |      |      |
| HETATM10871 | H7 | PRP | 752 | 33.682 | 11.108 | 6.408  | 1.00 | 0.00 |
| H           |    |     |     |        |        |        |      |      |
| HETATM10872 | H8 | PRP | 752 | 35.271 | 11.171 | 7.279  | 1.00 | 0.00 |
| H           |    |     |     |        |        |        |      |      |
| HETATM10873 | O1 | PRP | 753 | 35.642 | 25.273 | 13.464 | 1.00 | 0.00 |
| O           |    |     |     |        |        |        |      |      |
| HETATM10874 | H1 | PRP | 753 | 36.356 | 25.694 | 13.949 | 1.00 | 0.00 |
| H           |    |     |     |        |        |        |      |      |
| HETATM10875 | C1 | PRP | 753 | 34.852 | 24.488 | 14.307 | 1.00 | 0.00 |
| C           |    |     |     |        |        |        |      |      |
| HETATM10876 | H2 | PRP | 753 | 34.358 | 23.726 | 13.705 | 1.00 | 0.00 |
| H           |    |     |     |        |        |        |      |      |
| HETATM10877 | H3 | PRP | 753 | 35.407 | 23.959 | 15.082 | 1.00 | 0.00 |
| H           |    |     |     |        |        |        |      |      |
| HETATM10878 | C2 | PRP | 753 | 33.852 | 25.408 | 15.047 | 1.00 | 0.00 |
| C           |    |     |     |        |        |        |      |      |
| HETATM10879 | H4 | PRP | 753 | 33.212 | 24.718 | 15.597 | 1.00 | 0.00 |
| H           |    |     |     |        |        |        |      |      |
| HETATM10880 | O2 | PRP | 753 | 33.165 | 25.963 | 14.003 | 1.00 | 0.00 |
| O           |    |     |     |        |        |        |      |      |
| HETATM10881 | H5 | PRP | 753 | 33.823 | 26.065 | 13.312 | 1.00 | 0.00 |
| H           |    |     |     |        |        |        |      |      |
| HETATM10882 | C3 | PRP | 753 | 34.402 | 26.370 | 16.099 | 1.00 | 0.00 |
| C           |    |     |     |        |        |        |      |      |
| HETATM10883 | H6 | PRP | 753 | 33.560 | 26.865 | 16.582 | 1.00 | 0.00 |
| H           |    |     |     |        |        |        |      |      |
| HETATM10884 | H7 | PRP | 753 | 34.980 | 25.860 | 16.869 | 1.00 | 0.00 |
| H           |    |     |     |        |        |        |      |      |
| HETATM10885 | H8 | PRP | 753 | 35.083 | 27.011 | 15.538 | 1.00 | 0.00 |
| H           |    |     |     |        |        |        |      |      |
| HETATM10886 | O1 | PRP | 754 | 28.406 | 28.446 | 9.401  | 1.00 | 0.00 |
| O           |    |     |     |        |        |        |      |      |
| HETATM10887 | H1 | PRP | 754 | 29.288 | 28.315 | 9.046  | 1.00 | 0.00 |
| H           |    |     |     |        |        |        |      |      |
| HETATM10888 | C1 | PRP | 754 | 28.629 | 28.831 | 10.766 | 1.00 | 0.00 |
| C           |    |     |     |        |        |        |      |      |
| HETATM10889 | H2 | PRP | 754 | 29.248 | 28.075 | 11.250 | 1.00 | 0.00 |
| H           |    |     |     |        |        |        |      |      |
| HETATM10890 | H3 | PRP | 754 | 28.970 | 29.866 | 10.810 | 1.00 | 0.00 |
| H           |    |     |     |        |        |        |      |      |
| HETATM10891 | C2 | PRP | 754 | 27.272 | 28.795 | 11.512 | 1.00 | 0.00 |
| C           |    |     |     |        |        |        |      |      |



|             |    |     |     |        |        |        |      |      |
|-------------|----|-----|-----|--------|--------|--------|------|------|
| HETATM10892 | H4 | PRP | 754 | 26.922 | 27.766 | 11.601 | 1.00 | 0.00 |
| H           |    |     |     |        |        |        |      |      |
| HETATM10893 | O2 | PRP | 754 | 26.345 | 29.495 | 10.643 | 1.00 | 0.00 |
| O           |    |     |     |        |        |        |      |      |
| HETATM10894 | H5 | PRP | 754 | 26.476 | 28.945 | 9.867  | 1.00 | 0.00 |
| H           |    |     |     |        |        |        |      |      |
| HETATM10895 | C3 | PRP | 754 | 27.296 | 29.626 | 12.820 | 1.00 | 0.00 |
| C           |    |     |     |        |        |        |      |      |
| HETATM10896 | H6 | PRP | 754 | 27.350 | 28.868 | 13.601 | 1.00 | 0.00 |
| H           |    |     |     |        |        |        |      |      |
| HETATM10897 | H7 | PRP | 754 | 28.186 | 30.256 | 12.819 | 1.00 | 0.00 |
| H           |    |     |     |        |        |        |      |      |
| HETATM10898 | H8 | PRP | 754 | 26.361 | 30.159 | 12.993 | 1.00 | 0.00 |
| H           |    |     |     |        |        |        |      |      |
| HETATM10899 | O1 | PRP | 755 | 23.732 | -2.150 | 20.473 | 1.00 | 0.00 |
| O           |    |     |     |        |        |        |      |      |
| HETATM10900 | H1 | PRP | 755 | 24.658 | -1.905 | 20.539 | 1.00 | 0.00 |
| H           |    |     |     |        |        |        |      |      |
| HETATM10901 | C1 | PRP | 755 | 23.481 | -3.367 | 21.212 | 1.00 | 0.00 |
| C           |    |     |     |        |        |        |      |      |
| HETATM10902 | H2 | PRP | 755 | 22.920 | -3.262 | 22.141 | 1.00 | 0.00 |
| H           |    |     |     |        |        |        |      |      |
| HETATM10903 | H3 | PRP | 755 | 22.959 | -4.058 | 20.551 | 1.00 | 0.00 |
| H           |    |     |     |        |        |        |      |      |
| HETATM10904 | C2 | PRP | 755 | 24.797 | -4.091 | 21.632 | 1.00 | 0.00 |
| C           |    |     |     |        |        |        |      |      |
| HETATM10905 | H4 | PRP | 755 | 24.560 | -5.036 | 22.121 | 1.00 | 0.00 |
| H           |    |     |     |        |        |        |      |      |
| HETATM10906 | O2 | PRP | 755 | 25.533 | -3.269 | 22.558 | 1.00 | 0.00 |
| O           |    |     |     |        |        |        |      |      |
| HETATM10907 | H5 | PRP | 755 | 24.946 | -3.026 | 23.278 | 1.00 | 0.00 |
| H           |    |     |     |        |        |        |      |      |
| HETATM10908 | C3 | PRP | 755 | 25.698 | -4.597 | 20.544 | 1.00 | 0.00 |
| C           |    |     |     |        |        |        |      |      |
| HETATM10909 | H6 | PRP | 755 | 25.121 | -5.040 | 19.732 | 1.00 | 0.00 |
| H           |    |     |     |        |        |        |      |      |
| HETATM10910 | H7 | PRP | 755 | 26.229 | -3.796 | 20.029 | 1.00 | 0.00 |
| H           |    |     |     |        |        |        |      |      |
| HETATM10911 | H8 | PRP | 755 | 26.449 | -5.296 | 20.911 | 1.00 | 0.00 |
| H           |    |     |     |        |        |        |      |      |
| HETATM10912 | O1 | PRP | 756 | 22.123 | 14.579 | 5.411  | 1.00 | 0.00 |
| O           |    |     |     |        |        |        |      |      |
| HETATM10913 | H1 | PRP | 756 | 22.958 | 14.172 | 5.169  | 1.00 | 0.00 |
| H           |    |     |     |        |        |        |      |      |
| HETATM10914 | C1 | PRP | 756 | 21.788 | 15.317 | 4.226  | 1.00 | 0.00 |
| C           |    |     |     |        |        |        |      |      |
| HETATM10915 | H2 | PRP | 756 | 22.228 | 16.312 | 4.288  | 1.00 | 0.00 |
| H           |    |     |     |        |        |        |      |      |
| HETATM10916 | H3 | PRP | 756 | 22.179 | 14.896 | 3.300  | 1.00 | 0.00 |
| H           |    |     |     |        |        |        |      |      |
| HETATM10917 | C2 | PRP | 756 | 20.266 | 15.481 | 4.030  | 1.00 | 0.00 |
| C           |    |     |     |        |        |        |      |      |
| HETATM10918 | H4 | PRP | 756 | 19.958 | 15.992 | 4.943  | 1.00 | 0.00 |
| H           |    |     |     |        |        |        |      |      |
| HETATM10919 | O2 | PRP | 756 | 19.593 | 14.218 | 3.914  | 1.00 | 0.00 |
| O           |    |     |     |        |        |        |      |      |

|             |    |     |     |        |        |        |      |      |
|-------------|----|-----|-----|--------|--------|--------|------|------|
| HETATM10920 | H5 | PRP | 756 | 18.883 | 14.372 | 3.286  | 1.00 | 0.00 |
| H           |    |     |     |        |        |        |      |      |
| HETATM10921 | C3 | PRP | 756 | 19.943 | 16.363 | 2.834  | 1.00 | 0.00 |
| C           |    |     |     |        |        |        |      |      |
| HETATM10922 | H6 | PRP | 756 | 20.102 | 17.392 | 3.158  | 1.00 | 0.00 |
| H           |    |     |     |        |        |        |      |      |
| HETATM10923 | H7 | PRP | 756 | 20.623 | 16.155 | 2.008  | 1.00 | 0.00 |
| H           |    |     |     |        |        |        |      |      |
| HETATM10924 | H8 | PRP | 756 | 18.882 | 16.297 | 2.592  | 1.00 | 0.00 |
| H           |    |     |     |        |        |        |      |      |
| HETATM10925 | O1 | PRP | 757 | 23.660 | 8.505  | 13.976 | 1.00 | 0.00 |
| O           |    |     |     |        |        |        |      |      |
| HETATM10926 | H1 | PRP | 757 | 23.492 | 8.071  | 14.816 | 1.00 | 0.00 |
| H           |    |     |     |        |        |        |      |      |
| HETATM10927 | C1 | PRP | 757 | 24.230 | 9.766  | 14.226 | 1.00 | 0.00 |
| C           |    |     |     |        |        |        |      |      |
| HETATM10928 | H2 | PRP | 757 | 23.530 | 10.515 | 14.597 | 1.00 | 0.00 |
| H           |    |     |     |        |        |        |      |      |
| HETATM10929 | H3 | PRP | 757 | 25.046 | 9.734  | 14.947 | 1.00 | 0.00 |
| H           |    |     |     |        |        |        |      |      |
| HETATM10930 | C2 | PRP | 757 | 24.794 | 10.169 | 12.906 | 1.00 | 0.00 |
| C           |    |     |     |        |        |        |      |      |
| HETATM10931 | H4 | PRP | 757 | 24.142 | 10.094 | 12.035 | 1.00 | 0.00 |
| H           |    |     |     |        |        |        |      |      |
| HETATM10932 | O2 | PRP | 757 | 25.873 | 9.267  | 12.495 | 1.00 | 0.00 |
| O           |    |     |     |        |        |        |      |      |
| HETATM10933 | H5 | PRP | 757 | 25.571 | 8.356  | 12.512 | 1.00 | 0.00 |
| H           |    |     |     |        |        |        |      |      |
| HETATM10934 | C3 | PRP | 757 | 25.525 | 11.512 | 13.123 | 1.00 | 0.00 |
| C           |    |     |     |        |        |        |      |      |
| HETATM10935 | H6 | PRP | 757 | 26.080 | 11.858 | 12.252 | 1.00 | 0.00 |
| H           |    |     |     |        |        |        |      |      |
| HETATM10936 | H7 | PRP | 757 | 24.990 | 12.345 | 13.580 | 1.00 | 0.00 |
| H           |    |     |     |        |        |        |      |      |
| HETATM10937 | H8 | PRP | 757 | 26.264 | 11.492 | 13.924 | 1.00 | 0.00 |
| H           |    |     |     |        |        |        |      |      |
| HETATM10938 | O1 | PRP | 758 | 44.214 | 17.768 | 19.495 | 1.00 | 0.00 |
| O           |    |     |     |        |        |        |      |      |
| HETATM10939 | H1 | PRP | 758 | 43.339 | 18.139 | 19.633 | 1.00 | 0.00 |
| H           |    |     |     |        |        |        |      |      |
| HETATM10940 | C1 | PRP | 758 | 44.286 | 16.883 | 20.613 | 1.00 | 0.00 |
| C           |    |     |     |        |        |        |      |      |
| HETATM10941 | H2 | PRP | 758 | 45.347 | 16.690 | 20.773 | 1.00 | 0.00 |
| H           |    |     |     |        |        |        |      |      |
| HETATM10942 | H3 | PRP | 758 | 43.833 | 17.405 | 21.456 | 1.00 | 0.00 |
| H           |    |     |     |        |        |        |      |      |
| HETATM10943 | C2 | PRP | 758 | 43.693 | 15.503 | 20.386 | 1.00 | 0.00 |
| C           |    |     |     |        |        |        |      |      |
| HETATM10944 | H4 | PRP | 758 | 44.125 | 14.904 | 19.584 | 1.00 | 0.00 |
| H           |    |     |     |        |        |        |      |      |
| HETATM10945 | O2 | PRP | 758 | 42.365 | 15.627 | 20.085 | 1.00 | 0.00 |
| O           |    |     |     |        |        |        |      |      |
| HETATM10946 | H5 | PRP | 758 | 42.285 | 16.220 | 19.335 | 1.00 | 0.00 |
| H           |    |     |     |        |        |        |      |      |
| HETATM10947 | C3 | PRP | 758 | 43.720 | 14.714 | 21.712 | 1.00 | 0.00 |
| C           |    |     |     |        |        |        |      |      |

|             |    |     |     |        |        |        |      |      |
|-------------|----|-----|-----|--------|--------|--------|------|------|
| HETATM10948 | H6 | PRP | 758 | 44.740 | 14.398 | 21.930 | 1.00 | 0.00 |
| H           |    |     |     |        |        |        |      |      |
| HETATM10949 | H7 | PRP | 758 | 43.353 | 15.298 | 22.557 | 1.00 | 0.00 |
| H           |    |     |     |        |        |        |      |      |
| HETATM10950 | H8 | PRP | 758 | 43.132 | 13.802 | 21.604 | 1.00 | 0.00 |
| H           |    |     |     |        |        |        |      |      |
| HETATM10951 | O1 | PRP | 759 | 37.245 | 23.855 | 11.635 | 1.00 | 0.00 |
| O           |    |     |     |        |        |        |      |      |
| HETATM10952 | H1 | PRP | 759 | 36.637 | 24.211 | 12.287 | 1.00 | 0.00 |
| H           |    |     |     |        |        |        |      |      |
| HETATM10953 | C1 | PRP | 759 | 38.474 | 24.582 | 11.903 | 1.00 | 0.00 |
| C           |    |     |     |        |        |        |      |      |
| HETATM10954 | H2 | PRP | 759 | 39.137 | 24.479 | 11.044 | 1.00 | 0.00 |
| H           |    |     |     |        |        |        |      |      |
| HETATM10955 | H3 | PRP | 759 | 38.261 | 25.651 | 11.882 | 1.00 | 0.00 |
| H           |    |     |     |        |        |        |      |      |
| HETATM10956 | C2 | PRP | 759 | 39.030 | 24.188 | 13.310 | 1.00 | 0.00 |
| C           |    |     |     |        |        |        |      |      |
| HETATM10957 | H4 | PRP | 759 | 39.341 | 23.144 | 13.340 | 1.00 | 0.00 |
| H           |    |     |     |        |        |        |      |      |
| HETATM10958 | O2 | PRP | 759 | 38.169 | 24.681 | 14.331 | 1.00 | 0.00 |
| O           |    |     |     |        |        |        |      |      |
| HETATM10959 | H5 | PRP | 759 | 38.354 | 24.178 | 15.127 | 1.00 | 0.00 |
| H           |    |     |     |        |        |        |      |      |
| HETATM10960 | C3 | PRP | 759 | 40.362 | 24.857 | 13.387 | 1.00 | 0.00 |
| C           |    |     |     |        |        |        |      |      |
| HETATM10961 | H6 | PRP | 759 | 40.997 | 24.438 | 14.168 | 1.00 | 0.00 |
| H           |    |     |     |        |        |        |      |      |
| HETATM10962 | H7 | PRP | 759 | 40.932 | 24.737 | 12.466 | 1.00 | 0.00 |
| H           |    |     |     |        |        |        |      |      |
| HETATM10963 | H8 | PRP | 759 | 40.262 | 25.937 | 13.493 | 1.00 | 0.00 |
| H           |    |     |     |        |        |        |      |      |
| HETATM10964 | O1 | PRP | 760 | 30.592 | 24.875 | 14.411 | 1.00 | 0.00 |
| O           |    |     |     |        |        |        |      |      |
| HETATM10965 | H1 | PRP | 760 | 31.398 | 25.397 | 14.402 | 1.00 | 0.00 |
| H           |    |     |     |        |        |        |      |      |
| HETATM10966 | C1 | PRP | 760 | 30.237 | 24.309 | 13.184 | 1.00 | 0.00 |
| C           |    |     |     |        |        |        |      |      |
| HETATM10967 | H2 | PRP | 760 | 30.379 | 25.095 | 12.441 | 1.00 | 0.00 |
| H           |    |     |     |        |        |        |      |      |
| HETATM10968 | H3 | PRP | 760 | 30.884 | 23.449 | 13.013 | 1.00 | 0.00 |
| H           |    |     |     |        |        |        |      |      |
| HETATM10969 | C2 | PRP | 760 | 28.750 | 23.892 | 13.063 | 1.00 | 0.00 |
| C           |    |     |     |        |        |        |      |      |
| HETATM10970 | H4 | PRP | 760 | 28.223 | 24.835 | 13.206 | 1.00 | 0.00 |
| H           |    |     |     |        |        |        |      |      |
| HETATM10971 | O2 | PRP | 760 | 28.382 | 23.110 | 14.128 | 1.00 | 0.00 |
| O           |    |     |     |        |        |        |      |      |
| HETATM10972 | H5 | PRP | 760 | 29.170 | 23.269 | 14.653 | 1.00 | 0.00 |
| H           |    |     |     |        |        |        |      |      |
| HETATM10973 | C3 | PRP | 760 | 28.428 | 23.306 | 11.705 | 1.00 | 0.00 |
| C           |    |     |     |        |        |        |      |      |
| HETATM10974 | H6 | PRP | 760 | 27.372 | 23.043 | 11.639 | 1.00 | 0.00 |
| H           |    |     |     |        |        |        |      |      |
| HETATM10975 | H7 | PRP | 760 | 28.622 | 24.049 | 10.931 | 1.00 | 0.00 |
| H           |    |     |     |        |        |        |      |      |

|             |    |     |     |        |        |        |      |      |
|-------------|----|-----|-----|--------|--------|--------|------|------|
| HETATM10976 | H8 | PRP | 760 | 29.016 | 22.404 | 11.534 | 1.00 | 0.00 |
| H           |    |     |     |        |        |        |      |      |
| HETATM10977 | O1 | PRP | 761 | 35.083 | 16.620 | 7.106  | 1.00 | 0.00 |
| O           |    |     |     |        |        |        |      |      |
| HETATM10978 | H1 | PRP | 761 | 34.562 | 16.040 | 6.546  | 1.00 | 0.00 |
| H           |    |     |     |        |        |        |      |      |
| HETATM10979 | C1 | PRP | 761 | 34.535 | 16.910 | 8.410  | 1.00 | 0.00 |
| C           |    |     |     |        |        |        |      |      |
| HETATM10980 | H2 | PRP | 761 | 34.065 | 17.890 | 8.494  | 1.00 | 0.00 |
| H           |    |     |     |        |        |        |      |      |
| HETATM10981 | H3 | PRP | 761 | 33.875 | 16.091 | 8.693  | 1.00 | 0.00 |
| H           |    |     |     |        |        |        |      |      |
| HETATM10982 | C2 | PRP | 761 | 35.698 | 17.111 | 9.385  | 1.00 | 0.00 |
| C           |    |     |     |        |        |        |      |      |
| HETATM10983 | H4 | PRP | 761 | 36.523 | 17.597 | 8.864  | 1.00 | 0.00 |
| H           |    |     |     |        |        |        |      |      |
| HETATM10984 | O2 | PRP | 761 | 36.091 | 15.929 | 10.003 | 1.00 | 0.00 |
| O           |    |     |     |        |        |        |      |      |
| HETATM10985 | H5 | PRP | 761 | 35.986 | 15.932 | 10.957 | 1.00 | 0.00 |
| H           |    |     |     |        |        |        |      |      |
| HETATM10986 | C3 | PRP | 761 | 35.376 | 18.119 | 10.462 | 1.00 | 0.00 |
| C           |    |     |     |        |        |        |      |      |
| HETATM10987 | H6 | PRP | 761 | 36.268 | 18.400 | 11.021 | 1.00 | 0.00 |
| H           |    |     |     |        |        |        |      |      |
| HETATM10988 | H7 | PRP | 761 | 34.945 | 19.018 | 10.023 | 1.00 | 0.00 |
| H           |    |     |     |        |        |        |      |      |
| HETATM10989 | H8 | PRP | 761 | 34.740 | 17.611 | 11.188 | 1.00 | 0.00 |
| H           |    |     |     |        |        |        |      |      |
| HETATM10990 | O1 | PRP | 762 | 10.737 | -1.257 | 12.196 | 1.00 | 0.00 |
| O           |    |     |     |        |        |        |      |      |
| HETATM10991 | H1 | PRP | 762 | 10.691 | -1.949 | 12.860 | 1.00 | 0.00 |
| H           |    |     |     |        |        |        |      |      |
| HETATM10992 | C1 | PRP | 762 | 11.010 | -0.039 | 12.863 | 1.00 | 0.00 |
| C           |    |     |     |        |        |        |      |      |
| HETATM10993 | H2 | PRP | 762 | 11.598 | 0.579  | 12.185 | 1.00 | 0.00 |
| H           |    |     |     |        |        |        |      |      |
| HETATM10994 | H3 | PRP | 762 | 10.069 | 0.484  | 13.037 | 1.00 | 0.00 |
| H           |    |     |     |        |        |        |      |      |
| HETATM10995 | C2 | PRP | 762 | 11.760 | -0.453 | 14.115 | 1.00 | 0.00 |
| C           |    |     |     |        |        |        |      |      |
| HETATM10996 | H4 | PRP | 762 | 12.686 | -0.942 | 13.813 | 1.00 | 0.00 |
| H           |    |     |     |        |        |        |      |      |
| HETATM10997 | O2 | PRP | 762 | 10.991 | -1.258 | 14.969 | 1.00 | 0.00 |
| O           |    |     |     |        |        |        |      |      |
| HETATM10998 | H5 | PRP | 762 | 11.166 | -1.030 | 15.885 | 1.00 | 0.00 |
| H           |    |     |     |        |        |        |      |      |
| HETATM10999 | C3 | PRP | 762 | 12.333 | 0.804  | 14.775 | 1.00 | 0.00 |
| C           |    |     |     |        |        |        |      |      |
| HETATM11000 | H6 | PRP | 762 | 11.584 | 1.492  | 15.168 | 1.00 | 0.00 |
| H           |    |     |     |        |        |        |      |      |
| HETATM11001 | H7 | PRP | 762 | 12.970 | 0.441  | 15.582 | 1.00 | 0.00 |
| H           |    |     |     |        |        |        |      |      |
| HETATM11002 | H8 | PRP | 762 | 12.936 | 1.465  | 14.152 | 1.00 | 0.00 |
| H           |    |     |     |        |        |        |      |      |
| HETATM11003 | O1 | PRP | 763 | 17.752 | 6.618  | 4.718  | 1.00 | 0.00 |
| O           |    |     |     |        |        |        |      |      |

|             |    |     |     |        |        |        |      |      |
|-------------|----|-----|-----|--------|--------|--------|------|------|
| HETATM11004 | H1 | PRP | 763 | 18.196 | 5.800  | 4.953  | 1.00 | 0.00 |
| H           |    |     |     |        |        |        |      |      |
| HETATM11005 | C1 | PRP | 763 | 17.191 | 7.107  | 5.931  | 1.00 | 0.00 |
| C           |    |     |     |        |        |        |      |      |
| HETATM11006 | H2 | PRP | 763 | 16.711 | 8.071  | 5.759  | 1.00 | 0.00 |
| H           |    |     |     |        |        |        |      |      |
| HETATM11007 | H3 | PRP | 763 | 16.474 | 6.394  | 6.337  | 1.00 | 0.00 |
| H           |    |     |     |        |        |        |      |      |
| HETATM11008 | C2 | PRP | 763 | 18.249 | 7.195  | 6.927  | 1.00 | 0.00 |
| C           |    |     |     |        |        |        |      |      |
| HETATM11009 | H4 | PRP | 763 | 19.062 | 7.790  | 6.511  | 1.00 | 0.00 |
| H           |    |     |     |        |        |        |      |      |
| HETATM11010 | O2 | PRP | 763 | 18.893 | 5.970  | 7.308  | 1.00 | 0.00 |
| O           |    |     |     |        |        |        |      |      |
| HETATM11011 | H5 | PRP | 763 | 19.002 | 5.447  | 6.510  | 1.00 | 0.00 |
| H           |    |     |     |        |        |        |      |      |
| HETATM11012 | C3 | PRP | 763 | 17.573 | 7.944  | 8.120  | 1.00 | 0.00 |
| C           |    |     |     |        |        |        |      |      |
| HETATM11013 | H6 | PRP | 763 | 16.865 | 7.249  | 8.572  | 1.00 | 0.00 |
| H           |    |     |     |        |        |        |      |      |
| HETATM11014 | H7 | PRP | 763 | 18.306 | 8.275  | 8.856  | 1.00 | 0.00 |
| H           |    |     |     |        |        |        |      |      |
| HETATM11015 | H8 | PRP | 763 | 17.022 | 8.820  | 7.779  | 1.00 | 0.00 |
| H           |    |     |     |        |        |        |      |      |
| HETATM11016 | O1 | PRP | 764 | 21.356 | 7.477  | -1.727 | 1.00 | 0.00 |
| O           |    |     |     |        |        |        |      |      |
| HETATM11017 | H1 | PRP | 764 | 21.211 | 6.549  | -1.528 | 1.00 | 0.00 |
| H           |    |     |     |        |        |        |      |      |
| HETATM11018 | C1 | PRP | 764 | 22.738 | 7.340  | -1.990 | 1.00 | 0.00 |
| C           |    |     |     |        |        |        |      |      |
| HETATM11019 | H2 | PRP | 764 | 22.960 | 7.058  | -3.019 | 1.00 | 0.00 |
| H           |    |     |     |        |        |        |      |      |
| HETATM11020 | H3 | PRP | 764 | 23.260 | 8.274  | -1.783 | 1.00 | 0.00 |
| H           |    |     |     |        |        |        |      |      |
| HETATM11021 | C2 | PRP | 764 | 23.457 | 6.289  | -1.136 | 1.00 | 0.00 |
| C           |    |     |     |        |        |        |      |      |
| HETATM11022 | H4 | PRP | 764 | 24.484 | 6.197  | -1.487 | 1.00 | 0.00 |
| H           |    |     |     |        |        |        |      |      |
| HETATM11023 | O2 | PRP | 764 | 22.792 | 5.056  | -1.236 | 1.00 | 0.00 |
| O           |    |     |     |        |        |        |      |      |
| HETATM11024 | H5 | PRP | 764 | 23.146 | 4.327  | -0.722 | 1.00 | 0.00 |
| H           |    |     |     |        |        |        |      |      |
| HETATM11025 | C3 | PRP | 764 | 23.530 | 6.652  | 0.393  | 1.00 | 0.00 |
| C           |    |     |     |        |        |        |      |      |
| HETATM11026 | H6 | PRP | 764 | 23.552 | 5.691  | 0.907  | 1.00 | 0.00 |
| H           |    |     |     |        |        |        |      |      |
| HETATM11027 | H7 | PRP | 764 | 24.304 | 7.381  | 0.632  | 1.00 | 0.00 |
| H           |    |     |     |        |        |        |      |      |
| HETATM11028 | H8 | PRP | 764 | 22.532 | 6.977  | 0.688  | 1.00 | 0.00 |
| H           |    |     |     |        |        |        |      |      |
| HETATM11029 | O1 | PRP | 765 | 42.352 | 22.409 | 6.867  | 1.00 | 0.00 |
| O           |    |     |     |        |        |        |      |      |
| HETATM11030 | H1 | PRP | 765 | 41.969 | 23.008 | 6.222  | 1.00 | 0.00 |
| H           |    |     |     |        |        |        |      |      |
| HETATM11031 | C1 | PRP | 765 | 43.297 | 23.056 | 7.706  | 1.00 | 0.00 |
| C           |    |     |     |        |        |        |      |      |

|             |    |     |     |        |        |        |      |      |
|-------------|----|-----|-----|--------|--------|--------|------|------|
| HETATM11032 | H2 | PRP | 765 | 42.862 | 24.006 | 8.017  | 1.00 | 0.00 |
| H           |    |     |     |        |        |        |      |      |
| HETATM11033 | H3 | PRP | 765 | 43.549 | 22.438 | 8.567  | 1.00 | 0.00 |
| H           |    |     |     |        |        |        |      |      |
| HETATM11034 | C2 | PRP | 765 | 44.648 | 23.139 | 6.962  | 1.00 | 0.00 |
| C           |    |     |     |        |        |        |      |      |
| HETATM11035 | H4 | PRP | 765 | 45.419 | 23.732 | 7.456  | 1.00 | 0.00 |
| H           |    |     |     |        |        |        |      |      |
| HETATM11036 | O2 | PRP | 765 | 44.508 | 23.938 | 5.731  | 1.00 | 0.00 |
| O           |    |     |     |        |        |        |      |      |
| HETATM11037 | H5 | PRP | 765 | 44.810 | 23.301 | 5.079  | 1.00 | 0.00 |
| H           |    |     |     |        |        |        |      |      |
| HETATM11038 | C3 | PRP | 765 | 45.237 | 21.843 | 6.479  | 1.00 | 0.00 |
| C           |    |     |     |        |        |        |      |      |
| HETATM11039 | H6 | PRP | 765 | 45.372 | 21.134 | 7.296  | 1.00 | 0.00 |
| H           |    |     |     |        |        |        |      |      |
| HETATM11040 | H7 | PRP | 765 | 44.677 | 21.399 | 5.656  | 1.00 | 0.00 |
| H           |    |     |     |        |        |        |      |      |
| HETATM11041 | H8 | PRP | 765 | 46.146 | 22.064 | 5.918  | 1.00 | 0.00 |
| H           |    |     |     |        |        |        |      |      |
| HETATM11042 | O1 | PRP | 766 | 33.393 | 24.706 | 3.496  | 1.00 | 0.00 |
| O           |    |     |     |        |        |        |      |      |
| HETATM11043 | H1 | PRP | 766 | 32.913 | 23.893 | 3.672  | 1.00 | 0.00 |
| H           |    |     |     |        |        |        |      |      |
| HETATM11044 | C1 | PRP | 766 | 32.672 | 25.799 | 4.064  | 1.00 | 0.00 |
| C           |    |     |     |        |        |        |      |      |
| HETATM11045 | H2 | PRP | 766 | 33.267 | 26.498 | 4.653  | 1.00 | 0.00 |
| H           |    |     |     |        |        |        |      |      |
| HETATM11046 | H3 | PRP | 766 | 32.143 | 26.411 | 3.333  | 1.00 | 0.00 |
| H           |    |     |     |        |        |        |      |      |
| HETATM11047 | C2 | PRP | 766 | 31.613 | 25.102 | 5.001  | 1.00 | 0.00 |
| C           |    |     |     |        |        |        |      |      |
| HETATM11048 | H4 | PRP | 766 | 32.133 | 24.636 | 5.838  | 1.00 | 0.00 |
| H           |    |     |     |        |        |        |      |      |
| HETATM11049 | O2 | PRP | 766 | 30.830 | 24.310 | 4.155  | 1.00 | 0.00 |
| O           |    |     |     |        |        |        |      |      |
| HETATM11050 | H5 | PRP | 766 | 30.328 | 23.653 | 4.643  | 1.00 | 0.00 |
| H           |    |     |     |        |        |        |      |      |
| HETATM11051 | C3 | PRP | 766 | 30.718 | 26.153 | 5.576  | 1.00 | 0.00 |
| C           |    |     |     |        |        |        |      |      |
| HETATM11052 | H6 | PRP | 766 | 31.217 | 26.977 | 6.085  | 1.00 | 0.00 |
| H           |    |     |     |        |        |        |      |      |
| HETATM11053 | H7 | PRP | 766 | 30.174 | 26.546 | 4.718  | 1.00 | 0.00 |
| H           |    |     |     |        |        |        |      |      |
| HETATM11054 | H8 | PRP | 766 | 30.034 | 25.740 | 6.317  | 1.00 | 0.00 |
| H           |    |     |     |        |        |        |      |      |
| HETATM11055 | O1 | PRP | 767 | 54.797 | 26.773 | 11.671 | 1.00 | 0.00 |
| O           |    |     |     |        |        |        |      |      |
| HETATM11056 | H1 | PRP | 767 | 54.637 | 25.912 | 12.066 | 1.00 | 0.00 |
| H           |    |     |     |        |        |        |      |      |
| HETATM11057 | C1 | PRP | 767 | 53.930 | 27.760 | 12.101 | 1.00 | 0.00 |
| C           |    |     |     |        |        |        |      |      |
| HETATM11058 | H2 | PRP | 767 | 52.935 | 27.520 | 11.725 | 1.00 | 0.00 |
| H           |    |     |     |        |        |        |      |      |
| HETATM11059 | H3 | PRP | 767 | 53.969 | 27.790 | 13.189 | 1.00 | 0.00 |
| H           |    |     |     |        |        |        |      |      |

|             |    |     |     |        |        |        |      |      |
|-------------|----|-----|-----|--------|--------|--------|------|------|
| HETATM11060 | C2 | PRP | 767 | 54.355 | 29.082 | 11.570 | 1.00 | 0.00 |
| C           |    |     |     |        |        |        |      |      |
| HETATM11061 | H4 | PRP | 767 | 54.428 | 28.988 | 10.486 | 1.00 | 0.00 |
| H           |    |     |     |        |        |        |      |      |
| HETATM11062 | O2 | PRP | 767 | 55.608 | 29.568 | 12.198 | 1.00 | 0.00 |
| O           |    |     |     |        |        |        |      |      |
| HETATM11063 | H5 | PRP | 767 | 56.423 | 29.092 | 12.026 | 1.00 | 0.00 |
| H           |    |     |     |        |        |        |      |      |
| HETATM11064 | C3 | PRP | 767 | 53.309 | 30.041 | 11.962 | 1.00 | 0.00 |
| C           |    |     |     |        |        |        |      |      |
| HETATM11065 | H6 | PRP | 767 | 52.327 | 29.857 | 11.526 | 1.00 | 0.00 |
| H           |    |     |     |        |        |        |      |      |
| HETATM11066 | H7 | PRP | 767 | 53.298 | 30.065 | 13.051 | 1.00 | 0.00 |
| H           |    |     |     |        |        |        |      |      |
| HETATM11067 | H8 | PRP | 767 | 53.547 | 31.038 | 11.589 | 1.00 | 0.00 |
| H           |    |     |     |        |        |        |      |      |
| HETATM11068 | O1 | PRP | 768 | 27.006 | 12.535 | 16.164 | 1.00 | 0.00 |
| O           |    |     |     |        |        |        |      |      |
| HETATM11069 | H1 | PRP | 768 | 26.410 | 12.334 | 16.889 | 1.00 | 0.00 |
| H           |    |     |     |        |        |        |      |      |
| HETATM11070 | C1 | PRP | 768 | 28.323 | 12.260 | 16.625 | 1.00 | 0.00 |
| C           |    |     |     |        |        |        |      |      |
| HETATM11071 | H2 | PRP | 768 | 28.574 | 12.857 | 17.502 | 1.00 | 0.00 |
| H           |    |     |     |        |        |        |      |      |
| HETATM11072 | H3 | PRP | 768 | 28.375 | 11.202 | 16.881 | 1.00 | 0.00 |
| H           |    |     |     |        |        |        |      |      |
| HETATM11073 | C2 | PRP | 768 | 29.315 | 12.517 | 15.492 | 1.00 | 0.00 |
| C           |    |     |     |        |        |        |      |      |
| HETATM11074 | H4 | PRP | 768 | 29.190 | 13.493 | 15.023 | 1.00 | 0.00 |
| H           |    |     |     |        |        |        |      |      |
| HETATM11075 | O2 | PRP | 768 | 28.974 | 11.508 | 14.532 | 1.00 | 0.00 |
| O           |    |     |     |        |        |        |      |      |
| HETATM11076 | H5 | PRP | 768 | 28.055 | 11.571 | 14.262 | 1.00 | 0.00 |
| H           |    |     |     |        |        |        |      |      |
| HETATM11077 | C3 | PRP | 768 | 30.806 | 12.295 | 15.917 | 1.00 | 0.00 |
| C           |    |     |     |        |        |        |      |      |
| HETATM11078 | H6 | PRP | 768 | 31.034 | 11.233 | 16.005 | 1.00 | 0.00 |
| H           |    |     |     |        |        |        |      |      |
| HETATM11079 | H7 | PRP | 768 | 31.532 | 12.505 | 15.133 | 1.00 | 0.00 |
| H           |    |     |     |        |        |        |      |      |
| HETATM11080 | H8 | PRP | 768 | 31.238 | 12.887 | 16.724 | 1.00 | 0.00 |
| H           |    |     |     |        |        |        |      |      |
| HETATM11081 | O1 | PRP | 769 | 32.165 | 5.626  | 10.491 | 1.00 | 0.00 |
| O           |    |     |     |        |        |        |      |      |
| HETATM11082 | H1 | PRP | 769 | 31.933 | 6.030  | 11.331 | 1.00 | 0.00 |
| H           |    |     |     |        |        |        |      |      |
| HETATM11083 | C1 | PRP | 769 | 33.155 | 6.417  | 9.799  | 1.00 | 0.00 |
| C           |    |     |     |        |        |        |      |      |
| HETATM11084 | H2 | PRP | 769 | 33.880 | 6.631  | 10.584 | 1.00 | 0.00 |
| H           |    |     |     |        |        |        |      |      |
| HETATM11085 | H3 | PRP | 769 | 33.603 | 5.826  | 9.000  | 1.00 | 0.00 |
| H           |    |     |     |        |        |        |      |      |
| HETATM11086 | C2 | PRP | 769 | 32.388 | 7.627  | 9.142  | 1.00 | 0.00 |
| C           |    |     |     |        |        |        |      |      |
| HETATM11087 | H4 | PRP | 769 | 31.976 | 8.248  | 9.937  | 1.00 | 0.00 |
| H           |    |     |     |        |        |        |      |      |

|             |    |     |     |        |        |        |      |      |
|-------------|----|-----|-----|--------|--------|--------|------|------|
| HETATM11088 | O2 | PRP | 769 | 31.397 | 7.156  | 8.247  | 1.00 | 0.00 |
| O           |    |     |     |        |        |        |      |      |
| HETATM11089 | H5 | PRP | 769 | 31.051 | 6.355  | 8.648  | 1.00 | 0.00 |
| H           |    |     |     |        |        |        |      |      |
| HETATM11090 | C3 | PRP | 769 | 33.280 | 8.620  | 8.431  | 1.00 | 0.00 |
| C           |    |     |     |        |        |        |      |      |
| HETATM11091 | H6 | PRP | 769 | 33.805 | 8.165  | 7.592  | 1.00 | 0.00 |
| H           |    |     |     |        |        |        |      |      |
| HETATM11092 | H7 | PRP | 769 | 32.760 | 9.552  | 8.207  | 1.00 | 0.00 |
| H           |    |     |     |        |        |        |      |      |
| HETATM11093 | H8 | PRP | 769 | 34.093 | 8.925  | 9.090  | 1.00 | 0.00 |
| H           |    |     |     |        |        |        |      |      |
| HETATM11094 | O1 | PRP | 770 | 18.130 | 13.458 | 6.484  | 1.00 | 0.00 |
| O           |    |     |     |        |        |        |      |      |
| HETATM11095 | H1 | PRP | 770 | 18.815 | 13.966 | 6.042  | 1.00 | 0.00 |
| H           |    |     |     |        |        |        |      |      |
| HETATM11096 | C1 | PRP | 770 | 18.744 | 12.307 | 7.081  | 1.00 | 0.00 |
| C           |    |     |     |        |        |        |      |      |
| HETATM11097 | H2 | PRP | 770 | 18.886 | 12.511 | 8.142  | 1.00 | 0.00 |
| H           |    |     |     |        |        |        |      |      |
| HETATM11098 | H3 | PRP | 770 | 18.159 | 11.447 | 6.754  | 1.00 | 0.00 |
| H           |    |     |     |        |        |        |      |      |
| HETATM11099 | C2 | PRP | 770 | 20.176 | 12.128 | 6.633  | 1.00 | 0.00 |
| C           |    |     |     |        |        |        |      |      |
| HETATM11100 | H4 | PRP | 770 | 20.782 | 12.982 | 6.933  | 1.00 | 0.00 |
| H           |    |     |     |        |        |        |      |      |
| HETATM11101 | O2 | PRP | 770 | 20.383 | 12.038 | 5.271  | 1.00 | 0.00 |
| O           |    |     |     |        |        |        |      |      |
| HETATM11102 | H5 | PRP | 770 | 20.629 | 12.900 | 4.927  | 1.00 | 0.00 |
| H           |    |     |     |        |        |        |      |      |
| HETATM11103 | C3 | PRP | 770 | 20.755 | 10.915 | 7.397  | 1.00 | 0.00 |
| C           |    |     |     |        |        |        |      |      |
| HETATM11104 | H6 | PRP | 770 | 20.004 | 10.134 | 7.513  | 1.00 | 0.00 |
| H           |    |     |     |        |        |        |      |      |
| HETATM11105 | H7 | PRP | 770 | 21.716 | 10.697 | 6.932  | 1.00 | 0.00 |
| H           |    |     |     |        |        |        |      |      |
| HETATM11106 | H8 | PRP | 770 | 20.884 | 11.107 | 8.463  | 1.00 | 0.00 |
| H           |    |     |     |        |        |        |      |      |
| HETATM11107 | O1 | PRP | 771 | 37.857 | 10.307 | 24.613 | 1.00 | 0.00 |
| O           |    |     |     |        |        |        |      |      |
| HETATM11108 | H1 | PRP | 771 | 38.625 | 10.818 | 24.348 | 1.00 | 0.00 |
| H           |    |     |     |        |        |        |      |      |
| HETATM11109 | C1 | PRP | 771 | 38.179 | 9.312  | 25.578 | 1.00 | 0.00 |
| C           |    |     |     |        |        |        |      |      |
| HETATM11110 | H2 | PRP | 771 | 37.824 | 9.593  | 26.570 | 1.00 | 0.00 |
| H           |    |     |     |        |        |        |      |      |
| HETATM11111 | H3 | PRP | 771 | 37.629 | 8.465  | 25.169 | 1.00 | 0.00 |
| H           |    |     |     |        |        |        |      |      |
| HETATM11112 | C2 | PRP | 771 | 39.611 | 8.863  | 25.647 | 1.00 | 0.00 |
| C           |    |     |     |        |        |        |      |      |
| HETATM11113 | H4 | PRP | 771 | 39.714 | 8.210  | 26.513 | 1.00 | 0.00 |
| H           |    |     |     |        |        |        |      |      |
| HETATM11114 | O2 | PRP | 771 | 40.452 | 9.983  | 25.861 | 1.00 | 0.00 |
| O           |    |     |     |        |        |        |      |      |
| HETATM11115 | H5 | PRP | 771 | 39.989 | 10.459 | 26.554 | 1.00 | 0.00 |
| H           |    |     |     |        |        |        |      |      |



|             |    |     |     |        |        |        |      |      |
|-------------|----|-----|-----|--------|--------|--------|------|------|
| HETATM11116 | C3 | PRP | 771 | 40.051 | 8.196  | 24.325 | 1.00 | 0.00 |
| C           |    |     |     |        |        |        |      |      |
| HETATM11117 | H6 | PRP | 771 | 40.021 | 8.831  | 23.439 | 1.00 | 0.00 |
| H           |    |     |     |        |        |        |      |      |
| HETATM11118 | H7 | PRP | 771 | 41.049 | 7.766  | 24.415 | 1.00 | 0.00 |
| H           |    |     |     |        |        |        |      |      |
| HETATM11119 | H8 | PRP | 771 | 39.397 | 7.375  | 24.035 | 1.00 | 0.00 |
| H           |    |     |     |        |        |        |      |      |
| HETATM11120 | O1 | PRP | 772 | 26.113 | 16.734 | 1.454  | 1.00 | 0.00 |
| O           |    |     |     |        |        |        |      |      |
| HETATM11121 | H1 | PRP | 772 | 25.691 | 17.538 | 1.766  | 1.00 | 0.00 |
| H           |    |     |     |        |        |        |      |      |
| HETATM11122 | C1 | PRP | 772 | 25.206 | 15.674 | 1.625  | 1.00 | 0.00 |
| C           |    |     |     |        |        |        |      |      |
| HETATM11123 | H2 | PRP | 772 | 24.181 | 15.941 | 1.364  | 1.00 | 0.00 |
| H           |    |     |     |        |        |        |      |      |
| HETATM11124 | H3 | PRP | 772 | 25.607 | 14.947 | 0.919  | 1.00 | 0.00 |
| H           |    |     |     |        |        |        |      |      |
| HETATM11125 | C2 | PRP | 772 | 25.246 | 15.104 | 3.069  | 1.00 | 0.00 |
| C           |    |     |     |        |        |        |      |      |
| HETATM11126 | H4 | PRP | 772 | 24.611 | 14.218 | 3.029  | 1.00 | 0.00 |
| H           |    |     |     |        |        |        |      |      |
| HETATM11127 | O2 | PRP | 772 | 24.905 | 16.057 | 4.084  | 1.00 | 0.00 |
| O           |    |     |     |        |        |        |      |      |
| HETATM11128 | H5 | PRP | 772 | 25.261 | 15.698 | 4.901  | 1.00 | 0.00 |
| H           |    |     |     |        |        |        |      |      |
| HETATM11129 | C3 | PRP | 772 | 26.678 | 14.490 | 3.383  | 1.00 | 0.00 |
| C           |    |     |     |        |        |        |      |      |
| HETATM11130 | H6 | PRP | 772 | 27.351 | 15.347 | 3.397  | 1.00 | 0.00 |
| H           |    |     |     |        |        |        |      |      |
| HETATM11131 | H7 | PRP | 772 | 26.540 | 13.903 | 4.290  | 1.00 | 0.00 |
| H           |    |     |     |        |        |        |      |      |
| HETATM11132 | H8 | PRP | 772 | 27.011 | 13.706 | 2.703  | 1.00 | 0.00 |
| H           |    |     |     |        |        |        |      |      |
| HETATM11133 | O1 | PRP | 773 | 35.250 | 34.439 | 13.333 | 1.00 | 0.00 |
| O           |    |     |     |        |        |        |      |      |
| HETATM11134 | H1 | PRP | 773 | 36.054 | 34.373 | 13.853 | 1.00 | 0.00 |
| H           |    |     |     |        |        |        |      |      |
| HETATM11135 | C1 | PRP | 773 | 34.866 | 33.124 | 13.034 | 1.00 | 0.00 |
| C           |    |     |     |        |        |        |      |      |
| HETATM11136 | H2 | PRP | 773 | 34.615 | 32.637 | 13.976 | 1.00 | 0.00 |
| H           |    |     |     |        |        |        |      |      |
| HETATM11137 | H3 | PRP | 773 | 34.000 | 33.094 | 12.373 | 1.00 | 0.00 |
| H           |    |     |     |        |        |        |      |      |
| HETATM11138 | C2 | PRP | 773 | 35.866 | 32.430 | 12.212 | 1.00 | 0.00 |
| C           |    |     |     |        |        |        |      |      |
| HETATM11139 | H4 | PRP | 773 | 35.313 | 31.527 | 11.950 | 1.00 | 0.00 |
| H           |    |     |     |        |        |        |      |      |
| HETATM11140 | O2 | PRP | 773 | 36.952 | 32.070 | 13.035 | 1.00 | 0.00 |
| O           |    |     |     |        |        |        |      |      |
| HETATM11141 | H5 | PRP | 773 | 36.956 | 31.143 | 13.285 | 1.00 | 0.00 |
| H           |    |     |     |        |        |        |      |      |
| HETATM11142 | C3 | PRP | 773 | 36.443 | 33.198 | 10.959 | 1.00 | 0.00 |
| C           |    |     |     |        |        |        |      |      |
| HETATM11143 | H6 | PRP | 773 | 37.107 | 32.514 | 10.430 | 1.00 | 0.00 |
| H           |    |     |     |        |        |        |      |      |

|             |    |     |     |        |        |        |      |      |
|-------------|----|-----|-----|--------|--------|--------|------|------|
| HETATM11144 | H7 | PRP | 773 | 35.630 | 33.590 | 10.348 | 1.00 | 0.00 |
| H           |    |     |     |        |        |        |      |      |
| HETATM11145 | H8 | PRP | 773 | 37.129 | 34.008 | 11.206 | 1.00 | 0.00 |
| H           |    |     |     |        |        |        |      |      |
| HETATM11146 | O1 | PRP | 774 | 20.046 | 10.483 | 24.292 | 1.00 | 0.00 |
| O           |    |     |     |        |        |        |      |      |
| HETATM11147 | H1 | PRP | 774 | 20.817 | 11.048 | 24.198 | 1.00 | 0.00 |
| H           |    |     |     |        |        |        |      |      |
| HETATM11148 | C1 | PRP | 774 | 19.756 | 10.199 | 25.577 | 1.00 | 0.00 |
| C           |    |     |     |        |        |        |      |      |
| HETATM11149 | H2 | PRP | 774 | 19.126 | 9.321  | 25.443 | 1.00 | 0.00 |
| H           |    |     |     |        |        |        |      |      |
| HETATM11150 | H3 | PRP | 774 | 20.610 | 9.837  | 26.151 | 1.00 | 0.00 |
| H           |    |     |     |        |        |        |      |      |
| HETATM11151 | C2 | PRP | 774 | 18.864 | 11.221 | 26.256 | 1.00 | 0.00 |
| C           |    |     |     |        |        |        |      |      |
| HETATM11152 | H4 | PRP | 774 | 18.254 | 11.562 | 25.420 | 1.00 | 0.00 |
| H           |    |     |     |        |        |        |      |      |
| HETATM11153 | O2 | PRP | 774 | 19.598 | 12.358 | 26.741 | 1.00 | 0.00 |
| O           |    |     |     |        |        |        |      |      |
| HETATM11154 | H5 | PRP | 774 | 19.979 | 12.794 | 25.976 | 1.00 | 0.00 |
| H           |    |     |     |        |        |        |      |      |
| HETATM11155 | C3 | PRP | 774 | 17.989 | 10.692 | 27.395 | 1.00 | 0.00 |
| C           |    |     |     |        |        |        |      |      |
| HETATM11156 | H6 | PRP | 774 | 17.404 | 9.881  | 26.962 | 1.00 | 0.00 |
| H           |    |     |     |        |        |        |      |      |
| HETATM11157 | H7 | PRP | 774 | 18.553 | 10.378 | 28.274 | 1.00 | 0.00 |
| H           |    |     |     |        |        |        |      |      |
| HETATM11158 | H8 | PRP | 774 | 17.250 | 11.413 | 27.745 | 1.00 | 0.00 |
| H           |    |     |     |        |        |        |      |      |
| HETATM11159 | O1 | PRP | 775 | 4.145  | 6.308  | 10.784 | 1.00 | 0.00 |
| O           |    |     |     |        |        |        |      |      |
| HETATM11160 | H1 | PRP | 775 | 5.007  | 6.203  | 11.194 | 1.00 | 0.00 |
| H           |    |     |     |        |        |        |      |      |
| HETATM11161 | C1 | PRP | 775 | 3.480  | 5.118  | 11.199 | 1.00 | 0.00 |
| C           |    |     |     |        |        |        |      |      |
| HETATM11162 | H2 | PRP | 775 | 3.103  | 5.180  | 12.220 | 1.00 | 0.00 |
| H           |    |     |     |        |        |        |      |      |
| HETATM11163 | H3 | PRP | 775 | 2.634  | 4.945  | 10.533 | 1.00 | 0.00 |
| H           |    |     |     |        |        |        |      |      |
| HETATM11164 | C2 | PRP | 775 | 4.319  | 3.896  | 11.106 | 1.00 | 0.00 |
| C           |    |     |     |        |        |        |      |      |
| HETATM11165 | H4 | PRP | 775 | 3.771  | 2.999  | 11.396 | 1.00 | 0.00 |
| H           |    |     |     |        |        |        |      |      |
| HETATM11166 | O2 | PRP | 775 | 5.401  | 4.071  | 11.975 | 1.00 | 0.00 |
| O           |    |     |     |        |        |        |      |      |
| HETATM11167 | H5 | PRP | 775 | 5.526  | 3.243  | 12.443 | 1.00 | 0.00 |
| H           |    |     |     |        |        |        |      |      |
| HETATM11168 | C3 | PRP | 775 | 4.832  | 3.655  | 9.729  | 1.00 | 0.00 |
| C           |    |     |     |        |        |        |      |      |
| HETATM11169 | H6 | PRP | 775 | 5.314  | 4.554  | 9.345  | 1.00 | 0.00 |
| H           |    |     |     |        |        |        |      |      |
| HETATM11170 | H7 | PRP | 775 | 5.509  | 2.813  | 9.584  | 1.00 | 0.00 |
| H           |    |     |     |        |        |        |      |      |
| HETATM11171 | H8 | PRP | 775 | 4.140  | 3.506  | 8.900  | 1.00 | 0.00 |
| H           |    |     |     |        |        |        |      |      |

|             |    |     |     |        |        |        |      |      |
|-------------|----|-----|-----|--------|--------|--------|------|------|
| HETATM11172 | O1 | PRP | 776 | 27.184 | 10.227 | 20.680 | 1.00 | 0.00 |
| O           |    |     |     |        |        |        |      |      |
| HETATM11173 | H1 | PRP | 776 | 27.944 | 9.670  | 20.499 | 1.00 | 0.00 |
| H           |    |     |     |        |        |        |      |      |
| HETATM11174 | C1 | PRP | 776 | 27.531 | 11.521 | 20.208 | 1.00 | 0.00 |
| C           |    |     |     |        |        |        |      |      |
| HETATM11175 | H2 | PRP | 776 | 28.043 | 12.030 | 21.025 | 1.00 | 0.00 |
| H           |    |     |     |        |        |        |      |      |
| HETATM11176 | H3 | PRP | 776 | 28.179 | 11.242 | 19.377 | 1.00 | 0.00 |
| H           |    |     |     |        |        |        |      |      |
| HETATM11177 | C2 | PRP | 776 | 26.296 | 12.353 | 19.720 | 1.00 | 0.00 |
| C           |    |     |     |        |        |        |      |      |
| HETATM11178 | H4 | PRP | 776 | 25.507 | 12.353 | 20.472 | 1.00 | 0.00 |
| H           |    |     |     |        |        |        |      |      |
| HETATM11179 | O2 | PRP | 776 | 25.890 | 11.777 | 18.490 | 1.00 | 0.00 |
| O           |    |     |     |        |        |        |      |      |
| HETATM11180 | H5 | PRP | 776 | 25.429 | 10.982 | 18.767 | 1.00 | 0.00 |
| H           |    |     |     |        |        |        |      |      |
| HETATM11181 | C3 | PRP | 776 | 26.751 | 13.783 | 19.529 | 1.00 | 0.00 |
| C           |    |     |     |        |        |        |      |      |
| HETATM11182 | H6 | PRP | 776 | 27.734 | 13.970 | 19.096 | 1.00 | 0.00 |
| H           |    |     |     |        |        |        |      |      |
| HETATM11183 | H7 | PRP | 776 | 25.949 | 14.320 | 19.022 | 1.00 | 0.00 |
| H           |    |     |     |        |        |        |      |      |
| HETATM11184 | H8 | PRP | 776 | 26.740 | 14.182 | 20.543 | 1.00 | 0.00 |
| H           |    |     |     |        |        |        |      |      |
| HETATM11185 | O1 | PRP | 777 | 27.307 | 18.881 | 11.537 | 1.00 | 0.00 |
| O           |    |     |     |        |        |        |      |      |
| HETATM11186 | H1 | PRP | 777 | 28.191 | 19.246 | 11.619 | 1.00 | 0.00 |
| H           |    |     |     |        |        |        |      |      |
| HETATM11187 | C1 | PRP | 777 | 26.806 | 18.781 | 12.827 | 1.00 | 0.00 |
| C           |    |     |     |        |        |        |      |      |
| HETATM11188 | H2 | PRP | 777 | 25.728 | 18.725 | 12.678 | 1.00 | 0.00 |
| H           |    |     |     |        |        |        |      |      |
| HETATM11189 | H3 | PRP | 777 | 27.200 | 17.827 | 13.177 | 1.00 | 0.00 |
| H           |    |     |     |        |        |        |      |      |
| HETATM11190 | C2 | PRP | 777 | 27.341 | 19.956 | 13.625 | 1.00 | 0.00 |
| C           |    |     |     |        |        |        |      |      |
| HETATM11191 | H4 | PRP | 777 | 26.597 | 20.747 | 13.534 | 1.00 | 0.00 |
| H           |    |     |     |        |        |        |      |      |
| HETATM11192 | O2 | PRP | 777 | 28.603 | 20.435 | 13.271 | 1.00 | 0.00 |
| O           |    |     |     |        |        |        |      |      |
| HETATM11193 | H5 | PRP | 777 | 28.791 | 21.314 | 13.609 | 1.00 | 0.00 |
| H           |    |     |     |        |        |        |      |      |
| HETATM11194 | C3 | PRP | 777 | 27.359 | 19.703 | 15.194 | 1.00 | 0.00 |
| C           |    |     |     |        |        |        |      |      |
| HETATM11195 | H6 | PRP | 777 | 28.123 | 18.927 | 15.244 | 1.00 | 0.00 |
| H           |    |     |     |        |        |        |      |      |
| HETATM11196 | H7 | PRP | 777 | 27.532 | 20.655 | 15.696 | 1.00 | 0.00 |
| H           |    |     |     |        |        |        |      |      |
| HETATM11197 | H8 | PRP | 777 | 26.391 | 19.278 | 15.462 | 1.00 | 0.00 |
| H           |    |     |     |        |        |        |      |      |
| HETATM11198 | O1 | PRP | 778 | 36.202 | 16.421 | 12.903 | 1.00 | 0.00 |
| O           |    |     |     |        |        |        |      |      |
| HETATM11199 | H1 | PRP | 778 | 36.515 | 17.328 | 12.913 | 1.00 | 0.00 |
| H           |    |     |     |        |        |        |      |      |

|             |    |     |     |        |        |        |      |      |
|-------------|----|-----|-----|--------|--------|--------|------|------|
| HETATM11200 | C1 | PRP | 778 | 37.148 | 15.716 | 13.653 | 1.00 | 0.00 |
| C           |    |     |     |        |        |        |      |      |
| HETATM11201 | H2 | PRP | 778 | 36.898 | 14.658 | 13.739 | 1.00 | 0.00 |
| H           |    |     |     |        |        |        |      |      |
| HETATM11202 | H3 | PRP | 778 | 38.070 | 15.844 | 13.087 | 1.00 | 0.00 |
| H           |    |     |     |        |        |        |      |      |
| HETATM11203 | C2 | PRP | 778 | 37.354 | 16.310 | 15.039 | 1.00 | 0.00 |
| C           |    |     |     |        |        |        |      |      |
| HETATM11204 | H4 | PRP | 778 | 36.466 | 16.192 | 15.661 | 1.00 | 0.00 |
| H           |    |     |     |        |        |        |      |      |
| HETATM11205 | O2 | PRP | 778 | 37.875 | 17.623 | 14.922 | 1.00 | 0.00 |
| O           |    |     |     |        |        |        |      |      |
| HETATM11206 | H5 | PRP | 778 | 37.197 | 18.234 | 14.625 | 1.00 | 0.00 |
| H           |    |     |     |        |        |        |      |      |
| HETATM11207 | C3 | PRP | 778 | 38.358 | 15.461 | 15.787 | 1.00 | 0.00 |
| C           |    |     |     |        |        |        |      |      |
| HETATM11208 | H6 | PRP | 778 | 38.491 | 16.066 | 16.684 | 1.00 | 0.00 |
| H           |    |     |     |        |        |        |      |      |
| HETATM11209 | H7 | PRP | 778 | 37.916 | 14.496 | 16.033 | 1.00 | 0.00 |
| H           |    |     |     |        |        |        |      |      |
| HETATM11210 | H8 | PRP | 778 | 39.278 | 15.255 | 15.240 | 1.00 | 0.00 |
| H           |    |     |     |        |        |        |      |      |
| HETATM11211 | O1 | PRP | 779 | 24.252 | 29.522 | 5.262  | 1.00 | 0.00 |
| O           |    |     |     |        |        |        |      |      |
| HETATM11212 | H1 | PRP | 779 | 23.528 | 28.977 | 4.948  | 1.00 | 0.00 |
| H           |    |     |     |        |        |        |      |      |
| HETATM11213 | C1 | PRP | 779 | 25.201 | 28.812 | 5.995  | 1.00 | 0.00 |
| C           |    |     |     |        |        |        |      |      |
| HETATM11214 | H2 | PRP | 779 | 24.993 | 29.018 | 7.045  | 1.00 | 0.00 |
| H           |    |     |     |        |        |        |      |      |
| HETATM11215 | H3 | PRP | 779 | 25.134 | 27.750 | 5.758  | 1.00 | 0.00 |
| H           |    |     |     |        |        |        |      |      |
| HETATM11216 | C2 | PRP | 779 | 26.567 | 29.372 | 5.655  | 1.00 | 0.00 |
| C           |    |     |     |        |        |        |      |      |
| HETATM11217 | H4 | PRP | 779 | 26.434 | 30.376 | 6.057  | 1.00 | 0.00 |
| H           |    |     |     |        |        |        |      |      |
| HETATM11218 | O2 | PRP | 779 | 26.829 | 29.411 | 4.318  | 1.00 | 0.00 |
| O           |    |     |     |        |        |        |      |      |
| HETATM11219 | H5 | PRP | 779 | 26.093 | 29.887 | 3.924  | 1.00 | 0.00 |
| H           |    |     |     |        |        |        |      |      |
| HETATM11220 | C3 | PRP | 779 | 27.657 | 28.529 | 6.250  | 1.00 | 0.00 |
| C           |    |     |     |        |        |        |      |      |
| HETATM11221 | H6 | PRP | 779 | 28.524 | 29.122 | 6.539  | 1.00 | 0.00 |
| H           |    |     |     |        |        |        |      |      |
| HETATM11222 | H7 | PRP | 779 | 27.289 | 28.195 | 7.221  | 1.00 | 0.00 |
| H           |    |     |     |        |        |        |      |      |
| HETATM11223 | H8 | PRP | 779 | 27.853 | 27.711 | 5.557  | 1.00 | 0.00 |
| H           |    |     |     |        |        |        |      |      |
| HETATM11224 | O1 | PRP | 780 | 31.632 | 28.443 | 9.541  | 1.00 | 0.00 |
| O           |    |     |     |        |        |        |      |      |
| HETATM11225 | H1 | PRP | 780 | 31.807 | 28.980 | 10.317 | 1.00 | 0.00 |
| H           |    |     |     |        |        |        |      |      |
| HETATM11226 | C1 | PRP | 780 | 31.679 | 29.273 | 8.444  | 1.00 | 0.00 |
| C           |    |     |     |        |        |        |      |      |
| HETATM11227 | H2 | PRP | 780 | 31.557 | 28.656 | 7.554  | 1.00 | 0.00 |
| H           |    |     |     |        |        |        |      |      |

|             |    |     |     |        |        |        |      |      |
|-------------|----|-----|-----|--------|--------|--------|------|------|
| HETATM11228 | H3 | PRP | 780 | 30.941 | 30.069 | 8.541  | 1.00 | 0.00 |
| H           |    |     |     |        |        |        |      |      |
| HETATM11229 | C2 | PRP | 780 | 33.087 | 30.024 | 8.467  | 1.00 | 0.00 |
| C           |    |     |     |        |        |        |      |      |
| HETATM11230 | H4 | PRP | 780 | 33.838 | 29.235 | 8.438  | 1.00 | 0.00 |
| H           |    |     |     |        |        |        |      |      |
| HETATM11231 | O2 | PRP | 780 | 33.299 | 30.819 | 9.673  | 1.00 | 0.00 |
| O           |    |     |     |        |        |        |      |      |
| HETATM11232 | H5 | PRP | 780 | 32.774 | 31.614 | 9.555  | 1.00 | 0.00 |
| H           |    |     |     |        |        |        |      |      |
| HETATM11233 | C3 | PRP | 780 | 33.360 | 30.997 | 7.409  | 1.00 | 0.00 |
| C           |    |     |     |        |        |        |      |      |
| HETATM11234 | H6 | PRP | 780 | 32.470 | 31.575 | 7.161  | 1.00 | 0.00 |
| H           |    |     |     |        |        |        |      |      |
| HETATM11235 | H7 | PRP | 780 | 34.086 | 31.776 | 7.640  | 1.00 | 0.00 |
| H           |    |     |     |        |        |        |      |      |
| HETATM11236 | H8 | PRP | 780 | 33.708 | 30.459 | 6.527  | 1.00 | 0.00 |
| H           |    |     |     |        |        |        |      |      |
| HETATM11237 | O1 | PRP | 781 | 25.756 | 4.471  | 13.578 | 1.00 | 0.00 |
| O           |    |     |     |        |        |        |      |      |
| HETATM11238 | H1 | PRP | 781 | 25.292 | 4.184  | 12.788 | 1.00 | 0.00 |
| H           |    |     |     |        |        |        |      |      |
| HETATM11239 | C1 | PRP | 781 | 25.007 | 3.934  | 14.616 | 1.00 | 0.00 |
| C           |    |     |     |        |        |        |      |      |
| HETATM11240 | H2 | PRP | 781 | 24.141 | 4.595  | 14.648 | 1.00 | 0.00 |
| H           |    |     |     |        |        |        |      |      |
| HETATM11241 | H3 | PRP | 781 | 24.742 | 2.900  | 14.399 | 1.00 | 0.00 |
| H           |    |     |     |        |        |        |      |      |
| HETATM11242 | C2 | PRP | 781 | 25.701 | 3.947  | 16.056 | 1.00 | 0.00 |
| C           |    |     |     |        |        |        |      |      |
| HETATM11243 | H4 | PRP | 781 | 25.972 | 4.992  | 16.204 | 1.00 | 0.00 |
| H           |    |     |     |        |        |        |      |      |
| HETATM11244 | O2 | PRP | 781 | 26.838 | 3.120  | 16.154 | 1.00 | 0.00 |
| O           |    |     |     |        |        |        |      |      |
| HETATM11245 | H5 | PRP | 781 | 27.327 | 3.206  | 15.331 | 1.00 | 0.00 |
| H           |    |     |     |        |        |        |      |      |
| HETATM11246 | C3 | PRP | 781 | 24.647 | 3.471  | 16.955 | 1.00 | 0.00 |
| C           |    |     |     |        |        |        |      |      |
| HETATM11247 | H6 | PRP | 781 | 24.924 | 3.653  | 17.993 | 1.00 | 0.00 |
| H           |    |     |     |        |        |        |      |      |
| HETATM11248 | H7 | PRP | 781 | 23.700 | 3.982  | 16.780 | 1.00 | 0.00 |
| H           |    |     |     |        |        |        |      |      |
| HETATM11249 | H8 | PRP | 781 | 24.578 | 2.389  | 16.850 | 1.00 | 0.00 |
| H           |    |     |     |        |        |        |      |      |
| HETATM11250 | O1 | PRP | 782 | 23.879 | 3.740  | 11.379 | 1.00 | 0.00 |
| O           |    |     |     |        |        |        |      |      |
| HETATM11251 | H1 | PRP | 782 | 23.201 | 4.177  | 10.858 | 1.00 | 0.00 |
| H           |    |     |     |        |        |        |      |      |
| HETATM11252 | C1 | PRP | 782 | 24.325 | 2.617  | 10.630 | 1.00 | 0.00 |
| C           |    |     |     |        |        |        |      |      |
| HETATM11253 | H2 | PRP | 782 | 25.187 | 2.219  | 11.165 | 1.00 | 0.00 |
| H           |    |     |     |        |        |        |      |      |
| HETATM11254 | H3 | PRP | 782 | 23.493 | 1.913  | 10.603 | 1.00 | 0.00 |
| H           |    |     |     |        |        |        |      |      |
| HETATM11255 | C2 | PRP | 782 | 24.804 | 2.987  | 9.185  | 1.00 | 0.00 |
| C           |    |     |     |        |        |        |      |      |

|             |    |     |     |        |        |        |      |      |
|-------------|----|-----|-----|--------|--------|--------|------|------|
| HETATM11256 | H4 | PRP | 782 | 25.536 | 3.792  | 9.120  | 1.00 | 0.00 |
| H           |    |     |     |        |        |        |      |      |
| HETATM11257 | O2 | PRP | 782 | 23.586 | 3.256  | 8.498  | 1.00 | 0.00 |
| O           |    |     |     |        |        |        |      |      |
| HETATM11258 | H5 | PRP | 782 | 22.992 | 2.564  | 8.800  | 1.00 | 0.00 |
| H           |    |     |     |        |        |        |      |      |
| HETATM11259 | C3 | PRP | 782 | 25.252 | 1.695  | 8.603  | 1.00 | 0.00 |
| C           |    |     |     |        |        |        |      |      |
| HETATM11260 | H6 | PRP | 782 | 26.043 | 1.214  | 9.179  | 1.00 | 0.00 |
| H           |    |     |     |        |        |        |      |      |
| HETATM11261 | H7 | PRP | 782 | 24.350 | 1.083  | 8.574  | 1.00 | 0.00 |
| H           |    |     |     |        |        |        |      |      |
| HETATM11262 | H8 | PRP | 782 | 25.541 | 1.779  | 7.555  | 1.00 | 0.00 |
| H           |    |     |     |        |        |        |      |      |
| HETATM11263 | O1 | PRP | 783 | 18.071 | 6.571  | 1.985  | 1.00 | 0.00 |
| O           |    |     |     |        |        |        |      |      |
| HETATM11264 | H1 | PRP | 783 | 17.905 | 7.152  | 2.732  | 1.00 | 0.00 |
| H           |    |     |     |        |        |        |      |      |
| HETATM11265 | C1 | PRP | 783 | 16.921 | 6.678  | 1.155  | 1.00 | 0.00 |
| C           |    |     |     |        |        |        |      |      |
| HETATM11266 | H2 | PRP | 783 | 16.029 | 6.430  | 1.729  | 1.00 | 0.00 |
| H           |    |     |     |        |        |        |      |      |
| HETATM11267 | H3 | PRP | 783 | 16.864 | 7.698  | 0.776  | 1.00 | 0.00 |
| H           |    |     |     |        |        |        |      |      |
| HETATM11268 | C2 | PRP | 783 | 17.083 | 5.668  | -0.030 | 1.00 | 0.00 |
| C           |    |     |     |        |        |        |      |      |
| HETATM11269 | H4 | PRP | 783 | 16.965 | 4.668  | 0.387  | 1.00 | 0.00 |
| H           |    |     |     |        |        |        |      |      |
| HETATM11270 | O2 | PRP | 783 | 18.399 | 5.792  | -0.537 | 1.00 | 0.00 |
| O           |    |     |     |        |        |        |      |      |
| HETATM11271 | H5 | PRP | 783 | 18.932 | 6.092  | 0.203  | 1.00 | 0.00 |
| H           |    |     |     |        |        |        |      |      |
| HETATM11272 | C3 | PRP | 783 | 16.084 | 5.910  | -1.171 | 1.00 | 0.00 |
| C           |    |     |     |        |        |        |      |      |
| HETATM11273 | H6 | PRP | 783 | 16.352 | 6.853  | -1.648 | 1.00 | 0.00 |
| H           |    |     |     |        |        |        |      |      |
| HETATM11274 | H7 | PRP | 783 | 16.098 | 5.123  | -1.925 | 1.00 | 0.00 |
| H           |    |     |     |        |        |        |      |      |
| HETATM11275 | H8 | PRP | 783 | 15.095 | 6.140  | -0.775 | 1.00 | 0.00 |
| H           |    |     |     |        |        |        |      |      |
| HETATM11276 | O1 | PRP | 784 | 25.675 | 10.499 | 4.193  | 1.00 | 0.00 |
| O           |    |     |     |        |        |        |      |      |
| HETATM11277 | H1 | PRP | 784 | 25.956 | 9.580  | 4.195  | 1.00 | 0.00 |
| H           |    |     |     |        |        |        |      |      |
| HETATM11278 | C1 | PRP | 784 | 25.027 | 10.965 | 2.989  | 1.00 | 0.00 |
| C           |    |     |     |        |        |        |      |      |
| HETATM11279 | H2 | PRP | 784 | 25.418 | 11.891 | 2.568  | 1.00 | 0.00 |
| H           |    |     |     |        |        |        |      |      |
| HETATM11280 | H3 | PRP | 784 | 25.167 | 10.157 | 2.271  | 1.00 | 0.00 |
| H           |    |     |     |        |        |        |      |      |
| HETATM11281 | C2 | PRP | 784 | 23.513 | 11.180 | 3.190  | 1.00 | 0.00 |
| C           |    |     |     |        |        |        |      |      |
| HETATM11282 | H4 | PRP | 784 | 23.448 | 11.814 | 4.074  | 1.00 | 0.00 |
| H           |    |     |     |        |        |        |      |      |
| HETATM11283 | O2 | PRP | 784 | 23.053 | 9.922  | 3.453  | 1.00 | 0.00 |
| O           |    |     |     |        |        |        |      |      |

|             |    |     |     |        |        |        |      |      |
|-------------|----|-----|-----|--------|--------|--------|------|------|
| HETATM11284 | H5 | PRP | 784 | 23.439 | 9.551  | 4.250  | 1.00 | 0.00 |
| H           |    |     |     |        |        |        |      |      |
| HETATM11285 | C3 | PRP | 784 | 22.875 | 11.938 | 2.018  | 1.00 | 0.00 |
| C           |    |     |     |        |        |        |      |      |
| HETATM11286 | H6 | PRP | 784 | 21.917 | 12.304 | 2.389  | 1.00 | 0.00 |
| H           |    |     |     |        |        |        |      |      |
| HETATM11287 | H7 | PRP | 784 | 23.459 | 12.755 | 1.594  | 1.00 | 0.00 |
| H           |    |     |     |        |        |        |      |      |
| HETATM11288 | H8 | PRP | 784 | 22.773 | 11.126 | 1.298  | 1.00 | 0.00 |
| H           |    |     |     |        |        |        |      |      |
| HETATM11289 | O1 | PRP | 785 | 30.386 | 9.337  | 13.305 | 1.00 | 0.00 |
| O           |    |     |     |        |        |        |      |      |
| HETATM11290 | H1 | PRP | 785 | 29.955 | 10.012 | 13.836 | 1.00 | 0.00 |
| H           |    |     |     |        |        |        |      |      |
| HETATM11291 | C1 | PRP | 785 | 29.362 | 8.308  | 13.195 | 1.00 | 0.00 |
| C           |    |     |     |        |        |        |      |      |
| HETATM11292 | H2 | PRP | 785 | 28.476 | 8.629  | 12.648 | 1.00 | 0.00 |
| H           |    |     |     |        |        |        |      |      |
| HETATM11293 | H3 | PRP | 785 | 29.681 | 7.528  | 12.504 | 1.00 | 0.00 |
| H           |    |     |     |        |        |        |      |      |
| HETATM11294 | C2 | PRP | 785 | 29.063 | 7.736  | 14.616 | 1.00 | 0.00 |
| C           |    |     |     |        |        |        |      |      |
| HETATM11295 | H4 | PRP | 785 | 28.866 | 8.602  | 15.248 | 1.00 | 0.00 |
| H           |    |     |     |        |        |        |      |      |
| HETATM11296 | O2 | PRP | 785 | 30.248 | 7.037  | 15.067 | 1.00 | 0.00 |
| O           |    |     |     |        |        |        |      |      |
| HETATM11297 | H5 | PRP | 785 | 30.644 | 7.564  | 15.765 | 1.00 | 0.00 |
| H           |    |     |     |        |        |        |      |      |
| HETATM11298 | C3 | PRP | 785 | 27.860 | 6.770  | 14.492 | 1.00 | 0.00 |
| C           |    |     |     |        |        |        |      |      |
| HETATM11299 | H6 | PRP | 785 | 26.876 | 7.198  | 14.302 | 1.00 | 0.00 |
| H           |    |     |     |        |        |        |      |      |
| HETATM11300 | H7 | PRP | 785 | 28.087 | 5.924  | 13.843 | 1.00 | 0.00 |
| H           |    |     |     |        |        |        |      |      |
| HETATM11301 | H8 | PRP | 785 | 27.620 | 6.358  | 15.472 | 1.00 | 0.00 |
| H           |    |     |     |        |        |        |      |      |
| HETATM11302 | O1 | PRP | 786 | 33.667 | 34.255 | -2.736 | 1.00 | 0.00 |
| O           |    |     |     |        |        |        |      |      |
| HETATM11303 | H1 | PRP | 786 | 34.003 | 33.609 | -3.362 | 1.00 | 0.00 |
| H           |    |     |     |        |        |        |      |      |
| HETATM11304 | C1 | PRP | 786 | 34.891 | 34.700 | -2.093 | 1.00 | 0.00 |
| C           |    |     |     |        |        |        |      |      |
| HETATM11305 | H2 | PRP | 786 | 35.508 | 33.819 | -1.919 | 1.00 | 0.00 |
| H           |    |     |     |        |        |        |      |      |
| HETATM11306 | H3 | PRP | 786 | 35.439 | 35.346 | -2.779 | 1.00 | 0.00 |
| H           |    |     |     |        |        |        |      |      |
| HETATM11307 | C2 | PRP | 786 | 34.756 | 35.586 | -0.889 | 1.00 | 0.00 |
| C           |    |     |     |        |        |        |      |      |
| HETATM11308 | H4 | PRP | 786 | 35.544 | 36.260 | -0.553 | 1.00 | 0.00 |
| H           |    |     |     |        |        |        |      |      |
| HETATM11309 | O2 | PRP | 786 | 34.573 | 34.786 | 0.287  | 1.00 | 0.00 |
| O           |    |     |     |        |        |        |      |      |
| HETATM11310 | H5 | PRP | 786 | 33.922 | 34.132 | 0.021  | 1.00 | 0.00 |
| H           |    |     |     |        |        |        |      |      |
| HETATM11311 | C3 | PRP | 786 | 33.602 | 36.474 | -1.079 | 1.00 | 0.00 |
| C           |    |     |     |        |        |        |      |      |

|             |    |     |     |        |        |        |      |      |
|-------------|----|-----|-----|--------|--------|--------|------|------|
| HETATM11312 | H6 | PRP | 786 | 33.810 | 37.058 | -1.976 | 1.00 | 0.00 |
| H           |    |     |     |        |        |        |      |      |
| HETATM11313 | H7 | PRP | 786 | 32.718 | 35.845 | -1.187 | 1.00 | 0.00 |
| H           |    |     |     |        |        |        |      |      |
| HETATM11314 | H8 | PRP | 786 | 33.551 | 37.071 | -0.168 | 1.00 | 0.00 |
| H           |    |     |     |        |        |        |      |      |
| HETATM11315 | O1 | PRP | 787 | 34.319 | 24.725 | 6.894  | 1.00 | 0.00 |
| O           |    |     |     |        |        |        |      |      |
| HETATM11316 | H1 | PRP | 787 | 34.776 | 23.974 | 6.507  | 1.00 | 0.00 |
| H           |    |     |     |        |        |        |      |      |
| HETATM11317 | C1 | PRP | 787 | 33.877 | 24.348 | 8.204  | 1.00 | 0.00 |
| C           |    |     |     |        |        |        |      |      |
| HETATM11318 | H2 | PRP | 787 | 33.092 | 23.613 | 8.028  | 1.00 | 0.00 |
| H           |    |     |     |        |        |        |      |      |
| HETATM11319 | H3 | PRP | 787 | 34.745 | 23.900 | 8.689  | 1.00 | 0.00 |
| H           |    |     |     |        |        |        |      |      |
| HETATM11320 | C2 | PRP | 787 | 33.156 | 25.425 | 8.949  | 1.00 | 0.00 |
| C           |    |     |     |        |        |        |      |      |
| HETATM11321 | H4 | PRP | 787 | 32.135 | 25.439 | 8.567  | 1.00 | 0.00 |
| H           |    |     |     |        |        |        |      |      |
| HETATM11322 | O2 | PRP | 787 | 33.781 | 26.687 | 8.815  | 1.00 | 0.00 |
| O           |    |     |     |        |        |        |      |      |
| HETATM11323 | H5 | PRP | 787 | 33.133 | 27.395 | 8.811  | 1.00 | 0.00 |
| H           |    |     |     |        |        |        |      |      |
| HETATM11324 | C3 | PRP | 787 | 33.029 | 25.083 | 10.429 | 1.00 | 0.00 |
| C           |    |     |     |        |        |        |      |      |
| HETATM11325 | H6 | PRP | 787 | 33.973 | 25.029 | 10.971 | 1.00 | 0.00 |
| H           |    |     |     |        |        |        |      |      |
| HETATM11326 | H7 | PRP | 787 | 32.493 | 25.887 | 10.933 | 1.00 | 0.00 |
| H           |    |     |     |        |        |        |      |      |
| HETATM11327 | H8 | PRP | 787 | 32.431 | 24.186 | 10.591 | 1.00 | 0.00 |
| H           |    |     |     |        |        |        |      |      |
| HETATM11328 | O1 | PRP | 788 | 17.254 | 17.192 | -3.990 | 1.00 | 0.00 |
| O           |    |     |     |        |        |        |      |      |
| HETATM11329 | H1 | PRP | 788 | 16.414 | 16.806 | -3.732 | 1.00 | 0.00 |
| H           |    |     |     |        |        |        |      |      |
| HETATM11330 | C1 | PRP | 788 | 18.202 | 16.718 | -2.973 | 1.00 | 0.00 |
| C           |    |     |     |        |        |        |      |      |
| HETATM11331 | H2 | PRP | 788 | 19.143 | 17.232 | -3.168 | 1.00 | 0.00 |
| H           |    |     |     |        |        |        |      |      |
| HETATM11332 | H3 | PRP | 788 | 17.963 | 17.175 | -2.013 | 1.00 | 0.00 |
| H           |    |     |     |        |        |        |      |      |
| HETATM11333 | C2 | PRP | 788 | 18.569 | 15.278 | -2.882 | 1.00 | 0.00 |
| C           |    |     |     |        |        |        |      |      |
| HETATM11334 | H4 | PRP | 788 | 19.178 | 15.067 | -3.761 | 1.00 | 0.00 |
| H           |    |     |     |        |        |        |      |      |
| HETATM11335 | O2 | PRP | 788 | 17.400 | 14.507 | -2.688 | 1.00 | 0.00 |
| O           |    |     |     |        |        |        |      |      |
| HETATM11336 | H5 | PRP | 788 | 17.544 | 13.600 | -2.967 | 1.00 | 0.00 |
| H           |    |     |     |        |        |        |      |      |
| HETATM11337 | C3 | PRP | 788 | 19.338 | 15.063 | -1.630 | 1.00 | 0.00 |
| C           |    |     |     |        |        |        |      |      |
| HETATM11338 | H6 | PRP | 788 | 20.130 | 15.810 | -1.578 | 1.00 | 0.00 |
| H           |    |     |     |        |        |        |      |      |
| HETATM11339 | H7 | PRP | 788 | 18.625 | 15.149 | -0.809 | 1.00 | 0.00 |
| H           |    |     |     |        |        |        |      |      |



|             |    |     |     |        |        |        |      |      |
|-------------|----|-----|-----|--------|--------|--------|------|------|
| HETATM11340 | H8 | PRP | 788 | 19.864 | 14.115 | -1.516 | 1.00 | 0.00 |
| H           |    |     |     |        |        |        |      |      |
| HETATM11341 | O1 | PRP | 789 | 25.353 | 17.909 | 7.569  | 1.00 | 0.00 |
| O           |    |     |     |        |        |        |      |      |
| HETATM11342 | H1 | PRP | 789 | 25.731 | 17.135 | 7.144  | 1.00 | 0.00 |
| H           |    |     |     |        |        |        |      |      |
| HETATM11343 | C1 | PRP | 789 | 25.427 | 17.746 | 8.991  | 1.00 | 0.00 |
| C           |    |     |     |        |        |        |      |      |
| HETATM11344 | H2 | PRP | 789 | 26.481 | 17.847 | 9.249  | 1.00 | 0.00 |
| H           |    |     |     |        |        |        |      |      |
| HETATM11345 | H3 | PRP | 789 | 24.786 | 18.463 | 9.504  | 1.00 | 0.00 |
| H           |    |     |     |        |        |        |      |      |
| HETATM11346 | C2 | PRP | 789 | 24.808 | 16.342 | 9.406  | 1.00 | 0.00 |
| C           |    |     |     |        |        |        |      |      |
| HETATM11347 | H4 | PRP | 789 | 24.821 | 16.093 | 10.468 | 1.00 | 0.00 |
| H           |    |     |     |        |        |        |      |      |
| HETATM11348 | O2 | PRP | 789 | 25.722 | 15.480 | 8.798  | 1.00 | 0.00 |
| O           |    |     |     |        |        |        |      |      |
| HETATM11349 | H5 | PRP | 789 | 25.785 | 14.671 | 9.311  | 1.00 | 0.00 |
| H           |    |     |     |        |        |        |      |      |
| HETATM11350 | C3 | PRP | 789 | 23.410 | 15.958 | 8.734  | 1.00 | 0.00 |
| C           |    |     |     |        |        |        |      |      |
| HETATM11351 | H6 | PRP | 789 | 23.447 | 16.261 | 7.688  | 1.00 | 0.00 |
| H           |    |     |     |        |        |        |      |      |
| HETATM11352 | H7 | PRP | 789 | 23.235 | 14.884 | 8.797  | 1.00 | 0.00 |
| H           |    |     |     |        |        |        |      |      |
| HETATM11353 | H8 | PRP | 789 | 22.590 | 16.537 | 9.159  | 1.00 | 0.00 |
| H           |    |     |     |        |        |        |      |      |
| HETATM11354 | O1 | PRP | 790 | 18.043 | 10.537 | 15.831 | 1.00 | 0.00 |
| O           |    |     |     |        |        |        |      |      |
| HETATM11355 | H1 | PRP | 790 | 18.392 | 11.375 | 16.146 | 1.00 | 0.00 |
| H           |    |     |     |        |        |        |      |      |
| HETATM11356 | C1 | PRP | 790 | 19.107 | 9.701  | 16.141 | 1.00 | 0.00 |
| C           |    |     |     |        |        |        |      |      |
| HETATM11357 | H2 | PRP | 790 | 19.179 | 9.495  | 17.209 | 1.00 | 0.00 |
| H           |    |     |     |        |        |        |      |      |
| HETATM11358 | H3 | PRP | 790 | 18.956 | 8.794  | 15.556 | 1.00 | 0.00 |
| H           |    |     |     |        |        |        |      |      |
| HETATM11359 | C2 | PRP | 790 | 20.360 | 10.423 | 15.645 | 1.00 | 0.00 |
| C           |    |     |     |        |        |        |      |      |
| HETATM11360 | H4 | PRP | 790 | 21.146 | 9.830  | 16.112 | 1.00 | 0.00 |
| H           |    |     |     |        |        |        |      |      |
| HETATM11361 | O2 | PRP | 790 | 20.455 | 11.686 | 16.366 | 1.00 | 0.00 |
| O           |    |     |     |        |        |        |      |      |
| HETATM11362 | H5 | PRP | 790 | 19.874 | 12.347 | 15.983 | 1.00 | 0.00 |
| H           |    |     |     |        |        |        |      |      |
| HETATM11363 | C3 | PRP | 790 | 20.488 | 10.513 | 14.096 | 1.00 | 0.00 |
| C           |    |     |     |        |        |        |      |      |
| HETATM11364 | H6 | PRP | 790 | 21.353 | 11.096 | 13.781 | 1.00 | 0.00 |
| H           |    |     |     |        |        |        |      |      |
| HETATM11365 | H7 | PRP | 790 | 20.345 | 9.524  | 13.662 | 1.00 | 0.00 |
| H           |    |     |     |        |        |        |      |      |
| HETATM11366 | H8 | PRP | 790 | 19.691 | 11.177 | 13.761 | 1.00 | 0.00 |
| H           |    |     |     |        |        |        |      |      |
| HETATM11367 | O1 | PRP | 791 | 46.400 | 27.066 | 8.086  | 1.00 | 0.00 |
| O           |    |     |     |        |        |        |      |      |

|             |    |     |     |        |        |        |      |      |
|-------------|----|-----|-----|--------|--------|--------|------|------|
| HETATM11368 | H1 | PRP | 791 | 46.348 | 26.165 | 8.413  | 1.00 | 0.00 |
| H           |    |     |     |        |        |        |      |      |
| HETATM11369 | C1 | PRP | 791 | 45.637 | 27.126 | 6.927  | 1.00 | 0.00 |
| C           |    |     |     |        |        |        |      |      |
| HETATM11370 | H2 | PRP | 791 | 45.878 | 26.283 | 6.279  | 1.00 | 0.00 |
| H           |    |     |     |        |        |        |      |      |
| HETATM11371 | H3 | PRP | 791 | 44.577 | 26.989 | 7.144  | 1.00 | 0.00 |
| H           |    |     |     |        |        |        |      |      |
| HETATM11372 | C2 | PRP | 791 | 45.925 | 28.361 | 6.061  | 1.00 | 0.00 |
| C           |    |     |     |        |        |        |      |      |
| HETATM11373 | H4 | PRP | 791 | 45.242 | 28.237 | 5.221  | 1.00 | 0.00 |
| H           |    |     |     |        |        |        |      |      |
| HETATM11374 | O2 | PRP | 791 | 47.299 | 28.294 | 5.667  | 1.00 | 0.00 |
| O           |    |     |     |        |        |        |      |      |
| HETATM11375 | H5 | PRP | 791 | 47.714 | 27.608 | 6.195  | 1.00 | 0.00 |
| H           |    |     |     |        |        |        |      |      |
| HETATM11376 | C3 | PRP | 791 | 45.739 | 29.725 | 6.698  | 1.00 | 0.00 |
| C           |    |     |     |        |        |        |      |      |
| HETATM11377 | H6 | PRP | 791 | 46.619 | 29.991 | 7.283  | 1.00 | 0.00 |
| H           |    |     |     |        |        |        |      |      |
| HETATM11378 | H7 | PRP | 791 | 45.625 | 30.518 | 5.959  | 1.00 | 0.00 |
| H           |    |     |     |        |        |        |      |      |
| HETATM11379 | H8 | PRP | 791 | 44.854 | 29.754 | 7.334  | 1.00 | 0.00 |
| H           |    |     |     |        |        |        |      |      |
| HETATM11380 | O1 | PRP | 792 | 38.222 | 20.510 | 11.974 | 1.00 | 0.00 |
| O           |    |     |     |        |        |        |      |      |
| HETATM11381 | H1 | PRP | 792 | 38.470 | 21.210 | 11.366 | 1.00 | 0.00 |
| H           |    |     |     |        |        |        |      |      |
| HETATM11382 | C1 | PRP | 792 | 39.462 | 19.725 | 12.240 | 1.00 | 0.00 |
| C           |    |     |     |        |        |        |      |      |
| HETATM11383 | H2 | PRP | 792 | 39.342 | 19.124 | 13.141 | 1.00 | 0.00 |
| H           |    |     |     |        |        |        |      |      |
| HETATM11384 | H3 | PRP | 792 | 39.601 | 19.037 | 11.406 | 1.00 | 0.00 |
| H           |    |     |     |        |        |        |      |      |
| HETATM11385 | C2 | PRP | 792 | 40.660 | 20.647 | 12.478 | 1.00 | 0.00 |
| C           |    |     |     |        |        |        |      |      |
| HETATM11386 | H4 | PRP | 792 | 40.419 | 21.191 | 13.392 | 1.00 | 0.00 |
| H           |    |     |     |        |        |        |      |      |
| HETATM11387 | O2 | PRP | 792 | 40.775 | 21.603 | 11.467 | 1.00 | 0.00 |
| O           |    |     |     |        |        |        |      |      |
| HETATM11388 | H5 | PRP | 792 | 41.303 | 21.350 | 10.706 | 1.00 | 0.00 |
| H           |    |     |     |        |        |        |      |      |
| HETATM11389 | C3 | PRP | 792 | 41.851 | 19.723 | 12.713 | 1.00 | 0.00 |
| C           |    |     |     |        |        |        |      |      |
| HETATM11390 | H6 | PRP | 792 | 41.567 | 18.730 | 13.060 | 1.00 | 0.00 |
| H           |    |     |     |        |        |        |      |      |
| HETATM11391 | H7 | PRP | 792 | 42.415 | 19.592 | 11.790 | 1.00 | 0.00 |
| H           |    |     |     |        |        |        |      |      |
| HETATM11392 | H8 | PRP | 792 | 42.587 | 20.120 | 13.412 | 1.00 | 0.00 |
| H           |    |     |     |        |        |        |      |      |
| HETATM11393 | O1 | PRP | 793 | 21.769 | 15.356 | 13.674 | 1.00 | 0.00 |
| O           |    |     |     |        |        |        |      |      |
| HETATM11394 | H1 | PRP | 793 | 21.466 | 15.796 | 12.876 | 1.00 | 0.00 |
| H           |    |     |     |        |        |        |      |      |
| HETATM11395 | C1 | PRP | 793 | 22.281 | 14.123 | 13.276 | 1.00 | 0.00 |
| C           |    |     |     |        |        |        |      |      |

|             |    |     |     |        |        |        |      |      |
|-------------|----|-----|-----|--------|--------|--------|------|------|
| HETATM11396 | H2 | PRP | 793 | 23.362 | 14.187 | 13.157 | 1.00 | 0.00 |
| H           |    |     |     |        |        |        |      |      |
| HETATM11397 | H3 | PRP | 793 | 22.107 | 13.296 | 13.964 | 1.00 | 0.00 |
| H           |    |     |     |        |        |        |      |      |
| HETATM11398 | C2 | PRP | 793 | 21.739 | 13.772 | 11.871 | 1.00 | 0.00 |
| C           |    |     |     |        |        |        |      |      |
| HETATM11399 | H4 | PRP | 793 | 21.940 | 14.644 | 11.249 | 1.00 | 0.00 |
| H           |    |     |     |        |        |        |      |      |
| HETATM11400 | O2 | PRP | 793 | 20.350 | 13.535 | 12.020 | 1.00 | 0.00 |
| O           |    |     |     |        |        |        |      |      |
| HETATM11401 | H5 | PRP | 793 | 19.879 | 14.342 | 12.238 | 1.00 | 0.00 |
| H           |    |     |     |        |        |        |      |      |
| HETATM11402 | C3 | PRP | 793 | 22.395 | 12.555 | 11.224 | 1.00 | 0.00 |
| C           |    |     |     |        |        |        |      |      |
| HETATM11403 | H6 | PRP | 793 | 21.945 | 12.396 | 10.244 | 1.00 | 0.00 |
| H           |    |     |     |        |        |        |      |      |
| HETATM11404 | H7 | PRP | 793 | 23.453 | 12.754 | 11.054 | 1.00 | 0.00 |
| H           |    |     |     |        |        |        |      |      |
| HETATM11405 | H8 | PRP | 793 | 22.258 | 11.621 | 11.769 | 1.00 | 0.00 |
| H           |    |     |     |        |        |        |      |      |
| HETATM11406 | O1 | PRP | 794 | 35.010 | 12.071 | 11.098 | 1.00 | 0.00 |
| O           |    |     |     |        |        |        |      |      |
| HETATM11407 | H1 | PRP | 794 | 34.238 | 11.860 | 10.569 | 1.00 | 0.00 |
| H           |    |     |     |        |        |        |      |      |
| HETATM11408 | C1 | PRP | 794 | 34.727 | 13.162 | 11.913 | 1.00 | 0.00 |
| C           |    |     |     |        |        |        |      |      |
| HETATM11409 | H2 | PRP | 794 | 35.128 | 13.041 | 12.920 | 1.00 | 0.00 |
| H           |    |     |     |        |        |        |      |      |
| HETATM11410 | H3 | PRP | 794 | 35.063 | 14.079 | 11.429 | 1.00 | 0.00 |
| H           |    |     |     |        |        |        |      |      |
| HETATM11411 | C2 | PRP | 794 | 33.180 | 13.183 | 12.013 | 1.00 | 0.00 |
| C           |    |     |     |        |        |        |      |      |
| HETATM11412 | H4 | PRP | 794 | 32.859 | 13.029 | 13.043 | 1.00 | 0.00 |
| H           |    |     |     |        |        |        |      |      |
| HETATM11413 | O2 | PRP | 794 | 32.510 | 12.095 | 11.195 | 1.00 | 0.00 |
| O           |    |     |     |        |        |        |      |      |
| HETATM11414 | H5 | PRP | 794 | 32.637 | 11.234 | 11.599 | 1.00 | 0.00 |
| H           |    |     |     |        |        |        |      |      |
| HETATM11415 | C3 | PRP | 794 | 32.650 | 14.497 | 11.503 | 1.00 | 0.00 |
| C           |    |     |     |        |        |        |      |      |
| HETATM11416 | H6 | PRP | 794 | 32.930 | 14.676 | 10.464 | 1.00 | 0.00 |
| H           |    |     |     |        |        |        |      |      |
| HETATM11417 | H7 | PRP | 794 | 31.566 | 14.545 | 11.612 | 1.00 | 0.00 |
| H           |    |     |     |        |        |        |      |      |
| HETATM11418 | H8 | PRP | 794 | 33.183 | 15.299 | 12.012 | 1.00 | 0.00 |
| H           |    |     |     |        |        |        |      |      |
| HETATM11419 | O1 | PRP | 795 | 9.079  | 3.419  | 1.133  | 1.00 | 0.00 |
| O           |    |     |     |        |        |        |      |      |
| HETATM11420 | H1 | PRP | 795 | 9.035  | 2.752  | 0.444  | 1.00 | 0.00 |
| H           |    |     |     |        |        |        |      |      |
| HETATM11421 | C1 | PRP | 795 | 10.206 | 3.246  | 2.006  | 1.00 | 0.00 |
| C           |    |     |     |        |        |        |      |      |
| HETATM11422 | H2 | PRP | 795 | 10.279 | 2.182  | 2.235  | 1.00 | 0.00 |
| H           |    |     |     |        |        |        |      |      |
| HETATM11423 | H3 | PRP | 795 | 11.111 | 3.291  | 1.400  | 1.00 | 0.00 |
| H           |    |     |     |        |        |        |      |      |

|             |    |     |     |        |        |       |      |      |
|-------------|----|-----|-----|--------|--------|-------|------|------|
| HETATM11424 | C2 | PRP | 795 | 10.263 | 4.189  | 3.283 | 1.00 | 0.00 |
| C           |    |     |     |        |        |       |      |      |
| HETATM11425 | H4 | PRP | 795 | 11.185 | 3.911  | 3.792 | 1.00 | 0.00 |
| H           |    |     |     |        |        |       |      |      |
| HETATM11426 | O2 | PRP | 795 | 9.138  | 3.986  | 4.024 | 1.00 | 0.00 |
| O           |    |     |     |        |        |       |      |      |
| HETATM11427 | H5 | PRP | 795 | 8.456  | 4.281  | 3.416 | 1.00 | 0.00 |
| H           |    |     |     |        |        |       |      |      |
| HETATM11428 | C3 | PRP | 795 | 10.356 | 5.700  | 3.031 | 1.00 | 0.00 |
| C           |    |     |     |        |        |       |      |      |
| HETATM11429 | H6 | PRP | 795 | 10.337 | 6.235  | 3.981 | 1.00 | 0.00 |
| H           |    |     |     |        |        |       |      |      |
| HETATM11430 | H7 | PRP | 795 | 11.304 | 5.901  | 2.533 | 1.00 | 0.00 |
| H           |    |     |     |        |        |       |      |      |
| HETATM11431 | H8 | PRP | 795 | 9.700  | 6.115  | 2.265 | 1.00 | 0.00 |
| H           |    |     |     |        |        |       |      |      |
| HETATM11432 | O1 | PRP | 796 | 17.776 | 19.163 | 0.550 | 1.00 | 0.00 |
| O           |    |     |     |        |        |       |      |      |
| HETATM11433 | H1 | PRP | 796 | 18.221 | 19.978 | 0.305 | 1.00 | 0.00 |
| H           |    |     |     |        |        |       |      |      |
| HETATM11434 | C1 | PRP | 796 | 17.166 | 19.185 | 1.842 | 1.00 | 0.00 |
| C           |    |     |     |        |        |       |      |      |
| HETATM11435 | H2 | PRP | 796 | 17.899 | 19.250 | 2.646 | 1.00 | 0.00 |
| H           |    |     |     |        |        |       |      |      |
| HETATM11436 | H3 | PRP | 796 | 16.599 | 20.109 | 1.955 | 1.00 | 0.00 |
| H           |    |     |     |        |        |       |      |      |
| HETATM11437 | C2 | PRP | 796 | 16.257 | 17.953 | 2.116 | 1.00 | 0.00 |
| C           |    |     |     |        |        |       |      |      |
| HETATM11438 | H4 | PRP | 796 | 16.766 | 17.014 | 1.898 | 1.00 | 0.00 |
| H           |    |     |     |        |        |       |      |      |
| HETATM11439 | O2 | PRP | 796 | 15.106 | 18.037 | 1.262 | 1.00 | 0.00 |
| O           |    |     |     |        |        |       |      |      |
| HETATM11440 | H5 | PRP | 796 | 15.309 | 18.273 | 0.353 | 1.00 | 0.00 |
| H           |    |     |     |        |        |       |      |      |
| HETATM11441 | C3 | PRP | 796 | 15.775 | 17.880 | 3.572 | 1.00 | 0.00 |
| C           |    |     |     |        |        |       |      |      |
| HETATM11442 | H6 | PRP | 796 | 16.584 | 17.580 | 4.238 | 1.00 | 0.00 |
| H           |    |     |     |        |        |       |      |      |
| HETATM11443 | H7 | PRP | 796 | 15.277 | 18.782 | 3.926 | 1.00 | 0.00 |
| H           |    |     |     |        |        |       |      |      |
| HETATM11444 | H8 | PRP | 796 | 14.999 | 17.117 | 3.615 | 1.00 | 0.00 |
| H           |    |     |     |        |        |       |      |      |
| HETATM11445 | O1 | PRP | 797 | 29.080 | 22.446 | 5.489 | 1.00 | 0.00 |
| O           |    |     |     |        |        |       |      |      |
| HETATM11446 | H1 | PRP | 797 | 28.545 | 21.742 | 5.114 | 1.00 | 0.00 |
| H           |    |     |     |        |        |       |      |      |
| HETATM11447 | C1 | PRP | 797 | 28.578 | 22.694 | 6.782 | 1.00 | 0.00 |
| C           |    |     |     |        |        |       |      |      |
| HETATM11448 | H2 | PRP | 797 | 29.043 | 23.645 | 7.044 | 1.00 | 0.00 |
| H           |    |     |     |        |        |       |      |      |
| HETATM11449 | H3 | PRP | 797 | 27.490 | 22.702 | 6.723 | 1.00 | 0.00 |
| H           |    |     |     |        |        |       |      |      |
| HETATM11450 | C2 | PRP | 797 | 29.039 | 21.682 | 7.823 | 1.00 | 0.00 |
| C           |    |     |     |        |        |       |      |      |
| HETATM11451 | H4 | PRP | 797 | 28.658 | 22.019 | 8.787 | 1.00 | 0.00 |
| H           |    |     |     |        |        |       |      |      |

|             |    |     |     |        |        |        |      |      |
|-------------|----|-----|-----|--------|--------|--------|------|------|
| HETATM11452 | O2 | PRP | 797 | 30.415 | 21.689 | 7.899  | 1.00 | 0.00 |
| O           |    |     |     |        |        |        |      |      |
| HETATM11453 | H5 | PRP | 797 | 30.735 | 21.485 | 7.018  | 1.00 | 0.00 |
| H           |    |     |     |        |        |        |      |      |
| HETATM11454 | C3 | PRP | 797 | 28.639 | 20.270 | 7.463  | 1.00 | 0.00 |
| C           |    |     |     |        |        |        |      |      |
| HETATM11455 | H6 | PRP | 797 | 29.217 | 19.921 | 6.607  | 1.00 | 0.00 |
| H           |    |     |     |        |        |        |      |      |
| HETATM11456 | H7 | PRP | 797 | 28.904 | 19.626 | 8.302  | 1.00 | 0.00 |
| H           |    |     |     |        |        |        |      |      |
| HETATM11457 | H8 | PRP | 797 | 27.556 | 20.204 | 7.365  | 1.00 | 0.00 |
| H           |    |     |     |        |        |        |      |      |
| HETATM11458 | O1 | PRP | 798 | 57.355 | 22.138 | 12.186 | 1.00 | 0.00 |
| O           |    |     |     |        |        |        |      |      |
| HETATM11459 | H1 | PRP | 798 | 57.909 | 22.050 | 12.965 | 1.00 | 0.00 |
| H           |    |     |     |        |        |        |      |      |
| HETATM11460 | C1 | PRP | 798 | 56.306 | 21.158 | 12.210 | 1.00 | 0.00 |
| C           |    |     |     |        |        |        |      |      |
| HETATM11461 | H2 | PRP | 798 | 56.714 | 20.171 | 12.427 | 1.00 | 0.00 |
| H           |    |     |     |        |        |        |      |      |
| HETATM11462 | H3 | PRP | 798 | 55.706 | 21.435 | 13.077 | 1.00 | 0.00 |
| H           |    |     |     |        |        |        |      |      |
| HETATM11463 | C2 | PRP | 798 | 55.495 | 21.191 | 10.930 | 1.00 | 0.00 |
| C           |    |     |     |        |        |        |      |      |
| HETATM11464 | H4 | PRP | 798 | 56.197 | 21.215 | 10.096 | 1.00 | 0.00 |
| H           |    |     |     |        |        |        |      |      |
| HETATM11465 | O2 | PRP | 798 | 54.732 | 22.272 | 10.895 | 1.00 | 0.00 |
| O           |    |     |     |        |        |        |      |      |
| HETATM11466 | H5 | PRP | 798 | 54.852 | 22.735 | 10.063 | 1.00 | 0.00 |
| H           |    |     |     |        |        |        |      |      |
| HETATM11467 | C3 | PRP | 798 | 54.555 | 20.020 | 10.818 | 1.00 | 0.00 |
| C           |    |     |     |        |        |        |      |      |
| HETATM11468 | H6 | PRP | 798 | 53.966 | 20.066 | 9.902  | 1.00 | 0.00 |
| H           |    |     |     |        |        |        |      |      |
| HETATM11469 | H7 | PRP | 798 | 55.059 | 19.054 | 10.849 | 1.00 | 0.00 |
| H           |    |     |     |        |        |        |      |      |
| HETATM11470 | H8 | PRP | 798 | 53.858 | 20.056 | 11.655 | 1.00 | 0.00 |
| H           |    |     |     |        |        |        |      |      |
| HETATM11471 | O1 | PRP | 799 | 48.204 | 30.049 | 3.755  | 1.00 | 0.00 |
| O           |    |     |     |        |        |        |      |      |
| HETATM11472 | H1 | PRP | 799 | 48.021 | 29.446 | 4.479  | 1.00 | 0.00 |
| H           |    |     |     |        |        |        |      |      |
| HETATM11473 | C1 | PRP | 799 | 47.540 | 29.580 | 2.553  | 1.00 | 0.00 |
| C           |    |     |     |        |        |        |      |      |
| HETATM11474 | H2 | PRP | 799 | 48.074 | 28.659 | 2.322  | 1.00 | 0.00 |
| H           |    |     |     |        |        |        |      |      |
| HETATM11475 | H3 | PRP | 799 | 46.496 | 29.338 | 2.751  | 1.00 | 0.00 |
| H           |    |     |     |        |        |        |      |      |
| HETATM11476 | C2 | PRP | 799 | 47.580 | 30.585 | 1.396  | 1.00 | 0.00 |
| C           |    |     |     |        |        |        |      |      |
| HETATM11477 | H4 | PRP | 799 | 48.600 | 30.965 | 1.460  | 1.00 | 0.00 |
| H           |    |     |     |        |        |        |      |      |
| HETATM11478 | O2 | PRP | 799 | 46.692 | 31.649 | 1.782  | 1.00 | 0.00 |
| O           |    |     |     |        |        |        |      |      |
| HETATM11479 | H5 | PRP | 799 | 46.901 | 31.972 | 2.661  | 1.00 | 0.00 |
| H           |    |     |     |        |        |        |      |      |

|             |    |     |     |        |        |        |      |      |
|-------------|----|-----|-----|--------|--------|--------|------|------|
| HETATM11480 | C3 | PRP | 799 | 47.139 | 29.955 | 0.039  | 1.00 | 0.00 |
| C           |    |     |     |        |        |        |      |      |
| HETATM11481 | H6 | PRP | 799 | 46.056 | 29.981 | -0.079 | 1.00 | 0.00 |
| H           |    |     |     |        |        |        |      |      |
| HETATM11482 | H7 | PRP | 799 | 47.634 | 30.555 | -0.726 | 1.00 | 0.00 |
| H           |    |     |     |        |        |        |      |      |
| HETATM11483 | H8 | PRP | 799 | 47.414 | 28.911 | -0.112 | 1.00 | 0.00 |
| H           |    |     |     |        |        |        |      |      |
| HETATM11484 | O1 | PRP | 800 | 19.577 | 4.154  | 4.958  | 1.00 | 0.00 |
| O           |    |     |     |        |        |        |      |      |
| HETATM11485 | H1 | PRP | 800 | 19.540 | 3.217  | 4.751  | 1.00 | 0.00 |
| H           |    |     |     |        |        |        |      |      |
| HETATM11486 | C1 | PRP | 800 | 20.066 | 4.718  | 3.792  | 1.00 | 0.00 |
| C           |    |     |     |        |        |        |      |      |
| HETATM11487 | H2 | PRP | 800 | 19.656 | 5.726  | 3.731  | 1.00 | 0.00 |
| H           |    |     |     |        |        |        |      |      |
| HETATM11488 | H3 | PRP | 800 | 21.148 | 4.822  | 3.877  | 1.00 | 0.00 |
| H           |    |     |     |        |        |        |      |      |
| HETATM11489 | C2 | PRP | 800 | 19.626 | 3.860  | 2.604  | 1.00 | 0.00 |
| C           |    |     |     |        |        |        |      |      |
| HETATM11490 | H4 | PRP | 800 | 18.622 | 4.182  | 2.329  | 1.00 | 0.00 |
| H           |    |     |     |        |        |        |      |      |
| HETATM11491 | O2 | PRP | 800 | 19.834 | 2.513  | 2.970  | 1.00 | 0.00 |
| O           |    |     |     |        |        |        |      |      |
| HETATM11492 | H5 | PRP | 800 | 19.761 | 1.956  | 2.191  | 1.00 | 0.00 |
| H           |    |     |     |        |        |        |      |      |
| HETATM11493 | C3 | PRP | 800 | 20.575 | 4.345  | 1.438  | 1.00 | 0.00 |
| C           |    |     |     |        |        |        |      |      |
| HETATM11494 | H6 | PRP | 800 | 21.552 | 3.890  | 1.600  | 1.00 | 0.00 |
| H           |    |     |     |        |        |        |      |      |
| HETATM11495 | H7 | PRP | 800 | 20.170 | 3.881  | 0.539  | 1.00 | 0.00 |
| H           |    |     |     |        |        |        |      |      |
| HETATM11496 | H8 | PRP | 800 | 20.652 | 5.424  | 1.299  | 1.00 | 0.00 |
| H           |    |     |     |        |        |        |      |      |
| HETATM11497 | O1 | PRP | 801 | 2.205  | 6.969  | 3.455  | 1.00 | 0.00 |
| O           |    |     |     |        |        |        |      |      |
| HETATM11498 | H1 | PRP | 801 | 1.316  | 7.181  | 3.750  | 1.00 | 0.00 |
| H           |    |     |     |        |        |        |      |      |
| HETATM11499 | C1 | PRP | 801 | 2.928  | 8.193  | 3.562  | 1.00 | 0.00 |
| C           |    |     |     |        |        |        |      |      |
| HETATM11500 | H2 | PRP | 801 | 3.954  | 7.956  | 3.842  | 1.00 | 0.00 |
| H           |    |     |     |        |        |        |      |      |
| HETATM11501 | H3 | PRP | 801 | 2.956  | 8.739  | 2.619  | 1.00 | 0.00 |
| H           |    |     |     |        |        |        |      |      |
| HETATM11502 | C2 | PRP | 801 | 2.246  | 9.074  | 4.621  | 1.00 | 0.00 |
| C           |    |     |     |        |        |        |      |      |
| HETATM11503 | H4 | PRP | 801 | 2.227  | 8.670  | 5.634  | 1.00 | 0.00 |
| H           |    |     |     |        |        |        |      |      |
| HETATM11504 | O2 | PRP | 801 | 0.885  | 9.384  | 4.321  | 1.00 | 0.00 |
| O           |    |     |     |        |        |        |      |      |
| HETATM11505 | H5 | PRP | 801 | 0.689  | 9.692  | 3.433  | 1.00 | 0.00 |
| H           |    |     |     |        |        |        |      |      |
| HETATM11506 | C3 | PRP | 801 | 2.961  | 10.414 | 4.733  | 1.00 | 0.00 |
| C           |    |     |     |        |        |        |      |      |
| HETATM11507 | H6 | PRP | 801 | 2.928  | 10.784 | 5.758  | 1.00 | 0.00 |
| H           |    |     |     |        |        |        |      |      |

|             |    |     |     |        |        |        |      |      |
|-------------|----|-----|-----|--------|--------|--------|------|------|
| HETATM11508 | H7 | PRP | 801 | 3.991  | 10.212 | 4.442  | 1.00 | 0.00 |
| H           |    |     |     |        |        |        |      |      |
| HETATM11509 | H8 | PRP | 801 | 2.560  | 11.165 | 4.052  | 1.00 | 0.00 |
| H           |    |     |     |        |        |        |      |      |
| HETATM11510 | O1 | PRP | 802 | 12.043 | 5.486  | 6.613  | 1.00 | 0.00 |
| O           |    |     |     |        |        |        |      |      |
| HETATM11511 | H1 | PRP | 802 | 11.770 | 5.277  | 7.510  | 1.00 | 0.00 |
| H           |    |     |     |        |        |        |      |      |
| HETATM11512 | C1 | PRP | 802 | 12.695 | 6.678  | 6.703  | 1.00 | 0.00 |
| C           |    |     |     |        |        |        |      |      |
| HETATM11513 | H2 | PRP | 802 | 13.479 | 6.852  | 5.966  | 1.00 | 0.00 |
| H           |    |     |     |        |        |        |      |      |
| HETATM11514 | H3 | PRP | 802 | 12.013 | 7.526  | 6.643  | 1.00 | 0.00 |
| H           |    |     |     |        |        |        |      |      |
| HETATM11515 | C2 | PRP | 802 | 13.373 | 6.632  | 8.069  | 1.00 | 0.00 |
| C           |    |     |     |        |        |        |      |      |
| HETATM11516 | H4 | PRP | 802 | 14.093 | 5.826  | 8.214  | 1.00 | 0.00 |
| H           |    |     |     |        |        |        |      |      |
| HETATM11517 | O2 | PRP | 802 | 12.371 | 6.532  | 9.125  | 1.00 | 0.00 |
| O           |    |     |     |        |        |        |      |      |
| HETATM11518 | H5 | PRP | 802 | 12.883 | 6.428  | 9.930  | 1.00 | 0.00 |
| H           |    |     |     |        |        |        |      |      |
| HETATM11519 | C3 | PRP | 802 | 14.161 | 7.954  | 8.242  | 1.00 | 0.00 |
| C           |    |     |     |        |        |        |      |      |
| HETATM11520 | H6 | PRP | 802 | 13.455 | 8.768  | 8.409  | 1.00 | 0.00 |
| H           |    |     |     |        |        |        |      |      |
| HETATM11521 | H7 | PRP | 802 | 14.838 | 7.935  | 9.096  | 1.00 | 0.00 |
| H           |    |     |     |        |        |        |      |      |
| HETATM11522 | H8 | PRP | 802 | 14.654 | 8.283  | 7.327  | 1.00 | 0.00 |
| H           |    |     |     |        |        |        |      |      |
| HETATM11523 | O1 | PRP | 803 | 17.611 | 8.766  | 13.255 | 1.00 | 0.00 |
| O           |    |     |     |        |        |        |      |      |
| HETATM11524 | H1 | PRP | 803 | 17.533 | 9.534  | 13.827 | 1.00 | 0.00 |
| H           |    |     |     |        |        |        |      |      |
| HETATM11525 | C1 | PRP | 803 | 17.735 | 9.117  | 11.959 | 1.00 | 0.00 |
| C           |    |     |     |        |        |        |      |      |
| HETATM11526 | H2 | PRP | 803 | 18.820 | 9.118  | 11.856 | 1.00 | 0.00 |
| H           |    |     |     |        |        |        |      |      |
| HETATM11527 | H3 | PRP | 803 | 17.186 | 8.375  | 11.379 | 1.00 | 0.00 |
| H           |    |     |     |        |        |        |      |      |
| HETATM11528 | C2 | PRP | 803 | 17.079 | 10.488 | 11.712 | 1.00 | 0.00 |
| C           |    |     |     |        |        |        |      |      |
| HETATM11529 | H4 | PRP | 803 | 16.977 | 11.004 | 12.667 | 1.00 | 0.00 |
| H           |    |     |     |        |        |        |      |      |
| HETATM11530 | O2 | PRP | 803 | 15.706 | 10.579 | 11.337 | 1.00 | 0.00 |
| O           |    |     |     |        |        |        |      |      |
| HETATM11531 | H5 | PRP | 803 | 15.154 | 10.508 | 12.120 | 1.00 | 0.00 |
| H           |    |     |     |        |        |        |      |      |
| HETATM11532 | C3 | PRP | 803 | 17.852 | 11.468 | 10.892 | 1.00 | 0.00 |
| C           |    |     |     |        |        |        |      |      |
| HETATM11533 | H6 | PRP | 803 | 17.312 | 12.414 | 10.864 | 1.00 | 0.00 |
| H           |    |     |     |        |        |        |      |      |
| HETATM11534 | H7 | PRP | 803 | 18.824 | 11.586 | 11.371 | 1.00 | 0.00 |
| H           |    |     |     |        |        |        |      |      |
| HETATM11535 | H8 | PRP | 803 | 17.955 | 11.124 | 9.863  | 1.00 | 0.00 |
| H           |    |     |     |        |        |        |      |      |

|             |    |     |     |        |        |        |      |      |
|-------------|----|-----|-----|--------|--------|--------|------|------|
| HETATM11536 | O1 | PRP | 804 | 15.447 | 29.451 | 3.241  | 1.00 | 0.00 |
| O           |    |     |     |        |        |        |      |      |
| HETATM11537 | H1 | PRP | 804 | 15.119 | 28.610 | 2.912  | 1.00 | 0.00 |
| H           |    |     |     |        |        |        |      |      |
| HETATM11538 | C1 | PRP | 804 | 16.867 | 29.614 | 3.249  | 1.00 | 0.00 |
| C           |    |     |     |        |        |        |      |      |
| HETATM11539 | H2 | PRP | 804 | 17.103 | 29.291 | 4.263  | 1.00 | 0.00 |
| H           |    |     |     |        |        |        |      |      |
| HETATM11540 | H3 | PRP | 804 | 17.422 | 29.033 | 2.512  | 1.00 | 0.00 |
| H           |    |     |     |        |        |        |      |      |
| HETATM11541 | C2 | PRP | 804 | 17.267 | 31.040 | 3.127  | 1.00 | 0.00 |
| C           |    |     |     |        |        |        |      |      |
| HETATM11542 | H4 | PRP | 804 | 16.714 | 31.660 | 3.832  | 1.00 | 0.00 |
| H           |    |     |     |        |        |        |      |      |
| HETATM11543 | O2 | PRP | 804 | 16.943 | 31.412 | 1.863  | 1.00 | 0.00 |
| O           |    |     |     |        |        |        |      |      |
| HETATM11544 | H5 | PRP | 804 | 15.992 | 31.445 | 1.733  | 1.00 | 0.00 |
| H           |    |     |     |        |        |        |      |      |
| HETATM11545 | C3 | PRP | 804 | 18.738 | 31.377 | 3.340  | 1.00 | 0.00 |
| C           |    |     |     |        |        |        |      |      |
| HETATM11546 | H6 | PRP | 804 | 19.342 | 30.664 | 2.780  | 1.00 | 0.00 |
| H           |    |     |     |        |        |        |      |      |
| HETATM11547 | H7 | PRP | 804 | 19.035 | 32.368 | 2.997  | 1.00 | 0.00 |
| H           |    |     |     |        |        |        |      |      |
| HETATM11548 | H8 | PRP | 804 | 19.002 | 31.322 | 4.396  | 1.00 | 0.00 |
| H           |    |     |     |        |        |        |      |      |
| HETATM11549 | O1 | PRP | 805 | 23.910 | 33.563 | 10.623 | 1.00 | 0.00 |
| O           |    |     |     |        |        |        |      |      |
| HETATM11550 | H1 | PRP | 805 | 24.137 | 33.787 | 11.528 | 1.00 | 0.00 |
| H           |    |     |     |        |        |        |      |      |
| HETATM11551 | C1 | PRP | 805 | 24.762 | 32.451 | 10.356 | 1.00 | 0.00 |
| C           |    |     |     |        |        |        |      |      |
| HETATM11552 | H2 | PRP | 805 | 24.979 | 31.922 | 11.284 | 1.00 | 0.00 |
| H           |    |     |     |        |        |        |      |      |
| HETATM11553 | H3 | PRP | 805 | 24.301 | 31.807 | 9.607  | 1.00 | 0.00 |
| H           |    |     |     |        |        |        |      |      |
| HETATM11554 | C2 | PRP | 805 | 26.138 | 32.909 | 9.934  | 1.00 | 0.00 |
| C           |    |     |     |        |        |        |      |      |
| HETATM11555 | H4 | PRP | 805 | 26.777 | 32.229 | 10.497 | 1.00 | 0.00 |
| H           |    |     |     |        |        |        |      |      |
| HETATM11556 | O2 | PRP | 805 | 26.408 | 34.227 | 10.000 | 1.00 | 0.00 |
| O           |    |     |     |        |        |        |      |      |
| HETATM11557 | H5 | PRP | 805 | 26.350 | 34.472 | 10.926 | 1.00 | 0.00 |
| H           |    |     |     |        |        |        |      |      |
| HETATM11558 | C3 | PRP | 805 | 26.441 | 32.442 | 8.475  | 1.00 | 0.00 |
| C           |    |     |     |        |        |        |      |      |
| HETATM11559 | H6 | PRP | 805 | 26.472 | 31.353 | 8.428  | 1.00 | 0.00 |
| H           |    |     |     |        |        |        |      |      |
| HETATM11560 | H7 | PRP | 805 | 25.701 | 32.700 | 7.718  | 1.00 | 0.00 |
| H           |    |     |     |        |        |        |      |      |
| HETATM11561 | H8 | PRP | 805 | 27.464 | 32.776 | 8.303  | 1.00 | 0.00 |
| H           |    |     |     |        |        |        |      |      |
| HETATM11562 | O1 | PRP | 806 | 31.860 | 32.987 | 9.446  | 1.00 | 0.00 |
| O           |    |     |     |        |        |        |      |      |
| HETATM11563 | H1 | PRP | 806 | 31.992 | 33.921 | 9.270  | 1.00 | 0.00 |
| H           |    |     |     |        |        |        |      |      |



|             |    |     |     |        |         |        |      |      |
|-------------|----|-----|-----|--------|---------|--------|------|------|
| HETATM11564 | C1 | PRP | 806 | 30.693 | 32.817  | 10.143 | 1.00 | 0.00 |
| C           |    |     |     |        |         |        |      |      |
| HETATM11565 | H2 | PRP | 806 | 29.852 | 33.278  | 9.625  | 1.00 | 0.00 |
| H           |    |     |     |        |         |        |      |      |
| HETATM11566 | H3 | PRP | 806 | 30.509 | 31.743  | 10.137 | 1.00 | 0.00 |
| H           |    |     |     |        |         |        |      |      |
| HETATM11567 | C2 | PRP | 806 | 30.654 | 33.292  | 11.615 | 1.00 | 0.00 |
| C           |    |     |     |        |         |        |      |      |
| HETATM11568 | H4 | PRP | 806 | 30.794 | 34.370  | 11.692 | 1.00 | 0.00 |
| H           |    |     |     |        |         |        |      |      |
| HETATM11569 | O2 | PRP | 806 | 31.535 | 32.601  | 12.518 | 1.00 | 0.00 |
| O           |    |     |     |        |         |        |      |      |
| HETATM11570 | H5 | PRP | 806 | 31.355 | 32.974  | 13.384 | 1.00 | 0.00 |
| H           |    |     |     |        |         |        |      |      |
| HETATM11571 | C3 | PRP | 806 | 29.264 | 33.119  | 12.122 | 1.00 | 0.00 |
| C           |    |     |     |        |         |        |      |      |
| HETATM11572 | H6 | PRP | 806 | 29.079 | 32.045  | 12.105 | 1.00 | 0.00 |
| H           |    |     |     |        |         |        |      |      |
| HETATM11573 | H7 | PRP | 806 | 29.120 | 33.459  | 13.147 | 1.00 | 0.00 |
| H           |    |     |     |        |         |        |      |      |
| HETATM11574 | H8 | PRP | 806 | 28.657 | 33.751  | 11.475 | 1.00 | 0.00 |
| H           |    |     |     |        |         |        |      |      |
| HETATM11575 | O1 | PRP | 807 | 16.883 | -10.229 | 5.967  | 1.00 | 0.00 |
| O           |    |     |     |        |         |        |      |      |
| HETATM11576 | H1 | PRP | 807 | 16.728 | -9.937  | 6.868  | 1.00 | 0.00 |
| H           |    |     |     |        |         |        |      |      |
| HETATM11577 | C1 | PRP | 807 | 18.101 | -10.839 | 6.018  | 1.00 | 0.00 |
| C           |    |     |     |        |         |        |      |      |
| HETATM11578 | H2 | PRP | 807 | 18.875 | -10.123 | 6.294  | 1.00 | 0.00 |
| H           |    |     |     |        |         |        |      |      |
| HETATM11579 | H3 | PRP | 807 | 18.069 | -11.734 | 6.640  | 1.00 | 0.00 |
| H           |    |     |     |        |         |        |      |      |
| HETATM11580 | C2 | PRP | 807 | 18.485 | -11.390 | 4.649  | 1.00 | 0.00 |
| C           |    |     |     |        |         |        |      |      |
| HETATM11581 | H4 | PRP | 807 | 18.571 | -10.507 | 4.016  | 1.00 | 0.00 |
| H           |    |     |     |        |         |        |      |      |
| HETATM11582 | O2 | PRP | 807 | 17.661 | -12.245 | 4.011  | 1.00 | 0.00 |
| O           |    |     |     |        |         |        |      |      |
| HETATM11583 | H5 | PRP | 807 | 16.859 | -11.804 | 3.720  | 1.00 | 0.00 |
| H           |    |     |     |        |         |        |      |      |
| HETATM11584 | C3 | PRP | 807 | 19.893 | -12.074 | 4.823  | 1.00 | 0.00 |
| C           |    |     |     |        |         |        |      |      |
| HETATM11585 | H6 | PRP | 807 | 20.517 | -11.280 | 5.232  | 1.00 | 0.00 |
| H           |    |     |     |        |         |        |      |      |
| HETATM11586 | H7 | PRP | 807 | 19.835 | -12.891 | 5.542  | 1.00 | 0.00 |
| H           |    |     |     |        |         |        |      |      |
| HETATM11587 | H8 | PRP | 807 | 20.313 | -12.420 | 3.878  | 1.00 | 0.00 |
| H           |    |     |     |        |         |        |      |      |
| HETATM11588 | O1 | PRP | 808 | 17.862 | -14.194 | 7.757  | 1.00 | 0.00 |
| O           |    |     |     |        |         |        |      |      |
| HETATM11589 | H1 | PRP | 808 | 18.471 | -13.643 | 7.260  | 1.00 | 0.00 |
| H           |    |     |     |        |         |        |      |      |
| HETATM11590 | C1 | PRP | 808 | 18.145 | -13.874 | 9.087  | 1.00 | 0.00 |
| C           |    |     |     |        |         |        |      |      |
| HETATM11591 | H2 | PRP | 808 | 17.249 | -13.957 | 9.702  | 1.00 | 0.00 |
| H           |    |     |     |        |         |        |      |      |

|             |    |     |     |        |         |        |      |      |
|-------------|----|-----|-----|--------|---------|--------|------|------|
| HETATM11592 | H3 | PRP | 808 | 18.994 | -14.522 | 9.304  | 1.00 | 0.00 |
| H           |    |     |     |        |         |        |      |      |
| HETATM11593 | C2 | PRP | 808 | 18.671 | -12.408 | 9.243  | 1.00 | 0.00 |
| C           |    |     |     |        |         |        |      |      |
| HETATM11594 | H4 | PRP | 808 | 17.908 | -11.710 | 8.900  | 1.00 | 0.00 |
| H           |    |     |     |        |         |        |      |      |
| HETATM11595 | O2 | PRP | 808 | 19.851 | -12.238 | 8.493  | 1.00 | 0.00 |
| O           |    |     |     |        |         |        |      |      |
| HETATM11596 | H5 | PRP | 808 | 20.201 | -11.363 | 8.676  | 1.00 | 0.00 |
| H           |    |     |     |        |         |        |      |      |
| HETATM11597 | C3 | PRP | 808 | 18.864 | -12.126 | 10.806 | 1.00 | 0.00 |
| C           |    |     |     |        |         |        |      |      |
| HETATM11598 | H6 | PRP | 808 | 17.984 | -12.385 | 11.396 | 1.00 | 0.00 |
| H           |    |     |     |        |         |        |      |      |
| HETATM11599 | H7 | PRP | 808 | 19.634 | -12.824 | 11.136 | 1.00 | 0.00 |
| H           |    |     |     |        |         |        |      |      |
| HETATM11600 | H8 | PRP | 808 | 19.207 | -11.102 | 10.949 | 1.00 | 0.00 |
| H           |    |     |     |        |         |        |      |      |
| HETATM11601 | O1 | PRP | 809 | 14.357 | 4.204   | 1.762  | 1.00 | 0.00 |
| O           |    |     |     |        |         |        |      |      |
| HETATM11602 | H1 | PRP | 809 | 14.378 | 3.280   | 1.504  | 1.00 | 0.00 |
| H           |    |     |     |        |         |        |      |      |
| HETATM11603 | C1 | PRP | 809 | 14.292 | 4.393   | 3.194  | 1.00 | 0.00 |
| C           |    |     |     |        |         |        |      |      |
| HETATM11604 | H2 | PRP | 809 | 14.411 | 5.409   | 3.571  | 1.00 | 0.00 |
| H           |    |     |     |        |         |        |      |      |
| HETATM11605 | H3 | PRP | 809 | 13.297 | 4.072   | 3.502  | 1.00 | 0.00 |
| H           |    |     |     |        |         |        |      |      |
| HETATM11606 | C2 | PRP | 809 | 15.312 | 3.455   | 3.952  | 1.00 | 0.00 |
| C           |    |     |     |        |         |        |      |      |
| HETATM11607 | H4 | PRP | 809 | 16.337 | 3.559   | 3.596  | 1.00 | 0.00 |
| H           |    |     |     |        |         |        |      |      |
| HETATM11608 | O2 | PRP | 809 | 14.922 | 2.089   | 3.689  | 1.00 | 0.00 |
| O           |    |     |     |        |         |        |      |      |
| HETATM11609 | H5 | PRP | 809 | 15.408 | 1.375   | 4.109  | 1.00 | 0.00 |
| H           |    |     |     |        |         |        |      |      |
| HETATM11610 | C3 | PRP | 809 | 15.323 | 3.722   | 5.421  | 1.00 | 0.00 |
| C           |    |     |     |        |         |        |      |      |
| HETATM11611 | H6 | PRP | 809 | 14.620 | 3.052   | 5.914  | 1.00 | 0.00 |
| H           |    |     |     |        |         |        |      |      |
| HETATM11612 | H7 | PRP | 809 | 16.341 | 3.584   | 5.786  | 1.00 | 0.00 |
| H           |    |     |     |        |         |        |      |      |
| HETATM11613 | H8 | PRP | 809 | 14.884 | 4.698   | 5.625  | 1.00 | 0.00 |
| H           |    |     |     |        |         |        |      |      |
| HETATM11614 | O1 | PRP | 810 | 14.169 | 16.243  | 8.019  | 1.00 | 0.00 |
| O           |    |     |     |        |         |        |      |      |
| HETATM11615 | H1 | PRP | 810 | 14.459 | 15.548  | 7.424  | 1.00 | 0.00 |
| H           |    |     |     |        |         |        |      |      |
| HETATM11616 | C1 | PRP | 810 | 13.971 | 17.439  | 7.280  | 1.00 | 0.00 |
| C           |    |     |     |        |         |        |      |      |
| HETATM11617 | H2 | PRP | 810 | 14.536 | 18.270  | 7.702  | 1.00 | 0.00 |
| H           |    |     |     |        |         |        |      |      |
| HETATM11618 | H3 | PRP | 810 | 14.389 | 17.245  | 6.293  | 1.00 | 0.00 |
| H           |    |     |     |        |         |        |      |      |
| HETATM11619 | C2 | PRP | 810 | 12.491 | 17.892  | 7.050  | 1.00 | 0.00 |
| C           |    |     |     |        |         |        |      |      |

|             |    |     |     |        |        |        |      |      |
|-------------|----|-----|-----|--------|--------|--------|------|------|
| HETATM11620 | H4 | PRP | 810 | 12.518 | 18.883 | 6.597  | 1.00 | 0.00 |
| H           |    |     |     |        |        |        |      |      |
| HETATM11621 | O2 | PRP | 810 | 11.831 | 17.958 | 8.236  | 1.00 | 0.00 |
| O           |    |     |     |        |        |        |      |      |
| HETATM11622 | H5 | PRP | 810 | 12.365 | 18.401 | 8.900  | 1.00 | 0.00 |
| H           |    |     |     |        |        |        |      |      |
| HETATM11623 | C3 | PRP | 810 | 11.856 | 16.903 | 6.042  | 1.00 | 0.00 |
| C           |    |     |     |        |        |        |      |      |
| HETATM11624 | H6 | PRP | 810 | 10.801 | 17.168 | 5.971  | 1.00 | 0.00 |
| H           |    |     |     |        |        |        |      |      |
| HETATM11625 | H7 | PRP | 810 | 12.394 | 17.113 | 5.118  | 1.00 | 0.00 |
| H           |    |     |     |        |        |        |      |      |
| HETATM11626 | H8 | PRP | 810 | 11.986 | 15.870 | 6.366  | 1.00 | 0.00 |
| H           |    |     |     |        |        |        |      |      |
| HETATM11627 | O1 | PRP | 811 | 23.876 | 32.523 | -0.725 | 1.00 | 0.00 |
| O           |    |     |     |        |        |        |      |      |
| HETATM11628 | H1 | PRP | 811 | 24.168 | 33.398 | -0.991 | 1.00 | 0.00 |
| H           |    |     |     |        |        |        |      |      |
| HETATM11629 | C1 | PRP | 811 | 22.772 | 32.605 | 0.097  | 1.00 | 0.00 |
| C           |    |     |     |        |        |        |      |      |
| HETATM11630 | H2 | PRP | 811 | 22.236 | 31.695 | 0.366  | 1.00 | 0.00 |
| H           |    |     |     |        |        |        |      |      |
| HETATM11631 | H3 | PRP | 811 | 23.158 | 33.145 | 0.962  | 1.00 | 0.00 |
| H           |    |     |     |        |        |        |      |      |
| HETATM11632 | C2 | PRP | 811 | 21.877 | 33.721 | -0.451 | 1.00 | 0.00 |
| C           |    |     |     |        |        |        |      |      |
| HETATM11633 | H4 | PRP | 811 | 21.579 | 33.522 | -1.480 | 1.00 | 0.00 |
| H           |    |     |     |        |        |        |      |      |
| HETATM11634 | O2 | PRP | 811 | 22.655 | 34.896 | -0.517 | 1.00 | 0.00 |
| O           |    |     |     |        |        |        |      |      |
| HETATM11635 | H5 | PRP | 811 | 22.253 | 35.447 | -1.192 | 1.00 | 0.00 |
| H           |    |     |     |        |        |        |      |      |
| HETATM11636 | C3 | PRP | 811 | 20.776 | 33.932 | 0.617  | 1.00 | 0.00 |
| C           |    |     |     |        |        |        |      |      |
| HETATM11637 | H6 | PRP | 811 | 19.758 | 34.034 | 0.243  | 1.00 | 0.00 |
| H           |    |     |     |        |        |        |      |      |
| HETATM11638 | H7 | PRP | 811 | 20.767 | 33.084 | 1.303  | 1.00 | 0.00 |
| H           |    |     |     |        |        |        |      |      |
| HETATM11639 | H8 | PRP | 811 | 21.023 | 34.802 | 1.226  | 1.00 | 0.00 |
| H           |    |     |     |        |        |        |      |      |
| HETATM11640 | O1 | PRP | 812 | 19.638 | 19.058 | 11.067 | 1.00 | 0.00 |
| O           |    |     |     |        |        |        |      |      |
| HETATM11641 | H1 | PRP | 812 | 18.827 | 18.705 | 11.438 | 1.00 | 0.00 |
| H           |    |     |     |        |        |        |      |      |
| HETATM11642 | C1 | PRP | 812 | 20.578 | 19.241 | 12.012 | 1.00 | 0.00 |
| C           |    |     |     |        |        |        |      |      |
| HETATM11643 | H2 | PRP | 812 | 20.796 | 20.307 | 12.078 | 1.00 | 0.00 |
| H           |    |     |     |        |        |        |      |      |
| HETATM11644 | H3 | PRP | 812 | 20.354 | 18.830 | 12.996 | 1.00 | 0.00 |
| H           |    |     |     |        |        |        |      |      |
| HETATM11645 | C2 | PRP | 812 | 21.793 | 18.465 | 11.542 | 1.00 | 0.00 |
| C           |    |     |     |        |        |        |      |      |
| HETATM11646 | H4 | PRP | 812 | 22.038 | 18.698 | 10.505 | 1.00 | 0.00 |
| H           |    |     |     |        |        |        |      |      |
| HETATM11647 | O2 | PRP | 812 | 21.465 | 17.136 | 11.477 | 1.00 | 0.00 |
| O           |    |     |     |        |        |        |      |      |

|             |    |     |     |        |        |        |      |      |
|-------------|----|-----|-----|--------|--------|--------|------|------|
| HETATM11648 | H5 | PRP | 812 | 20.530 | 17.221 | 11.276 | 1.00 | 0.00 |
| H           |    |     |     |        |        |        |      |      |
| HETATM11649 | C3 | PRP | 812 | 23.053 | 18.660 | 12.341 | 1.00 | 0.00 |
| C           |    |     |     |        |        |        |      |      |
| HETATM11650 | H6 | PRP | 812 | 22.973 | 17.959 | 13.172 | 1.00 | 0.00 |
| H           |    |     |     |        |        |        |      |      |
| HETATM11651 | H7 | PRP | 812 | 23.863 | 18.296 | 11.709 | 1.00 | 0.00 |
| H           |    |     |     |        |        |        |      |      |
| HETATM11652 | H8 | PRP | 812 | 23.093 | 19.700 | 12.664 | 1.00 | 0.00 |
| H           |    |     |     |        |        |        |      |      |
| HETATM11653 | O1 | PRP | 813 | 25.400 | 20.025 | 5.769  | 1.00 | 0.00 |
| O           |    |     |     |        |        |        |      |      |
| HETATM11654 | H1 | PRP | 813 | 25.541 | 19.279 | 6.356  | 1.00 | 0.00 |
| H           |    |     |     |        |        |        |      |      |
| HETATM11655 | C1 | PRP | 813 | 23.984 | 20.490 | 5.716  | 1.00 | 0.00 |
| C           |    |     |     |        |        |        |      |      |
| HETATM11656 | H2 | PRP | 813 | 23.514 | 19.922 | 6.519  | 1.00 | 0.00 |
| H           |    |     |     |        |        |        |      |      |
| HETATM11657 | H3 | PRP | 813 | 24.011 | 21.575 | 5.823  | 1.00 | 0.00 |
| H           |    |     |     |        |        |        |      |      |
| HETATM11658 | C2 | PRP | 813 | 23.280 | 20.024 | 4.407  | 1.00 | 0.00 |
| C           |    |     |     |        |        |        |      |      |
| HETATM11659 | H4 | PRP | 813 | 23.695 | 19.046 | 4.164  | 1.00 | 0.00 |
| H           |    |     |     |        |        |        |      |      |
| HETATM11660 | O2 | PRP | 813 | 23.440 | 20.912 | 3.337  | 1.00 | 0.00 |
| O           |    |     |     |        |        |        |      |      |
| HETATM11661 | H5 | PRP | 813 | 24.372 | 21.132 | 3.282  | 1.00 | 0.00 |
| H           |    |     |     |        |        |        |      |      |
| HETATM11662 | C3 | PRP | 813 | 21.756 | 19.871 | 4.459  | 1.00 | 0.00 |
| C           |    |     |     |        |        |        |      |      |
| HETATM11663 | H6 | PRP | 813 | 21.427 | 19.496 | 3.490  | 1.00 | 0.00 |
| H           |    |     |     |        |        |        |      |      |
| HETATM11664 | H7 | PRP | 813 | 21.495 | 19.098 | 5.181  | 1.00 | 0.00 |
| H           |    |     |     |        |        |        |      |      |
| HETATM11665 | H8 | PRP | 813 | 21.188 | 20.769 | 4.704  | 1.00 | 0.00 |
| H           |    |     |     |        |        |        |      |      |
| HETATM11666 | O1 | PRP | 814 | 14.252 | 10.459 | 13.625 | 1.00 | 0.00 |
| O           |    |     |     |        |        |        |      |      |
| HETATM11667 | H1 | PRP | 814 | 14.532 | 10.947 | 14.403 | 1.00 | 0.00 |
| H           |    |     |     |        |        |        |      |      |
| HETATM11668 | C1 | PRP | 814 | 12.904 | 10.015 | 13.810 | 1.00 | 0.00 |
| C           |    |     |     |        |        |        |      |      |
| HETATM11669 | H2 | PRP | 814 | 12.912 | 9.233  | 14.568 | 1.00 | 0.00 |
| H           |    |     |     |        |        |        |      |      |
| HETATM11670 | H3 | PRP | 814 | 12.241 | 10.842 | 14.065 | 1.00 | 0.00 |
| H           |    |     |     |        |        |        |      |      |
| HETATM11671 | C2 | PRP | 814 | 12.423 | 9.243  | 12.515 | 1.00 | 0.00 |
| C           |    |     |     |        |        |        |      |      |
| HETATM11672 | H4 | PRP | 814 | 11.434 | 8.807  | 12.654 | 1.00 | 0.00 |
| H           |    |     |     |        |        |        |      |      |
| HETATM11673 | O2 | PRP | 814 | 13.388 | 8.308  | 12.060 | 1.00 | 0.00 |
| O           |    |     |     |        |        |        |      |      |
| HETATM11674 | H5 | PRP | 814 | 14.258 | 8.679  | 12.228 | 1.00 | 0.00 |
| H           |    |     |     |        |        |        |      |      |
| HETATM11675 | C3 | PRP | 814 | 12.112 | 10.285 | 11.433 | 1.00 | 0.00 |
| C           |    |     |     |        |        |        |      |      |

|             |    |     |     |        |        |        |      |      |
|-------------|----|-----|-----|--------|--------|--------|------|------|
| HETATM11676 | H6 | PRP | 814 | 12.954 | 10.977 | 11.466 | 1.00 | 0.00 |
| H           |    |     |     |        |        |        |      |      |
| HETATM11677 | H7 | PRP | 814 | 11.982 | 9.791  | 10.470 | 1.00 | 0.00 |
| H           |    |     |     |        |        |        |      |      |
| HETATM11678 | H8 | PRP | 814 | 11.205 | 10.854 | 11.636 | 1.00 | 0.00 |
| H           |    |     |     |        |        |        |      |      |
| HETATM11679 | O1 | PRP | 815 | 4.844  | 15.716 | 5.850  | 1.00 | 0.00 |
| O           |    |     |     |        |        |        |      |      |
| HETATM11680 | H1 | PRP | 815 | 4.636  | 15.726 | 6.787  | 1.00 | 0.00 |
| H           |    |     |     |        |        |        |      |      |
| HETATM11681 | C1 | PRP | 815 | 4.527  | 14.543 | 5.237  | 1.00 | 0.00 |
| C           |    |     |     |        |        |        |      |      |
| HETATM11682 | H2 | PRP | 815 | 4.496  | 13.709 | 5.939  | 1.00 | 0.00 |
| H           |    |     |     |        |        |        |      |      |
| HETATM11683 | H3 | PRP | 815 | 3.614  | 14.666 | 4.654  | 1.00 | 0.00 |
| H           |    |     |     |        |        |        |      |      |
| HETATM11684 | C2 | PRP | 815 | 5.578  | 14.287 | 4.093  | 1.00 | 0.00 |
| C           |    |     |     |        |        |        |      |      |
| HETATM11685 | H4 | PRP | 815 | 6.591  | 14.514 | 4.423  | 1.00 | 0.00 |
| H           |    |     |     |        |        |        |      |      |
| HETATM11686 | O2 | PRP | 815 | 5.234  | 14.966 | 2.955  | 1.00 | 0.00 |
| O           |    |     |     |        |        |        |      |      |
| HETATM11687 | H5 | PRP | 815 | 4.931  | 15.842 | 3.202  | 1.00 | 0.00 |
| H           |    |     |     |        |        |        |      |      |
| HETATM11688 | C3 | PRP | 815 | 5.615  | 12.921 | 3.646  | 1.00 | 0.00 |
| C           |    |     |     |        |        |        |      |      |
| HETATM11689 | H6 | PRP | 815 | 6.528  | 12.719 | 3.087  | 1.00 | 0.00 |
| H           |    |     |     |        |        |        |      |      |
| HETATM11690 | H7 | PRP | 815 | 5.664  | 12.234 | 4.491  | 1.00 | 0.00 |
| H           |    |     |     |        |        |        |      |      |
| HETATM11691 | H8 | PRP | 815 | 4.792  | 12.639 | 2.990  | 1.00 | 0.00 |
| H           |    |     |     |        |        |        |      |      |
| HETATM11692 | O1 | PRP | 816 | 1.220  | 12.409 | 1.479  | 1.00 | 0.00 |
| O           |    |     |     |        |        |        |      |      |
| HETATM11693 | H1 | PRP | 816 | 1.798  | 12.614 | 0.740  | 1.00 | 0.00 |
| H           |    |     |     |        |        |        |      |      |
| HETATM11694 | C1 | PRP | 816 | 1.284  | 13.575 | 2.357  | 1.00 | 0.00 |
| C           |    |     |     |        |        |        |      |      |
| HETATM11695 | H2 | PRP | 816 | 2.301  | 13.922 | 2.541  | 1.00 | 0.00 |
| H           |    |     |     |        |        |        |      |      |
| HETATM11696 | H3 | PRP | 816 | 0.676  | 14.306 | 1.822  | 1.00 | 0.00 |
| H           |    |     |     |        |        |        |      |      |
| HETATM11697 | C2 | PRP | 816 | 0.628  | 13.370 | 3.706  | 1.00 | 0.00 |
| C           |    |     |     |        |        |        |      |      |
| HETATM11698 | H4 | PRP | 816 | 1.290  | 12.816 | 4.372  | 1.00 | 0.00 |
| H           |    |     |     |        |        |        |      |      |
| HETATM11699 | O2 | PRP | 816 | -0.530 | 12.587 | 3.446  | 1.00 | 0.00 |
| O           |    |     |     |        |        |        |      |      |
| HETATM11700 | H5 | PRP | 816 | -0.256 | 11.897 | 2.837  | 1.00 | 0.00 |
| H           |    |     |     |        |        |        |      |      |
| HETATM11701 | C3 | PRP | 816 | 0.213  | 14.637 | 4.516  | 1.00 | 0.00 |
| C           |    |     |     |        |        |        |      |      |
| HETATM11702 | H6 | PRP | 816 | -0.424 | 15.170 | 3.810  | 1.00 | 0.00 |
| H           |    |     |     |        |        |        |      |      |
| HETATM11703 | H7 | PRP | 816 | -0.235 | 14.351 | 5.467  | 1.00 | 0.00 |
| H           |    |     |     |        |        |        |      |      |

|             |    |     |     |        |        |        |      |      |
|-------------|----|-----|-----|--------|--------|--------|------|------|
| HETATM11704 | H8 | PRP | 816 | 1.094  | 15.249 | 4.709  | 1.00 | 0.00 |
| H           |    |     |     |        |        |        |      |      |
| HETATM11705 | O1 | PRP | 817 | 32.480 | 15.686 | 15.323 | 1.00 | 0.00 |
| O           |    |     |     |        |        |        |      |      |
| HETATM11706 | H1 | PRP | 817 | 32.961 | 16.424 | 14.941 | 1.00 | 0.00 |
| H           |    |     |     |        |        |        |      |      |
| HETATM11707 | C1 | PRP | 817 | 31.789 | 16.272 | 16.412 | 1.00 | 0.00 |
| C           |    |     |     |        |        |        |      |      |
| HETATM11708 | H2 | PRP | 817 | 31.733 | 15.650 | 17.305 | 1.00 | 0.00 |
| H           |    |     |     |        |        |        |      |      |
| HETATM11709 | H3 | PRP | 817 | 32.288 | 17.153 | 16.815 | 1.00 | 0.00 |
| H           |    |     |     |        |        |        |      |      |
| HETATM11710 | C2 | PRP | 817 | 30.347 | 16.685 | 16.026 | 1.00 | 0.00 |
| C           |    |     |     |        |        |        |      |      |
| HETATM11711 | H4 | PRP | 817 | 29.882 | 16.017 | 15.301 | 1.00 | 0.00 |
| H           |    |     |     |        |        |        |      |      |
| HETATM11712 | O2 | PRP | 817 | 30.492 | 17.953 | 15.537 | 1.00 | 0.00 |
| O           |    |     |     |        |        |        |      |      |
| HETATM11713 | H5 | PRP | 817 | 30.680 | 17.874 | 14.598 | 1.00 | 0.00 |
| H           |    |     |     |        |        |        |      |      |
| HETATM11714 | C3 | PRP | 817 | 29.462 | 16.737 | 17.297 | 1.00 | 0.00 |
| C           |    |     |     |        |        |        |      |      |
| HETATM11715 | H6 | PRP | 817 | 29.257 | 15.857 | 17.907 | 1.00 | 0.00 |
| H           |    |     |     |        |        |        |      |      |
| HETATM11716 | H7 | PRP | 817 | 29.839 | 17.548 | 17.920 | 1.00 | 0.00 |
| H           |    |     |     |        |        |        |      |      |
| HETATM11717 | H8 | PRP | 817 | 28.494 | 17.154 | 17.021 | 1.00 | 0.00 |
| H           |    |     |     |        |        |        |      |      |
| HETATM11718 | O1 | PRP | 818 | 25.029 | 13.871 | 6.706  | 1.00 | 0.00 |
| O           |    |     |     |        |        |        |      |      |
| HETATM11719 | H1 | PRP | 818 | 25.433 | 14.445 | 7.361  | 1.00 | 0.00 |
| H           |    |     |     |        |        |        |      |      |
| HETATM11720 | C1 | PRP | 818 | 25.403 | 12.524 | 6.996  | 1.00 | 0.00 |
| C           |    |     |     |        |        |        |      |      |
| HETATM11721 | H2 | PRP | 818 | 25.041 | 11.846 | 6.223  | 1.00 | 0.00 |
| H           |    |     |     |        |        |        |      |      |
| HETATM11722 | H3 | PRP | 818 | 26.491 | 12.512 | 6.944  | 1.00 | 0.00 |
| H           |    |     |     |        |        |        |      |      |
| HETATM11723 | C2 | PRP | 818 | 24.841 | 12.224 | 8.417  | 1.00 | 0.00 |
| C           |    |     |     |        |        |        |      |      |
| HETATM11724 | H4 | PRP | 818 | 23.854 | 12.637 | 8.625  | 1.00 | 0.00 |
| H           |    |     |     |        |        |        |      |      |
| HETATM11725 | O2 | PRP | 818 | 25.779 | 12.859 | 9.246  | 1.00 | 0.00 |
| O           |    |     |     |        |        |        |      |      |
| HETATM11726 | H5 | PRP | 818 | 26.547 | 12.284 | 9.221  | 1.00 | 0.00 |
| H           |    |     |     |        |        |        |      |      |
| HETATM11727 | C3 | PRP | 818 | 24.671 | 10.701 | 8.590  | 1.00 | 0.00 |
| C           |    |     |     |        |        |        |      |      |
| HETATM11728 | H6 | PRP | 818 | 24.735 | 10.586 | 9.672  | 1.00 | 0.00 |
| H           |    |     |     |        |        |        |      |      |
| HETATM11729 | H7 | PRP | 818 | 23.773 | 10.275 | 8.142  | 1.00 | 0.00 |
| H           |    |     |     |        |        |        |      |      |
| HETATM11730 | H8 | PRP | 818 | 25.529 | 10.197 | 8.144  | 1.00 | 0.00 |
| H           |    |     |     |        |        |        |      |      |
| HETATM11731 | O1 | PRP | 819 | -7.312 | 10.684 | 9.411  | 1.00 | 0.00 |
| O           |    |     |     |        |        |        |      |      |

|             |    |     |     |        |        |        |      |      |
|-------------|----|-----|-----|--------|--------|--------|------|------|
| HETATM11732 | H1 | PRP | 819 | -7.477 | 10.140 | 10.185 | 1.00 | 0.00 |
| H           |    |     |     |        |        |        |      |      |
| HETATM11733 | C1 | PRP | 819 | -6.037 | 10.341 | 8.924  | 1.00 | 0.00 |
| C           |    |     |     |        |        |        |      |      |
| HETATM11734 | H2 | PRP | 819 | -5.807 | 10.694 | 7.919  | 1.00 | 0.00 |
| H           |    |     |     |        |        |        |      |      |
| HETATM11735 | H3 | PRP | 819 | -5.318 | 10.765 | 9.625  | 1.00 | 0.00 |
| H           |    |     |     |        |        |        |      |      |
| HETATM11736 | C2 | PRP | 819 | -5.871 | 8.837  | 8.951  | 1.00 | 0.00 |
| C           |    |     |     |        |        |        |      |      |
| HETATM11737 | H4 | PRP | 819 | -6.520 | 8.535  | 8.130  | 1.00 | 0.00 |
| H           |    |     |     |        |        |        |      |      |
| HETATM11738 | O2 | PRP | 819 | -6.255 | 8.263  | 10.147 | 1.00 | 0.00 |
| O           |    |     |     |        |        |        |      |      |
| HETATM11739 | H5 | PRP | 819 | -5.762 | 8.748  | 10.812 | 1.00 | 0.00 |
| H           |    |     |     |        |        |        |      |      |
| HETATM11740 | C3 | PRP | 819 | -4.428 | 8.422  | 8.592  | 1.00 | 0.00 |
| C           |    |     |     |        |        |        |      |      |
| HETATM11741 | H6 | PRP | 819 | -3.679 | 8.831  | 9.271  | 1.00 | 0.00 |
| H           |    |     |     |        |        |        |      |      |
| HETATM11742 | H7 | PRP | 819 | -4.258 | 7.347  | 8.660  | 1.00 | 0.00 |
| H           |    |     |     |        |        |        |      |      |
| HETATM11743 | H8 | PRP | 819 | -4.174 | 8.709  | 7.572  | 1.00 | 0.00 |
| H           |    |     |     |        |        |        |      |      |
| HETATM11744 | O1 | PRP | 820 | 30.813 | 17.428 | 11.798 | 1.00 | 0.00 |
| O           |    |     |     |        |        |        |      |      |
| HETATM11745 | H1 | PRP | 820 | 30.600 | 16.990 | 10.971 | 1.00 | 0.00 |
| H           |    |     |     |        |        |        |      |      |
| HETATM11746 | C1 | PRP | 820 | 31.740 | 18.419 | 11.578 | 1.00 | 0.00 |
| C           |    |     |     |        |        |        |      |      |
| HETATM11747 | H2 | PRP | 820 | 32.174 | 18.752 | 12.522 | 1.00 | 0.00 |
| H           |    |     |     |        |        |        |      |      |
| HETATM11748 | H3 | PRP | 820 | 32.561 | 18.003 | 10.996 | 1.00 | 0.00 |
| H           |    |     |     |        |        |        |      |      |
| HETATM11749 | C2 | PRP | 820 | 31.241 | 19.647 | 10.803 | 1.00 | 0.00 |
| C           |    |     |     |        |        |        |      |      |
| HETATM11750 | H4 | PRP | 820 | 30.245 | 19.883 | 11.177 | 1.00 | 0.00 |
| H           |    |     |     |        |        |        |      |      |
| HETATM11751 | O2 | PRP | 820 | 31.261 | 19.443 | 9.400  | 1.00 | 0.00 |
| O           |    |     |     |        |        |        |      |      |
| HETATM11752 | H5 | PRP | 820 | 30.891 | 20.217 | 8.971  | 1.00 | 0.00 |
| H           |    |     |     |        |        |        |      |      |
| HETATM11753 | C3 | PRP | 820 | 31.992 | 20.857 | 11.156 | 1.00 | 0.00 |
| C           |    |     |     |        |        |        |      |      |
| HETATM11754 | H6 | PRP | 820 | 33.073 | 20.754 | 11.053 | 1.00 | 0.00 |
| H           |    |     |     |        |        |        |      |      |
| HETATM11755 | H7 | PRP | 820 | 31.648 | 21.712 | 10.574 | 1.00 | 0.00 |
| H           |    |     |     |        |        |        |      |      |
| HETATM11756 | H8 | PRP | 820 | 31.857 | 21.279 | 12.151 | 1.00 | 0.00 |
| H           |    |     |     |        |        |        |      |      |
| HETATM11757 | O1 | PRP | 821 | 26.027 | 22.152 | 2.415  | 1.00 | 0.00 |
| O           |    |     |     |        |        |        |      |      |
| HETATM11758 | H1 | PRP | 821 | 26.263 | 23.058 | 2.624  | 1.00 | 0.00 |
| H           |    |     |     |        |        |        |      |      |
| HETATM11759 | C1 | PRP | 821 | 27.277 | 21.570 | 2.029  | 1.00 | 0.00 |
| C           |    |     |     |        |        |        |      |      |

|             |    |     |     |        |        |        |      |      |
|-------------|----|-----|-----|--------|--------|--------|------|------|
| HETATM11760 | H2 | PRP | 821 | 27.231 | 21.351 | 0.963  | 1.00 | 0.00 |
| H           |    |     |     |        |        |        |      |      |
| HETATM11761 | H3 | PRP | 821 | 28.053 | 22.332 | 2.102  | 1.00 | 0.00 |
| H           |    |     |     |        |        |        |      |      |
| HETATM11762 | C2 | PRP | 821 | 27.698 | 20.349 | 2.850  | 1.00 | 0.00 |
| C           |    |     |     |        |        |        |      |      |
| HETATM11763 | H4 | PRP | 821 | 26.971 | 19.579 | 2.595  | 1.00 | 0.00 |
| H           |    |     |     |        |        |        |      |      |
| HETATM11764 | O2 | PRP | 821 | 27.608 | 20.609 | 4.250  | 1.00 | 0.00 |
| O           |    |     |     |        |        |        |      |      |
| HETATM11765 | H5 | PRP | 821 | 26.672 | 20.626 | 4.464  | 1.00 | 0.00 |
| H           |    |     |     |        |        |        |      |      |
| HETATM11766 | C3 | PRP | 821 | 29.163 | 19.884 | 2.623  | 1.00 | 0.00 |
| C           |    |     |     |        |        |        |      |      |
| HETATM11767 | H6 | PRP | 821 | 29.442 | 19.102 | 3.329  | 1.00 | 0.00 |
| H           |    |     |     |        |        |        |      |      |
| HETATM11768 | H7 | PRP | 821 | 29.193 | 19.309 | 1.698  | 1.00 | 0.00 |
| H           |    |     |     |        |        |        |      |      |
| HETATM11769 | H8 | PRP | 821 | 29.878 | 20.706 | 2.577  | 1.00 | 0.00 |
| H           |    |     |     |        |        |        |      |      |
| HETATM11770 | O1 | PRP | 822 | 35.933 | 40.916 | 23.232 | 1.00 | 0.00 |
| O           |    |     |     |        |        |        |      |      |
| HETATM11771 | H1 | PRP | 822 | 36.618 | 40.825 | 22.565 | 1.00 | 0.00 |
| H           |    |     |     |        |        |        |      |      |
| HETATM11772 | C1 | PRP | 822 | 34.725 | 41.234 | 22.626 | 1.00 | 0.00 |
| C           |    |     |     |        |        |        |      |      |
| HETATM11773 | H2 | PRP | 822 | 34.295 | 42.145 | 23.041 | 1.00 | 0.00 |
| H           |    |     |     |        |        |        |      |      |
| HETATM11774 | H3 | PRP | 822 | 34.691 | 41.417 | 21.552 | 1.00 | 0.00 |
| H           |    |     |     |        |        |        |      |      |
| HETATM11775 | C2 | PRP | 822 | 33.726 | 40.113 | 22.955 | 1.00 | 0.00 |
| C           |    |     |     |        |        |        |      |      |
| HETATM11776 | H4 | PRP | 822 | 33.656 | 40.075 | 24.042 | 1.00 | 0.00 |
| H           |    |     |     |        |        |        |      |      |
| HETATM11777 | O2 | PRP | 822 | 33.957 | 38.891 | 22.266 | 1.00 | 0.00 |
| O           |    |     |     |        |        |        |      |      |
| HETATM11778 | H5 | PRP | 822 | 34.886 | 38.713 | 22.428 | 1.00 | 0.00 |
| H           |    |     |     |        |        |        |      |      |
| HETATM11779 | C3 | PRP | 822 | 32.302 | 40.491 | 22.485 | 1.00 | 0.00 |
| C           |    |     |     |        |        |        |      |      |
| HETATM11780 | H6 | PRP | 822 | 31.689 | 39.608 | 22.669 | 1.00 | 0.00 |
| H           |    |     |     |        |        |        |      |      |
| HETATM11781 | H7 | PRP | 822 | 31.988 | 41.314 | 23.127 | 1.00 | 0.00 |
| H           |    |     |     |        |        |        |      |      |
| HETATM11782 | H8 | PRP | 822 | 32.395 | 40.886 | 21.473 | 1.00 | 0.00 |
| H           |    |     |     |        |        |        |      |      |
| HETATM11783 | O1 | PRP | 823 | 41.905 | 39.501 | 9.903  | 1.00 | 0.00 |
| O           |    |     |     |        |        |        |      |      |
| HETATM11784 | H1 | PRP | 823 | 42.747 | 39.100 | 10.129 | 1.00 | 0.00 |
| H           |    |     |     |        |        |        |      |      |
| HETATM11785 | C1 | PRP | 823 | 40.865 | 38.654 | 10.368 | 1.00 | 0.00 |
| C           |    |     |     |        |        |        |      |      |
| HETATM11786 | H2 | PRP | 823 | 40.696 | 37.893 | 9.607  | 1.00 | 0.00 |
| H           |    |     |     |        |        |        |      |      |
| HETATM11787 | H3 | PRP | 823 | 41.176 | 38.139 | 11.277 | 1.00 | 0.00 |
| H           |    |     |     |        |        |        |      |      |



|             |    |     |     |        |        |        |      |      |
|-------------|----|-----|-----|--------|--------|--------|------|------|
| HETATM11788 | C2 | PRP | 823 | 39.522 | 39.418 | 10.602 | 1.00 | 0.00 |
| C           |    |     |     |        |        |        |      |      |
| HETATM11789 | H4 | PRP | 823 | 39.469 | 40.116 | 9.766  | 1.00 | 0.00 |
| H           |    |     |     |        |        |        |      |      |
| HETATM11790 | O2 | PRP | 823 | 39.706 | 40.183 | 11.728 | 1.00 | 0.00 |
| O           |    |     |     |        |        |        |      |      |
| HETATM11791 | H5 | PRP | 823 | 40.283 | 39.704 | 12.327 | 1.00 | 0.00 |
| H           |    |     |     |        |        |        |      |      |
| HETATM11792 | C3 | PRP | 823 | 38.248 | 38.538 | 10.610 | 1.00 | 0.00 |
| C           |    |     |     |        |        |        |      |      |
| HETATM11793 | H6 | PRP | 823 | 37.386 | 39.204 | 10.637 | 1.00 | 0.00 |
| H           |    |     |     |        |        |        |      |      |
| HETATM11794 | H7 | PRP | 823 | 38.234 | 38.092 | 9.616  | 1.00 | 0.00 |
| H           |    |     |     |        |        |        |      |      |
| HETATM11795 | H8 | PRP | 823 | 38.185 | 37.730 | 11.339 | 1.00 | 0.00 |
| H           |    |     |     |        |        |        |      |      |
| HETATM11796 | O1 | PRP | 824 | 39.481 | 41.028 | 17.212 | 1.00 | 0.00 |
| O           |    |     |     |        |        |        |      |      |
| HETATM11797 | H1 | PRP | 824 | 38.967 | 41.801 | 17.459 | 1.00 | 0.00 |
| H           |    |     |     |        |        |        |      |      |
| HETATM11798 | C1 | PRP | 824 | 38.785 | 40.361 | 16.122 | 1.00 | 0.00 |
| C           |    |     |     |        |        |        |      |      |
| HETATM11799 | H2 | PRP | 824 | 39.477 | 39.660 | 15.656 | 1.00 | 0.00 |
| H           |    |     |     |        |        |        |      |      |
| HETATM11800 | H3 | PRP | 824 | 37.941 | 39.764 | 16.466 | 1.00 | 0.00 |
| H           |    |     |     |        |        |        |      |      |
| HETATM11801 | C2 | PRP | 824 | 38.372 | 41.434 | 15.096 | 1.00 | 0.00 |
| C           |    |     |     |        |        |        |      |      |
| HETATM11802 | H4 | PRP | 824 | 39.219 | 41.924 | 14.616 | 1.00 | 0.00 |
| H           |    |     |     |        |        |        |      |      |
| HETATM11803 | O2 | PRP | 824 | 37.479 | 42.292 | 15.777 | 1.00 | 0.00 |
| O           |    |     |     |        |        |        |      |      |
| HETATM11804 | H5 | PRP | 824 | 36.684 | 42.268 | 15.239 | 1.00 | 0.00 |
| H           |    |     |     |        |        |        |      |      |
| HETATM11805 | C3 | PRP | 824 | 37.500 | 40.745 | 14.022 | 1.00 | 0.00 |
| C           |    |     |     |        |        |        |      |      |
| HETATM11806 | H6 | PRP | 824 | 36.690 | 40.227 | 14.535 | 1.00 | 0.00 |
| H           |    |     |     |        |        |        |      |      |
| HETATM11807 | H7 | PRP | 824 | 37.075 | 41.451 | 13.309 | 1.00 | 0.00 |
| H           |    |     |     |        |        |        |      |      |
| HETATM11808 | H8 | PRP | 824 | 38.136 | 39.943 | 13.649 | 1.00 | 0.00 |
| H           |    |     |     |        |        |        |      |      |
| HETATM11809 | O1 | PRP | 825 | 49.672 | 52.514 | 20.185 | 1.00 | 0.00 |
| O           |    |     |     |        |        |        |      |      |
| HETATM11810 | H1 | PRP | 825 | 49.604 | 52.786 | 21.103 | 1.00 | 0.00 |
| H           |    |     |     |        |        |        |      |      |
| HETATM11811 | C1 | PRP | 825 | 48.356 | 52.607 | 19.709 | 1.00 | 0.00 |
| C           |    |     |     |        |        |        |      |      |
| HETATM11812 | H2 | PRP | 825 | 47.635 | 52.522 | 20.522 | 1.00 | 0.00 |
| H           |    |     |     |        |        |        |      |      |
| HETATM11813 | H3 | PRP | 825 | 48.090 | 53.557 | 19.246 | 1.00 | 0.00 |
| H           |    |     |     |        |        |        |      |      |
| HETATM11814 | C2 | PRP | 825 | 48.187 | 51.415 | 18.785 | 1.00 | 0.00 |
| C           |    |     |     |        |        |        |      |      |
| HETATM11815 | H4 | PRP | 825 | 48.570 | 50.543 | 19.317 | 1.00 | 0.00 |
| H           |    |     |     |        |        |        |      |      |

|             |    |     |     |        |        |        |      |      |
|-------------|----|-----|-----|--------|--------|--------|------|------|
| HETATM11816 | O2 | PRP | 825 | 48.861 | 51.655 | 17.495 | 1.00 | 0.00 |
| O           |    |     |     |        |        |        |      |      |
| HETATM11817 | H5 | PRP | 825 | 49.416 | 52.432 | 17.599 | 1.00 | 0.00 |
| H           |    |     |     |        |        |        |      |      |
| HETATM11818 | C3 | PRP | 825 | 46.762 | 51.026 | 18.447 | 1.00 | 0.00 |
| C           |    |     |     |        |        |        |      |      |
| HETATM11819 | H6 | PRP | 825 | 46.209 | 50.728 | 19.339 | 1.00 | 0.00 |
| H           |    |     |     |        |        |        |      |      |
| HETATM11820 | H7 | PRP | 825 | 46.290 | 51.984 | 18.231 | 1.00 | 0.00 |
| H           |    |     |     |        |        |        |      |      |
| HETATM11821 | H8 | PRP | 825 | 46.724 | 50.313 | 17.624 | 1.00 | 0.00 |
| H           |    |     |     |        |        |        |      |      |
| HETATM11822 | O1 | PRP | 826 | 44.884 | 31.849 | 18.700 | 1.00 | 0.00 |
| O           |    |     |     |        |        |        |      |      |
| HETATM11823 | H1 | PRP | 826 | 45.338 | 32.507 | 18.168 | 1.00 | 0.00 |
| H           |    |     |     |        |        |        |      |      |
| HETATM11824 | C1 | PRP | 826 | 44.865 | 32.270 | 20.033 | 1.00 | 0.00 |
| C           |    |     |     |        |        |        |      |      |
| HETATM11825 | H2 | PRP | 826 | 44.032 | 31.757 | 20.514 | 1.00 | 0.00 |
| H           |    |     |     |        |        |        |      |      |
| HETATM11826 | H3 | PRP | 826 | 45.857 | 32.183 | 20.477 | 1.00 | 0.00 |
| H           |    |     |     |        |        |        |      |      |
| HETATM11827 | C2 | PRP | 826 | 44.455 | 33.721 | 20.136 | 1.00 | 0.00 |
| C           |    |     |     |        |        |        |      |      |
| HETATM11828 | H4 | PRP | 826 | 43.532 | 33.763 | 19.557 | 1.00 | 0.00 |
| H           |    |     |     |        |        |        |      |      |
| HETATM11829 | O2 | PRP | 826 | 45.398 | 34.584 | 19.488 | 1.00 | 0.00 |
| O           |    |     |     |        |        |        |      |      |
| HETATM11830 | H5 | PRP | 826 | 46.211 | 34.240 | 19.865 | 1.00 | 0.00 |
| H           |    |     |     |        |        |        |      |      |
| HETATM11831 | C3 | PRP | 826 | 44.208 | 34.228 | 21.608 | 1.00 | 0.00 |
| C           |    |     |     |        |        |        |      |      |
| HETATM11832 | H6 | PRP | 826 | 43.370 | 33.621 | 21.952 | 1.00 | 0.00 |
| H           |    |     |     |        |        |        |      |      |
| HETATM11833 | H7 | PRP | 826 | 45.111 | 34.244 | 22.218 | 1.00 | 0.00 |
| H           |    |     |     |        |        |        |      |      |
| HETATM11834 | H8 | PRP | 826 | 43.813 | 35.244 | 21.622 | 1.00 | 0.00 |
| H           |    |     |     |        |        |        |      |      |
| HETATM11835 | O1 | PRP | 827 | 30.762 | 35.952 | 16.618 | 1.00 | 0.00 |
| O           |    |     |     |        |        |        |      |      |
| HETATM11836 | H1 | PRP | 827 | 29.973 | 35.413 | 16.524 | 1.00 | 0.00 |
| H           |    |     |     |        |        |        |      |      |
| HETATM11837 | C1 | PRP | 827 | 31.705 | 35.739 | 15.600 | 1.00 | 0.00 |
| C           |    |     |     |        |        |        |      |      |
| HETATM11838 | H2 | PRP | 827 | 31.404 | 36.119 | 14.623 | 1.00 | 0.00 |
| H           |    |     |     |        |        |        |      |      |
| HETATM11839 | H3 | PRP | 827 | 32.568 | 36.349 | 15.864 | 1.00 | 0.00 |
| H           |    |     |     |        |        |        |      |      |
| HETATM11840 | C2 | PRP | 827 | 32.193 | 34.287 | 15.481 | 1.00 | 0.00 |
| C           |    |     |     |        |        |        |      |      |
| HETATM11841 | H4 | PRP | 827 | 32.969 | 34.245 | 14.717 | 1.00 | 0.00 |
| H           |    |     |     |        |        |        |      |      |
| HETATM11842 | O2 | PRP | 827 | 31.048 | 33.472 | 15.169 | 1.00 | 0.00 |
| O           |    |     |     |        |        |        |      |      |
| HETATM11843 | H5 | PRP | 827 | 30.527 | 33.411 | 15.973 | 1.00 | 0.00 |
| H           |    |     |     |        |        |        |      |      |

|             |    |     |     |        |        |        |      |      |
|-------------|----|-----|-----|--------|--------|--------|------|------|
| HETATM11844 | C3 | PRP | 827 | 32.655 | 33.759 | 16.896 | 1.00 | 0.00 |
| C           |    |     |     |        |        |        |      |      |
| HETATM11845 | H6 | PRP | 827 | 33.021 | 32.739 | 16.783 | 1.00 | 0.00 |
| H           |    |     |     |        |        |        |      |      |
| HETATM11846 | H7 | PRP | 827 | 33.448 | 34.395 | 17.290 | 1.00 | 0.00 |
| H           |    |     |     |        |        |        |      |      |
| HETATM11847 | H8 | PRP | 827 | 31.796 | 33.752 | 17.567 | 1.00 | 0.00 |
| H           |    |     |     |        |        |        |      |      |
| HETATM11848 | O1 | PRP | 828 | 37.467 | 45.566 | 14.378 | 1.00 | 0.00 |
| O           |    |     |     |        |        |        |      |      |
| HETATM11849 | H1 | PRP | 828 | 37.831 | 45.863 | 15.215 | 1.00 | 0.00 |
| H           |    |     |     |        |        |        |      |      |
| HETATM11850 | C1 | PRP | 828 | 38.004 | 46.414 | 13.351 | 1.00 | 0.00 |
| C           |    |     |     |        |        |        |      |      |
| HETATM11851 | H2 | PRP | 828 | 38.113 | 47.422 | 13.751 | 1.00 | 0.00 |
| H           |    |     |     |        |        |        |      |      |
| HETATM11852 | H3 | PRP | 828 | 38.973 | 46.031 | 13.029 | 1.00 | 0.00 |
| H           |    |     |     |        |        |        |      |      |
| HETATM11853 | C2 | PRP | 828 | 37.174 | 46.419 | 12.074 | 1.00 | 0.00 |
| C           |    |     |     |        |        |        |      |      |
| HETATM11854 | H4 | PRP | 828 | 36.199 | 46.879 | 12.237 | 1.00 | 0.00 |
| H           |    |     |     |        |        |        |      |      |
| HETATM11855 | O2 | PRP | 828 | 37.177 | 45.075 | 11.650 | 1.00 | 0.00 |
| O           |    |     |     |        |        |        |      |      |
| HETATM11856 | H5 | PRP | 828 | 37.029 | 44.627 | 12.486 | 1.00 | 0.00 |
| H           |    |     |     |        |        |        |      |      |
| HETATM11857 | C3 | PRP | 828 | 37.861 | 47.265 | 11.029 | 1.00 | 0.00 |
| C           |    |     |     |        |        |        |      |      |
| HETATM11858 | H6 | PRP | 828 | 38.584 | 46.693 | 10.448 | 1.00 | 0.00 |
| H           |    |     |     |        |        |        |      |      |
| HETATM11859 | H7 | PRP | 828 | 37.070 | 47.782 | 10.486 | 1.00 | 0.00 |
| H           |    |     |     |        |        |        |      |      |
| HETATM11860 | H8 | PRP | 828 | 38.297 | 48.133 | 11.524 | 1.00 | 0.00 |
| H           |    |     |     |        |        |        |      |      |
| HETATM11861 | O1 | PRP | 829 | 39.733 | 42.995 | 12.321 | 1.00 | 0.00 |
| O           |    |     |     |        |        |        |      |      |
| HETATM11862 | H1 | PRP | 829 | 40.055 | 42.092 | 12.367 | 1.00 | 0.00 |
| H           |    |     |     |        |        |        |      |      |
| HETATM11863 | C1 | PRP | 829 | 40.416 | 43.738 | 11.338 | 1.00 | 0.00 |
| C           |    |     |     |        |        |        |      |      |
| HETATM11864 | H2 | PRP | 829 | 39.683 | 44.432 | 10.925 | 1.00 | 0.00 |
| H           |    |     |     |        |        |        |      |      |
| HETATM11865 | H3 | PRP | 829 | 41.262 | 44.326 | 11.694 | 1.00 | 0.00 |
| H           |    |     |     |        |        |        |      |      |
| HETATM11866 | C2 | PRP | 829 | 40.940 | 42.852 | 10.228 | 1.00 | 0.00 |
| C           |    |     |     |        |        |        |      |      |
| HETATM11867 | H4 | PRP | 829 | 40.257 | 42.023 | 10.043 | 1.00 | 0.00 |
| H           |    |     |     |        |        |        |      |      |
| HETATM11868 | O2 | PRP | 829 | 42.163 | 42.255 | 10.652 | 1.00 | 0.00 |
| O           |    |     |     |        |        |        |      |      |
| HETATM11869 | H5 | PRP | 829 | 42.224 | 41.373 | 10.278 | 1.00 | 0.00 |
| H           |    |     |     |        |        |        |      |      |
| HETATM11870 | C3 | PRP | 829 | 41.017 | 43.587 | 8.883  | 1.00 | 0.00 |
| C           |    |     |     |        |        |        |      |      |
| HETATM11871 | H6 | PRP | 829 | 40.014 | 43.955 | 8.669  | 1.00 | 0.00 |
| H           |    |     |     |        |        |        |      |      |

|             |    |     |     |        |        |        |      |      |
|-------------|----|-----|-----|--------|--------|--------|------|------|
| HETATM11872 | H7 | PRP | 829 | 41.711 | 44.424 | 8.966  | 1.00 | 0.00 |
| H           |    |     |     |        |        |        |      |      |
| HETATM11873 | H8 | PRP | 829 | 41.196 | 42.853 | 8.097  | 1.00 | 0.00 |
| H           |    |     |     |        |        |        |      |      |
| HETATM11874 | O1 | PRP | 830 | 42.898 | 41.973 | 20.694 | 1.00 | 0.00 |
| O           |    |     |     |        |        |        |      |      |
| HETATM11875 | H1 | PRP | 830 | 43.207 | 41.390 | 21.392 | 1.00 | 0.00 |
| H           |    |     |     |        |        |        |      |      |
| HETATM11876 | C1 | PRP | 830 | 43.320 | 41.369 | 19.520 | 1.00 | 0.00 |
| C           |    |     |     |        |        |        |      |      |
| HETATM11877 | H2 | PRP | 830 | 44.407 | 41.424 | 19.588 | 1.00 | 0.00 |
| H           |    |     |     |        |        |        |      |      |
| HETATM11878 | H3 | PRP | 830 | 42.861 | 40.381 | 19.495 | 1.00 | 0.00 |
| H           |    |     |     |        |        |        |      |      |
| HETATM11879 | C2 | PRP | 830 | 42.831 | 42.225 | 18.360 | 1.00 | 0.00 |
| C           |    |     |     |        |        |        |      |      |
| HETATM11880 | H4 | PRP | 830 | 42.070 | 42.942 | 18.670 | 1.00 | 0.00 |
| H           |    |     |     |        |        |        |      |      |
| HETATM11881 | O2 | PRP | 830 | 42.200 | 41.435 | 17.317 | 1.00 | 0.00 |
| O           |    |     |     |        |        |        |      |      |
| HETATM11882 | H5 | PRP | 830 | 41.326 | 41.132 | 17.576 | 1.00 | 0.00 |
| H           |    |     |     |        |        |        |      |      |
| HETATM11883 | C3 | PRP | 830 | 43.973 | 43.103 | 17.840 | 1.00 | 0.00 |
| C           |    |     |     |        |        |        |      |      |
| HETATM11884 | H6 | PRP | 830 | 44.379 | 43.758 | 18.610 | 1.00 | 0.00 |
| H           |    |     |     |        |        |        |      |      |
| HETATM11885 | H7 | PRP | 830 | 44.767 | 42.418 | 17.541 | 1.00 | 0.00 |
| H           |    |     |     |        |        |        |      |      |
| HETATM11886 | H8 | PRP | 830 | 43.535 | 43.782 | 17.108 | 1.00 | 0.00 |
| H           |    |     |     |        |        |        |      |      |
| HETATM11887 | O1 | PRP | 831 | 35.442 | 19.049 | -1.019 | 1.00 | 0.00 |
| O           |    |     |     |        |        |        |      |      |
| HETATM11888 | H1 | PRP | 831 | 34.957 | 18.674 | -1.758 | 1.00 | 0.00 |
| H           |    |     |     |        |        |        |      |      |
| HETATM11889 | C1 | PRP | 831 | 34.687 | 18.722 | 0.143  | 1.00 | 0.00 |
| C           |    |     |     |        |        |        |      |      |
| HETATM11890 | H2 | PRP | 831 | 34.295 | 17.708 | 0.222  | 1.00 | 0.00 |
| H           |    |     |     |        |        |        |      |      |
| HETATM11891 | H3 | PRP | 831 | 35.524 | 18.909 | 0.816  | 1.00 | 0.00 |
| H           |    |     |     |        |        |        |      |      |
| HETATM11892 | C2 | PRP | 831 | 33.547 | 19.804 | 0.463  | 1.00 | 0.00 |
| C           |    |     |     |        |        |        |      |      |
| HETATM11893 | H4 | PRP | 831 | 34.036 | 20.766 | 0.615  | 1.00 | 0.00 |
| H           |    |     |     |        |        |        |      |      |
| HETATM11894 | O2 | PRP | 831 | 32.750 | 19.489 | 1.591  | 1.00 | 0.00 |
| O           |    |     |     |        |        |        |      |      |
| HETATM11895 | H5 | PRP | 831 | 32.496 | 18.565 | 1.535  | 1.00 | 0.00 |
| H           |    |     |     |        |        |        |      |      |
| HETATM11896 | C3 | PRP | 831 | 32.643 | 19.855 | -0.772 | 1.00 | 0.00 |
| C           |    |     |     |        |        |        |      |      |
| HETATM11897 | H6 | PRP | 831 | 32.182 | 18.868 | -0.774 | 1.00 | 0.00 |
| H           |    |     |     |        |        |        |      |      |
| HETATM11898 | H7 | PRP | 831 | 31.818 | 20.542 | -0.585 | 1.00 | 0.00 |
| H           |    |     |     |        |        |        |      |      |
| HETATM11899 | H8 | PRP | 831 | 33.193 | 20.085 | -1.685 | 1.00 | 0.00 |
| H           |    |     |     |        |        |        |      |      |

|             |    |     |     |        |        |        |      |      |
|-------------|----|-----|-----|--------|--------|--------|------|------|
| HETATM11900 | O1 | PRP | 832 | 39.363 | 35.955 | 15.278 | 1.00 | 0.00 |
| O           |    |     |     |        |        |        |      |      |
| HETATM11901 | H1 | PRP | 832 | 39.339 | 35.298 | 14.579 | 1.00 | 0.00 |
| H           |    |     |     |        |        |        |      |      |
| HETATM11902 | C1 | PRP | 832 | 38.047 | 36.437 | 15.285 | 1.00 | 0.00 |
| C           |    |     |     |        |        |        |      |      |
| HETATM11903 | H2 | PRP | 832 | 37.978 | 37.474 | 15.613 | 1.00 | 0.00 |
| H           |    |     |     |        |        |        |      |      |
| HETATM11904 | H3 | PRP | 832 | 37.589 | 36.440 | 14.296 | 1.00 | 0.00 |
| H           |    |     |     |        |        |        |      |      |
| HETATM11905 | C2 | PRP | 832 | 37.302 | 35.513 | 16.215 | 1.00 | 0.00 |
| C           |    |     |     |        |        |        |      |      |
| HETATM11906 | H4 | PRP | 832 | 37.881 | 35.482 | 17.138 | 1.00 | 0.00 |
| H           |    |     |     |        |        |        |      |      |
| HETATM11907 | O2 | PRP | 832 | 37.085 | 34.291 | 15.540 | 1.00 | 0.00 |
| O           |    |     |     |        |        |        |      |      |
| HETATM11908 | H5 | PRP | 832 | 37.880 | 33.770 | 15.674 | 1.00 | 0.00 |
| H           |    |     |     |        |        |        |      |      |
| HETATM11909 | C3 | PRP | 832 | 35.913 | 36.016 | 16.559 | 1.00 | 0.00 |
| C           |    |     |     |        |        |        |      |      |
| HETATM11910 | H6 | PRP | 832 | 35.143 | 35.663 | 15.873 | 1.00 | 0.00 |
| H           |    |     |     |        |        |        |      |      |
| HETATM11911 | H7 | PRP | 832 | 35.656 | 35.676 | 17.563 | 1.00 | 0.00 |
| H           |    |     |     |        |        |        |      |      |
| HETATM11912 | H8 | PRP | 832 | 36.038 | 37.094 | 16.660 | 1.00 | 0.00 |
| H           |    |     |     |        |        |        |      |      |
| HETATM11913 | O1 | PRP | 833 | 29.380 | 28.439 | 2.915  | 1.00 | 0.00 |
| O           |    |     |     |        |        |        |      |      |
| HETATM11914 | H1 | PRP | 833 | 28.568 | 28.407 | 3.426  | 1.00 | 0.00 |
| H           |    |     |     |        |        |        |      |      |
| HETATM11915 | C1 | PRP | 833 | 30.241 | 29.292 | 3.601  | 1.00 | 0.00 |
| C           |    |     |     |        |        |        |      |      |
| HETATM11916 | H2 | PRP | 833 | 29.837 | 30.276 | 3.839  | 1.00 | 0.00 |
| H           |    |     |     |        |        |        |      |      |
| HETATM11917 | H3 | PRP | 833 | 30.710 | 28.822 | 4.465  | 1.00 | 0.00 |
| H           |    |     |     |        |        |        |      |      |
| HETATM11918 | C2 | PRP | 833 | 31.409 | 29.611 | 2.675  | 1.00 | 0.00 |
| C           |    |     |     |        |        |        |      |      |
| HETATM11919 | H4 | PRP | 833 | 30.846 | 29.955 | 1.807  | 1.00 | 0.00 |
| H           |    |     |     |        |        |        |      |      |
| HETATM11920 | O2 | PRP | 833 | 32.187 | 28.478 | 2.331  | 1.00 | 0.00 |
| O           |    |     |     |        |        |        |      |      |
| HETATM11921 | H5 | PRP | 833 | 31.656 | 27.707 | 2.117  | 1.00 | 0.00 |
| H           |    |     |     |        |        |        |      |      |
| HETATM11922 | C3 | PRP | 833 | 32.242 | 30.794 | 3.239  | 1.00 | 0.00 |
| C           |    |     |     |        |        |        |      |      |
| HETATM11923 | H6 | PRP | 833 | 32.544 | 30.589 | 4.266  | 1.00 | 0.00 |
| H           |    |     |     |        |        |        |      |      |
| HETATM11924 | H7 | PRP | 833 | 33.166 | 30.881 | 2.668  | 1.00 | 0.00 |
| H           |    |     |     |        |        |        |      |      |
| HETATM11925 | H8 | PRP | 833 | 31.724 | 31.753 | 3.226  | 1.00 | 0.00 |
| H           |    |     |     |        |        |        |      |      |
| HETATM11926 | O1 | PRP | 834 | 47.545 | 32.061 | 14.417 | 1.00 | 0.00 |
| O           |    |     |     |        |        |        |      |      |
| HETATM11927 | H1 | PRP | 834 | 47.539 | 31.877 | 13.475 | 1.00 | 0.00 |
| H           |    |     |     |        |        |        |      |      |

|             |    |     |     |        |        |        |      |      |
|-------------|----|-----|-----|--------|--------|--------|------|------|
| HETATM11928 | C1 | PRP | 834 | 48.768 | 31.634 | 14.980 | 1.00 | 0.00 |
| C           |    |     |     |        |        |        |      |      |
| HETATM11929 | H2 | PRP | 834 | 48.766 | 31.650 | 16.070 | 1.00 | 0.00 |
| H           |    |     |     |        |        |        |      |      |
| HETATM11930 | H3 | PRP | 834 | 49.103 | 30.633 | 14.706 | 1.00 | 0.00 |
| H           |    |     |     |        |        |        |      |      |
| HETATM11931 | C2 | PRP | 834 | 49.732 | 32.631 | 14.438 | 1.00 | 0.00 |
| C           |    |     |     |        |        |        |      |      |
| HETATM11932 | H4 | PRP | 834 | 49.502 | 33.585 | 14.912 | 1.00 | 0.00 |
| H           |    |     |     |        |        |        |      |      |
| HETATM11933 | O2 | PRP | 834 | 49.701 | 32.966 | 13.041 | 1.00 | 0.00 |
| O           |    |     |     |        |        |        |      |      |
| HETATM11934 | H5 | PRP | 834 | 49.550 | 32.192 | 12.493 | 1.00 | 0.00 |
| H           |    |     |     |        |        |        |      |      |
| HETATM11935 | C3 | PRP | 834 | 51.200 | 32.271 | 14.855 | 1.00 | 0.00 |
| C           |    |     |     |        |        |        |      |      |
| HETATM11936 | H6 | PRP | 834 | 51.524 | 31.492 | 14.164 | 1.00 | 0.00 |
| H           |    |     |     |        |        |        |      |      |
| HETATM11937 | H7 | PRP | 834 | 51.863 | 33.106 | 14.630 | 1.00 | 0.00 |
| H           |    |     |     |        |        |        |      |      |
| HETATM11938 | H8 | PRP | 834 | 51.250 | 32.055 | 15.923 | 1.00 | 0.00 |
| H           |    |     |     |        |        |        |      |      |
| HETATM11939 | O1 | PRP | 835 | 50.549 | 35.836 | 30.555 | 1.00 | 0.00 |
| O           |    |     |     |        |        |        |      |      |
| HETATM11940 | H1 | PRP | 835 | 50.800 | 36.107 | 31.442 | 1.00 | 0.00 |
| H           |    |     |     |        |        |        |      |      |
| HETATM11941 | C1 | PRP | 835 | 51.527 | 34.900 | 30.166 | 1.00 | 0.00 |
| C           |    |     |     |        |        |        |      |      |
| HETATM11942 | H2 | PRP | 835 | 51.053 | 33.922 | 30.078 | 1.00 | 0.00 |
| H           |    |     |     |        |        |        |      |      |
| HETATM11943 | H3 | PRP | 835 | 51.822 | 35.229 | 29.170 | 1.00 | 0.00 |
| H           |    |     |     |        |        |        |      |      |
| HETATM11944 | C2 | PRP | 835 | 52.650 | 34.839 | 31.195 | 1.00 | 0.00 |
| C           |    |     |     |        |        |        |      |      |
| HETATM11945 | H4 | PRP | 835 | 52.235 | 34.386 | 32.095 | 1.00 | 0.00 |
| H           |    |     |     |        |        |        |      |      |
| HETATM11946 | O2 | PRP | 835 | 53.225 | 36.114 | 31.412 | 1.00 | 0.00 |
| O           |    |     |     |        |        |        |      |      |
| HETATM11947 | H5 | PRP | 835 | 53.534 | 36.402 | 30.549 | 1.00 | 0.00 |
| H           |    |     |     |        |        |        |      |      |
| HETATM11948 | C3 | PRP | 835 | 53.767 | 33.967 | 30.663 | 1.00 | 0.00 |
| C           |    |     |     |        |        |        |      |      |
| HETATM11949 | H6 | PRP | 835 | 54.213 | 34.218 | 29.700 | 1.00 | 0.00 |
| H           |    |     |     |        |        |        |      |      |
| HETATM11950 | H7 | PRP | 835 | 54.552 | 34.005 | 31.418 | 1.00 | 0.00 |
| H           |    |     |     |        |        |        |      |      |
| HETATM11951 | H8 | PRP | 835 | 53.325 | 32.975 | 30.580 | 1.00 | 0.00 |
| H           |    |     |     |        |        |        |      |      |
| HETATM11952 | O1 | PRP | 836 | 32.606 | 21.776 | 3.109  | 1.00 | 0.00 |
| O           |    |     |     |        |        |        |      |      |
| HETATM11953 | H1 | PRP | 836 | 32.458 | 21.087 | 2.457  | 1.00 | 0.00 |
| H           |    |     |     |        |        |        |      |      |
| HETATM11954 | C1 | PRP | 836 | 33.468 | 21.211 | 4.080  | 1.00 | 0.00 |
| C           |    |     |     |        |        |        |      |      |
| HETATM11955 | H2 | PRP | 836 | 34.289 | 20.714 | 3.564  | 1.00 | 0.00 |
| H           |    |     |     |        |        |        |      |      |

|             |    |     |     |        |        |        |      |      |
|-------------|----|-----|-----|--------|--------|--------|------|------|
| HETATM11956 | H3 | PRP | 836 | 33.892 | 22.026 | 4.667  | 1.00 | 0.00 |
| H           |    |     |     |        |        |        |      |      |
| HETATM11957 | C2 | PRP | 836 | 32.710 | 20.164 | 4.869  | 1.00 | 0.00 |
| C           |    |     |     |        |        |        |      |      |
| HETATM11958 | H4 | PRP | 836 | 32.316 | 19.486 | 4.111  | 1.00 | 0.00 |
| H           |    |     |     |        |        |        |      |      |
| HETATM11959 | O2 | PRP | 836 | 31.682 | 20.754 | 5.593  | 1.00 | 0.00 |
| O           |    |     |     |        |        |        |      |      |
| HETATM11960 | H5 | PRP | 836 | 31.082 | 21.183 | 4.979  | 1.00 | 0.00 |
| H           |    |     |     |        |        |        |      |      |
| HETATM11961 | C3 | PRP | 836 | 33.585 | 19.409 | 5.897  | 1.00 | 0.00 |
| C           |    |     |     |        |        |        |      |      |
| HETATM11962 | H6 | PRP | 836 | 33.086 | 18.593 | 6.420  | 1.00 | 0.00 |
| H           |    |     |     |        |        |        |      |      |
| HETATM11963 | H7 | PRP | 836 | 34.461 | 18.967 | 5.422  | 1.00 | 0.00 |
| H           |    |     |     |        |        |        |      |      |
| HETATM11964 | H8 | PRP | 836 | 33.884 | 20.121 | 6.666  | 1.00 | 0.00 |
| H           |    |     |     |        |        |        |      |      |
| HETATM11965 | O1 | PRP | 837 | 36.232 | 33.359 | 24.833 | 1.00 | 0.00 |
| O           |    |     |     |        |        |        |      |      |
| HETATM11966 | H1 | PRP | 837 | 36.143 | 34.235 | 24.450 | 1.00 | 0.00 |
| H           |    |     |     |        |        |        |      |      |
| HETATM11967 | C1 | PRP | 837 | 37.020 | 32.512 | 23.957 | 1.00 | 0.00 |
| C           |    |     |     |        |        |        |      |      |
| HETATM11968 | H2 | PRP | 837 | 37.047 | 31.470 | 24.274 | 1.00 | 0.00 |
| H           |    |     |     |        |        |        |      |      |
| HETATM11969 | H3 | PRP | 837 | 36.680 | 32.447 | 22.923 | 1.00 | 0.00 |
| H           |    |     |     |        |        |        |      |      |
| HETATM11970 | C2 | PRP | 837 | 38.517 | 32.882 | 23.902 | 1.00 | 0.00 |
| C           |    |     |     |        |        |        |      |      |
| HETATM11971 | H4 | PRP | 837 | 38.872 | 32.863 | 24.932 | 1.00 | 0.00 |
| H           |    |     |     |        |        |        |      |      |
| HETATM11972 | O2 | PRP | 837 | 38.801 | 34.086 | 23.210 | 1.00 | 0.00 |
| O           |    |     |     |        |        |        |      |      |
| HETATM11973 | H5 | PRP | 837 | 38.509 | 34.904 | 23.619 | 1.00 | 0.00 |
| H           |    |     |     |        |        |        |      |      |
| HETATM11974 | C3 | PRP | 837 | 39.271 | 31.832 | 23.155 | 1.00 | 0.00 |
| C           |    |     |     |        |        |        |      |      |
| HETATM11975 | H6 | PRP | 837 | 38.922 | 31.765 | 22.125 | 1.00 | 0.00 |
| H           |    |     |     |        |        |        |      |      |
| HETATM11976 | H7 | PRP | 837 | 40.328 | 32.092 | 23.107 | 1.00 | 0.00 |
| H           |    |     |     |        |        |        |      |      |
| HETATM11977 | H8 | PRP | 837 | 39.225 | 30.880 | 23.684 | 1.00 | 0.00 |
| H           |    |     |     |        |        |        |      |      |
| HETATM11978 | O1 | PRP | 838 | 26.240 | 37.402 | 13.500 | 1.00 | 0.00 |
| O           |    |     |     |        |        |        |      |      |
| HETATM11979 | H1 | PRP | 838 | 26.679 | 37.955 | 12.849 | 1.00 | 0.00 |
| H           |    |     |     |        |        |        |      |      |
| HETATM11980 | C1 | PRP | 838 | 24.971 | 37.735 | 13.855 | 1.00 | 0.00 |
| C           |    |     |     |        |        |        |      |      |
| HETATM11981 | H2 | PRP | 838 | 24.547 | 36.988 | 14.527 | 1.00 | 0.00 |
| H           |    |     |     |        |        |        |      |      |
| HETATM11982 | H3 | PRP | 838 | 24.970 | 38.654 | 14.441 | 1.00 | 0.00 |
| H           |    |     |     |        |        |        |      |      |
| HETATM11983 | C2 | PRP | 838 | 23.936 | 38.000 | 12.746 | 1.00 | 0.00 |
| C           |    |     |     |        |        |        |      |      |

|             |    |     |     |        |        |        |      |      |
|-------------|----|-----|-----|--------|--------|--------|------|------|
| HETATM11984 | H4 | PRP | 838 | 24.483 | 38.539 | 11.972 | 1.00 | 0.00 |
| H           |    |     |     |        |        |        |      |      |
| HETATM11985 | O2 | PRP | 838 | 22.851 | 38.645 | 13.241 | 1.00 | 0.00 |
| O           |    |     |     |        |        |        |      |      |
| HETATM11986 | H5 | PRP | 838 | 22.315 | 38.055 | 13.776 | 1.00 | 0.00 |
| H           |    |     |     |        |        |        |      |      |
| HETATM11987 | C3 | PRP | 838 | 23.425 | 36.774 | 12.178 | 1.00 | 0.00 |
| C           |    |     |     |        |        |        |      |      |
| HETATM11988 | H6 | PRP | 838 | 22.699 | 36.989 | 11.394 | 1.00 | 0.00 |
| H           |    |     |     |        |        |        |      |      |
| HETATM11989 | H7 | PRP | 838 | 24.282 | 36.290 | 11.709 | 1.00 | 0.00 |
| H           |    |     |     |        |        |        |      |      |
| HETATM11990 | H8 | PRP | 838 | 22.960 | 36.228 | 12.998 | 1.00 | 0.00 |
| H           |    |     |     |        |        |        |      |      |
| HETATM11991 | O1 | PRP | 839 | 50.787 | 31.480 | 3.267  | 1.00 | 0.00 |
| O           |    |     |     |        |        |        |      |      |
| HETATM11992 | H1 | PRP | 839 | 50.071 | 30.911 | 3.558  | 1.00 | 0.00 |
| H           |    |     |     |        |        |        |      |      |
| HETATM11993 | C1 | PRP | 839 | 50.721 | 32.670 | 4.045  | 1.00 | 0.00 |
| C           |    |     |     |        |        |        |      |      |
| HETATM11994 | H2 | PRP | 839 | 51.752 | 33.016 | 4.120  | 1.00 | 0.00 |
| H           |    |     |     |        |        |        |      |      |
| HETATM11995 | H3 | PRP | 839 | 50.131 | 33.460 | 3.580  | 1.00 | 0.00 |
| H           |    |     |     |        |        |        |      |      |
| HETATM11996 | C2 | PRP | 839 | 50.273 | 32.462 | 5.496  | 1.00 | 0.00 |
| C           |    |     |     |        |        |        |      |      |
| HETATM11997 | H4 | PRP | 839 | 50.694 | 31.545 | 5.908  | 1.00 | 0.00 |
| H           |    |     |     |        |        |        |      |      |
| HETATM11998 | O2 | PRP | 839 | 48.928 | 32.310 | 5.491  | 1.00 | 0.00 |
| O           |    |     |     |        |        |        |      |      |
| HETATM11999 | H5 | PRP | 839 | 48.624 | 31.443 | 5.213  | 1.00 | 0.00 |
| H           |    |     |     |        |        |        |      |      |
| HETATM12000 | C3 | PRP | 839 | 50.670 | 33.669 | 6.383  | 1.00 | 0.00 |
| C           |    |     |     |        |        |        |      |      |
| HETATM12001 | H6 | PRP | 839 | 51.741 | 33.769 | 6.206  | 1.00 | 0.00 |
| H           |    |     |     |        |        |        |      |      |
| HETATM12002 | H7 | PRP | 839 | 50.282 | 34.575 | 5.917  | 1.00 | 0.00 |
| H           |    |     |     |        |        |        |      |      |
| HETATM12003 | H8 | PRP | 839 | 50.422 | 33.545 | 7.437  | 1.00 | 0.00 |
| H           |    |     |     |        |        |        |      |      |
| HETATM12004 | O1 | PRP | 840 | 34.488 | 42.571 | 9.777  | 1.00 | 0.00 |
| O           |    |     |     |        |        |        |      |      |
| HETATM12005 | H1 | PRP | 840 | 34.773 | 43.428 | 9.452  | 1.00 | 0.00 |
| H           |    |     |     |        |        |        |      |      |
| HETATM12006 | C1 | PRP | 840 | 35.509 | 42.074 | 10.627 | 1.00 | 0.00 |
| C           |    |     |     |        |        |        |      |      |
| HETATM12007 | H2 | PRP | 840 | 35.543 | 42.625 | 11.567 | 1.00 | 0.00 |
| H           |    |     |     |        |        |        |      |      |
| HETATM12008 | H3 | PRP | 840 | 35.197 | 41.092 | 10.984 | 1.00 | 0.00 |
| H           |    |     |     |        |        |        |      |      |
| HETATM12009 | C2 | PRP | 840 | 36.829 | 42.156 | 9.902  | 1.00 | 0.00 |
| C           |    |     |     |        |        |        |      |      |
| HETATM12010 | H4 | PRP | 840 | 37.618 | 41.854 | 10.592 | 1.00 | 0.00 |
| H           |    |     |     |        |        |        |      |      |
| HETATM12011 | O2 | PRP | 840 | 37.006 | 43.525 | 9.536  | 1.00 | 0.00 |
| O           |    |     |     |        |        |        |      |      |



|             |    |     |     |         |        |        |      |      |
|-------------|----|-----|-----|---------|--------|--------|------|------|
| HETATM12012 | H5 | PRP | 840 | 37.146  | 44.019 | 10.347 | 1.00 | 0.00 |
| H           |    |     |     |         |        |        |      |      |
| HETATM12013 | C3 | PRP | 840 | 36.903  | 41.308 | 8.638  | 1.00 | 0.00 |
| C           |    |     |     |         |        |        |      |      |
| HETATM12014 | H6 | PRP | 840 | 36.597  | 40.262 | 8.654  | 1.00 | 0.00 |
| H           |    |     |     |         |        |        |      |      |
| HETATM12015 | H7 | PRP | 840 | 36.326  | 41.830 | 7.875  | 1.00 | 0.00 |
| H           |    |     |     |         |        |        |      |      |
| HETATM12016 | H8 | PRP | 840 | 37.926  | 41.401 | 8.273  | 1.00 | 0.00 |
| H           |    |     |     |         |        |        |      |      |
| HETATM12017 | O1 | PRP | 841 | 23.574  | 34.832 | 8.044  | 1.00 | 0.00 |
| O           |    |     |     |         |        |        |      |      |
| HETATM12018 | H1 | PRP | 841 | 23.745  | 34.531 | 8.939  | 1.00 | 0.00 |
| H           |    |     |     |         |        |        |      |      |
| HETATM12019 | C1 | PRP | 841 | 24.363  | 35.891 | 7.588  | 1.00 | 0.00 |
| C           |    |     |     |         |        |        |      |      |
| HETATM12020 | H2 | PRP | 841 | 25.415  | 35.745 | 7.831  | 1.00 | 0.00 |
| H           |    |     |     |         |        |        |      |      |
| HETATM12021 | H3 | PRP | 841 | 24.354  | 35.891 | 6.498  | 1.00 | 0.00 |
| H           |    |     |     |         |        |        |      |      |
| HETATM12022 | C2 | PRP | 841 | 23.868  | 37.206 | 8.330  | 1.00 | 0.00 |
| C           |    |     |     |         |        |        |      |      |
| HETATM12023 | H4 | PRP | 841 | 24.129  | 37.182 | 9.387  | 1.00 | 0.00 |
| H           |    |     |     |         |        |        |      |      |
| HETATM12024 | O2 | PRP | 841 | 22.486  | 37.398 | 8.332  | 1.00 | 0.00 |
| O           |    |     |     |         |        |        |      |      |
| HETATM12025 | H5 | PRP | 841 | 22.278  | 36.968 | 7.499  | 1.00 | 0.00 |
| H           |    |     |     |         |        |        |      |      |
| HETATM12026 | C3 | PRP | 841 | 24.538  | 38.447 | 7.729  | 1.00 | 0.00 |
| C           |    |     |     |         |        |        |      |      |
| HETATM12027 | H6 | PRP | 841 | 25.628  | 38.441 | 7.756  | 1.00 | 0.00 |
| H           |    |     |     |         |        |        |      |      |
| HETATM12028 | H7 | PRP | 841 | 24.307  | 38.558 | 6.670  | 1.00 | 0.00 |
| H           |    |     |     |         |        |        |      |      |
| HETATM12029 | H8 | PRP | 841 | 24.290  | 39.264 | 8.406  | 1.00 | 0.00 |
| H           |    |     |     |         |        |        |      |      |
| HETATM12030 | O1 | PRP | 842 | -13.453 | 28.978 | 45.374 | 1.00 | 0.00 |
| O           |    |     |     |         |        |        |      |      |
| HETATM12031 | H1 | PRP | 842 | -14.232 | 28.693 | 44.890 | 1.00 | 0.00 |
| H           |    |     |     |         |        |        |      |      |
| HETATM12032 | C1 | PRP | 842 | -12.613 | 27.838 | 45.636 | 1.00 | 0.00 |
| C           |    |     |     |         |        |        |      |      |
| HETATM12033 | H2 | PRP | 842 | -11.635 | 28.255 | 45.877 | 1.00 | 0.00 |
| H           |    |     |     |         |        |        |      |      |
| HETATM12034 | H3 | PRP | 842 | -13.031 | 27.255 | 46.457 | 1.00 | 0.00 |
| H           |    |     |     |         |        |        |      |      |
| HETATM12035 | C2 | PRP | 842 | -12.482 | 26.928 | 44.367 | 1.00 | 0.00 |
| C           |    |     |     |         |        |        |      |      |
| HETATM12036 | H4 | PRP | 842 | -12.264 | 27.590 | 43.529 | 1.00 | 0.00 |
| H           |    |     |     |         |        |        |      |      |
| HETATM12037 | O2 | PRP | 842 | -13.585 | 26.052 | 44.217 | 1.00 | 0.00 |
| O           |    |     |     |         |        |        |      |      |
| HETATM12038 | H5 | PRP | 842 | -14.282 | 26.514 | 43.745 | 1.00 | 0.00 |
| H           |    |     |     |         |        |        |      |      |
| HETATM12039 | C3 | PRP | 842 | -11.247 | 26.037 | 44.464 | 1.00 | 0.00 |
| C           |    |     |     |         |        |        |      |      |

|             |    |     |     |         |        |        |      |      |
|-------------|----|-----|-----|---------|--------|--------|------|------|
| HETATM12040 | H6 | PRP | 842 | -11.342 | 25.510 | 45.413 | 1.00 | 0.00 |
| H           |    |     |     |         |        |        |      |      |
| HETATM12041 | H7 | PRP | 842 | -11.296 | 25.268 | 43.693 | 1.00 | 0.00 |
| H           |    |     |     |         |        |        |      |      |
| HETATM12042 | H8 | PRP | 842 | -10.378 | 26.694 | 44.436 | 1.00 | 0.00 |
| H           |    |     |     |         |        |        |      |      |
| HETATM12043 | O1 | PRP | 843 | 3.064   | 25.145 | 21.040 | 1.00 | 0.00 |
| O           |    |     |     |         |        |        |      |      |
| HETATM12044 | H1 | PRP | 843 | 3.262   | 25.087 | 21.977 | 1.00 | 0.00 |
| H           |    |     |     |         |        |        |      |      |
| HETATM12045 | C1 | PRP | 843 | 4.253   | 24.932 | 20.285 | 1.00 | 0.00 |
| C           |    |     |     |         |        |        |      |      |
| HETATM12046 | H2 | PRP | 843 | 4.604   | 23.978 | 20.680 | 1.00 | 0.00 |
| H           |    |     |     |         |        |        |      |      |
| HETATM12047 | H3 | PRP | 843 | 4.025   | 24.844 | 19.223 | 1.00 | 0.00 |
| H           |    |     |     |         |        |        |      |      |
| HETATM12048 | C2 | PRP | 843 | 5.338   | 25.993 | 20.496 | 1.00 | 0.00 |
| C           |    |     |     |         |        |        |      |      |
| HETATM12049 | H4 | PRP | 843 | 5.389   | 26.197 | 21.565 | 1.00 | 0.00 |
| H           |    |     |     |         |        |        |      |      |
| HETATM12050 | O2 | PRP | 843 | 4.951   | 27.070 | 19.663 | 1.00 | 0.00 |
| O           |    |     |     |         |        |        |      |      |
| HETATM12051 | H5 | PRP | 843 | 3.993   | 27.006 | 19.674 | 1.00 | 0.00 |
| H           |    |     |     |         |        |        |      |      |
| HETATM12052 | C3 | PRP | 843 | 6.669   | 25.474 | 19.935 | 1.00 | 0.00 |
| C           |    |     |     |         |        |        |      |      |
| HETATM12053 | H6 | PRP | 843 | 6.733   | 24.387 | 19.991 | 1.00 | 0.00 |
| H           |    |     |     |         |        |        |      |      |
| HETATM12054 | H7 | PRP | 843 | 6.842   | 25.889 | 18.942 | 1.00 | 0.00 |
| H           |    |     |     |         |        |        |      |      |
| HETATM12055 | H8 | PRP | 843 | 7.478   | 25.860 | 20.555 | 1.00 | 0.00 |
| H           |    |     |     |         |        |        |      |      |
| HETATM12056 | O1 | PRP | 844 | 3.793   | 37.122 | 33.544 | 1.00 | 0.00 |
| O           |    |     |     |         |        |        |      |      |
| HETATM12057 | H1 | PRP | 844 | 2.881   | 37.320 | 33.769 | 1.00 | 0.00 |
| H           |    |     |     |         |        |        |      |      |
| HETATM12058 | C1 | PRP | 844 | 3.741   | 36.014 | 32.599 | 1.00 | 0.00 |
| C           |    |     |     |         |        |        |      |      |
| HETATM12059 | H2 | PRP | 844 | 3.141   | 35.202 | 33.008 | 1.00 | 0.00 |
| H           |    |     |     |         |        |        |      |      |
| HETATM12060 | H3 | PRP | 844 | 3.351   | 36.472 | 31.690 | 1.00 | 0.00 |
| H           |    |     |     |         |        |        |      |      |
| HETATM12061 | C2 | PRP | 844 | 5.128   | 35.374 | 32.395 | 1.00 | 0.00 |
| C           |    |     |     |         |        |        |      |      |
| HETATM12062 | H4 | PRP | 844 | 5.477   | 34.896 | 33.311 | 1.00 | 0.00 |
| H           |    |     |     |         |        |        |      |      |
| HETATM12063 | O2 | PRP | 844 | 6.179   | 36.136 | 31.844 | 1.00 | 0.00 |
| O           |    |     |     |         |        |        |      |      |
| HETATM12064 | H5 | PRP | 844 | 6.315   | 36.879 | 32.436 | 1.00 | 0.00 |
| H           |    |     |     |         |        |        |      |      |
| HETATM12065 | C3 | PRP | 844 | 5.080   | 34.241 | 31.343 | 1.00 | 0.00 |
| C           |    |     |     |         |        |        |      |      |
| HETATM12066 | H6 | PRP | 844 | 4.131   | 33.738 | 31.532 | 1.00 | 0.00 |
| H           |    |     |     |         |        |        |      |      |
| HETATM12067 | H7 | PRP | 844 | 5.123   | 34.576 | 30.307 | 1.00 | 0.00 |
| H           |    |     |     |         |        |        |      |      |

|             |    |     |     |        |        |        |      |      |
|-------------|----|-----|-----|--------|--------|--------|------|------|
| HETATM12068 | H8 | PRP | 844 | 5.884  | 33.532 | 31.540 | 1.00 | 0.00 |
| H           |    |     |     |        |        |        |      |      |
| HETATM12069 | O1 | PRP | 845 | 2.964  | 41.811 | 27.282 | 1.00 | 0.00 |
| O           |    |     |     |        |        |        |      |      |
| HETATM12070 | H1 | PRP | 845 | 3.813  | 42.203 | 27.501 | 1.00 | 0.00 |
| H           |    |     |     |        |        |        |      |      |
| HETATM12071 | C1 | PRP | 845 | 2.626  | 40.821 | 28.283 | 1.00 | 0.00 |
| C           |    |     |     |        |        |        |      |      |
| HETATM12072 | H2 | PRP | 845 | 3.479  | 40.147 | 28.351 | 1.00 | 0.00 |
| H           |    |     |     |        |        |        |      |      |
| HETATM12073 | H3 | PRP | 845 | 2.468  | 41.348 | 29.224 | 1.00 | 0.00 |
| H           |    |     |     |        |        |        |      |      |
| HETATM12074 | C2 | PRP | 845 | 1.478  | 39.903 | 27.785 | 1.00 | 0.00 |
| C           |    |     |     |        |        |        |      |      |
| HETATM12075 | H4 | PRP | 845 | 1.276  | 39.073 | 28.463 | 1.00 | 0.00 |
| H           |    |     |     |        |        |        |      |      |
| HETATM12076 | O2 | PRP | 845 | 1.930  | 39.386 | 26.513 | 1.00 | 0.00 |
| O           |    |     |     |        |        |        |      |      |
| HETATM12077 | H5 | PRP | 845 | 2.453  | 40.151 | 26.263 | 1.00 | 0.00 |
| H           |    |     |     |        |        |        |      |      |
| HETATM12078 | C3 | PRP | 845 | 0.167  | 40.570 | 27.491 | 1.00 | 0.00 |
| C           |    |     |     |        |        |        |      |      |
| HETATM12079 | H6 | PRP | 845 | -0.197 | 41.102 | 28.370 | 1.00 | 0.00 |
| H           |    |     |     |        |        |        |      |      |
| HETATM12080 | H7 | PRP | 845 | 0.241  | 41.324 | 26.707 | 1.00 | 0.00 |
| H           |    |     |     |        |        |        |      |      |
| HETATM12081 | H8 | PRP | 845 | -0.587 | 39.899 | 27.082 | 1.00 | 0.00 |
| H           |    |     |     |        |        |        |      |      |
| HETATM12082 | O1 | PRP | 846 | -9.094 | 26.431 | 29.371 | 1.00 | 0.00 |
| O           |    |     |     |        |        |        |      |      |
| HETATM12083 | H1 | PRP | 846 | -9.105 | 26.671 | 30.300 | 1.00 | 0.00 |
| H           |    |     |     |        |        |        |      |      |
| HETATM12084 | C1 | PRP | 846 | -8.525 | 27.439 | 28.533 | 1.00 | 0.00 |
| C           |    |     |     |        |        |        |      |      |
| HETATM12085 | H2 | PRP | 846 | -9.327 | 28.165 | 28.397 | 1.00 | 0.00 |
| H           |    |     |     |        |        |        |      |      |
| HETATM12086 | H3 | PRP | 846 | -7.684 | 27.956 | 28.995 | 1.00 | 0.00 |
| H           |    |     |     |        |        |        |      |      |
| HETATM12087 | C2 | PRP | 846 | -8.104 | 26.747 | 27.265 | 1.00 | 0.00 |
| C           |    |     |     |        |        |        |      |      |
| HETATM12088 | H4 | PRP | 846 | -7.585 | 27.475 | 26.641 | 1.00 | 0.00 |
| H           |    |     |     |        |        |        |      |      |
| HETATM12089 | O2 | PRP | 846 | -9.284 | 26.269 | 26.650 | 1.00 | 0.00 |
| O           |    |     |     |        |        |        |      |      |
| HETATM12090 | H5 | PRP | 846 | -9.768 | 26.066 | 27.454 | 1.00 | 0.00 |
| H           |    |     |     |        |        |        |      |      |
| HETATM12091 | C3 | PRP | 846 | -7.154 | 25.564 | 27.587 | 1.00 | 0.00 |
| C           |    |     |     |        |        |        |      |      |
| HETATM12092 | H6 | PRP | 846 | -6.548 | 25.238 | 26.742 | 1.00 | 0.00 |
| H           |    |     |     |        |        |        |      |      |
| HETATM12093 | H7 | PRP | 846 | -6.291 | 25.795 | 28.211 | 1.00 | 0.00 |
| H           |    |     |     |        |        |        |      |      |
| HETATM12094 | H8 | PRP | 846 | -7.722 | 24.801 | 28.118 | 1.00 | 0.00 |
| H           |    |     |     |        |        |        |      |      |
| HETATM12095 | O1 | PRP | 847 | 13.208 | 35.518 | 30.231 | 1.00 | 0.00 |
| O           |    |     |     |        |        |        |      |      |

|             |    |     |     |         |        |        |      |      |
|-------------|----|-----|-----|---------|--------|--------|------|------|
| HETATM12096 | H1 | PRP | 847 | 12.306  | 35.339 | 29.956 | 1.00 | 0.00 |
| H           |    |     |     |         |        |        |      |      |
| HETATM12097 | C1 | PRP | 847 | 13.231  | 36.392 | 31.350 | 1.00 | 0.00 |
| C           |    |     |     |         |        |        |      |      |
| HETATM12098 | H2 | PRP | 847 | 14.285  | 36.598 | 31.535 | 1.00 | 0.00 |
| H           |    |     |     |         |        |        |      |      |
| HETATM12099 | H3 | PRP | 847 | 12.771  | 37.337 | 31.060 | 1.00 | 0.00 |
| H           |    |     |     |         |        |        |      |      |
| HETATM12100 | C2 | PRP | 847 | 12.419  | 35.892 | 32.562 | 1.00 | 0.00 |
| C           |    |     |     |         |        |        |      |      |
| HETATM12101 | H4 | PRP | 847 | 12.943  | 34.970 | 32.815 | 1.00 | 0.00 |
| H           |    |     |     |         |        |        |      |      |
| HETATM12102 | O2 | PRP | 847 | 11.041  | 35.712 | 32.447 | 1.00 | 0.00 |
| O           |    |     |     |         |        |        |      |      |
| HETATM12103 | H5 | PRP | 847 | 10.750  | 35.934 | 31.560 | 1.00 | 0.00 |
| H           |    |     |     |         |        |        |      |      |
| HETATM12104 | C3 | PRP | 847 | 12.503  | 36.833 | 33.749 | 1.00 | 0.00 |
| C           |    |     |     |         |        |        |      |      |
| HETATM12105 | H6 | PRP | 847 | 12.076  | 37.806 | 33.505 | 1.00 | 0.00 |
| H           |    |     |     |         |        |        |      |      |
| HETATM12106 | H7 | PRP | 847 | 11.909  | 36.436 | 34.572 | 1.00 | 0.00 |
| H           |    |     |     |         |        |        |      |      |
| HETATM12107 | H8 | PRP | 847 | 13.552  | 36.857 | 34.045 | 1.00 | 0.00 |
| H           |    |     |     |         |        |        |      |      |
| HETATM12108 | O1 | PRP | 848 | -11.798 | 39.646 | 22.568 | 1.00 | 0.00 |
| O           |    |     |     |         |        |        |      |      |
| HETATM12109 | H1 | PRP | 848 | -12.645 | 39.451 | 22.976 | 1.00 | 0.00 |
| H           |    |     |     |         |        |        |      |      |
| HETATM12110 | C1 | PRP | 848 | -10.744 | 39.296 | 23.432 | 1.00 | 0.00 |
| C           |    |     |     |         |        |        |      |      |
| HETATM12111 | H2 | PRP | 848 | -10.479 | 38.260 | 23.222 | 1.00 | 0.00 |
| H           |    |     |     |         |        |        |      |      |
| HETATM12112 | H3 | PRP | 848 | -9.842  | 39.867 | 23.208 | 1.00 | 0.00 |
| H           |    |     |     |         |        |        |      |      |
| HETATM12113 | C2 | PRP | 848 | -11.122 | 39.631 | 24.899 | 1.00 | 0.00 |
| C           |    |     |     |         |        |        |      |      |
| HETATM12114 | H4 | PRP | 848 | -12.106 | 39.269 | 25.196 | 1.00 | 0.00 |
| H           |    |     |     |         |        |        |      |      |
| HETATM12115 | O2 | PRP | 848 | -10.812 | 40.982 | 25.194 | 1.00 | 0.00 |
| O           |    |     |     |         |        |        |      |      |
| HETATM12116 | H5 | PRP | 848 | -10.891 | 41.056 | 26.148 | 1.00 | 0.00 |
| H           |    |     |     |         |        |        |      |      |
| HETATM12117 | C3 | PRP | 848 | -10.250 | 38.753 | 25.708 | 1.00 | 0.00 |
| C           |    |     |     |         |        |        |      |      |
| HETATM12118 | H6 | PRP | 848 | -10.375 | 37.709 | 25.420 | 1.00 | 0.00 |
| H           |    |     |     |         |        |        |      |      |
| HETATM12119 | H7 | PRP | 848 | -9.217  | 39.098 | 25.689 | 1.00 | 0.00 |
| H           |    |     |     |         |        |        |      |      |
| HETATM12120 | H8 | PRP | 848 | -10.505 | 38.908 | 26.757 | 1.00 | 0.00 |
| H           |    |     |     |         |        |        |      |      |
| HETATM12121 | O1 | PRP | 849 | -0.011  | 34.778 | 26.752 | 1.00 | 0.00 |
| O           |    |     |     |         |        |        |      |      |
| HETATM12122 | H1 | PRP | 849 | -0.107  | 35.546 | 26.183 | 1.00 | 0.00 |
| H           |    |     |     |         |        |        |      |      |
| HETATM12123 | C1 | PRP | 849 | -1.311  | 34.334 | 27.009 | 1.00 | 0.00 |
| C           |    |     |     |         |        |        |      |      |

|             |    |     |     |        |        |        |      |      |
|-------------|----|-----|-----|--------|--------|--------|------|------|
| HETATM12124 | H2 | PRP | 849 | -1.273 | 33.407 | 27.581 | 1.00 | 0.00 |
| H           |    |     |     |        |        |        |      |      |
| HETATM12125 | H3 | PRP | 849 | -1.880 | 35.005 | 27.653 | 1.00 | 0.00 |
| H           |    |     |     |        |        |        |      |      |
| HETATM12126 | C2 | PRP | 849 | -2.149 | 34.114 | 25.740 | 1.00 | 0.00 |
| C           |    |     |     |        |        |        |      |      |
| HETATM12127 | H4 | PRP | 849 | -1.564 | 33.458 | 25.096 | 1.00 | 0.00 |
| H           |    |     |     |        |        |        |      |      |
| HETATM12128 | O2 | PRP | 849 | -2.363 | 35.395 | 25.205 | 1.00 | 0.00 |
| O           |    |     |     |        |        |        |      |      |
| HETATM12129 | H5 | PRP | 849 | -2.725 | 35.395 | 24.316 | 1.00 | 0.00 |
| H           |    |     |     |        |        |        |      |      |
| HETATM12130 | C3 | PRP | 849 | -3.358 | 33.220 | 25.940 | 1.00 | 0.00 |
| C           |    |     |     |        |        |        |      |      |
| HETATM12131 | H6 | PRP | 849 | -3.203 | 32.141 | 25.965 | 1.00 | 0.00 |
| H           |    |     |     |        |        |        |      |      |
| HETATM12132 | H7 | PRP | 849 | -4.058 | 33.535 | 26.714 | 1.00 | 0.00 |
| H           |    |     |     |        |        |        |      |      |
| HETATM12133 | H8 | PRP | 849 | -3.950 | 33.395 | 25.042 | 1.00 | 0.00 |
| H           |    |     |     |        |        |        |      |      |
| HETATM12134 | O1 | PRP | 850 | 3.055  | 34.958 | 17.450 | 1.00 | 0.00 |
| O           |    |     |     |        |        |        |      |      |
| HETATM12135 | H1 | PRP | 850 | 3.203  | 34.322 | 16.747 | 1.00 | 0.00 |
| H           |    |     |     |        |        |        |      |      |
| HETATM12136 | C1 | PRP | 850 | 3.319  | 34.362 | 18.726 | 1.00 | 0.00 |
| C           |    |     |     |        |        |        |      |      |
| HETATM12137 | H2 | PRP | 850 | 4.369  | 34.107 | 18.865 | 1.00 | 0.00 |
| H           |    |     |     |        |        |        |      |      |
| HETATM12138 | H3 | PRP | 850 | 3.144  | 35.094 | 19.514 | 1.00 | 0.00 |
| H           |    |     |     |        |        |        |      |      |
| HETATM12139 | C2 | PRP | 850 | 2.508  | 33.085 | 18.843 | 1.00 | 0.00 |
| C           |    |     |     |        |        |        |      |      |
| HETATM12140 | H4 | PRP | 850 | 2.944  | 32.551 | 19.687 | 1.00 | 0.00 |
| H           |    |     |     |        |        |        |      |      |
| HETATM12141 | O2 | PRP | 850 | 2.798  | 32.311 | 17.681 | 1.00 | 0.00 |
| O           |    |     |     |        |        |        |      |      |
| HETATM12142 | H5 | PRP | 850 | 3.503  | 31.670 | 17.802 | 1.00 | 0.00 |
| H           |    |     |     |        |        |        |      |      |
| HETATM12143 | C3 | PRP | 850 | 1.043  | 33.117 | 18.903 | 1.00 | 0.00 |
| C           |    |     |     |        |        |        |      |      |
| HETATM12144 | H6 | PRP | 850 | 0.759  | 33.822 | 19.684 | 1.00 | 0.00 |
| H           |    |     |     |        |        |        |      |      |
| HETATM12145 | H7 | PRP | 850 | 0.635  | 33.541 | 17.985 | 1.00 | 0.00 |
| H           |    |     |     |        |        |        |      |      |
| HETATM12146 | H8 | PRP | 850 | 0.753  | 32.103 | 19.179 | 1.00 | 0.00 |
| H           |    |     |     |        |        |        |      |      |
| HETATM12147 | O1 | PRP | 851 | 1.365  | 35.182 | 39.117 | 1.00 | 0.00 |
| O           |    |     |     |        |        |        |      |      |
| HETATM12148 | H1 | PRP | 851 | 2.047  | 35.353 | 38.464 | 1.00 | 0.00 |
| H           |    |     |     |        |        |        |      |      |
| HETATM12149 | C1 | PRP | 851 | 0.690  | 36.443 | 39.055 | 1.00 | 0.00 |
| C           |    |     |     |        |        |        |      |      |
| HETATM12150 | H2 | PRP | 851 | -0.078 | 36.614 | 39.810 | 1.00 | 0.00 |
| H           |    |     |     |        |        |        |      |      |
| HETATM12151 | H3 | PRP | 851 | 1.503  | 37.161 | 39.165 | 1.00 | 0.00 |
| H           |    |     |     |        |        |        |      |      |

|             |    |     |     |        |        |        |      |      |
|-------------|----|-----|-----|--------|--------|--------|------|------|
| HETATM12152 | C2 | PRP | 851 | 0.167  | 36.685 | 37.622 | 1.00 | 0.00 |
| C           |    |     |     |        |        |        |      |      |
| HETATM12153 | H4 | PRP | 851 | -0.438 | 35.822 | 37.345 | 1.00 | 0.00 |
| H           |    |     |     |        |        |        |      |      |
| HETATM12154 | O2 | PRP | 851 | 1.284  | 36.886 | 36.672 | 1.00 | 0.00 |
| O           |    |     |     |        |        |        |      |      |
| HETATM12155 | H5 | PRP | 851 | 1.016  | 36.796 | 35.755 | 1.00 | 0.00 |
| H           |    |     |     |        |        |        |      |      |
| HETATM12156 | C3 | PRP | 851 | -0.628 | 38.001 | 37.607 | 1.00 | 0.00 |
| C           |    |     |     |        |        |        |      |      |
| HETATM12157 | H6 | PRP | 851 | -1.513 | 37.874 | 38.231 | 1.00 | 0.00 |
| H           |    |     |     |        |        |        |      |      |
| HETATM12158 | H7 | PRP | 851 | -0.009 | 38.812 | 37.990 | 1.00 | 0.00 |
| H           |    |     |     |        |        |        |      |      |
| HETATM12159 | H8 | PRP | 851 | -0.836 | 38.257 | 36.568 | 1.00 | 0.00 |
| H           |    |     |     |        |        |        |      |      |
| HETATM12160 | O1 | PRP | 852 | 12.204 | 39.066 | 24.513 | 1.00 | 0.00 |
| O           |    |     |     |        |        |        |      |      |
| HETATM12161 | H1 | PRP | 852 | 12.645 | 38.222 | 24.636 | 1.00 | 0.00 |
| H           |    |     |     |        |        |        |      |      |
| HETATM12162 | C1 | PRP | 852 | 12.813 | 39.819 | 23.512 | 1.00 | 0.00 |
| C           |    |     |     |        |        |        |      |      |
| HETATM12163 | H2 | PRP | 852 | 12.717 | 39.309 | 22.554 | 1.00 | 0.00 |
| H           |    |     |     |        |        |        |      |      |
| HETATM12164 | H3 | PRP | 852 | 12.260 | 40.753 | 23.412 | 1.00 | 0.00 |
| H           |    |     |     |        |        |        |      |      |
| HETATM12165 | C2 | PRP | 852 | 14.340 | 40.145 | 23.885 | 1.00 | 0.00 |
| C           |    |     |     |        |        |        |      |      |
| HETATM12166 | H4 | PRP | 852 | 14.493 | 39.973 | 24.950 | 1.00 | 0.00 |
| H           |    |     |     |        |        |        |      |      |
| HETATM12167 | O2 | PRP | 852 | 14.701 | 41.439 | 23.376 | 1.00 | 0.00 |
| O           |    |     |     |        |        |        |      |      |
| HETATM12168 | H5 | PRP | 852 | 14.158 | 42.049 | 23.881 | 1.00 | 0.00 |
| H           |    |     |     |        |        |        |      |      |
| HETATM12169 | C3 | PRP | 852 | 15.236 | 39.168 | 23.105 | 1.00 | 0.00 |
| C           |    |     |     |        |        |        |      |      |
| HETATM12170 | H6 | PRP | 852 | 14.934 | 38.125 | 23.195 | 1.00 | 0.00 |
| H           |    |     |     |        |        |        |      |      |
| HETATM12171 | H7 | PRP | 852 | 15.225 | 39.362 | 22.032 | 1.00 | 0.00 |
| H           |    |     |     |        |        |        |      |      |
| HETATM12172 | H8 | PRP | 852 | 16.285 | 39.150 | 23.400 | 1.00 | 0.00 |
| H           |    |     |     |        |        |        |      |      |
| HETATM12173 | O1 | PRP | 853 | 21.832 | 45.470 | 27.275 | 1.00 | 0.00 |
| O           |    |     |     |        |        |        |      |      |
| HETATM12174 | H1 | PRP | 853 | 20.998 | 45.645 | 27.717 | 1.00 | 0.00 |
| H           |    |     |     |        |        |        |      |      |
| HETATM12175 | C1 | PRP | 853 | 22.294 | 46.689 | 26.716 | 1.00 | 0.00 |
| C           |    |     |     |        |        |        |      |      |
| HETATM12176 | H2 | PRP | 853 | 22.527 | 47.279 | 27.603 | 1.00 | 0.00 |
| H           |    |     |     |        |        |        |      |      |
| HETATM12177 | H3 | PRP | 853 | 23.181 | 46.600 | 26.089 | 1.00 | 0.00 |
| H           |    |     |     |        |        |        |      |      |
| HETATM12178 | C2 | PRP | 853 | 21.179 | 47.436 | 25.928 | 1.00 | 0.00 |
| C           |    |     |     |        |        |        |      |      |
| HETATM12179 | H4 | PRP | 853 | 21.665 | 48.303 | 25.481 | 1.00 | 0.00 |
| H           |    |     |     |        |        |        |      |      |

|             |    |     |     |        |        |        |      |      |
|-------------|----|-----|-----|--------|--------|--------|------|------|
| HETATM12180 | O2 | PRP | 853 | 20.167 | 47.855 | 26.913 | 1.00 | 0.00 |
| O           |    |     |     |        |        |        |      |      |
| HETATM12181 | H5 | PRP | 853 | 20.052 | 47.114 | 27.512 | 1.00 | 0.00 |
| H           |    |     |     |        |        |        |      |      |
| HETATM12182 | C3 | PRP | 853 | 20.485 | 46.494 | 24.931 | 1.00 | 0.00 |
| C           |    |     |     |        |        |        |      |      |
| HETATM12183 | H6 | PRP | 853 | 19.743 | 45.845 | 25.398 | 1.00 | 0.00 |
| H           |    |     |     |        |        |        |      |      |
| HETATM12184 | H7 | PRP | 853 | 19.902 | 47.110 | 24.247 | 1.00 | 0.00 |
| H           |    |     |     |        |        |        |      |      |
| HETATM12185 | H8 | PRP | 853 | 21.196 | 45.995 | 24.274 | 1.00 | 0.00 |
| H           |    |     |     |        |        |        |      |      |
| HETATM12186 | O1 | PRP | 854 | 18.812 | 50.258 | 27.735 | 1.00 | 0.00 |
| O           |    |     |     |        |        |        |      |      |
| HETATM12187 | H1 | PRP | 854 | 19.139 | 49.567 | 27.155 | 1.00 | 0.00 |
| H           |    |     |     |        |        |        |      |      |
| HETATM12188 | C1 | PRP | 854 | 19.704 | 51.325 | 27.463 | 1.00 | 0.00 |
| C           |    |     |     |        |        |        |      |      |
| HETATM12189 | H2 | PRP | 854 | 19.540 | 51.602 | 26.421 | 1.00 | 0.00 |
| H           |    |     |     |        |        |        |      |      |
| HETATM12190 | H3 | PRP | 854 | 19.364 | 52.158 | 28.077 | 1.00 | 0.00 |
| H           |    |     |     |        |        |        |      |      |
| HETATM12191 | C2 | PRP | 854 | 21.177 | 51.113 | 27.927 | 1.00 | 0.00 |
| C           |    |     |     |        |        |        |      |      |
| HETATM12192 | H4 | PRP | 854 | 21.685 | 52.077 | 27.947 | 1.00 | 0.00 |
| H           |    |     |     |        |        |        |      |      |
| HETATM12193 | O2 | PRP | 854 | 21.933 | 50.403 | 27.012 | 1.00 | 0.00 |
| O           |    |     |     |        |        |        |      |      |
| HETATM12194 | H5 | PRP | 854 | 21.531 | 49.581 | 26.719 | 1.00 | 0.00 |
| H           |    |     |     |        |        |        |      |      |
| HETATM12195 | C3 | PRP | 854 | 21.178 | 50.516 | 29.327 | 1.00 | 0.00 |
| C           |    |     |     |        |        |        |      |      |
| HETATM12196 | H6 | PRP | 854 | 21.253 | 49.431 | 29.398 | 1.00 | 0.00 |
| H           |    |     |     |        |        |        |      |      |
| HETATM12197 | H7 | PRP | 854 | 22.075 | 50.897 | 29.816 | 1.00 | 0.00 |
| H           |    |     |     |        |        |        |      |      |
| HETATM12198 | H8 | PRP | 854 | 20.290 | 50.798 | 29.893 | 1.00 | 0.00 |
| H           |    |     |     |        |        |        |      |      |
| HETATM12199 | O1 | PRP | 855 | 0.332  | 37.461 | 25.576 | 1.00 | 0.00 |
| O           |    |     |     |        |        |        |      |      |
| HETATM12200 | H1 | PRP | 855 | 0.792  | 38.242 | 25.890 | 1.00 | 0.00 |
| H           |    |     |     |        |        |        |      |      |
| HETATM12201 | C1 | PRP | 855 | 0.583  | 37.028 | 24.214 | 1.00 | 0.00 |
| C           |    |     |     |        |        |        |      |      |
| HETATM12202 | H2 | PRP | 855 | 1.049  | 36.048 | 24.317 | 1.00 | 0.00 |
| H           |    |     |     |        |        |        |      |      |
| HETATM12203 | H3 | PRP | 855 | -0.376 | 36.950 | 23.703 | 1.00 | 0.00 |
| H           |    |     |     |        |        |        |      |      |
| HETATM12204 | C2 | PRP | 855 | 1.469  | 37.970 | 23.435 | 1.00 | 0.00 |
| C           |    |     |     |        |        |        |      |      |
| HETATM12205 | H4 | PRP | 855 | 2.394  | 37.948 | 24.011 | 1.00 | 0.00 |
| H           |    |     |     |        |        |        |      |      |
| HETATM12206 | O2 | PRP | 855 | 0.982  | 39.283 | 23.380 | 1.00 | 0.00 |
| O           |    |     |     |        |        |        |      |      |
| HETATM12207 | H5 | PRP | 855 | 0.218  | 39.236 | 22.801 | 1.00 | 0.00 |
| H           |    |     |     |        |        |        |      |      |

|             |    |     |     |         |        |        |      |      |
|-------------|----|-----|-----|---------|--------|--------|------|------|
| HETATM12208 | C3 | PRP | 855 | 1.753   | 37.540 | 22.085 | 1.00 | 0.00 |
| C           |    |     |     |         |        |        |      |      |
| HETATM12209 | H6 | PRP | 855 | 2.161   | 36.529 | 22.120 | 1.00 | 0.00 |
| H           |    |     |     |         |        |        |      |      |
| HETATM12210 | H7 | PRP | 855 | 0.811   | 37.524 | 21.538 | 1.00 | 0.00 |
| H           |    |     |     |         |        |        |      |      |
| HETATM12211 | H8 | PRP | 855 | 2.446   | 38.159 | 21.515 | 1.00 | 0.00 |
| H           |    |     |     |         |        |        |      |      |
| HETATM12212 | O1 | PRP | 856 | -13.470 | 39.356 | 13.423 | 1.00 | 0.00 |
| O           |    |     |     |         |        |        |      |      |
| HETATM12213 | H1 | PRP | 856 | -13.216 | 38.753 | 14.126 | 1.00 | 0.00 |
| H           |    |     |     |         |        |        |      |      |
| HETATM12214 | C1 | PRP | 856 | -13.380 | 40.770 | 13.838 | 1.00 | 0.00 |
| C           |    |     |     |         |        |        |      |      |
| HETATM12215 | H2 | PRP | 856 | -13.908 | 41.347 | 13.079 | 1.00 | 0.00 |
| H           |    |     |     |         |        |        |      |      |
| HETATM12216 | H3 | PRP | 856 | -13.947 | 41.024 | 14.733 | 1.00 | 0.00 |
| H           |    |     |     |         |        |        |      |      |
| HETATM12217 | C2 | PRP | 856 | -11.948 | 41.226 | 13.967 | 1.00 | 0.00 |
| C           |    |     |     |         |        |        |      |      |
| HETATM12218 | H4 | PRP | 856 | -11.455 | 40.764 | 13.112 | 1.00 | 0.00 |
| H           |    |     |     |         |        |        |      |      |
| HETATM12219 | O2 | PRP | 856 | -11.309 | 40.686 | 15.151 | 1.00 | 0.00 |
| O           |    |     |     |         |        |        |      |      |
| HETATM12220 | H5 | PRP | 856 | -11.748 | 41.143 | 15.872 | 1.00 | 0.00 |
| H           |    |     |     |         |        |        |      |      |
| HETATM12221 | C3 | PRP | 856 | -11.771 | 42.754 | 13.926 | 1.00 | 0.00 |
| C           |    |     |     |         |        |        |      |      |
| HETATM12222 | H6 | PRP | 856 | -10.812 | 43.059 | 14.342 | 1.00 | 0.00 |
| H           |    |     |     |         |        |        |      |      |
| HETATM12223 | H7 | PRP | 856 | -11.885 | 43.020 | 12.875 | 1.00 | 0.00 |
| H           |    |     |     |         |        |        |      |      |
| HETATM12224 | H8 | PRP | 856 | -12.561 | 43.282 | 14.461 | 1.00 | 0.00 |
| H           |    |     |     |         |        |        |      |      |
| HETATM12225 | O1 | PRP | 857 | 7.887   | 41.666 | 34.843 | 1.00 | 0.00 |
| O           |    |     |     |         |        |        |      |      |
| HETATM12226 | H1 | PRP | 857 | 6.937   | 41.730 | 34.723 | 1.00 | 0.00 |
| H           |    |     |     |         |        |        |      |      |
| HETATM12227 | C1 | PRP | 857 | 8.446   | 42.930 | 34.540 | 1.00 | 0.00 |
| C           |    |     |     |         |        |        |      |      |
| HETATM12228 | H2 | PRP | 857 | 9.483   | 42.927 | 34.873 | 1.00 | 0.00 |
| H           |    |     |     |         |        |        |      |      |
| HETATM12229 | H3 | PRP | 857 | 8.282   | 43.099 | 33.475 | 1.00 | 0.00 |
| H           |    |     |     |         |        |        |      |      |
| HETATM12230 | C2 | PRP | 857 | 7.554   | 43.913 | 35.339 | 1.00 | 0.00 |
| C           |    |     |     |         |        |        |      |      |
| HETATM12231 | H4 | PRP | 857 | 7.640   | 43.631 | 36.388 | 1.00 | 0.00 |
| H           |    |     |     |         |        |        |      |      |
| HETATM12232 | O2 | PRP | 857 | 6.165   | 43.848 | 34.958 | 1.00 | 0.00 |
| O           |    |     |     |         |        |        |      |      |
| HETATM12233 | H5 | PRP | 857 | 5.623   | 43.353 | 35.577 | 1.00 | 0.00 |
| H           |    |     |     |         |        |        |      |      |
| HETATM12234 | C3 | PRP | 857 | 7.974   | 45.334 | 35.031 | 1.00 | 0.00 |
| C           |    |     |     |         |        |        |      |      |
| HETATM12235 | H6 | PRP | 857 | 7.279   | 46.060 | 35.454 | 1.00 | 0.00 |
| H           |    |     |     |         |        |        |      |      |



|             |    |     |     |        |        |        |      |      |
|-------------|----|-----|-----|--------|--------|--------|------|------|
| HETATM12236 | H7 | PRP | 857 | 8.963  | 45.595 | 35.408 | 1.00 | 0.00 |
| H           |    |     |     |        |        |        |      |      |
| HETATM12237 | H8 | PRP | 857 | 7.948  | 45.533 | 33.960 | 1.00 | 0.00 |
| H           |    |     |     |        |        |        |      |      |
| HETATM12238 | O1 | PRP | 858 | -4.306 | 26.537 | 18.264 | 1.00 | 0.00 |
| O           |    |     |     |        |        |        |      |      |
| HETATM12239 | H1 | PRP | 858 | -5.138 | 26.737 | 18.699 | 1.00 | 0.00 |
| H           |    |     |     |        |        |        |      |      |
| HETATM12240 | C1 | PRP | 858 | -3.947 | 27.368 | 17.220 | 1.00 | 0.00 |
| C           |    |     |     |        |        |        |      |      |
| HETATM12241 | H2 | PRP | 858 | -3.392 | 26.784 | 16.486 | 1.00 | 0.00 |
| H           |    |     |     |        |        |        |      |      |
| HETATM12242 | H3 | PRP | 858 | -4.784 | 27.930 | 16.805 | 1.00 | 0.00 |
| H           |    |     |     |        |        |        |      |      |
| HETATM12243 | C2 | PRP | 858 | -2.983 | 28.426 | 17.740 | 1.00 | 0.00 |
| C           |    |     |     |        |        |        |      |      |
| HETATM12244 | H4 | PRP | 858 | -2.271 | 27.928 | 18.398 | 1.00 | 0.00 |
| H           |    |     |     |        |        |        |      |      |
| HETATM12245 | O2 | PRP | 858 | -3.643 | 29.370 | 18.510 | 1.00 | 0.00 |
| O           |    |     |     |        |        |        |      |      |
| HETATM12246 | H5 | PRP | 858 | -4.319 | 28.916 | 19.018 | 1.00 | 0.00 |
| H           |    |     |     |        |        |        |      |      |
| HETATM12247 | C3 | PRP | 858 | -2.350 | 29.175 | 16.587 | 1.00 | 0.00 |
| C           |    |     |     |        |        |        |      |      |
| HETATM12248 | H6 | PRP | 858 | -1.510 | 29.725 | 17.013 | 1.00 | 0.00 |
| H           |    |     |     |        |        |        |      |      |
| HETATM12249 | H7 | PRP | 858 | -2.011 | 28.459 | 15.838 | 1.00 | 0.00 |
| H           |    |     |     |        |        |        |      |      |
| HETATM12250 | H8 | PRP | 858 | -3.040 | 29.816 | 16.038 | 1.00 | 0.00 |
| H           |    |     |     |        |        |        |      |      |
| HETATM12251 | O1 | PRP | 859 | 4.680  | 30.766 | 18.652 | 1.00 | 0.00 |
| O           |    |     |     |        |        |        |      |      |
| HETATM12252 | H1 | PRP | 859 | 5.319  | 30.128 | 18.327 | 1.00 | 0.00 |
| H           |    |     |     |        |        |        |      |      |
| HETATM12253 | C1 | PRP | 859 | 4.615  | 30.465 | 20.049 | 1.00 | 0.00 |
| C           |    |     |     |        |        |        |      |      |
| HETATM12254 | H2 | PRP | 859 | 4.176  | 31.307 | 20.582 | 1.00 | 0.00 |
| H           |    |     |     |        |        |        |      |      |
| HETATM12255 | H3 | PRP | 859 | 3.878  | 29.674 | 20.187 | 1.00 | 0.00 |
| H           |    |     |     |        |        |        |      |      |
| HETATM12256 | C2 | PRP | 859 | 5.969  | 30.074 | 20.715 | 1.00 | 0.00 |
| C           |    |     |     |        |        |        |      |      |
| HETATM12257 | H4 | PRP | 859 | 6.523  | 31.011 | 20.776 | 1.00 | 0.00 |
| H           |    |     |     |        |        |        |      |      |
| HETATM12258 | O2 | PRP | 859 | 6.744  | 29.201 | 19.948 | 1.00 | 0.00 |
| O           |    |     |     |        |        |        |      |      |
| HETATM12259 | H5 | PRP | 859 | 6.286  | 28.371 | 19.798 | 1.00 | 0.00 |
| H           |    |     |     |        |        |        |      |      |
| HETATM12260 | C3 | PRP | 859 | 5.764  | 29.461 | 22.160 | 1.00 | 0.00 |
| C           |    |     |     |        |        |        |      |      |
| HETATM12261 | H6 | PRP | 859 | 5.014  | 30.071 | 22.663 | 1.00 | 0.00 |
| H           |    |     |     |        |        |        |      |      |
| HETATM12262 | H7 | PRP | 859 | 5.359  | 28.461 | 22.004 | 1.00 | 0.00 |
| H           |    |     |     |        |        |        |      |      |
| HETATM12263 | H8 | PRP | 859 | 6.746  | 29.449 | 22.634 | 1.00 | 0.00 |
| H           |    |     |     |        |        |        |      |      |

|             |    |     |     |        |        |        |      |      |
|-------------|----|-----|-----|--------|--------|--------|------|------|
| HETATM12264 | O1 | PRP | 860 | -0.670 | 24.342 | 12.789 | 1.00 | 0.00 |
| O           |    |     |     |        |        |        |      |      |
| HETATM12265 | H1 | PRP | 860 | -0.477 | 23.635 | 12.168 | 1.00 | 0.00 |
| H           |    |     |     |        |        |        |      |      |
| HETATM12266 | C1 | PRP | 860 | -1.535 | 23.826 | 13.867 | 1.00 | 0.00 |
| C           |    |     |     |        |        |        |      |      |
| HETATM12267 | H2 | PRP | 860 | -1.115 | 22.898 | 14.255 | 1.00 | 0.00 |
| H           |    |     |     |        |        |        |      |      |
| HETATM12268 | H3 | PRP | 860 | -1.633 | 24.558 | 14.668 | 1.00 | 0.00 |
| H           |    |     |     |        |        |        |      |      |
| HETATM12269 | C2 | PRP | 860 | -2.968 | 23.496 | 13.384 | 1.00 | 0.00 |
| C           |    |     |     |        |        |        |      |      |
| HETATM12270 | H4 | PRP | 860 | -3.527 | 23.451 | 14.319 | 1.00 | 0.00 |
| H           |    |     |     |        |        |        |      |      |
| HETATM12271 | O2 | PRP | 860 | -3.061 | 22.217 | 12.887 | 1.00 | 0.00 |
| O           |    |     |     |        |        |        |      |      |
| HETATM12272 | H5 | PRP | 860 | -2.798 | 22.335 | 11.971 | 1.00 | 0.00 |
| H           |    |     |     |        |        |        |      |      |
| HETATM12273 | C3 | PRP | 860 | -3.561 | 24.546 | 12.524 | 1.00 | 0.00 |
| C           |    |     |     |        |        |        |      |      |
| HETATM12274 | H6 | PRP | 860 | -3.605 | 25.521 | 13.009 | 1.00 | 0.00 |
| H           |    |     |     |        |        |        |      |      |
| HETATM12275 | H7 | PRP | 860 | -2.898 | 24.695 | 11.672 | 1.00 | 0.00 |
| H           |    |     |     |        |        |        |      |      |
| HETATM12276 | H8 | PRP | 860 | -4.557 | 24.279 | 12.172 | 1.00 | 0.00 |
| H           |    |     |     |        |        |        |      |      |
| HETATM12277 | O1 | PRP | 861 | -6.551 | 22.498 | 14.084 | 1.00 | 0.00 |
| O           |    |     |     |        |        |        |      |      |
| HETATM12278 | H1 | PRP | 861 | -6.620 | 21.840 | 13.387 | 1.00 | 0.00 |
| H           |    |     |     |        |        |        |      |      |
| HETATM12279 | C1 | PRP | 861 | -6.847 | 21.811 | 15.294 | 1.00 | 0.00 |
| C           |    |     |     |        |        |        |      |      |
| HETATM12280 | H2 | PRP | 861 | -7.837 | 22.159 | 15.589 | 1.00 | 0.00 |
| H           |    |     |     |        |        |        |      |      |
| HETATM12281 | H3 | PRP | 861 | -6.794 | 20.726 | 15.206 | 1.00 | 0.00 |
| H           |    |     |     |        |        |        |      |      |
| HETATM12282 | C2 | PRP | 861 | -5.673 | 22.290 | 16.234 | 1.00 | 0.00 |
| C           |    |     |     |        |        |        |      |      |
| HETATM12283 | H4 | PRP | 861 | -5.617 | 23.379 | 16.249 | 1.00 | 0.00 |
| H           |    |     |     |        |        |        |      |      |
| HETATM12284 | O2 | PRP | 861 | -4.382 | 21.781 | 15.956 | 1.00 | 0.00 |
| O           |    |     |     |        |        |        |      |      |
| HETATM12285 | H5 | PRP | 861 | -4.182 | 22.064 | 15.060 | 1.00 | 0.00 |
| H           |    |     |     |        |        |        |      |      |
| HETATM12286 | C3 | PRP | 861 | -5.924 | 21.857 | 17.615 | 1.00 | 0.00 |
| C           |    |     |     |        |        |        |      |      |
| HETATM12287 | H6 | PRP | 861 | -5.522 | 20.871 | 17.848 | 1.00 | 0.00 |
| H           |    |     |     |        |        |        |      |      |
| HETATM12288 | H7 | PRP | 861 | -5.548 | 22.528 | 18.388 | 1.00 | 0.00 |
| H           |    |     |     |        |        |        |      |      |
| HETATM12289 | H8 | PRP | 861 | -7.008 | 21.780 | 17.701 | 1.00 | 0.00 |
| H           |    |     |     |        |        |        |      |      |
| HETATM12290 | O1 | PRP | 862 | 3.351  | 13.928 | 27.383 | 1.00 | 0.00 |
| O           |    |     |     |        |        |        |      |      |
| HETATM12291 | H1 | PRP | 862 | 2.391  | 13.910 | 27.399 | 1.00 | 0.00 |
| H           |    |     |     |        |        |        |      |      |

|             |    |     |     |         |        |        |      |      |
|-------------|----|-----|-----|---------|--------|--------|------|------|
| HETATM12292 | C1 | PRP | 862 | 3.964   | 15.131 | 27.657 | 1.00 | 0.00 |
| C           |    |     |     |         |        |        |      |      |
| HETATM12293 | H2 | PRP | 862 | 3.836   | 15.345 | 28.718 | 1.00 | 0.00 |
| H           |    |     |     |         |        |        |      |      |
| HETATM12294 | H3 | PRP | 862 | 5.000   | 14.947 | 27.376 | 1.00 | 0.00 |
| H           |    |     |     |         |        |        |      |      |
| HETATM12295 | C2 | PRP | 862 | 3.418   | 16.197 | 26.647 | 1.00 | 0.00 |
| C           |    |     |     |         |        |        |      |      |
| HETATM12296 | H4 | PRP | 862 | 2.337   | 16.142 | 26.782 | 1.00 | 0.00 |
| H           |    |     |     |         |        |        |      |      |
| HETATM12297 | O2 | PRP | 862 | 3.973   | 15.858 | 25.453 | 1.00 | 0.00 |
| O           |    |     |     |         |        |        |      |      |
| HETATM12298 | H5 | PRP | 862 | 3.826   | 14.909 | 25.472 | 1.00 | 0.00 |
| H           |    |     |     |         |        |        |      |      |
| HETATM12299 | C3 | PRP | 862 | 3.955   | 17.652 | 26.967 | 1.00 | 0.00 |
| C           |    |     |     |         |        |        |      |      |
| HETATM12300 | H6 | PRP | 862 | 3.875   | 17.872 | 28.031 | 1.00 | 0.00 |
| H           |    |     |     |         |        |        |      |      |
| HETATM12301 | H7 | PRP | 862 | 5.029   | 17.710 | 26.789 | 1.00 | 0.00 |
| H           |    |     |     |         |        |        |      |      |
| HETATM12302 | H8 | PRP | 862 | 3.376   | 18.424 | 26.460 | 1.00 | 0.00 |
| H           |    |     |     |         |        |        |      |      |
| HETATM12303 | O1 | PRP | 863 | -0.582  | -2.401 | 37.042 | 1.00 | 0.00 |
| O           |    |     |     |         |        |        |      |      |
| HETATM12304 | H1 | PRP | 863 | -1.150  | -2.866 | 37.661 | 1.00 | 0.00 |
| H           |    |     |     |         |        |        |      |      |
| HETATM12305 | C1 | PRP | 863 | -0.535  | -3.269 | 35.920 | 1.00 | 0.00 |
| C           |    |     |     |         |        |        |      |      |
| HETATM12306 | H2 | PRP | 863 | 0.181   | -4.050 | 36.173 | 1.00 | 0.00 |
| H           |    |     |     |         |        |        |      |      |
| HETATM12307 | H3 | PRP | 863 | -1.494  | -3.733 | 35.690 | 1.00 | 0.00 |
| H           |    |     |     |         |        |        |      |      |
| HETATM12308 | C2 | PRP | 863 | -0.072  | -2.397 | 34.663 | 1.00 | 0.00 |
| C           |    |     |     |         |        |        |      |      |
| HETATM12309 | H4 | PRP | 863 | 0.774   | -1.741 | 34.867 | 1.00 | 0.00 |
| H           |    |     |     |         |        |        |      |      |
| HETATM12310 | O2 | PRP | 863 | -1.129  | -1.527 | 34.222 | 1.00 | 0.00 |
| O           |    |     |     |         |        |        |      |      |
| HETATM12311 | H5 | PRP | 863 | -1.817  | -1.582 | 34.889 | 1.00 | 0.00 |
| H           |    |     |     |         |        |        |      |      |
| HETATM12312 | C3 | PRP | 863 | 0.201   | -3.258 | 33.476 | 1.00 | 0.00 |
| C           |    |     |     |         |        |        |      |      |
| HETATM12313 | H6 | PRP | 863 | -0.623  | -3.937 | 33.259 | 1.00 | 0.00 |
| H           |    |     |     |         |        |        |      |      |
| HETATM12314 | H7 | PRP | 863 | 0.293   | -2.635 | 32.586 | 1.00 | 0.00 |
| H           |    |     |     |         |        |        |      |      |
| HETATM12315 | H8 | PRP | 863 | 1.057   | -3.929 | 33.531 | 1.00 | 0.00 |
| H           |    |     |     |         |        |        |      |      |
| HETATM12316 | O1 | PRP | 864 | -16.180 | 11.734 | 22.894 | 1.00 | 0.00 |
| O           |    |     |     |         |        |        |      |      |
| HETATM12317 | H1 | PRP | 864 | -16.545 | 11.485 | 22.042 | 1.00 | 0.00 |
| H           |    |     |     |         |        |        |      |      |
| HETATM12318 | C1 | PRP | 864 | -15.318 | 12.784 | 22.707 | 1.00 | 0.00 |
| C           |    |     |     |         |        |        |      |      |
| HETATM12319 | H2 | PRP | 864 | -14.480 | 12.461 | 22.090 | 1.00 | 0.00 |
| H           |    |     |     |         |        |        |      |      |

|             |    |     |     |         |        |        |      |      |
|-------------|----|-----|-----|---------|--------|--------|------|------|
| HETATM12320 | H3 | PRP | 864 | -15.923 | 13.572 | 22.259 | 1.00 | 0.00 |
| H           |    |     |     |         |        |        |      |      |
| HETATM12321 | C2 | PRP | 864 | -14.657 | 13.173 | 24.104 | 1.00 | 0.00 |
| C           |    |     |     |         |        |        |      |      |
| HETATM12322 | H4 | PRP | 864 | -13.979 | 14.007 | 23.922 | 1.00 | 0.00 |
| H           |    |     |     |         |        |        |      |      |
| HETATM12323 | O2 | PRP | 864 | -13.801 | 12.176 | 24.597 | 1.00 | 0.00 |
| O           |    |     |     |         |        |        |      |      |
| HETATM12324 | H5 | PRP | 864 | -14.398 | 11.476 | 24.871 | 1.00 | 0.00 |
| H           |    |     |     |         |        |        |      |      |
| HETATM12325 | C3 | PRP | 864 | -15.720 | 13.507 | 25.153 | 1.00 | 0.00 |
| C           |    |     |     |         |        |        |      |      |
| HETATM12326 | H6 | PRP | 864 | -16.276 | 14.333 | 24.709 | 1.00 | 0.00 |
| H           |    |     |     |         |        |        |      |      |
| HETATM12327 | H7 | PRP | 864 | -16.374 | 12.659 | 25.354 | 1.00 | 0.00 |
| H           |    |     |     |         |        |        |      |      |
| HETATM12328 | H8 | PRP | 864 | -15.235 | 13.816 | 26.079 | 1.00 | 0.00 |
| H           |    |     |     |         |        |        |      |      |
| HETATM12329 | O1 | PRP | 865 | -9.613  | 15.974 | 11.641 | 1.00 | 0.00 |
| O           |    |     |     |         |        |        |      |      |
| HETATM12330 | H1 | PRP | 865 | -8.706  | 15.722 | 11.829 | 1.00 | 0.00 |
| H           |    |     |     |         |        |        |      |      |
| HETATM12331 | C1 | PRP | 865 | -9.719  | 17.388 | 11.993 | 1.00 | 0.00 |
| C           |    |     |     |         |        |        |      |      |
| HETATM12332 | H2 | PRP | 865 | -10.768 | 17.419 | 12.286 | 1.00 | 0.00 |
| H           |    |     |     |         |        |        |      |      |
| HETATM12333 | H3 | PRP | 865 | -9.034  | 17.682 | 12.789 | 1.00 | 0.00 |
| H           |    |     |     |         |        |        |      |      |
| HETATM12334 | C2 | PRP | 865 | -9.431  | 18.346 | 10.756 | 1.00 | 0.00 |
| C           |    |     |     |         |        |        |      |      |
| HETATM12335 | H4 | PRP | 865 | -9.985  | 17.893 | 9.934  | 1.00 | 0.00 |
| H           |    |     |     |         |        |        |      |      |
| HETATM12336 | O2 | PRP | 865 | -8.015  | 18.154 | 10.440 | 1.00 | 0.00 |
| O           |    |     |     |         |        |        |      |      |
| HETATM12337 | H5 | PRP | 865 | -7.835  | 17.266 | 10.122 | 1.00 | 0.00 |
| H           |    |     |     |         |        |        |      |      |
| HETATM12338 | C3 | PRP | 865 | -9.788  | 19.792 | 10.982 | 1.00 | 0.00 |
| C           |    |     |     |         |        |        |      |      |
| HETATM12339 | H6 | PRP | 865 | -10.875 | 19.843 | 11.043 | 1.00 | 0.00 |
| H           |    |     |     |         |        |        |      |      |
| HETATM12340 | H7 | PRP | 865 | -9.317  | 20.080 | 11.922 | 1.00 | 0.00 |
| H           |    |     |     |         |        |        |      |      |
| HETATM12341 | H8 | PRP | 865 | -9.358  | 20.295 | 10.116 | 1.00 | 0.00 |
| H           |    |     |     |         |        |        |      |      |
| HETATM12342 | O1 | PRP | 866 | 7.566   | 16.163 | 30.364 | 1.00 | 0.00 |
| O           |    |     |     |         |        |        |      |      |
| HETATM12343 | H1 | PRP | 866 | 6.766   | 16.641 | 30.595 | 1.00 | 0.00 |
| H           |    |     |     |         |        |        |      |      |
| HETATM12344 | C1 | PRP | 866 | 7.017   | 14.998 | 29.822 | 1.00 | 0.00 |
| C           |    |     |     |         |        |        |      |      |
| HETATM12345 | H2 | PRP | 866 | 6.469   | 15.118 | 28.887 | 1.00 | 0.00 |
| H           |    |     |     |         |        |        |      |      |
| HETATM12346 | H3 | PRP | 866 | 7.777   | 14.252 | 29.591 | 1.00 | 0.00 |
| H           |    |     |     |         |        |        |      |      |
| HETATM12347 | C2 | PRP | 866 | 6.001   | 14.509 | 31.000 | 1.00 | 0.00 |
| C           |    |     |     |         |        |        |      |      |

|             |    |     |     |        |        |        |      |      |
|-------------|----|-----|-----|--------|--------|--------|------|------|
| HETATM12348 | H4 | PRP | 866 | 5.473  | 13.606 | 30.696 | 1.00 | 0.00 |
| H           |    |     |     |        |        |        |      |      |
| HETATM12349 | O2 | PRP | 866 | 5.068  | 15.543 | 31.160 | 1.00 | 0.00 |
| O           |    |     |     |        |        |        |      |      |
| HETATM12350 | H5 | PRP | 866 | 4.280  | 15.084 | 31.459 | 1.00 | 0.00 |
| H           |    |     |     |        |        |        |      |      |
| HETATM12351 | C3 | PRP | 866 | 6.734  | 14.188 | 32.257 | 1.00 | 0.00 |
| C           |    |     |     |        |        |        |      |      |
| HETATM12352 | H6 | PRP | 866 | 7.738  | 13.791 | 32.104 | 1.00 | 0.00 |
| H           |    |     |     |        |        |        |      |      |
| HETATM12353 | H7 | PRP | 866 | 6.611  | 15.032 | 32.935 | 1.00 | 0.00 |
| H           |    |     |     |        |        |        |      |      |
| HETATM12354 | H8 | PRP | 866 | 6.202  | 13.368 | 32.740 | 1.00 | 0.00 |
| H           |    |     |     |        |        |        |      |      |
| HETATM12355 | O1 | PRP | 867 | 3.488  | 13.197 | 20.819 | 1.00 | 0.00 |
| O           |    |     |     |        |        |        |      |      |
| HETATM12356 | H1 | PRP | 867 | 3.694  | 13.027 | 21.741 | 1.00 | 0.00 |
| H           |    |     |     |        |        |        |      |      |
| HETATM12357 | C1 | PRP | 867 | 2.124  | 13.619 | 20.843 | 1.00 | 0.00 |
| C           |    |     |     |        |        |        |      |      |
| HETATM12358 | H2 | PRP | 867 | 1.960  | 14.063 | 21.825 | 1.00 | 0.00 |
| H           |    |     |     |        |        |        |      |      |
| HETATM12359 | H3 | PRP | 867 | 1.911  | 14.432 | 20.149 | 1.00 | 0.00 |
| H           |    |     |     |        |        |        |      |      |
| HETATM12360 | C2 | PRP | 867 | 1.090  | 12.581 | 20.628 | 1.00 | 0.00 |
| C           |    |     |     |        |        |        |      |      |
| HETATM12361 | H4 | PRP | 867 | 0.162  | 13.138 | 20.497 | 1.00 | 0.00 |
| H           |    |     |     |        |        |        |      |      |
| HETATM12362 | O2 | PRP | 867 | 1.028  | 11.700 | 21.802 | 1.00 | 0.00 |
| O           |    |     |     |        |        |        |      |      |
| HETATM12363 | H5 | PRP | 867 | 0.538  | 10.882 | 21.691 | 1.00 | 0.00 |
| H           |    |     |     |        |        |        |      |      |
| HETATM12364 | C3 | PRP | 867 | 1.368  | 11.849 | 19.303 | 1.00 | 0.00 |
| C           |    |     |     |        |        |        |      |      |
| HETATM12365 | H6 | PRP | 867 | 2.428  | 11.595 | 19.300 | 1.00 | 0.00 |
| H           |    |     |     |        |        |        |      |      |
| HETATM12366 | H7 | PRP | 867 | 0.743  | 10.959 | 19.240 | 1.00 | 0.00 |
| H           |    |     |     |        |        |        |      |      |
| HETATM12367 | H8 | PRP | 867 | 1.208  | 12.496 | 18.440 | 1.00 | 0.00 |
| H           |    |     |     |        |        |        |      |      |
| HETATM12368 | O1 | PRP | 868 | -2.832 | 24.044 | 17.503 | 1.00 | 0.00 |
| O           |    |     |     |        |        |        |      |      |
| HETATM12369 | H1 | PRP | 868 | -2.909 | 24.799 | 18.092 | 1.00 | 0.00 |
| H           |    |     |     |        |        |        |      |      |
| HETATM12370 | C1 | PRP | 868 | -1.617 | 23.362 | 17.937 | 1.00 | 0.00 |
| C           |    |     |     |        |        |        |      |      |
| HETATM12371 | H2 | PRP | 868 | -0.793 | 23.979 | 17.578 | 1.00 | 0.00 |
| H           |    |     |     |        |        |        |      |      |
| HETATM12372 | H3 | PRP | 868 | -1.684 | 23.355 | 19.025 | 1.00 | 0.00 |
| H           |    |     |     |        |        |        |      |      |
| HETATM12373 | C2 | PRP | 868 | -1.472 | 21.993 | 17.399 | 1.00 | 0.00 |
| C           |    |     |     |        |        |        |      |      |
| HETATM12374 | H4 | PRP | 868 | -1.513 | 21.976 | 16.309 | 1.00 | 0.00 |
| H           |    |     |     |        |        |        |      |      |
| HETATM12375 | O2 | PRP | 868 | -2.506 | 21.225 | 18.050 | 1.00 | 0.00 |
| O           |    |     |     |        |        |        |      |      |

|             |    |     |     |         |        |        |      |      |
|-------------|----|-----|-----|---------|--------|--------|------|------|
| HETATM12376 | H5 | PRP | 868 | -3.351  | 21.538 | 17.719 | 1.00 | 0.00 |
| H           |    |     |     |         |        |        |      |      |
| HETATM12377 | C3 | PRP | 868 | -0.203  | 21.190 | 17.889 | 1.00 | 0.00 |
| C           |    |     |     |         |        |        |      |      |
| HETATM12378 | H6 | PRP | 868 | 0.099   | 21.606 | 18.850 | 1.00 | 0.00 |
| H           |    |     |     |         |        |        |      |      |
| HETATM12379 | H7 | PRP | 868 | -0.269  | 20.105 | 17.962 | 1.00 | 0.00 |
| H           |    |     |     |         |        |        |      |      |
| HETATM12380 | H8 | PRP | 868 | 0.613   | 21.400 | 17.197 | 1.00 | 0.00 |
| H           |    |     |     |         |        |        |      |      |
| HETATM12381 | O1 | PRP | 869 | -6.181  | 14.839 | 11.846 | 1.00 | 0.00 |
| O           |    |     |     |         |        |        |      |      |
| HETATM12382 | H1 | PRP | 869 | -6.747  | 14.935 | 12.615 | 1.00 | 0.00 |
| H           |    |     |     |         |        |        |      |      |
| HETATM12383 | C1 | PRP | 869 | -4.887  | 14.640 | 12.321 | 1.00 | 0.00 |
| C           |    |     |     |         |        |        |      |      |
| HETATM12384 | H2 | PRP | 869 | -4.597  | 15.342 | 13.102 | 1.00 | 0.00 |
| H           |    |     |     |         |        |        |      |      |
| HETATM12385 | H3 | PRP | 869 | -4.835  | 13.646 | 12.766 | 1.00 | 0.00 |
| H           |    |     |     |         |        |        |      |      |
| HETATM12386 | C2 | PRP | 869 | -3.827  | 14.600 | 11.250 | 1.00 | 0.00 |
| C           |    |     |     |         |        |        |      |      |
| HETATM12387 | H4 | PRP | 869 | -2.938  | 14.225 | 11.756 | 1.00 | 0.00 |
| H           |    |     |     |         |        |        |      |      |
| HETATM12388 | O2 | PRP | 869 | -3.439  | 15.866 | 10.959 | 1.00 | 0.00 |
| O           |    |     |     |         |        |        |      |      |
| HETATM12389 | H5 | PRP | 869 | -3.866  | 16.040 | 10.117 | 1.00 | 0.00 |
| H           |    |     |     |         |        |        |      |      |
| HETATM12390 | C3 | PRP | 869 | -4.110  | 13.661 | 10.119 | 1.00 | 0.00 |
| C           |    |     |     |         |        |        |      |      |
| HETATM12391 | H6 | PRP | 869 | -5.151  | 13.706 | 9.800  | 1.00 | 0.00 |
| H           |    |     |     |         |        |        |      |      |
| HETATM12392 | H7 | PRP | 869 | -3.449  | 13.954 | 9.303  | 1.00 | 0.00 |
| H           |    |     |     |         |        |        |      |      |
| HETATM12393 | H8 | PRP | 869 | -3.932  | 12.617 | 10.378 | 1.00 | 0.00 |
| H           |    |     |     |         |        |        |      |      |
| HETATM12394 | O1 | PRP | 870 | -10.063 | 22.180 | 13.875 | 1.00 | 0.00 |
| O           |    |     |     |         |        |        |      |      |
| HETATM12395 | H1 | PRP | 870 | -10.527 | 22.954 | 13.548 | 1.00 | 0.00 |
| H           |    |     |     |         |        |        |      |      |
| HETATM12396 | C1 | PRP | 870 | -10.815 | 21.920 | 15.099 | 1.00 | 0.00 |
| C           |    |     |     |         |        |        |      |      |
| HETATM12397 | H2 | PRP | 870 | -10.619 | 22.736 | 15.795 | 1.00 | 0.00 |
| H           |    |     |     |         |        |        |      |      |
| HETATM12398 | H3 | PRP | 870 | -11.861 | 22.004 | 14.804 | 1.00 | 0.00 |
| H           |    |     |     |         |        |        |      |      |
| HETATM12399 | C2 | PRP | 870 | -10.356 | 20.566 | 15.688 | 1.00 | 0.00 |
| C           |    |     |     |         |        |        |      |      |
| HETATM12400 | H4 | PRP | 870 | -9.331  | 20.656 | 16.046 | 1.00 | 0.00 |
| H           |    |     |     |         |        |        |      |      |
| HETATM12401 | O2 | PRP | 870 | -10.572 | 19.472 | 14.817 | 1.00 | 0.00 |
| O           |    |     |     |         |        |        |      |      |
| HETATM12402 | H5 | PRP | 870 | -10.681 | 19.745 | 13.903 | 1.00 | 0.00 |
| H           |    |     |     |         |        |        |      |      |
| HETATM12403 | C3 | PRP | 870 | -11.264 | 20.380 | 16.878 | 1.00 | 0.00 |
| C           |    |     |     |         |        |        |      |      |

|             |    |     |     |         |        |        |      |      |
|-------------|----|-----|-----|---------|--------|--------|------|------|
| HETATM12404 | H6 | PRP | 870 | -12.290 | 20.640 | 16.620 | 1.00 | 0.00 |
| H           |    |     |     |         |        |        |      |      |
| HETATM12405 | H7 | PRP | 870 | -11.168 | 19.354 | 17.232 | 1.00 | 0.00 |
| H           |    |     |     |         |        |        |      |      |
| HETATM12406 | H8 | PRP | 870 | -10.888 | 21.074 | 17.630 | 1.00 | 0.00 |
| H           |    |     |     |         |        |        |      |      |
| HETATM12407 | O1 | PRP | 871 | 0.573   | 14.505 | 16.076 | 1.00 | 0.00 |
| O           |    |     |     |         |        |        |      |      |
| HETATM12408 | H1 | PRP | 871 | -0.012  | 13.746 | 16.036 | 1.00 | 0.00 |
| H           |    |     |     |         |        |        |      |      |
| HETATM12409 | C1 | PRP | 871 | 1.636   | 14.314 | 15.106 | 1.00 | 0.00 |
| C           |    |     |     |         |        |        |      |      |
| HETATM12410 | H2 | PRP | 871 | 2.610   | 14.471 | 15.570 | 1.00 | 0.00 |
| H           |    |     |     |         |        |        |      |      |
| HETATM12411 | H3 | PRP | 871 | 1.637   | 13.290 | 14.733 | 1.00 | 0.00 |
| H           |    |     |     |         |        |        |      |      |
| HETATM12412 | C2 | PRP | 871 | 1.398   | 15.088 | 13.765 | 1.00 | 0.00 |
| C           |    |     |     |         |        |        |      |      |
| HETATM12413 | H4 | PRP | 871 | 2.227   | 15.001 | 13.063 | 1.00 | 0.00 |
| H           |    |     |     |         |        |        |      |      |
| HETATM12414 | O2 | PRP | 871 | 1.160   | 16.457 | 14.032 | 1.00 | 0.00 |
| O           |    |     |     |         |        |        |      |      |
| HETATM12415 | H5 | PRP | 871 | 0.473   | 16.574 | 14.692 | 1.00 | 0.00 |
| H           |    |     |     |         |        |        |      |      |
| HETATM12416 | C3 | PRP | 871 | 0.116   | 14.615 | 12.987 | 1.00 | 0.00 |
| C           |    |     |     |         |        |        |      |      |
| HETATM12417 | H6 | PRP | 871 | 0.009   | 13.550 | 12.781 | 1.00 | 0.00 |
| H           |    |     |     |         |        |        |      |      |
| HETATM12418 | H7 | PRP | 871 | -0.728  | 14.992 | 13.564 | 1.00 | 0.00 |
| H           |    |     |     |         |        |        |      |      |
| HETATM12419 | H8 | PRP | 871 | 0.081   | 15.014 | 11.973 | 1.00 | 0.00 |
| H           |    |     |     |         |        |        |      |      |
| HETATM12420 | O1 | PRP | 872 | -8.408  | 14.321 | 31.050 | 1.00 | 0.00 |
| O           |    |     |     |         |        |        |      |      |
| HETATM12421 | H1 | PRP | 872 | -7.892  | 14.888 | 31.628 | 1.00 | 0.00 |
| H           |    |     |     |         |        |        |      |      |
| HETATM12422 | C1 | PRP | 872 | -8.632  | 14.971 | 29.766 | 1.00 | 0.00 |
| C           |    |     |     |         |        |        |      |      |
| HETATM12423 | H2 | PRP | 872 | -7.667  | 15.049 | 29.264 | 1.00 | 0.00 |
| H           |    |     |     |         |        |        |      |      |
| HETATM12424 | H3 | PRP | 872 | -9.376  | 14.348 | 29.271 | 1.00 | 0.00 |
| H           |    |     |     |         |        |        |      |      |
| HETATM12425 | C2 | PRP | 872 | -9.300  | 16.320 | 30.163 | 1.00 | 0.00 |
| C           |    |     |     |         |        |        |      |      |
| HETATM12426 | H4 | PRP | 872 | -8.702  | 16.775 | 30.954 | 1.00 | 0.00 |
| H           |    |     |     |         |        |        |      |      |
| HETATM12427 | O2 | PRP | 872 | -10.526 | 16.199 | 30.764 | 1.00 | 0.00 |
| O           |    |     |     |         |        |        |      |      |
| HETATM12428 | H5 | PRP | 872 | -11.087 | 15.738 | 30.136 | 1.00 | 0.00 |
| H           |    |     |     |         |        |        |      |      |
| HETATM12429 | C3 | PRP | 872 | -9.367  | 17.317 | 29.071 | 1.00 | 0.00 |
| C           |    |     |     |         |        |        |      |      |
| HETATM12430 | H6 | PRP | 872 | -8.366  | 17.610 | 28.753 | 1.00 | 0.00 |
| H           |    |     |     |         |        |        |      |      |
| HETATM12431 | H7 | PRP | 872 | -9.870  | 16.971 | 28.168 | 1.00 | 0.00 |
| H           |    |     |     |         |        |        |      |      |

|             |    |     |     |         |        |        |      |      |
|-------------|----|-----|-----|---------|--------|--------|------|------|
| HETATM12432 | H8 | PRP | 872 | -9.882  | 18.234 | 29.355 | 1.00 | 0.00 |
| H           |    |     |     |         |        |        |      |      |
| HETATM12433 | O1 | PRP | 873 | -5.793  | 17.899 | 14.117 | 1.00 | 0.00 |
| O           |    |     |     |         |        |        |      |      |
| HETATM12434 | H1 | PRP | 873 | -6.711  | 18.081 | 14.329 | 1.00 | 0.00 |
| H           |    |     |     |         |        |        |      |      |
| HETATM12435 | C1 | PRP | 873 | -5.464  | 18.126 | 12.747 | 1.00 | 0.00 |
| C           |    |     |     |         |        |        |      |      |
| HETATM12436 | H2 | PRP | 873 | -4.448  | 17.739 | 12.667 | 1.00 | 0.00 |
| H           |    |     |     |         |        |        |      |      |
| HETATM12437 | H3 | PRP | 873 | -6.114  | 17.591 | 12.055 | 1.00 | 0.00 |
| H           |    |     |     |         |        |        |      |      |
| HETATM12438 | C2 | PRP | 873 | -5.362  | 19.571 | 12.265 | 1.00 | 0.00 |
| C           |    |     |     |         |        |        |      |      |
| HETATM12439 | H4 | PRP | 873 | -4.845  | 20.146 | 13.032 | 1.00 | 0.00 |
| H           |    |     |     |         |        |        |      |      |
| HETATM12440 | O2 | PRP | 873 | -6.672  | 20.067 | 12.185 | 1.00 | 0.00 |
| O           |    |     |     |         |        |        |      |      |
| HETATM12441 | H5 | PRP | 873 | -7.142  | 19.584 | 11.501 | 1.00 | 0.00 |
| H           |    |     |     |         |        |        |      |      |
| HETATM12442 | C3 | PRP | 873 | -4.704  | 19.575 | 10.946 | 1.00 | 0.00 |
| C           |    |     |     |         |        |        |      |      |
| HETATM12443 | H6 | PRP | 873 | -4.409  | 20.584 | 10.661 | 1.00 | 0.00 |
| H           |    |     |     |         |        |        |      |      |
| HETATM12444 | H7 | PRP | 873 | -3.771  | 19.012 | 10.994 | 1.00 | 0.00 |
| H           |    |     |     |         |        |        |      |      |
| HETATM12445 | H8 | PRP | 873 | -5.405  | 19.127 | 10.242 | 1.00 | 0.00 |
| H           |    |     |     |         |        |        |      |      |
| HETATM12446 | O1 | PRP | 874 | -9.112  | 11.928 | 27.886 | 1.00 | 0.00 |
| O           |    |     |     |         |        |        |      |      |
| HETATM12447 | H1 | PRP | 874 | -9.206  | 11.659 | 26.970 | 1.00 | 0.00 |
| H           |    |     |     |         |        |        |      |      |
| HETATM12448 | C1 | PRP | 874 | -7.746  | 11.730 | 28.285 | 1.00 | 0.00 |
| C           |    |     |     |         |        |        |      |      |
| HETATM12449 | H2 | PRP | 874 | -7.726  | 11.887 | 29.363 | 1.00 | 0.00 |
| H           |    |     |     |         |        |        |      |      |
| HETATM12450 | H3 | PRP | 874 | -7.265  | 10.767 | 28.113 | 1.00 | 0.00 |
| H           |    |     |     |         |        |        |      |      |
| HETATM12451 | C2 | PRP | 874 | -6.888  | 12.895 | 27.626 | 1.00 | 0.00 |
| C           |    |     |     |         |        |        |      |      |
| HETATM12452 | H4 | PRP | 874 | -7.276  | 13.913 | 27.611 | 1.00 | 0.00 |
| H           |    |     |     |         |        |        |      |      |
| HETATM12453 | O2 | PRP | 874 | -6.446  | 12.531 | 26.385 | 1.00 | 0.00 |
| O           |    |     |     |         |        |        |      |      |
| HETATM12454 | H5 | PRP | 874 | -7.036  | 11.988 | 25.857 | 1.00 | 0.00 |
| H           |    |     |     |         |        |        |      |      |
| HETATM12455 | C3 | PRP | 874 | -5.562  | 12.890 | 28.334 | 1.00 | 0.00 |
| C           |    |     |     |         |        |        |      |      |
| HETATM12456 | H6 | PRP | 874 | -4.864  | 13.485 | 27.746 | 1.00 | 0.00 |
| H           |    |     |     |         |        |        |      |      |
| HETATM12457 | H7 | PRP | 874 | -5.717  | 13.372 | 29.299 | 1.00 | 0.00 |
| H           |    |     |     |         |        |        |      |      |
| HETATM12458 | H8 | PRP | 874 | -5.124  | 11.904 | 28.491 | 1.00 | 0.00 |
| H           |    |     |     |         |        |        |      |      |
| HETATM12459 | O1 | PRP | 875 | -13.140 | 4.823  | 37.930 | 1.00 | 0.00 |
| O           |    |     |     |         |        |        |      |      |



|             |    |     |     |         |        |        |      |      |
|-------------|----|-----|-----|---------|--------|--------|------|------|
| HETATM12460 | H1 | PRP | 875 | -13.212 | 4.807  | 36.973 | 1.00 | 0.00 |
| H           |    |     |     |         |        |        |      |      |
| HETATM12461 | C1 | PRP | 875 | -12.692 | 6.197  | 38.163 | 1.00 | 0.00 |
| C           |    |     |     |         |        |        |      |      |
| HETATM12462 | H2 | PRP | 875 | -12.766 | 6.326  | 39.243 | 1.00 | 0.00 |
| H           |    |     |     |         |        |        |      |      |
| HETATM12463 | H3 | PRP | 875 | -11.701 | 6.262  | 37.713 | 1.00 | 0.00 |
| H           |    |     |     |         |        |        |      |      |
| HETATM12464 | C2 | PRP | 875 | -13.603 | 7.275  | 37.500 | 1.00 | 0.00 |
| C           |    |     |     |         |        |        |      |      |
| HETATM12465 | H4 | PRP | 875 | -13.313 | 8.252  | 37.886 | 1.00 | 0.00 |
| H           |    |     |     |         |        |        |      |      |
| HETATM12466 | O2 | PRP | 875 | -14.981 | 7.146  | 37.763 | 1.00 | 0.00 |
| O           |    |     |     |         |        |        |      |      |
| HETATM12467 | H5 | PRP | 875 | -15.484 | 7.946  | 37.588 | 1.00 | 0.00 |
| H           |    |     |     |         |        |        |      |      |
| HETATM12468 | C3 | PRP | 875 | -13.458 | 7.069  | 36.019 | 1.00 | 0.00 |
| C           |    |     |     |         |        |        |      |      |
| HETATM12469 | H6 | PRP | 875 | -14.110 | 6.261  | 35.685 | 1.00 | 0.00 |
| H           |    |     |     |         |        |        |      |      |
| HETATM12470 | H7 | PRP | 875 | -13.869 | 7.889  | 35.431 | 1.00 | 0.00 |
| H           |    |     |     |         |        |        |      |      |
| HETATM12471 | H8 | PRP | 875 | -12.445 | 6.894  | 35.656 | 1.00 | 0.00 |
| H           |    |     |     |         |        |        |      |      |
| HETATM12472 | O1 | PRP | 876 | -5.804  | 20.277 | 5.640  | 1.00 | 0.00 |
| O           |    |     |     |         |        |        |      |      |
| HETATM12473 | H1 | PRP | 876 | -5.825  | 19.440 | 5.170  | 1.00 | 0.00 |
| H           |    |     |     |         |        |        |      |      |
| HETATM12474 | C1 | PRP | 876 | -6.066  | 19.963 | 6.993  | 1.00 | 0.00 |
| C           |    |     |     |         |        |        |      |      |
| HETATM12475 | H2 | PRP | 876 | -5.140  | 19.903 | 7.565  | 1.00 | 0.00 |
| H           |    |     |     |         |        |        |      |      |
| HETATM12476 | H3 | PRP | 876 | -6.710  | 20.705 | 7.464  | 1.00 | 0.00 |
| H           |    |     |     |         |        |        |      |      |
| HETATM12477 | C2 | PRP | 876 | -6.918  | 18.701 | 7.041  | 1.00 | 0.00 |
| C           |    |     |     |         |        |        |      |      |
| HETATM12478 | H4 | PRP | 876 | -6.738  | 18.287 | 8.033  | 1.00 | 0.00 |
| H           |    |     |     |         |        |        |      |      |
| HETATM12479 | O2 | PRP | 876 | -6.496  | 17.710 | 6.147  | 1.00 | 0.00 |
| O           |    |     |     |         |        |        |      |      |
| HETATM12480 | H5 | PRP | 876 | -7.119  | 17.010 | 6.355  | 1.00 | 0.00 |
| H           |    |     |     |         |        |        |      |      |
| HETATM12481 | C3 | PRP | 876 | -8.419  | 18.912 | 6.912  | 1.00 | 0.00 |
| C           |    |     |     |         |        |        |      |      |
| HETATM12482 | H6 | PRP | 876 | -8.910  | 17.993 | 6.592  | 1.00 | 0.00 |
| H           |    |     |     |         |        |        |      |      |
| HETATM12483 | H7 | PRP | 876 | -8.892  | 19.197 | 7.852  | 1.00 | 0.00 |
| H           |    |     |     |         |        |        |      |      |
| HETATM12484 | H8 | PRP | 876 | -8.674  | 19.603 | 6.109  | 1.00 | 0.00 |
| H           |    |     |     |         |        |        |      |      |
| HETATM12485 | O1 | PRP | 877 | 8.332   | 38.072 | 5.421  | 1.00 | 0.00 |
| O           |    |     |     |         |        |        |      |      |
| HETATM12486 | H1 | PRP | 877 | 7.436   | 38.304 | 5.678  | 1.00 | 0.00 |
| H           |    |     |     |         |        |        |      |      |
| HETATM12487 | C1 | PRP | 877 | 8.367   | 37.661 | 4.047  | 1.00 | 0.00 |
| C           |    |     |     |         |        |        |      |      |

|             |    |     |     |        |        |        |      |      |
|-------------|----|-----|-----|--------|--------|--------|------|------|
| HETATM12488 | H2 | PRP | 877 | 7.548  | 37.022 | 3.715  | 1.00 | 0.00 |
| H           |    |     |     |        |        |        |      |      |
| HETATM12489 | H3 | PRP | 877 | 8.288  | 38.604 | 3.506  | 1.00 | 0.00 |
| H           |    |     |     |        |        |        |      |      |
| HETATM12490 | C2 | PRP | 877 | 9.768  | 37.122 | 3.570  | 1.00 | 0.00 |
| C           |    |     |     |        |        |        |      |      |
| HETATM12491 | H4 | PRP | 877 | 10.064 | 36.143 | 3.949  | 1.00 | 0.00 |
| H           |    |     |     |        |        |        |      |      |
| HETATM12492 | O2 | PRP | 877 | 10.765 | 37.996 | 4.089  | 1.00 | 0.00 |
| O           |    |     |     |        |        |        |      |      |
| HETATM12493 | H5 | PRP | 877 | 10.398 | 38.411 | 4.873  | 1.00 | 0.00 |
| H           |    |     |     |        |        |        |      |      |
| HETATM12494 | C3 | PRP | 877 | 9.680  | 37.011 | 2.077  | 1.00 | 0.00 |
| C           |    |     |     |        |        |        |      |      |
| HETATM12495 | H6 | PRP | 877 | 9.002  | 36.211 | 1.780  | 1.00 | 0.00 |
| H           |    |     |     |        |        |        |      |      |
| HETATM12496 | H7 | PRP | 877 | 9.466  | 37.937 | 1.544  | 1.00 | 0.00 |
| H           |    |     |     |        |        |        |      |      |
| HETATM12497 | H8 | PRP | 877 | 10.594 | 36.587 | 1.661  | 1.00 | 0.00 |
| H           |    |     |     |        |        |        |      |      |
| HETATM12498 | O1 | PRP | 878 | -8.130 | 13.575 | 22.380 | 1.00 | 0.00 |
| O           |    |     |     |        |        |        |      |      |
| HETATM12499 | H1 | PRP | 878 | -8.902 | 13.055 | 22.144 | 1.00 | 0.00 |
| H           |    |     |     |        |        |        |      |      |
| HETATM12500 | C1 | PRP | 878 | -6.875 | 13.055 | 21.921 | 1.00 | 0.00 |
| C           |    |     |     |        |        |        |      |      |
| HETATM12501 | H2 | PRP | 878 | -6.165 | 13.264 | 22.721 | 1.00 | 0.00 |
| H           |    |     |     |        |        |        |      |      |
| HETATM12502 | H3 | PRP | 878 | -7.029 | 11.976 | 21.941 | 1.00 | 0.00 |
| H           |    |     |     |        |        |        |      |      |
| HETATM12503 | C2 | PRP | 878 | -6.462 | 13.417 | 20.495 | 1.00 | 0.00 |
| C           |    |     |     |        |        |        |      |      |
| HETATM12504 | H4 | PRP | 878 | -5.559 | 12.973 | 20.076 | 1.00 | 0.00 |
| H           |    |     |     |        |        |        |      |      |
| HETATM12505 | O2 | PRP | 878 | -6.355 | 14.761 | 20.472 | 1.00 | 0.00 |
| O           |    |     |     |        |        |        |      |      |
| HETATM12506 | H5 | PRP | 878 | -7.229 | 15.148 | 20.565 | 1.00 | 0.00 |
| H           |    |     |     |        |        |        |      |      |
| HETATM12507 | C3 | PRP | 878 | -7.570 | 13.036 | 19.533 | 1.00 | 0.00 |
| C           |    |     |     |        |        |        |      |      |
| HETATM12508 | H6 | PRP | 878 | -7.704 | 11.955 | 19.500 | 1.00 | 0.00 |
| H           |    |     |     |        |        |        |      |      |
| HETATM12509 | H7 | PRP | 878 | -8.460 | 13.628 | 19.746 | 1.00 | 0.00 |
| H           |    |     |     |        |        |        |      |      |
| HETATM12510 | H8 | PRP | 878 | -7.171 | 13.344 | 18.566 | 1.00 | 0.00 |
| H           |    |     |     |        |        |        |      |      |
| HETATM12511 | O1 | PRP | 879 | -4.372 | 29.724 | 21.618 | 1.00 | 0.00 |
| O           |    |     |     |        |        |        |      |      |
| HETATM12512 | H1 | PRP | 879 | -4.774 | 30.110 | 22.400 | 1.00 | 0.00 |
| H           |    |     |     |        |        |        |      |      |
| HETATM12513 | C1 | PRP | 879 | -3.004 | 29.993 | 21.584 | 1.00 | 0.00 |
| C           |    |     |     |        |        |        |      |      |
| HETATM12514 | H2 | PRP | 879 | -2.415 | 29.092 | 21.759 | 1.00 | 0.00 |
| H           |    |     |     |        |        |        |      |      |
| HETATM12515 | H3 | PRP | 879 | -2.746 | 30.357 | 20.590 | 1.00 | 0.00 |
| H           |    |     |     |        |        |        |      |      |

|             |    |     |     |        |        |        |      |      |
|-------------|----|-----|-----|--------|--------|--------|------|------|
| HETATM12516 | C2 | PRP | 879 | -2.570 | 31.089 | 22.633 | 1.00 | 0.00 |
| C           |    |     |     |        |        |        |      |      |
| HETATM12517 | H4 | PRP | 879 | -2.467 | 30.707 | 23.649 | 1.00 | 0.00 |
| H           |    |     |     |        |        |        |      |      |
| HETATM12518 | O2 | PRP | 879 | -3.571 | 32.134 | 22.592 | 1.00 | 0.00 |
| O           |    |     |     |        |        |        |      |      |
| HETATM12519 | H5 | PRP | 879 | -3.697 | 32.311 | 21.657 | 1.00 | 0.00 |
| H           |    |     |     |        |        |        |      |      |
| HETATM12520 | C3 | PRP | 879 | -1.180 | 31.626 | 22.191 | 1.00 | 0.00 |
| C           |    |     |     |        |        |        |      |      |
| HETATM12521 | H6 | PRP | 879 | -0.409 | 30.864 | 22.078 | 1.00 | 0.00 |
| H           |    |     |     |        |        |        |      |      |
| HETATM12522 | H7 | PRP | 879 | -1.256 | 32.292 | 21.332 | 1.00 | 0.00 |
| H           |    |     |     |        |        |        |      |      |
| HETATM12523 | H8 | PRP | 879 | -0.757 | 32.245 | 22.983 | 1.00 | 0.00 |
| H           |    |     |     |        |        |        |      |      |
| HETATM12524 | O1 | PRP | 880 | 3.873  | 36.079 | 25.114 | 1.00 | 0.00 |
| O           |    |     |     |        |        |        |      |      |
| HETATM12525 | H1 | PRP | 880 | 4.736  | 36.462 | 24.939 | 1.00 | 0.00 |
| H           |    |     |     |        |        |        |      |      |
| HETATM12526 | C1 | PRP | 880 | 3.461  | 36.491 | 26.364 | 1.00 | 0.00 |
| C           |    |     |     |        |        |        |      |      |
| HETATM12527 | H2 | PRP | 880 | 3.806  | 37.469 | 26.701 | 1.00 | 0.00 |
| H           |    |     |     |        |        |        |      |      |
| HETATM12528 | H3 | PRP | 880 | 2.385  | 36.555 | 26.201 | 1.00 | 0.00 |
| H           |    |     |     |        |        |        |      |      |
| HETATM12529 | C2 | PRP | 880 | 3.636  | 35.434 | 27.443 | 1.00 | 0.00 |
| C           |    |     |     |        |        |        |      |      |
| HETATM12530 | H4 | PRP | 880 | 4.605  | 34.935 | 27.427 | 1.00 | 0.00 |
| H           |    |     |     |        |        |        |      |      |
| HETATM12531 | O2 | PRP | 880 | 2.770  | 34.340 | 27.143 | 1.00 | 0.00 |
| O           |    |     |     |        |        |        |      |      |
| HETATM12532 | H5 | PRP | 880 | 1.925  | 34.796 | 27.106 | 1.00 | 0.00 |
| H           |    |     |     |        |        |        |      |      |
| HETATM12533 | C3 | PRP | 880 | 3.178  | 36.037 | 28.759 | 1.00 | 0.00 |
| C           |    |     |     |        |        |        |      |      |
| HETATM12534 | H6 | PRP | 880 | 4.051  | 36.614 | 29.064 | 1.00 | 0.00 |
| H           |    |     |     |        |        |        |      |      |
| HETATM12535 | H7 | PRP | 880 | 2.339  | 36.724 | 28.649 | 1.00 | 0.00 |
| H           |    |     |     |        |        |        |      |      |
| HETATM12536 | H8 | PRP | 880 | 3.053  | 35.262 | 29.516 | 1.00 | 0.00 |
| H           |    |     |     |        |        |        |      |      |
| HETATM12537 | O1 | PRP | 881 | -2.676 | 30.479 | 30.192 | 1.00 | 0.00 |
| O           |    |     |     |        |        |        |      |      |
| HETATM12538 | H1 | PRP | 881 | -3.056 | 29.860 | 29.565 | 1.00 | 0.00 |
| H           |    |     |     |        |        |        |      |      |
| HETATM12539 | C1 | PRP | 881 | -3.082 | 29.987 | 31.497 | 1.00 | 0.00 |
| C           |    |     |     |        |        |        |      |      |
| HETATM12540 | H2 | PRP | 881 | -4.027 | 29.444 | 31.547 | 1.00 | 0.00 |
| H           |    |     |     |        |        |        |      |      |
| HETATM12541 | H3 | PRP | 881 | -2.419 | 29.155 | 31.735 | 1.00 | 0.00 |
| H           |    |     |     |        |        |        |      |      |
| HETATM12542 | C2 | PRP | 881 | -3.007 | 31.096 | 32.602 | 1.00 | 0.00 |
| C           |    |     |     |        |        |        |      |      |
| HETATM12543 | H4 | PRP | 881 | -3.450 | 32.008 | 32.202 | 1.00 | 0.00 |
| H           |    |     |     |        |        |        |      |      |

|             |    |     |     |        |        |        |      |      |
|-------------|----|-----|-----|--------|--------|--------|------|------|
| HETATM12544 | O2 | PRP | 881 | -1.749 | 31.231 | 33.155 | 1.00 | 0.00 |
| O           |    |     |     |        |        |        |      |      |
| HETATM12545 | H5 | PRP | 881 | -1.116 | 31.109 | 32.443 | 1.00 | 0.00 |
| H           |    |     |     |        |        |        |      |      |
| HETATM12546 | C3 | PRP | 881 | -4.084 | 30.815 | 33.743 | 1.00 | 0.00 |
| C           |    |     |     |        |        |        |      |      |
| HETATM12547 | H6 | PRP | 881 | -5.103 | 30.808 | 33.354 | 1.00 | 0.00 |
| H           |    |     |     |        |        |        |      |      |
| HETATM12548 | H7 | PRP | 881 | -3.913 | 29.907 | 34.322 | 1.00 | 0.00 |
| H           |    |     |     |        |        |        |      |      |
| HETATM12549 | H8 | PRP | 881 | -4.004 | 31.609 | 34.486 | 1.00 | 0.00 |
| H           |    |     |     |        |        |        |      |      |
| HETATM12550 | O1 | PRP | 882 | 8.325  | 39.150 | 33.553 | 1.00 | 0.00 |
| O           |    |     |     |        |        |        |      |      |
| HETATM12551 | H1 | PRP | 882 | 8.082  | 39.840 | 34.175 | 1.00 | 0.00 |
| H           |    |     |     |        |        |        |      |      |
| HETATM12552 | C1 | PRP | 882 | 8.649  | 37.939 | 34.200 | 1.00 | 0.00 |
| C           |    |     |     |        |        |        |      |      |
| HETATM12553 | H2 | PRP | 882 | 8.714  | 37.088 | 33.522 | 1.00 | 0.00 |
| H           |    |     |     |        |        |        |      |      |
| HETATM12554 | H3 | PRP | 882 | 9.629  | 38.090 | 34.653 | 1.00 | 0.00 |
| H           |    |     |     |        |        |        |      |      |
| HETATM12555 | C2 | PRP | 882 | 7.626  | 37.646 | 35.331 | 1.00 | 0.00 |
| C           |    |     |     |        |        |        |      |      |
| HETATM12556 | H4 | PRP | 882 | 6.605  | 37.565 | 34.959 | 1.00 | 0.00 |
| H           |    |     |     |        |        |        |      |      |
| HETATM12557 | O2 | PRP | 882 | 7.709  | 38.546 | 36.444 | 1.00 | 0.00 |
| O           |    |     |     |        |        |        |      |      |
| HETATM12558 | H5 | PRP | 882 | 8.632  | 38.802 | 36.509 | 1.00 | 0.00 |
| H           |    |     |     |        |        |        |      |      |
| HETATM12559 | C3 | PRP | 882 | 7.875  | 36.253 | 35.997 | 1.00 | 0.00 |
| C           |    |     |     |        |        |        |      |      |
| HETATM12560 | H6 | PRP | 882 | 7.873  | 35.427 | 35.285 | 1.00 | 0.00 |
| H           |    |     |     |        |        |        |      |      |
| HETATM12561 | H7 | PRP | 882 | 8.779  | 36.382 | 36.592 | 1.00 | 0.00 |
| H           |    |     |     |        |        |        |      |      |
| HETATM12562 | H8 | PRP | 882 | 7.100  | 36.013 | 36.725 | 1.00 | 0.00 |
| H           |    |     |     |        |        |        |      |      |
| HETATM12563 | O1 | PRP | 883 | 5.718  | 42.532 | 28.458 | 1.00 | 0.00 |
| O           |    |     |     |        |        |        |      |      |
| HETATM12564 | H1 | PRP | 883 | 6.548  | 42.916 | 28.166 | 1.00 | 0.00 |
| H           |    |     |     |        |        |        |      |      |
| HETATM12565 | C1 | PRP | 883 | 5.715  | 42.739 | 29.812 | 1.00 | 0.00 |
| C           |    |     |     |        |        |        |      |      |
| HETATM12566 | H2 | PRP | 883 | 4.773  | 42.489 | 30.300 | 1.00 | 0.00 |
| H           |    |     |     |        |        |        |      |      |
| HETATM12567 | H3 | PRP | 883 | 6.531  | 42.189 | 30.280 | 1.00 | 0.00 |
| H           |    |     |     |        |        |        |      |      |
| HETATM12568 | C2 | PRP | 883 | 6.143  | 44.222 | 30.001 | 1.00 | 0.00 |
| C           |    |     |     |        |        |        |      |      |
| HETATM12569 | H4 | PRP | 883 | 5.448  | 44.825 | 29.417 | 1.00 | 0.00 |
| H           |    |     |     |        |        |        |      |      |
| HETATM12570 | O2 | PRP | 883 | 7.408  | 44.519 | 29.451 | 1.00 | 0.00 |
| O           |    |     |     |        |        |        |      |      |
| HETATM12571 | H5 | PRP | 883 | 7.946  | 45.011 | 30.075 | 1.00 | 0.00 |
| H           |    |     |     |        |        |        |      |      |

|             |    |     |     |        |        |        |      |      |
|-------------|----|-----|-----|--------|--------|--------|------|------|
| HETATM12572 | C3 | PRP | 883 | 6.227  | 44.528 | 31.515 | 1.00 | 0.00 |
| C           |    |     |     |        |        |        |      |      |
| HETATM12573 | H6 | PRP | 883 | 6.167  | 45.599 | 31.711 | 1.00 | 0.00 |
| H           |    |     |     |        |        |        |      |      |
| HETATM12574 | H7 | PRP | 883 | 5.300  | 44.090 | 31.887 | 1.00 | 0.00 |
| H           |    |     |     |        |        |        |      |      |
| HETATM12575 | H8 | PRP | 883 | 7.028  | 44.077 | 32.100 | 1.00 | 0.00 |
| H           |    |     |     |        |        |        |      |      |
| HETATM12576 | O1 | PRP | 884 | 6.535  | 48.317 | 13.676 | 1.00 | 0.00 |
| O           |    |     |     |        |        |        |      |      |
| HETATM12577 | H1 | PRP | 884 | 5.621  | 48.526 | 13.883 | 1.00 | 0.00 |
| H           |    |     |     |        |        |        |      |      |
| HETATM12578 | C1 | PRP | 884 | 7.213  | 47.862 | 14.882 | 1.00 | 0.00 |
| C           |    |     |     |        |        |        |      |      |
| HETATM12579 | H2 | PRP | 884 | 7.246  | 48.711 | 15.566 | 1.00 | 0.00 |
| H           |    |     |     |        |        |        |      |      |
| HETATM12580 | H3 | PRP | 884 | 6.619  | 47.041 | 15.284 | 1.00 | 0.00 |
| H           |    |     |     |        |        |        |      |      |
| HETATM12581 | C2 | PRP | 884 | 8.667  | 47.390 | 14.653 | 1.00 | 0.00 |
| C           |    |     |     |        |        |        |      |      |
| HETATM12582 | H4 | PRP | 884 | 9.103  | 48.045 | 13.899 | 1.00 | 0.00 |
| H           |    |     |     |        |        |        |      |      |
| HETATM12583 | O2 | PRP | 884 | 8.629  | 46.033 | 14.179 | 1.00 | 0.00 |
| O           |    |     |     |        |        |        |      |      |
| HETATM12584 | H5 | PRP | 884 | 8.015  | 46.023 | 13.441 | 1.00 | 0.00 |
| H           |    |     |     |        |        |        |      |      |
| HETATM12585 | C3 | PRP | 884 | 9.428  | 47.381 | 15.985 | 1.00 | 0.00 |
| C           |    |     |     |        |        |        |      |      |
| HETATM12586 | H6 | PRP | 884 | 9.005  | 46.650 | 16.674 | 1.00 | 0.00 |
| H           |    |     |     |        |        |        |      |      |
| HETATM12587 | H7 | PRP | 884 | 10.495 | 47.209 | 15.844 | 1.00 | 0.00 |
| H           |    |     |     |        |        |        |      |      |
| HETATM12588 | H8 | PRP | 884 | 9.474  | 48.334 | 16.513 | 1.00 | 0.00 |
| H           |    |     |     |        |        |        |      |      |
| HETATM12589 | O1 | PRP | 885 | -5.682 | 25.999 | 24.117 | 1.00 | 0.00 |
| O           |    |     |     |        |        |        |      |      |
| HETATM12590 | H1 | PRP | 885 | -6.363 | 25.417 | 24.460 | 1.00 | 0.00 |
| H           |    |     |     |        |        |        |      |      |
| HETATM12591 | C1 | PRP | 885 | -5.038 | 25.329 | 23.095 | 1.00 | 0.00 |
| C           |    |     |     |        |        |        |      |      |
| HETATM12592 | H2 | PRP | 885 | -4.508 | 24.472 | 23.512 | 1.00 | 0.00 |
| H           |    |     |     |        |        |        |      |      |
| HETATM12593 | H3 | PRP | 885 | -5.741 | 24.825 | 22.431 | 1.00 | 0.00 |
| H           |    |     |     |        |        |        |      |      |
| HETATM12594 | C2 | PRP | 885 | -4.188 | 26.269 | 22.286 | 1.00 | 0.00 |
| C           |    |     |     |        |        |        |      |      |
| HETATM12595 | H4 | PRP | 885 | -3.562 | 26.897 | 22.920 | 1.00 | 0.00 |
| H           |    |     |     |        |        |        |      |      |
| HETATM12596 | O2 | PRP | 885 | -5.023 | 27.097 | 21.496 | 1.00 | 0.00 |
| O           |    |     |     |        |        |        |      |      |
| HETATM12597 | H5 | PRP | 885 | -4.527 | 27.914 | 21.401 | 1.00 | 0.00 |
| H           |    |     |     |        |        |        |      |      |
| HETATM12598 | C3 | PRP | 885 | -3.294 | 25.464 | 21.248 | 1.00 | 0.00 |
| C           |    |     |     |        |        |        |      |      |
| HETATM12599 | H6 | PRP | 885 | -2.466 | 25.035 | 21.813 | 1.00 | 0.00 |
| H           |    |     |     |        |        |        |      |      |

|             |    |     |     |        |        |        |      |      |
|-------------|----|-----|-----|--------|--------|--------|------|------|
| HETATM12600 | H7 | PRP | 885 | -3.849 | 24.681 | 20.732 | 1.00 | 0.00 |
| H           |    |     |     |        |        |        |      |      |
| HETATM12601 | H8 | PRP | 885 | -2.892 | 26.144 | 20.497 | 1.00 | 0.00 |
| H           |    |     |     |        |        |        |      |      |
| HETATM12602 | O1 | PRP | 886 | 5.242  | 21.089 | 27.047 | 1.00 | 0.00 |
| O           |    |     |     |        |        |        |      |      |
| HETATM12603 | H1 | PRP | 886 | 4.907  | 20.217 | 26.826 | 1.00 | 0.00 |
| H           |    |     |     |        |        |        |      |      |
| HETATM12604 | C1 | PRP | 886 | 4.320  | 21.609 | 27.927 | 1.00 | 0.00 |
| C           |    |     |     |        |        |        |      |      |
| HETATM12605 | H2 | PRP | 886 | 3.836  | 20.837 | 28.525 | 1.00 | 0.00 |
| H           |    |     |     |        |        |        |      |      |
| HETATM12606 | H3 | PRP | 886 | 4.662  | 22.354 | 28.645 | 1.00 | 0.00 |
| H           |    |     |     |        |        |        |      |      |
| HETATM12607 | C2 | PRP | 886 | 3.144  | 22.204 | 27.074 | 1.00 | 0.00 |
| C           |    |     |     |        |        |        |      |      |
| HETATM12608 | H4 | PRP | 886 | 2.949  | 21.601 | 26.187 | 1.00 | 0.00 |
| H           |    |     |     |        |        |        |      |      |
| HETATM12609 | O2 | PRP | 886 | 3.460  | 23.522 | 26.580 | 1.00 | 0.00 |
| O           |    |     |     |        |        |        |      |      |
| HETATM12610 | H5 | PRP | 886 | 2.585  | 23.897 | 26.457 | 1.00 | 0.00 |
| H           |    |     |     |        |        |        |      |      |
| HETATM12611 | C3 | PRP | 886 | 1.887  | 22.210 | 27.831 | 1.00 | 0.00 |
| C           |    |     |     |        |        |        |      |      |
| HETATM12612 | H6 | PRP | 886 | 1.804  | 21.228 | 28.297 | 1.00 | 0.00 |
| H           |    |     |     |        |        |        |      |      |
| HETATM12613 | H7 | PRP | 886 | 1.831  | 23.007 | 28.573 | 1.00 | 0.00 |
| H           |    |     |     |        |        |        |      |      |
| HETATM12614 | H8 | PRP | 886 | 1.044  | 22.251 | 27.141 | 1.00 | 0.00 |
| H           |    |     |     |        |        |        |      |      |
| HETATM12615 | O1 | PRP | 887 | 6.315  | 35.719 | 19.807 | 1.00 | 0.00 |
| O           |    |     |     |        |        |        |      |      |
| HETATM12616 | H1 | PRP | 887 | 6.303  | 36.634 | 19.519 | 1.00 | 0.00 |
| H           |    |     |     |        |        |        |      |      |
| HETATM12617 | C1 | PRP | 887 | 7.083  | 34.998 | 18.841 | 1.00 | 0.00 |
| C           |    |     |     |        |        |        |      |      |
| HETATM12618 | H2 | PRP | 887 | 6.721  | 35.215 | 17.836 | 1.00 | 0.00 |
| H           |    |     |     |        |        |        |      |      |
| HETATM12619 | H3 | PRP | 887 | 8.087  | 35.419 | 18.878 | 1.00 | 0.00 |
| H           |    |     |     |        |        |        |      |      |
| HETATM12620 | C2 | PRP | 887 | 7.098  | 33.465 | 18.987 | 1.00 | 0.00 |
| C           |    |     |     |        |        |        |      |      |
| HETATM12621 | H4 | PRP | 887 | 6.176  | 33.236 | 19.523 | 1.00 | 0.00 |
| H           |    |     |     |        |        |        |      |      |
| HETATM12622 | O2 | PRP | 887 | 8.247  | 33.256 | 19.764 | 1.00 | 0.00 |
| O           |    |     |     |        |        |        |      |      |
| HETATM12623 | H5 | PRP | 887 | 9.016  | 33.299 | 19.191 | 1.00 | 0.00 |
| H           |    |     |     |        |        |        |      |      |
| HETATM12624 | C3 | PRP | 887 | 7.084  | 32.815 | 17.580 | 1.00 | 0.00 |
| C           |    |     |     |        |        |        |      |      |
| HETATM12625 | H6 | PRP | 887 | 7.835  | 33.158 | 16.868 | 1.00 | 0.00 |
| H           |    |     |     |        |        |        |      |      |
| HETATM12626 | H7 | PRP | 887 | 6.964  | 31.752 | 17.786 | 1.00 | 0.00 |
| H           |    |     |     |        |        |        |      |      |
| HETATM12627 | H8 | PRP | 887 | 6.128  | 33.091 | 17.136 | 1.00 | 0.00 |
| H           |    |     |     |        |        |        |      |      |

|             |    |     |     |        |        |        |      |      |
|-------------|----|-----|-----|--------|--------|--------|------|------|
| HETATM12628 | O1 | PRP | 888 | 2.022  | 37.549 | 17.373 | 1.00 | 0.00 |
| O           |    |     |     |        |        |        |      |      |
| HETATM12629 | H1 | PRP | 888 | 2.535  | 36.737 | 17.375 | 1.00 | 0.00 |
| H           |    |     |     |        |        |        |      |      |
| HETATM12630 | C1 | PRP | 888 | 1.000  | 37.296 | 18.358 | 1.00 | 0.00 |
| C           |    |     |     |        |        |        |      |      |
| HETATM12631 | H2 | PRP | 888 | 0.454  | 36.515 | 17.830 | 1.00 | 0.00 |
| H           |    |     |     |        |        |        |      |      |
| HETATM12632 | H3 | PRP | 888 | 1.500  | 36.950 | 19.263 | 1.00 | 0.00 |
| H           |    |     |     |        |        |        |      |      |
| HETATM12633 | C2 | PRP | 888 | 0.045  | 38.491 | 18.528 | 1.00 | 0.00 |
| C           |    |     |     |        |        |        |      |      |
| HETATM12634 | H4 | PRP | 888 | -0.824 | 38.276 | 19.150 | 1.00 | 0.00 |
| H           |    |     |     |        |        |        |      |      |
| HETATM12635 | O2 | PRP | 888 | -0.574 | 38.863 | 17.347 | 1.00 | 0.00 |
| O           |    |     |     |        |        |        |      |      |
| HETATM12636 | H5 | PRP | 888 | 0.107  | 38.751 | 16.679 | 1.00 | 0.00 |
| H           |    |     |     |        |        |        |      |      |
| HETATM12637 | C3 | PRP | 888 | 0.808  | 39.763 | 19.089 | 1.00 | 0.00 |
| C           |    |     |     |        |        |        |      |      |
| HETATM12638 | H6 | PRP | 888 | 1.586  | 40.128 | 18.419 | 1.00 | 0.00 |
| H           |    |     |     |        |        |        |      |      |
| HETATM12639 | H7 | PRP | 888 | 0.039  | 40.536 | 19.083 | 1.00 | 0.00 |
| H           |    |     |     |        |        |        |      |      |
| HETATM12640 | H8 | PRP | 888 | 0.957  | 39.489 | 20.133 | 1.00 | 0.00 |
| H           |    |     |     |        |        |        |      |      |
| HETATM12641 | O1 | PRP | 889 | 13.361 | 50.541 | 13.323 | 1.00 | 0.00 |
| O           |    |     |     |        |        |        |      |      |
| HETATM12642 | H1 | PRP | 889 | 14.224 | 50.471 | 13.737 | 1.00 | 0.00 |
| H           |    |     |     |        |        |        |      |      |
| HETATM12643 | C1 | PRP | 889 | 12.598 | 51.443 | 14.122 | 1.00 | 0.00 |
| C           |    |     |     |        |        |        |      |      |
| HETATM12644 | H2 | PRP | 889 | 13.045 | 52.407 | 13.883 | 1.00 | 0.00 |
| H           |    |     |     |        |        |        |      |      |
| HETATM12645 | H3 | PRP | 889 | 11.546 | 51.363 | 13.849 | 1.00 | 0.00 |
| H           |    |     |     |        |        |        |      |      |
| HETATM12646 | C2 | PRP | 889 | 12.721 | 51.123 | 15.612 | 1.00 | 0.00 |
| C           |    |     |     |        |        |        |      |      |
| HETATM12647 | H4 | PRP | 889 | 12.094 | 51.806 | 16.184 | 1.00 | 0.00 |
| H           |    |     |     |        |        |        |      |      |
| HETATM12648 | O2 | PRP | 889 | 14.041 | 51.186 | 16.044 | 1.00 | 0.00 |
| O           |    |     |     |        |        |        |      |      |
| HETATM12649 | H5 | PRP | 889 | 14.068 | 50.972 | 16.979 | 1.00 | 0.00 |
| H           |    |     |     |        |        |        |      |      |
| HETATM12650 | C3 | PRP | 889 | 12.142 | 49.662 | 15.758 | 1.00 | 0.00 |
| C           |    |     |     |        |        |        |      |      |
| HETATM12651 | H6 | PRP | 889 | 11.748 | 49.388 | 16.737 | 1.00 | 0.00 |
| H           |    |     |     |        |        |        |      |      |
| HETATM12652 | H7 | PRP | 889 | 11.327 | 49.616 | 15.036 | 1.00 | 0.00 |
| H           |    |     |     |        |        |        |      |      |
| HETATM12653 | H8 | PRP | 889 | 12.974 | 48.994 | 15.537 | 1.00 | 0.00 |
| H           |    |     |     |        |        |        |      |      |
| HETATM12654 | O1 | PRP | 890 | 22.088 | 49.192 | 19.307 | 1.00 | 0.00 |
| O           |    |     |     |        |        |        |      |      |
| HETATM12655 | H1 | PRP | 890 | 22.077 | 49.892 | 19.964 | 1.00 | 0.00 |
| H           |    |     |     |        |        |        |      |      |

|             |    |     |     |        |        |        |      |      |
|-------------|----|-----|-----|--------|--------|--------|------|------|
| HETATM12656 | C1 | PRP | 890 | 20.835 | 49.220 | 18.734 | 1.00 | 0.00 |
| C           |    |     |     |        |        |        |      |      |
| HETATM12657 | H2 | PRP | 890 | 20.658 | 48.276 | 18.220 | 1.00 | 0.00 |
| H           |    |     |     |        |        |        |      |      |
| HETATM12658 | H3 | PRP | 890 | 20.063 | 49.217 | 19.504 | 1.00 | 0.00 |
| H           |    |     |     |        |        |        |      |      |
| HETATM12659 | C2 | PRP | 890 | 20.613 | 50.387 | 17.722 | 1.00 | 0.00 |
| C           |    |     |     |        |        |        |      |      |
| HETATM12660 | H4 | PRP | 890 | 21.481 | 50.413 | 17.063 | 1.00 | 0.00 |
| H           |    |     |     |        |        |        |      |      |
| HETATM12661 | O2 | PRP | 890 | 20.477 | 51.607 | 18.411 | 1.00 | 0.00 |
| O           |    |     |     |        |        |        |      |      |
| HETATM12662 | H5 | PRP | 890 | 21.319 | 52.068 | 18.419 | 1.00 | 0.00 |
| H           |    |     |     |        |        |        |      |      |
| HETATM12663 | C3 | PRP | 890 | 19.232 | 50.278 | 17.031 | 1.00 | 0.00 |
| C           |    |     |     |        |        |        |      |      |
| HETATM12664 | H6 | PRP | 890 | 19.149 | 49.257 | 16.659 | 1.00 | 0.00 |
| H           |    |     |     |        |        |        |      |      |
| HETATM12665 | H7 | PRP | 890 | 18.405 | 50.484 | 17.710 | 1.00 | 0.00 |
| H           |    |     |     |        |        |        |      |      |
| HETATM12666 | H8 | PRP | 890 | 19.192 | 51.030 | 16.243 | 1.00 | 0.00 |
| H           |    |     |     |        |        |        |      |      |
| HETATM12667 | O1 | PRP | 891 | 11.666 | 21.426 | 16.639 | 1.00 | 0.00 |
| O           |    |     |     |        |        |        |      |      |
| HETATM12668 | H1 | PRP | 891 | 12.007 | 21.043 | 17.450 | 1.00 | 0.00 |
| H           |    |     |     |        |        |        |      |      |
| HETATM12669 | C1 | PRP | 891 | 10.740 | 22.485 | 16.934 | 1.00 | 0.00 |
| C           |    |     |     |        |        |        |      |      |
| HETATM12670 | H2 | PRP | 891 | 11.181 | 23.126 | 17.698 | 1.00 | 0.00 |
| H           |    |     |     |        |        |        |      |      |
| HETATM12671 | H3 | PRP | 891 | 10.561 | 23.078 | 16.037 | 1.00 | 0.00 |
| H           |    |     |     |        |        |        |      |      |
| HETATM12672 | C2 | PRP | 891 | 9.412  | 21.853 | 17.402 | 1.00 | 0.00 |
| C           |    |     |     |        |        |        |      |      |
| HETATM12673 | H4 | PRP | 891 | 9.562  | 21.049 | 18.123 | 1.00 | 0.00 |
| H           |    |     |     |        |        |        |      |      |
| HETATM12674 | O2 | PRP | 891 | 8.700  | 21.477 | 16.303 | 1.00 | 0.00 |
| O           |    |     |     |        |        |        |      |      |
| HETATM12675 | H5 | PRP | 891 | 9.023  | 20.597 | 16.096 | 1.00 | 0.00 |
| H           |    |     |     |        |        |        |      |      |
| HETATM12676 | C3 | PRP | 891 | 8.686  | 23.047 | 18.107 | 1.00 | 0.00 |
| C           |    |     |     |        |        |        |      |      |
| HETATM12677 | H6 | PRP | 891 | 9.303  | 23.385 | 18.940 | 1.00 | 0.00 |
| H           |    |     |     |        |        |        |      |      |
| HETATM12678 | H7 | PRP | 891 | 8.536  | 23.910 | 17.459 | 1.00 | 0.00 |
| H           |    |     |     |        |        |        |      |      |
| HETATM12679 | H8 | PRP | 891 | 7.731  | 22.792 | 18.567 | 1.00 | 0.00 |
| H           |    |     |     |        |        |        |      |      |
| HETATM12680 | O1 | PRP | 892 | -7.826 | 29.092 | 13.266 | 1.00 | 0.00 |
| O           |    |     |     |        |        |        |      |      |
| HETATM12681 | H1 | PRP | 892 | -8.594 | 29.609 | 13.521 | 1.00 | 0.00 |
| H           |    |     |     |        |        |        |      |      |
| HETATM12682 | C1 | PRP | 892 | -7.850 | 27.905 | 14.013 | 1.00 | 0.00 |
| C           |    |     |     |        |        |        |      |      |
| HETATM12683 | H2 | PRP | 892 | -7.959 | 28.112 | 15.077 | 1.00 | 0.00 |
| H           |    |     |     |        |        |        |      |      |



|             |    |     |     |        |        |        |      |      |
|-------------|----|-----|-----|--------|--------|--------|------|------|
| HETATM12684 | H3 | PRP | 892 | -8.776 | 27.398 | 13.742 | 1.00 | 0.00 |
| H           |    |     |     |        |        |        |      |      |
| HETATM12685 | C2 | PRP | 892 | -6.500 | 27.155 | 13.804 | 1.00 | 0.00 |
| C           |    |     |     |        |        |        |      |      |
| HETATM12686 | H4 | PRP | 892 | -5.701 | 27.817 | 14.141 | 1.00 | 0.00 |
| H           |    |     |     |        |        |        |      |      |
| HETATM12687 | O2 | PRP | 892 | -6.309 | 26.774 | 12.469 | 1.00 | 0.00 |
| O           |    |     |     |        |        |        |      |      |
| HETATM12688 | H5 | PRP | 892 | -6.447 | 27.495 | 11.851 | 1.00 | 0.00 |
| H           |    |     |     |        |        |        |      |      |
| HETATM12689 | C3 | PRP | 892 | -6.484 | 25.806 | 14.571 | 1.00 | 0.00 |
| C           |    |     |     |        |        |        |      |      |
| HETATM12690 | H6 | PRP | 892 | -7.116 | 25.060 | 14.089 | 1.00 | 0.00 |
| H           |    |     |     |        |        |        |      |      |
| HETATM12691 | H7 | PRP | 892 | -5.477 | 25.419 | 14.422 | 1.00 | 0.00 |
| H           |    |     |     |        |        |        |      |      |
| HETATM12692 | H8 | PRP | 892 | -6.772 | 25.870 | 15.621 | 1.00 | 0.00 |
| H           |    |     |     |        |        |        |      |      |
| HETATM12693 | O1 | PRP | 893 | 1.816  | 32.483 | 25.067 | 1.00 | 0.00 |
| O           |    |     |     |        |        |        |      |      |
| HETATM12694 | H1 | PRP | 893 | 1.890  | 33.172 | 25.732 | 1.00 | 0.00 |
| H           |    |     |     |        |        |        |      |      |
| HETATM12695 | C1 | PRP | 893 | 3.082  | 32.516 | 24.421 | 1.00 | 0.00 |
| C           |    |     |     |        |        |        |      |      |
| HETATM12696 | H2 | PRP | 893 | 3.725  | 32.986 | 25.165 | 1.00 | 0.00 |
| H           |    |     |     |        |        |        |      |      |
| HETATM12697 | H3 | PRP | 893 | 3.549  | 31.558 | 24.190 | 1.00 | 0.00 |
| H           |    |     |     |        |        |        |      |      |
| HETATM12698 | C2 | PRP | 893 | 3.127  | 33.398 | 23.191 | 1.00 | 0.00 |
| C           |    |     |     |        |        |        |      |      |
| HETATM12699 | H4 | PRP | 893 | 2.668  | 34.346 | 23.472 | 1.00 | 0.00 |
| H           |    |     |     |        |        |        |      |      |
| HETATM12700 | O2 | PRP | 893 | 2.311  | 32.791 | 22.209 | 1.00 | 0.00 |
| O           |    |     |     |        |        |        |      |      |
| HETATM12701 | H5 | PRP | 893 | 1.504  | 32.482 | 22.627 | 1.00 | 0.00 |
| H           |    |     |     |        |        |        |      |      |
| HETATM12702 | C3 | PRP | 893 | 4.509  | 33.638 | 22.691 | 1.00 | 0.00 |
| C           |    |     |     |        |        |        |      |      |
| HETATM12703 | H6 | PRP | 893 | 4.958  | 34.203 | 23.508 | 1.00 | 0.00 |
| H           |    |     |     |        |        |        |      |      |
| HETATM12704 | H7 | PRP | 893 | 5.033  | 32.706 | 22.480 | 1.00 | 0.00 |
| H           |    |     |     |        |        |        |      |      |
| HETATM12705 | H8 | PRP | 893 | 4.433  | 34.242 | 21.787 | 1.00 | 0.00 |
| H           |    |     |     |        |        |        |      |      |
| HETATM12706 | O1 | PRP | 894 | 9.319  | 55.336 | 3.901  | 1.00 | 0.00 |
| O           |    |     |     |        |        |        |      |      |
| HETATM12707 | H1 | PRP | 894 | 8.645  | 56.009 | 4.018  | 1.00 | 0.00 |
| H           |    |     |     |        |        |        |      |      |
| HETATM12708 | C1 | PRP | 894 | 9.462  | 54.905 | 5.247  | 1.00 | 0.00 |
| C           |    |     |     |        |        |        |      |      |
| HETATM12709 | H2 | PRP | 894 | 8.524  | 54.450 | 5.565  | 1.00 | 0.00 |
| H           |    |     |     |        |        |        |      |      |
| HETATM12710 | H3 | PRP | 894 | 10.249 | 54.157 | 5.347  | 1.00 | 0.00 |
| H           |    |     |     |        |        |        |      |      |
| HETATM12711 | C2 | PRP | 894 | 9.925  | 56.027 | 6.227  | 1.00 | 0.00 |
| C           |    |     |     |        |        |        |      |      |

|             |    |     |     |         |        |        |      |      |
|-------------|----|-----|-----|---------|--------|--------|------|------|
| HETATM12712 | H4 | PRP | 894 | 9.969   | 55.660 | 7.252  | 1.00 | 0.00 |
| H           |    |     |     |         |        |        |      |      |
| HETATM12713 | O2 | PRP | 894 | 8.942   | 57.044 | 6.238  | 1.00 | 0.00 |
| O           |    |     |     |         |        |        |      |      |
| HETATM12714 | H5 | PRP | 894 | 9.247   | 57.674 | 6.895  | 1.00 | 0.00 |
| H           |    |     |     |         |        |        |      |      |
| HETATM12715 | C3 | PRP | 894 | 11.351  | 56.631 | 6.054  | 1.00 | 0.00 |
| C           |    |     |     |         |        |        |      |      |
| HETATM12716 | H6 | PRP | 894 | 11.281  | 57.553 | 5.476  | 1.00 | 0.00 |
| H           |    |     |     |         |        |        |      |      |
| HETATM12717 | H7 | PRP | 894 | 11.848  | 56.729 | 7.019  | 1.00 | 0.00 |
| H           |    |     |     |         |        |        |      |      |
| HETATM12718 | H8 | PRP | 894 | 11.916  | 55.922 | 5.448  | 1.00 | 0.00 |
| H           |    |     |     |         |        |        |      |      |
| HETATM12719 | O1 | PRP | 895 | 20.027  | 37.812 | 17.979 | 1.00 | 0.00 |
| O           |    |     |     |         |        |        |      |      |
| HETATM12720 | H1 | PRP | 895 | 19.704  | 37.117 | 17.401 | 1.00 | 0.00 |
| H           |    |     |     |         |        |        |      |      |
| HETATM12721 | C1 | PRP | 895 | 20.733  | 38.702 | 17.148 | 1.00 | 0.00 |
| C           |    |     |     |         |        |        |      |      |
| HETATM12722 | H2 | PRP | 895 | 20.026  | 39.224 | 16.503 | 1.00 | 0.00 |
| H           |    |     |     |         |        |        |      |      |
| HETATM12723 | H3 | PRP | 895 | 21.196  | 39.443 | 17.800 | 1.00 | 0.00 |
| H           |    |     |     |         |        |        |      |      |
| HETATM12724 | C2 | PRP | 895 | 21.848  | 38.034 | 16.286 | 1.00 | 0.00 |
| C           |    |     |     |         |        |        |      |      |
| HETATM12725 | H4 | PRP | 895 | 22.488  | 38.876 | 16.022 | 1.00 | 0.00 |
| H           |    |     |     |         |        |        |      |      |
| HETATM12726 | O2 | PRP | 895 | 21.367  | 37.251 | 15.184 | 1.00 | 0.00 |
| O           |    |     |     |         |        |        |      |      |
| HETATM12727 | H5 | PRP | 895 | 20.520  | 36.827 | 15.341 | 1.00 | 0.00 |
| H           |    |     |     |         |        |        |      |      |
| HETATM12728 | C3 | PRP | 895 | 22.820  | 36.986 | 16.888 | 1.00 | 0.00 |
| C           |    |     |     |         |        |        |      |      |
| HETATM12729 | H6 | PRP | 895 | 23.287  | 36.517 | 16.021 | 1.00 | 0.00 |
| H           |    |     |     |         |        |        |      |      |
| HETATM12730 | H7 | PRP | 895 | 23.571  | 37.453 | 17.525 | 1.00 | 0.00 |
| H           |    |     |     |         |        |        |      |      |
| HETATM12731 | H8 | PRP | 895 | 22.151  | 36.328 | 17.443 | 1.00 | 0.00 |
| H           |    |     |     |         |        |        |      |      |
| HETATM12732 | O1 | PRP | 896 | -9.111  | 8.807  | 11.646 | 1.00 | 0.00 |
| O           |    |     |     |         |        |        |      |      |
| HETATM12733 | H1 | PRP | 896 | -9.720  | 9.005  | 12.362 | 1.00 | 0.00 |
| H           |    |     |     |         |        |        |      |      |
| HETATM12734 | C1 | PRP | 896 | -9.750  | 8.259  | 10.459 | 1.00 | 0.00 |
| C           |    |     |     |         |        |        |      |      |
| HETATM12735 | H2 | PRP | 896 | -8.929  | 7.930  | 9.822  | 1.00 | 0.00 |
| H           |    |     |     |         |        |        |      |      |
| HETATM12736 | H3 | PRP | 896 | -10.370 | 7.460  | 10.865 | 1.00 | 0.00 |
| H           |    |     |     |         |        |        |      |      |
| HETATM12737 | C2 | PRP | 896 | -10.620 | 9.310  | 9.770  | 1.00 | 0.00 |
| C           |    |     |     |         |        |        |      |      |
| HETATM12738 | H4 | PRP | 896 | -10.162 | 10.295 | 9.675  | 1.00 | 0.00 |
| H           |    |     |     |         |        |        |      |      |
| HETATM12739 | O2 | PRP | 896 | -11.834 | 9.473  | 10.427 | 1.00 | 0.00 |
| O           |    |     |     |         |        |        |      |      |

|             |    |     |     |         |        |        |      |      |
|-------------|----|-----|-----|---------|--------|--------|------|------|
| HETATM12740 | H5 | PRP | 896 | -12.364 | 10.216 | 10.129 | 1.00 | 0.00 |
| H           |    |     |     |         |        |        |      |      |
| HETATM12741 | C3 | PRP | 896 | -11.109 | 8.814  | 8.373  | 1.00 | 0.00 |
| C           |    |     |     |         |        |        |      |      |
| HETATM12742 | H6 | PRP | 896 | -11.738 | 7.925  | 8.372  | 1.00 | 0.00 |
| H           |    |     |     |         |        |        |      |      |
| HETATM12743 | H7 | PRP | 896 | -11.637 | 9.644  | 7.903  | 1.00 | 0.00 |
| H           |    |     |     |         |        |        |      |      |
| HETATM12744 | H8 | PRP | 896 | -10.266 | 8.540  | 7.738  | 1.00 | 0.00 |
| H           |    |     |     |         |        |        |      |      |
| HETATM12745 | O1 | PRP | 897 | 3.949   | 24.129 | 12.488 | 1.00 | 0.00 |
| O           |    |     |     |         |        |        |      |      |
| HETATM12746 | H1 | PRP | 897 | 3.176   | 23.606 | 12.714 | 1.00 | 0.00 |
| H           |    |     |     |         |        |        |      |      |
| HETATM12747 | C1 | PRP | 897 | 4.793   | 24.200 | 13.659 | 1.00 | 0.00 |
| C           |    |     |     |         |        |        |      |      |
| HETATM12748 | H2 | PRP | 897 | 5.841   | 24.404 | 13.439 | 1.00 | 0.00 |
| H           |    |     |     |         |        |        |      |      |
| HETATM12749 | H3 | PRP | 897 | 4.564   | 24.983 | 14.381 | 1.00 | 0.00 |
| H           |    |     |     |         |        |        |      |      |
| HETATM12750 | C2 | PRP | 897 | 4.781   | 22.820 | 14.327 | 1.00 | 0.00 |
| C           |    |     |     |         |        |        |      |      |
| HETATM12751 | H4 | PRP | 897 | 5.294   | 22.150 | 13.637 | 1.00 | 0.00 |
| H           |    |     |     |         |        |        |      |      |
| HETATM12752 | O2 | PRP | 897 | 3.454   | 22.497 | 14.531 | 1.00 | 0.00 |
| O           |    |     |     |         |        |        |      |      |
| HETATM12753 | H5 | PRP | 897 | 3.396   | 21.958 | 15.323 | 1.00 | 0.00 |
| H           |    |     |     |         |        |        |      |      |
| HETATM12754 | C3 | PRP | 897 | 5.555   | 22.755 | 15.656 | 1.00 | 0.00 |
| C           |    |     |     |         |        |        |      |      |
| HETATM12755 | H6 | PRP | 897 | 4.886   | 23.061 | 16.460 | 1.00 | 0.00 |
| H           |    |     |     |         |        |        |      |      |
| HETATM12756 | H7 | PRP | 897 | 5.956   | 21.744 | 15.722 | 1.00 | 0.00 |
| H           |    |     |     |         |        |        |      |      |
| HETATM12757 | H8 | PRP | 897 | 6.408   | 23.428 | 15.569 | 1.00 | 0.00 |
| H           |    |     |     |         |        |        |      |      |
| HETATM12758 | O1 | PRP | 898 | 22.990  | 48.672 | 2.907  | 1.00 | 0.00 |
| O           |    |     |     |         |        |        |      |      |
| HETATM12759 | H1 | PRP | 898 | 22.509  | 47.877 | 3.147  | 1.00 | 0.00 |
| H           |    |     |     |         |        |        |      |      |
| HETATM12760 | C1 | PRP | 898 | 22.413  | 49.721 | 3.708  | 1.00 | 0.00 |
| C           |    |     |     |         |        |        |      |      |
| HETATM12761 | H2 | PRP | 898 | 21.686  | 49.180 | 4.313  | 1.00 | 0.00 |
| H           |    |     |     |         |        |        |      |      |
| HETATM12762 | H3 | PRP | 898 | 23.131  | 50.242 | 4.341  | 1.00 | 0.00 |
| H           |    |     |     |         |        |        |      |      |
| HETATM12763 | C2 | PRP | 898 | 21.604  | 50.604 | 2.846  | 1.00 | 0.00 |
| C           |    |     |     |         |        |        |      |      |
| HETATM12764 | H4 | PRP | 898 | 21.353  | 49.955 | 2.008  | 1.00 | 0.00 |
| H           |    |     |     |         |        |        |      |      |
| HETATM12765 | O2 | PRP | 898 | 22.510  | 51.626 | 2.362  | 1.00 | 0.00 |
| O           |    |     |     |         |        |        |      |      |
| HETATM12766 | H5 | PRP | 898 | 22.104  | 52.098 | 1.631  | 1.00 | 0.00 |
| H           |    |     |     |         |        |        |      |      |
| HETATM12767 | C3 | PRP | 898 | 20.314  | 51.139 | 3.521  | 1.00 | 0.00 |
| C           |    |     |     |         |        |        |      |      |

|             |    |     |     |        |        |        |      |      |
|-------------|----|-----|-----|--------|--------|--------|------|------|
| HETATM12768 | H6 | PRP | 898 | 19.520 | 50.392 | 3.519  | 1.00 | 0.00 |
| H           |    |     |     |        |        |        |      |      |
| HETATM12769 | H7 | PRP | 898 | 20.692 | 51.507 | 4.475  | 1.00 | 0.00 |
| H           |    |     |     |        |        |        |      |      |
| HETATM12770 | H8 | PRP | 898 | 19.975 | 52.023 | 2.982  | 1.00 | 0.00 |
| H           |    |     |     |        |        |        |      |      |
| HETATM12771 | O1 | PRP | 899 | 8.083  | 12.366 | 11.705 | 1.00 | 0.00 |
| O           |    |     |     |        |        |        |      |      |
| HETATM12772 | H1 | PRP | 899 | 8.298  | 12.617 | 10.803 | 1.00 | 0.00 |
| H           |    |     |     |        |        |        |      |      |
| HETATM12773 | C1 | PRP | 899 | 6.719  | 12.216 | 11.877 | 1.00 | 0.00 |
| C           |    |     |     |        |        |        |      |      |
| HETATM12774 | H2 | PRP | 899 | 6.299  | 11.447 | 11.230 | 1.00 | 0.00 |
| H           |    |     |     |        |        |        |      |      |
| HETATM12775 | H3 | PRP | 899 | 6.507  | 11.909 | 12.901 | 1.00 | 0.00 |
| H           |    |     |     |        |        |        |      |      |
| HETATM12776 | C2 | PRP | 899 | 5.906  | 13.507 | 11.734 | 1.00 | 0.00 |
| C           |    |     |     |        |        |        |      |      |
| HETATM12777 | H4 | PRP | 899 | 4.859  | 13.330 | 11.980 | 1.00 | 0.00 |
| H           |    |     |     |        |        |        |      |      |
| HETATM12778 | O2 | PRP | 899 | 5.884  | 13.778 | 10.393 | 1.00 | 0.00 |
| O           |    |     |     |        |        |        |      |      |
| HETATM12779 | H5 | PRP | 899 | 6.811  | 13.911 | 10.179 | 1.00 | 0.00 |
| H           |    |     |     |        |        |        |      |      |
| HETATM12780 | C3 | PRP | 899 | 6.284  | 14.757 | 12.552 | 1.00 | 0.00 |
| C           |    |     |     |        |        |        |      |      |
| HETATM12781 | H6 | PRP | 899 | 6.038  | 15.659 | 11.993 | 1.00 | 0.00 |
| H           |    |     |     |        |        |        |      |      |
| HETATM12782 | H7 | PRP | 899 | 5.622  | 14.743 | 13.418 | 1.00 | 0.00 |
| H           |    |     |     |        |        |        |      |      |
| HETATM12783 | H8 | PRP | 899 | 7.331  | 14.579 | 12.799 | 1.00 | 0.00 |
| H           |    |     |     |        |        |        |      |      |
| HETATM12784 | O1 | PRP | 900 | -5.614 | 26.334 | 5.964  | 1.00 | 0.00 |
| O           |    |     |     |        |        |        |      |      |
| HETATM12785 | H1 | PRP | 900 | -5.738 | 25.532 | 5.452  | 1.00 | 0.00 |
| H           |    |     |     |        |        |        |      |      |
| HETATM12786 | C1 | PRP | 900 | -5.171 | 25.981 | 7.257  | 1.00 | 0.00 |
| C           |    |     |     |        |        |        |      |      |
| HETATM12787 | H2 | PRP | 900 | -4.746 | 26.826 | 7.799  | 1.00 | 0.00 |
| H           |    |     |     |        |        |        |      |      |
| HETATM12788 | H3 | PRP | 900 | -6.049 | 25.707 | 7.842  | 1.00 | 0.00 |
| H           |    |     |     |        |        |        |      |      |
| HETATM12789 | C2 | PRP | 900 | -4.123 | 24.822 | 7.251  | 1.00 | 0.00 |
| C           |    |     |     |        |        |        |      |      |
| HETATM12790 | H4 | PRP | 900 | -3.297 | 25.078 | 6.587  | 1.00 | 0.00 |
| H           |    |     |     |        |        |        |      |      |
| HETATM12791 | O2 | PRP | 900 | -4.569 | 23.630 | 6.585  | 1.00 | 0.00 |
| O           |    |     |     |        |        |        |      |      |
| HETATM12792 | H5 | PRP | 900 | -3.800 | 23.064 | 6.490  | 1.00 | 0.00 |
| H           |    |     |     |        |        |        |      |      |
| HETATM12793 | C3 | PRP | 900 | -3.690 | 24.481 | 8.685  | 1.00 | 0.00 |
| C           |    |     |     |        |        |        |      |      |
| HETATM12794 | H6 | PRP | 900 | -4.618 | 24.127 | 9.133  | 1.00 | 0.00 |
| H           |    |     |     |        |        |        |      |      |
| HETATM12795 | H7 | PRP | 900 | -2.815 | 23.831 | 8.662  | 1.00 | 0.00 |
| H           |    |     |     |        |        |        |      |      |

|             |    |     |     |        |        |        |      |      |
|-------------|----|-----|-----|--------|--------|--------|------|------|
| HETATM12796 | H8 | PRP | 900 | -3.320 | 25.391 | 9.158  | 1.00 | 0.00 |
| H           |    |     |     |        |        |        |      |      |
| HETATM12797 | O1 | PRP | 901 | -2.044 | 12.755 | 16.011 | 1.00 | 0.00 |
| O           |    |     |     |        |        |        |      |      |
| HETATM12798 | H1 | PRP | 901 | -1.975 | 12.486 | 16.930 | 1.00 | 0.00 |
| H           |    |     |     |        |        |        |      |      |
| HETATM12799 | C1 | PRP | 901 | -2.827 | 13.944 | 15.855 | 1.00 | 0.00 |
| C           |    |     |     |        |        |        |      |      |
| HETATM12800 | H2 | PRP | 901 | -2.295 | 14.702 | 16.430 | 1.00 | 0.00 |
| H           |    |     |     |        |        |        |      |      |
| HETATM12801 | H3 | PRP | 901 | -2.941 | 14.219 | 14.807 | 1.00 | 0.00 |
| H           |    |     |     |        |        |        |      |      |
| HETATM12802 | C2 | PRP | 901 | -4.176 | 13.711 | 16.516 | 1.00 | 0.00 |
| C           |    |     |     |        |        |        |      |      |
| HETATM12803 | H4 | PRP | 901 | -4.751 | 14.637 | 16.536 | 1.00 | 0.00 |
| H           |    |     |     |        |        |        |      |      |
| HETATM12804 | O2 | PRP | 901 | -3.867 | 13.391 | 17.870 | 1.00 | 0.00 |
| O           |    |     |     |        |        |        |      |      |
| HETATM12805 | H5 | PRP | 901 | -3.645 | 14.202 | 18.332 | 1.00 | 0.00 |
| H           |    |     |     |        |        |        |      |      |
| HETATM12806 | C3 | PRP | 901 | -5.105 | 12.582 | 15.938 | 1.00 | 0.00 |
| C           |    |     |     |        |        |        |      |      |
| HETATM12807 | H6 | PRP | 901 | -6.078 | 12.511 | 16.426 | 1.00 | 0.00 |
| H           |    |     |     |        |        |        |      |      |
| HETATM12808 | H7 | PRP | 901 | -5.258 | 12.776 | 14.876 | 1.00 | 0.00 |
| H           |    |     |     |        |        |        |      |      |
| HETATM12809 | H8 | PRP | 901 | -4.616 | 11.616 | 16.065 | 1.00 | 0.00 |
| H           |    |     |     |        |        |        |      |      |
| HETATM12810 | O1 | PRP | 902 | 21.510 | 44.277 | 7.412  | 1.00 | 0.00 |
| O           |    |     |     |        |        |        |      |      |
| HETATM12811 | H1 | PRP | 902 | 20.891 | 44.558 | 6.734  | 1.00 | 0.00 |
| H           |    |     |     |        |        |        |      |      |
| HETATM12812 | C1 | PRP | 902 | 22.489 | 45.276 | 7.705  | 1.00 | 0.00 |
| C           |    |     |     |        |        |        |      |      |
| HETATM12813 | H2 | PRP | 902 | 22.789 | 45.116 | 8.741  | 1.00 | 0.00 |
| H           |    |     |     |        |        |        |      |      |
| HETATM12814 | H3 | PRP | 902 | 23.331 | 45.172 | 7.020  | 1.00 | 0.00 |
| H           |    |     |     |        |        |        |      |      |
| HETATM12815 | C2 | PRP | 902 | 21.920 | 46.711 | 7.402  | 1.00 | 0.00 |
| C           |    |     |     |        |        |        |      |      |
| HETATM12816 | H4 | PRP | 902 | 21.435 | 47.060 | 8.313  | 1.00 | 0.00 |
| H           |    |     |     |        |        |        |      |      |
| HETATM12817 | O2 | PRP | 902 | 20.950 | 46.738 | 6.382  | 1.00 | 0.00 |
| O           |    |     |     |        |        |        |      |      |
| HETATM12818 | H5 | PRP | 902 | 20.673 | 47.657 | 6.415  | 1.00 | 0.00 |
| H           |    |     |     |        |        |        |      |      |
| HETATM12819 | C3 | PRP | 902 | 23.088 | 47.658 | 7.132  | 1.00 | 0.00 |
| C           |    |     |     |        |        |        |      |      |
| HETATM12820 | H6 | PRP | 902 | 22.784 | 48.705 | 7.152  | 1.00 | 0.00 |
| H           |    |     |     |        |        |        |      |      |
| HETATM12821 | H7 | PRP | 902 | 23.770 | 47.565 | 7.977  | 1.00 | 0.00 |
| H           |    |     |     |        |        |        |      |      |
| HETATM12822 | H8 | PRP | 902 | 23.658 | 47.344 | 6.257  | 1.00 | 0.00 |
| H           |    |     |     |        |        |        |      |      |
| HETATM12823 | O1 | PRP | 903 | -6.513 | 16.056 | 16.673 | 1.00 | 0.00 |
| O           |    |     |     |        |        |        |      |      |

|             |    |     |     |        |        |        |      |      |
|-------------|----|-----|-----|--------|--------|--------|------|------|
| HETATM12824 | H1 | PRP | 903 | -5.985 | 16.847 | 16.802 | 1.00 | 0.00 |
| H           |    |     |     |        |        |        |      |      |
| HETATM12825 | C1 | PRP | 903 | -7.754 | 16.278 | 17.391 | 1.00 | 0.00 |
| C           |    |     |     |        |        |        |      |      |
| HETATM12826 | H2 | PRP | 903 | -8.371 | 15.382 | 17.330 | 1.00 | 0.00 |
| H           |    |     |     |        |        |        |      |      |
| HETATM12827 | H3 | PRP | 903 | -7.545 | 16.321 | 18.460 | 1.00 | 0.00 |
| H           |    |     |     |        |        |        |      |      |
| HETATM12828 | C2 | PRP | 903 | -8.380 | 17.554 | 16.884 | 1.00 | 0.00 |
| C           |    |     |     |        |        |        |      |      |
| HETATM12829 | H4 | PRP | 903 | -9.374 | 17.648 | 17.322 | 1.00 | 0.00 |
| H           |    |     |     |        |        |        |      |      |
| HETATM12830 | O2 | PRP | 903 | -8.403 | 17.743 | 15.476 | 1.00 | 0.00 |
| O           |    |     |     |        |        |        |      |      |
| HETATM12831 | H5 | PRP | 903 | -9.182 | 18.299 | 15.403 | 1.00 | 0.00 |
| H           |    |     |     |        |        |        |      |      |
| HETATM12832 | C3 | PRP | 903 | -7.596 | 18.724 | 17.421 | 1.00 | 0.00 |
| C           |    |     |     |        |        |        |      |      |
| HETATM12833 | H6 | PRP | 903 | -7.638 | 18.909 | 18.494 | 1.00 | 0.00 |
| H           |    |     |     |        |        |        |      |      |
| HETATM12834 | H7 | PRP | 903 | -6.561 | 18.688 | 17.079 | 1.00 | 0.00 |
| H           |    |     |     |        |        |        |      |      |
| HETATM12835 | H8 | PRP | 903 | -8.039 | 19.590 | 16.928 | 1.00 | 0.00 |
| H           |    |     |     |        |        |        |      |      |
| HETATM12836 | O1 | PRP | 904 | 9.843  | 7.990  | 9.080  | 1.00 | 0.00 |
| O           |    |     |     |        |        |        |      |      |
| HETATM12837 | H1 | PRP | 904 | 10.683 | 7.526  | 9.110  | 1.00 | 0.00 |
| H           |    |     |     |        |        |        |      |      |
| HETATM12838 | C1 | PRP | 904 | 9.065  | 7.060  | 8.266  | 1.00 | 0.00 |
| C           |    |     |     |        |        |        |      |      |
| HETATM12839 | H2 | PRP | 904 | 8.454  | 7.708  | 7.636  | 1.00 | 0.00 |
| H           |    |     |     |        |        |        |      |      |
| HETATM12840 | H3 | PRP | 904 | 9.728  | 6.469  | 7.636  | 1.00 | 0.00 |
| H           |    |     |     |        |        |        |      |      |
| HETATM12841 | C2 | PRP | 904 | 8.171  | 6.288  | 9.242  | 1.00 | 0.00 |
| C           |    |     |     |        |        |        |      |      |
| HETATM12842 | H4 | PRP | 904 | 7.561  | 5.615  | 8.640  | 1.00 | 0.00 |
| H           |    |     |     |        |        |        |      |      |
| HETATM12843 | O2 | PRP | 904 | 7.272  | 7.266  | 9.829  | 1.00 | 0.00 |
| O           |    |     |     |        |        |        |      |      |
| HETATM12844 | H5 | PRP | 904 | 7.923  | 7.946  | 10.020 | 1.00 | 0.00 |
| H           |    |     |     |        |        |        |      |      |
| HETATM12845 | C3 | PRP | 904 | 8.856  | 5.505  | 10.345 | 1.00 | 0.00 |
| C           |    |     |     |        |        |        |      |      |
| HETATM12846 | H6 | PRP | 904 | 9.324  | 6.166  | 11.074 | 1.00 | 0.00 |
| H           |    |     |     |        |        |        |      |      |
| HETATM12847 | H7 | PRP | 904 | 8.243  | 4.806  | 10.914 | 1.00 | 0.00 |
| H           |    |     |     |        |        |        |      |      |
| HETATM12848 | H8 | PRP | 904 | 9.697  | 4.969  | 9.906  | 1.00 | 0.00 |
| H           |    |     |     |        |        |        |      |      |
| HETATM12849 | O1 | PRP | 905 | 4.571  | 9.189  | 14.416 | 1.00 | 0.00 |
| O           |    |     |     |        |        |        |      |      |
| HETATM12850 | H1 | PRP | 905 | 4.733  | 9.934  | 14.999 | 1.00 | 0.00 |
| H           |    |     |     |        |        |        |      |      |
| HETATM12851 | C1 | PRP | 905 | 4.174  | 8.079  | 15.290 | 1.00 | 0.00 |
| C           |    |     |     |        |        |        |      |      |

|             |    |     |     |        |        |        |      |      |
|-------------|----|-----|-----|--------|--------|--------|------|------|
| HETATM12852 | H2 | PRP | 905 | 5.104  | 7.836  | 15.803 | 1.00 | 0.00 |
| H           |    |     |     |        |        |        |      |      |
| HETATM12853 | H3 | PRP | 905 | 3.309  | 8.436  | 15.849 | 1.00 | 0.00 |
| H           |    |     |     |        |        |        |      |      |
| HETATM12854 | C2 | PRP | 905 | 3.689  | 6.894  | 14.401 | 1.00 | 0.00 |
| C           |    |     |     |        |        |        |      |      |
| HETATM12855 | H4 | PRP | 905 | 4.501  | 6.471  | 13.810 | 1.00 | 0.00 |
| H           |    |     |     |        |        |        |      |      |
| HETATM12856 | O2 | PRP | 905 | 2.610  | 7.422  | 13.695 | 1.00 | 0.00 |
| O           |    |     |     |        |        |        |      |      |
| HETATM12857 | H5 | PRP | 905 | 2.928  | 8.183  | 13.203 | 1.00 | 0.00 |
| H           |    |     |     |        |        |        |      |      |
| HETATM12858 | C3 | PRP | 905 | 3.098  | 5.813  | 15.261 | 1.00 | 0.00 |
| C           |    |     |     |        |        |        |      |      |
| HETATM12859 | H6 | PRP | 905 | 2.228  | 6.225  | 15.773 | 1.00 | 0.00 |
| H           |    |     |     |        |        |        |      |      |
| HETATM12860 | H7 | PRP | 905 | 2.794  | 4.962  | 14.652 | 1.00 | 0.00 |
| H           |    |     |     |        |        |        |      |      |
| HETATM12861 | H8 | PRP | 905 | 3.865  | 5.490  | 15.965 | 1.00 | 0.00 |
| H           |    |     |     |        |        |        |      |      |
| HETATM12862 | O1 | PRP | 906 | 17.275 | 25.178 | 6.473  | 1.00 | 0.00 |
| O           |    |     |     |        |        |        |      |      |
| HETATM12863 | H1 | PRP | 906 | 18.185 | 24.932 | 6.293  | 1.00 | 0.00 |
| H           |    |     |     |        |        |        |      |      |
| HETATM12864 | C1 | PRP | 906 | 16.889 | 26.256 | 5.647  | 1.00 | 0.00 |
| C           |    |     |     |        |        |        |      |      |
| HETATM12865 | H2 | PRP | 906 | 17.511 | 27.108 | 5.920  | 1.00 | 0.00 |
| H           |    |     |     |        |        |        |      |      |
| HETATM12866 | H3 | PRP | 906 | 17.107 | 26.083 | 4.593  | 1.00 | 0.00 |
| H           |    |     |     |        |        |        |      |      |
| HETATM12867 | C2 | PRP | 906 | 15.463 | 26.558 | 5.926  | 1.00 | 0.00 |
| C           |    |     |     |        |        |        |      |      |
| HETATM12868 | H4 | PRP | 906 | 15.250 | 27.464 | 5.359  | 1.00 | 0.00 |
| H           |    |     |     |        |        |        |      |      |
| HETATM12869 | O2 | PRP | 906 | 15.432 | 26.819 | 7.359  | 1.00 | 0.00 |
| O           |    |     |     |        |        |        |      |      |
| HETATM12870 | H5 | PRP | 906 | 16.298 | 26.523 | 7.650  | 1.00 | 0.00 |
| H           |    |     |     |        |        |        |      |      |
| HETATM12871 | C3 | PRP | 906 | 14.564 | 25.335 | 5.535  | 1.00 | 0.00 |
| C           |    |     |     |        |        |        |      |      |
| HETATM12872 | H6 | PRP | 906 | 13.519 | 25.637 | 5.461  | 1.00 | 0.00 |
| H           |    |     |     |        |        |        |      |      |
| HETATM12873 | H7 | PRP | 906 | 14.777 | 25.157 | 4.481  | 1.00 | 0.00 |
| H           |    |     |     |        |        |        |      |      |
| HETATM12874 | H8 | PRP | 906 | 14.619 | 24.430 | 6.139  | 1.00 | 0.00 |
| H           |    |     |     |        |        |        |      |      |
| HETATM12875 | O1 | PRP | 907 | 9.401  | 14.474 | 6.506  | 1.00 | 0.00 |
| O           |    |     |     |        |        |        |      |      |
| HETATM12876 | H1 | PRP | 907 | 9.132  | 15.221 | 5.965  | 1.00 | 0.00 |
| H           |    |     |     |        |        |        |      |      |
| HETATM12877 | C1 | PRP | 907 | 8.226  | 13.795 | 6.858  | 1.00 | 0.00 |
| C           |    |     |     |        |        |        |      |      |
| HETATM12878 | H2 | PRP | 907 | 7.377  | 14.475 | 6.795  | 1.00 | 0.00 |
| H           |    |     |     |        |        |        |      |      |
| HETATM12879 | H3 | PRP | 907 | 7.964  | 13.030 | 6.126  | 1.00 | 0.00 |
| H           |    |     |     |        |        |        |      |      |

|             |    |     |     |        |        |        |      |      |
|-------------|----|-----|-----|--------|--------|--------|------|------|
| HETATM12880 | C2 | PRP | 907 | 8.322  | 13.063 | 8.252  | 1.00 | 0.00 |
| C           |    |     |     |        |        |        |      |      |
| HETATM12881 | H4 | PRP | 907 | 7.374  | 12.587 | 8.499  | 1.00 | 0.00 |
| H           |    |     |     |        |        |        |      |      |
| HETATM12882 | O2 | PRP | 907 | 8.733  | 13.810 | 9.370  | 1.00 | 0.00 |
| O           |    |     |     |        |        |        |      |      |
| HETATM12883 | H5 | PRP | 907 | 9.553  | 14.237 | 9.111  | 1.00 | 0.00 |
| H           |    |     |     |        |        |        |      |      |
| HETATM12884 | C3 | PRP | 907 | 9.364  | 11.926 | 8.137  | 1.00 | 0.00 |
| C           |    |     |     |        |        |        |      |      |
| HETATM12885 | H6 | PRP | 907 | 9.626  | 11.513 | 9.111  | 1.00 | 0.00 |
| H           |    |     |     |        |        |        |      |      |
| HETATM12886 | H7 | PRP | 907 | 8.855  | 11.174 | 7.534  | 1.00 | 0.00 |
| H           |    |     |     |        |        |        |      |      |
| HETATM12887 | H8 | PRP | 907 | 10.181 | 12.388 | 7.583  | 1.00 | 0.00 |
| H           |    |     |     |        |        |        |      |      |
| HETATM12888 | O1 | PRP | 908 | 19.661 | 28.925 | 5.411  | 1.00 | 0.00 |
| O           |    |     |     |        |        |        |      |      |
| HETATM12889 | H1 | PRP | 908 | 19.303 | 29.377 | 6.179  | 1.00 | 0.00 |
| H           |    |     |     |        |        |        |      |      |
| HETATM12890 | C1 | PRP | 908 | 20.384 | 27.844 | 5.986  | 1.00 | 0.00 |
| C           |    |     |     |        |        |        |      |      |
| HETATM12891 | H2 | PRP | 908 | 21.061 | 28.089 | 6.804  | 1.00 | 0.00 |
| H           |    |     |     |        |        |        |      |      |
| HETATM12892 | H3 | PRP | 908 | 19.678 | 27.222 | 6.536  | 1.00 | 0.00 |
| H           |    |     |     |        |        |        |      |      |
| HETATM12893 | C2 | PRP | 908 | 21.122 | 27.043 | 4.897  | 1.00 | 0.00 |
| C           |    |     |     |        |        |        |      |      |
| HETATM12894 | H4 | PRP | 908 | 21.547 | 26.143 | 5.341  | 1.00 | 0.00 |
| H           |    |     |     |        |        |        |      |      |
| HETATM12895 | O2 | PRP | 908 | 22.199 | 27.867 | 4.494  | 1.00 | 0.00 |
| O           |    |     |     |        |        |        |      |      |
| HETATM12896 | H5 | PRP | 908 | 21.844 | 28.703 | 4.184  | 1.00 | 0.00 |
| H           |    |     |     |        |        |        |      |      |
| HETATM12897 | C3 | PRP | 908 | 20.282 | 26.632 | 3.673  | 1.00 | 0.00 |
| C           |    |     |     |        |        |        |      |      |
| HETATM12898 | H6 | PRP | 908 | 20.696 | 25.739 | 3.204  | 1.00 | 0.00 |
| H           |    |     |     |        |        |        |      |      |
| HETATM12899 | H7 | PRP | 908 | 19.258 | 26.435 | 3.988  | 1.00 | 0.00 |
| H           |    |     |     |        |        |        |      |      |
| HETATM12900 | H8 | PRP | 908 | 20.185 | 27.370 | 2.877  | 1.00 | 0.00 |
| H           |    |     |     |        |        |        |      |      |
| HETATM12901 | O1 | PRP | 909 | 29.116 | 33.253 | -0.280 | 1.00 | 0.00 |
| O           |    |     |     |        |        |        |      |      |
| HETATM12902 | H1 | PRP | 909 | 28.244 | 33.147 | 0.108  | 1.00 | 0.00 |
| H           |    |     |     |        |        |        |      |      |
| HETATM12903 | C1 | PRP | 909 | 30.081 | 33.644 | 0.605  | 1.00 | 0.00 |
| C           |    |     |     |        |        |        |      |      |
| HETATM12904 | H2 | PRP | 909 | 30.161 | 32.976 | 1.462  | 1.00 | 0.00 |
| H           |    |     |     |        |        |        |      |      |
| HETATM12905 | H3 | PRP | 909 | 31.043 | 33.643 | 0.093  | 1.00 | 0.00 |
| H           |    |     |     |        |        |        |      |      |
| HETATM12906 | C2 | PRP | 909 | 29.823 | 35.052 | 1.072  | 1.00 | 0.00 |
| C           |    |     |     |        |        |        |      |      |
| HETATM12907 | H4 | PRP | 909 | 28.804 | 35.283 | 1.385  | 1.00 | 0.00 |
| H           |    |     |     |        |        |        |      |      |



|             |    |     |     |        |        |        |      |      |
|-------------|----|-----|-----|--------|--------|--------|------|------|
| HETATM12908 | O2 | PRP | 909 | 30.124 | 35.997 | 0.087  | 1.00 | 0.00 |
| O           |    |     |     |        |        |        |      |      |
| HETATM12909 | H5 | PRP | 909 | 29.536 | 35.950 | -0.670 | 1.00 | 0.00 |
| H           |    |     |     |        |        |        |      |      |
| HETATM12910 | C3 | PRP | 909 | 30.724 | 35.401 | 2.248  | 1.00 | 0.00 |
| C           |    |     |     |        |        |        |      |      |
| HETATM12911 | H6 | PRP | 909 | 30.505 | 36.460 | 2.382  | 1.00 | 0.00 |
| H           |    |     |     |        |        |        |      |      |
| HETATM12912 | H7 | PRP | 909 | 30.593 | 34.798 | 3.146  | 1.00 | 0.00 |
| H           |    |     |     |        |        |        |      |      |
| HETATM12913 | H8 | PRP | 909 | 31.768 | 35.521 | 1.958  | 1.00 | 0.00 |
| H           |    |     |     |        |        |        |      |      |
| HETATM12914 | O1 | PRP | 910 | -1.344 | 15.377 | 20.579 | 1.00 | 0.00 |
| O           |    |     |     |        |        |        |      |      |
| HETATM12915 | H1 | PRP | 910 | -0.653 | 15.643 | 19.967 | 1.00 | 0.00 |
| H           |    |     |     |        |        |        |      |      |
| HETATM12916 | C1 | PRP | 910 | -2.256 | 16.469 | 20.626 | 1.00 | 0.00 |
| C           |    |     |     |        |        |        |      |      |
| HETATM12917 | H2 | PRP | 910 | -2.753 | 16.471 | 21.596 | 1.00 | 0.00 |
| H           |    |     |     |        |        |        |      |      |
| HETATM12918 | H3 | PRP | 910 | -1.705 | 17.400 | 20.486 | 1.00 | 0.00 |
| H           |    |     |     |        |        |        |      |      |
| HETATM12919 | C2 | PRP | 910 | -3.379 | 16.406 | 19.622 | 1.00 | 0.00 |
| C           |    |     |     |        |        |        |      |      |
| HETATM12920 | H4 | PRP | 910 | -3.987 | 15.532 | 19.853 | 1.00 | 0.00 |
| H           |    |     |     |        |        |        |      |      |
| HETATM12921 | O2 | PRP | 910 | -2.843 | 16.254 | 18.332 | 1.00 | 0.00 |
| O           |    |     |     |        |        |        |      |      |
| HETATM12922 | H5 | PRP | 910 | -3.053 | 17.071 | 17.874 | 1.00 | 0.00 |
| H           |    |     |     |        |        |        |      |      |
| HETATM12923 | C3 | PRP | 910 | -4.204 | 17.655 | 19.663 | 1.00 | 0.00 |
| C           |    |     |     |        |        |        |      |      |
| HETATM12924 | H6 | PRP | 910 | -5.056 | 17.626 | 18.985 | 1.00 | 0.00 |
| H           |    |     |     |        |        |        |      |      |
| HETATM12925 | H7 | PRP | 910 | -4.623 | 17.754 | 20.665 | 1.00 | 0.00 |
| H           |    |     |     |        |        |        |      |      |
| HETATM12926 | H8 | PRP | 910 | -3.608 | 18.547 | 19.468 | 1.00 | 0.00 |
| H           |    |     |     |        |        |        |      |      |
| HETATM12927 | O1 | PRP | 911 | 5.952  | 40.205 | 13.562 | 1.00 | 0.00 |
| O           |    |     |     |        |        |        |      |      |
| HETATM12928 | H1 | PRP | 911 | 6.807  | 40.569 | 13.804 | 1.00 | 0.00 |
| H           |    |     |     |        |        |        |      |      |
| HETATM12929 | C1 | PRP | 911 | 6.081  | 38.804 | 13.741 | 1.00 | 0.00 |
| C           |    |     |     |        |        |        |      |      |
| HETATM12930 | H2 | PRP | 911 | 5.279  | 38.414 | 13.113 | 1.00 | 0.00 |
| H           |    |     |     |        |        |        |      |      |
| HETATM12931 | H3 | PRP | 911 | 7.113  | 38.468 | 13.643 | 1.00 | 0.00 |
| H           |    |     |     |        |        |        |      |      |
| HETATM12932 | C2 | PRP | 911 | 5.578  | 38.460 | 15.136 | 1.00 | 0.00 |
| C           |    |     |     |        |        |        |      |      |
| HETATM12933 | H4 | PRP | 911 | 4.525  | 38.740 | 15.152 | 1.00 | 0.00 |
| H           |    |     |     |        |        |        |      |      |
| HETATM12934 | O2 | PRP | 911 | 6.405  | 39.044 | 16.124 | 1.00 | 0.00 |
| O           |    |     |     |        |        |        |      |      |
| HETATM12935 | H5 | PRP | 911 | 5.899  | 39.728 | 16.568 | 1.00 | 0.00 |
| H           |    |     |     |        |        |        |      |      |

|             |    |     |     |        |        |        |      |      |
|-------------|----|-----|-----|--------|--------|--------|------|------|
| HETATM12936 | C3 | PRP | 911 | 5.535  | 36.943 | 15.331 | 1.00 | 0.00 |
| C           |    |     |     |        |        |        |      |      |
| HETATM12937 | H6 | PRP | 911 | 6.469  | 36.421 | 15.538 | 1.00 | 0.00 |
| H           |    |     |     |        |        |        |      |      |
| HETATM12938 | H7 | PRP | 911 | 4.841  | 36.745 | 16.147 | 1.00 | 0.00 |
| H           |    |     |     |        |        |        |      |      |
| HETATM12939 | H8 | PRP | 911 | 5.031  | 36.459 | 14.495 | 1.00 | 0.00 |
| H           |    |     |     |        |        |        |      |      |
| HETATM12940 | O1 | PRP | 912 | -8.313 | 43.127 | 29.851 | 1.00 | 0.00 |
| O           |    |     |     |        |        |        |      |      |
| HETATM12941 | H1 | PRP | 912 | -8.264 | 43.811 | 30.522 | 1.00 | 0.00 |
| H           |    |     |     |        |        |        |      |      |
| HETATM12942 | C1 | PRP | 912 | -8.030 | 41.859 | 30.450 | 1.00 | 0.00 |
| C           |    |     |     |        |        |        |      |      |
| HETATM12943 | H2 | PRP | 912 | -7.163 | 42.069 | 31.076 | 1.00 | 0.00 |
| H           |    |     |     |        |        |        |      |      |
| HETATM12944 | H3 | PRP | 912 | -8.871 | 41.639 | 31.108 | 1.00 | 0.00 |
| H           |    |     |     |        |        |        |      |      |
| HETATM12945 | C2 | PRP | 912 | -7.772 | 40.764 | 29.461 | 1.00 | 0.00 |
| C           |    |     |     |        |        |        |      |      |
| HETATM12946 | H4 | PRP | 912 | -7.030 | 40.983 | 28.693 | 1.00 | 0.00 |
| H           |    |     |     |        |        |        |      |      |
| HETATM12947 | O2 | PRP | 912 | -8.936 | 40.302 | 28.873 | 1.00 | 0.00 |
| O           |    |     |     |        |        |        |      |      |
| HETATM12948 | H5 | PRP | 912 | -9.402 | 41.090 | 28.584 | 1.00 | 0.00 |
| H           |    |     |     |        |        |        |      |      |
| HETATM12949 | C3 | PRP | 912 | -7.350 | 39.412 | 30.116 | 1.00 | 0.00 |
| C           |    |     |     |        |        |        |      |      |
| HETATM12950 | H6 | PRP | 912 | -6.291 | 39.422 | 30.371 | 1.00 | 0.00 |
| H           |    |     |     |        |        |        |      |      |
| HETATM12951 | H7 | PRP | 912 | -7.951 | 39.294 | 31.018 | 1.00 | 0.00 |
| H           |    |     |     |        |        |        |      |      |
| HETATM12952 | H8 | PRP | 912 | -7.618 | 38.527 | 29.538 | 1.00 | 0.00 |
| H           |    |     |     |        |        |        |      |      |
| HETATM12953 | O1 | PRP | 913 | -7.351 | 28.084 | 10.038 | 1.00 | 0.00 |
| O           |    |     |     |        |        |        |      |      |
| HETATM12954 | H1 | PRP | 913 | -7.769 | 27.535 | 9.370  | 1.00 | 0.00 |
| H           |    |     |     |        |        |        |      |      |
| HETATM12955 | C1 | PRP | 913 | -7.112 | 29.253 | 9.338  | 1.00 | 0.00 |
| C           |    |     |     |        |        |        |      |      |
| HETATM12956 | H2 | PRP | 913 | -6.808 | 29.062 | 8.309  | 1.00 | 0.00 |
| H           |    |     |     |        |        |        |      |      |
| HETATM12957 | H3 | PRP | 913 | -8.000 | 29.879 | 9.250  | 1.00 | 0.00 |
| H           |    |     |     |        |        |        |      |      |
| HETATM12958 | C2 | PRP | 913 | -6.044 | 30.025 | 10.034 | 1.00 | 0.00 |
| C           |    |     |     |        |        |        |      |      |
| HETATM12959 | H4 | PRP | 913 | -5.170 | 29.410 | 10.250 | 1.00 | 0.00 |
| H           |    |     |     |        |        |        |      |      |
| HETATM12960 | O2 | PRP | 913 | -6.574 | 30.590 | 11.202 | 1.00 | 0.00 |
| O           |    |     |     |        |        |        |      |      |
| HETATM12961 | H5 | PRP | 913 | -7.024 | 29.873 | 11.655 | 1.00 | 0.00 |
| H           |    |     |     |        |        |        |      |      |
| HETATM12962 | C3 | PRP | 913 | -5.545 | 31.197 | 9.172  | 1.00 | 0.00 |
| C           |    |     |     |        |        |        |      |      |
| HETATM12963 | H6 | PRP | 913 | -4.786 | 30.879 | 8.457  | 1.00 | 0.00 |
| H           |    |     |     |        |        |        |      |      |

|             |    |     |     |         |        |        |      |      |
|-------------|----|-----|-----|---------|--------|--------|------|------|
| HETATM12964 | H7 | PRP | 913 | -6.373  | 31.736 | 8.712  | 1.00 | 0.00 |
| H           |    |     |     |         |        |        |      |      |
| HETATM12965 | H8 | PRP | 913 | -5.008  | 31.828 | 9.879  | 1.00 | 0.00 |
| H           |    |     |     |         |        |        |      |      |
| HETATM12966 | O1 | PRP | 914 | -1.529  | 39.143 | 22.027 | 1.00 | 0.00 |
| O           |    |     |     |         |        |        |      |      |
| HETATM12967 | H1 | PRP | 914 | -1.985  | 39.501 | 21.262 | 1.00 | 0.00 |
| H           |    |     |     |         |        |        |      |      |
| HETATM12968 | C1 | PRP | 914 | -2.020  | 39.706 | 23.242 | 1.00 | 0.00 |
| C           |    |     |     |         |        |        |      |      |
| HETATM12969 | H2 | PRP | 914 | -3.009  | 39.277 | 23.401 | 1.00 | 0.00 |
| H           |    |     |     |         |        |        |      |      |
| HETATM12970 | H3 | PRP | 914 | -1.390  | 39.352 | 24.058 | 1.00 | 0.00 |
| H           |    |     |     |         |        |        |      |      |
| HETATM12971 | C2 | PRP | 914 | -2.122  | 41.267 | 23.253 | 1.00 | 0.00 |
| C           |    |     |     |         |        |        |      |      |
| HETATM12972 | H4 | PRP | 914 | -2.296  | 41.512 | 24.301 | 1.00 | 0.00 |
| H           |    |     |     |         |        |        |      |      |
| HETATM12973 | O2 | PRP | 914 | -3.212  | 41.882 | 22.463 | 1.00 | 0.00 |
| O           |    |     |     |         |        |        |      |      |
| HETATM12974 | H5 | PRP | 914 | -4.031  | 41.843 | 22.963 | 1.00 | 0.00 |
| H           |    |     |     |         |        |        |      |      |
| HETATM12975 | C3 | PRP | 914 | -0.728  | 41.906 | 22.967 | 1.00 | 0.00 |
| C           |    |     |     |         |        |        |      |      |
| HETATM12976 | H6 | PRP | 914 | -0.183  | 41.276 | 22.264 | 1.00 | 0.00 |
| H           |    |     |     |         |        |        |      |      |
| HETATM12977 | H7 | PRP | 914 | -0.838  | 42.871 | 22.472 | 1.00 | 0.00 |
| H           |    |     |     |         |        |        |      |      |
| HETATM12978 | H8 | PRP | 914 | -0.182  | 42.125 | 23.885 | 1.00 | 0.00 |
| H           |    |     |     |         |        |        |      |      |
| HETATM12979 | O1 | PRP | 915 | -12.437 | 14.539 | 7.393  | 1.00 | 0.00 |
| O           |    |     |     |         |        |        |      |      |
| HETATM12980 | H1 | PRP | 915 | -12.576 | 15.482 | 7.277  | 1.00 | 0.00 |
| H           |    |     |     |         |        |        |      |      |
| HETATM12981 | C1 | PRP | 915 | -12.366 | 14.439 | 8.863  | 1.00 | 0.00 |
| C           |    |     |     |         |        |        |      |      |
| HETATM12982 | H2 | PRP | 915 | -11.933 | 15.356 | 9.262  | 1.00 | 0.00 |
| H           |    |     |     |         |        |        |      |      |
| HETATM12983 | H3 | PRP | 915 | -13.378 | 14.303 | 9.245  | 1.00 | 0.00 |
| H           |    |     |     |         |        |        |      |      |
| HETATM12984 | C2 | PRP | 915 | -11.710 | 13.160 | 9.230  | 1.00 | 0.00 |
| C           |    |     |     |         |        |        |      |      |
| HETATM12985 | H4 | PRP | 915 | -10.635 | 13.121 | 9.056  | 1.00 | 0.00 |
| H           |    |     |     |         |        |        |      |      |
| HETATM12986 | O2 | PRP | 915 | -12.534 | 12.150 | 8.693  | 1.00 | 0.00 |
| O           |    |     |     |         |        |        |      |      |
| HETATM12987 | H5 | PRP | 915 | -12.851 | 12.461 | 7.842  | 1.00 | 0.00 |
| H           |    |     |     |         |        |        |      |      |
| HETATM12988 | C3 | PRP | 915 | -11.859 | 13.036 | 10.752 | 1.00 | 0.00 |
| C           |    |     |     |         |        |        |      |      |
| HETATM12989 | H6 | PRP | 915 | -11.226 | 12.195 | 11.035 | 1.00 | 0.00 |
| H           |    |     |     |         |        |        |      |      |
| HETATM12990 | H7 | PRP | 915 | -11.654 | 13.987 | 11.243 | 1.00 | 0.00 |
| H           |    |     |     |         |        |        |      |      |
| HETATM12991 | H8 | PRP | 915 | -12.877 | 12.725 | 10.987 | 1.00 | 0.00 |
| H           |    |     |     |         |        |        |      |      |

|             |    |     |     |        |        |        |      |      |
|-------------|----|-----|-----|--------|--------|--------|------|------|
| HETATM12992 | O1 | PRP | 916 | 0.465  | 25.205 | 19.659 | 1.00 | 0.00 |
| O           |    |     |     |        |        |        |      |      |
| HETATM12993 | H1 | PRP | 916 | 1.366  | 25.176 | 19.989 | 1.00 | 0.00 |
| H           |    |     |     |        |        |        |      |      |
| HETATM12994 | C1 | PRP | 916 | 0.343  | 26.298 | 18.809 | 1.00 | 0.00 |
| C           |    |     |     |        |        |        |      |      |
| HETATM12995 | H2 | PRP | 916 | 0.848  | 26.056 | 17.874 | 1.00 | 0.00 |
| H           |    |     |     |        |        |        |      |      |
| HETATM12996 | H3 | PRP | 916 | -0.691 | 26.436 | 18.492 | 1.00 | 0.00 |
| H           |    |     |     |        |        |        |      |      |
| HETATM12997 | C2 | PRP | 916 | 0.873  | 27.703 | 19.305 | 1.00 | 0.00 |
| C           |    |     |     |        |        |        |      |      |
| HETATM12998 | H4 | PRP | 916 | 0.385  | 28.472 | 18.707 | 1.00 | 0.00 |
| H           |    |     |     |        |        |        |      |      |
| HETATM12999 | O2 | PRP | 916 | 2.230  | 27.697 | 18.888 | 1.00 | 0.00 |
| O           |    |     |     |        |        |        |      |      |
| HETATM13000 | H5 | PRP | 916 | 2.404  | 27.438 | 17.981 | 1.00 | 0.00 |
| H           |    |     |     |        |        |        |      |      |
| HETATM13001 | C3 | PRP | 916 | 0.778  | 27.781 | 20.851 | 1.00 | 0.00 |
| C           |    |     |     |        |        |        |      |      |
| HETATM13002 | H6 | PRP | 916 | 0.689  | 28.827 | 21.146 | 1.00 | 0.00 |
| H           |    |     |     |        |        |        |      |      |
| HETATM13003 | H7 | PRP | 916 | -0.057 | 27.186 | 21.222 | 1.00 | 0.00 |
| H           |    |     |     |        |        |        |      |      |
| HETATM13004 | H8 | PRP | 916 | 1.740  | 27.421 | 21.213 | 1.00 | 0.00 |
| H           |    |     |     |        |        |        |      |      |
| HETATM13005 | O1 | PRP | 917 | 2.308  | 28.248 | 13.045 | 1.00 | 0.00 |
| O           |    |     |     |        |        |        |      |      |
| HETATM13006 | H1 | PRP | 917 | 3.091  | 28.487 | 12.543 | 1.00 | 0.00 |
| H           |    |     |     |        |        |        |      |      |
| HETATM13007 | C1 | PRP | 917 | 2.350  | 26.999 | 13.794 | 1.00 | 0.00 |
| C           |    |     |     |        |        |        |      |      |
| HETATM13008 | H2 | PRP | 917 | 2.412  | 26.225 | 13.029 | 1.00 | 0.00 |
| H           |    |     |     |        |        |        |      |      |
| HETATM13009 | H3 | PRP | 917 | 3.331  | 26.940 | 14.265 | 1.00 | 0.00 |
| H           |    |     |     |        |        |        |      |      |
| HETATM13010 | C2 | PRP | 917 | 1.269  | 26.692 | 14.870 | 1.00 | 0.00 |
| C           |    |     |     |        |        |        |      |      |
| HETATM13011 | H4 | PRP | 917 | 0.292  | 26.706 | 14.385 | 1.00 | 0.00 |
| H           |    |     |     |        |        |        |      |      |
| HETATM13012 | O2 | PRP | 917 | 1.332  | 27.624 | 15.941 | 1.00 | 0.00 |
| O           |    |     |     |        |        |        |      |      |
| HETATM13013 | H5 | PRP | 917 | 0.892  | 28.432 | 15.667 | 1.00 | 0.00 |
| H           |    |     |     |        |        |        |      |      |
| HETATM13014 | C3 | PRP | 917 | 1.453  | 25.314 | 15.502 | 1.00 | 0.00 |
| C           |    |     |     |        |        |        |      |      |
| HETATM13015 | H6 | PRP | 917 | 2.212  | 24.812 | 14.900 | 1.00 | 0.00 |
| H           |    |     |     |        |        |        |      |      |
| HETATM13016 | H7 | PRP | 917 | 1.988  | 25.466 | 16.439 | 1.00 | 0.00 |
| H           |    |     |     |        |        |        |      |      |
| HETATM13017 | H8 | PRP | 917 | 0.506  | 24.777 | 15.548 | 1.00 | 0.00 |
| H           |    |     |     |        |        |        |      |      |
| HETATM13018 | O1 | PRP | 918 | 17.734 | 31.185 | 14.019 | 1.00 | 0.00 |
| O           |    |     |     |        |        |        |      |      |
| HETATM13019 | H1 | PRP | 918 | 17.480 | 31.782 | 13.311 | 1.00 | 0.00 |
| H           |    |     |     |        |        |        |      |      |

|             |    |     |     |        |        |        |      |      |
|-------------|----|-----|-----|--------|--------|--------|------|------|
| HETATM13020 | C1 | PRP | 918 | 16.830 | 31.309 | 15.145 | 1.00 | 0.00 |
| C           |    |     |     |        |        |        |      |      |
| HETATM13021 | H2 | PRP | 918 | 15.851 | 31.626 | 14.785 | 1.00 | 0.00 |
| H           |    |     |     |        |        |        |      |      |
| HETATM13022 | H3 | PRP | 918 | 16.757 | 30.314 | 15.583 | 1.00 | 0.00 |
| H           |    |     |     |        |        |        |      |      |
| HETATM13023 | C2 | PRP | 918 | 17.130 | 32.338 | 16.322 | 1.00 | 0.00 |
| C           |    |     |     |        |        |        |      |      |
| HETATM13024 | H4 | PRP | 918 | 17.179 | 33.383 | 16.018 | 1.00 | 0.00 |
| H           |    |     |     |        |        |        |      |      |
| HETATM13025 | O2 | PRP | 918 | 18.458 | 31.931 | 16.794 | 1.00 | 0.00 |
| O           |    |     |     |        |        |        |      |      |
| HETATM13026 | H5 | PRP | 918 | 18.638 | 30.998 | 16.655 | 1.00 | 0.00 |
| H           |    |     |     |        |        |        |      |      |
| HETATM13027 | C3 | PRP | 918 | 16.031 | 32.176 | 17.359 | 1.00 | 0.00 |
| C           |    |     |     |        |        |        |      |      |
| HETATM13028 | H6 | PRP | 918 | 15.893 | 31.118 | 17.583 | 1.00 | 0.00 |
| H           |    |     |     |        |        |        |      |      |
| HETATM13029 | H7 | PRP | 918 | 16.295 | 32.666 | 18.296 | 1.00 | 0.00 |
| H           |    |     |     |        |        |        |      |      |
| HETATM13030 | H8 | PRP | 918 | 15.229 | 32.665 | 16.808 | 1.00 | 0.00 |
| H           |    |     |     |        |        |        |      |      |
| HETATM13031 | O1 | PRP | 919 | 2.753  | 42.344 | 9.602  | 1.00 | 0.00 |
| O           |    |     |     |        |        |        |      |      |
| HETATM13032 | H1 | PRP | 919 | 2.905  | 42.589 | 10.518 | 1.00 | 0.00 |
| H           |    |     |     |        |        |        |      |      |
| HETATM13033 | C1 | PRP | 919 | 3.962  | 41.775 | 9.292  | 1.00 | 0.00 |
| C           |    |     |     |        |        |        |      |      |
| HETATM13034 | H2 | PRP | 919 | 4.029  | 41.301 | 8.313  | 1.00 | 0.00 |
| H           |    |     |     |        |        |        |      |      |
| HETATM13035 | H3 | PRP | 919 | 4.640  | 42.616 | 9.146  | 1.00 | 0.00 |
| H           |    |     |     |        |        |        |      |      |
| HETATM13036 | C2 | PRP | 919 | 4.457  | 40.848 | 10.409 | 1.00 | 0.00 |
| C           |    |     |     |        |        |        |      |      |
| HETATM13037 | H4 | PRP | 919 | 3.907  | 39.909 | 10.345 | 1.00 | 0.00 |
| H           |    |     |     |        |        |        |      |      |
| HETATM13038 | O2 | PRP | 919 | 4.295  | 41.496 | 11.670 | 1.00 | 0.00 |
| O           |    |     |     |        |        |        |      |      |
| HETATM13039 | H5 | PRP | 919 | 4.462  | 40.900 | 12.404 | 1.00 | 0.00 |
| H           |    |     |     |        |        |        |      |      |
| HETATM13040 | C3 | PRP | 919 | 5.950  | 40.550 | 10.224 | 1.00 | 0.00 |
| C           |    |     |     |        |        |        |      |      |
| HETATM13041 | H6 | PRP | 919 | 6.231  | 39.712 | 10.862 | 1.00 | 0.00 |
| H           |    |     |     |        |        |        |      |      |
| HETATM13042 | H7 | PRP | 919 | 6.196  | 40.309 | 9.190  | 1.00 | 0.00 |
| H           |    |     |     |        |        |        |      |      |
| HETATM13043 | H8 | PRP | 919 | 6.464  | 41.435 | 10.602 | 1.00 | 0.00 |
| H           |    |     |     |        |        |        |      |      |
| HETATM13044 | O1 | PRP | 920 | 6.765  | 45.861 | 12.235 | 1.00 | 0.00 |
| O           |    |     |     |        |        |        |      |      |
| HETATM13045 | H1 | PRP | 920 | 6.323  | 46.656 | 12.542 | 1.00 | 0.00 |
| H           |    |     |     |        |        |        |      |      |
| HETATM13046 | C1 | PRP | 920 | 5.809  | 44.883 | 11.874 | 1.00 | 0.00 |
| C           |    |     |     |        |        |        |      |      |
| HETATM13047 | H2 | PRP | 920 | 6.325  | 44.084 | 11.342 | 1.00 | 0.00 |
| H           |    |     |     |        |        |        |      |      |

|             |    |     |     |        |        |        |      |      |
|-------------|----|-----|-----|--------|--------|--------|------|------|
| HETATM13048 | H3 | PRP | 920 | 5.354  | 44.524 | 12.797 | 1.00 | 0.00 |
| H           |    |     |     |        |        |        |      |      |
| HETATM13049 | C2 | PRP | 920 | 4.750  | 45.470 | 10.893 | 1.00 | 0.00 |
| C           |    |     |     |        |        |        |      |      |
| HETATM13050 | H4 | PRP | 920 | 4.107  | 44.670 | 10.529 | 1.00 | 0.00 |
| H           |    |     |     |        |        |        |      |      |
| HETATM13051 | O2 | PRP | 920 | 5.328  | 45.827 | 9.618  | 1.00 | 0.00 |
| O           |    |     |     |        |        |        |      |      |
| HETATM13052 | H5 | PRP | 920 | 6.238  | 46.050 | 9.827  | 1.00 | 0.00 |
| H           |    |     |     |        |        |        |      |      |
| HETATM13053 | C3 | PRP | 920 | 4.048  | 46.634 | 11.536 | 1.00 | 0.00 |
| C           |    |     |     |        |        |        |      |      |
| HETATM13054 | H6 | PRP | 920 | 4.767  | 47.393 | 11.843 | 1.00 | 0.00 |
| H           |    |     |     |        |        |        |      |      |
| HETATM13055 | H7 | PRP | 920 | 3.455  | 47.103 | 10.751 | 1.00 | 0.00 |
| H           |    |     |     |        |        |        |      |      |
| HETATM13056 | H8 | PRP | 920 | 3.506  | 46.243 | 12.397 | 1.00 | 0.00 |
| H           |    |     |     |        |        |        |      |      |
| HETATM13057 | O1 | PRP | 921 | 15.605 | 48.768 | 13.785 | 1.00 | 0.00 |
| O           |    |     |     |        |        |        |      |      |
| HETATM13058 | H1 | PRP | 921 | 15.092 | 48.113 | 13.305 | 1.00 | 0.00 |
| H           |    |     |     |        |        |        |      |      |
| HETATM13059 | C1 | PRP | 921 | 15.931 | 48.219 | 15.010 | 1.00 | 0.00 |
| C           |    |     |     |        |        |        |      |      |
| HETATM13060 | H2 | PRP | 921 | 16.274 | 49.047 | 15.630 | 1.00 | 0.00 |
| H           |    |     |     |        |        |        |      |      |
| HETATM13061 | H3 | PRP | 921 | 15.083 | 47.784 | 15.538 | 1.00 | 0.00 |
| H           |    |     |     |        |        |        |      |      |
| HETATM13062 | C2 | PRP | 921 | 16.973 | 47.137 | 14.866 | 1.00 | 0.00 |
| C           |    |     |     |        |        |        |      |      |
| HETATM13063 | H4 | PRP | 921 | 17.865 | 47.703 | 14.595 | 1.00 | 0.00 |
| H           |    |     |     |        |        |        |      |      |
| HETATM13064 | O2 | PRP | 921 | 16.678 | 46.143 | 13.925 | 1.00 | 0.00 |
| O           |    |     |     |        |        |        |      |      |
| HETATM13065 | H5 | PRP | 921 | 17.518 | 45.680 | 13.902 | 1.00 | 0.00 |
| H           |    |     |     |        |        |        |      |      |
| HETATM13066 | C3 | PRP | 921 | 17.286 | 46.461 | 16.231 | 1.00 | 0.00 |
| C           |    |     |     |        |        |        |      |      |
| HETATM13067 | H6 | PRP | 921 | 18.033 | 45.690 | 16.043 | 1.00 | 0.00 |
| H           |    |     |     |        |        |        |      |      |
| HETATM13068 | H7 | PRP | 921 | 17.837 | 47.065 | 16.952 | 1.00 | 0.00 |
| H           |    |     |     |        |        |        |      |      |
| HETATM13069 | H8 | PRP | 921 | 16.398 | 46.028 | 16.691 | 1.00 | 0.00 |
| H           |    |     |     |        |        |        |      |      |
| HETATM13070 | O1 | PRP | 922 | -2.049 | 36.580 | 11.215 | 1.00 | 0.00 |
| O           |    |     |     |        |        |        |      |      |
| HETATM13071 | H1 | PRP | 922 | -2.841 | 37.001 | 11.557 | 1.00 | 0.00 |
| H           |    |     |     |        |        |        |      |      |
| HETATM13072 | C1 | PRP | 922 | -2.424 | 35.413 | 10.522 | 1.00 | 0.00 |
| C           |    |     |     |        |        |        |      |      |
| HETATM13073 | H2 | PRP | 922 | -3.065 | 34.834 | 11.187 | 1.00 | 0.00 |
| H           |    |     |     |        |        |        |      |      |
| HETATM13074 | H3 | PRP | 922 | -3.001 | 35.652 | 9.628  | 1.00 | 0.00 |
| H           |    |     |     |        |        |        |      |      |
| HETATM13075 | C2 | PRP | 922 | -1.257 | 34.595 | 9.981  | 1.00 | 0.00 |
| C           |    |     |     |        |        |        |      |      |

|             |    |     |     |        |        |        |      |      |
|-------------|----|-----|-----|--------|--------|--------|------|------|
| HETATM13076 | H4 | PRP | 922 | -0.753 | 34.172 | 10.850 | 1.00 | 0.00 |
| H           |    |     |     |        |        |        |      |      |
| HETATM13077 | O2 | PRP | 922 | -0.479 | 35.362 | 9.106  | 1.00 | 0.00 |
| O           |    |     |     |        |        |        |      |      |
| HETATM13078 | H5 | PRP | 922 | -0.273 | 36.210 | 9.505  | 1.00 | 0.00 |
| H           |    |     |     |        |        |        |      |      |
| HETATM13079 | C3 | PRP | 922 | -1.968 | 33.519 | 9.212  | 1.00 | 0.00 |
| C           |    |     |     |        |        |        |      |      |
| HETATM13080 | H6 | PRP | 922 | -2.673 | 33.008 | 9.869  | 1.00 | 0.00 |
| H           |    |     |     |        |        |        |      |      |
| HETATM13081 | H7 | PRP | 922 | -2.551 | 33.941 | 8.393  | 1.00 | 0.00 |
| H           |    |     |     |        |        |        |      |      |
| HETATM13082 | H8 | PRP | 922 | -1.267 | 32.827 | 8.746  | 1.00 | 0.00 |
| H           |    |     |     |        |        |        |      |      |
| HETATM13083 | O1 | PRP | 923 | 8.057  | 35.799 | 13.277 | 1.00 | 0.00 |
| O           |    |     |     |        |        |        |      |      |
| HETATM13084 | H1 | PRP | 923 | 8.281  | 36.403 | 12.565 | 1.00 | 0.00 |
| H           |    |     |     |        |        |        |      |      |
| HETATM13085 | C1 | PRP | 923 | 8.925  | 36.125 | 14.308 | 1.00 | 0.00 |
| C           |    |     |     |        |        |        |      |      |
| HETATM13086 | H2 | PRP | 923 | 8.674  | 37.055 | 14.817 | 1.00 | 0.00 |
| H           |    |     |     |        |        |        |      |      |
| HETATM13087 | H3 | PRP | 923 | 9.075  | 35.439 | 15.142 | 1.00 | 0.00 |
| H           |    |     |     |        |        |        |      |      |
| HETATM13088 | C2 | PRP | 923 | 10.366 | 36.450 | 13.744 | 1.00 | 0.00 |
| C           |    |     |     |        |        |        |      |      |
| HETATM13089 | H4 | PRP | 923 | 10.997 | 36.589 | 14.622 | 1.00 | 0.00 |
| H           |    |     |     |        |        |        |      |      |
| HETATM13090 | O2 | PRP | 923 | 10.249 | 37.692 | 13.084 | 1.00 | 0.00 |
| O           |    |     |     |        |        |        |      |      |
| HETATM13091 | H5 | PRP | 923 | 11.115 | 37.978 | 12.782 | 1.00 | 0.00 |
| H           |    |     |     |        |        |        |      |      |
| HETATM13092 | C3 | PRP | 923 | 10.912 | 35.409 | 12.736 | 1.00 | 0.00 |
| C           |    |     |     |        |        |        |      |      |
| HETATM13093 | H6 | PRP | 923 | 11.514 | 34.689 | 13.291 | 1.00 | 0.00 |
| H           |    |     |     |        |        |        |      |      |
| HETATM13094 | H7 | PRP | 923 | 10.094 | 34.939 | 12.190 | 1.00 | 0.00 |
| H           |    |     |     |        |        |        |      |      |
| HETATM13095 | H8 | PRP | 923 | 11.736 | 35.813 | 12.148 | 1.00 | 0.00 |
| H           |    |     |     |        |        |        |      |      |
| HETATM13096 | O1 | PRP | 924 | 7.485  | 43.990 | 21.881 | 1.00 | 0.00 |
| O           |    |     |     |        |        |        |      |      |
| HETATM13097 | H1 | PRP | 924 | 7.588  | 44.198 | 22.813 | 1.00 | 0.00 |
| H           |    |     |     |        |        |        |      |      |
| HETATM13098 | C1 | PRP | 924 | 8.768  | 43.713 | 21.275 | 1.00 | 0.00 |
| C           |    |     |     |        |        |        |      |      |
| HETATM13099 | H2 | PRP | 924 | 8.593  | 43.386 | 20.250 | 1.00 | 0.00 |
| H           |    |     |     |        |        |        |      |      |
| HETATM13100 | H3 | PRP | 924 | 9.394  | 44.582 | 21.074 | 1.00 | 0.00 |
| H           |    |     |     |        |        |        |      |      |
| HETATM13101 | C2 | PRP | 924 | 9.538  | 42.607 | 22.016 | 1.00 | 0.00 |
| C           |    |     |     |        |        |        |      |      |
| HETATM13102 | H4 | PRP | 924 | 8.859  | 41.834 | 22.376 | 1.00 | 0.00 |
| H           |    |     |     |        |        |        |      |      |
| HETATM13103 | O2 | PRP | 924 | 10.292 | 43.203 | 23.097 | 1.00 | 0.00 |
| O           |    |     |     |        |        |        |      |      |

|             |    |     |     |        |        |        |      |      |
|-------------|----|-----|-----|--------|--------|--------|------|------|
| HETATM13104 | H5 | PRP | 924 | 9.669  | 43.714 | 23.620 | 1.00 | 0.00 |
| H           |    |     |     |        |        |        |      |      |
| HETATM13105 | C3 | PRP | 924 | 10.545 | 41.966 | 20.980 | 1.00 | 0.00 |
| C           |    |     |     |        |        |        |      |      |
| HETATM13106 | H6 | PRP | 924 | 11.050 | 41.110 | 21.427 | 1.00 | 0.00 |
| H           |    |     |     |        |        |        |      |      |
| HETATM13107 | H7 | PRP | 924 | 10.004 | 41.754 | 20.058 | 1.00 | 0.00 |
| H           |    |     |     |        |        |        |      |      |
| HETATM13108 | H8 | PRP | 924 | 11.348 | 42.648 | 20.699 | 1.00 | 0.00 |
| H           |    |     |     |        |        |        |      |      |
| HETATM13109 | O1 | PRP | 925 | 19.395 | 45.673 | 13.237 | 1.00 | 0.00 |
| O           |    |     |     |        |        |        |      |      |
| HETATM13110 | H1 | PRP | 925 | 20.171 | 46.235 | 13.298 | 1.00 | 0.00 |
| H           |    |     |     |        |        |        |      |      |
| HETATM13111 | C1 | PRP | 925 | 19.337 | 44.980 | 12.038 | 1.00 | 0.00 |
| C           |    |     |     |        |        |        |      |      |
| HETATM13112 | H2 | PRP | 925 | 20.356 | 44.754 | 11.725 | 1.00 | 0.00 |
| H           |    |     |     |        |        |        |      |      |
| HETATM13113 | H3 | PRP | 925 | 18.837 | 44.011 | 12.041 | 1.00 | 0.00 |
| H           |    |     |     |        |        |        |      |      |
| HETATM13114 | C2 | PRP | 925 | 18.604 | 45.756 | 10.960 | 1.00 | 0.00 |
| C           |    |     |     |        |        |        |      |      |
| HETATM13115 | H4 | PRP | 925 | 18.837 | 46.799 | 11.175 | 1.00 | 0.00 |
| H           |    |     |     |        |        |        |      |      |
| HETATM13116 | O2 | PRP | 925 | 17.160 | 45.651 | 11.022 | 1.00 | 0.00 |
| O           |    |     |     |        |        |        |      |      |
| HETATM13117 | H5 | PRP | 925 | 16.866 | 45.827 | 11.919 | 1.00 | 0.00 |
| H           |    |     |     |        |        |        |      |      |
| HETATM13118 | C3 | PRP | 925 | 19.098 | 45.275 | 9.613  | 1.00 | 0.00 |
| C           |    |     |     |        |        |        |      |      |
| HETATM13119 | H6 | PRP | 925 | 18.448 | 44.497 | 9.213  | 1.00 | 0.00 |
| H           |    |     |     |        |        |        |      |      |
| HETATM13120 | H7 | PRP | 925 | 18.968 | 46.082 | 8.892  | 1.00 | 0.00 |
| H           |    |     |     |        |        |        |      |      |
| HETATM13121 | H8 | PRP | 925 | 20.177 | 45.123 | 9.585  | 1.00 | 0.00 |
| H           |    |     |     |        |        |        |      |      |
| HETATM13122 | O1 | PRP | 926 | 3.322  | 8.348  | 31.465 | 1.00 | 0.00 |
| O           |    |     |     |        |        |        |      |      |
| HETATM13123 | H1 | PRP | 926 | 2.531  | 8.394  | 30.923 | 1.00 | 0.00 |
| H           |    |     |     |        |        |        |      |      |
| HETATM13124 | C1 | PRP | 926 | 4.267  | 9.039  | 30.667 | 1.00 | 0.00 |
| C           |    |     |     |        |        |        |      |      |
| HETATM13125 | H2 | PRP | 926 | 4.805  | 9.782  | 31.257 | 1.00 | 0.00 |
| H           |    |     |     |        |        |        |      |      |
| HETATM13126 | H3 | PRP | 926 | 4.938  | 8.336  | 30.174 | 1.00 | 0.00 |
| H           |    |     |     |        |        |        |      |      |
| HETATM13127 | C2 | PRP | 926 | 3.485  | 9.795  | 29.589 | 1.00 | 0.00 |
| C           |    |     |     |        |        |        |      |      |
| HETATM13128 | H4 | PRP | 926 | 2.699  | 10.298 | 30.152 | 1.00 | 0.00 |
| H           |    |     |     |        |        |        |      |      |
| HETATM13129 | O2 | PRP | 926 | 2.795  | 8.872  | 28.641 | 1.00 | 0.00 |
| O           |    |     |     |        |        |        |      |      |
| HETATM13130 | H5 | PRP | 926 | 3.475  | 8.232  | 28.416 | 1.00 | 0.00 |
| H           |    |     |     |        |        |        |      |      |
| HETATM13131 | C3 | PRP | 926 | 4.328  | 10.830 | 28.820 | 1.00 | 0.00 |
| C           |    |     |     |        |        |        |      |      |



|             |    |     |     |        |        |        |      |      |
|-------------|----|-----|-----|--------|--------|--------|------|------|
| HETATM13132 | H6 | PRP | 926 | 4.825  | 10.238 | 28.051 | 1.00 | 0.00 |
| H           |    |     |     |        |        |        |      |      |
| HETATM13133 | H7 | PRP | 926 | 3.628  | 11.599 | 28.493 | 1.00 | 0.00 |
| H           |    |     |     |        |        |        |      |      |
| HETATM13134 | H8 | PRP | 926 | 5.114  | 11.208 | 29.473 | 1.00 | 0.00 |
| H           |    |     |     |        |        |        |      |      |
| HETATM13135 | O1 | PRP | 927 | 2.188  | 16.744 | 6.921  | 1.00 | 0.00 |
| O           |    |     |     |        |        |        |      |      |
| HETATM13136 | H1 | PRP | 927 | 3.033  | 16.464 | 6.563  | 1.00 | 0.00 |
| H           |    |     |     |        |        |        |      |      |
| HETATM13137 | C1 | PRP | 927 | 2.353  | 16.910 | 8.383  | 1.00 | 0.00 |
| C           |    |     |     |        |        |        |      |      |
| HETATM13138 | H2 | PRP | 927 | 3.186  | 17.572 | 8.620  | 1.00 | 0.00 |
| H           |    |     |     |        |        |        |      |      |
| HETATM13139 | H3 | PRP | 927 | 1.436  | 17.344 | 8.782  | 1.00 | 0.00 |
| H           |    |     |     |        |        |        |      |      |
| HETATM13140 | C2 | PRP | 927 | 2.800  | 15.602 | 9.072  | 1.00 | 0.00 |
| C           |    |     |     |        |        |        |      |      |
| HETATM13141 | H4 | PRP | 927 | 2.801  | 15.852 | 10.133 | 1.00 | 0.00 |
| H           |    |     |     |        |        |        |      |      |
| HETATM13142 | O2 | PRP | 927 | 4.107  | 15.385 | 8.572  | 1.00 | 0.00 |
| O           |    |     |     |        |        |        |      |      |
| HETATM13143 | H5 | PRP | 927 | 4.660  | 14.923 | 9.206  | 1.00 | 0.00 |
| H           |    |     |     |        |        |        |      |      |
| HETATM13144 | C3 | PRP | 927 | 1.858  | 14.399 | 8.954  | 1.00 | 0.00 |
| C           |    |     |     |        |        |        |      |      |
| HETATM13145 | H6 | PRP | 927 | 1.931  | 14.032 | 7.930  | 1.00 | 0.00 |
| H           |    |     |     |        |        |        |      |      |
| HETATM13146 | H7 | PRP | 927 | 2.199  | 13.603 | 9.616  | 1.00 | 0.00 |
| H           |    |     |     |        |        |        |      |      |
| HETATM13147 | H8 | PRP | 927 | 0.817  | 14.559 | 9.235  | 1.00 | 0.00 |
| H           |    |     |     |        |        |        |      |      |
| HETATM13148 | O1 | PRP | 928 | 13.906 | 32.080 | 1.785  | 1.00 | 0.00 |
| O           |    |     |     |        |        |        |      |      |
| HETATM13149 | H1 | PRP | 928 | 13.075 | 32.081 | 1.305  | 1.00 | 0.00 |
| H           |    |     |     |        |        |        |      |      |
| HETATM13150 | C1 | PRP | 928 | 13.564 | 32.360 | 3.109  | 1.00 | 0.00 |
| C           |    |     |     |        |        |        |      |      |
| HETATM13151 | H2 | PRP | 928 | 13.069 | 31.537 | 3.624  | 1.00 | 0.00 |
| H           |    |     |     |        |        |        |      |      |
| HETATM13152 | H3 | PRP | 928 | 14.470 | 32.569 | 3.678  | 1.00 | 0.00 |
| H           |    |     |     |        |        |        |      |      |
| HETATM13153 | C2 | PRP | 928 | 12.600 | 33.546 | 3.280  | 1.00 | 0.00 |
| C           |    |     |     |        |        |        |      |      |
| HETATM13154 | H4 | PRP | 928 | 12.258 | 33.563 | 4.315  | 1.00 | 0.00 |
| H           |    |     |     |        |        |        |      |      |
| HETATM13155 | O2 | PRP | 928 | 11.441 | 33.332 | 2.442  | 1.00 | 0.00 |
| O           |    |     |     |        |        |        |      |      |
| HETATM13156 | H5 | PRP | 928 | 10.652 | 33.139 | 2.954  | 1.00 | 0.00 |
| H           |    |     |     |        |        |        |      |      |
| HETATM13157 | C3 | PRP | 928 | 13.279 | 34.814 | 2.834  | 1.00 | 0.00 |
| C           |    |     |     |        |        |        |      |      |
| HETATM13158 | H6 | PRP | 928 | 14.080 | 34.901 | 3.568  | 1.00 | 0.00 |
| H           |    |     |     |        |        |        |      |      |
| HETATM13159 | H7 | PRP | 928 | 13.714 | 34.719 | 1.839  | 1.00 | 0.00 |
| H           |    |     |     |        |        |        |      |      |

|             |    |     |     |        |        |        |      |      |
|-------------|----|-----|-----|--------|--------|--------|------|------|
| HETATM13160 | H8 | PRP | 928 | 12.646 | 35.688 | 2.985  | 1.00 | 0.00 |
| H           |    |     |     |        |        |        |      |      |
| HETATM13161 | O1 | PRP | 929 | 12.169 | 45.286 | 11.162 | 1.00 | 0.00 |
| O           |    |     |     |        |        |        |      |      |
| HETATM13162 | H1 | PRP | 929 | 11.734 | 44.676 | 11.761 | 1.00 | 0.00 |
| H           |    |     |     |        |        |        |      |      |
| HETATM13163 | C1 | PRP | 929 | 11.646 | 46.626 | 11.277 | 1.00 | 0.00 |
| C           |    |     |     |        |        |        |      |      |
| HETATM13164 | H2 | PRP | 929 | 11.743 | 47.272 | 10.405 | 1.00 | 0.00 |
| H           |    |     |     |        |        |        |      |      |
| HETATM13165 | H3 | PRP | 929 | 10.607 | 46.532 | 11.594 | 1.00 | 0.00 |
| H           |    |     |     |        |        |        |      |      |
| HETATM13166 | C2 | PRP | 929 | 12.470 | 47.347 | 12.385 | 1.00 | 0.00 |
| C           |    |     |     |        |        |        |      |      |
| HETATM13167 | H4 | PRP | 929 | 12.108 | 48.360 | 12.562 | 1.00 | 0.00 |
| H           |    |     |     |        |        |        |      |      |
| HETATM13168 | O2 | PRP | 929 | 13.778 | 47.488 | 11.938 | 1.00 | 0.00 |
| O           |    |     |     |        |        |        |      |      |
| HETATM13169 | H5 | PRP | 929 | 13.833 | 46.810 | 11.261 | 1.00 | 0.00 |
| H           |    |     |     |        |        |        |      |      |
| HETATM13170 | C3 | PRP | 929 | 12.361 | 46.561 | 13.696 | 1.00 | 0.00 |
| C           |    |     |     |        |        |        |      |      |
| HETATM13171 | H6 | PRP | 929 | 11.384 | 46.096 | 13.826 | 1.00 | 0.00 |
| H           |    |     |     |        |        |        |      |      |
| HETATM13172 | H7 | PRP | 929 | 13.182 | 45.857 | 13.835 | 1.00 | 0.00 |
| H           |    |     |     |        |        |        |      |      |
| HETATM13173 | H8 | PRP | 929 | 12.572 | 47.246 | 14.517 | 1.00 | 0.00 |
| H           |    |     |     |        |        |        |      |      |
| HETATM13174 | O1 | PRP | 930 | -2.404 | 36.396 | 5.832  | 1.00 | 0.00 |
| O           |    |     |     |        |        |        |      |      |
| HETATM13175 | H1 | PRP | 930 | -1.568 | 36.213 | 6.267  | 1.00 | 0.00 |
| H           |    |     |     |        |        |        |      |      |
| HETATM13176 | C1 | PRP | 930 | -2.141 | 37.399 | 4.866  | 1.00 | 0.00 |
| C           |    |     |     |        |        |        |      |      |
| HETATM13177 | H2 | PRP | 930 | -2.105 | 38.380 | 5.339  | 1.00 | 0.00 |
| H           |    |     |     |        |        |        |      |      |
| HETATM13178 | H3 | PRP | 930 | -1.278 | 37.067 | 4.288  | 1.00 | 0.00 |
| H           |    |     |     |        |        |        |      |      |
| HETATM13179 | C2 | PRP | 930 | -3.269 | 37.563 | 3.795  | 1.00 | 0.00 |
| C           |    |     |     |        |        |        |      |      |
| HETATM13180 | H4 | PRP | 930 | -2.789 | 38.302 | 3.153  | 1.00 | 0.00 |
| H           |    |     |     |        |        |        |      |      |
| HETATM13181 | O2 | PRP | 930 | -4.479 | 38.061 | 4.324  | 1.00 | 0.00 |
| O           |    |     |     |        |        |        |      |      |
| HETATM13182 | H5 | PRP | 930 | -4.922 | 37.218 | 4.444  | 1.00 | 0.00 |
| H           |    |     |     |        |        |        |      |      |
| HETATM13183 | C3 | PRP | 930 | -3.547 | 36.284 | 2.991  | 1.00 | 0.00 |
| C           |    |     |     |        |        |        |      |      |
| HETATM13184 | H6 | PRP | 930 | -4.268 | 36.447 | 2.190  | 1.00 | 0.00 |
| H           |    |     |     |        |        |        |      |      |
| HETATM13185 | H7 | PRP | 930 | -2.562 | 36.052 | 2.586  | 1.00 | 0.00 |
| H           |    |     |     |        |        |        |      |      |
| HETATM13186 | H8 | PRP | 930 | -3.878 | 35.539 | 3.715  | 1.00 | 0.00 |
| H           |    |     |     |        |        |        |      |      |
| HETATM13187 | O1 | PRP | 931 | -3.809 | 17.904 | 16.310 | 1.00 | 0.00 |
| O           |    |     |     |        |        |        |      |      |

|             |    |     |     |        |        |        |      |      |
|-------------|----|-----|-----|--------|--------|--------|------|------|
| HETATM13188 | H1 | PRP | 931 | -4.317 | 17.793 | 15.503 | 1.00 | 0.00 |
| H           |    |     |     |        |        |        |      |      |
| HETATM13189 | C1 | PRP | 931 | -2.729 | 18.753 | 16.106 | 1.00 | 0.00 |
| C           |    |     |     |        |        |        |      |      |
| HETATM13190 | H2 | PRP | 931 | -3.060 | 19.766 | 15.876 | 1.00 | 0.00 |
| H           |    |     |     |        |        |        |      |      |
| HETATM13191 | H3 | PRP | 931 | -2.173 | 18.857 | 17.037 | 1.00 | 0.00 |
| H           |    |     |     |        |        |        |      |      |
| HETATM13192 | C2 | PRP | 931 | -1.916 | 18.297 | 14.971 | 1.00 | 0.00 |
| C           |    |     |     |        |        |        |      |      |
| HETATM13193 | H4 | PRP | 931 | -2.593 | 18.024 | 14.161 | 1.00 | 0.00 |
| H           |    |     |     |        |        |        |      |      |
| HETATM13194 | O2 | PRP | 931 | -1.099 | 17.254 | 15.513 | 1.00 | 0.00 |
| O           |    |     |     |        |        |        |      |      |
| HETATM13195 | H5 | PRP | 931 | -1.694 | 16.780 | 16.098 | 1.00 | 0.00 |
| H           |    |     |     |        |        |        |      |      |
| HETATM13196 | C3 | PRP | 931 | -1.103 | 19.502 | 14.476 | 1.00 | 0.00 |
| C           |    |     |     |        |        |        |      |      |
| HETATM13197 | H6 | PRP | 931 | -0.688 | 20.200 | 15.203 | 1.00 | 0.00 |
| H           |    |     |     |        |        |        |      |      |
| HETATM13198 | H7 | PRP | 931 | -0.258 | 19.059 | 13.950 | 1.00 | 0.00 |
| H           |    |     |     |        |        |        |      |      |
| HETATM13199 | H8 | PRP | 931 | -1.695 | 20.162 | 13.841 | 1.00 | 0.00 |
| H           |    |     |     |        |        |        |      |      |
| HETATM13200 | O1 | PRP | 932 | 9.052  | 25.928 | -0.810 | 1.00 | 0.00 |
| O           |    |     |     |        |        |        |      |      |
| HETATM13201 | H1 | PRP | 932 | 8.249  | 25.540 | -1.166 | 1.00 | 0.00 |
| H           |    |     |     |        |        |        |      |      |
| HETATM13202 | C1 | PRP | 932 | 10.059 | 24.958 | -0.808 | 1.00 | 0.00 |
| C           |    |     |     |        |        |        |      |      |
| HETATM13203 | H2 | PRP | 932 | 10.451 | 24.707 | -1.794 | 1.00 | 0.00 |
| H           |    |     |     |        |        |        |      |      |
| HETATM13204 | H3 | PRP | 932 | 10.942 | 25.302 | -0.269 | 1.00 | 0.00 |
| H           |    |     |     |        |        |        |      |      |
| HETATM13205 | C2 | PRP | 932 | 9.516  | 23.655 | -0.148 | 1.00 | 0.00 |
| C           |    |     |     |        |        |        |      |      |
| HETATM13206 | H4 | PRP | 932 | 10.246 | 22.859 | -0.296 | 1.00 | 0.00 |
| H           |    |     |     |        |        |        |      |      |
| HETATM13207 | O2 | PRP | 932 | 8.257  | 23.333 | -0.768 | 1.00 | 0.00 |
| O           |    |     |     |        |        |        |      |      |
| HETATM13208 | H5 | PRP | 932 | 8.405  | 22.907 | -1.616 | 1.00 | 0.00 |
| H           |    |     |     |        |        |        |      |      |
| HETATM13209 | C3 | PRP | 932 | 9.297  | 23.830 | 1.327  | 1.00 | 0.00 |
| C           |    |     |     |        |        |        |      |      |
| HETATM13210 | H6 | PRP | 932 | 8.306  | 23.438 | 1.557  | 1.00 | 0.00 |
| H           |    |     |     |        |        |        |      |      |
| HETATM13211 | H7 | PRP | 932 | 9.891  | 23.199 | 1.989  | 1.00 | 0.00 |
| H           |    |     |     |        |        |        |      |      |
| HETATM13212 | H8 | PRP | 932 | 9.426  | 24.850 | 1.689  | 1.00 | 0.00 |
| H           |    |     |     |        |        |        |      |      |
| HETATM13213 | O1 | PRP | 933 | 18.278 | 42.848 | 0.775  | 1.00 | 0.00 |
| O           |    |     |     |        |        |        |      |      |
| HETATM13214 | H1 | PRP | 933 | 17.533 | 43.450 | 0.707  | 1.00 | 0.00 |
| H           |    |     |     |        |        |        |      |      |
| HETATM13215 | C1 | PRP | 933 | 17.888 | 41.771 | 1.625  | 1.00 | 0.00 |
| C           |    |     |     |        |        |        |      |      |

|             |    |     |     |        |        |        |      |      |
|-------------|----|-----|-----|--------|--------|--------|------|------|
| HETATM13216 | H2 | PRP | 933 | 18.176 | 41.879 | 2.670  | 1.00 | 0.00 |
| H           |    |     |     |        |        |        |      |      |
| HETATM13217 | H3 | PRP | 933 | 16.798 | 41.757 | 1.647  | 1.00 | 0.00 |
| H           |    |     |     |        |        |        |      |      |
| HETATM13218 | C2 | PRP | 933 | 18.451 | 40.372 | 1.147  | 1.00 | 0.00 |
| C           |    |     |     |        |        |        |      |      |
| HETATM13219 | H4 | PRP | 933 | 19.526 | 40.354 | 1.329  | 1.00 | 0.00 |
| H           |    |     |     |        |        |        |      |      |
| HETATM13220 | O2 | PRP | 933 | 18.174 | 40.156 | -0.244 | 1.00 | 0.00 |
| O           |    |     |     |        |        |        |      |      |
| HETATM13221 | H5 | PRP | 933 | 18.817 | 40.663 | -0.744 | 1.00 | 0.00 |
| H           |    |     |     |        |        |        |      |      |
| HETATM13222 | C3 | PRP | 933 | 17.734 | 39.349 | 1.910  | 1.00 | 0.00 |
| C           |    |     |     |        |        |        |      |      |
| HETATM13223 | H6 | PRP | 933 | 18.199 | 38.377 | 1.746  | 1.00 | 0.00 |
| H           |    |     |     |        |        |        |      |      |
| HETATM13224 | H7 | PRP | 933 | 17.926 | 39.535 | 2.967  | 1.00 | 0.00 |
| H           |    |     |     |        |        |        |      |      |
| HETATM13225 | H8 | PRP | 933 | 16.719 | 39.334 | 1.513  | 1.00 | 0.00 |
| H           |    |     |     |        |        |        |      |      |
| HETATM13226 | O1 | PRP | 934 | 15.167 | 33.508 | 9.723  | 1.00 | 0.00 |
| O           |    |     |     |        |        |        |      |      |
| HETATM13227 | H1 | PRP | 934 | 14.876 | 33.789 | 8.852  | 1.00 | 0.00 |
| H           |    |     |     |        |        |        |      |      |
| HETATM13228 | C1 | PRP | 934 | 14.452 | 33.835 | 10.819 | 1.00 | 0.00 |
| C           |    |     |     |        |        |        |      |      |
| HETATM13229 | H2 | PRP | 934 | 14.013 | 34.790 | 10.530 | 1.00 | 0.00 |
| H           |    |     |     |        |        |        |      |      |
| HETATM13230 | H3 | PRP | 934 | 13.761 | 33.006 | 10.972 | 1.00 | 0.00 |
| H           |    |     |     |        |        |        |      |      |
| HETATM13231 | C2 | PRP | 934 | 15.490 | 33.947 | 11.968 | 1.00 | 0.00 |
| C           |    |     |     |        |        |        |      |      |
| HETATM13232 | H4 | PRP | 934 | 16.199 | 34.775 | 11.930 | 1.00 | 0.00 |
| H           |    |     |     |        |        |        |      |      |
| HETATM13233 | O2 | PRP | 934 | 16.342 | 32.839 | 12.074 | 1.00 | 0.00 |
| O           |    |     |     |        |        |        |      |      |
| HETATM13234 | H5 | PRP | 934 | 16.416 | 32.545 | 11.163 | 1.00 | 0.00 |
| H           |    |     |     |        |        |        |      |      |
| HETATM13235 | C3 | PRP | 934 | 14.769 | 34.042 | 13.321 | 1.00 | 0.00 |
| C           |    |     |     |        |        |        |      |      |
| HETATM13236 | H6 | PRP | 934 | 14.344 | 33.079 | 13.603 | 1.00 | 0.00 |
| H           |    |     |     |        |        |        |      |      |
| HETATM13237 | H7 | PRP | 934 | 15.569 | 34.191 | 14.046 | 1.00 | 0.00 |
| H           |    |     |     |        |        |        |      |      |
| HETATM13238 | H8 | PRP | 934 | 13.971 | 34.783 | 13.356 | 1.00 | 0.00 |
| H           |    |     |     |        |        |        |      |      |
| HETATM13239 | O1 | PRP | 935 | 11.487 | 30.552 | -2.108 | 1.00 | 0.00 |
| O           |    |     |     |        |        |        |      |      |
| HETATM13240 | H1 | PRP | 935 | 12.304 | 30.107 | -1.871 | 1.00 | 0.00 |
| H           |    |     |     |        |        |        |      |      |
| HETATM13241 | C1 | PRP | 935 | 10.393 | 29.754 | -1.682 | 1.00 | 0.00 |
| C           |    |     |     |        |        |        |      |      |
| HETATM13242 | H2 | PRP | 935 | 10.099 | 28.994 | -2.406 | 1.00 | 0.00 |
| H           |    |     |     |        |        |        |      |      |
| HETATM13243 | H3 | PRP | 935 | 10.699 | 29.170 | -0.813 | 1.00 | 0.00 |
| H           |    |     |     |        |        |        |      |      |

|             |    |     |     |        |        |        |      |      |
|-------------|----|-----|-----|--------|--------|--------|------|------|
| HETATM13244 | C2 | PRP | 935 | 9.284  | 30.816 | -1.459 | 1.00 | 0.00 |
| C           |    |     |     |        |        |        |      |      |
| HETATM13245 | H4 | PRP | 935 | 8.999  | 31.291 | -2.397 | 1.00 | 0.00 |
| H           |    |     |     |        |        |        |      |      |
| HETATM13246 | O2 | PRP | 935 | 9.605  | 31.708 | -0.412 | 1.00 | 0.00 |
| O           |    |     |     |        |        |        |      |      |
| HETATM13247 | H5 | PRP | 935 | 10.385 | 32.198 | -0.681 | 1.00 | 0.00 |
| H           |    |     |     |        |        |        |      |      |
| HETATM13248 | C3 | PRP | 935 | 8.058  | 29.979 | -1.116 | 1.00 | 0.00 |
| C           |    |     |     |        |        |        |      |      |
| HETATM13249 | H6 | PRP | 935 | 7.167  | 30.493 | -0.757 | 1.00 | 0.00 |
| H           |    |     |     |        |        |        |      |      |
| HETATM13250 | H7 | PRP | 935 | 7.694  | 29.639 | -2.085 | 1.00 | 0.00 |
| H           |    |     |     |        |        |        |      |      |
| HETATM13251 | H8 | PRP | 935 | 8.314  | 29.101 | -0.523 | 1.00 | 0.00 |
| H           |    |     |     |        |        |        |      |      |
| HETATM13252 | O1 | PRP | 936 | 21.026 | 35.703 | 6.002  | 1.00 | 0.00 |
| O           |    |     |     |        |        |        |      |      |
| HETATM13253 | H1 | PRP | 936 | 21.220 | 34.805 | 6.280  | 1.00 | 0.00 |
| H           |    |     |     |        |        |        |      |      |
| HETATM13254 | C1 | PRP | 936 | 21.241 | 35.907 | 4.650  | 1.00 | 0.00 |
| C           |    |     |     |        |        |        |      |      |
| HETATM13255 | H2 | PRP | 936 | 22.284 | 35.650 | 4.468  | 1.00 | 0.00 |
| H           |    |     |     |        |        |        |      |      |
| HETATM13256 | H3 | PRP | 936 | 20.503 | 35.309 | 4.114  | 1.00 | 0.00 |
| H           |    |     |     |        |        |        |      |      |
| HETATM13257 | C2 | PRP | 936 | 21.035 | 37.376 | 4.408  | 1.00 | 0.00 |
| C           |    |     |     |        |        |        |      |      |
| HETATM13258 | H4 | PRP | 936 | 21.676 | 37.979 | 5.052  | 1.00 | 0.00 |
| H           |    |     |     |        |        |        |      |      |
| HETATM13259 | O2 | PRP | 936 | 19.669 | 37.681 | 4.653  | 1.00 | 0.00 |
| O           |    |     |     |        |        |        |      |      |
| HETATM13260 | H5 | PRP | 936 | 19.604 | 37.418 | 5.574  | 1.00 | 0.00 |
| H           |    |     |     |        |        |        |      |      |
| HETATM13261 | C3 | PRP | 936 | 21.551 | 37.724 | 2.996  | 1.00 | 0.00 |
| C           |    |     |     |        |        |        |      |      |
| HETATM13262 | H6 | PRP | 936 | 22.631 | 37.754 | 2.850  | 1.00 | 0.00 |
| H           |    |     |     |        |        |        |      |      |
| HETATM13263 | H7 | PRP | 936 | 21.164 | 36.887 | 2.415  | 1.00 | 0.00 |
| H           |    |     |     |        |        |        |      |      |
| HETATM13264 | H8 | PRP | 936 | 21.232 | 38.747 | 2.796  | 1.00 | 0.00 |
| H           |    |     |     |        |        |        |      |      |
| HETATM13265 | O1 | PRP | 937 | 2.669  | 17.988 | 12.519 | 1.00 | 0.00 |
| O           |    |     |     |        |        |        |      |      |
| HETATM13266 | H1 | PRP | 937 | 1.999  | 17.517 | 13.020 | 1.00 | 0.00 |
| H           |    |     |     |        |        |        |      |      |
| HETATM13267 | C1 | PRP | 937 | 4.039  | 17.581 | 12.902 | 1.00 | 0.00 |
| C           |    |     |     |        |        |        |      |      |
| HETATM13268 | H2 | PRP | 937 | 4.033  | 16.750 | 13.607 | 1.00 | 0.00 |
| H           |    |     |     |        |        |        |      |      |
| HETATM13269 | H3 | PRP | 937 | 4.703  | 17.285 | 12.091 | 1.00 | 0.00 |
| H           |    |     |     |        |        |        |      |      |
| HETATM13270 | C2 | PRP | 937 | 4.607  | 18.863 | 13.590 | 1.00 | 0.00 |
| C           |    |     |     |        |        |        |      |      |
| HETATM13271 | H4 | PRP | 937 | 3.895  | 19.124 | 14.373 | 1.00 | 0.00 |
| H           |    |     |     |        |        |        |      |      |

|             |    |     |     |        |        |        |      |      |
|-------------|----|-----|-----|--------|--------|--------|------|------|
| HETATM13272 | O2 | PRP | 937 | 4.546  | 19.811 | 12.608 | 1.00 | 0.00 |
| O           |    |     |     |        |        |        |      |      |
| HETATM13273 | H5 | PRP | 937 | 3.629  | 19.849 | 12.327 | 1.00 | 0.00 |
| H           |    |     |     |        |        |        |      |      |
| HETATM13274 | C3 | PRP | 937 | 6.060  | 18.622 | 14.135 | 1.00 | 0.00 |
| C           |    |     |     |        |        |        |      |      |
| HETATM13275 | H6 | PRP | 937 | 6.715  | 18.445 | 13.282 | 1.00 | 0.00 |
| H           |    |     |     |        |        |        |      |      |
| HETATM13276 | H7 | PRP | 937 | 6.299  | 19.556 | 14.643 | 1.00 | 0.00 |
| H           |    |     |     |        |        |        |      |      |
| HETATM13277 | H8 | PRP | 937 | 6.064  | 17.825 | 14.878 | 1.00 | 0.00 |
| H           |    |     |     |        |        |        |      |      |
| HETATM13278 | O1 | PRP | 938 | 10.307 | 19.882 | 5.263  | 1.00 | 0.00 |
| O           |    |     |     |        |        |        |      |      |
| HETATM13279 | H1 | PRP | 938 | 10.005 | 20.291 | 4.449  | 1.00 | 0.00 |
| H           |    |     |     |        |        |        |      |      |
| HETATM13280 | C1 | PRP | 938 | 9.946  | 20.719 | 6.306  | 1.00 | 0.00 |
| C           |    |     |     |        |        |        |      |      |
| HETATM13281 | H2 | PRP | 938 | 8.894  | 20.969 | 6.171  | 1.00 | 0.00 |
| H           |    |     |     |        |        |        |      |      |
| HETATM13282 | H3 | PRP | 938 | 10.121 | 20.297 | 7.296  | 1.00 | 0.00 |
| H           |    |     |     |        |        |        |      |      |
| HETATM13283 | C2 | PRP | 938 | 10.750 | 21.997 | 6.344  | 1.00 | 0.00 |
| C           |    |     |     |        |        |        |      |      |
| HETATM13284 | H4 | PRP | 938 | 10.423 | 22.690 | 5.569  | 1.00 | 0.00 |
| H           |    |     |     |        |        |        |      |      |
| HETATM13285 | O2 | PRP | 938 | 12.151 | 21.650 | 6.428  | 1.00 | 0.00 |
| O           |    |     |     |        |        |        |      |      |
| HETATM13286 | H5 | PRP | 938 | 12.378 | 21.271 | 7.280  | 1.00 | 0.00 |
| H           |    |     |     |        |        |        |      |      |
| HETATM13287 | C3 | PRP | 938 | 10.402 | 22.716 | 7.632  | 1.00 | 0.00 |
| C           |    |     |     |        |        |        |      |      |
| HETATM13288 | H6 | PRP | 938 | 10.680 | 22.157 | 8.526  | 1.00 | 0.00 |
| H           |    |     |     |        |        |        |      |      |
| HETATM13289 | H7 | PRP | 938 | 11.020 | 23.613 | 7.598  | 1.00 | 0.00 |
| H           |    |     |     |        |        |        |      |      |
| HETATM13290 | H8 | PRP | 938 | 9.353  | 23.003 | 7.558  | 1.00 | 0.00 |
| H           |    |     |     |        |        |        |      |      |
| HETATM13291 | O1 | PRP | 939 | 15.038 | 19.220 | -1.231 | 1.00 | 0.00 |
| O           |    |     |     |        |        |        |      |      |
| HETATM13292 | H1 | PRP | 939 | 15.119 | 19.213 | -2.188 | 1.00 | 0.00 |
| H           |    |     |     |        |        |        |      |      |
| HETATM13293 | C1 | PRP | 939 | 15.045 | 20.580 | -0.923 | 1.00 | 0.00 |
| C           |    |     |     |        |        |        |      |      |
| HETATM13294 | H2 | PRP | 939 | 14.838 | 20.671 | 0.144  | 1.00 | 0.00 |
| H           |    |     |     |        |        |        |      |      |
| HETATM13295 | H3 | PRP | 939 | 16.004 | 21.055 | -1.129 | 1.00 | 0.00 |
| H           |    |     |     |        |        |        |      |      |
| HETATM13296 | C2 | PRP | 939 | 13.956 | 21.324 | -1.752 | 1.00 | 0.00 |
| C           |    |     |     |        |        |        |      |      |
| HETATM13297 | H4 | PRP | 939 | 13.045 | 20.758 | -1.562 | 1.00 | 0.00 |
| H           |    |     |     |        |        |        |      |      |
| HETATM13298 | O2 | PRP | 939 | 14.132 | 21.313 | -3.151 | 1.00 | 0.00 |
| O           |    |     |     |        |        |        |      |      |
| HETATM13299 | H5 | PRP | 939 | 13.829 | 22.147 | -3.516 | 1.00 | 0.00 |
| H           |    |     |     |        |        |        |      |      |

|             |    |     |     |        |        |        |      |      |
|-------------|----|-----|-----|--------|--------|--------|------|------|
| HETATM13300 | C3 | PRP | 939 | 13.758 | 22.813 | -1.374 | 1.00 | 0.00 |
| C           |    |     |     |        |        |        |      |      |
| HETATM13301 | H6 | PRP | 939 | 13.483 | 22.876 | -0.321 | 1.00 | 0.00 |
| H           |    |     |     |        |        |        |      |      |
| HETATM13302 | H7 | PRP | 939 | 14.739 | 23.280 | -1.464 | 1.00 | 0.00 |
| H           |    |     |     |        |        |        |      |      |
| HETATM13303 | H8 | PRP | 939 | 13.140 | 23.268 | -2.147 | 1.00 | 0.00 |
| H           |    |     |     |        |        |        |      |      |
| HETATM13304 | O1 | PRP | 940 | 25.376 | 35.924 | 3.993  | 1.00 | 0.00 |
| O           |    |     |     |        |        |        |      |      |
| HETATM13305 | H1 | PRP | 940 | 25.208 | 36.021 | 3.053  | 1.00 | 0.00 |
| H           |    |     |     |        |        |        |      |      |
| HETATM13306 | C1 | PRP | 940 | 25.978 | 34.709 | 4.300  | 1.00 | 0.00 |
| C           |    |     |     |        |        |        |      |      |
| HETATM13307 | H2 | PRP | 940 | 26.325 | 34.761 | 5.331  | 1.00 | 0.00 |
| H           |    |     |     |        |        |        |      |      |
| HETATM13308 | H3 | PRP | 940 | 25.258 | 33.932 | 4.041  | 1.00 | 0.00 |
| H           |    |     |     |        |        |        |      |      |
| HETATM13309 | C2 | PRP | 940 | 27.055 | 34.340 | 3.398  | 1.00 | 0.00 |
| C           |    |     |     |        |        |        |      |      |
| HETATM13310 | H4 | PRP | 940 | 27.692 | 35.219 | 3.497  | 1.00 | 0.00 |
| H           |    |     |     |        |        |        |      |      |
| HETATM13311 | O2 | PRP | 940 | 26.668 | 34.040 | 2.032  | 1.00 | 0.00 |
| O           |    |     |     |        |        |        |      |      |
| HETATM13312 | H5 | PRP | 940 | 26.267 | 34.796 | 1.597  | 1.00 | 0.00 |
| H           |    |     |     |        |        |        |      |      |
| HETATM13313 | C3 | PRP | 940 | 27.920 | 33.225 | 4.025  | 1.00 | 0.00 |
| C           |    |     |     |        |        |        |      |      |
| HETATM13314 | H6 | PRP | 940 | 28.781 | 33.016 | 3.390  | 1.00 | 0.00 |
| H           |    |     |     |        |        |        |      |      |
| HETATM13315 | H7 | PRP | 940 | 28.359 | 33.563 | 4.964  | 1.00 | 0.00 |
| H           |    |     |     |        |        |        |      |      |
| HETATM13316 | H8 | PRP | 940 | 27.303 | 32.354 | 4.243  | 1.00 | 0.00 |
| H           |    |     |     |        |        |        |      |      |
| HETATM13317 | O1 | PRP | 941 | 27.087 | 23.059 | -5.755 | 1.00 | 0.00 |
| O           |    |     |     |        |        |        |      |      |
| HETATM13318 | H1 | PRP | 941 | 26.401 | 23.217 | -5.103 | 1.00 | 0.00 |
| H           |    |     |     |        |        |        |      |      |
| HETATM13319 | C1 | PRP | 941 | 26.998 | 23.985 | -6.856 | 1.00 | 0.00 |
| C           |    |     |     |        |        |        |      |      |
| HETATM13320 | H2 | PRP | 941 | 27.656 | 23.569 | -7.619 | 1.00 | 0.00 |
| H           |    |     |     |        |        |        |      |      |
| HETATM13321 | H3 | PRP | 941 | 26.025 | 24.284 | -7.246 | 1.00 | 0.00 |
| H           |    |     |     |        |        |        |      |      |
| HETATM13322 | C2 | PRP | 941 | 27.645 | 25.338 | -6.421 | 1.00 | 0.00 |
| C           |    |     |     |        |        |        |      |      |
| HETATM13323 | H4 | PRP | 941 | 28.487 | 25.084 | -5.777 | 1.00 | 0.00 |
| H           |    |     |     |        |        |        |      |      |
| HETATM13324 | O2 | PRP | 941 | 26.767 | 26.152 | -5.740 | 1.00 | 0.00 |
| O           |    |     |     |        |        |        |      |      |
| HETATM13325 | H5 | PRP | 941 | 26.295 | 26.578 | -6.459 | 1.00 | 0.00 |
| H           |    |     |     |        |        |        |      |      |
| HETATM13326 | C3 | PRP | 941 | 28.342 | 26.016 | -7.545 | 1.00 | 0.00 |
| C           |    |     |     |        |        |        |      |      |
| HETATM13327 | H6 | PRP | 941 | 29.038 | 26.768 | -7.174 | 1.00 | 0.00 |
| H           |    |     |     |        |        |        |      |      |

|             |    |     |     |        |        |        |      |      |
|-------------|----|-----|-----|--------|--------|--------|------|------|
| HETATM13328 | H7 | PRP | 941 | 28.919 | 25.302 | -8.133 | 1.00 | 0.00 |
| H           |    |     |     |        |        |        |      |      |
| HETATM13329 | H8 | PRP | 941 | 27.651 | 26.516 | -8.224 | 1.00 | 0.00 |
| H           |    |     |     |        |        |        |      |      |
| HETATM13330 | O1 | PRP | 942 | -5.311 | 37.191 | 7.595  | 1.00 | 0.00 |
| O           |    |     |     |        |        |        |      |      |
| HETATM13331 | H1 | PRP | 942 | -4.884 | 36.721 | 6.874  | 1.00 | 0.00 |
| H           |    |     |     |        |        |        |      |      |
| HETATM13332 | C1 | PRP | 942 | -4.389 | 38.064 | 8.184  | 1.00 | 0.00 |
| C           |    |     |     |        |        |        |      |      |
| HETATM13333 | H2 | PRP | 942 | -3.627 | 37.558 | 8.776  | 1.00 | 0.00 |
| H           |    |     |     |        |        |        |      |      |
| HETATM13334 | H3 | PRP | 942 | -3.947 | 38.620 | 7.357  | 1.00 | 0.00 |
| H           |    |     |     |        |        |        |      |      |
| HETATM13335 | C2 | PRP | 942 | -5.306 | 39.047 | 8.923  | 1.00 | 0.00 |
| C           |    |     |     |        |        |        |      |      |
| HETATM13336 | H4 | PRP | 942 | -5.694 | 38.509 | 9.787  | 1.00 | 0.00 |
| H           |    |     |     |        |        |        |      |      |
| HETATM13337 | O2 | PRP | 942 | -6.317 | 39.541 | 8.073  | 1.00 | 0.00 |
| O           |    |     |     |        |        |        |      |      |
| HETATM13338 | H5 | PRP | 942 | -6.335 | 38.923 | 7.339  | 1.00 | 0.00 |
| H           |    |     |     |        |        |        |      |      |
| HETATM13339 | C3 | PRP | 942 | -4.440 | 40.247 | 9.413  | 1.00 | 0.00 |
| C           |    |     |     |        |        |        |      |      |
| HETATM13340 | H6 | PRP | 942 | -4.946 | 41.099 | 9.869  | 1.00 | 0.00 |
| H           |    |     |     |        |        |        |      |      |
| HETATM13341 | H7 | PRP | 942 | -3.836 | 39.954 | 10.272 | 1.00 | 0.00 |
| H           |    |     |     |        |        |        |      |      |
| HETATM13342 | H8 | PRP | 942 | -3.923 | 40.737 | 8.589  | 1.00 | 0.00 |
| H           |    |     |     |        |        |        |      |      |
| HETATM13343 | O1 | PRP | 943 | -3.170 | 33.819 | 17.552 | 1.00 | 0.00 |
| O           |    |     |     |        |        |        |      |      |
| HETATM13344 | H1 | PRP | 943 | -2.502 | 33.264 | 17.142 | 1.00 | 0.00 |
| H           |    |     |     |        |        |        |      |      |
| HETATM13345 | C1 | PRP | 943 | -2.386 | 34.866 | 18.200 | 1.00 | 0.00 |
| C           |    |     |     |        |        |        |      |      |
| HETATM13346 | H2 | PRP | 943 | -1.399 | 34.898 | 17.738 | 1.00 | 0.00 |
| H           |    |     |     |        |        |        |      |      |
| HETATM13347 | H3 | PRP | 943 | -2.948 | 35.795 | 18.102 | 1.00 | 0.00 |
| H           |    |     |     |        |        |        |      |      |
| HETATM13348 | C2 | PRP | 943 | -2.298 | 34.510 | 19.684 | 1.00 | 0.00 |
| C           |    |     |     |        |        |        |      |      |
| HETATM13349 | H4 | PRP | 943 | -1.762 | 33.561 | 19.673 | 1.00 | 0.00 |
| H           |    |     |     |        |        |        |      |      |
| HETATM13350 | O2 | PRP | 943 | -3.626 | 34.349 | 20.231 | 1.00 | 0.00 |
| O           |    |     |     |        |        |        |      |      |
| HETATM13351 | H5 | PRP | 943 | -3.919 | 33.572 | 19.748 | 1.00 | 0.00 |
| H           |    |     |     |        |        |        |      |      |
| HETATM13352 | C3 | PRP | 943 | -1.650 | 35.615 | 20.530 | 1.00 | 0.00 |
| C           |    |     |     |        |        |        |      |      |
| HETATM13353 | H6 | PRP | 943 | -2.173 | 36.571 | 20.491 | 1.00 | 0.00 |
| H           |    |     |     |        |        |        |      |      |
| HETATM13354 | H7 | PRP | 943 | -1.550 | 35.307 | 21.570 | 1.00 | 0.00 |
| H           |    |     |     |        |        |        |      |      |
| HETATM13355 | H8 | PRP | 943 | -0.614 | 35.735 | 20.214 | 1.00 | 0.00 |
| H           |    |     |     |        |        |        |      |      |



|             |    |     |     |        |        |        |      |      |
|-------------|----|-----|-----|--------|--------|--------|------|------|
| HETATM13356 | O1 | PRP | 944 | -4.481 | 37.684 | 12.214 | 1.00 | 0.00 |
| O           |    |     |     |        |        |        |      |      |
| HETATM13357 | H1 | PRP | 944 | -4.177 | 38.421 | 12.748 | 1.00 | 0.00 |
| H           |    |     |     |        |        |        |      |      |
| HETATM13358 | C1 | PRP | 944 | -5.138 | 37.012 | 13.216 | 1.00 | 0.00 |
| C           |    |     |     |        |        |        |      |      |
| HETATM13359 | H2 | PRP | 944 | -6.086 | 37.534 | 13.347 | 1.00 | 0.00 |
| H           |    |     |     |        |        |        |      |      |
| HETATM13360 | H3 | PRP | 944 | -5.264 | 35.964 | 12.946 | 1.00 | 0.00 |
| H           |    |     |     |        |        |        |      |      |
| HETATM13361 | C2 | PRP | 944 | -4.406 | 37.153 | 14.582 | 1.00 | 0.00 |
| C           |    |     |     |        |        |        |      |      |
| HETATM13362 | H4 | PRP | 944 | -5.072 | 36.915 | 15.412 | 1.00 | 0.00 |
| H           |    |     |     |        |        |        |      |      |
| HETATM13363 | O2 | PRP | 944 | -3.812 | 38.436 | 14.704 | 1.00 | 0.00 |
| O           |    |     |     |        |        |        |      |      |
| HETATM13364 | H5 | PRP | 944 | -4.166 | 38.873 | 15.483 | 1.00 | 0.00 |
| H           |    |     |     |        |        |        |      |      |
| HETATM13365 | C3 | PRP | 944 | -3.183 | 36.165 | 14.511 | 1.00 | 0.00 |
| C           |    |     |     |        |        |        |      |      |
| HETATM13366 | H6 | PRP | 944 | -2.322 | 36.594 | 13.998 | 1.00 | 0.00 |
| H           |    |     |     |        |        |        |      |      |
| HETATM13367 | H7 | PRP | 944 | -2.882 | 36.077 | 15.554 | 1.00 | 0.00 |
| H           |    |     |     |        |        |        |      |      |
| HETATM13368 | H8 | PRP | 944 | -3.432 | 35.163 | 14.161 | 1.00 | 0.00 |
| H           |    |     |     |        |        |        |      |      |
| HETATM13369 | O1 | PRP | 945 | -6.330 | 33.123 | 22.878 | 1.00 | 0.00 |
| O           |    |     |     |        |        |        |      |      |
| HETATM13370 | H1 | PRP | 945 | -5.470 | 32.714 | 22.995 | 1.00 | 0.00 |
| H           |    |     |     |        |        |        |      |      |
| HETATM13371 | C1 | PRP | 945 | -7.139 | 32.429 | 23.783 | 1.00 | 0.00 |
| C           |    |     |     |        |        |        |      |      |
| HETATM13372 | H2 | PRP | 945 | -6.974 | 32.762 | 24.807 | 1.00 | 0.00 |
| H           |    |     |     |        |        |        |      |      |
| HETATM13373 | H3 | PRP | 945 | -8.200 | 32.643 | 23.652 | 1.00 | 0.00 |
| H           |    |     |     |        |        |        |      |      |
| HETATM13374 | C2 | PRP | 945 | -6.943 | 30.868 | 23.691 | 1.00 | 0.00 |
| C           |    |     |     |        |        |        |      |      |
| HETATM13375 | H4 | PRP | 945 | -7.612 | 30.493 | 24.465 | 1.00 | 0.00 |
| H           |    |     |     |        |        |        |      |      |
| HETATM13376 | O2 | PRP | 945 | -5.619 | 30.512 | 24.076 | 1.00 | 0.00 |
| O           |    |     |     |        |        |        |      |      |
| HETATM13377 | H5 | PRP | 945 | -5.515 | 29.822 | 24.736 | 1.00 | 0.00 |
| H           |    |     |     |        |        |        |      |      |
| HETATM13378 | C3 | PRP | 945 | -7.366 | 30.157 | 22.419 | 1.00 | 0.00 |
| C           |    |     |     |        |        |        |      |      |
| HETATM13379 | H6 | PRP | 945 | -6.931 | 29.160 | 22.352 | 1.00 | 0.00 |
| H           |    |     |     |        |        |        |      |      |
| HETATM13380 | H7 | PRP | 945 | -8.455 | 30.176 | 22.443 | 1.00 | 0.00 |
| H           |    |     |     |        |        |        |      |      |
| HETATM13381 | H8 | PRP | 945 | -7.128 | 30.810 | 21.580 | 1.00 | 0.00 |
| H           |    |     |     |        |        |        |      |      |
| HETATM13382 | O1 | PRP | 946 | -1.522 | 18.905 | 22.530 | 1.00 | 0.00 |
| O           |    |     |     |        |        |        |      |      |
| HETATM13383 | H1 | PRP | 946 | -0.830 | 19.147 | 21.910 | 1.00 | 0.00 |
| H           |    |     |     |        |        |        |      |      |

|             |    |     |     |        |        |        |      |      |
|-------------|----|-----|-----|--------|--------|--------|------|------|
| HETATM13384 | C1 | PRP | 946 | -2.171 | 20.132 | 22.816 | 1.00 | 0.00 |
| C           |    |     |     |        |        |        |      |      |
| HETATM13385 | H2 | PRP | 946 | -3.004 | 19.937 | 23.492 | 1.00 | 0.00 |
| H           |    |     |     |        |        |        |      |      |
| HETATM13386 | H3 | PRP | 946 | -1.460 | 20.715 | 23.400 | 1.00 | 0.00 |
| H           |    |     |     |        |        |        |      |      |
| HETATM13387 | C2 | PRP | 946 | -2.625 | 20.875 | 21.524 | 1.00 | 0.00 |
| C           |    |     |     |        |        |        |      |      |
| HETATM13388 | H4 | PRP | 946 | -3.144 | 20.062 | 21.016 | 1.00 | 0.00 |
| H           |    |     |     |        |        |        |      |      |
| HETATM13389 | O2 | PRP | 946 | -1.575 | 21.239 | 20.652 | 1.00 | 0.00 |
| O           |    |     |     |        |        |        |      |      |
| HETATM13390 | H5 | PRP | 946 | -1.950 | 21.445 | 19.792 | 1.00 | 0.00 |
| H           |    |     |     |        |        |        |      |      |
| HETATM13391 | C3 | PRP | 946 | -3.612 | 21.942 | 21.903 | 1.00 | 0.00 |
| C           |    |     |     |        |        |        |      |      |
| HETATM13392 | H6 | PRP | 946 | -3.219 | 22.672 | 22.610 | 1.00 | 0.00 |
| H           |    |     |     |        |        |        |      |      |
| HETATM13393 | H7 | PRP | 946 | -4.003 | 22.359 | 20.975 | 1.00 | 0.00 |
| H           |    |     |     |        |        |        |      |      |
| HETATM13394 | H8 | PRP | 946 | -4.479 | 21.544 | 22.431 | 1.00 | 0.00 |
| H           |    |     |     |        |        |        |      |      |
| HETATM13395 | O1 | PRP | 947 | -0.102 | 30.354 | 25.235 | 1.00 | 0.00 |
| O           |    |     |     |        |        |        |      |      |
| HETATM13396 | H1 | PRP | 947 | 0.555  | 31.042 | 25.361 | 1.00 | 0.00 |
| H           |    |     |     |        |        |        |      |      |
| HETATM13397 | C1 | PRP | 947 | 0.496  | 29.198 | 24.659 | 1.00 | 0.00 |
| C           |    |     |     |        |        |        |      |      |
| HETATM13398 | H2 | PRP | 947 | -0.273 | 28.502 | 24.324 | 1.00 | 0.00 |
| H           |    |     |     |        |        |        |      |      |
| HETATM13399 | H3 | PRP | 947 | 1.099  | 29.469 | 23.793 | 1.00 | 0.00 |
| H           |    |     |     |        |        |        |      |      |
| HETATM13400 | C2 | PRP | 947 | 1.323  | 28.408 | 25.663 | 1.00 | 0.00 |
| C           |    |     |     |        |        |        |      |      |
| HETATM13401 | H4 | PRP | 947 | 1.687  | 27.487 | 25.206 | 1.00 | 0.00 |
| H           |    |     |     |        |        |        |      |      |
| HETATM13402 | O2 | PRP | 947 | 0.531  | 27.982 | 26.777 | 1.00 | 0.00 |
| O           |    |     |     |        |        |        |      |      |
| HETATM13403 | H5 | PRP | 947 | 0.234  | 28.799 | 27.183 | 1.00 | 0.00 |
| H           |    |     |     |        |        |        |      |      |
| HETATM13404 | C3 | PRP | 947 | 2.553  | 29.089 | 26.151 | 1.00 | 0.00 |
| C           |    |     |     |        |        |        |      |      |
| HETATM13405 | H6 | PRP | 947 | 3.016  | 28.498 | 26.940 | 1.00 | 0.00 |
| H           |    |     |     |        |        |        |      |      |
| HETATM13406 | H7 | PRP | 947 | 3.246  | 29.377 | 25.360 | 1.00 | 0.00 |
| H           |    |     |     |        |        |        |      |      |
| HETATM13407 | H8 | PRP | 947 | 2.304  | 30.069 | 26.558 | 1.00 | 0.00 |
| H           |    |     |     |        |        |        |      |      |
| HETATM13408 | O1 | PRP | 948 | 11.526 | 33.357 | -3.160 | 1.00 | 0.00 |
| O           |    |     |     |        |        |        |      |      |
| HETATM13409 | H1 | PRP | 948 | 11.315 | 32.587 | -2.626 | 1.00 | 0.00 |
| H           |    |     |     |        |        |        |      |      |
| HETATM13410 | C1 | PRP | 948 | 12.445 | 34.141 | -2.350 | 1.00 | 0.00 |
| C           |    |     |     |        |        |        |      |      |
| HETATM13411 | H2 | PRP | 948 | 13.339 | 33.546 | -2.166 | 1.00 | 0.00 |
| H           |    |     |     |        |        |        |      |      |

|             |    |     |     |        |        |        |      |      |
|-------------|----|-----|-----|--------|--------|--------|------|------|
| HETATM13412 | H3 | PRP | 948 | 12.891 | 35.027 | -2.801 | 1.00 | 0.00 |
| H           |    |     |     |        |        |        |      |      |
| HETATM13413 | C2 | PRP | 948 | 11.926 | 34.544 | -0.949 | 1.00 | 0.00 |
| C           |    |     |     |        |        |        |      |      |
| HETATM13414 | H4 | PRP | 948 | 12.658 | 35.187 | -0.461 | 1.00 | 0.00 |
| H           |    |     |     |        |        |        |      |      |
| HETATM13415 | O2 | PRP | 948 | 11.873 | 33.363 | -0.153 | 1.00 | 0.00 |
| O           |    |     |     |        |        |        |      |      |
| HETATM13416 | H5 | PRP | 948 | 11.721 | 33.522 | 0.781  | 1.00 | 0.00 |
| H           |    |     |     |        |        |        |      |      |
| HETATM13417 | C3 | PRP | 948 | 10.601 | 35.305 | -1.071 | 1.00 | 0.00 |
| C           |    |     |     |        |        |        |      |      |
| HETATM13418 | H6 | PRP | 948 | 10.120 | 35.062 | -0.123 | 1.00 | 0.00 |
| H           |    |     |     |        |        |        |      |      |
| HETATM13419 | H7 | PRP | 948 | 10.755 | 36.384 | -1.055 | 1.00 | 0.00 |
| H           |    |     |     |        |        |        |      |      |
| HETATM13420 | H8 | PRP | 948 | 10.023 | 34.936 | -1.918 | 1.00 | 0.00 |
| H           |    |     |     |        |        |        |      |      |
| HETATM13421 | O1 | PRP | 949 | 13.724 | 43.614 | 9.685  | 1.00 | 0.00 |
| O           |    |     |     |        |        |        |      |      |
| HETATM13422 | H1 | PRP | 949 | 13.370 | 44.349 | 10.191 | 1.00 | 0.00 |
| H           |    |     |     |        |        |        |      |      |
| HETATM13423 | C1 | PRP | 949 | 14.910 | 44.041 | 8.933  | 1.00 | 0.00 |
| C           |    |     |     |        |        |        |      |      |
| HETATM13424 | H2 | PRP | 949 | 15.824 | 43.896 | 9.509  | 1.00 | 0.00 |
| H           |    |     |     |        |        |        |      |      |
| HETATM13425 | H3 | PRP | 949 | 14.925 | 43.374 | 8.071  | 1.00 | 0.00 |
| H           |    |     |     |        |        |        |      |      |
| HETATM13426 | C2 | PRP | 949 | 14.795 | 45.413 | 8.354  | 1.00 | 0.00 |
| C           |    |     |     |        |        |        |      |      |
| HETATM13427 | H4 | PRP | 949 | 15.696 | 45.654 | 7.789  | 1.00 | 0.00 |
| H           |    |     |     |        |        |        |      |      |
| HETATM13428 | O2 | PRP | 949 | 14.817 | 46.361 | 9.386  | 1.00 | 0.00 |
| O           |    |     |     |        |        |        |      |      |
| HETATM13429 | H5 | PRP | 949 | 15.501 | 46.016 | 9.965  | 1.00 | 0.00 |
| H           |    |     |     |        |        |        |      |      |
| HETATM13430 | C3 | PRP | 949 | 13.468 | 45.535 | 7.627  | 1.00 | 0.00 |
| C           |    |     |     |        |        |        |      |      |
| HETATM13431 | H6 | PRP | 949 | 13.357 | 44.680 | 6.960  | 1.00 | 0.00 |
| H           |    |     |     |        |        |        |      |      |
| HETATM13432 | H7 | PRP | 949 | 12.613 | 45.580 | 8.302  | 1.00 | 0.00 |
| H           |    |     |     |        |        |        |      |      |
| HETATM13433 | H8 | PRP | 949 | 13.399 | 46.450 | 7.039  | 1.00 | 0.00 |
| H           |    |     |     |        |        |        |      |      |
| HETATM13434 | O1 | PRP | 950 | -1.067 | 16.277 | 9.563  | 1.00 | 0.00 |
| O           |    |     |     |        |        |        |      |      |
| HETATM13435 | H1 | PRP | 950 | -1.792 | 16.337 | 10.190 | 1.00 | 0.00 |
| H           |    |     |     |        |        |        |      |      |
| HETATM13436 | C1 | PRP | 950 | -1.698 | 16.217 | 8.245  | 1.00 | 0.00 |
| C           |    |     |     |        |        |        |      |      |
| HETATM13437 | H2 | PRP | 950 | -0.785 | 16.478 | 7.709  | 1.00 | 0.00 |
| H           |    |     |     |        |        |        |      |      |
| HETATM13438 | H3 | PRP | 950 | -2.116 | 15.223 | 8.087  | 1.00 | 0.00 |
| H           |    |     |     |        |        |        |      |      |
| HETATM13439 | C2 | PRP | 950 | -2.801 | 17.225 | 8.001  | 1.00 | 0.00 |
| C           |    |     |     |        |        |        |      |      |

|             |    |     |     |        |        |       |      |      |
|-------------|----|-----|-----|--------|--------|-------|------|------|
| HETATM13440 | H4 | PRP | 950 | -2.510 | 18.187 | 8.423 | 1.00 | 0.00 |
| H           |    |     |     |        |        |       |      |      |
| HETATM13441 | O2 | PRP | 950 | -4.041 | 16.818 | 8.371 | 1.00 | 0.00 |
| O           |    |     |     |        |        |       |      |      |
| HETATM13442 | H5 | PRP | 950 | -4.617 | 17.263 | 7.745 | 1.00 | 0.00 |
| H           |    |     |     |        |        |       |      |      |
| HETATM13443 | C3 | PRP | 950 | -2.784 | 17.361 | 6.469 | 1.00 | 0.00 |
| C           |    |     |     |        |        |       |      |      |
| HETATM13444 | H6 | PRP | 950 | -1.742 | 17.575 | 6.233 | 1.00 | 0.00 |
| H           |    |     |     |        |        |       |      |      |
| HETATM13445 | H7 | PRP | 950 | -3.158 | 16.462 | 5.979 | 1.00 | 0.00 |
| H           |    |     |     |        |        |       |      |      |
| HETATM13446 | H8 | PRP | 950 | -3.392 | 18.236 | 6.241 | 1.00 | 0.00 |
| H           |    |     |     |        |        |       |      |      |
| HETATM13447 | O1 | PRP | 951 | 1.608  | 25.108 | 2.208 | 1.00 | 0.00 |
| O           |    |     |     |        |        |       |      |      |
| HETATM13448 | H1 | PRP | 951 | 1.870  | 25.813 | 2.805 | 1.00 | 0.00 |
| H           |    |     |     |        |        |       |      |      |
| HETATM13449 | C1 | PRP | 951 | 0.730  | 24.321 | 3.011 | 1.00 | 0.00 |
| C           |    |     |     |        |        |       |      |      |
| HETATM13450 | H2 | PRP | 951 | 0.571  | 23.345 | 2.553 | 1.00 | 0.00 |
| H           |    |     |     |        |        |       |      |      |
| HETATM13451 | H3 | PRP | 951 | 1.173  | 24.300 | 4.006 | 1.00 | 0.00 |
| H           |    |     |     |        |        |       |      |      |
| HETATM13452 | C2 | PRP | 951 | -0.625 | 25.112 | 3.069 | 1.00 | 0.00 |
| C           |    |     |     |        |        |       |      |      |
| HETATM13453 | H4 | PRP | 951 | -0.911 | 25.306 | 2.035 | 1.00 | 0.00 |
| H           |    |     |     |        |        |       |      |      |
| HETATM13454 | O2 | PRP | 951 | -0.497 | 26.355 | 3.823 | 1.00 | 0.00 |
| O           |    |     |     |        |        |       |      |      |
| HETATM13455 | H5 | PRP | 951 | 0.341  | 26.789 | 3.645 | 1.00 | 0.00 |
| H           |    |     |     |        |        |       |      |      |
| HETATM13456 | C3 | PRP | 951 | -1.790 | 24.411 | 3.765 | 1.00 | 0.00 |
| C           |    |     |     |        |        |       |      |      |
| HETATM13457 | H6 | PRP | 951 | -1.472 | 24.024 | 4.733 | 1.00 | 0.00 |
| H           |    |     |     |        |        |       |      |      |
| HETATM13458 | H7 | PRP | 951 | -2.683 | 25.027 | 3.876 | 1.00 | 0.00 |
| H           |    |     |     |        |        |       |      |      |
| HETATM13459 | H8 | PRP | 951 | -2.094 | 23.524 | 3.209 | 1.00 | 0.00 |
| H           |    |     |     |        |        |       |      |      |
| HETATM13460 | O1 | PRP | 952 | 2.769  | 27.236 | 3.824 | 1.00 | 0.00 |
| O           |    |     |     |        |        |       |      |      |
| HETATM13461 | H1 | PRP | 952 | 3.664  | 27.441 | 3.545 | 1.00 | 0.00 |
| H           |    |     |     |        |        |       |      |      |
| HETATM13462 | C1 | PRP | 952 | 2.456  | 28.446 | 4.500 | 1.00 | 0.00 |
| C           |    |     |     |        |        |       |      |      |
| HETATM13463 | H2 | PRP | 952 | 2.195  | 29.234 | 3.794 | 1.00 | 0.00 |
| H           |    |     |     |        |        |       |      |      |
| HETATM13464 | H3 | PRP | 952 | 1.720  | 28.370 | 5.300 | 1.00 | 0.00 |
| H           |    |     |     |        |        |       |      |      |
| HETATM13465 | C2 | PRP | 952 | 3.740  | 29.010 | 5.199 | 1.00 | 0.00 |
| C           |    |     |     |        |        |       |      |      |
| HETATM13466 | H4 | PRP | 952 | 3.741  | 30.100 | 5.210 | 1.00 | 0.00 |
| H           |    |     |     |        |        |       |      |      |
| HETATM13467 | O2 | PRP | 952 | 4.967  | 28.713 | 4.502 | 1.00 | 0.00 |
| O           |    |     |     |        |        |       |      |      |

|             |    |     |     |        |        |        |      |      |
|-------------|----|-----|-----|--------|--------|--------|------|------|
| HETATM13468 | H5 | PRP | 952 | 5.613  | 29.193 | 5.026  | 1.00 | 0.00 |
| H           |    |     |     |        |        |        |      |      |
| HETATM13469 | C3 | PRP | 952 | 3.902  | 28.416 | 6.632  | 1.00 | 0.00 |
| C           |    |     |     |        |        |        |      |      |
| HETATM13470 | H6 | PRP | 952 | 4.862  | 28.651 | 7.091  | 1.00 | 0.00 |
| H           |    |     |     |        |        |        |      |      |
| HETATM13471 | H7 | PRP | 952 | 3.033  | 28.808 | 7.160  | 1.00 | 0.00 |
| H           |    |     |     |        |        |        |      |      |
| HETATM13472 | H8 | PRP | 952 | 3.808  | 27.331 | 6.690  | 1.00 | 0.00 |
| H           |    |     |     |        |        |        |      |      |
| HETATM13473 | O1 | PRP | 953 | 15.669 | 44.985 | 1.088  | 1.00 | 0.00 |
| O           |    |     |     |        |        |        |      |      |
| HETATM13474 | H1 | PRP | 953 | 15.694 | 45.820 | 0.615  | 1.00 | 0.00 |
| H           |    |     |     |        |        |        |      |      |
| HETATM13475 | C1 | PRP | 953 | 15.149 | 45.285 | 2.356  | 1.00 | 0.00 |
| C           |    |     |     |        |        |        |      |      |
| HETATM13476 | H2 | PRP | 953 | 15.993 | 45.540 | 2.996  | 1.00 | 0.00 |
| H           |    |     |     |        |        |        |      |      |
| HETATM13477 | H3 | PRP | 953 | 14.321 | 45.994 | 2.365  | 1.00 | 0.00 |
| H           |    |     |     |        |        |        |      |      |
| HETATM13478 | C2 | PRP | 953 | 14.758 | 43.878 | 2.951  | 1.00 | 0.00 |
| C           |    |     |     |        |        |        |      |      |
| HETATM13479 | H4 | PRP | 953 | 15.620 | 43.212 | 2.990  | 1.00 | 0.00 |
| H           |    |     |     |        |        |        |      |      |
| HETATM13480 | O2 | PRP | 953 | 13.665 | 43.497 | 2.253  | 1.00 | 0.00 |
| O           |    |     |     |        |        |        |      |      |
| HETATM13481 | H5 | PRP | 953 | 13.812 | 43.594 | 1.310  | 1.00 | 0.00 |
| H           |    |     |     |        |        |        |      |      |
| HETATM13482 | C3 | PRP | 953 | 14.398 | 44.076 | 4.509  | 1.00 | 0.00 |
| C           |    |     |     |        |        |        |      |      |
| HETATM13483 | H6 | PRP | 953 | 15.217 | 44.488 | 5.098  | 1.00 | 0.00 |
| H           |    |     |     |        |        |        |      |      |
| HETATM13484 | H7 | PRP | 953 | 13.550 | 44.749 | 4.632  | 1.00 | 0.00 |
| H           |    |     |     |        |        |        |      |      |
| HETATM13485 | H8 | PRP | 953 | 14.156 | 43.077 | 4.871  | 1.00 | 0.00 |
| H           |    |     |     |        |        |        |      |      |
| HETATM13486 | O1 | PRP | 954 | -0.039 | 30.103 | 14.865 | 1.00 | 0.00 |
| O           |    |     |     |        |        |        |      |      |
| HETATM13487 | H1 | PRP | 954 | 0.090  | 30.025 | 13.917 | 1.00 | 0.00 |
| H           |    |     |     |        |        |        |      |      |
| HETATM13488 | C1 | PRP | 954 | 0.645  | 31.228 | 15.425 | 1.00 | 0.00 |
| C           |    |     |     |        |        |        |      |      |
| HETATM13489 | H2 | PRP | 954 | 0.886  | 31.007 | 16.465 | 1.00 | 0.00 |
| H           |    |     |     |        |        |        |      |      |
| HETATM13490 | H3 | PRP | 954 | 1.605  | 31.259 | 14.910 | 1.00 | 0.00 |
| H           |    |     |     |        |        |        |      |      |
| HETATM13491 | C2 | PRP | 954 | -0.104 | 32.646 | 15.281 | 1.00 | 0.00 |
| C           |    |     |     |        |        |        |      |      |
| HETATM13492 | H4 | PRP | 954 | 0.386  | 33.508 | 15.734 | 1.00 | 0.00 |
| H           |    |     |     |        |        |        |      |      |
| HETATM13493 | O2 | PRP | 954 | -1.349 | 32.472 | 15.993 | 1.00 | 0.00 |
| O           |    |     |     |        |        |        |      |      |
| HETATM13494 | H5 | PRP | 954 | -1.731 | 31.649 | 15.678 | 1.00 | 0.00 |
| H           |    |     |     |        |        |        |      |      |
| HETATM13495 | C3 | PRP | 954 | -0.359 | 33.008 | 13.765 | 1.00 | 0.00 |
| C           |    |     |     |        |        |        |      |      |

|             |    |     |     |        |        |        |      |      |
|-------------|----|-----|-----|--------|--------|--------|------|------|
| HETATM13496 | H6 | PRP | 954 | 0.615  | 32.906 | 13.288 | 1.00 | 0.00 |
| H           |    |     |     |        |        |        |      |      |
| HETATM13497 | H7 | PRP | 954 | -1.112 | 32.294 | 13.430 | 1.00 | 0.00 |
| H           |    |     |     |        |        |        |      |      |
| HETATM13498 | H8 | PRP | 954 | -0.771 | 34.012 | 13.665 | 1.00 | 0.00 |
| H           |    |     |     |        |        |        |      |      |
| HETATM13499 | O1 | PRP | 955 | 31.636 | 50.717 | 12.841 | 1.00 | 0.00 |
| O           |    |     |     |        |        |        |      |      |
| HETATM13500 | H1 | PRP | 955 | 31.007 | 50.002 | 12.721 | 1.00 | 0.00 |
| H           |    |     |     |        |        |        |      |      |
| HETATM13501 | C1 | PRP | 955 | 31.075 | 51.707 | 13.623 | 1.00 | 0.00 |
| C           |    |     |     |        |        |        |      |      |
| HETATM13502 | H2 | PRP | 955 | 30.963 | 51.506 | 14.688 | 1.00 | 0.00 |
| H           |    |     |     |        |        |        |      |      |
| HETATM13503 | H3 | PRP | 955 | 31.698 | 52.600 | 13.558 | 1.00 | 0.00 |
| H           |    |     |     |        |        |        |      |      |
| HETATM13504 | C2 | PRP | 955 | 29.649 | 52.007 | 13.007 | 1.00 | 0.00 |
| C           |    |     |     |        |        |        |      |      |
| HETATM13505 | H4 | PRP | 955 | 29.082 | 52.690 | 13.640 | 1.00 | 0.00 |
| H           |    |     |     |        |        |        |      |      |
| HETATM13506 | O2 | PRP | 955 | 28.915 | 50.790 | 12.929 | 1.00 | 0.00 |
| O           |    |     |     |        |        |        |      |      |
| HETATM13507 | H5 | PRP | 955 | 27.988 | 51.025 | 12.851 | 1.00 | 0.00 |
| H           |    |     |     |        |        |        |      |      |
| HETATM13508 | C3 | PRP | 955 | 29.682 | 52.547 | 11.590 | 1.00 | 0.00 |
| C           |    |     |     |        |        |        |      |      |
| HETATM13509 | H6 | PRP | 955 | 30.272 | 51.898 | 10.944 | 1.00 | 0.00 |
| H           |    |     |     |        |        |        |      |      |
| HETATM13510 | H7 | PRP | 955 | 28.681 | 52.630 | 11.167 | 1.00 | 0.00 |
| H           |    |     |     |        |        |        |      |      |
| HETATM13511 | H8 | PRP | 955 | 30.139 | 53.537 | 11.590 | 1.00 | 0.00 |
| H           |    |     |     |        |        |        |      |      |
| HETATM13512 | O1 | PRP | 956 | -1.708 | 32.310 | 0.105  | 1.00 | 0.00 |
| O           |    |     |     |        |        |        |      |      |
| HETATM13513 | H1 | PRP | 956 | -2.638 | 32.540 | 0.160  | 1.00 | 0.00 |
| H           |    |     |     |        |        |        |      |      |
| HETATM13514 | C1 | PRP | 956 | -0.995 | 33.154 | 0.979  | 1.00 | 0.00 |
| C           |    |     |     |        |        |        |      |      |
| HETATM13515 | H2 | PRP | 956 | -1.572 | 33.336 | 1.886  | 1.00 | 0.00 |
| H           |    |     |     |        |        |        |      |      |
| HETATM13516 | H3 | PRP | 956 | 0.000  | 32.784 | 1.226  | 1.00 | 0.00 |
| H           |    |     |     |        |        |        |      |      |
| HETATM13517 | C2 | PRP | 956 | -0.733 | 34.440 | 0.191  | 1.00 | 0.00 |
| C           |    |     |     |        |        |        |      |      |
| HETATM13518 | H4 | PRP | 956 | -0.015 | 35.012 | 0.778  | 1.00 | 0.00 |
| H           |    |     |     |        |        |        |      |      |
| HETATM13519 | O2 | PRP | 956 | -1.937 | 35.230 | 0.109  | 1.00 | 0.00 |
| O           |    |     |     |        |        |        |      |      |
| HETATM13520 | H5 | PRP | 956 | -1.741 | 36.107 | -0.228 | 1.00 | 0.00 |
| H           |    |     |     |        |        |        |      |      |
| HETATM13521 | C3 | PRP | 956 | -0.098 | 34.099 | -1.158 | 1.00 | 0.00 |
| C           |    |     |     |        |        |        |      |      |
| HETATM13522 | H6 | PRP | 956 | -0.769 | 34.109 | -2.017 | 1.00 | 0.00 |
| H           |    |     |     |        |        |        |      |      |
| HETATM13523 | H7 | PRP | 956 | 0.723  | 34.797 | -1.322 | 1.00 | 0.00 |
| H           |    |     |     |        |        |        |      |      |

|             |    |     |     |        |        |        |      |      |
|-------------|----|-----|-----|--------|--------|--------|------|------|
| HETATM13524 | H8 | PRP | 956 | 0.346  | 33.104 | -1.135 | 1.00 | 0.00 |
| H           |    |     |     |        |        |        |      |      |
| HETATM13525 | O1 | PRP | 957 | 3.134  | 24.945 | 9.844  | 1.00 | 0.00 |
| O           |    |     |     |        |        |        |      |      |
| HETATM13526 | H1 | PRP | 957 | 3.522  | 24.603 | 10.652 | 1.00 | 0.00 |
| H           |    |     |     |        |        |        |      |      |
| HETATM13527 | C1 | PRP | 957 | 1.904  | 25.546 | 10.070 | 1.00 | 0.00 |
| C           |    |     |     |        |        |        |      |      |
| HETATM13528 | H2 | PRP | 957 | 1.613  | 25.241 | 11.075 | 1.00 | 0.00 |
| H           |    |     |     |        |        |        |      |      |
| HETATM13529 | H3 | PRP | 957 | 2.028  | 26.629 | 10.044 | 1.00 | 0.00 |
| H           |    |     |     |        |        |        |      |      |
| HETATM13530 | C2 | PRP | 957 | 0.862  | 25.103 | 8.991  | 1.00 | 0.00 |
| C           |    |     |     |        |        |        |      |      |
| HETATM13531 | H4 | PRP | 957 | -0.128 | 25.475 | 9.254  | 1.00 | 0.00 |
| H           |    |     |     |        |        |        |      |      |
| HETATM13532 | O2 | PRP | 957 | 0.745  | 23.715 | 8.840  | 1.00 | 0.00 |
| O           |    |     |     |        |        |        |      |      |
| HETATM13533 | H5 | PRP | 957 | 1.629  | 23.380 | 8.672  | 1.00 | 0.00 |
| H           |    |     |     |        |        |        |      |      |
| HETATM13534 | C3 | PRP | 957 | 1.136  | 25.590 | 7.609  | 1.00 | 0.00 |
| C           |    |     |     |        |        |        |      |      |
| HETATM13535 | H6 | PRP | 957 | 0.259  | 25.442 | 6.979  | 1.00 | 0.00 |
| H           |    |     |     |        |        |        |      |      |
| HETATM13536 | H7 | PRP | 957 | 1.573  | 26.586 | 7.678  | 1.00 | 0.00 |
| H           |    |     |     |        |        |        |      |      |
| HETATM13537 | H8 | PRP | 957 | 1.912  | 24.894 | 7.290  | 1.00 | 0.00 |
| H           |    |     |     |        |        |        |      |      |
| HETATM13538 | O1 | PRP | 958 | 7.648  | 27.556 | 6.373  | 1.00 | 0.00 |
| O           |    |     |     |        |        |        |      |      |
| HETATM13539 | H1 | PRP | 958 | 7.880  | 28.224 | 5.724  | 1.00 | 0.00 |
| H           |    |     |     |        |        |        |      |      |
| HETATM13540 | C1 | PRP | 958 | 7.495  | 26.348 | 5.705  | 1.00 | 0.00 |
| C           |    |     |     |        |        |        |      |      |
| HETATM13541 | H2 | PRP | 958 | 6.988  | 26.643 | 4.787  | 1.00 | 0.00 |
| H           |    |     |     |        |        |        |      |      |
| HETATM13542 | H3 | PRP | 958 | 8.478  | 25.974 | 5.419  | 1.00 | 0.00 |
| H           |    |     |     |        |        |        |      |      |
| HETATM13543 | C2 | PRP | 958 | 6.758  | 25.480 | 6.647  | 1.00 | 0.00 |
| C           |    |     |     |        |        |        |      |      |
| HETATM13544 | H4 | PRP | 958 | 5.874  | 26.041 | 6.950  | 1.00 | 0.00 |
| H           |    |     |     |        |        |        |      |      |
| HETATM13545 | O2 | PRP | 958 | 7.535  | 25.192 | 7.743  | 1.00 | 0.00 |
| O           |    |     |     |        |        |        |      |      |
| HETATM13546 | H5 | PRP | 958 | 8.147  | 25.932 | 7.749  | 1.00 | 0.00 |
| H           |    |     |     |        |        |        |      |      |
| HETATM13547 | C3 | PRP | 958 | 6.371  | 24.100 | 6.054  | 1.00 | 0.00 |
| C           |    |     |     |        |        |        |      |      |
| HETATM13548 | H6 | PRP | 958 | 7.287  | 23.608 | 5.726  | 1.00 | 0.00 |
| H           |    |     |     |        |        |        |      |      |
| HETATM13549 | H7 | PRP | 958 | 5.855  | 23.456 | 6.766  | 1.00 | 0.00 |
| H           |    |     |     |        |        |        |      |      |
| HETATM13550 | H8 | PRP | 958 | 5.736  | 24.175 | 5.171  | 1.00 | 0.00 |
| H           |    |     |     |        |        |        |      |      |
| HETATM13551 | O1 | PRP | 959 | 23.064 | 45.205 | -4.440 | 1.00 | 0.00 |
| O           |    |     |     |        |        |        |      |      |

|             |    |     |     |        |        |        |      |      |
|-------------|----|-----|-----|--------|--------|--------|------|------|
| HETATM13552 | H1 | PRP | 959 | 23.575 | 45.871 | -4.906 | 1.00 | 0.00 |
| H           |    |     |     |        |        |        |      |      |
| HETATM13553 | C1 | PRP | 959 | 23.936 | 44.126 | -4.028 | 1.00 | 0.00 |
| C           |    |     |     |        |        |        |      |      |
| HETATM13554 | H2 | PRP | 959 | 24.569 | 44.605 | -3.280 | 1.00 | 0.00 |
| H           |    |     |     |        |        |        |      |      |
| HETATM13555 | H3 | PRP | 959 | 23.431 | 43.277 | -3.568 | 1.00 | 0.00 |
| H           |    |     |     |        |        |        |      |      |
| HETATM13556 | C2 | PRP | 959 | 24.672 | 43.687 | -5.262 | 1.00 | 0.00 |
| C           |    |     |     |        |        |        |      |      |
| HETATM13557 | H4 | PRP | 959 | 25.428 | 42.984 | -4.914 | 1.00 | 0.00 |
| H           |    |     |     |        |        |        |      |      |
| HETATM13558 | O2 | PRP | 959 | 25.295 | 44.755 | -5.878 | 1.00 | 0.00 |
| O           |    |     |     |        |        |        |      |      |
| HETATM13559 | H5 | PRP | 959 | 24.573 | 45.221 | -6.306 | 1.00 | 0.00 |
| H           |    |     |     |        |        |        |      |      |
| HETATM13560 | C3 | PRP | 959 | 23.773 | 42.856 | -6.193 | 1.00 | 0.00 |
| C           |    |     |     |        |        |        |      |      |
| HETATM13561 | H6 | PRP | 959 | 23.261 | 42.167 | -5.521 | 1.00 | 0.00 |
| H           |    |     |     |        |        |        |      |      |
| HETATM13562 | H7 | PRP | 959 | 23.117 | 43.518 | -6.759 | 1.00 | 0.00 |
| H           |    |     |     |        |        |        |      |      |
| HETATM13563 | H8 | PRP | 959 | 24.397 | 42.302 | -6.895 | 1.00 | 0.00 |
| H           |    |     |     |        |        |        |      |      |
| HETATM13564 | O1 | PRP | 960 | 13.758 | 29.033 | -1.380 | 1.00 | 0.00 |
| O           |    |     |     |        |        |        |      |      |
| HETATM13565 | H1 | PRP | 960 | 14.376 | 28.299 | -1.412 | 1.00 | 0.00 |
| H           |    |     |     |        |        |        |      |      |
| HETATM13566 | C1 | PRP | 960 | 14.459 | 30.060 | -0.811 | 1.00 | 0.00 |
| C           |    |     |     |        |        |        |      |      |
| HETATM13567 | H2 | PRP | 960 | 13.841 | 30.472 | -0.014 | 1.00 | 0.00 |
| H           |    |     |     |        |        |        |      |      |
| HETATM13568 | H3 | PRP | 960 | 15.412 | 29.647 | -0.479 | 1.00 | 0.00 |
| H           |    |     |     |        |        |        |      |      |
| HETATM13569 | C2 | PRP | 960 | 14.826 | 31.101 | -1.925 | 1.00 | 0.00 |
| C           |    |     |     |        |        |        |      |      |
| HETATM13570 | H4 | PRP | 960 | 13.975 | 31.471 | -2.496 | 1.00 | 0.00 |
| H           |    |     |     |        |        |        |      |      |
| HETATM13571 | O2 | PRP | 960 | 15.794 | 30.556 | -2.824 | 1.00 | 0.00 |
| O           |    |     |     |        |        |        |      |      |
| HETATM13572 | H5 | PRP | 960 | 15.534 | 29.728 | -3.234 | 1.00 | 0.00 |
| H           |    |     |     |        |        |        |      |      |
| HETATM13573 | C3 | PRP | 960 | 15.493 | 32.364 | -1.252 | 1.00 | 0.00 |
| C           |    |     |     |        |        |        |      |      |
| HETATM13574 | H6 | PRP | 960 | 14.932 | 32.886 | -0.477 | 1.00 | 0.00 |
| H           |    |     |     |        |        |        |      |      |
| HETATM13575 | H7 | PRP | 960 | 16.454 | 32.012 | -0.876 | 1.00 | 0.00 |
| H           |    |     |     |        |        |        |      |      |
| HETATM13576 | H8 | PRP | 960 | 15.692 | 33.087 | -2.044 | 1.00 | 0.00 |
| H           |    |     |     |        |        |        |      |      |
| HETATM13577 | O1 | PRP | 961 | 24.440 | 38.106 | -6.548 | 1.00 | 0.00 |
| O           |    |     |     |        |        |        |      |      |
| HETATM13578 | H1 | PRP | 961 | 25.264 | 37.845 | -6.965 | 1.00 | 0.00 |
| H           |    |     |     |        |        |        |      |      |
| HETATM13579 | C1 | PRP | 961 | 24.863 | 38.974 | -5.531 | 1.00 | 0.00 |
| C           |    |     |     |        |        |        |      |      |



|             |    |     |     |        |        |        |      |      |
|-------------|----|-----|-----|--------|--------|--------|------|------|
| HETATM13580 | H2 | PRP | 961 | 25.534 | 39.685 | -6.013 | 1.00 | 0.00 |
| H           |    |     |     |        |        |        |      |      |
| HETATM13581 | H3 | PRP | 961 | 24.089 | 39.596 | -5.083 | 1.00 | 0.00 |
| H           |    |     |     |        |        |        |      |      |
| HETATM13582 | C2 | PRP | 961 | 25.626 | 38.374 | -4.268 | 1.00 | 0.00 |
| C           |    |     |     |        |        |        |      |      |
| HETATM13583 | H4 | PRP | 961 | 26.486 | 37.809 | -4.627 | 1.00 | 0.00 |
| H           |    |     |     |        |        |        |      |      |
| HETATM13584 | O2 | PRP | 961 | 24.873 | 37.472 | -3.522 | 1.00 | 0.00 |
| O           |    |     |     |        |        |        |      |      |
| HETATM13585 | H5 | PRP | 961 | 23.948 | 37.608 | -3.739 | 1.00 | 0.00 |
| H           |    |     |     |        |        |        |      |      |
| HETATM13586 | C3 | PRP | 961 | 25.976 | 39.435 | -3.301 | 1.00 | 0.00 |
| C           |    |     |     |        |        |        |      |      |
| HETATM13587 | H6 | PRP | 961 | 26.977 | 39.760 | -3.582 | 1.00 | 0.00 |
| H           |    |     |     |        |        |        |      |      |
| HETATM13588 | H7 | PRP | 961 | 25.407 | 40.342 | -3.507 | 1.00 | 0.00 |
| H           |    |     |     |        |        |        |      |      |
| HETATM13589 | H8 | PRP | 961 | 25.790 | 39.066 | -2.292 | 1.00 | 0.00 |
| H           |    |     |     |        |        |        |      |      |
| HETATM13590 | O1 | PRP | 962 | 12.676 | 24.578 | 2.093  | 1.00 | 0.00 |
| O           |    |     |     |        |        |        |      |      |
| HETATM13591 | H1 | PRP | 962 | 12.501 | 23.851 | 2.694  | 1.00 | 0.00 |
| H           |    |     |     |        |        |        |      |      |
| HETATM13592 | C1 | PRP | 962 | 12.342 | 25.793 | 2.618  | 1.00 | 0.00 |
| C           |    |     |     |        |        |        |      |      |
| HETATM13593 | H2 | PRP | 962 | 11.255 | 25.787 | 2.695  | 1.00 | 0.00 |
| H           |    |     |     |        |        |        |      |      |
| HETATM13594 | H3 | PRP | 962 | 12.810 | 25.862 | 3.600  | 1.00 | 0.00 |
| H           |    |     |     |        |        |        |      |      |
| HETATM13595 | C2 | PRP | 962 | 12.827 | 26.882 | 1.675  | 1.00 | 0.00 |
| C           |    |     |     |        |        |        |      |      |
| HETATM13596 | H4 | PRP | 962 | 12.831 | 26.631 | 0.614  | 1.00 | 0.00 |
| H           |    |     |     |        |        |        |      |      |
| HETATM13597 | O2 | PRP | 962 | 14.107 | 27.282 | 2.160  | 1.00 | 0.00 |
| O           |    |     |     |        |        |        |      |      |
| HETATM13598 | H5 | PRP | 962 | 14.690 | 26.890 | 1.506  | 1.00 | 0.00 |
| H           |    |     |     |        |        |        |      |      |
| HETATM13599 | C3 | PRP | 962 | 12.039 | 28.177 | 1.789  | 1.00 | 0.00 |
| C           |    |     |     |        |        |        |      |      |
| HETATM13600 | H6 | PRP | 962 | 10.996 | 27.964 | 1.556  | 1.00 | 0.00 |
| H           |    |     |     |        |        |        |      |      |
| HETATM13601 | H7 | PRP | 962 | 12.198 | 28.531 | 2.808  | 1.00 | 0.00 |
| H           |    |     |     |        |        |        |      |      |
| HETATM13602 | H8 | PRP | 962 | 12.338 | 28.972 | 1.106  | 1.00 | 0.00 |
| H           |    |     |     |        |        |        |      |      |
| HETATM13603 | O1 | PRP | 963 | 4.864  | 28.459 | 11.525 | 1.00 | 0.00 |
| O           |    |     |     |        |        |        |      |      |
| HETATM13604 | H1 | PRP | 963 | 5.126  | 27.925 | 12.278 | 1.00 | 0.00 |
| H           |    |     |     |        |        |        |      |      |
| HETATM13605 | C1 | PRP | 963 | 5.180  | 27.719 | 10.383 | 1.00 | 0.00 |
| C           |    |     |     |        |        |        |      |      |
| HETATM13606 | H2 | PRP | 963 | 4.546  | 26.838 | 10.274 | 1.00 | 0.00 |
| H           |    |     |     |        |        |        |      |      |
| HETATM13607 | H3 | PRP | 963 | 5.014  | 28.295 | 9.473  | 1.00 | 0.00 |
| H           |    |     |     |        |        |        |      |      |

|             |    |     |     |        |        |        |      |      |
|-------------|----|-----|-----|--------|--------|--------|------|------|
| HETATM13608 | C2 | PRP | 963 | 6.645  | 27.197 | 10.505 | 1.00 | 0.00 |
| C           |    |     |     |        |        |        |      |      |
| HETATM13609 | H4 | PRP | 963 | 6.738  | 26.477 | 9.692  | 1.00 | 0.00 |
| H           |    |     |     |        |        |        |      |      |
| HETATM13610 | O2 | PRP | 963 | 6.734  | 26.504 | 11.779 | 1.00 | 0.00 |
| O           |    |     |     |        |        |        |      |      |
| HETATM13611 | H5 | PRP | 963 | 7.311  | 25.795 | 11.486 | 1.00 | 0.00 |
| H           |    |     |     |        |        |        |      |      |
| HETATM13612 | C3 | PRP | 963 | 7.766  | 28.163 | 10.387 | 1.00 | 0.00 |
| C           |    |     |     |        |        |        |      |      |
| HETATM13613 | H6 | PRP | 963 | 7.764  | 28.776 | 11.288 | 1.00 | 0.00 |
| H           |    |     |     |        |        |        |      |      |
| HETATM13614 | H7 | PRP | 963 | 8.716  | 27.710 | 10.105 | 1.00 | 0.00 |
| H           |    |     |     |        |        |        |      |      |
| HETATM13615 | H8 | PRP | 963 | 7.542  | 28.855 | 9.575  | 1.00 | 0.00 |
| H           |    |     |     |        |        |        |      |      |
| HETATM13616 | O1 | PRP | 964 | 25.582 | 24.719 | -3.017 | 1.00 | 0.00 |
| O           |    |     |     |        |        |        |      |      |
| HETATM13617 | H1 | PRP | 964 | 25.733 | 25.461 | -3.607 | 1.00 | 0.00 |
| H           |    |     |     |        |        |        |      |      |
| HETATM13618 | C1 | PRP | 964 | 24.256 | 24.803 | -2.469 | 1.00 | 0.00 |
| C           |    |     |     |        |        |        |      |      |
| HETATM13619 | H2 | PRP | 964 | 23.639 | 25.156 | -3.295 | 1.00 | 0.00 |
| H           |    |     |     |        |        |        |      |      |
| HETATM13620 | H3 | PRP | 964 | 23.744 | 23.876 | -2.214 | 1.00 | 0.00 |
| H           |    |     |     |        |        |        |      |      |
| HETATM13621 | C2 | PRP | 964 | 24.184 | 25.772 | -1.275 | 1.00 | 0.00 |
| C           |    |     |     |        |        |        |      |      |
| HETATM13622 | H4 | PRP | 964 | 24.069 | 26.791 | -1.644 | 1.00 | 0.00 |
| H           |    |     |     |        |        |        |      |      |
| HETATM13623 | O2 | PRP | 964 | 25.338 | 25.673 | -0.505 | 1.00 | 0.00 |
| O           |    |     |     |        |        |        |      |      |
| HETATM13624 | H5 | PRP | 964 | 26.088 | 25.295 | -0.970 | 1.00 | 0.00 |
| H           |    |     |     |        |        |        |      |      |
| HETATM13625 | C3 | PRP | 964 | 22.904 | 25.600 | -0.409 | 1.00 | 0.00 |
| C           |    |     |     |        |        |        |      |      |
| HETATM13626 | H6 | PRP | 964 | 23.080 | 26.246 | 0.451  | 1.00 | 0.00 |
| H           |    |     |     |        |        |        |      |      |
| HETATM13627 | H7 | PRP | 964 | 22.010 | 25.988 | -0.897 | 1.00 | 0.00 |
| H           |    |     |     |        |        |        |      |      |
| HETATM13628 | H8 | PRP | 964 | 22.734 | 24.570 | -0.095 | 1.00 | 0.00 |
| H           |    |     |     |        |        |        |      |      |
| HETATM13629 | O1 | PRP | 965 | 8.842  | 24.789 | 11.966 | 1.00 | 0.00 |
| O           |    |     |     |        |        |        |      |      |
| HETATM13630 | H1 | PRP | 965 | 8.716  | 25.065 | 12.877 | 1.00 | 0.00 |
| H           |    |     |     |        |        |        |      |      |
| HETATM13631 | C1 | PRP | 965 | 8.479  | 23.470 | 11.947 | 1.00 | 0.00 |
| C           |    |     |     |        |        |        |      |      |
| HETATM13632 | H2 | PRP | 965 | 7.418  | 23.308 | 12.136 | 1.00 | 0.00 |
| H           |    |     |     |        |        |        |      |      |
| HETATM13633 | H3 | PRP | 965 | 8.766  | 23.047 | 10.984 | 1.00 | 0.00 |
| H           |    |     |     |        |        |        |      |      |
| HETATM13634 | C2 | PRP | 965 | 9.293  | 22.792 | 12.971 | 1.00 | 0.00 |
| C           |    |     |     |        |        |        |      |      |
| HETATM13635 | H4 | PRP | 965 | 9.049  | 21.730 | 12.983 | 1.00 | 0.00 |
| H           |    |     |     |        |        |        |      |      |

|             |    |     |     |        |        |        |      |      |
|-------------|----|-----|-----|--------|--------|--------|------|------|
| HETATM13636 | O2 | PRP | 965 | 8.968  | 23.261 | 14.298 | 1.00 | 0.00 |
| O           |    |     |     |        |        |        |      |      |
| HETATM13637 | H5 | PRP | 965 | 8.929  | 22.512 | 14.897 | 1.00 | 0.00 |
| H           |    |     |     |        |        |        |      |      |
| HETATM13638 | C3 | PRP | 965 | 10.824 | 22.841 | 12.815 | 1.00 | 0.00 |
| C           |    |     |     |        |        |        |      |      |
| HETATM13639 | H6 | PRP | 965 | 11.251 | 22.056 | 13.438 | 1.00 | 0.00 |
| H           |    |     |     |        |        |        |      |      |
| HETATM13640 | H7 | PRP | 965 | 11.145 | 22.538 | 11.818 | 1.00 | 0.00 |
| H           |    |     |     |        |        |        |      |      |
| HETATM13641 | H8 | PRP | 965 | 11.297 | 23.782 | 13.095 | 1.00 | 0.00 |
| H           |    |     |     |        |        |        |      |      |
| HETATM13642 | O1 | PRP | 966 | 1.362  | 34.683 | 3.558  | 1.00 | 0.00 |
| O           |    |     |     |        |        |        |      |      |
| HETATM13643 | H1 | PRP | 966 | 1.611  | 35.567 | 3.840  | 1.00 | 0.00 |
| H           |    |     |     |        |        |        |      |      |
| HETATM13644 | C1 | PRP | 966 | 0.135  | 34.266 | 4.116  | 1.00 | 0.00 |
| C           |    |     |     |        |        |        |      |      |
| HETATM13645 | H2 | PRP | 966 | -0.710 | 34.909 | 3.873  | 1.00 | 0.00 |
| H           |    |     |     |        |        |        |      |      |
| HETATM13646 | H3 | PRP | 966 | -0.098 | 33.262 | 3.761  | 1.00 | 0.00 |
| H           |    |     |     |        |        |        |      |      |
| HETATM13647 | C2 | PRP | 966 | 0.111  | 34.181 | 5.679  | 1.00 | 0.00 |
| C           |    |     |     |        |        |        |      |      |
| HETATM13648 | H4 | PRP | 966 | -0.831 | 33.739 | 6.004  | 1.00 | 0.00 |
| H           |    |     |     |        |        |        |      |      |
| HETATM13649 | O2 | PRP | 966 | 0.168  | 35.524 | 6.242  | 1.00 | 0.00 |
| O           |    |     |     |        |        |        |      |      |
| HETATM13650 | H5 | PRP | 966 | 0.602  | 35.437 | 7.094  | 1.00 | 0.00 |
| H           |    |     |     |        |        |        |      |      |
| HETATM13651 | C3 | PRP | 966 | 1.359  | 33.590 | 6.345  | 1.00 | 0.00 |
| C           |    |     |     |        |        |        |      |      |
| HETATM13652 | H6 | PRP | 966 | 2.262  | 34.129 | 6.059  | 1.00 | 0.00 |
| H           |    |     |     |        |        |        |      |      |
| HETATM13653 | H7 | PRP | 966 | 1.337  | 33.722 | 7.427  | 1.00 | 0.00 |
| H           |    |     |     |        |        |        |      |      |
| HETATM13654 | H8 | PRP | 966 | 1.500  | 32.533 | 6.116  | 1.00 | 0.00 |
| H           |    |     |     |        |        |        |      |      |
| HETATM13655 | O1 | PRP | 967 | 7.940  | 24.377 | -6.028 | 1.00 | 0.00 |
| O           |    |     |     |        |        |        |      |      |
| HETATM13656 | H1 | PRP | 967 | 7.707  | 24.032 | -6.893 | 1.00 | 0.00 |
| H           |    |     |     |        |        |        |      |      |
| HETATM13657 | C1 | PRP | 967 | 9.115  | 25.197 | -6.250 | 1.00 | 0.00 |
| C           |    |     |     |        |        |        |      |      |
| HETATM13658 | H2 | PRP | 967 | 9.711  | 24.735 | -7.037 | 1.00 | 0.00 |
| H           |    |     |     |        |        |        |      |      |
| HETATM13659 | H3 | PRP | 967 | 8.664  | 26.086 | -6.692 | 1.00 | 0.00 |
| H           |    |     |     |        |        |        |      |      |
| HETATM13660 | C2 | PRP | 967 | 9.864  | 25.672 | -5.069 | 1.00 | 0.00 |
| C           |    |     |     |        |        |        |      |      |
| HETATM13661 | H4 | PRP | 967 | 10.689 | 26.347 | -5.298 | 1.00 | 0.00 |
| H           |    |     |     |        |        |        |      |      |
| HETATM13662 | O2 | PRP | 967 | 10.364 | 24.449 | -4.405 | 1.00 | 0.00 |
| O           |    |     |     |        |        |        |      |      |
| HETATM13663 | H5 | PRP | 967 | 9.613  | 23.851 | -4.391 | 1.00 | 0.00 |
| H           |    |     |     |        |        |        |      |      |

|             |    |     |     |        |        |        |      |      |
|-------------|----|-----|-----|--------|--------|--------|------|------|
| HETATM13664 | C3 | PRP | 967 | 8.924  | 26.299 | -4.121 | 1.00 | 0.00 |
| C           |    |     |     |        |        |        |      |      |
| HETATM13665 | H6 | PRP | 967 | 8.415  | 25.543 | -3.523 | 1.00 | 0.00 |
| H           |    |     |     |        |        |        |      |      |
| HETATM13666 | H7 | PRP | 967 | 9.550  | 26.932 | -3.493 | 1.00 | 0.00 |
| H           |    |     |     |        |        |        |      |      |
| HETATM13667 | H8 | PRP | 967 | 8.229  | 26.999 | -4.586 | 1.00 | 0.00 |
| H           |    |     |     |        |        |        |      |      |
| HETATM13668 | O1 | PRP | 968 | 1.563  | 23.014 | -1.970 | 1.00 | 0.00 |
| O           |    |     |     |        |        |        |      |      |
| HETATM13669 | H1 | PRP | 968 | 1.539  | 23.798 | -1.416 | 1.00 | 0.00 |
| H           |    |     |     |        |        |        |      |      |
| HETATM13670 | C1 | PRP | 968 | 0.395  | 22.276 | -1.792 | 1.00 | 0.00 |
| C           |    |     |     |        |        |        |      |      |
| HETATM13671 | H2 | PRP | 968 | -0.511 | 22.820 | -2.063 | 1.00 | 0.00 |
| H           |    |     |     |        |        |        |      |      |
| HETATM13672 | H3 | PRP | 968 | 0.373  | 21.466 | -2.522 | 1.00 | 0.00 |
| H           |    |     |     |        |        |        |      |      |
| HETATM13673 | C2 | PRP | 968 | 0.390  | 21.669 | -0.421 | 1.00 | 0.00 |
| C           |    |     |     |        |        |        |      |      |
| HETATM13674 | H4 | PRP | 968 | 0.671  | 22.413 | 0.325  | 1.00 | 0.00 |
| H           |    |     |     |        |        |        |      |      |
| HETATM13675 | O2 | PRP | 968 | 1.276  | 20.581 | -0.278 | 1.00 | 0.00 |
| O           |    |     |     |        |        |        |      |      |
| HETATM13676 | H5 | PRP | 968 | 1.364  | 20.328 | 0.644  | 1.00 | 0.00 |
| H           |    |     |     |        |        |        |      |      |
| HETATM13677 | C3 | PRP | 968 | -1.028 | 21.175 | -0.060 | 1.00 | 0.00 |
| C           |    |     |     |        |        |        |      |      |
| HETATM13678 | H6 | PRP | 968 | -1.063 | 20.650 | 0.894  | 1.00 | 0.00 |
| H           |    |     |     |        |        |        |      |      |
| HETATM13679 | H7 | PRP | 968 | -1.555 | 22.116 | 0.096  | 1.00 | 0.00 |
| H           |    |     |     |        |        |        |      |      |
| HETATM13680 | H8 | PRP | 968 | -1.485 | 20.628 | -0.886 | 1.00 | 0.00 |
| H           |    |     |     |        |        |        |      |      |
| HETATM13681 | O1 | PRP | 969 | -4.902 | 31.901 | 19.890 | 1.00 | 0.00 |
| O           |    |     |     |        |        |        |      |      |
| HETATM13682 | H1 | PRP | 969 | -4.759 | 30.952 | 19.880 | 1.00 | 0.00 |
| H           |    |     |     |        |        |        |      |      |
| HETATM13683 | C1 | PRP | 969 | -6.032 | 32.164 | 19.056 | 1.00 | 0.00 |
| C           |    |     |     |        |        |        |      |      |
| HETATM13684 | H2 | PRP | 969 | -5.719 | 31.900 | 18.047 | 1.00 | 0.00 |
| H           |    |     |     |        |        |        |      |      |
| HETATM13685 | H3 | PRP | 969 | -6.791 | 31.417 | 19.289 | 1.00 | 0.00 |
| H           |    |     |     |        |        |        |      |      |
| HETATM13686 | C2 | PRP | 969 | -6.587 | 33.651 | 19.136 | 1.00 | 0.00 |
| C           |    |     |     |        |        |        |      |      |
| HETATM13687 | H4 | PRP | 969 | -5.811 | 34.309 | 19.527 | 1.00 | 0.00 |
| H           |    |     |     |        |        |        |      |      |
| HETATM13688 | O2 | PRP | 969 | -7.640 | 33.608 | 20.049 | 1.00 | 0.00 |
| O           |    |     |     |        |        |        |      |      |
| HETATM13689 | H5 | PRP | 969 | -7.265 | 33.218 | 20.842 | 1.00 | 0.00 |
| H           |    |     |     |        |        |        |      |      |
| HETATM13690 | C3 | PRP | 969 | -7.109 | 34.080 | 17.746 | 1.00 | 0.00 |
| C           |    |     |     |        |        |        |      |      |
| HETATM13691 | H6 | PRP | 969 | -6.327 | 34.392 | 17.054 | 1.00 | 0.00 |
| H           |    |     |     |        |        |        |      |      |

|             |    |     |     |        |        |        |      |      |
|-------------|----|-----|-----|--------|--------|--------|------|------|
| HETATM13692 | H7 | PRP | 969 | -7.718 | 33.307 | 17.278 | 1.00 | 0.00 |
| H           |    |     |     |        |        |        |      |      |
| HETATM13693 | H8 | PRP | 969 | -7.728 | 34.971 | 17.856 | 1.00 | 0.00 |
| H           |    |     |     |        |        |        |      |      |
| HETATM13694 | O1 | PRP | 970 | 17.476 | 46.071 | 22.466 | 1.00 | 0.00 |
| O           |    |     |     |        |        |        |      |      |
| HETATM13695 | H1 | PRP | 970 | 17.883 | 45.240 | 22.210 | 1.00 | 0.00 |
| H           |    |     |     |        |        |        |      |      |
| HETATM13696 | C1 | PRP | 970 | 16.038 | 45.845 | 22.353 | 1.00 | 0.00 |
| C           |    |     |     |        |        |        |      |      |
| HETATM13697 | H2 | PRP | 970 | 15.610 | 45.309 | 23.200 | 1.00 | 0.00 |
| H           |    |     |     |        |        |        |      |      |
| HETATM13698 | H3 | PRP | 970 | 15.502 | 46.757 | 22.090 | 1.00 | 0.00 |
| H           |    |     |     |        |        |        |      |      |
| HETATM13699 | C2 | PRP | 970 | 15.831 | 44.776 | 21.294 | 1.00 | 0.00 |
| C           |    |     |     |        |        |        |      |      |
| HETATM13700 | H4 | PRP | 970 | 16.337 | 43.842 | 21.539 | 1.00 | 0.00 |
| H           |    |     |     |        |        |        |      |      |
| HETATM13701 | O2 | PRP | 970 | 16.270 | 45.328 | 20.051 | 1.00 | 0.00 |
| O           |    |     |     |        |        |        |      |      |
| HETATM13702 | H5 | PRP | 970 | 17.037 | 45.901 | 20.119 | 1.00 | 0.00 |
| H           |    |     |     |        |        |        |      |      |
| HETATM13703 | C3 | PRP | 970 | 14.323 | 44.480 | 21.175 | 1.00 | 0.00 |
| C           |    |     |     |        |        |        |      |      |
| HETATM13704 | H6 | PRP | 970 | 14.126 | 43.985 | 20.224 | 1.00 | 0.00 |
| H           |    |     |     |        |        |        |      |      |
| HETATM13705 | H7 | PRP | 970 | 14.050 | 43.918 | 22.068 | 1.00 | 0.00 |
| H           |    |     |     |        |        |        |      |      |
| HETATM13706 | H8 | PRP | 970 | 13.797 | 45.427 | 21.298 | 1.00 | 0.00 |
| H           |    |     |     |        |        |        |      |      |
| HETATM13707 | O1 | PRP | 971 | 12.953 | 39.699 | 3.679  | 1.00 | 0.00 |
| O           |    |     |     |        |        |        |      |      |
| HETATM13708 | H1 | PRP | 971 | 12.326 | 39.016 | 3.929  | 1.00 | 0.00 |
| H           |    |     |     |        |        |        |      |      |
| HETATM13709 | C1 | PRP | 971 | 14.216 | 39.146 | 3.845  | 1.00 | 0.00 |
| C           |    |     |     |        |        |        |      |      |
| HETATM13710 | H2 | PRP | 971 | 14.228 | 38.152 | 3.398  | 1.00 | 0.00 |
| H           |    |     |     |        |        |        |      |      |
| HETATM13711 | H3 | PRP | 971 | 14.914 | 39.684 | 3.203  | 1.00 | 0.00 |
| H           |    |     |     |        |        |        |      |      |
| HETATM13712 | C2 | PRP | 971 | 14.715 | 39.000 | 5.241  | 1.00 | 0.00 |
| C           |    |     |     |        |        |        |      |      |
| HETATM13713 | H4 | PRP | 971 | 15.705 | 38.544 | 5.216  | 1.00 | 0.00 |
| H           |    |     |     |        |        |        |      |      |
| HETATM13714 | O2 | PRP | 971 | 13.791 | 38.207 | 5.954  | 1.00 | 0.00 |
| O           |    |     |     |        |        |        |      |      |
| HETATM13715 | H5 | PRP | 971 | 12.913 | 38.562 | 5.798  | 1.00 | 0.00 |
| H           |    |     |     |        |        |        |      |      |
| HETATM13716 | C3 | PRP | 971 | 14.897 | 40.302 | 5.885  | 1.00 | 0.00 |
| C           |    |     |     |        |        |        |      |      |
| HETATM13717 | H6 | PRP | 971 | 13.886 | 40.648 | 6.101  | 1.00 | 0.00 |
| H           |    |     |     |        |        |        |      |      |
| HETATM13718 | H7 | PRP | 971 | 15.390 | 40.202 | 6.852  | 1.00 | 0.00 |
| H           |    |     |     |        |        |        |      |      |
| HETATM13719 | H8 | PRP | 971 | 15.402 | 41.034 | 5.256  | 1.00 | 0.00 |
| H           |    |     |     |        |        |        |      |      |

|             |    |     |     |        |        |        |      |      |
|-------------|----|-----|-----|--------|--------|--------|------|------|
| HETATM13720 | O1 | PRP | 972 | 31.511 | 55.695 | 19.239 | 1.00 | 0.00 |
| O           |    |     |     |        |        |        |      |      |
| HETATM13721 | H1 | PRP | 972 | 30.610 | 55.900 | 19.502 | 1.00 | 0.00 |
| H           |    |     |     |        |        |        |      |      |
| HETATM13722 | C1 | PRP | 972 | 32.158 | 56.861 | 18.827 | 1.00 | 0.00 |
| C           |    |     |     |        |        |        |      |      |
| HETATM13723 | H2 | PRP | 972 | 31.664 | 57.339 | 17.980 | 1.00 | 0.00 |
| H           |    |     |     |        |        |        |      |      |
| HETATM13724 | H3 | PRP | 972 | 32.110 | 57.546 | 19.673 | 1.00 | 0.00 |
| H           |    |     |     |        |        |        |      |      |
| HETATM13725 | C2 | PRP | 972 | 33.596 | 56.564 | 18.473 | 1.00 | 0.00 |
| C           |    |     |     |        |        |        |      |      |
| HETATM13726 | H4 | PRP | 972 | 33.726 | 55.875 | 17.638 | 1.00 | 0.00 |
| H           |    |     |     |        |        |        |      |      |
| HETATM13727 | O2 | PRP | 972 | 34.061 | 55.980 | 19.701 | 1.00 | 0.00 |
| O           |    |     |     |        |        |        |      |      |
| HETATM13728 | H5 | PRP | 972 | 33.322 | 55.459 | 20.022 | 1.00 | 0.00 |
| H           |    |     |     |        |        |        |      |      |
| HETATM13729 | C3 | PRP | 972 | 34.381 | 57.798 | 18.123 | 1.00 | 0.00 |
| C           |    |     |     |        |        |        |      |      |
| HETATM13730 | H6 | PRP | 972 | 33.879 | 58.329 | 17.315 | 1.00 | 0.00 |
| H           |    |     |     |        |        |        |      |      |
| HETATM13731 | H7 | PRP | 972 | 34.226 | 58.593 | 18.853 | 1.00 | 0.00 |
| H           |    |     |     |        |        |        |      |      |
| HETATM13732 | H8 | PRP | 972 | 35.442 | 57.588 | 17.982 | 1.00 | 0.00 |
| H           |    |     |     |        |        |        |      |      |
| HETATM13733 | O1 | PRP | 973 | 13.070 | 38.207 | 12.636 | 1.00 | 0.00 |
| O           |    |     |     |        |        |        |      |      |
| HETATM13734 | H1 | PRP | 973 | 14.009 | 38.118 | 12.812 | 1.00 | 0.00 |
| H           |    |     |     |        |        |        |      |      |
| HETATM13735 | C1 | PRP | 973 | 13.046 | 38.757 | 11.305 | 1.00 | 0.00 |
| C           |    |     |     |        |        |        |      |      |
| HETATM13736 | H2 | PRP | 973 | 12.254 | 38.177 | 10.830 | 1.00 | 0.00 |
| H           |    |     |     |        |        |        |      |      |
| HETATM13737 | H3 | PRP | 973 | 12.818 | 39.814 | 11.440 | 1.00 | 0.00 |
| H           |    |     |     |        |        |        |      |      |
| HETATM13738 | C2 | PRP | 973 | 14.385 | 38.472 | 10.561 | 1.00 | 0.00 |
| C           |    |     |     |        |        |        |      |      |
| HETATM13739 | H4 | PRP | 973 | 14.494 | 37.390 | 10.489 | 1.00 | 0.00 |
| H           |    |     |     |        |        |        |      |      |
| HETATM13740 | O2 | PRP | 973 | 15.425 | 39.035 | 11.342 | 1.00 | 0.00 |
| O           |    |     |     |        |        |        |      |      |
| HETATM13741 | H5 | PRP | 973 | 15.181 | 39.861 | 11.766 | 1.00 | 0.00 |
| H           |    |     |     |        |        |        |      |      |
| HETATM13742 | C3 | PRP | 973 | 14.441 | 39.218 | 9.276  | 1.00 | 0.00 |
| C           |    |     |     |        |        |        |      |      |
| HETATM13743 | H6 | PRP | 973 | 15.467 | 39.179 | 8.912  | 1.00 | 0.00 |
| H           |    |     |     |        |        |        |      |      |
| HETATM13744 | H7 | PRP | 973 | 13.784 | 38.705 | 8.574  | 1.00 | 0.00 |
| H           |    |     |     |        |        |        |      |      |
| HETATM13745 | H8 | PRP | 973 | 14.155 | 40.261 | 9.413  | 1.00 | 0.00 |
| H           |    |     |     |        |        |        |      |      |
| HETATM13746 | O1 | PRP | 974 | 18.578 | 49.523 | 10.160 | 1.00 | 0.00 |
| O           |    |     |     |        |        |        |      |      |
| HETATM13747 | H1 | PRP | 974 | 18.618 | 50.290 | 9.585  | 1.00 | 0.00 |
| H           |    |     |     |        |        |        |      |      |

|             |    |     |     |        |        |        |      |      |
|-------------|----|-----|-----|--------|--------|--------|------|------|
| HETATM13748 | C1 | PRP | 974 | 17.184 | 49.300 | 10.495 | 1.00 | 0.00 |
| C           |    |     |     |        |        |        |      |      |
| HETATM13749 | H2 | PRP | 974 | 16.716 | 48.848 | 9.620  | 1.00 | 0.00 |
| H           |    |     |     |        |        |        |      |      |
| HETATM13750 | H3 | PRP | 974 | 17.018 | 48.517 | 11.235 | 1.00 | 0.00 |
| H           |    |     |     |        |        |        |      |      |
| HETATM13751 | C2 | PRP | 974 | 16.498 | 50.607 | 10.966 | 1.00 | 0.00 |
| C           |    |     |     |        |        |        |      |      |
| HETATM13752 | H4 | PRP | 974 | 15.566 | 50.319 | 11.452 | 1.00 | 0.00 |
| H           |    |     |     |        |        |        |      |      |
| HETATM13753 | O2 | PRP | 974 | 16.415 | 51.402 | 9.771  | 1.00 | 0.00 |
| O           |    |     |     |        |        |        |      |      |
| HETATM13754 | H5 | PRP | 974 | 16.235 | 52.331 | 9.932  | 1.00 | 0.00 |
| H           |    |     |     |        |        |        |      |      |
| HETATM13755 | C3 | PRP | 974 | 17.207 | 51.349 | 12.091 | 1.00 | 0.00 |
| C           |    |     |     |        |        |        |      |      |
| HETATM13756 | H6 | PRP | 974 | 17.426 | 50.624 | 12.874 | 1.00 | 0.00 |
| H           |    |     |     |        |        |        |      |      |
| HETATM13757 | H7 | PRP | 974 | 18.138 | 51.727 | 11.669 | 1.00 | 0.00 |
| H           |    |     |     |        |        |        |      |      |
| HETATM13758 | H8 | PRP | 974 | 16.577 | 52.138 | 12.503 | 1.00 | 0.00 |
| H           |    |     |     |        |        |        |      |      |
| HETATM13759 | O1 | PRP | 975 | 44.518 | 48.662 | 17.971 | 1.00 | 0.00 |
| O           |    |     |     |        |        |        |      |      |
| HETATM13760 | H1 | PRP | 975 | 44.736 | 48.928 | 17.074 | 1.00 | 0.00 |
| H           |    |     |     |        |        |        |      |      |
| HETATM13761 | C1 | PRP | 975 | 43.224 | 48.774 | 18.338 | 1.00 | 0.00 |
| C           |    |     |     |        |        |        |      |      |
| HETATM13762 | H2 | PRP | 975 | 42.908 | 49.810 | 18.455 | 1.00 | 0.00 |
| H           |    |     |     |        |        |        |      |      |
| HETATM13763 | H3 | PRP | 975 | 42.664 | 48.383 | 17.489 | 1.00 | 0.00 |
| H           |    |     |     |        |        |        |      |      |
| HETATM13764 | C2 | PRP | 975 | 42.855 | 48.034 | 19.670 | 1.00 | 0.00 |
| C           |    |     |     |        |        |        |      |      |
| HETATM13765 | H4 | PRP | 975 | 41.792 | 48.058 | 19.913 | 1.00 | 0.00 |
| H           |    |     |     |        |        |        |      |      |
| HETATM13766 | O2 | PRP | 975 | 43.676 | 48.620 | 20.716 | 1.00 | 0.00 |
| O           |    |     |     |        |        |        |      |      |
| HETATM13767 | H5 | PRP | 975 | 43.504 | 49.565 | 20.722 | 1.00 | 0.00 |
| H           |    |     |     |        |        |        |      |      |
| HETATM13768 | C3 | PRP | 975 | 43.396 | 46.602 | 19.613 | 1.00 | 0.00 |
| C           |    |     |     |        |        |        |      |      |
| HETATM13769 | H6 | PRP | 975 | 44.445 | 46.723 | 19.342 | 1.00 | 0.00 |
| H           |    |     |     |        |        |        |      |      |
| HETATM13770 | H7 | PRP | 975 | 43.323 | 46.133 | 20.594 | 1.00 | 0.00 |
| H           |    |     |     |        |        |        |      |      |
| HETATM13771 | H8 | PRP | 975 | 43.025 | 46.014 | 18.774 | 1.00 | 0.00 |
| H           |    |     |     |        |        |        |      |      |
| HETATM13772 | O1 | PRP | 976 | 17.990 | 58.993 | 10.505 | 1.00 | 0.00 |
| O           |    |     |     |        |        |        |      |      |
| HETATM13773 | H1 | PRP | 976 | 18.875 | 59.363 | 10.512 | 1.00 | 0.00 |
| H           |    |     |     |        |        |        |      |      |
| HETATM13774 | C1 | PRP | 976 | 18.212 | 57.727 | 9.891  | 1.00 | 0.00 |
| C           |    |     |     |        |        |        |      |      |
| HETATM13775 | H2 | PRP | 976 | 19.037 | 57.252 | 10.421 | 1.00 | 0.00 |
| H           |    |     |     |        |        |        |      |      |

|             |    |     |     |        |        |        |      |      |
|-------------|----|-----|-----|--------|--------|--------|------|------|
| HETATM13776 | H3 | PRP | 976 | 17.320 | 57.109 | 9.998  | 1.00 | 0.00 |
| H           |    |     |     |        |        |        |      |      |
| HETATM13777 | C2 | PRP | 976 | 18.677 | 57.914 | 8.410  | 1.00 | 0.00 |
| C           |    |     |     |        |        |        |      |      |
| HETATM13778 | H4 | PRP | 976 | 19.070 | 56.958 | 8.065  | 1.00 | 0.00 |
| H           |    |     |     |        |        |        |      |      |
| HETATM13779 | O2 | PRP | 976 | 19.719 | 58.795 | 8.119  | 1.00 | 0.00 |
| O           |    |     |     |        |        |        |      |      |
| HETATM13780 | H5 | PRP | 976 | 20.474 | 58.509 | 8.639  | 1.00 | 0.00 |
| H           |    |     |     |        |        |        |      |      |
| HETATM13781 | C3 | PRP | 976 | 17.459 | 58.201 | 7.493  | 1.00 | 0.00 |
| C           |    |     |     |        |        |        |      |      |
| HETATM13782 | H6 | PRP | 976 | 16.923 | 59.097 | 7.807  | 1.00 | 0.00 |
| H           |    |     |     |        |        |        |      |      |
| HETATM13783 | H7 | PRP | 976 | 17.775 | 58.325 | 6.457  | 1.00 | 0.00 |
| H           |    |     |     |        |        |        |      |      |
| HETATM13784 | H8 | PRP | 976 | 16.761 | 57.368 | 7.583  | 1.00 | 0.00 |
| H           |    |     |     |        |        |        |      |      |
| HETATM13785 | O1 | PRP | 977 | 22.713 | 60.737 | 17.316 | 1.00 | 0.00 |
| O           |    |     |     |        |        |        |      |      |
| HETATM13786 | H1 | PRP | 977 | 22.360 | 61.625 | 17.412 | 1.00 | 0.00 |
| H           |    |     |     |        |        |        |      |      |
| HETATM13787 | C1 | PRP | 977 | 22.800 | 60.184 | 18.571 | 1.00 | 0.00 |
| C           |    |     |     |        |        |        |      |      |
| HETATM13788 | H2 | PRP | 977 | 23.104 | 59.138 | 18.600 | 1.00 | 0.00 |
| H           |    |     |     |        |        |        |      |      |
| HETATM13789 | H3 | PRP | 977 | 23.517 | 60.750 | 19.167 | 1.00 | 0.00 |
| H           |    |     |     |        |        |        |      |      |
| HETATM13790 | C2 | PRP | 977 | 21.360 | 60.114 | 19.192 | 1.00 | 0.00 |
| C           |    |     |     |        |        |        |      |      |
| HETATM13791 | H4 | PRP | 977 | 20.634 | 59.822 | 18.434 | 1.00 | 0.00 |
| H           |    |     |     |        |        |        |      |      |
| HETATM13792 | O2 | PRP | 977 | 20.910 | 61.379 | 19.661 | 1.00 | 0.00 |
| O           |    |     |     |        |        |        |      |      |
| HETATM13793 | H5 | PRP | 977 | 21.204 | 62.097 | 19.095 | 1.00 | 0.00 |
| H           |    |     |     |        |        |        |      |      |
| HETATM13794 | C3 | PRP | 977 | 21.367 | 59.164 | 20.372 | 1.00 | 0.00 |
| C           |    |     |     |        |        |        |      |      |
| HETATM13795 | H6 | PRP | 977 | 20.443 | 59.349 | 20.921 | 1.00 | 0.00 |
| H           |    |     |     |        |        |        |      |      |
| HETATM13796 | H7 | PRP | 977 | 21.375 | 58.082 | 20.244 | 1.00 | 0.00 |
| H           |    |     |     |        |        |        |      |      |
| HETATM13797 | H8 | PRP | 977 | 22.211 | 59.411 | 21.016 | 1.00 | 0.00 |
| H           |    |     |     |        |        |        |      |      |
| HETATM13798 | O1 | PRP | 978 | 41.089 | 47.610 | 13.798 | 1.00 | 0.00 |
| O           |    |     |     |        |        |        |      |      |
| HETATM13799 | H1 | PRP | 978 | 41.720 | 47.043 | 13.350 | 1.00 | 0.00 |
| H           |    |     |     |        |        |        |      |      |
| HETATM13800 | C1 | PRP | 978 | 40.900 | 48.594 | 12.760 | 1.00 | 0.00 |
| C           |    |     |     |        |        |        |      |      |
| HETATM13801 | H2 | PRP | 978 | 39.860 | 48.914 | 12.832 | 1.00 | 0.00 |
| H           |    |     |     |        |        |        |      |      |
| HETATM13802 | H3 | PRP | 978 | 41.583 | 49.426 | 12.930 | 1.00 | 0.00 |
| H           |    |     |     |        |        |        |      |      |
| HETATM13803 | C2 | PRP | 978 | 41.345 | 48.054 | 11.390 | 1.00 | 0.00 |
| C           |    |     |     |        |        |        |      |      |



|             |    |     |     |        |        |        |      |      |
|-------------|----|-----|-----|--------|--------|--------|------|------|
| HETATM13804 | H4 | PRP | 978 | 40.674 | 47.248 | 11.093 | 1.00 | 0.00 |
| H           |    |     |     |        |        |        |      |      |
| HETATM13805 | O2 | PRP | 978 | 42.637 | 47.483 | 11.599 | 1.00 | 0.00 |
| O           |    |     |     |        |        |        |      |      |
| HETATM13806 | H5 | PRP | 978 | 43.008 | 47.267 | 10.741 | 1.00 | 0.00 |
| H           |    |     |     |        |        |        |      |      |
| HETATM13807 | C3 | PRP | 978 | 41.312 | 49.079 | 10.257 | 1.00 | 0.00 |
| C           |    |     |     |        |        |        |      |      |
| HETATM13808 | H6 | PRP | 978 | 41.584 | 48.615 | 9.309  | 1.00 | 0.00 |
| H           |    |     |     |        |        |        |      |      |
| HETATM13809 | H7 | PRP | 978 | 40.313 | 49.439 | 10.013 | 1.00 | 0.00 |
| H           |    |     |     |        |        |        |      |      |
| HETATM13810 | H8 | PRP | 978 | 42.063 | 49.850 | 10.429 | 1.00 | 0.00 |
| H           |    |     |     |        |        |        |      |      |
| HETATM13811 | O1 | PRP | 979 | 33.883 | 53.511 | 10.307 | 1.00 | 0.00 |
| O           |    |     |     |        |        |        |      |      |
| HETATM13812 | H1 | PRP | 979 | 34.800 | 53.608 | 10.576 | 1.00 | 0.00 |
| H           |    |     |     |        |        |        |      |      |
| HETATM13813 | C1 | PRP | 979 | 33.536 | 52.145 | 10.409 | 1.00 | 0.00 |
| C           |    |     |     |        |        |        |      |      |
| HETATM13814 | H2 | PRP | 979 | 33.445 | 51.875 | 11.461 | 1.00 | 0.00 |
| H           |    |     |     |        |        |        |      |      |
| HETATM13815 | H3 | PRP | 979 | 32.513 | 52.047 | 10.047 | 1.00 | 0.00 |
| H           |    |     |     |        |        |        |      |      |
| HETATM13816 | C2 | PRP | 979 | 34.466 | 51.186 | 9.642  | 1.00 | 0.00 |
| C           |    |     |     |        |        |        |      |      |
| HETATM13817 | H4 | PRP | 979 | 34.009 | 50.213 | 9.461  | 1.00 | 0.00 |
| H           |    |     |     |        |        |        |      |      |
| HETATM13818 | O2 | PRP | 979 | 35.553 | 50.904 | 10.455 | 1.00 | 0.00 |
| O           |    |     |     |        |        |        |      |      |
| HETATM13819 | H5 | PRP | 979 | 35.964 | 51.675 | 10.853 | 1.00 | 0.00 |
| H           |    |     |     |        |        |        |      |      |
| HETATM13820 | C3 | PRP | 979 | 34.845 | 51.666 | 8.251  | 1.00 | 0.00 |
| C           |    |     |     |        |        |        |      |      |
| HETATM13821 | H6 | PRP | 979 | 33.920 | 51.621 | 7.675  | 1.00 | 0.00 |
| H           |    |     |     |        |        |        |      |      |
| HETATM13822 | H7 | PRP | 979 | 35.293 | 52.660 | 8.245  | 1.00 | 0.00 |
| H           |    |     |     |        |        |        |      |      |
| HETATM13823 | H8 | PRP | 979 | 35.474 | 50.948 | 7.725  | 1.00 | 0.00 |
| H           |    |     |     |        |        |        |      |      |
| HETATM13824 | O1 | PRP | 980 | 20.866 | 39.984 | 9.793  | 1.00 | 0.00 |
| O           |    |     |     |        |        |        |      |      |
| HETATM13825 | H1 | PRP | 980 | 21.184 | 39.153 | 9.434  | 1.00 | 0.00 |
| H           |    |     |     |        |        |        |      |      |
| HETATM13826 | C1 | PRP | 980 | 21.610 | 40.336 | 10.928 | 1.00 | 0.00 |
| C           |    |     |     |        |        |        |      |      |
| HETATM13827 | H2 | PRP | 980 | 21.145 | 39.997 | 11.854 | 1.00 | 0.00 |
| H           |    |     |     |        |        |        |      |      |
| HETATM13828 | H3 | PRP | 980 | 22.624 | 39.954 | 10.813 | 1.00 | 0.00 |
| H           |    |     |     |        |        |        |      |      |
| HETATM13829 | C2 | PRP | 980 | 21.714 | 41.839 | 11.046 | 1.00 | 0.00 |
| C           |    |     |     |        |        |        |      |      |
| HETATM13830 | H4 | PRP | 980 | 20.715 | 42.271 | 11.107 | 1.00 | 0.00 |
| H           |    |     |     |        |        |        |      |      |
| HETATM13831 | O2 | PRP | 980 | 22.465 | 42.338 | 9.915  | 1.00 | 0.00 |
| O           |    |     |     |        |        |        |      |      |

|             |    |     |     |        |        |        |      |      |
|-------------|----|-----|-----|--------|--------|--------|------|------|
| HETATM13832 | H5 | PRP | 980 | 21.962 | 42.298 | 9.099  | 1.00 | 0.00 |
| H           |    |     |     |        |        |        |      |      |
| HETATM13833 | C3 | PRP | 980 | 22.439 | 42.228 | 12.383 | 1.00 | 0.00 |
| C           |    |     |     |        |        |        |      |      |
| HETATM13834 | H6 | PRP | 980 | 22.138 | 41.609 | 13.228 | 1.00 | 0.00 |
| H           |    |     |     |        |        |        |      |      |
| HETATM13835 | H7 | PRP | 980 | 23.515 | 42.205 | 12.211 | 1.00 | 0.00 |
| H           |    |     |     |        |        |        |      |      |
| HETATM13836 | H8 | PRP | 980 | 22.180 | 43.266 | 12.594 | 1.00 | 0.00 |
| H           |    |     |     |        |        |        |      |      |
| HETATM13837 | O1 | PRP | 981 | 37.883 | 45.595 | 4.874  | 1.00 | 0.00 |
| O           |    |     |     |        |        |        |      |      |
| HETATM13838 | H1 | PRP | 981 | 37.401 | 44.943 | 5.387  | 1.00 | 0.00 |
| H           |    |     |     |        |        |        |      |      |
| HETATM13839 | C1 | PRP | 981 | 39.206 | 45.506 | 5.322  | 1.00 | 0.00 |
| C           |    |     |     |        |        |        |      |      |
| HETATM13840 | H2 | PRP | 981 | 39.762 | 46.071 | 4.574  | 1.00 | 0.00 |
| H           |    |     |     |        |        |        |      |      |
| HETATM13841 | H3 | PRP | 981 | 39.171 | 45.978 | 6.304  | 1.00 | 0.00 |
| H           |    |     |     |        |        |        |      |      |
| HETATM13842 | C2 | PRP | 981 | 39.630 | 44.027 | 5.405  | 1.00 | 0.00 |
| C           |    |     |     |        |        |        |      |      |
| HETATM13843 | H4 | PRP | 981 | 40.568 | 44.074 | 5.957  | 1.00 | 0.00 |
| H           |    |     |     |        |        |        |      |      |
| HETATM13844 | O2 | PRP | 981 | 39.777 | 43.619 | 4.099  | 1.00 | 0.00 |
| O           |    |     |     |        |        |        |      |      |
| HETATM13845 | H5 | PRP | 981 | 40.489 | 42.976 | 4.085  | 1.00 | 0.00 |
| H           |    |     |     |        |        |        |      |      |
| HETATM13846 | C3 | PRP | 981 | 38.664 | 43.106 | 6.067  | 1.00 | 0.00 |
| C           |    |     |     |        |        |        |      |      |
| HETATM13847 | H6 | PRP | 981 | 39.042 | 42.087 | 5.983  | 1.00 | 0.00 |
| H           |    |     |     |        |        |        |      |      |
| HETATM13848 | H7 | PRP | 981 | 38.497 | 43.493 | 7.073  | 1.00 | 0.00 |
| H           |    |     |     |        |        |        |      |      |
| HETATM13849 | H8 | PRP | 981 | 37.721 | 43.117 | 5.520  | 1.00 | 0.00 |
| H           |    |     |     |        |        |        |      |      |
| HETATM13850 | O1 | PRP | 982 | 22.756 | 54.824 | 13.273 | 1.00 | 0.00 |
| O           |    |     |     |        |        |        |      |      |
| HETATM13851 | H1 | PRP | 982 | 23.084 | 55.173 | 12.441 | 1.00 | 0.00 |
| H           |    |     |     |        |        |        |      |      |
| HETATM13852 | C1 | PRP | 982 | 21.443 | 54.360 | 12.886 | 1.00 | 0.00 |
| C           |    |     |     |        |        |        |      |      |
| HETATM13853 | H2 | PRP | 982 | 21.533 | 53.274 | 12.877 | 1.00 | 0.00 |
| H           |    |     |     |        |        |        |      |      |
| HETATM13854 | H3 | PRP | 982 | 20.815 | 54.803 | 13.659 | 1.00 | 0.00 |
| H           |    |     |     |        |        |        |      |      |
| HETATM13855 | C2 | PRP | 982 | 21.057 | 54.833 | 11.496 | 1.00 | 0.00 |
| C           |    |     |     |        |        |        |      |      |
| HETATM13856 | H4 | PRP | 982 | 21.698 | 54.422 | 10.716 | 1.00 | 0.00 |
| H           |    |     |     |        |        |        |      |      |
| HETATM13857 | O2 | PRP | 982 | 21.122 | 56.206 | 11.553 | 1.00 | 0.00 |
| O           |    |     |     |        |        |        |      |      |
| HETATM13858 | H5 | PRP | 982 | 20.622 | 56.492 | 12.321 | 1.00 | 0.00 |
| H           |    |     |     |        |        |        |      |      |
| HETATM13859 | C3 | PRP | 982 | 19.593 | 54.449 | 11.331 | 1.00 | 0.00 |
| C           |    |     |     |        |        |        |      |      |

|             |    |     |     |        |        |        |      |      |
|-------------|----|-----|-----|--------|--------|--------|------|------|
| HETATM13860 | H6 | PRP | 982 | 19.049 | 55.046 | 10.598 | 1.00 | 0.00 |
| H           |    |     |     |        |        |        |      |      |
| HETATM13861 | H7 | PRP | 982 | 19.582 | 53.441 | 10.916 | 1.00 | 0.00 |
| H           |    |     |     |        |        |        |      |      |
| HETATM13862 | H8 | PRP | 982 | 18.999 | 54.478 | 12.244 | 1.00 | 0.00 |
| H           |    |     |     |        |        |        |      |      |
| HETATM13863 | O1 | PRP | 983 | 19.321 | 45.094 | 4.946  | 1.00 | 0.00 |
| O           |    |     |     |        |        |        |      |      |
| HETATM13864 | H1 | PRP | 983 | 19.842 | 45.900 | 4.973  | 1.00 | 0.00 |
| H           |    |     |     |        |        |        |      |      |
| HETATM13865 | C1 | PRP | 983 | 19.638 | 44.574 | 3.664  | 1.00 | 0.00 |
| C           |    |     |     |        |        |        |      |      |
| HETATM13866 | H2 | PRP | 983 | 20.459 | 43.890 | 3.876  | 1.00 | 0.00 |
| H           |    |     |     |        |        |        |      |      |
| HETATM13867 | H3 | PRP | 983 | 18.821 | 44.036 | 3.184  | 1.00 | 0.00 |
| H           |    |     |     |        |        |        |      |      |
| HETATM13868 | C2 | PRP | 983 | 19.982 | 45.829 | 2.840  | 1.00 | 0.00 |
| C           |    |     |     |        |        |        |      |      |
| HETATM13869 | H4 | PRP | 983 | 20.006 | 45.476 | 1.809  | 1.00 | 0.00 |
| H           |    |     |     |        |        |        |      |      |
| HETATM13870 | O2 | PRP | 983 | 21.332 | 46.245 | 3.083  | 1.00 | 0.00 |
| O           |    |     |     |        |        |        |      |      |
| HETATM13871 | H5 | PRP | 983 | 21.815 | 45.434 | 2.908  | 1.00 | 0.00 |
| H           |    |     |     |        |        |        |      |      |
| HETATM13872 | C3 | PRP | 983 | 19.098 | 46.989 | 2.826  | 1.00 | 0.00 |
| C           |    |     |     |        |        |        |      |      |
| HETATM13873 | H6 | PRP | 983 | 18.771 | 47.239 | 3.836  | 1.00 | 0.00 |
| H           |    |     |     |        |        |        |      |      |
| HETATM13874 | H7 | PRP | 983 | 19.670 | 47.865 | 2.519  | 1.00 | 0.00 |
| H           |    |     |     |        |        |        |      |      |
| HETATM13875 | H8 | PRP | 983 | 18.216 | 46.948 | 2.188  | 1.00 | 0.00 |
| H           |    |     |     |        |        |        |      |      |
| HETATM13876 | O1 | PRP | 984 | 27.877 | 41.885 | 2.372  | 1.00 | 0.00 |
| O           |    |     |     |        |        |        |      |      |
| HETATM13877 | H1 | PRP | 984 | 28.648 | 41.627 | 1.861  | 1.00 | 0.00 |
| H           |    |     |     |        |        |        |      |      |
| HETATM13878 | C1 | PRP | 984 | 27.236 | 40.644 | 2.718  | 1.00 | 0.00 |
| C           |    |     |     |        |        |        |      |      |
| HETATM13879 | H2 | PRP | 984 | 26.185 | 40.764 | 2.979  | 1.00 | 0.00 |
| H           |    |     |     |        |        |        |      |      |
| HETATM13880 | H3 | PRP | 984 | 27.178 | 39.939 | 1.889  | 1.00 | 0.00 |
| H           |    |     |     |        |        |        |      |      |
| HETATM13881 | C2 | PRP | 984 | 28.037 | 39.982 | 3.817  | 1.00 | 0.00 |
| C           |    |     |     |        |        |        |      |      |
| HETATM13882 | H4 | PRP | 984 | 28.275 | 40.788 | 4.511  | 1.00 | 0.00 |
| H           |    |     |     |        |        |        |      |      |
| HETATM13883 | O2 | PRP | 984 | 29.194 | 39.350 | 3.443  | 1.00 | 0.00 |
| O           |    |     |     |        |        |        |      |      |
| HETATM13884 | H5 | PRP | 984 | 29.650 | 39.070 | 4.241  | 1.00 | 0.00 |
| H           |    |     |     |        |        |        |      |      |
| HETATM13885 | C3 | PRP | 984 | 27.157 | 38.909 | 4.483  | 1.00 | 0.00 |
| C           |    |     |     |        |        |        |      |      |
| HETATM13886 | H6 | PRP | 984 | 27.429 | 38.667 | 5.511  | 1.00 | 0.00 |
| H           |    |     |     |        |        |        |      |      |
| HETATM13887 | H7 | PRP | 984 | 26.103 | 39.176 | 4.548  | 1.00 | 0.00 |
| H           |    |     |     |        |        |        |      |      |

|             |    |     |     |        |        |        |      |      |
|-------------|----|-----|-----|--------|--------|--------|------|------|
| HETATM13888 | H8 | PRP | 984 | 27.216 | 38.048 | 3.818  | 1.00 | 0.00 |
| H           |    |     |     |        |        |        |      |      |
| HETATM13889 | O1 | PRP | 985 | 28.727 | 43.631 | 13.374 | 1.00 | 0.00 |
| O           |    |     |     |        |        |        |      |      |
| HETATM13890 | H1 | PRP | 985 | 28.125 | 43.708 | 12.629 | 1.00 | 0.00 |
| H           |    |     |     |        |        |        |      |      |
| HETATM13891 | C1 | PRP | 985 | 28.175 | 42.568 | 14.131 | 1.00 | 0.00 |
| C           |    |     |     |        |        |        |      |      |
| HETATM13892 | H2 | PRP | 985 | 27.994 | 41.738 | 13.448 | 1.00 | 0.00 |
| H           |    |     |     |        |        |        |      |      |
| HETATM13893 | H3 | PRP | 985 | 28.925 | 42.244 | 14.851 | 1.00 | 0.00 |
| H           |    |     |     |        |        |        |      |      |
| HETATM13894 | C2 | PRP | 985 | 26.865 | 43.031 | 14.735 | 1.00 | 0.00 |
| C           |    |     |     |        |        |        |      |      |
| HETATM13895 | H4 | PRP | 985 | 26.624 | 42.247 | 15.453 | 1.00 | 0.00 |
| H           |    |     |     |        |        |        |      |      |
| HETATM13896 | O2 | PRP | 985 | 25.886 | 43.000 | 13.674 | 1.00 | 0.00 |
| O           |    |     |     |        |        |        |      |      |
| HETATM13897 | H5 | PRP | 985 | 25.024 | 42.824 | 14.058 | 1.00 | 0.00 |
| H           |    |     |     |        |        |        |      |      |
| HETATM13898 | C3 | PRP | 985 | 26.851 | 44.405 | 15.357 | 1.00 | 0.00 |
| C           |    |     |     |        |        |        |      |      |
| HETATM13899 | H6 | PRP | 985 | 25.893 | 44.494 | 15.869 | 1.00 | 0.00 |
| H           |    |     |     |        |        |        |      |      |
| HETATM13900 | H7 | PRP | 985 | 27.658 | 44.579 | 16.068 | 1.00 | 0.00 |
| H           |    |     |     |        |        |        |      |      |
| HETATM13901 | H8 | PRP | 985 | 26.933 | 45.262 | 14.688 | 1.00 | 0.00 |
| H           |    |     |     |        |        |        |      |      |
| HETATM13902 | O1 | PRP | 986 | 22.933 | 43.585 | 3.173  | 1.00 | 0.00 |
| O           |    |     |     |        |        |        |      |      |
| HETATM13903 | H1 | PRP | 986 | 23.739 | 43.922 | 2.774  | 1.00 | 0.00 |
| H           |    |     |     |        |        |        |      |      |
| HETATM13904 | C1 | PRP | 986 | 23.190 | 43.479 | 4.560  | 1.00 | 0.00 |
| C           |    |     |     |        |        |        |      |      |
| HETATM13905 | H2 | PRP | 986 | 23.945 | 44.202 | 4.869  | 1.00 | 0.00 |
| H           |    |     |     |        |        |        |      |      |
| HETATM13906 | H3 | PRP | 986 | 22.295 | 43.764 | 5.114  | 1.00 | 0.00 |
| H           |    |     |     |        |        |        |      |      |
| HETATM13907 | C2 | PRP | 986 | 23.674 | 42.061 | 4.805  | 1.00 | 0.00 |
| C           |    |     |     |        |        |        |      |      |
| HETATM13908 | H4 | PRP | 986 | 24.654 | 42.028 | 4.330  | 1.00 | 0.00 |
| H           |    |     |     |        |        |        |      |      |
| HETATM13909 | O2 | PRP | 986 | 22.793 | 41.132 | 4.243  | 1.00 | 0.00 |
| O           |    |     |     |        |        |        |      |      |
| HETATM13910 | H5 | PRP | 986 | 21.896 | 41.450 | 4.365  | 1.00 | 0.00 |
| H           |    |     |     |        |        |        |      |      |
| HETATM13911 | C3 | PRP | 986 | 23.841 | 41.732 | 6.312  | 1.00 | 0.00 |
| C           |    |     |     |        |        |        |      |      |
| HETATM13912 | H6 | PRP | 986 | 24.301 | 42.522 | 6.907  | 1.00 | 0.00 |
| H           |    |     |     |        |        |        |      |      |
| HETATM13913 | H7 | PRP | 986 | 22.862 | 41.428 | 6.680  | 1.00 | 0.00 |
| H           |    |     |     |        |        |        |      |      |
| HETATM13914 | H8 | PRP | 986 | 24.513 | 40.884 | 6.446  | 1.00 | 0.00 |
| H           |    |     |     |        |        |        |      |      |
| HETATM13915 | O1 | PRP | 987 | 41.208 | 52.772 | 7.258  | 1.00 | 0.00 |
| O           |    |     |     |        |        |        |      |      |

|             |    |     |     |        |        |       |      |      |
|-------------|----|-----|-----|--------|--------|-------|------|------|
| HETATM13916 | H1 | PRP | 987 | 40.298 | 52.950 | 7.007 | 1.00 | 0.00 |
| H           |    |     |     |        |        |       |      |      |
| HETATM13917 | C1 | PRP | 987 | 41.889 | 52.159 | 6.143 | 1.00 | 0.00 |
| C           |    |     |     |        |        |       |      |      |
| HETATM13918 | H2 | PRP | 987 | 42.835 | 51.795 | 6.545 | 1.00 | 0.00 |
| H           |    |     |     |        |        |       |      |      |
| HETATM13919 | H3 | PRP | 987 | 41.389 | 51.277 | 5.744 | 1.00 | 0.00 |
| H           |    |     |     |        |        |       |      |      |
| HETATM13920 | C2 | PRP | 987 | 42.238 | 53.083 | 4.956 | 1.00 | 0.00 |
| C           |    |     |     |        |        |       |      |      |
| HETATM13921 | H4 | PRP | 987 | 42.392 | 54.073 | 5.384 | 1.00 | 0.00 |
| H           |    |     |     |        |        |       |      |      |
| HETATM13922 | O2 | PRP | 987 | 41.131 | 53.113 | 4.190 | 1.00 | 0.00 |
| O           |    |     |     |        |        |       |      |      |
| HETATM13923 | H5 | PRP | 987 | 41.276 | 53.738 | 3.476 | 1.00 | 0.00 |
| H           |    |     |     |        |        |       |      |      |
| HETATM13924 | C3 | PRP | 987 | 43.479 | 52.746 | 4.079 | 1.00 | 0.00 |
| C           |    |     |     |        |        |       |      |      |
| HETATM13925 | H6 | PRP | 987 | 43.326 | 53.380 | 3.206 | 1.00 | 0.00 |
| H           |    |     |     |        |        |       |      |      |
| HETATM13926 | H7 | PRP | 987 | 44.360 | 53.184 | 4.549 | 1.00 | 0.00 |
| H           |    |     |     |        |        |       |      |      |
| HETATM13927 | H8 | PRP | 987 | 43.538 | 51.717 | 3.723 | 1.00 | 0.00 |
| H           |    |     |     |        |        |       |      |      |
| HETATM13928 | O1 | PRP | 988 | -1.040 | 1.255  | 4.473 | 1.00 | 0.00 |
| O           |    |     |     |        |        |       |      |      |
| HETATM13929 | H1 | PRP | 988 | -1.480 | 1.943  | 3.968 | 1.00 | 0.00 |
| H           |    |     |     |        |        |       |      |      |
| HETATM13930 | C1 | PRP | 988 | -0.445 | 1.897  | 5.597 | 1.00 | 0.00 |
| C           |    |     |     |        |        |       |      |      |
| HETATM13931 | H2 | PRP | 988 | -0.805 | 2.920  | 5.487 | 1.00 | 0.00 |
| H           |    |     |     |        |        |       |      |      |
| HETATM13932 | H3 | PRP | 988 | -0.869 | 1.442  | 6.493 | 1.00 | 0.00 |
| H           |    |     |     |        |        |       |      |      |
| HETATM13933 | C2 | PRP | 988 | 1.039  | 1.823  | 5.636 | 1.00 | 0.00 |
| C           |    |     |     |        |        |       |      |      |
| HETATM13934 | H4 | PRP | 988 | 1.391  | 1.957  | 4.613 | 1.00 | 0.00 |
| H           |    |     |     |        |        |       |      |      |
| HETATM13935 | O2 | PRP | 988 | 1.431  | 0.603  | 6.287 | 1.00 | 0.00 |
| O           |    |     |     |        |        |       |      |      |
| HETATM13936 | H5 | PRP | 988 | 1.048  | -0.172 | 5.870 | 1.00 | 0.00 |
| H           |    |     |     |        |        |       |      |      |
| HETATM13937 | C3 | PRP | 988 | 1.431  | 2.997  | 6.516 | 1.00 | 0.00 |
| C           |    |     |     |        |        |       |      |      |
| HETATM13938 | H6 | PRP | 988 | 2.462  | 2.857  | 6.839 | 1.00 | 0.00 |
| H           |    |     |     |        |        |       |      |      |
| HETATM13939 | H7 | PRP | 988 | 1.306  | 3.919  | 5.949 | 1.00 | 0.00 |
| H           |    |     |     |        |        |       |      |      |
| HETATM13940 | H8 | PRP | 988 | 0.901  | 2.862  | 7.459 | 1.00 | 0.00 |
| H           |    |     |     |        |        |       |      |      |
| HETATM13941 | O1 | PRP | 989 | 2.956  | 6.386  | 7.989 | 1.00 | 0.00 |
| O           |    |     |     |        |        |       |      |      |
| HETATM13942 | H1 | PRP | 989 | 3.566  | 6.521  | 8.717 | 1.00 | 0.00 |
| H           |    |     |     |        |        |       |      |      |
| HETATM13943 | C1 | PRP | 989 | 1.744  | 7.010  | 8.091 | 1.00 | 0.00 |
| C           |    |     |     |        |        |       |      |      |

|             |    |     |     |        |        |        |      |      |
|-------------|----|-----|-----|--------|--------|--------|------|------|
| HETATM13944 | H2 | PRP | 989 | 1.897  | 8.038  | 8.420  | 1.00 | 0.00 |
| H           |    |     |     |        |        |        |      |      |
| HETATM13945 | H3 | PRP | 989 | 1.307  | 7.028  | 7.093  | 1.00 | 0.00 |
| H           |    |     |     |        |        |        |      |      |
| HETATM13946 | C2 | PRP | 989 | 0.886  | 6.363  | 9.167  | 1.00 | 0.00 |
| C           |    |     |     |        |        |        |      |      |
| HETATM13947 | H4 | PRP | 989 | 1.498  | 6.494  | 10.059 | 1.00 | 0.00 |
| H           |    |     |     |        |        |        |      |      |
| HETATM13948 | O2 | PRP | 989 | 0.589  | 5.015  | 8.947  | 1.00 | 0.00 |
| O           |    |     |     |        |        |        |      |      |
| HETATM13949 | H5 | PRP | 989 | 1.395  | 4.611  | 8.619  | 1.00 | 0.00 |
| H           |    |     |     |        |        |        |      |      |
| HETATM13950 | C3 | PRP | 989 | -0.369 | 7.060  | 9.253  | 1.00 | 0.00 |
| C           |    |     |     |        |        |        |      |      |
| HETATM13951 | H6 | PRP | 989 | -0.791 | 6.649  | 10.171 | 1.00 | 0.00 |
| H           |    |     |     |        |        |        |      |      |
| HETATM13952 | H7 | PRP | 989 | -0.214 | 8.138  | 9.287  | 1.00 | 0.00 |
| H           |    |     |     |        |        |        |      |      |
| HETATM13953 | H8 | PRP | 989 | -0.961 | 6.965  | 8.343  | 1.00 | 0.00 |
| H           |    |     |     |        |        |        |      |      |
| HETATM13954 | O1 | PRP | 990 | 20.050 | 0.572  | 25.525 | 1.00 | 0.00 |
| O           |    |     |     |        |        |        |      |      |
| HETATM13955 | H1 | PRP | 990 | 19.618 | 1.097  | 26.202 | 1.00 | 0.00 |
| H           |    |     |     |        |        |        |      |      |
| HETATM13956 | C1 | PRP | 990 | 20.199 | 1.377  | 24.344 | 1.00 | 0.00 |
| C           |    |     |     |        |        |        |      |      |
| HETATM13957 | H2 | PRP | 990 | 19.781 | 2.361  | 24.555 | 1.00 | 0.00 |
| H           |    |     |     |        |        |        |      |      |
| HETATM13958 | H3 | PRP | 990 | 21.271 | 1.422  | 24.149 | 1.00 | 0.00 |
| H           |    |     |     |        |        |        |      |      |
| HETATM13959 | C2 | PRP | 990 | 19.393 | 0.793  | 23.224 | 1.00 | 0.00 |
| C           |    |     |     |        |        |        |      |      |
| HETATM13960 | H4 | PRP | 990 | 19.481 | 1.499  | 22.398 | 1.00 | 0.00 |
| H           |    |     |     |        |        |        |      |      |
| HETATM13961 | O2 | PRP | 990 | 18.014 | 0.756  | 23.690 | 1.00 | 0.00 |
| O           |    |     |     |        |        |        |      |      |
| HETATM13962 | H5 | PRP | 990 | 17.906 | 0.241  | 24.493 | 1.00 | 0.00 |
| H           |    |     |     |        |        |        |      |      |
| HETATM13963 | C3 | PRP | 990 | 19.763 | -0.629 | 22.788 | 1.00 | 0.00 |
| C           |    |     |     |        |        |        |      |      |
| HETATM13964 | H6 | PRP | 990 | 19.335 | -0.761 | 21.794 | 1.00 | 0.00 |
| H           |    |     |     |        |        |        |      |      |
| HETATM13965 | H7 | PRP | 990 | 20.848 | -0.618 | 22.689 | 1.00 | 0.00 |
| H           |    |     |     |        |        |        |      |      |
| HETATM13966 | H8 | PRP | 990 | 19.426 | -1.418 | 23.461 | 1.00 | 0.00 |
| H           |    |     |     |        |        |        |      |      |
| HETATM13967 | O1 | PRP | 991 | 4.384  | 4.890  | 3.200  | 1.00 | 0.00 |
| O           |    |     |     |        |        |        |      |      |
| HETATM13968 | H1 | PRP | 991 | 3.888  | 5.650  | 3.512  | 1.00 | 0.00 |
| H           |    |     |     |        |        |        |      |      |
| HETATM13969 | C1 | PRP | 991 | 5.654  | 4.974  | 3.930  | 1.00 | 0.00 |
| C           |    |     |     |        |        |        |      |      |
| HETATM13970 | H2 | PRP | 991 | 6.278  | 4.131  | 3.633  | 1.00 | 0.00 |
| H           |    |     |     |        |        |        |      |      |
| HETATM13971 | H3 | PRP | 991 | 6.180  | 5.911  | 3.746  | 1.00 | 0.00 |
| H           |    |     |     |        |        |        |      |      |

|             |    |     |     |        |        |        |      |      |
|-------------|----|-----|-----|--------|--------|--------|------|------|
| HETATM13972 | C2 | PRP | 991 | 5.274  | 4.768  | 5.413  | 1.00 | 0.00 |
| C           |    |     |     |        |        |        |      |      |
| HETATM13973 | H4 | PRP | 991 | 4.450  | 4.056  | 5.442  | 1.00 | 0.00 |
| H           |    |     |     |        |        |        |      |      |
| HETATM13974 | O2 | PRP | 991 | 4.782  | 5.976  | 5.979  | 1.00 | 0.00 |
| O           |    |     |     |        |        |        |      |      |
| HETATM13975 | H5 | PRP | 991 | 4.027  | 5.785  | 6.541  | 1.00 | 0.00 |
| H           |    |     |     |        |        |        |      |      |
| HETATM13976 | C3 | PRP | 991 | 6.474  | 4.438  | 6.293  | 1.00 | 0.00 |
| C           |    |     |     |        |        |        |      |      |
| HETATM13977 | H6 | PRP | 991 | 6.152  | 4.308  | 7.327  | 1.00 | 0.00 |
| H           |    |     |     |        |        |        |      |      |
| HETATM13978 | H7 | PRP | 991 | 6.979  | 3.529  | 5.967  | 1.00 | 0.00 |
| H           |    |     |     |        |        |        |      |      |
| HETATM13979 | H8 | PRP | 991 | 7.152  | 5.291  | 6.300  | 1.00 | 0.00 |
| H           |    |     |     |        |        |        |      |      |
| HETATM13980 | O1 | PRP | 992 | 11.418 | 26.571 | 6.699  | 1.00 | 0.00 |
| O           |    |     |     |        |        |        |      |      |
| HETATM13981 | H1 | PRP | 992 | 11.904 | 25.748 | 6.784  | 1.00 | 0.00 |
| H           |    |     |     |        |        |        |      |      |
| HETATM13982 | C1 | PRP | 992 | 12.040 | 27.458 | 7.616  | 1.00 | 0.00 |
| C           |    |     |     |        |        |        |      |      |
| HETATM13983 | H2 | PRP | 992 | 12.925 | 27.880 | 7.140  | 1.00 | 0.00 |
| H           |    |     |     |        |        |        |      |      |
| HETATM13984 | H3 | PRP | 992 | 11.394 | 28.276 | 7.935  | 1.00 | 0.00 |
| H           |    |     |     |        |        |        |      |      |
| HETATM13985 | C2 | PRP | 992 | 12.585 | 26.664 | 8.786  | 1.00 | 0.00 |
| C           |    |     |     |        |        |        |      |      |
| HETATM13986 | H4 | PRP | 992 | 13.190 | 27.331 | 9.400  | 1.00 | 0.00 |
| H           |    |     |     |        |        |        |      |      |
| HETATM13987 | O2 | PRP | 992 | 13.349 | 25.590 | 8.352  | 1.00 | 0.00 |
| O           |    |     |     |        |        |        |      |      |
| HETATM13988 | H5 | PRP | 992 | 14.051 | 25.898 | 7.774  | 1.00 | 0.00 |
| H           |    |     |     |        |        |        |      |      |
| HETATM13989 | C3 | PRP | 992 | 11.534 | 25.995 | 9.673  | 1.00 | 0.00 |
| C           |    |     |     |        |        |        |      |      |
| HETATM13990 | H6 | PRP | 992 | 11.921 | 25.453 | 10.536 | 1.00 | 0.00 |
| H           |    |     |     |        |        |        |      |      |
| HETATM13991 | H7 | PRP | 992 | 10.852 | 26.803 | 9.935  | 1.00 | 0.00 |
| H           |    |     |     |        |        |        |      |      |
| HETATM13992 | H8 | PRP | 992 | 11.075 | 25.239 | 9.035  | 1.00 | 0.00 |
| H           |    |     |     |        |        |        |      |      |
| HETATM13993 | O1 | PRP | 993 | 18.794 | 26.227 | -1.137 | 1.00 | 0.00 |
| O           |    |     |     |        |        |        |      |      |
| HETATM13994 | H1 | PRP | 993 | 18.630 | 27.162 | -1.281 | 1.00 | 0.00 |
| H           |    |     |     |        |        |        |      |      |
| HETATM13995 | C1 | PRP | 993 | 18.315 | 25.839 | 0.095  | 1.00 | 0.00 |
| C           |    |     |     |        |        |        |      |      |
| HETATM13996 | H2 | PRP | 993 | 18.889 | 24.977 | 0.436  | 1.00 | 0.00 |
| H           |    |     |     |        |        |        |      |      |
| HETATM13997 | H3 | PRP | 993 | 18.320 | 26.682 | 0.785  | 1.00 | 0.00 |
| H           |    |     |     |        |        |        |      |      |
| HETATM13998 | C2 | PRP | 993 | 16.860 | 25.358 | 0.064  | 1.00 | 0.00 |
| C           |    |     |     |        |        |        |      |      |
| HETATM13999 | H4 | PRP | 993 | 16.924 | 24.630 | -0.745 | 1.00 | 0.00 |
| H           |    |     |     |        |        |        |      |      |

|             |    |     |     |        |        |        |      |      |
|-------------|----|-----|-----|--------|--------|--------|------|------|
| HETATM14000 | O2 | PRP | 993 | 15.836 | 26.299 | -0.360 | 1.00 | 0.00 |
| O           |    |     |     |        |        |        |      |      |
| HETATM14001 | H5 | PRP | 993 | 16.153 | 26.784 | -1.125 | 1.00 | 0.00 |
| H           |    |     |     |        |        |        |      |      |
| HETATM14002 | C3 | PRP | 993 | 16.383 | 24.529 | 1.245  | 1.00 | 0.00 |
| C           |    |     |     |        |        |        |      |      |
| HETATM14003 | H6 | PRP | 993 | 16.601 | 24.789 | 2.281  | 1.00 | 0.00 |
| H           |    |     |     |        |        |        |      |      |
| HETATM14004 | H7 | PRP | 993 | 15.305 | 24.412 | 1.133  | 1.00 | 0.00 |
| H           |    |     |     |        |        |        |      |      |
| HETATM14005 | H8 | PRP | 993 | 16.773 | 23.523 | 1.090  | 1.00 | 0.00 |
| H           |    |     |     |        |        |        |      |      |
| HETATM14006 | O1 | PRP | 994 | 26.823 | 44.414 | 9.448  | 1.00 | 0.00 |
| O           |    |     |     |        |        |        |      |      |
| HETATM14007 | H1 | PRP | 994 | 27.405 | 44.397 | 10.211 | 1.00 | 0.00 |
| H           |    |     |     |        |        |        |      |      |
| HETATM14008 | C1 | PRP | 994 | 25.870 | 43.421 | 9.527  | 1.00 | 0.00 |
| C           |    |     |     |        |        |        |      |      |
| HETATM14009 | H2 | PRP | 994 | 25.119 | 43.735 | 10.253 | 1.00 | 0.00 |
| H           |    |     |     |        |        |        |      |      |
| HETATM14010 | H3 | PRP | 994 | 25.213 | 43.368 | 8.659  | 1.00 | 0.00 |
| H           |    |     |     |        |        |        |      |      |
| HETATM14011 | C2 | PRP | 994 | 26.428 | 42.021 | 9.913  | 1.00 | 0.00 |
| C           |    |     |     |        |        |        |      |      |
| HETATM14012 | H4 | PRP | 994 | 25.593 | 41.348 | 10.108 | 1.00 | 0.00 |
| H           |    |     |     |        |        |        |      |      |
| HETATM14013 | O2 | PRP | 994 | 27.158 | 42.068 | 11.131 | 1.00 | 0.00 |
| O           |    |     |     |        |        |        |      |      |
| HETATM14014 | H5 | PRP | 994 | 26.588 | 42.187 | 11.894 | 1.00 | 0.00 |
| H           |    |     |     |        |        |        |      |      |
| HETATM14015 | C3 | PRP | 994 | 27.345 | 41.593 | 8.773  | 1.00 | 0.00 |
| C           |    |     |     |        |        |        |      |      |
| HETATM14016 | H6 | PRP | 994 | 27.955 | 40.716 | 8.988  | 1.00 | 0.00 |
| H           |    |     |     |        |        |        |      |      |
| HETATM14017 | H7 | PRP | 994 | 26.725 | 41.289 | 7.929  | 1.00 | 0.00 |
| H           |    |     |     |        |        |        |      |      |
| HETATM14018 | H8 | PRP | 994 | 28.057 | 42.397 | 8.588  | 1.00 | 0.00 |
| H           |    |     |     |        |        |        |      |      |
| HETATM14019 | O1 | PRP | 995 | 18.261 | 10.899 | 3.668  | 1.00 | 0.00 |
| O           |    |     |     |        |        |        |      |      |
| HETATM14020 | H1 | PRP | 995 | 19.042 | 11.122 | 4.180  | 1.00 | 0.00 |
| H           |    |     |     |        |        |        |      |      |
| HETATM14021 | C1 | PRP | 995 | 18.503 | 9.756  | 2.905  | 1.00 | 0.00 |
| C           |    |     |     |        |        |        |      |      |
| HETATM14022 | H2 | PRP | 995 | 18.713 | 8.896  | 3.542  | 1.00 | 0.00 |
| H           |    |     |     |        |        |        |      |      |
| HETATM14023 | H3 | PRP | 995 | 17.582 | 9.561  | 2.355  | 1.00 | 0.00 |
| H           |    |     |     |        |        |        |      |      |
| HETATM14024 | C2 | PRP | 995 | 19.770 | 10.110 | 2.143  | 1.00 | 0.00 |
| C           |    |     |     |        |        |        |      |      |
| HETATM14025 | H4 | PRP | 995 | 20.517 | 10.434 | 2.868  | 1.00 | 0.00 |
| H           |    |     |     |        |        |        |      |      |
| HETATM14026 | O2 | PRP | 995 | 19.512 | 11.173 | 1.254  | 1.00 | 0.00 |
| O           |    |     |     |        |        |        |      |      |
| HETATM14027 | H5 | PRP | 995 | 19.183 | 11.911 | 1.772  | 1.00 | 0.00 |
| H           |    |     |     |        |        |        |      |      |



|             |    |     |     |        |        |        |      |      |
|-------------|----|-----|-----|--------|--------|--------|------|------|
| HETATM14028 | C3 | PRP | 995 | 20.278 | 8.879  | 1.436  | 1.00 | 0.00 |
| C           |    |     |     |        |        |        |      |      |
| HETATM14029 | H6 | PRP | 995 | 19.460 | 8.426  | 0.875  | 1.00 | 0.00 |
| H           |    |     |     |        |        |        |      |      |
| HETATM14030 | H7 | PRP | 995 | 20.992 | 9.135  | 0.654  | 1.00 | 0.00 |
| H           |    |     |     |        |        |        |      |      |
| HETATM14031 | H8 | PRP | 995 | 20.647 | 8.164  | 2.172  | 1.00 | 0.00 |
| H           |    |     |     |        |        |        |      |      |
| HETATM14032 | O1 | PRP | 996 | 24.141 | 23.938 | 4.319  | 1.00 | 0.00 |
| O           |    |     |     |        |        |        |      |      |
| HETATM14033 | H1 | PRP | 996 | 24.484 | 23.502 | 3.535  | 1.00 | 0.00 |
| H           |    |     |     |        |        |        |      |      |
| HETATM14034 | C1 | PRP | 996 | 24.445 | 25.278 | 4.178  | 1.00 | 0.00 |
| C           |    |     |     |        |        |        |      |      |
| HETATM14035 | H2 | PRP | 996 | 23.821 | 25.652 | 3.365  | 1.00 | 0.00 |
| H           |    |     |     |        |        |        |      |      |
| HETATM14036 | H3 | PRP | 996 | 24.151 | 25.710 | 5.135  | 1.00 | 0.00 |
| H           |    |     |     |        |        |        |      |      |
| HETATM14037 | C2 | PRP | 996 | 25.955 | 25.567 | 3.758  | 1.00 | 0.00 |
| C           |    |     |     |        |        |        |      |      |
| HETATM14038 | H4 | PRP | 996 | 26.106 | 26.646 | 3.781  | 1.00 | 0.00 |
| H           |    |     |     |        |        |        |      |      |
| HETATM14039 | O2 | PRP | 996 | 26.087 | 24.941 | 2.474  | 1.00 | 0.00 |
| O           |    |     |     |        |        |        |      |      |
| HETATM14040 | H5 | PRP | 996 | 25.620 | 25.466 | 1.820  | 1.00 | 0.00 |
| H           |    |     |     |        |        |        |      |      |
| HETATM14041 | C3 | PRP | 996 | 26.956 | 24.879 | 4.700  | 1.00 | 0.00 |
| C           |    |     |     |        |        |        |      |      |
| HETATM14042 | H6 | PRP | 996 | 26.552 | 23.916 | 5.015  | 1.00 | 0.00 |
| H           |    |     |     |        |        |        |      |      |
| HETATM14043 | H7 | PRP | 996 | 27.969 | 24.856 | 4.299  | 1.00 | 0.00 |
| H           |    |     |     |        |        |        |      |      |
| HETATM14044 | H8 | PRP | 996 | 26.911 | 25.412 | 5.650  | 1.00 | 0.00 |
| H           |    |     |     |        |        |        |      |      |
| HETATM14045 | O1 | PRP | 997 | 22.303 | 9.200  | -7.564 | 1.00 | 0.00 |
| O           |    |     |     |        |        |        |      |      |
| HETATM14046 | H1 | PRP | 997 | 22.157 | 8.333  | -7.949 | 1.00 | 0.00 |
| H           |    |     |     |        |        |        |      |      |
| HETATM14047 | C1 | PRP | 997 | 21.207 | 9.572  | -6.709 | 1.00 | 0.00 |
| C           |    |     |     |        |        |        |      |      |
| HETATM14048 | H2 | PRP | 997 | 20.267 | 9.383  | -7.227 | 1.00 | 0.00 |
| H           |    |     |     |        |        |        |      |      |
| HETATM14049 | H3 | PRP | 997 | 21.160 | 9.034  | -5.762 | 1.00 | 0.00 |
| H           |    |     |     |        |        |        |      |      |
| HETATM14050 | C2 | PRP | 997 | 21.455 | 11.063 | -6.386 | 1.00 | 0.00 |
| C           |    |     |     |        |        |        |      |      |
| HETATM14051 | H4 | PRP | 997 | 21.851 | 11.470 | -7.316 | 1.00 | 0.00 |
| H           |    |     |     |        |        |        |      |      |
| HETATM14052 | O2 | PRP | 997 | 22.379 | 11.278 | -5.331 | 1.00 | 0.00 |
| O           |    |     |     |        |        |        |      |      |
| HETATM14053 | H5 | PRP | 997 | 21.998 | 11.239 | -4.450 | 1.00 | 0.00 |
| H           |    |     |     |        |        |        |      |      |
| HETATM14054 | C3 | PRP | 997 | 20.072 | 11.716 | -6.137 | 1.00 | 0.00 |
| C           |    |     |     |        |        |        |      |      |
| HETATM14055 | H6 | PRP | 997 | 20.288 | 12.775 | -6.001 | 1.00 | 0.00 |
| H           |    |     |     |        |        |        |      |      |

|             |    |     |     |        |        |        |      |      |
|-------------|----|-----|-----|--------|--------|--------|------|------|
| HETATM14056 | H7 | PRP | 997 | 19.452 | 11.584 | -7.024 | 1.00 | 0.00 |
| H           |    |     |     |        |        |        |      |      |
| HETATM14057 | H8 | PRP | 997 | 19.641 | 11.218 | -5.269 | 1.00 | 0.00 |
| H           |    |     |     |        |        |        |      |      |
| HETATM14058 | O1 | PRP | 998 | 18.896 | 21.788 | 0.149  | 1.00 | 0.00 |
| O           |    |     |     |        |        |        |      |      |
| HETATM14059 | H1 | PRP | 998 | 19.221 | 21.972 | -0.735 | 1.00 | 0.00 |
| H           |    |     |     |        |        |        |      |      |
| HETATM14060 | C1 | PRP | 998 | 19.990 | 21.796 | 1.087  | 1.00 | 0.00 |
| C           |    |     |     |        |        |        |      |      |
| HETATM14061 | H2 | PRP | 998 | 20.132 | 22.834 | 1.389  | 1.00 | 0.00 |
| H           |    |     |     |        |        |        |      |      |
| HETATM14062 | H3 | PRP | 998 | 19.677 | 21.376 | 2.042  | 1.00 | 0.00 |
| H           |    |     |     |        |        |        |      |      |
| HETATM14063 | C2 | PRP | 998 | 21.191 | 21.061 | 0.604  | 1.00 | 0.00 |
| C           |    |     |     |        |        |        |      |      |
| HETATM14064 | H4 | PRP | 998 | 22.049 | 21.030 | 1.276  | 1.00 | 0.00 |
| H           |    |     |     |        |        |        |      |      |
| HETATM14065 | O2 | PRP | 998 | 21.737 | 21.757 | -0.501 | 1.00 | 0.00 |
| O           |    |     |     |        |        |        |      |      |
| HETATM14066 | H5 | PRP | 998 | 21.054 | 21.929 | -1.153 | 1.00 | 0.00 |
| H           |    |     |     |        |        |        |      |      |
| HETATM14067 | C3 | PRP | 998 | 21.027 | 19.559 | 0.227  | 1.00 | 0.00 |
| C           |    |     |     |        |        |        |      |      |
| HETATM14068 | H6 | PRP | 998 | 20.626 | 19.057 | 1.108  | 1.00 | 0.00 |
| H           |    |     |     |        |        |        |      |      |
| HETATM14069 | H7 | PRP | 998 | 20.280 | 19.440 | -0.557 | 1.00 | 0.00 |
| H           |    |     |     |        |        |        |      |      |
| HETATM14070 | H8 | PRP | 998 | 21.924 | 19.106 | -0.197 | 1.00 | 0.00 |
| H           |    |     |     |        |        |        |      |      |
| HETATM14071 | O1 | PRP | 999 | 21.433 | 23.534 | 9.188  | 1.00 | 0.00 |
| O           |    |     |     |        |        |        |      |      |
| HETATM14072 | H1 | PRP | 999 | 21.072 | 24.407 | 9.360  | 1.00 | 0.00 |
| H           |    |     |     |        |        |        |      |      |
| HETATM14073 | C1 | PRP | 999 | 20.773 | 22.767 | 8.166  | 1.00 | 0.00 |
| C           |    |     |     |        |        |        |      |      |
| HETATM14074 | H2 | PRP | 999 | 21.252 | 21.824 | 7.901  | 1.00 | 0.00 |
| H           |    |     |     |        |        |        |      |      |
| HETATM14075 | H3 | PRP | 999 | 19.783 | 22.431 | 8.474  | 1.00 | 0.00 |
| H           |    |     |     |        |        |        |      |      |
| HETATM14076 | C2 | PRP | 999 | 20.738 | 23.646 | 6.949  | 1.00 | 0.00 |
| C           |    |     |     |        |        |        |      |      |
| HETATM14077 | H4 | PRP | 999 | 21.771 | 23.716 | 6.607  | 1.00 | 0.00 |
| H           |    |     |     |        |        |        |      |      |
| HETATM14078 | O2 | PRP | 999 | 20.066 | 24.887 | 7.271  | 1.00 | 0.00 |
| O           |    |     |     |        |        |        |      |      |
| HETATM14079 | H5 | PRP | 999 | 20.753 | 25.423 | 7.675  | 1.00 | 0.00 |
| H           |    |     |     |        |        |        |      |      |
| HETATM14080 | C3 | PRP | 999 | 20.005 | 23.035 | 5.762  | 1.00 | 0.00 |
| C           |    |     |     |        |        |        |      |      |
| HETATM14081 | H6 | PRP | 999 | 19.129 | 23.611 | 5.462  | 1.00 | 0.00 |
| H           |    |     |     |        |        |        |      |      |
| HETATM14082 | H7 | PRP | 999 | 20.670 | 22.895 | 4.910  | 1.00 | 0.00 |
| H           |    |     |     |        |        |        |      |      |
| HETATM14083 | H8 | PRP | 999 | 19.682 | 22.051 | 6.103  | 1.00 | 0.00 |
| H           |    |     |     |        |        |        |      |      |

|             |    |     |      |        |        |        |      |      |
|-------------|----|-----|------|--------|--------|--------|------|------|
| HETATM14084 | O1 | PRP | 1000 | 15.406 | 11.070 | 8.333  | 1.00 | 0.00 |
| O           |    |     |      |        |        |        |      |      |
| HETATM14085 | H1 | PRP | 1000 | 15.418 | 10.973 | 9.288  | 1.00 | 0.00 |
| H           |    |     |      |        |        |        |      |      |
| HETATM14086 | C1 | PRP | 1000 | 14.209 | 11.603 | 7.956  | 1.00 | 0.00 |
| C           |    |     |      |        |        |        |      |      |
| HETATM14087 | H2 | PRP | 1000 | 13.501 | 10.824 | 7.670  | 1.00 | 0.00 |
| H           |    |     |      |        |        |        |      |      |
| HETATM14088 | H3 | PRP | 1000 | 13.741 | 12.048 | 8.834  | 1.00 | 0.00 |
| H           |    |     |      |        |        |        |      |      |
| HETATM14089 | C2 | PRP | 1000 | 14.415 | 12.689 | 6.867  | 1.00 | 0.00 |
| C           |    |     |      |        |        |        |      |      |
| HETATM14090 | H4 | PRP | 1000 | 14.708 | 12.206 | 5.935  | 1.00 | 0.00 |
| H           |    |     |      |        |        |        |      |      |
| HETATM14091 | O2 | PRP | 1000 | 15.293 | 13.698 | 7.222  | 1.00 | 0.00 |
| O           |    |     |      |        |        |        |      |      |
| HETATM14092 | H5 | PRP | 1000 | 16.118 | 13.212 | 7.148  | 1.00 | 0.00 |
| H           |    |     |      |        |        |        |      |      |
| HETATM14093 | C3 | PRP | 1000 | 13.077 | 13.286 | 6.680  | 1.00 | 0.00 |
| C           |    |     |      |        |        |        |      |      |
| HETATM14094 | H6 | PRP | 1000 | 12.359 | 12.492 | 6.476  | 1.00 | 0.00 |
| H           |    |     |      |        |        |        |      |      |
| HETATM14095 | H7 | PRP | 1000 | 12.738 | 13.758 | 7.602  | 1.00 | 0.00 |
| H           |    |     |      |        |        |        |      |      |
| HETATM14096 | H8 | PRP | 1000 | 13.033 | 13.909 | 5.787  | 1.00 | 0.00 |
| H           |    |     |      |        |        |        |      |      |
| HETATM14097 | O1 | PRP | 1001 | 26.456 | 31.498 | -0.149 | 1.00 | 0.00 |
| O           |    |     |      |        |        |        |      |      |
| HETATM14098 | H1 | PRP | 1001 | 25.619 | 31.648 | -0.595 | 1.00 | 0.00 |
| H           |    |     |      |        |        |        |      |      |
| HETATM14099 | C1 | PRP | 1001 | 26.390 | 30.231 | 0.537  | 1.00 | 0.00 |
| C           |    |     |      |        |        |        |      |      |
| HETATM14100 | H2 | PRP | 1001 | 26.519 | 29.409 | -0.168 | 1.00 | 0.00 |
| H           |    |     |      |        |        |        |      |      |
| HETATM14101 | H3 | PRP | 1001 | 27.217 | 30.238 | 1.247  | 1.00 | 0.00 |
| H           |    |     |      |        |        |        |      |      |
| HETATM14102 | C2 | PRP | 1001 | 25.030 | 30.190 | 1.197  | 1.00 | 0.00 |
| C           |    |     |      |        |        |        |      |      |
| HETATM14103 | H4 | PRP | 1001 | 24.224 | 30.591 | 0.583  | 1.00 | 0.00 |
| H           |    |     |      |        |        |        |      |      |
| HETATM14104 | O2 | PRP | 1001 | 25.171 | 30.938 | 2.393  | 1.00 | 0.00 |
| O           |    |     |      |        |        |        |      |      |
| HETATM14105 | H5 | PRP | 1001 | 25.658 | 31.716 | 2.111  | 1.00 | 0.00 |
| H           |    |     |      |        |        |        |      |      |
| HETATM14106 | C3 | PRP | 1001 | 24.542 | 28.786 | 1.597  | 1.00 | 0.00 |
| C           |    |     |      |        |        |        |      |      |
| HETATM14107 | H6 | PRP | 1001 | 24.521 | 28.240 | 0.654  | 1.00 | 0.00 |
| H           |    |     |      |        |        |        |      |      |
| HETATM14108 | H7 | PRP | 1001 | 25.341 | 28.340 | 2.189  | 1.00 | 0.00 |
| H           |    |     |      |        |        |        |      |      |
| HETATM14109 | H8 | PRP | 1001 | 23.597 | 28.793 | 2.139  | 1.00 | 0.00 |
| H           |    |     |      |        |        |        |      |      |
| HETATM14110 | O1 | PRP | 1002 | 23.456 | 20.850 | -4.278 | 1.00 | 0.00 |
| O           |    |     |      |        |        |        |      |      |
| HETATM14111 | H1 | PRP | 1002 | 24.265 | 21.142 | -3.851 | 1.00 | 0.00 |
| H           |    |     |      |        |        |        |      |      |

|             |    |     |      |        |        |        |      |      |
|-------------|----|-----|------|--------|--------|--------|------|------|
| HETATM14112 | C1 | PRP | 1002 | 22.915 | 21.895 | -5.064 | 1.00 | 0.00 |
| C           |    |     |      |        |        |        |      |      |
| HETATM14113 | H2 | PRP | 1002 | 22.342 | 22.479 | -4.343 | 1.00 | 0.00 |
| H           |    |     |      |        |        |        |      |      |
| HETATM14114 | H3 | PRP | 1002 | 23.640 | 22.524 | -5.580 | 1.00 | 0.00 |
| H           |    |     |      |        |        |        |      |      |
| HETATM14115 | C2 | PRP | 1002 | 22.015 | 21.274 | -6.136 | 1.00 | 0.00 |
| C           |    |     |      |        |        |        |      |      |
| HETATM14116 | H4 | PRP | 1002 | 21.129 | 20.788 | -5.728 | 1.00 | 0.00 |
| H           |    |     |      |        |        |        |      |      |
| HETATM14117 | O2 | PRP | 1002 | 22.623 | 20.298 | -6.937 | 1.00 | 0.00 |
| O           |    |     |      |        |        |        |      |      |
| HETATM14118 | H5 | PRP | 1002 | 23.451 | 19.978 | -6.572 | 1.00 | 0.00 |
| H           |    |     |      |        |        |        |      |      |
| HETATM14119 | C3 | PRP | 1002 | 21.438 | 22.438 | -7.016 | 1.00 | 0.00 |
| C           |    |     |      |        |        |        |      |      |
| HETATM14120 | H6 | PRP | 1002 | 22.230 | 23.059 | -7.435 | 1.00 | 0.00 |
| H           |    |     |      |        |        |        |      |      |
| HETATM14121 | H7 | PRP | 1002 | 20.755 | 22.112 | -7.801 | 1.00 | 0.00 |
| H           |    |     |      |        |        |        |      |      |
| HETATM14122 | H8 | PRP | 1002 | 20.888 | 23.078 | -6.326 | 1.00 | 0.00 |
| H           |    |     |      |        |        |        |      |      |
| HETATM14123 | O1 | PRP | 1003 | 13.550 | 20.720 | 8.911  | 1.00 | 0.00 |
| O           |    |     |      |        |        |        |      |      |
| HETATM14124 | H1 | PRP | 1003 | 13.768 | 20.211 | 9.695  | 1.00 | 0.00 |
| H           |    |     |      |        |        |        |      |      |
| HETATM14125 | C1 | PRP | 1003 | 14.567 | 21.772 | 9.065  | 1.00 | 0.00 |
| C           |    |     |      |        |        |        |      |      |
| HETATM14126 | H2 | PRP | 1003 | 14.360 | 22.685 | 8.505  | 1.00 | 0.00 |
| H           |    |     |      |        |        |        |      |      |
| HETATM14127 | H3 | PRP | 1003 | 14.747 | 21.994 | 10.116 | 1.00 | 0.00 |
| H           |    |     |      |        |        |        |      |      |
| HETATM14128 | C2 | PRP | 1003 | 15.859 | 21.132 | 8.531  | 1.00 | 0.00 |
| C           |    |     |      |        |        |        |      |      |
| HETATM14129 | H4 | PRP | 1003 | 15.648 | 20.565 | 7.625  | 1.00 | 0.00 |
| H           |    |     |      |        |        |        |      |      |
| HETATM14130 | O2 | PRP | 1003 | 16.292 | 20.268 | 9.539  | 1.00 | 0.00 |
| O           |    |     |      |        |        |        |      |      |
| HETATM14131 | H5 | PRP | 1003 | 17.052 | 19.832 | 9.147  | 1.00 | 0.00 |
| H           |    |     |      |        |        |        |      |      |
| HETATM14132 | C3 | PRP | 1003 | 16.866 | 22.219 | 8.303  | 1.00 | 0.00 |
| C           |    |     |      |        |        |        |      |      |
| HETATM14133 | H6 | PRP | 1003 | 17.315 | 22.496 | 9.257  | 1.00 | 0.00 |
| H           |    |     |      |        |        |        |      |      |
| HETATM14134 | H7 | PRP | 1003 | 17.659 | 21.847 | 7.655  | 1.00 | 0.00 |
| H           |    |     |      |        |        |        |      |      |
| HETATM14135 | H8 | PRP | 1003 | 16.359 | 23.087 | 7.881  | 1.00 | 0.00 |
| H           |    |     |      |        |        |        |      |      |
| HETATM14136 | O1 | PRP | 1004 | 15.917 | 22.593 | 5.102  | 1.00 | 0.00 |
| O           |    |     |      |        |        |        |      |      |
| HETATM14137 | H1 | PRP | 1004 | 15.435 | 23.379 | 5.372  | 1.00 | 0.00 |
| H           |    |     |      |        |        |        |      |      |
| HETATM14138 | C1 | PRP | 1004 | 15.071 | 21.584 | 4.580  | 1.00 | 0.00 |
| C           |    |     |      |        |        |        |      |      |
| HETATM14139 | H2 | PRP | 1004 | 15.804 | 20.893 | 4.165  | 1.00 | 0.00 |
| H           |    |     |      |        |        |        |      |      |

|             |    |     |      |        |        |       |      |      |
|-------------|----|-----|------|--------|--------|-------|------|------|
| HETATM14140 | H3 | PRP | 1004 | 14.391 | 21.210 | 5.346 | 1.00 | 0.00 |
| H           |    |     |      |        |        |       |      |      |
| HETATM14141 | C2 | PRP | 1004 | 14.154 | 22.270 | 3.567 | 1.00 | 0.00 |
| C           |    |     |      |        |        |       |      |      |
| HETATM14142 | H4 | PRP | 1004 | 14.688 | 22.918 | 2.871 | 1.00 | 0.00 |
| H           |    |     |      |        |        |       |      |      |
| HETATM14143 | O2 | PRP | 1004 | 13.157 | 23.034 | 4.256 | 1.00 | 0.00 |
| O           |    |     |      |        |        |       |      |      |
| HETATM14144 | H5 | PRP | 1004 | 12.848 | 22.524 | 5.008 | 1.00 | 0.00 |
| H           |    |     |      |        |        |       |      |      |
| HETATM14145 | C3 | PRP | 1004 | 13.326 | 21.212 | 2.852 | 1.00 | 0.00 |
| C           |    |     |      |        |        |       |      |      |
| HETATM14146 | H6 | PRP | 1004 | 12.661 | 20.685 | 3.537 | 1.00 | 0.00 |
| H           |    |     |      |        |        |       |      |      |
| HETATM14147 | H7 | PRP | 1004 | 12.601 | 21.580 | 2.127 | 1.00 | 0.00 |
| H           |    |     |      |        |        |       |      |      |
| HETATM14148 | H8 | PRP | 1004 | 14.045 | 20.547 | 2.373 | 1.00 | 0.00 |
| H           |    |     |      |        |        |       |      |      |
| HETATM14149 | O1 | PRP | 1005 | 2.262  | 21.147 | 3.341 | 1.00 | 0.00 |
| O           |    |     |      |        |        |       |      |      |
| HETATM14150 | H1 | PRP | 1005 | 2.494  | 20.478 | 2.693 | 1.00 | 0.00 |
| H           |    |     |      |        |        |       |      |      |
| HETATM14151 | C1 | PRP | 1005 | 3.422  | 21.936 | 3.520 | 1.00 | 0.00 |
| C           |    |     |      |        |        |       |      |      |
| HETATM14152 | H2 | PRP | 1005 | 3.188  | 22.705 | 4.257 | 1.00 | 0.00 |
| H           |    |     |      |        |        |       |      |      |
| HETATM14153 | H3 | PRP | 1005 | 4.163  | 21.387 | 4.101 | 1.00 | 0.00 |
| H           |    |     |      |        |        |       |      |      |
| HETATM14154 | C2 | PRP | 1005 | 3.951  | 22.553 | 2.159 | 1.00 | 0.00 |
| C           |    |     |      |        |        |       |      |      |
| HETATM14155 | H4 | PRP | 1005 | 3.113  | 23.033 | 1.654 | 1.00 | 0.00 |
| H           |    |     |      |        |        |       |      |      |
| HETATM14156 | O2 | PRP | 1005 | 4.379  | 21.479 | 1.317 | 1.00 | 0.00 |
| O           |    |     |      |        |        |       |      |      |
| HETATM14157 | H5 | PRP | 1005 | 4.274  | 21.781 | 0.412 | 1.00 | 0.00 |
| H           |    |     |      |        |        |       |      |      |
| HETATM14158 | C3 | PRP | 1005 | 5.074  | 23.569 | 2.454 | 1.00 | 0.00 |
| C           |    |     |      |        |        |       |      |      |
| HETATM14159 | H6 | PRP | 1005 | 5.936  | 23.132 | 2.959 | 1.00 | 0.00 |
| H           |    |     |      |        |        |       |      |      |
| HETATM14160 | H7 | PRP | 1005 | 5.565  | 23.886 | 1.534 | 1.00 | 0.00 |
| H           |    |     |      |        |        |       |      |      |
| HETATM14161 | H8 | PRP | 1005 | 4.688  | 24.437 | 2.988 | 1.00 | 0.00 |
| H           |    |     |      |        |        |       |      |      |
| HETATM14162 | O1 | PRP | 1006 | 18.812 | 19.464 | 8.465 | 1.00 | 0.00 |
| O           |    |     |      |        |        |       |      |      |
| HETATM14163 | H1 | PRP | 1006 | 19.197 | 19.648 | 9.326 | 1.00 | 0.00 |
| H           |    |     |      |        |        |       |      |      |
| HETATM14164 | C1 | PRP | 1006 | 19.846 | 18.664 | 7.947 | 1.00 | 0.00 |
| C           |    |     |      |        |        |       |      |      |
| HETATM14165 | H2 | PRP | 1006 | 20.612 | 19.363 | 7.611 | 1.00 | 0.00 |
| H           |    |     |      |        |        |       |      |      |
| HETATM14166 | H3 | PRP | 1006 | 20.213 | 17.978 | 8.711 | 1.00 | 0.00 |
| H           |    |     |      |        |        |       |      |      |
| HETATM14167 | C2 | PRP | 1006 | 19.209 | 17.952 | 6.728 | 1.00 | 0.00 |
| C           |    |     |      |        |        |       |      |      |

|             |    |     |      |        |        |        |      |      |
|-------------|----|-----|------|--------|--------|--------|------|------|
| HETATM14168 | H4 | PRP | 1006 | 20.042 | 17.717 | 6.066  | 1.00 | 0.00 |
| H           |    |     |      |        |        |        |      |      |
| HETATM14169 | O2 | PRP | 1006 | 18.326 | 18.774 | 5.953  | 1.00 | 0.00 |
| O           |    |     |      |        |        |        |      |      |
| HETATM14170 | H5 | PRP | 1006 | 18.210 | 19.579 | 6.464  | 1.00 | 0.00 |
| H           |    |     |      |        |        |        |      |      |
| HETATM14171 | C3 | PRP | 1006 | 18.436 | 16.703 | 7.061  | 1.00 | 0.00 |
| C           |    |     |      |        |        |        |      |      |
| HETATM14172 | H6 | PRP | 1006 | 18.064 | 16.257 | 6.139  | 1.00 | 0.00 |
| H           |    |     |      |        |        |        |      |      |
| HETATM14173 | H7 | PRP | 1006 | 19.091 | 15.977 | 7.542  | 1.00 | 0.00 |
| H           |    |     |      |        |        |        |      |      |
| HETATM14174 | H8 | PRP | 1006 | 17.573 | 16.911 | 7.694  | 1.00 | 0.00 |
| H           |    |     |      |        |        |        |      |      |
| HETATM14175 | O1 | PRP | 1007 | 19.660 | 21.211 | -2.632 | 1.00 | 0.00 |
| O           |    |     |      |        |        |        |      |      |
| HETATM14176 | H1 | PRP | 1007 | 20.236 | 20.469 | -2.832 | 1.00 | 0.00 |
| H           |    |     |      |        |        |        |      |      |
| HETATM14177 | C1 | PRP | 1007 | 18.301 | 20.908 | -2.862 | 1.00 | 0.00 |
| C           |    |     |      |        |        |        |      |      |
| HETATM14178 | H2 | PRP | 1007 | 18.115 | 20.091 | -2.164 | 1.00 | 0.00 |
| H           |    |     |      |        |        |        |      |      |
| HETATM14179 | H3 | PRP | 1007 | 17.680 | 21.752 | -2.564 | 1.00 | 0.00 |
| H           |    |     |      |        |        |        |      |      |
| HETATM14180 | C2 | PRP | 1007 | 18.054 | 20.590 | -4.422 | 1.00 | 0.00 |
| C           |    |     |      |        |        |        |      |      |
| HETATM14181 | H4 | PRP | 1007 | 17.045 | 20.181 | -4.455 | 1.00 | 0.00 |
| H           |    |     |      |        |        |        |      |      |
| HETATM14182 | O2 | PRP | 1007 | 18.924 | 19.549 | -4.856 | 1.00 | 0.00 |
| O           |    |     |      |        |        |        |      |      |
| HETATM14183 | H5 | PRP | 1007 | 18.636 | 18.726 | -4.454 | 1.00 | 0.00 |
| H           |    |     |      |        |        |        |      |      |
| HETATM14184 | C3 | PRP | 1007 | 18.155 | 21.838 | -5.303 | 1.00 | 0.00 |
| C           |    |     |      |        |        |        |      |      |
| HETATM14185 | H6 | PRP | 1007 | 18.368 | 21.466 | -6.305 | 1.00 | 0.00 |
| H           |    |     |      |        |        |        |      |      |
| HETATM14186 | H7 | PRP | 1007 | 17.318 | 22.512 | -5.114 | 1.00 | 0.00 |
| H           |    |     |      |        |        |        |      |      |
| HETATM14187 | H8 | PRP | 1007 | 19.031 | 22.412 | -5.002 | 1.00 | 0.00 |
| H           |    |     |      |        |        |        |      |      |
| CONECT      | 1  | 5   | 3    | 2      |        |        |      |      |
| CONECT      | 27 | 30  | 29   | 28     | 24     |        |      |      |
| CONECT      | 33 | 35  | 34   | 31     |        |        |      |      |
| CONECT      | 35 | 38  | 37   | 36     | 33     |        |      |      |
| CONECT      | 38 | 41  | 40   | 39     | 35     |        |      |      |
| CONECT      | 41 | 44  | 43   | 42     | 38     |        |      |      |
| CONECT      | 44 | 47  | 46   | 45     | 41     |        |      |      |
| CONECT      | 47 | 50  | 49   | 48     | 44     |        |      |      |
| CONECT      | 50 | 53  | 52   | 51     | 47     |        |      |      |
| CONECT      | 53 | 56  | 55   | 54     | 50     |        |      |      |
| CONECT      | 56 | 59  | 58   | 57     | 53     |        |      |      |
| CONECT      | 3  | 78  | 4    | 1      |        |        |      |      |
| CONECT      | 59 | 62  | 61   | 60     | 56     |        |      |      |
| CONECT      | 62 | 65  | 64   | 63     | 59     |        |      |      |
| CONECT      | 65 | 68  | 67   | 66     | 62     |        |      |      |
| CONECT      | 68 | 71  | 70   | 69     | 65     |        |      |      |
| CONECT      | 71 | 74  | 73   | 72     | 68     |        |      |      |

|         |     |     |     |     |     |
|---------|-----|-----|-----|-----|-----|
| CONNECT | 74  | 77  | 76  | 75  | 71  |
| CONNECT | 80  | 83  | 82  | 81  | 78  |
| CONNECT | 83  | 86  | 85  | 84  | 80  |
| CONNECT | 86  | 89  | 88  | 87  | 83  |
| CONNECT | 89  | 92  | 91  | 90  | 86  |
| CONNECT | 7   | 10  | 9   | 8   | 5   |
| CONNECT | 92  | 104 | 94  | 93  | 89  |
| CONNECT | 94  | 96  | 95  | 92  |     |
| CONNECT | 97  | 100 | 99  | 98  | 96  |
| CONNECT | 100 | 103 | 102 | 101 | 97  |
| CONNECT | 106 | 108 | 107 | 104 |     |
| CONNECT | 108 | 111 | 110 | 109 | 106 |
| CONNECT | 111 | 114 | 113 | 112 | 108 |
| CONNECT | 114 | 117 | 116 | 115 | 111 |
| CONNECT | 117 | 120 | 119 | 118 | 114 |
| CONNECT | 120 | 123 | 122 | 121 | 117 |
| CONNECT | 10  | 13  | 12  | 11  | 7   |
| CONNECT | 123 | 126 | 125 | 124 | 120 |
| CONNECT | 126 | 129 | 128 | 127 | 123 |
| CONNECT | 129 | 132 | 131 | 130 | 126 |
| CONNECT | 132 | 135 | 134 | 133 | 129 |
| CONNECT | 135 | 138 | 137 | 136 | 132 |
| CONNECT | 138 | 141 | 140 | 139 | 135 |
| CONNECT | 141 | 144 | 143 | 142 | 138 |
| CONNECT | 144 | 147 | 146 | 145 | 141 |
| CONNECT | 147 | 150 | 149 | 148 | 144 |
| CONNECT | 13  | 16  | 15  | 14  | 10  |
| CONNECT | 16  | 19  | 18  | 17  | 13  |
| CONNECT | 19  | 31  | 21  | 20  | 16  |
| CONNECT | 21  | 23  | 22  | 19  |     |
| CONNECT | 24  | 27  | 26  | 25  | 23  |
| CONNECT | 6   | 5   |     |     |     |
| CONNECT | 20  | 19  |     |     |     |
| CONNECT | 25  | 24  |     |     |     |
| CONNECT | 26  | 24  |     |     |     |
| CONNECT | 28  | 27  |     |     |     |
| CONNECT | 29  | 27  |     |     |     |
| CONNECT | 30  | 27  |     |     |     |
| CONNECT | 32  | 31  |     |     |     |
| CONNECT | 36  | 35  |     |     |     |
| CONNECT | 37  | 35  |     |     |     |
| CONNECT | 39  | 38  |     |     |     |
| CONNECT | 8   | 7   |     |     |     |
| CONNECT | 40  | 38  |     |     |     |
| CONNECT | 42  | 41  |     |     |     |
| CONNECT | 43  | 41  |     |     |     |
| CONNECT | 45  | 44  |     |     |     |
| CONNECT | 46  | 44  |     |     |     |
| CONNECT | 48  | 47  |     |     |     |
| CONNECT | 49  | 47  |     |     |     |
| CONNECT | 51  | 50  |     |     |     |
| CONNECT | 52  | 50  |     |     |     |
| CONNECT | 54  | 53  |     |     |     |
| CONNECT | 9   | 7   |     |     |     |
| CONNECT | 55  | 53  |     |     |     |
| CONNECT | 57  | 56  |     |     |     |
| CONNECT | 58  | 56  |     |     |     |

|        |     |     |
|--------|-----|-----|
| CONECT | 60  | 59  |
| CONECT | 61  | 59  |
| CONECT | 63  | 62  |
| CONECT | 64  | 62  |
| CONECT | 66  | 65  |
| CONECT | 67  | 65  |
| CONECT | 69  | 68  |
| CONECT | 11  | 10  |
| CONECT | 70  | 68  |
| CONECT | 72  | 71  |
| CONECT | 73  | 71  |
| CONECT | 75  | 74  |
| CONECT | 76  | 74  |
| CONECT | 77  | 74  |
| CONECT | 79  | 78  |
| CONECT | 81  | 80  |
| CONECT | 82  | 80  |
| CONECT | 84  | 83  |
| CONECT | 12  | 10  |
| CONECT | 85  | 83  |
| CONECT | 87  | 86  |
| CONECT | 88  | 86  |
| CONECT | 90  | 89  |
| CONECT | 91  | 89  |
| CONECT | 93  | 92  |
| CONECT | 98  | 97  |
| CONECT | 99  | 97  |
| CONECT | 101 | 100 |
| CONECT | 102 | 100 |
| CONECT | 14  | 13  |
| CONECT | 103 | 100 |
| CONECT | 105 | 104 |
| CONECT | 109 | 108 |
| CONECT | 110 | 108 |
| CONECT | 112 | 111 |
| CONECT | 113 | 111 |
| CONECT | 115 | 114 |
| CONECT | 116 | 114 |
| CONECT | 118 | 117 |
| CONECT | 119 | 117 |
| CONECT | 15  | 13  |
| CONECT | 121 | 120 |
| CONECT | 122 | 120 |
| CONECT | 124 | 123 |
| CONECT | 125 | 123 |
| CONECT | 127 | 126 |
| CONECT | 128 | 126 |
| CONECT | 130 | 129 |
| CONECT | 131 | 129 |
| CONECT | 133 | 132 |
| CONECT | 134 | 132 |
| CONECT | 17  | 16  |
| CONECT | 136 | 135 |
| CONECT | 137 | 135 |
| CONECT | 139 | 138 |
| CONECT | 140 | 138 |
| CONECT | 142 | 141 |



|         |     |     |     |     |     |
|---------|-----|-----|-----|-----|-----|
| CONNECT | 143 | 141 |     |     |     |
| CONNECT | 145 | 144 |     |     |     |
| CONNECT | 146 | 144 |     |     |     |
| CONNECT | 148 | 147 |     |     |     |
| CONNECT | 149 | 147 |     |     |     |
| CONNECT | 18  | 16  |     |     |     |
| CONNECT | 150 | 147 |     |     |     |
| CONNECT | 5   | 7   | 6   | 1   |     |
| CONNECT | 31  | 33  | 32  | 19  |     |
| CONNECT | 78  | 80  | 79  | 3   |     |
| CONNECT | 104 | 106 | 105 | 92  |     |
| CONNECT | 2   | 1   |     |     |     |
| CONNECT | 4   | 3   |     |     |     |
| CONNECT | 22  | 21  |     |     |     |
| CONNECT | 23  | 24  | 21  |     |     |
| CONNECT | 34  | 33  |     |     |     |
| CONNECT | 95  | 94  |     |     |     |
| CONNECT | 96  | 97  | 94  |     |     |
| CONNECT | 107 | 106 |     |     |     |
| CONNECT | 151 | 155 | 153 | 152 |     |
| CONNECT | 177 | 180 | 179 | 178 | 174 |
| CONNECT | 183 | 185 | 184 | 181 |     |
| CONNECT | 185 | 188 | 187 | 186 | 183 |
| CONNECT | 188 | 191 | 190 | 189 | 185 |
| CONNECT | 191 | 194 | 193 | 192 | 188 |
| CONNECT | 194 | 197 | 196 | 195 | 191 |
| CONNECT | 197 | 200 | 199 | 198 | 194 |
| CONNECT | 200 | 203 | 202 | 201 | 197 |
| CONNECT | 203 | 206 | 205 | 204 | 200 |
| CONNECT | 206 | 209 | 208 | 207 | 203 |
| CONNECT | 153 | 228 | 154 | 151 |     |
| CONNECT | 209 | 212 | 211 | 210 | 206 |
| CONNECT | 212 | 215 | 214 | 213 | 209 |
| CONNECT | 215 | 218 | 217 | 216 | 212 |
| CONNECT | 218 | 221 | 220 | 219 | 215 |
| CONNECT | 221 | 224 | 223 | 222 | 218 |
| CONNECT | 224 | 227 | 226 | 225 | 221 |
| CONNECT | 230 | 233 | 232 | 231 | 228 |
| CONNECT | 233 | 236 | 235 | 234 | 230 |
| CONNECT | 236 | 239 | 238 | 237 | 233 |
| CONNECT | 239 | 242 | 241 | 240 | 236 |
| CONNECT | 157 | 160 | 159 | 158 | 155 |
| CONNECT | 242 | 254 | 244 | 243 | 239 |
| CONNECT | 244 | 246 | 245 | 242 |     |
| CONNECT | 247 | 250 | 249 | 248 | 246 |
| CONNECT | 250 | 253 | 252 | 251 | 247 |
| CONNECT | 256 | 258 | 257 | 254 |     |
| CONNECT | 258 | 261 | 260 | 259 | 256 |
| CONNECT | 261 | 264 | 263 | 262 | 258 |
| CONNECT | 264 | 267 | 266 | 265 | 261 |
| CONNECT | 267 | 270 | 269 | 268 | 264 |
| CONNECT | 270 | 273 | 272 | 271 | 267 |
| CONNECT | 160 | 163 | 162 | 161 | 157 |
| CONNECT | 273 | 276 | 275 | 274 | 270 |
| CONNECT | 276 | 279 | 278 | 277 | 273 |
| CONNECT | 279 | 282 | 281 | 280 | 276 |
| CONNECT | 282 | 285 | 284 | 283 | 279 |

|         |     |     |     |     |     |
|---------|-----|-----|-----|-----|-----|
| CONNECT | 285 | 288 | 287 | 286 | 282 |
| CONNECT | 288 | 291 | 290 | 289 | 285 |
| CONNECT | 291 | 294 | 293 | 292 | 288 |
| CONNECT | 294 | 297 | 296 | 295 | 291 |
| CONNECT | 297 | 300 | 299 | 298 | 294 |
| CONNECT | 163 | 166 | 165 | 164 | 160 |
| CONNECT | 166 | 169 | 168 | 167 | 163 |
| CONNECT | 169 | 181 | 171 | 170 | 166 |
| CONNECT | 171 | 173 | 172 | 169 |     |
| CONNECT | 174 | 177 | 176 | 175 | 173 |
| CONNECT | 156 | 155 |     |     |     |
| CONNECT | 170 | 169 |     |     |     |
| CONNECT | 175 | 174 |     |     |     |
| CONNECT | 176 | 174 |     |     |     |
| CONNECT | 178 | 177 |     |     |     |
| CONNECT | 179 | 177 |     |     |     |
| CONNECT | 180 | 177 |     |     |     |
| CONNECT | 182 | 181 |     |     |     |
| CONNECT | 186 | 185 |     |     |     |
| CONNECT | 187 | 185 |     |     |     |
| CONNECT | 189 | 188 |     |     |     |
| CONNECT | 158 | 157 |     |     |     |
| CONNECT | 190 | 188 |     |     |     |
| CONNECT | 192 | 191 |     |     |     |
| CONNECT | 193 | 191 |     |     |     |
| CONNECT | 195 | 194 |     |     |     |
| CONNECT | 196 | 194 |     |     |     |
| CONNECT | 198 | 197 |     |     |     |
| CONNECT | 199 | 197 |     |     |     |
| CONNECT | 201 | 200 |     |     |     |
| CONNECT | 202 | 200 |     |     |     |
| CONNECT | 204 | 203 |     |     |     |
| CONNECT | 159 | 157 |     |     |     |
| CONNECT | 205 | 203 |     |     |     |
| CONNECT | 207 | 206 |     |     |     |
| CONNECT | 208 | 206 |     |     |     |
| CONNECT | 210 | 209 |     |     |     |
| CONNECT | 211 | 209 |     |     |     |
| CONNECT | 213 | 212 |     |     |     |
| CONNECT | 214 | 212 |     |     |     |
| CONNECT | 216 | 215 |     |     |     |
| CONNECT | 217 | 215 |     |     |     |
| CONNECT | 219 | 218 |     |     |     |
| CONNECT | 161 | 160 |     |     |     |
| CONNECT | 220 | 218 |     |     |     |
| CONNECT | 222 | 221 |     |     |     |
| CONNECT | 223 | 221 |     |     |     |
| CONNECT | 225 | 224 |     |     |     |
| CONNECT | 226 | 224 |     |     |     |
| CONNECT | 227 | 224 |     |     |     |
| CONNECT | 229 | 228 |     |     |     |
| CONNECT | 231 | 230 |     |     |     |
| CONNECT | 232 | 230 |     |     |     |
| CONNECT | 234 | 233 |     |     |     |
| CONNECT | 162 | 160 |     |     |     |
| CONNECT | 235 | 233 |     |     |     |
| CONNECT | 237 | 236 |     |     |     |

|         |     |     |     |     |     |
|---------|-----|-----|-----|-----|-----|
| CONNECT | 238 | 236 |     |     |     |
| CONNECT | 240 | 239 |     |     |     |
| CONNECT | 241 | 239 |     |     |     |
| CONNECT | 243 | 242 |     |     |     |
| CONNECT | 248 | 247 |     |     |     |
| CONNECT | 249 | 247 |     |     |     |
| CONNECT | 251 | 250 |     |     |     |
| CONNECT | 252 | 250 |     |     |     |
| CONNECT | 164 | 163 |     |     |     |
| CONNECT | 253 | 250 |     |     |     |
| CONNECT | 255 | 254 |     |     |     |
| CONNECT | 259 | 258 |     |     |     |
| CONNECT | 260 | 258 |     |     |     |
| CONNECT | 262 | 261 |     |     |     |
| CONNECT | 263 | 261 |     |     |     |
| CONNECT | 265 | 264 |     |     |     |
| CONNECT | 266 | 264 |     |     |     |
| CONNECT | 268 | 267 |     |     |     |
| CONNECT | 269 | 267 |     |     |     |
| CONNECT | 165 | 163 |     |     |     |
| CONNECT | 271 | 270 |     |     |     |
| CONNECT | 272 | 270 |     |     |     |
| CONNECT | 274 | 273 |     |     |     |
| CONNECT | 275 | 273 |     |     |     |
| CONNECT | 277 | 276 |     |     |     |
| CONNECT | 278 | 276 |     |     |     |
| CONNECT | 280 | 279 |     |     |     |
| CONNECT | 281 | 279 |     |     |     |
| CONNECT | 283 | 282 |     |     |     |
| CONNECT | 284 | 282 |     |     |     |
| CONNECT | 167 | 166 |     |     |     |
| CONNECT | 286 | 285 |     |     |     |
| CONNECT | 287 | 285 |     |     |     |
| CONNECT | 289 | 288 |     |     |     |
| CONNECT | 290 | 288 |     |     |     |
| CONNECT | 292 | 291 |     |     |     |
| CONNECT | 293 | 291 |     |     |     |
| CONNECT | 295 | 294 |     |     |     |
| CONNECT | 296 | 294 |     |     |     |
| CONNECT | 298 | 297 |     |     |     |
| CONNECT | 299 | 297 |     |     |     |
| CONNECT | 168 | 166 |     |     |     |
| CONNECT | 300 | 297 |     |     |     |
| CONNECT | 155 | 157 | 156 | 151 |     |
| CONNECT | 181 | 183 | 182 | 169 |     |
| CONNECT | 228 | 230 | 229 | 153 |     |
| CONNECT | 254 | 256 | 255 | 242 |     |
| CONNECT | 152 | 151 |     |     |     |
| CONNECT | 154 | 153 |     |     |     |
| CONNECT | 172 | 171 |     |     |     |
| CONNECT | 173 | 174 | 171 |     |     |
| CONNECT | 184 | 183 |     |     |     |
| CONNECT | 245 | 244 |     |     |     |
| CONNECT | 246 | 247 | 244 |     |     |
| CONNECT | 257 | 256 |     |     |     |
| CONNECT | 301 | 305 | 303 | 302 |     |
| CONNECT | 327 | 330 | 329 | 328 | 324 |

|         |     |     |     |     |     |
|---------|-----|-----|-----|-----|-----|
| CONNECT | 333 | 335 | 334 | 331 |     |
| CONNECT | 335 | 338 | 337 | 336 | 333 |
| CONNECT | 338 | 341 | 340 | 339 | 335 |
| CONNECT | 341 | 344 | 343 | 342 | 338 |
| CONNECT | 344 | 347 | 346 | 345 | 341 |
| CONNECT | 347 | 350 | 349 | 348 | 344 |
| CONNECT | 350 | 353 | 352 | 351 | 347 |
| CONNECT | 353 | 356 | 355 | 354 | 350 |
| CONNECT | 356 | 359 | 358 | 357 | 353 |
| CONNECT | 303 | 378 | 304 | 301 |     |
| CONNECT | 359 | 362 | 361 | 360 | 356 |
| CONNECT | 362 | 365 | 364 | 363 | 359 |
| CONNECT | 365 | 368 | 367 | 366 | 362 |
| CONNECT | 368 | 371 | 370 | 369 | 365 |
| CONNECT | 371 | 374 | 373 | 372 | 368 |
| CONNECT | 374 | 377 | 376 | 375 | 371 |
| CONNECT | 380 | 383 | 382 | 381 | 378 |
| CONNECT | 383 | 386 | 385 | 384 | 380 |
| CONNECT | 386 | 389 | 388 | 387 | 383 |
| CONNECT | 389 | 392 | 391 | 390 | 386 |
| CONNECT | 307 | 310 | 309 | 308 | 305 |
| CONNECT | 392 | 404 | 394 | 393 | 389 |
| CONNECT | 394 | 396 | 395 | 392 |     |
| CONNECT | 397 | 400 | 399 | 398 | 396 |
| CONNECT | 400 | 403 | 402 | 401 | 397 |
| CONNECT | 406 | 408 | 407 | 404 |     |
| CONNECT | 408 | 411 | 410 | 409 | 406 |
| CONNECT | 411 | 414 | 413 | 412 | 408 |
| CONNECT | 414 | 417 | 416 | 415 | 411 |
| CONNECT | 417 | 420 | 419 | 418 | 414 |
| CONNECT | 420 | 423 | 422 | 421 | 417 |
| CONNECT | 310 | 313 | 312 | 311 | 307 |
| CONNECT | 423 | 426 | 425 | 424 | 420 |
| CONNECT | 426 | 429 | 428 | 427 | 423 |
| CONNECT | 429 | 432 | 431 | 430 | 426 |
| CONNECT | 432 | 435 | 434 | 433 | 429 |
| CONNECT | 435 | 438 | 437 | 436 | 432 |
| CONNECT | 438 | 441 | 440 | 439 | 435 |
| CONNECT | 441 | 444 | 443 | 442 | 438 |
| CONNECT | 444 | 447 | 446 | 445 | 441 |
| CONNECT | 447 | 450 | 449 | 448 | 444 |
| CONNECT | 313 | 316 | 315 | 314 | 310 |
| CONNECT | 316 | 319 | 318 | 317 | 313 |
| CONNECT | 319 | 331 | 321 | 320 | 316 |
| CONNECT | 321 | 323 | 322 | 319 |     |
| CONNECT | 324 | 327 | 326 | 325 | 323 |
| CONNECT | 306 | 305 |     |     |     |
| CONNECT | 320 | 319 |     |     |     |
| CONNECT | 325 | 324 |     |     |     |
| CONNECT | 326 | 324 |     |     |     |
| CONNECT | 328 | 327 |     |     |     |
| CONNECT | 329 | 327 |     |     |     |
| CONNECT | 330 | 327 |     |     |     |
| CONNECT | 332 | 331 |     |     |     |
| CONNECT | 336 | 335 |     |     |     |
| CONNECT | 337 | 335 |     |     |     |
| CONNECT | 339 | 338 |     |     |     |

CONNECT 308 307  
CONNECT 340 338  
CONNECT 342 341  
CONNECT 343 341  
CONNECT 345 344  
CONNECT 346 344  
CONNECT 348 347  
CONNECT 349 347  
CONNECT 351 350  
CONNECT 352 350  
CONNECT 354 353  
CONNECT 309 307  
CONNECT 355 353  
CONNECT 357 356  
CONNECT 358 356  
CONNECT 360 359  
CONNECT 361 359  
CONNECT 363 362  
CONNECT 364 362  
CONNECT 366 365  
CONNECT 367 365  
CONNECT 369 368  
CONNECT 311 310  
CONNECT 370 368  
CONNECT 372 371  
CONNECT 373 371  
CONNECT 375 374  
CONNECT 376 374  
CONNECT 377 374  
CONNECT 379 378  
CONNECT 381 380  
CONNECT 382 380  
CONNECT 384 383  
CONNECT 312 310  
CONNECT 385 383  
CONNECT 387 386  
CONNECT 388 386  
CONNECT 390 389  
CONNECT 391 389  
CONNECT 393 392  
CONNECT 398 397  
CONNECT 399 397  
CONNECT 401 400  
CONNECT 402 400  
CONNECT 314 313  
CONNECT 403 400  
CONNECT 405 404  
CONNECT 409 408  
CONNECT 410 408  
CONNECT 412 411  
CONNECT 413 411  
CONNECT 415 414  
CONNECT 416 414  
CONNECT 418 417  
CONNECT 419 417  
CONNECT 315 313  
CONNECT 421 420

|         |     |     |     |     |     |
|---------|-----|-----|-----|-----|-----|
| CONNECT | 422 | 420 |     |     |     |
| CONNECT | 424 | 423 |     |     |     |
| CONNECT | 425 | 423 |     |     |     |
| CONNECT | 427 | 426 |     |     |     |
| CONNECT | 428 | 426 |     |     |     |
| CONNECT | 430 | 429 |     |     |     |
| CONNECT | 431 | 429 |     |     |     |
| CONNECT | 433 | 432 |     |     |     |
| CONNECT | 434 | 432 |     |     |     |
| CONNECT | 317 | 316 |     |     |     |
| CONNECT | 436 | 435 |     |     |     |
| CONNECT | 437 | 435 |     |     |     |
| CONNECT | 439 | 438 |     |     |     |
| CONNECT | 440 | 438 |     |     |     |
| CONNECT | 442 | 441 |     |     |     |
| CONNECT | 443 | 441 |     |     |     |
| CONNECT | 445 | 444 |     |     |     |
| CONNECT | 446 | 444 |     |     |     |
| CONNECT | 448 | 447 |     |     |     |
| CONNECT | 449 | 447 |     |     |     |
| CONNECT | 318 | 316 |     |     |     |
| CONNECT | 450 | 447 |     |     |     |
| CONNECT | 305 | 307 | 306 | 301 |     |
| CONNECT | 331 | 333 | 332 | 319 |     |
| CONNECT | 378 | 380 | 379 | 303 |     |
| CONNECT | 404 | 406 | 405 | 392 |     |
| CONNECT | 302 | 301 |     |     |     |
| CONNECT | 304 | 303 |     |     |     |
| CONNECT | 322 | 321 |     |     |     |
| CONNECT | 323 | 324 | 321 |     |     |
| CONNECT | 334 | 333 |     |     |     |
| CONNECT | 395 | 394 |     |     |     |
| CONNECT | 396 | 397 | 394 |     |     |
| CONNECT | 407 | 406 |     |     |     |
| CONNECT | 451 | 455 | 453 | 452 |     |
| CONNECT | 477 | 480 | 479 | 478 | 474 |
| CONNECT | 483 | 485 | 484 | 481 |     |
| CONNECT | 485 | 488 | 487 | 486 | 483 |
| CONNECT | 488 | 491 | 490 | 489 | 485 |
| CONNECT | 491 | 494 | 493 | 492 | 488 |
| CONNECT | 494 | 497 | 496 | 495 | 491 |
| CONNECT | 497 | 500 | 499 | 498 | 494 |
| CONNECT | 500 | 503 | 502 | 501 | 497 |
| CONNECT | 503 | 506 | 505 | 504 | 500 |
| CONNECT | 506 | 509 | 508 | 507 | 503 |
| CONNECT | 453 | 528 | 454 | 451 |     |
| CONNECT | 509 | 512 | 511 | 510 | 506 |
| CONNECT | 512 | 515 | 514 | 513 | 509 |
| CONNECT | 515 | 518 | 517 | 516 | 512 |
| CONNECT | 518 | 521 | 520 | 519 | 515 |
| CONNECT | 521 | 524 | 523 | 522 | 518 |
| CONNECT | 524 | 527 | 526 | 525 | 521 |
| CONNECT | 530 | 533 | 532 | 531 | 528 |
| CONNECT | 533 | 536 | 535 | 534 | 530 |
| CONNECT | 536 | 539 | 538 | 537 | 533 |
| CONNECT | 539 | 542 | 541 | 540 | 536 |
| CONNECT | 457 | 460 | 459 | 458 | 455 |

|         |     |     |     |     |     |
|---------|-----|-----|-----|-----|-----|
| CONNECT | 542 | 554 | 544 | 543 | 539 |
| CONNECT | 544 | 546 | 545 | 542 |     |
| CONNECT | 547 | 550 | 549 | 548 | 546 |
| CONNECT | 550 | 553 | 552 | 551 | 547 |
| CONNECT | 556 | 558 | 557 | 554 |     |
| CONNECT | 558 | 561 | 560 | 559 | 556 |
| CONNECT | 561 | 564 | 563 | 562 | 558 |
| CONNECT | 564 | 567 | 566 | 565 | 561 |
| CONNECT | 567 | 570 | 569 | 568 | 564 |
| CONNECT | 570 | 573 | 572 | 571 | 567 |
| CONNECT | 460 | 463 | 462 | 461 | 457 |
| CONNECT | 573 | 576 | 575 | 574 | 570 |
| CONNECT | 576 | 579 | 578 | 577 | 573 |
| CONNECT | 579 | 582 | 581 | 580 | 576 |
| CONNECT | 582 | 585 | 584 | 583 | 579 |
| CONNECT | 585 | 588 | 587 | 586 | 582 |
| CONNECT | 588 | 591 | 590 | 589 | 585 |
| CONNECT | 591 | 594 | 593 | 592 | 588 |
| CONNECT | 594 | 597 | 596 | 595 | 591 |
| CONNECT | 597 | 600 | 599 | 598 | 594 |
| CONNECT | 463 | 466 | 465 | 464 | 460 |
| CONNECT | 466 | 469 | 468 | 467 | 463 |
| CONNECT | 469 | 481 | 471 | 470 | 466 |
| CONNECT | 471 | 473 | 472 | 469 |     |
| CONNECT | 474 | 477 | 476 | 475 | 473 |
| CONNECT | 456 | 455 |     |     |     |
| CONNECT | 470 | 469 |     |     |     |
| CONNECT | 475 | 474 |     |     |     |
| CONNECT | 476 | 474 |     |     |     |
| CONNECT | 478 | 477 |     |     |     |
| CONNECT | 479 | 477 |     |     |     |
| CONNECT | 480 | 477 |     |     |     |
| CONNECT | 482 | 481 |     |     |     |
| CONNECT | 486 | 485 |     |     |     |
| CONNECT | 487 | 485 |     |     |     |
| CONNECT | 489 | 488 |     |     |     |
| CONNECT | 458 | 457 |     |     |     |
| CONNECT | 490 | 488 |     |     |     |
| CONNECT | 492 | 491 |     |     |     |
| CONNECT | 493 | 491 |     |     |     |
| CONNECT | 495 | 494 |     |     |     |
| CONNECT | 496 | 494 |     |     |     |
| CONNECT | 498 | 497 |     |     |     |
| CONNECT | 499 | 497 |     |     |     |
| CONNECT | 501 | 500 |     |     |     |
| CONNECT | 502 | 500 |     |     |     |
| CONNECT | 504 | 503 |     |     |     |
| CONNECT | 459 | 457 |     |     |     |
| CONNECT | 505 | 503 |     |     |     |
| CONNECT | 507 | 506 |     |     |     |
| CONNECT | 508 | 506 |     |     |     |
| CONNECT | 510 | 509 |     |     |     |
| CONNECT | 511 | 509 |     |     |     |
| CONNECT | 513 | 512 |     |     |     |
| CONNECT | 514 | 512 |     |     |     |
| CONNECT | 516 | 515 |     |     |     |
| CONNECT | 517 | 515 |     |     |     |

|        |     |     |
|--------|-----|-----|
| CONECT | 519 | 518 |
| CONECT | 461 | 460 |
| CONECT | 520 | 518 |
| CONECT | 522 | 521 |
| CONECT | 523 | 521 |
| CONECT | 525 | 524 |
| CONECT | 526 | 524 |
| CONECT | 527 | 524 |
| CONECT | 529 | 528 |
| CONECT | 531 | 530 |
| CONECT | 532 | 530 |
| CONECT | 534 | 533 |
| CONECT | 462 | 460 |
| CONECT | 535 | 533 |
| CONECT | 537 | 536 |
| CONECT | 538 | 536 |
| CONECT | 540 | 539 |
| CONECT | 541 | 539 |
| CONECT | 543 | 542 |
| CONECT | 548 | 547 |
| CONECT | 549 | 547 |
| CONECT | 551 | 550 |
| CONECT | 552 | 550 |
| CONECT | 464 | 463 |
| CONECT | 553 | 550 |
| CONECT | 555 | 554 |
| CONECT | 559 | 558 |
| CONECT | 560 | 558 |
| CONECT | 562 | 561 |
| CONECT | 563 | 561 |
| CONECT | 565 | 564 |
| CONECT | 566 | 564 |
| CONECT | 568 | 567 |
| CONECT | 569 | 567 |
| CONECT | 465 | 463 |
| CONECT | 571 | 570 |
| CONECT | 572 | 570 |
| CONECT | 574 | 573 |
| CONECT | 575 | 573 |
| CONECT | 577 | 576 |
| CONECT | 578 | 576 |
| CONECT | 580 | 579 |
| CONECT | 581 | 579 |
| CONECT | 583 | 582 |
| CONECT | 584 | 582 |
| CONECT | 467 | 466 |
| CONECT | 586 | 585 |
| CONECT | 587 | 585 |
| CONECT | 589 | 588 |
| CONECT | 590 | 588 |
| CONECT | 592 | 591 |
| CONECT | 593 | 591 |
| CONECT | 595 | 594 |
| CONECT | 596 | 594 |
| CONECT | 598 | 597 |
| CONECT | 599 | 597 |
| CONECT | 468 | 466 |



|         |     |     |     |     |     |
|---------|-----|-----|-----|-----|-----|
| CONNECT | 600 | 597 |     |     |     |
| CONNECT | 455 | 457 | 456 | 451 |     |
| CONNECT | 481 | 483 | 482 | 469 |     |
| CONNECT | 528 | 530 | 529 | 453 |     |
| CONNECT | 554 | 556 | 555 | 542 |     |
| CONNECT | 452 | 451 |     |     |     |
| CONNECT | 454 | 453 |     |     |     |
| CONNECT | 472 | 471 |     |     |     |
| CONNECT | 473 | 474 | 471 |     |     |
| CONNECT | 484 | 483 |     |     |     |
| CONNECT | 545 | 544 |     |     |     |
| CONNECT | 546 | 547 | 544 |     |     |
| CONNECT | 557 | 556 |     |     |     |
| CONNECT | 601 | 605 | 603 | 602 |     |
| CONNECT | 627 | 630 | 629 | 628 | 624 |
| CONNECT | 633 | 635 | 634 | 631 |     |
| CONNECT | 635 | 638 | 637 | 636 | 633 |
| CONNECT | 638 | 641 | 640 | 639 | 635 |
| CONNECT | 641 | 644 | 643 | 642 | 638 |
| CONNECT | 644 | 647 | 646 | 645 | 641 |
| CONNECT | 647 | 650 | 649 | 648 | 644 |
| CONNECT | 650 | 653 | 652 | 651 | 647 |
| CONNECT | 653 | 656 | 655 | 654 | 650 |
| CONNECT | 656 | 659 | 658 | 657 | 653 |
| CONNECT | 603 | 678 | 604 | 601 |     |
| CONNECT | 659 | 662 | 661 | 660 | 656 |
| CONNECT | 662 | 665 | 664 | 663 | 659 |
| CONNECT | 665 | 668 | 667 | 666 | 662 |
| CONNECT | 668 | 671 | 670 | 669 | 665 |
| CONNECT | 671 | 674 | 673 | 672 | 668 |
| CONNECT | 674 | 677 | 676 | 675 | 671 |
| CONNECT | 680 | 683 | 682 | 681 | 678 |
| CONNECT | 683 | 686 | 685 | 684 | 680 |
| CONNECT | 686 | 689 | 688 | 687 | 683 |
| CONNECT | 689 | 692 | 691 | 690 | 686 |
| CONNECT | 607 | 610 | 609 | 608 | 605 |
| CONNECT | 692 | 704 | 694 | 693 | 689 |
| CONNECT | 694 | 696 | 695 | 692 |     |
| CONNECT | 697 | 700 | 699 | 698 | 696 |
| CONNECT | 700 | 703 | 702 | 701 | 697 |
| CONNECT | 706 | 708 | 707 | 704 |     |
| CONNECT | 708 | 711 | 710 | 709 | 706 |
| CONNECT | 711 | 714 | 713 | 712 | 708 |
| CONNECT | 714 | 717 | 716 | 715 | 711 |
| CONNECT | 717 | 720 | 719 | 718 | 714 |
| CONNECT | 720 | 723 | 722 | 721 | 717 |
| CONNECT | 610 | 613 | 612 | 611 | 607 |
| CONNECT | 723 | 726 | 725 | 724 | 720 |
| CONNECT | 726 | 729 | 728 | 727 | 723 |
| CONNECT | 729 | 731 | 732 | 730 | 726 |
| CONNECT | 732 | 733 | 734 | 735 | 729 |
| CONNECT | 735 | 732 | 736 | 737 | 738 |
| CONNECT | 738 | 735 | 739 | 740 | 741 |
| CONNECT | 741 | 744 | 738 | 742 | 743 |
| CONNECT | 744 | 746 | 747 | 745 | 741 |
| CONNECT | 747 | 749 | 750 | 744 | 748 |
| CONNECT | 613 | 616 | 615 | 614 | 610 |

|         |     |     |     |     |     |
|---------|-----|-----|-----|-----|-----|
| CONNECT | 616 | 619 | 618 | 617 | 613 |
| CONNECT | 619 | 631 | 621 | 620 | 616 |
| CONNECT | 621 | 623 | 622 | 619 |     |
| CONNECT | 624 | 627 | 626 | 625 | 623 |
| CONNECT | 606 | 605 |     |     |     |
| CONNECT | 620 | 619 |     |     |     |
| CONNECT | 625 | 624 |     |     |     |
| CONNECT | 626 | 624 |     |     |     |
| CONNECT | 628 | 627 |     |     |     |
| CONNECT | 629 | 627 |     |     |     |
| CONNECT | 630 | 627 |     |     |     |
| CONNECT | 632 | 631 |     |     |     |
| CONNECT | 636 | 635 |     |     |     |
| CONNECT | 637 | 635 |     |     |     |
| CONNECT | 639 | 638 |     |     |     |
| CONNECT | 608 | 607 |     |     |     |
| CONNECT | 640 | 638 |     |     |     |
| CONNECT | 642 | 641 |     |     |     |
| CONNECT | 643 | 641 |     |     |     |
| CONNECT | 645 | 644 |     |     |     |
| CONNECT | 646 | 644 |     |     |     |
| CONNECT | 648 | 647 |     |     |     |
| CONNECT | 649 | 647 |     |     |     |
| CONNECT | 651 | 650 |     |     |     |
| CONNECT | 652 | 650 |     |     |     |
| CONNECT | 654 | 653 |     |     |     |
| CONNECT | 609 | 607 |     |     |     |
| CONNECT | 655 | 653 |     |     |     |
| CONNECT | 657 | 656 |     |     |     |
| CONNECT | 658 | 656 |     |     |     |
| CONNECT | 660 | 659 |     |     |     |
| CONNECT | 661 | 659 |     |     |     |
| CONNECT | 663 | 662 |     |     |     |
| CONNECT | 664 | 662 |     |     |     |
| CONNECT | 666 | 665 |     |     |     |
| CONNECT | 667 | 665 |     |     |     |
| CONNECT | 669 | 668 |     |     |     |
| CONNECT | 611 | 610 |     |     |     |
| CONNECT | 670 | 668 |     |     |     |
| CONNECT | 672 | 671 |     |     |     |
| CONNECT | 673 | 671 |     |     |     |
| CONNECT | 675 | 674 |     |     |     |
| CONNECT | 676 | 674 |     |     |     |
| CONNECT | 677 | 674 |     |     |     |
| CONNECT | 679 | 678 |     |     |     |
| CONNECT | 681 | 680 |     |     |     |
| CONNECT | 682 | 680 |     |     |     |
| CONNECT | 684 | 683 |     |     |     |
| CONNECT | 612 | 610 |     |     |     |
| CONNECT | 685 | 683 |     |     |     |
| CONNECT | 687 | 686 |     |     |     |
| CONNECT | 688 | 686 |     |     |     |
| CONNECT | 690 | 689 |     |     |     |
| CONNECT | 691 | 689 |     |     |     |
| CONNECT | 693 | 692 |     |     |     |
| CONNECT | 698 | 697 |     |     |     |
| CONNECT | 699 | 697 |     |     |     |

|        |     |     |     |         |
|--------|-----|-----|-----|---------|
| CONECT | 701 | 700 |     |         |
| CONECT | 702 | 700 |     |         |
| CONECT | 614 | 613 |     |         |
| CONECT | 703 | 700 |     |         |
| CONECT | 705 | 704 |     |         |
| CONECT | 709 | 708 |     |         |
| CONECT | 710 | 708 |     |         |
| CONECT | 712 | 711 |     |         |
| CONECT | 713 | 711 |     |         |
| CONECT | 715 | 714 |     |         |
| CONECT | 716 | 714 |     |         |
| CONECT | 718 | 717 |     |         |
| CONECT | 719 | 717 |     |         |
| CONECT | 615 | 613 |     |         |
| CONECT | 721 | 720 |     |         |
| CONECT | 722 | 720 |     |         |
| CONECT | 724 | 723 |     |         |
| CONECT | 725 | 723 |     |         |
| CONECT | 727 | 726 |     |         |
| CONECT | 728 | 726 |     |         |
| CONECT | 730 | 729 |     |         |
| CONECT | 731 | 729 |     |         |
| CONECT | 733 | 732 |     |         |
| CONECT | 734 | 732 |     |         |
| CONECT | 617 | 616 |     |         |
| CONECT | 736 | 735 |     |         |
| CONECT | 737 | 735 |     |         |
| CONECT | 739 | 738 |     |         |
| CONECT | 740 | 738 |     |         |
| CONECT | 742 | 741 |     |         |
| CONECT | 743 | 741 |     |         |
| CONECT | 745 | 744 |     |         |
| CONECT | 746 | 744 |     |         |
| CONECT | 748 | 747 |     |         |
| CONECT | 749 | 747 |     |         |
| CONECT | 618 | 616 |     |         |
| CONECT | 750 | 747 |     |         |
| CONECT | 605 | 607 | 606 | 601     |
| CONECT | 631 | 633 | 632 | 619     |
| CONECT | 678 | 680 | 679 | 603     |
| CONECT | 704 | 706 | 705 | 692     |
| CONECT | 602 | 601 |     |         |
| CONECT | 604 | 603 |     |         |
| CONECT | 622 | 621 |     |         |
| CONECT | 623 | 624 | 621 |         |
| CONECT | 634 | 633 |     |         |
| CONECT | 695 | 694 |     |         |
| CONECT | 696 | 697 | 694 |         |
| CONECT | 707 | 706 |     |         |
| CONECT | 751 | 753 | 752 | 755     |
| CONECT | 777 | 779 | 780 | 778 774 |
| CONECT | 783 | 784 | 781 | 785     |
| CONECT | 785 | 786 | 787 | 783 788 |
| CONECT | 788 | 789 | 791 | 785 790 |
| CONECT | 791 | 793 | 794 | 792 788 |
| CONECT | 794 | 795 | 796 | 791 797 |
| CONECT | 797 | 794 | 800 | 799 798 |

|         |     |     |     |     |     |
|---------|-----|-----|-----|-----|-----|
| CONNECT | 800 | 801 | 803 | 797 | 802 |
| CONNECT | 803 | 804 | 806 | 800 | 805 |
| CONNECT | 806 | 808 | 803 | 809 | 807 |
| CONNECT | 753 | 751 | 828 | 754 |     |
| CONNECT | 809 | 806 | 811 | 810 | 812 |
| CONNECT | 812 | 814 | 813 | 809 | 815 |
| CONNECT | 815 | 818 | 817 | 816 | 812 |
| CONNECT | 818 | 820 | 821 | 819 | 815 |
| CONNECT | 821 | 823 | 818 | 824 | 822 |
| CONNECT | 824 | 827 | 826 | 821 | 825 |
| CONNECT | 830 | 831 | 833 | 832 | 828 |
| CONNECT | 833 | 835 | 836 | 830 | 834 |
| CONNECT | 836 | 838 | 833 | 839 | 837 |
| CONNECT | 839 | 841 | 840 | 836 | 842 |
| CONNECT | 757 | 759 | 755 | 758 | 760 |
| CONNECT | 842 | 843 | 854 | 844 | 839 |
| CONNECT | 844 | 845 | 842 | 846 |     |
| CONNECT | 847 | 849 | 848 | 846 | 850 |
| CONNECT | 850 | 852 | 851 | 853 | 847 |
| CONNECT | 856 | 854 | 858 | 857 |     |
| CONNECT | 858 | 860 | 859 | 856 | 861 |
| CONNECT | 861 | 864 | 862 | 863 | 858 |
| CONNECT | 864 | 866 | 867 | 865 | 861 |
| CONNECT | 867 | 870 | 868 | 864 | 869 |
| CONNECT | 870 | 873 | 867 | 871 | 872 |
| CONNECT | 760 | 762 | 757 | 763 | 761 |
| CONNECT | 873 | 876 | 870 | 874 | 875 |
| CONNECT | 876 | 879 | 878 | 873 | 877 |
| CONNECT | 879 | 876 | 881 | 882 | 880 |
| CONNECT | 882 | 879 | 884 | 883 | 885 |
| CONNECT | 885 | 882 | 887 | 886 | 888 |
| CONNECT | 888 | 891 | 890 | 889 | 885 |
| CONNECT | 891 | 894 | 893 | 892 | 888 |
| CONNECT | 894 | 897 | 891 | 895 | 896 |
| CONNECT | 897 | 898 | 899 | 894 | 900 |
| CONNECT | 763 | 766 | 764 | 765 | 760 |
| CONNECT | 766 | 769 | 768 | 763 | 767 |
| CONNECT | 769 | 766 | 781 | 771 | 770 |
| CONNECT | 771 | 769 | 773 | 772 |     |
| CONNECT | 774 | 775 | 776 | 777 | 773 |
| CONNECT | 756 | 755 |     |     |     |
| CONNECT | 770 | 769 |     |     |     |
| CONNECT | 775 | 774 |     |     |     |
| CONNECT | 776 | 774 |     |     |     |
| CONNECT | 778 | 777 |     |     |     |
| CONNECT | 779 | 777 |     |     |     |
| CONNECT | 780 | 777 |     |     |     |
| CONNECT | 782 | 781 |     |     |     |
| CONNECT | 786 | 785 |     |     |     |
| CONNECT | 787 | 785 |     |     |     |
| CONNECT | 789 | 788 |     |     |     |
| CONNECT | 758 | 757 |     |     |     |
| CONNECT | 790 | 788 |     |     |     |
| CONNECT | 792 | 791 |     |     |     |
| CONNECT | 793 | 791 |     |     |     |
| CONNECT | 795 | 794 |     |     |     |
| CONNECT | 796 | 794 |     |     |     |

|         |     |     |
|---------|-----|-----|
| CONNECT | 798 | 797 |
| CONNECT | 799 | 797 |
| CONNECT | 801 | 800 |
| CONNECT | 802 | 800 |
| CONNECT | 804 | 803 |
| CONNECT | 759 | 757 |
| CONNECT | 805 | 803 |
| CONNECT | 807 | 806 |
| CONNECT | 808 | 806 |
| CONNECT | 810 | 809 |
| CONNECT | 811 | 809 |
| CONNECT | 813 | 812 |
| CONNECT | 814 | 812 |
| CONNECT | 816 | 815 |
| CONNECT | 817 | 815 |
| CONNECT | 819 | 818 |
| CONNECT | 761 | 760 |
| CONNECT | 820 | 818 |
| CONNECT | 822 | 821 |
| CONNECT | 823 | 821 |
| CONNECT | 825 | 824 |
| CONNECT | 826 | 824 |
| CONNECT | 827 | 824 |
| CONNECT | 829 | 828 |
| CONNECT | 831 | 830 |
| CONNECT | 832 | 830 |
| CONNECT | 834 | 833 |
| CONNECT | 762 | 760 |
| CONNECT | 835 | 833 |
| CONNECT | 837 | 836 |
| CONNECT | 838 | 836 |
| CONNECT | 840 | 839 |
| CONNECT | 841 | 839 |
| CONNECT | 843 | 842 |
| CONNECT | 848 | 847 |
| CONNECT | 849 | 847 |
| CONNECT | 851 | 850 |
| CONNECT | 852 | 850 |
| CONNECT | 764 | 763 |
| CONNECT | 853 | 850 |
| CONNECT | 855 | 854 |
| CONNECT | 859 | 858 |
| CONNECT | 860 | 858 |
| CONNECT | 862 | 861 |
| CONNECT | 863 | 861 |
| CONNECT | 865 | 864 |
| CONNECT | 866 | 864 |
| CONNECT | 868 | 867 |
| CONNECT | 869 | 867 |
| CONNECT | 765 | 763 |
| CONNECT | 871 | 870 |
| CONNECT | 872 | 870 |
| CONNECT | 874 | 873 |
| CONNECT | 875 | 873 |
| CONNECT | 877 | 876 |
| CONNECT | 878 | 876 |
| CONNECT | 880 | 879 |

|        |      |      |      |      |      |
|--------|------|------|------|------|------|
| CONECT | 881  | 879  |      |      |      |
| CONECT | 883  | 882  |      |      |      |
| CONECT | 884  | 882  |      |      |      |
| CONECT | 767  | 766  |      |      |      |
| CONECT | 886  | 885  |      |      |      |
| CONECT | 887  | 885  |      |      |      |
| CONECT | 889  | 888  |      |      |      |
| CONECT | 890  | 888  |      |      |      |
| CONECT | 892  | 891  |      |      |      |
| CONECT | 893  | 891  |      |      |      |
| CONECT | 895  | 894  |      |      |      |
| CONECT | 896  | 894  |      |      |      |
| CONECT | 898  | 897  |      |      |      |
| CONECT | 899  | 897  |      |      |      |
| CONECT | 768  | 766  |      |      |      |
| CONECT | 900  | 897  |      |      |      |
| CONECT | 755  | 751  | 757  | 756  |      |
| CONECT | 781  | 769  | 782  | 783  |      |
| CONECT | 828  | 753  | 829  | 830  |      |
| CONECT | 854  | 842  | 855  | 856  |      |
| CONECT | 752  | 751  |      |      |      |
| CONECT | 754  | 753  |      |      |      |
| CONECT | 772  | 771  |      |      |      |
| CONECT | 773  | 774  | 771  |      |      |
| CONECT | 784  | 783  |      |      |      |
| CONECT | 845  | 844  |      |      |      |
| CONECT | 846  | 844  | 847  |      |      |
| CONECT | 857  | 856  |      |      |      |
| CONECT | 901  | 903  | 905  | 902  |      |
| CONECT | 927  | 930  | 929  | 928  | 924  |
| CONECT | 933  | 935  | 934  | 931  |      |
| CONECT | 935  | 938  | 937  | 936  | 933  |
| CONECT | 938  | 935  | 940  | 941  | 939  |
| CONECT | 941  | 938  | 944  | 942  | 943  |
| CONECT | 944  | 941  | 945  | 947  | 946  |
| CONECT | 947  | 944  | 948  | 950  | 949  |
| CONECT | 950  | 951  | 952  | 953  | 947  |
| CONECT | 953  | 954  | 955  | 956  | 950  |
| CONECT | 956  | 953  | 957  | 959  | 958  |
| CONECT | 903  | 904  | 978  | 901  |      |
| CONECT | 959  | 961  | 956  | 960  | 962  |
| CONECT | 962  | 963  | 965  | 964  | 959  |
| CONECT | 965  | 967  | 968  | 966  | 962  |
| CONECT | 968  | 969  | 965  | 971  | 970  |
| CONECT | 971  | 968  | 973  | 974  | 972  |
| CONECT | 974  | 977  | 976  | 975  | 971  |
| CONECT | 980  | 983  | 982  | 981  | 978  |
| CONECT | 983  | 986  | 985  | 984  | 980  |
| CONECT | 986  | 989  | 988  | 987  | 983  |
| CONECT | 989  | 992  | 991  | 990  | 986  |
| CONECT | 907  | 905  | 909  | 908  | 910  |
| CONECT | 992  | 1004 | 994  | 993  | 989  |
| CONECT | 994  | 996  | 995  | 992  |      |
| CONECT | 997  | 1000 | 999  | 998  | 996  |
| CONECT | 1000 | 1003 | 1002 | 1001 | 997  |
| CONECT | 1006 | 1008 | 1007 | 1004 |      |
| CONECT | 1008 | 1011 | 1010 | 1009 | 1006 |

CONNECT 1011 1014 1013 1012 1008  
CONNECT 1014 1017 1016 1015 1011  
CONNECT 1017 1020 1019 1018 1014  
CONNECT 1020 1023 1022 1021 1017  
CONNECT 910 912 913 907 911  
CONNECT 1023 1026 1025 1024 1020  
CONNECT 1026 1029 1028 1027 1023  
CONNECT 1029 1032 1031 1030 1026  
CONNECT 1032 1035 1034 1033 1029  
CONNECT 1035 1038 1037 1036 1032  
CONNECT 1038 1041 1040 1039 1035  
CONNECT 1041 1044 1043 1042 1038  
CONNECT 1044 1047 1046 1045 1041  
CONNECT 1047 1050 1049 1048 1044  
CONNECT 913 916 915 910 914  
CONNECT 916 919 913 918 917  
CONNECT 919 931 921 916 920  
CONNECT 921 919 923 922  
CONNECT 924 927 925 926 923  
CONNECT 906 905  
CONNECT 920 919  
CONNECT 925 924  
CONNECT 926 924  
CONNECT 928 927  
CONNECT 929 927  
CONNECT 930 927  
CONNECT 932 931  
CONNECT 936 935  
CONNECT 937 935  
CONNECT 939 938  
CONNECT 908 907  
CONNECT 940 938  
CONNECT 942 941  
CONNECT 943 941  
CONNECT 945 944  
CONNECT 946 944  
CONNECT 948 947  
CONNECT 949 947  
CONNECT 951 950  
CONNECT 952 950  
CONNECT 954 953  
CONNECT 909 907  
CONNECT 955 953  
CONNECT 957 956  
CONNECT 958 956  
CONNECT 960 959  
CONNECT 961 959  
CONNECT 963 962  
CONNECT 964 962  
CONNECT 966 965  
CONNECT 967 965  
CONNECT 969 968  
CONNECT 911 910  
CONNECT 970 968  
CONNECT 972 971  
CONNECT 973 971  
CONNECT 975 974

CONECT 976 974  
 CONECT 977 974  
 CONECT 979 978  
 CONECT 981 980  
 CONECT 982 980  
 CONECT 984 983  
 CONECT 912 910  
 CONECT 985 983  
 CONECT 987 986  
 CONECT 988 986  
 CONECT 990 989  
 CONECT 991 989  
 CONECT 993 992  
 CONECT 998 997  
 CONECT 999 997  
 CONECT 1001 1000  
 CONECT 1002 1000  
 CONECT 914 913  
 CONECT 1003 1000  
 CONECT 1005 1004  
 CONECT 1009 1008  
 CONECT 1010 1008  
 CONECT 1012 1011  
 CONECT 1013 1011  
 CONECT 1015 1014  
 CONECT 1016 1014  
 CONECT 1018 1017  
 CONECT 1019 1017  
 CONECT 915 913  
 CONECT 1021 1020  
 CONECT 1022 1020  
 CONECT 1024 1023  
 CONECT 1025 1023  
 CONECT 1027 1026  
 CONECT 1028 1026  
 CONECT 1030 1029  
 CONECT 1031 1029  
 CONECT 1033 1032  
 CONECT 1034 1032  
 CONECT 917 916  
 CONECT 1036 1035  
 CONECT 1037 1035  
 CONECT 1039 1038  
 CONECT 1040 1038  
 CONECT 1042 1041  
 CONECT 1043 1041  
 CONECT 1045 1044  
 CONECT 1046 1044  
 CONECT 1048 1047  
 CONECT 1049 1047  
 CONECT 918 916  
 CONECT 1050 1047  
 CONECT 905 906 907 901  
 CONECT 931 919 933 932  
 CONECT 978 903 980 979  
 CONECT 1004 1006 1005 992  
 CONECT 902 901



CONECT 904 903  
 CONECT 922 921  
 CONECT 923 921 924  
 CONECT 934 933  
 CONECT 995 994  
 CONECT 996 997 994  
 CONECT 1007 1006  
 CONECT 1051 1055 1053 1052  
 CONECT 1077 1080 1079 1078 1074  
 CONECT 1083 1085 1084 1081  
 CONECT 1085 1088 1087 1086 1083  
 CONECT 1088 1091 1090 1089 1085  
 CONECT 1091 1094 1093 1092 1088  
 CONECT 1094 1097 1096 1095 1091  
 CONECT 1097 1100 1099 1098 1094  
 CONECT 1100 1103 1102 1101 1097  
 CONECT 1103 1106 1105 1104 1100  
 CONECT 1106 1109 1108 1107 1103  
 CONECT 1053 1128 1054 1051  
 CONECT 1109 1112 1111 1110 1106  
 CONECT 1112 1115 1114 1113 1109  
 CONECT 1115 1118 1117 1116 1112  
 CONECT 1118 1121 1120 1119 1115  
 CONECT 1121 1124 1123 1122 1118  
 CONECT 1124 1127 1126 1125 1121  
 CONECT 1130 1133 1132 1131 1128  
 CONECT 1133 1136 1135 1134 1130  
 CONECT 1136 1139 1138 1137 1133  
 CONECT 1139 1142 1141 1140 1136  
 CONECT 1057 1060 1059 1058 1055  
 CONECT 1142 1154 1144 1143 1139  
 CONECT 1144 1146 1145 1142  
 CONECT 1147 1150 1149 1148 1146  
 CONECT 1150 1153 1152 1151 1147  
 CONECT 1156 1158 1157 1154  
 CONECT 1158 1161 1160 1159 1156  
 CONECT 1161 1164 1163 1162 1158  
 CONECT 1164 1167 1166 1165 1161  
 CONECT 1167 1170 1169 1168 1164  
 CONECT 1170 1173 1172 1171 1167  
 CONECT 1060 1063 1062 1061 1057  
 CONECT 1173 1176 1175 1174 1170  
 CONECT 1176 1179 1178 1177 1173  
 CONECT 1179 1182 1181 1180 1176  
 CONECT 1182 1185 1184 1183 1179  
 CONECT 1185 1188 1187 1186 1182  
 CONECT 1188 1191 1190 1189 1185  
 CONECT 1191 1194 1193 1192 1188  
 CONECT 1194 1197 1196 1195 1191  
 CONECT 1197 1200 1199 1198 1194  
 CONECT 1063 1066 1065 1064 1060  
 CONECT 1066 1069 1068 1067 1063  
 CONECT 1069 1081 1071 1070 1066  
 CONECT 1071 1073 1072 1069  
 CONECT 1074 1077 1076 1075 1073  
 CONECT 1056 1055  
 CONECT 1070 1069

CONNECT 1075 1074  
CONNECT 1076 1074  
CONNECT 1078 1077  
CONNECT 1079 1077  
CONNECT 1080 1077  
CONNECT 1082 1081  
CONNECT 1086 1085  
CONNECT 1087 1085  
CONNECT 1089 1088  
CONNECT 1058 1057  
CONNECT 1090 1088  
CONNECT 1092 1091  
CONNECT 1093 1091  
CONNECT 1095 1094  
CONNECT 1096 1094  
CONNECT 1098 1097  
CONNECT 1099 1097  
CONNECT 1101 1100  
CONNECT 1102 1100  
CONNECT 1104 1103  
CONNECT 1059 1057  
CONNECT 1105 1103  
CONNECT 1107 1106  
CONNECT 1108 1106  
CONNECT 1110 1109  
CONNECT 1111 1109  
CONNECT 1113 1112  
CONNECT 1114 1112  
CONNECT 1116 1115  
CONNECT 1117 1115  
CONNECT 1119 1118  
CONNECT 1061 1060  
CONNECT 1120 1118  
CONNECT 1122 1121  
CONNECT 1123 1121  
CONNECT 1125 1124  
CONNECT 1126 1124  
CONNECT 1127 1124  
CONNECT 1129 1128  
CONNECT 1131 1130  
CONNECT 1132 1130  
CONNECT 1134 1133  
CONNECT 1062 1060  
CONNECT 1135 1133  
CONNECT 1137 1136  
CONNECT 1138 1136  
CONNECT 1140 1139  
CONNECT 1141 1139  
CONNECT 1143 1142  
CONNECT 1148 1147  
CONNECT 1149 1147  
CONNECT 1151 1150  
CONNECT 1152 1150  
CONNECT 1064 1063  
CONNECT 1153 1150  
CONNECT 1155 1154  
CONNECT 1159 1158

CONNECT 1160 1158  
CONNECT 1162 1161  
CONNECT 1163 1161  
CONNECT 1165 1164  
CONNECT 1166 1164  
CONNECT 1168 1167  
CONNECT 1169 1167  
CONNECT 1065 1063  
CONNECT 1171 1170  
CONNECT 1172 1170  
CONNECT 1174 1173  
CONNECT 1175 1173  
CONNECT 1177 1176  
CONNECT 1178 1176  
CONNECT 1180 1179  
CONNECT 1181 1179  
CONNECT 1183 1182  
CONNECT 1184 1182  
CONNECT 1067 1066  
CONNECT 1186 1185  
CONNECT 1187 1185  
CONNECT 1189 1188  
CONNECT 1190 1188  
CONNECT 1192 1191  
CONNECT 1193 1191  
CONNECT 1195 1194  
CONNECT 1196 1194  
CONNECT 1198 1197  
CONNECT 1199 1197  
CONNECT 1068 1066  
CONNECT 1200 1197  
CONNECT 1055 1057 1056 1051  
CONNECT 1081 1083 1082 1069  
CONNECT 1128 1130 1129 1053  
CONNECT 1154 1156 1155 1142  
CONNECT 1052 1051  
CONNECT 1054 1053  
CONNECT 1072 1071  
CONNECT 1073 1074 1071  
CONNECT 1084 1083  
CONNECT 1145 1144  
CONNECT 1146 1147 1144  
CONNECT 1157 1156  
CONNECT 1203 1206 1205 1204 1201  
CONNECT 1206 1210 1208 1207 1203  
CONNECT 1210 1213 1212 1211 1206  
CONNECT 1202 1201  
CONNECT 1204 1203  
CONNECT 1205 1203  
CONNECT 1207 1206  
CONNECT 1209 1208  
CONNECT 1211 1210  
CONNECT 1212 1210  
CONNECT 1213 1210  
CONNECT 1201 1203 1202  
CONNECT 1208 1209 1206  
CONNECT 1216 1219 1218 1217 1214

CONNECT 1219 1223 1221 1220 1216  
CONNECT 1223 1226 1225 1224 1219  
CONNECT 1215 1214  
CONNECT 1217 1216  
CONNECT 1218 1216  
CONNECT 1220 1219  
CONNECT 1222 1221  
CONNECT 1224 1223  
CONNECT 1225 1223  
CONNECT 1226 1223  
CONNECT 1214 1216 1215  
CONNECT 1221 1222 1219  
CONNECT 1229 1232 1231 1230 1227  
CONNECT 1232 1236 1234 1233 1229  
CONNECT 1236 1239 1238 1237 1232  
CONNECT 1228 1227  
CONNECT 1230 1229  
CONNECT 1231 1229  
CONNECT 1233 1232  
CONNECT 1235 1234  
CONNECT 1237 1236  
CONNECT 1238 1236  
CONNECT 1239 1236  
CONNECT 1227 1229 1228  
CONNECT 1234 1235 1232  
CONNECT 1242 1245 1244 1243 1240  
CONNECT 1245 1249 1247 1246 1242  
CONNECT 1249 1252 1251 1250 1245  
CONNECT 1241 1240  
CONNECT 1243 1242  
CONNECT 1244 1242  
CONNECT 1246 1245  
CONNECT 1248 1247  
CONNECT 1250 1249  
CONNECT 1251 1249  
CONNECT 1252 1249  
CONNECT 1240 1242 1241  
CONNECT 1247 1248 1245  
CONNECT 1255 1258 1257 1256 1253  
CONNECT 1258 1262 1260 1259 1255  
CONNECT 1262 1265 1264 1263 1258  
CONNECT 1254 1253  
CONNECT 1256 1255  
CONNECT 1257 1255  
CONNECT 1259 1258  
CONNECT 1261 1260  
CONNECT 1263 1262  
CONNECT 1264 1262  
CONNECT 1265 1262  
CONNECT 1253 1255 1254  
CONNECT 1260 1261 1258  
CONNECT 1268 1271 1270 1269 1266  
CONNECT 1271 1275 1273 1272 1268  
CONNECT 1275 1278 1277 1276 1271  
CONNECT 1267 1266  
CONNECT 1269 1268  
CONNECT 1270 1268

CONECT 1272 1271  
CONECT 1274 1273  
CONECT 1276 1275  
CONECT 1277 1275  
CONECT 1278 1275  
CONECT 1266 1268 1267  
CONECT 1273 1274 1271  
CONECT 1281 1284 1283 1282 1279  
CONECT 1284 1288 1286 1285 1281  
CONECT 1288 1291 1290 1289 1284  
CONECT 1280 1279  
CONECT 1282 1281  
CONECT 1283 1281  
CONECT 1285 1284  
CONECT 1287 1286  
CONECT 1289 1288  
CONECT 1290 1288  
CONECT 1291 1288  
CONECT 1279 1281 1280  
CONECT 1286 1287 1284  
CONECT 1294 1297 1296 1295 1292  
CONECT 1297 1301 1299 1298 1294  
CONECT 1301 1304 1303 1302 1297  
CONECT 1293 1292  
CONECT 1295 1294  
CONECT 1296 1294  
CONECT 1298 1297  
CONECT 1300 1299  
CONECT 1302 1301  
CONECT 1303 1301  
CONECT 1304 1301  
CONECT 1292 1294 1293  
CONECT 1299 1300 1297  
CONECT 1307 1310 1309 1308 1305  
CONECT 1310 1314 1312 1311 1307  
CONECT 1314 1317 1316 1315 1310  
CONECT 1306 1305  
CONECT 1308 1307  
CONECT 1309 1307  
CONECT 1311 1310  
CONECT 1313 1312  
CONECT 1315 1314  
CONECT 1316 1314  
CONECT 1317 1314  
CONECT 1305 1307 1306  
CONECT 1312 1313 1310  
CONECT 1320 1323 1322 1321 1318  
CONECT 1323 1327 1325 1324 1320  
CONECT 1327 1330 1329 1328 1323  
CONECT 1319 1318  
CONECT 1321 1320  
CONECT 1322 1320  
CONECT 1324 1323  
CONECT 1326 1325  
CONECT 1328 1327  
CONECT 1329 1327  
CONECT 1330 1327

CONNECT 1318 1320 1319  
CONNECT 1325 1326 1323  
CONNECT 1333 1336 1335 1334 1331  
CONNECT 1336 1340 1338 1337 1333  
CONNECT 1340 1343 1342 1341 1336  
CONNECT 1332 1331  
CONNECT 1334 1333  
CONNECT 1335 1333  
CONNECT 1337 1336  
CONNECT 1339 1338  
CONNECT 1341 1340  
CONNECT 1342 1340  
CONNECT 1343 1340  
CONNECT 1331 1333 1332  
CONNECT 1338 1339 1336  
CONNECT 1346 1349 1348 1347 1344  
CONNECT 1349 1353 1351 1350 1346  
CONNECT 1353 1356 1355 1354 1349  
CONNECT 1345 1344  
CONNECT 1347 1346  
CONNECT 1348 1346  
CONNECT 1350 1349  
CONNECT 1352 1351  
CONNECT 1354 1353  
CONNECT 1355 1353  
CONNECT 1356 1353  
CONNECT 1344 1346 1345  
CONNECT 1351 1352 1349  
CONNECT 1359 1362 1361 1360 1357  
CONNECT 1362 1366 1364 1363 1359  
CONNECT 1366 1369 1368 1367 1362  
CONNECT 1358 1357  
CONNECT 1360 1359  
CONNECT 1361 1359  
CONNECT 1363 1362  
CONNECT 1365 1364  
CONNECT 1367 1366  
CONNECT 1368 1366  
CONNECT 1369 1366  
CONNECT 1357 1359 1358  
CONNECT 1364 1365 1362  
CONNECT 1372 1375 1374 1373 1370  
CONNECT 1375 1379 1377 1376 1372  
CONNECT 1379 1382 1381 1380 1375  
CONNECT 1371 1370  
CONNECT 1373 1372  
CONNECT 1374 1372  
CONNECT 1376 1375  
CONNECT 1378 1377  
CONNECT 1380 1379  
CONNECT 1381 1379  
CONNECT 1382 1379  
CONNECT 1370 1372 1371  
CONNECT 1377 1378 1375  
CONNECT 1385 1388 1387 1386 1383  
CONNECT 1388 1392 1390 1389 1385  
CONNECT 1392 1395 1394 1393 1388

CONNECT 1384 1383  
CONNECT 1386 1385  
CONNECT 1387 1385  
CONNECT 1389 1388  
CONNECT 1391 1390  
CONNECT 1393 1392  
CONNECT 1394 1392  
CONNECT 1395 1392  
CONNECT 1383 1385 1384  
CONNECT 1390 1391 1388  
CONNECT 1398 1401 1400 1399 1396  
CONNECT 1401 1405 1403 1402 1398  
CONNECT 1405 1408 1407 1406 1401  
CONNECT 1397 1396  
CONNECT 1399 1398  
CONNECT 1400 1398  
CONNECT 1402 1401  
CONNECT 1404 1403  
CONNECT 1406 1405  
CONNECT 1407 1405  
CONNECT 1408 1405  
CONNECT 1396 1398 1397  
CONNECT 1403 1404 1401  
CONNECT 1411 1414 1413 1412 1409  
CONNECT 1414 1418 1416 1415 1411  
CONNECT 1418 1421 1420 1419 1414  
CONNECT 1410 1409  
CONNECT 1412 1411  
CONNECT 1413 1411  
CONNECT 1415 1414  
CONNECT 1417 1416  
CONNECT 1419 1418  
CONNECT 1420 1418  
CONNECT 1421 1418  
CONNECT 1409 1411 1410  
CONNECT 1416 1417 1414  
CONNECT 1424 1427 1426 1425 1422  
CONNECT 1427 1431 1429 1428 1424  
CONNECT 1431 1434 1433 1432 1427  
CONNECT 1423 1422  
CONNECT 1425 1424  
CONNECT 1426 1424  
CONNECT 1428 1427  
CONNECT 1430 1429  
CONNECT 1432 1431  
CONNECT 1433 1431  
CONNECT 1434 1431  
CONNECT 1422 1424 1423  
CONNECT 1429 1430 1427  
CONNECT 1437 1440 1439 1438 1435  
CONNECT 1440 1444 1442 1441 1437  
CONNECT 1444 1447 1446 1445 1440  
CONNECT 1436 1435  
CONNECT 1438 1437  
CONNECT 1439 1437  
CONNECT 1441 1440  
CONNECT 1443 1442

CONNECT 1445 1444  
CONNECT 1446 1444  
CONNECT 1447 1444  
CONNECT 1435 1437 1436  
CONNECT 1442 1443 1440  
CONNECT 1450 1453 1452 1451 1448  
CONNECT 1453 1457 1455 1454 1450  
CONNECT 1457 1460 1459 1458 1453  
CONNECT 1449 1448  
CONNECT 1451 1450  
CONNECT 1452 1450  
CONNECT 1454 1453  
CONNECT 1456 1455  
CONNECT 1458 1457  
CONNECT 1459 1457  
CONNECT 1460 1457  
CONNECT 1448 1450 1449  
CONNECT 1455 1456 1453  
CONNECT 1463 1466 1465 1464 1461  
CONNECT 1466 1470 1468 1467 1463  
CONNECT 1470 1473 1472 1471 1466  
CONNECT 1462 1461  
CONNECT 1464 1463  
CONNECT 1465 1463  
CONNECT 1467 1466  
CONNECT 1469 1468  
CONNECT 1471 1470  
CONNECT 1472 1470  
CONNECT 1473 1470  
CONNECT 1461 1463 1462  
CONNECT 1468 1469 1466  
CONNECT 1476 1479 1478 1477 1474  
CONNECT 1479 1483 1481 1480 1476  
CONNECT 1483 1486 1485 1484 1479  
CONNECT 1475 1474  
CONNECT 1477 1476  
CONNECT 1478 1476  
CONNECT 1480 1479  
CONNECT 1482 1481  
CONNECT 1484 1483  
CONNECT 1485 1483  
CONNECT 1486 1483  
CONNECT 1474 1476 1475  
CONNECT 1481 1482 1479  
CONNECT 1489 1492 1491 1490 1487  
CONNECT 1492 1496 1494 1493 1489  
CONNECT 1496 1499 1498 1497 1492  
CONNECT 1488 1487  
CONNECT 1490 1489  
CONNECT 1491 1489  
CONNECT 1493 1492  
CONNECT 1495 1494  
CONNECT 1497 1496  
CONNECT 1498 1496  
CONNECT 1499 1496  
CONNECT 1487 1489 1488  
CONNECT 1494 1495 1492



CONNECT 1502 1505 1504 1503 1500  
CONNECT 1505 1509 1507 1506 1502  
CONNECT 1509 1512 1511 1510 1505  
CONNECT 1501 1500  
CONNECT 1503 1502  
CONNECT 1504 1502  
CONNECT 1506 1505  
CONNECT 1508 1507  
CONNECT 1510 1509  
CONNECT 1511 1509  
CONNECT 1512 1509  
CONNECT 1500 1502 1501  
CONNECT 1507 1508 1505  
CONNECT 1515 1518 1517 1516 1513  
CONNECT 1518 1522 1520 1519 1515  
CONNECT 1522 1525 1524 1523 1518  
CONNECT 1514 1513  
CONNECT 1516 1515  
CONNECT 1517 1515  
CONNECT 1519 1518  
CONNECT 1521 1520  
CONNECT 1523 1522  
CONNECT 1524 1522  
CONNECT 1525 1522  
CONNECT 1513 1515 1514  
CONNECT 1520 1521 1518  
CONNECT 1528 1531 1530 1529 1526  
CONNECT 1531 1535 1533 1532 1528  
CONNECT 1535 1538 1537 1536 1531  
CONNECT 1527 1526  
CONNECT 1529 1528  
CONNECT 1530 1528  
CONNECT 1532 1531  
CONNECT 1534 1533  
CONNECT 1536 1535  
CONNECT 1537 1535  
CONNECT 1538 1535  
CONNECT 1526 1528 1527  
CONNECT 1533 1534 1531  
CONNECT 1541 1544 1543 1542 1539  
CONNECT 1544 1548 1546 1545 1541  
CONNECT 1548 1551 1550 1549 1544  
CONNECT 1540 1539  
CONNECT 1542 1541  
CONNECT 1543 1541  
CONNECT 1545 1544  
CONNECT 1547 1546  
CONNECT 1549 1548  
CONNECT 1550 1548  
CONNECT 1551 1548  
CONNECT 1539 1541 1540  
CONNECT 1546 1547 1544  
CONNECT 1554 1557 1556 1555 1552  
CONNECT 1557 1561 1559 1558 1554  
CONNECT 1561 1564 1563 1562 1557  
CONNECT 1553 1552  
CONNECT 1555 1554

CONNECT 1556 1554  
CONNECT 1558 1557  
CONNECT 1560 1559  
CONNECT 1562 1561  
CONNECT 1563 1561  
CONNECT 1564 1561  
CONNECT 1552 1554 1553  
CONNECT 1559 1560 1557  
CONNECT 1567 1570 1569 1568 1565  
CONNECT 1570 1574 1572 1571 1567  
CONNECT 1574 1577 1576 1575 1570  
CONNECT 1566 1565  
CONNECT 1568 1567  
CONNECT 1569 1567  
CONNECT 1571 1570  
CONNECT 1573 1572  
CONNECT 1575 1574  
CONNECT 1576 1574  
CONNECT 1577 1574  
CONNECT 1565 1567 1566  
CONNECT 1572 1573 1570  
CONNECT 1580 1583 1582 1581 1578  
CONNECT 1583 1587 1585 1584 1580  
CONNECT 1587 1590 1589 1588 1583  
CONNECT 1579 1578  
CONNECT 1581 1580  
CONNECT 1582 1580  
CONNECT 1584 1583  
CONNECT 1586 1585  
CONNECT 1588 1587  
CONNECT 1589 1587  
CONNECT 1590 1587  
CONNECT 1578 1580 1579  
CONNECT 1585 1586 1583  
CONNECT 1593 1596 1595 1594 1591  
CONNECT 1596 1600 1598 1597 1593  
CONNECT 1600 1603 1602 1601 1596  
CONNECT 1592 1591  
CONNECT 1594 1593  
CONNECT 1595 1593  
CONNECT 1597 1596  
CONNECT 1599 1598  
CONNECT 1601 1600  
CONNECT 1602 1600  
CONNECT 1603 1600  
CONNECT 1591 1593 1592  
CONNECT 1598 1599 1596  
CONNECT 1606 1609 1608 1607 1604  
CONNECT 1609 1613 1611 1610 1606  
CONNECT 1613 1616 1615 1614 1609  
CONNECT 1605 1604  
CONNECT 1607 1606  
CONNECT 1608 1606  
CONNECT 1610 1609  
CONNECT 1612 1611  
CONNECT 1614 1613  
CONNECT 1615 1613

CONECT 1616 1613  
CONECT 1604 1606 1605  
CONECT 1611 1612 1609  
CONECT 1619 1622 1621 1620 1617  
CONECT 1622 1626 1624 1623 1619  
CONECT 1626 1629 1628 1627 1622  
CONECT 1618 1617  
CONECT 1620 1619  
CONECT 1621 1619  
CONECT 1623 1622  
CONECT 1625 1624  
CONECT 1627 1626  
CONECT 1628 1626  
CONECT 1629 1626  
CONECT 1617 1619 1618  
CONECT 1624 1625 1622  
CONECT 1632 1635 1634 1633 1630  
CONECT 1635 1639 1637 1636 1632  
CONECT 1639 1642 1641 1640 1635  
CONECT 1631 1630  
CONECT 1633 1632  
CONECT 1634 1632  
CONECT 1636 1635  
CONECT 1638 1637  
CONECT 1640 1639  
CONECT 1641 1639  
CONECT 1642 1639  
CONECT 1630 1632 1631  
CONECT 1637 1638 1635  
CONECT 1645 1648 1647 1646 1643  
CONECT 1648 1652 1650 1649 1645  
CONECT 1652 1655 1654 1653 1648  
CONECT 1644 1643  
CONECT 1646 1645  
CONECT 1647 1645  
CONECT 1649 1648  
CONECT 1651 1650  
CONECT 1653 1652  
CONECT 1654 1652  
CONECT 1655 1652  
CONECT 1643 1645 1644  
CONECT 1650 1651 1648  
CONECT 1658 1661 1660 1659 1656  
CONECT 1661 1665 1663 1662 1658  
CONECT 1665 1668 1667 1666 1661  
CONECT 1657 1656  
CONECT 1659 1658  
CONECT 1660 1658  
CONECT 1662 1661  
CONECT 1664 1663  
CONECT 1666 1665  
CONECT 1667 1665  
CONECT 1668 1665  
CONECT 1656 1658 1657  
CONECT 1663 1664 1661  
CONECT 1671 1674 1673 1672 1669  
CONECT 1674 1678 1676 1675 1671

CONECT 1678 1681 1680 1679 1674  
CONECT 1670 1669  
CONECT 1672 1671  
CONECT 1673 1671  
CONECT 1675 1674  
CONECT 1677 1676  
CONECT 1679 1678  
CONECT 1680 1678  
CONECT 1681 1678  
CONECT 1669 1671 1670  
CONECT 1676 1677 1674  
CONECT 1684 1687 1686 1685 1682  
CONECT 1687 1691 1689 1688 1684  
CONECT 1691 1694 1693 1692 1687  
CONECT 1683 1682  
CONECT 1685 1684  
CONECT 1686 1684  
CONECT 1688 1687  
CONECT 1690 1689  
CONECT 1692 1691  
CONECT 1693 1691  
CONECT 1694 1691  
CONECT 1682 1684 1683  
CONECT 1689 1690 1687  
CONECT 1697 1700 1699 1698 1695  
CONECT 1700 1704 1702 1701 1697  
CONECT 1704 1707 1706 1705 1700  
CONECT 1696 1695  
CONECT 1698 1697  
CONECT 1699 1697  
CONECT 1701 1700  
CONECT 1703 1702  
CONECT 1705 1704  
CONECT 1706 1704  
CONECT 1707 1704  
CONECT 1695 1697 1696  
CONECT 1702 1703 1700  
CONECT 1710 1713 1712 1711 1708  
CONECT 1713 1717 1715 1714 1710  
CONECT 1717 1720 1719 1718 1713  
CONECT 1709 1708  
CONECT 1711 1710  
CONECT 1712 1710  
CONECT 1714 1713  
CONECT 1716 1715  
CONECT 1718 1717  
CONECT 1719 1717  
CONECT 1720 1717  
CONECT 1708 1710 1709  
CONECT 1715 1716 1713  
CONECT 1723 1726 1725 1724 1721  
CONECT 1726 1730 1728 1727 1723  
CONECT 1730 1733 1732 1731 1726  
CONECT 1722 1721  
CONECT 1724 1723  
CONECT 1725 1723  
CONECT 1727 1726

CONNECT 1729 1728  
CONNECT 1731 1730  
CONNECT 1732 1730  
CONNECT 1733 1730  
CONNECT 1721 1723 1722  
CONNECT 1728 1729 1726  
CONNECT 1736 1739 1738 1737 1734  
CONNECT 1739 1743 1741 1740 1736  
CONNECT 1743 1746 1745 1744 1739  
CONNECT 1735 1734  
CONNECT 1737 1736  
CONNECT 1738 1736  
CONNECT 1740 1739  
CONNECT 1742 1741  
CONNECT 1744 1743  
CONNECT 1745 1743  
CONNECT 1746 1743  
CONNECT 1734 1736 1735  
CONNECT 1741 1742 1739  
CONNECT 1749 1752 1751 1750 1747  
CONNECT 1752 1756 1754 1753 1749  
CONNECT 1756 1759 1758 1757 1752  
CONNECT 1748 1747  
CONNECT 1750 1749  
CONNECT 1751 1749  
CONNECT 1753 1752  
CONNECT 1755 1754  
CONNECT 1757 1756  
CONNECT 1758 1756  
CONNECT 1759 1756  
CONNECT 1747 1749 1748  
CONNECT 1754 1755 1752  
CONNECT 1762 1765 1764 1763 1760  
CONNECT 1765 1769 1767 1766 1762  
CONNECT 1769 1772 1771 1770 1765  
CONNECT 1761 1760  
CONNECT 1763 1762  
CONNECT 1764 1762  
CONNECT 1766 1765  
CONNECT 1768 1767  
CONNECT 1770 1769  
CONNECT 1771 1769  
CONNECT 1772 1769  
CONNECT 1760 1762 1761  
CONNECT 1767 1768 1765  
CONNECT 1775 1778 1777 1776 1773  
CONNECT 1778 1782 1780 1779 1775  
CONNECT 1782 1785 1784 1783 1778  
CONNECT 1774 1773  
CONNECT 1776 1775  
CONNECT 1777 1775  
CONNECT 1779 1778  
CONNECT 1781 1780  
CONNECT 1783 1782  
CONNECT 1784 1782  
CONNECT 1785 1782  
CONNECT 1773 1775 1774

CONNECT 1780 1781 1778  
CONNECT 1788 1791 1790 1789 1786  
CONNECT 1791 1795 1793 1792 1788  
CONNECT 1795 1798 1797 1796 1791  
CONNECT 1787 1786  
CONNECT 1789 1788  
CONNECT 1790 1788  
CONNECT 1792 1791  
CONNECT 1794 1793  
CONNECT 1796 1795  
CONNECT 1797 1795  
CONNECT 1798 1795  
CONNECT 1786 1788 1787  
CONNECT 1793 1794 1791  
CONNECT 1801 1804 1803 1802 1799  
CONNECT 1804 1808 1806 1805 1801  
CONNECT 1808 1811 1810 1809 1804  
CONNECT 1800 1799  
CONNECT 1802 1801  
CONNECT 1803 1801  
CONNECT 1805 1804  
CONNECT 1807 1806  
CONNECT 1809 1808  
CONNECT 1810 1808  
CONNECT 1811 1808  
CONNECT 1799 1801 1800  
CONNECT 1806 1807 1804  
CONNECT 1814 1817 1816 1815 1812  
CONNECT 1817 1821 1819 1818 1814  
CONNECT 1821 1824 1823 1822 1817  
CONNECT 1813 1812  
CONNECT 1815 1814  
CONNECT 1816 1814  
CONNECT 1818 1817  
CONNECT 1820 1819  
CONNECT 1822 1821  
CONNECT 1823 1821  
CONNECT 1824 1821  
CONNECT 1812 1814 1813  
CONNECT 1819 1820 1817  
CONNECT 1827 1830 1829 1828 1825  
CONNECT 1830 1834 1832 1831 1827  
CONNECT 1834 1837 1836 1835 1830  
CONNECT 1826 1825  
CONNECT 1828 1827  
CONNECT 1829 1827  
CONNECT 1831 1830  
CONNECT 1833 1832  
CONNECT 1835 1834  
CONNECT 1836 1834  
CONNECT 1837 1834  
CONNECT 1825 1827 1826  
CONNECT 1832 1833 1830  
CONNECT 1840 1843 1842 1841 1838  
CONNECT 1843 1847 1845 1844 1840  
CONNECT 1847 1850 1849 1848 1843  
CONNECT 1839 1838

CONNECT 1841 1840  
CONNECT 1842 1840  
CONNECT 1844 1843  
CONNECT 1846 1845  
CONNECT 1848 1847  
CONNECT 1849 1847  
CONNECT 1850 1847  
CONNECT 1838 1840 1839  
CONNECT 1845 1846 1843  
CONNECT 1853 1856 1855 1854 1851  
CONNECT 1856 1860 1858 1857 1853  
CONNECT 1860 1863 1862 1861 1856  
CONNECT 1852 1851  
CONNECT 1854 1853  
CONNECT 1855 1853  
CONNECT 1857 1856  
CONNECT 1859 1858  
CONNECT 1861 1860  
CONNECT 1862 1860  
CONNECT 1863 1860  
CONNECT 1851 1853 1852  
CONNECT 1858 1859 1856  
CONNECT 1866 1869 1868 1867 1864  
CONNECT 1869 1873 1871 1870 1866  
CONNECT 1873 1876 1875 1874 1869  
CONNECT 1865 1864  
CONNECT 1867 1866  
CONNECT 1868 1866  
CONNECT 1870 1869  
CONNECT 1872 1871  
CONNECT 1874 1873  
CONNECT 1875 1873  
CONNECT 1876 1873  
CONNECT 1864 1866 1865  
CONNECT 1871 1872 1869  
CONNECT 1879 1882 1881 1880 1877  
CONNECT 1882 1886 1884 1883 1879  
CONNECT 1886 1889 1888 1887 1882  
CONNECT 1878 1877  
CONNECT 1880 1879  
CONNECT 1881 1879  
CONNECT 1883 1882  
CONNECT 1885 1884  
CONNECT 1887 1886  
CONNECT 1888 1886  
CONNECT 1889 1886  
CONNECT 1877 1879 1878  
CONNECT 1884 1885 1882  
CONNECT 1892 1895 1894 1893 1890  
CONNECT 1895 1899 1897 1896 1892  
CONNECT 1899 1902 1901 1900 1895  
CONNECT 1891 1890  
CONNECT 1893 1892  
CONNECT 1894 1892  
CONNECT 1896 1895  
CONNECT 1898 1897  
CONNECT 1900 1899

CONNECT 1901 1899  
CONNECT 1902 1899  
CONNECT 1890 1892 1891  
CONNECT 1897 1898 1895  
CONNECT 1905 1908 1907 1906 1903  
CONNECT 1908 1912 1910 1909 1905  
CONNECT 1912 1915 1914 1913 1908  
CONNECT 1904 1903  
CONNECT 1906 1905  
CONNECT 1907 1905  
CONNECT 1909 1908  
CONNECT 1911 1910  
CONNECT 1913 1912  
CONNECT 1914 1912  
CONNECT 1915 1912  
CONNECT 1903 1905 1904  
CONNECT 1910 1911 1908  
CONNECT 1918 1921 1920 1919 1916  
CONNECT 1921 1925 1923 1922 1918  
CONNECT 1925 1928 1927 1926 1921  
CONNECT 1917 1916  
CONNECT 1919 1918  
CONNECT 1920 1918  
CONNECT 1922 1921  
CONNECT 1924 1923  
CONNECT 1926 1925  
CONNECT 1927 1925  
CONNECT 1928 1925  
CONNECT 1916 1918 1917  
CONNECT 1923 1924 1921  
CONNECT 1931 1934 1933 1932 1929  
CONNECT 1934 1938 1936 1935 1931  
CONNECT 1938 1941 1940 1939 1934  
CONNECT 1930 1929  
CONNECT 1932 1931  
CONNECT 1933 1931  
CONNECT 1935 1934  
CONNECT 1937 1936  
CONNECT 1939 1938  
CONNECT 1940 1938  
CONNECT 1941 1938  
CONNECT 1929 1931 1930  
CONNECT 1936 1937 1934  
CONNECT 1944 1947 1946 1945 1942  
CONNECT 1947 1951 1949 1948 1944  
CONNECT 1951 1954 1953 1952 1947  
CONNECT 1943 1942  
CONNECT 1945 1944  
CONNECT 1946 1944  
CONNECT 1948 1947  
CONNECT 1950 1949  
CONNECT 1952 1951  
CONNECT 1953 1951  
CONNECT 1954 1951  
CONNECT 1942 1944 1943  
CONNECT 1949 1950 1947  
CONNECT 1957 1960 1959 1958 1955



CONNECT 1960 1964 1962 1961 1957  
CONNECT 1964 1967 1966 1965 1960  
CONNECT 1956 1955  
CONNECT 1958 1957  
CONNECT 1959 1957  
CONNECT 1961 1960  
CONNECT 1963 1962  
CONNECT 1965 1964  
CONNECT 1966 1964  
CONNECT 1967 1964  
CONNECT 1955 1957 1956  
CONNECT 1962 1963 1960  
CONNECT 1970 1973 1972 1971 1968  
CONNECT 1973 1977 1975 1974 1970  
CONNECT 1977 1980 1979 1978 1973  
CONNECT 1969 1968  
CONNECT 1971 1970  
CONNECT 1972 1970  
CONNECT 1974 1973  
CONNECT 1976 1975  
CONNECT 1978 1977  
CONNECT 1979 1977  
CONNECT 1980 1977  
CONNECT 1968 1970 1969  
CONNECT 1975 1976 1973  
CONNECT 1983 1986 1985 1984 1981  
CONNECT 1986 1990 1988 1987 1983  
CONNECT 1990 1993 1992 1991 1986  
CONNECT 1982 1981  
CONNECT 1984 1983  
CONNECT 1985 1983  
CONNECT 1987 1986  
CONNECT 1989 1988  
CONNECT 1991 1990  
CONNECT 1992 1990  
CONNECT 1993 1990  
CONNECT 1981 1983 1982  
CONNECT 1988 1989 1986  
CONNECT 1996 1999 1998 1997 1994  
CONNECT 1999 2003 2001 2000 1996  
CONNECT 2003 2006 2005 2004 1999  
CONNECT 1995 1994  
CONNECT 1997 1996  
CONNECT 1998 1996  
CONNECT 2000 1999  
CONNECT 2002 2001  
CONNECT 2004 2003  
CONNECT 2005 2003  
CONNECT 2006 2003  
CONNECT 1994 1996 1995  
CONNECT 2001 2002 1999  
CONNECT 2009 2012 2011 2010 2007  
CONNECT 2012 2016 2014 2013 2009  
CONNECT 2016 2019 2018 2017 2012  
CONNECT 2008 2007  
CONNECT 2010 2009  
CONNECT 2011 2009

CONNECT 2013 2012  
CONNECT 2015 2014  
CONNECT 2017 2016  
CONNECT 2018 2016  
CONNECT 2019 2016  
CONNECT 2007 2009 2008  
CONNECT 2014 2015 2012  
CONNECT 2022 2025 2024 2023 2020  
CONNECT 2025 2029 2027 2026 2022  
CONNECT 2029 2032 2031 2030 2025  
CONNECT 2021 2020  
CONNECT 2023 2022  
CONNECT 2024 2022  
CONNECT 2026 2025  
CONNECT 2028 2027  
CONNECT 2030 2029  
CONNECT 2031 2029  
CONNECT 2032 2029  
CONNECT 2020 2022 2021  
CONNECT 2027 2028 2025  
CONNECT 2035 2038 2037 2036 2033  
CONNECT 2038 2042 2040 2039 2035  
CONNECT 2042 2045 2044 2043 2038  
CONNECT 2034 2033  
CONNECT 2036 2035  
CONNECT 2037 2035  
CONNECT 2039 2038  
CONNECT 2041 2040  
CONNECT 2043 2042  
CONNECT 2044 2042  
CONNECT 2045 2042  
CONNECT 2033 2035 2034  
CONNECT 2040 2041 2038  
CONNECT 2048 2051 2050 2049 2046  
CONNECT 2051 2055 2053 2052 2048  
CONNECT 2055 2058 2057 2056 2051  
CONNECT 2047 2046  
CONNECT 2049 2048  
CONNECT 2050 2048  
CONNECT 2052 2051  
CONNECT 2054 2053  
CONNECT 2056 2055  
CONNECT 2057 2055  
CONNECT 2058 2055  
CONNECT 2046 2048 2047  
CONNECT 2053 2054 2051  
CONNECT 2061 2064 2063 2062 2059  
CONNECT 2064 2068 2066 2065 2061  
CONNECT 2068 2071 2070 2069 2064  
CONNECT 2060 2059  
CONNECT 2062 2061  
CONNECT 2063 2061  
CONNECT 2065 2064  
CONNECT 2067 2066  
CONNECT 2069 2068  
CONNECT 2070 2068  
CONNECT 2071 2068

CONECT 2059 2061 2060  
CONECT 2066 2067 2064  
CONECT 2074 2077 2076 2075 2072  
CONECT 2077 2081 2079 2078 2074  
CONECT 2081 2084 2083 2082 2077  
CONECT 2073 2072  
CONECT 2075 2074  
CONECT 2076 2074  
CONECT 2078 2077  
CONECT 2080 2079  
CONECT 2082 2081  
CONECT 2083 2081  
CONECT 2084 2081  
CONECT 2072 2074 2073  
CONECT 2079 2080 2077  
CONECT 2087 2090 2089 2088 2085  
CONECT 2090 2094 2092 2091 2087  
CONECT 2094 2097 2096 2095 2090  
CONECT 2086 2085  
CONECT 2088 2087  
CONECT 2089 2087  
CONECT 2091 2090  
CONECT 2093 2092  
CONECT 2095 2094  
CONECT 2096 2094  
CONECT 2097 2094  
CONECT 2085 2087 2086  
CONECT 2092 2093 2090  
CONECT 2100 2103 2102 2101 2098  
CONECT 2103 2107 2105 2104 2100  
CONECT 2107 2110 2109 2108 2103  
CONECT 2099 2098  
CONECT 2101 2100  
CONECT 2102 2100  
CONECT 2104 2103  
CONECT 2106 2105  
CONECT 2108 2107  
CONECT 2109 2107  
CONECT 2110 2107  
CONECT 2098 2100 2099  
CONECT 2105 2106 2103  
CONECT 2113 2116 2115 2114 2111  
CONECT 2116 2120 2118 2117 2113  
CONECT 2120 2123 2122 2121 2116  
CONECT 2112 2111  
CONECT 2114 2113  
CONECT 2115 2113  
CONECT 2117 2116  
CONECT 2119 2118  
CONECT 2121 2120  
CONECT 2122 2120  
CONECT 2123 2120  
CONECT 2111 2113 2112  
CONECT 2118 2119 2116  
CONECT 2126 2129 2128 2127 2124  
CONECT 2129 2133 2131 2130 2126  
CONECT 2133 2129 2136 2134 2135

CONNECT 2125 2124  
CONNECT 2127 2126  
CONNECT 2128 2126  
CONNECT 2130 2129  
CONNECT 2132 2131  
CONNECT 2134 2133  
CONNECT 2135 2133  
CONNECT 2136 2133  
CONNECT 2124 2126 2125  
CONNECT 2131 2132 2129  
CONNECT 2139 2140 2142 2137 2141  
CONNECT 2142 2139 2146 2143 2144  
CONNECT 2146 2149 2142 2147 2148  
CONNECT 2138 2137  
CONNECT 2140 2139  
CONNECT 2141 2139  
CONNECT 2143 2142  
CONNECT 2145 2144  
CONNECT 2147 2146  
CONNECT 2148 2146  
CONNECT 2149 2146  
CONNECT 2137 2139 2138  
CONNECT 2144 2145 2142  
CONNECT 2152 2150 2155 2154 2153  
CONNECT 2155 2159 2157 2156 2152  
CONNECT 2159 2162 2161 2160 2155  
CONNECT 2151 2150  
CONNECT 2153 2152  
CONNECT 2154 2152  
CONNECT 2156 2155  
CONNECT 2158 2157  
CONNECT 2160 2159  
CONNECT 2161 2159  
CONNECT 2162 2159  
CONNECT 2150 2151 2152  
CONNECT 2157 2158 2155  
CONNECT 2165 2167 2166 2163 2168  
CONNECT 2168 2165 2172 2170 2169  
CONNECT 2172 2175 2174 2173 2168  
CONNECT 2164 2163  
CONNECT 2166 2165  
CONNECT 2167 2165  
CONNECT 2169 2168  
CONNECT 2171 2170  
CONNECT 2173 2172  
CONNECT 2174 2172  
CONNECT 2175 2172  
CONNECT 2163 2165 2164  
CONNECT 2170 2171 2168  
CONNECT 2178 2181 2180 2179 2176  
CONNECT 2181 2185 2183 2182 2178  
CONNECT 2185 2188 2187 2186 2181  
CONNECT 2177 2176  
CONNECT 2179 2178  
CONNECT 2180 2178  
CONNECT 2182 2181  
CONNECT 2184 2183

CONECT 2186 2185  
CONECT 2187 2185  
CONECT 2188 2185  
CONECT 2176 2178 2177  
CONECT 2183 2184 2181  
CONECT 2191 2194 2193 2192 2189  
CONECT 2194 2198 2196 2195 2191  
CONECT 2198 2201 2200 2199 2194  
CONECT 2190 2189  
CONECT 2192 2191  
CONECT 2193 2191  
CONECT 2195 2194  
CONECT 2197 2196  
CONECT 2199 2198  
CONECT 2200 2198  
CONECT 2201 2198  
CONECT 2189 2191 2190  
CONECT 2196 2197 2194  
CONECT 2204 2207 2206 2205 2202  
CONECT 2207 2211 2208 2209 2204  
CONECT 2211 2214 2213 2212 2207  
CONECT 2203 2202  
CONECT 2205 2204  
CONECT 2206 2204  
CONECT 2208 2207  
CONECT 2210 2209  
CONECT 2212 2211  
CONECT 2213 2211  
CONECT 2214 2211  
CONECT 2202 2204 2203  
CONECT 2209 2210 2207  
CONECT 2217 2220 2219 2218 2215  
CONECT 2220 2224 2222 2221 2217  
CONECT 2224 2226 2225 2227 2220  
CONECT 2216 2215  
CONECT 2218 2217  
CONECT 2219 2217  
CONECT 2221 2220  
CONECT 2223 2222  
CONECT 2225 2224  
CONECT 2226 2224  
CONECT 2227 2224  
CONECT 2215 2217 2216  
CONECT 2222 2223 2220  
CONECT 2230 2232 2231 2233 2228  
CONECT 2233 2237 2235 2234 2230  
CONECT 2237 2240 2239 2238 2233  
CONECT 2229 2228  
CONECT 2231 2230  
CONECT 2232 2230  
CONECT 2234 2233  
CONECT 2236 2235  
CONECT 2238 2237  
CONECT 2239 2237  
CONECT 2240 2237  
CONECT 2228 2230 2229  
CONECT 2235 2236 2233

CONECT 2243 2246 2245 2244 2241  
CONECT 2246 2250 2248 2247 2243  
CONECT 2250 2253 2252 2251 2246  
CONECT 2242 2241  
CONECT 2244 2243  
CONECT 2245 2243  
CONECT 2247 2246  
CONECT 2249 2248  
CONECT 2251 2250  
CONECT 2252 2250  
CONECT 2253 2250  
CONECT 2241 2243 2242  
CONECT 2248 2249 2246  
CONECT 2256 2259 2258 2257 2254  
CONECT 2259 2263 2261 2260 2256  
CONECT 2263 2266 2265 2264 2259  
CONECT 2255 2254  
CONECT 2257 2256  
CONECT 2258 2256  
CONECT 2260 2259  
CONECT 2262 2261  
CONECT 2264 2263  
CONECT 2265 2263  
CONECT 2266 2263  
CONECT 2254 2256 2255  
CONECT 2261 2262 2259  
CONECT 2269 2267 2272 2271 2270  
CONECT 2272 2276 2274 2273 2269  
CONECT 2276 2279 2278 2277 2272  
CONECT 2268 2267  
CONECT 2270 2269  
CONECT 2271 2269  
CONECT 2273 2272  
CONECT 2275 2274  
CONECT 2277 2276  
CONECT 2278 2276  
CONECT 2279 2276  
CONECT 2267 2268 2269  
CONECT 2274 2275 2272  
CONECT 2282 2285 2284 2283 2280  
CONECT 2285 2289 2287 2286 2282  
CONECT 2289 2292 2291 2290 2285  
CONECT 2281 2280  
CONECT 2283 2282  
CONECT 2284 2282  
CONECT 2286 2285  
CONECT 2288 2287  
CONECT 2290 2289  
CONECT 2291 2289  
CONECT 2292 2289  
CONECT 2280 2282 2281  
CONECT 2287 2288 2285  
CONECT 2295 2298 2297 2296 2293  
CONECT 2298 2302 2300 2299 2295  
CONECT 2302 2305 2304 2303 2298  
CONECT 2294 2293  
CONECT 2296 2295

CONNECT 2297 2295  
CONNECT 2299 2298  
CONNECT 2301 2300  
CONNECT 2303 2302  
CONNECT 2304 2302  
CONNECT 2305 2302  
CONNECT 2293 2295 2294  
CONNECT 2300 2301 2298  
CONNECT 2308 2311 2310 2309 2306  
CONNECT 2311 2315 2313 2312 2308  
CONNECT 2315 2318 2317 2316 2311  
CONNECT 2307 2306  
CONNECT 2309 2308  
CONNECT 2310 2308  
CONNECT 2312 2311  
CONNECT 2314 2313  
CONNECT 2316 2315  
CONNECT 2317 2315  
CONNECT 2318 2315  
CONNECT 2306 2308 2307  
CONNECT 2313 2314 2311  
CONNECT 2321 2324 2323 2322 2319  
CONNECT 2324 2328 2326 2325 2321  
CONNECT 2328 2331 2330 2329 2324  
CONNECT 2320 2319  
CONNECT 2322 2321  
CONNECT 2323 2321  
CONNECT 2325 2324  
CONNECT 2327 2326  
CONNECT 2329 2328  
CONNECT 2330 2328  
CONNECT 2331 2328  
CONNECT 2319 2321 2320  
CONNECT 2326 2327 2324  
CONNECT 2334 2337 2336 2335 2332  
CONNECT 2337 2341 2339 2338 2334  
CONNECT 2341 2344 2343 2342 2337  
CONNECT 2333 2332  
CONNECT 2335 2334  
CONNECT 2336 2334  
CONNECT 2338 2337  
CONNECT 2340 2339  
CONNECT 2342 2341  
CONNECT 2343 2341  
CONNECT 2344 2341  
CONNECT 2332 2334 2333  
CONNECT 2339 2340 2337  
CONNECT 2347 2350 2349 2348 2345  
CONNECT 2350 2354 2352 2351 2347  
CONNECT 2354 2357 2356 2355 2350  
CONNECT 2346 2345  
CONNECT 2348 2347  
CONNECT 2349 2347  
CONNECT 2351 2350  
CONNECT 2353 2352  
CONNECT 2355 2354  
CONNECT 2356 2354

CONNECT 2357 2354  
CONNECT 2345 2347 2346  
CONNECT 2352 2353 2350  
CONNECT 2360 2363 2362 2361 2358  
CONNECT 2363 2367 2365 2364 2360  
CONNECT 2367 2370 2369 2368 2363  
CONNECT 2359 2358  
CONNECT 2361 2360  
CONNECT 2362 2360  
CONNECT 2364 2363  
CONNECT 2366 2365  
CONNECT 2368 2367  
CONNECT 2369 2367  
CONNECT 2370 2367  
CONNECT 2358 2360 2359  
CONNECT 2365 2366 2363  
CONNECT 2373 2376 2375 2374 2371  
CONNECT 2376 2380 2378 2377 2373  
CONNECT 2380 2383 2382 2381 2376  
CONNECT 2372 2371  
CONNECT 2374 2373  
CONNECT 2375 2373  
CONNECT 2377 2376  
CONNECT 2379 2378  
CONNECT 2381 2380  
CONNECT 2382 2380  
CONNECT 2383 2380  
CONNECT 2371 2373 2372  
CONNECT 2378 2379 2376  
CONNECT 2386 2389 2388 2387 2384  
CONNECT 2389 2393 2391 2390 2386  
CONNECT 2393 2396 2395 2394 2389  
CONNECT 2385 2384  
CONNECT 2387 2386  
CONNECT 2388 2386  
CONNECT 2390 2389  
CONNECT 2392 2391  
CONNECT 2394 2393  
CONNECT 2395 2393  
CONNECT 2396 2393  
CONNECT 2384 2386 2385  
CONNECT 2391 2392 2389  
CONNECT 2399 2402 2401 2400 2397  
CONNECT 2402 2406 2404 2403 2399  
CONNECT 2406 2409 2408 2407 2402  
CONNECT 2398 2397  
CONNECT 2400 2399  
CONNECT 2401 2399  
CONNECT 2403 2402  
CONNECT 2405 2404  
CONNECT 2407 2406  
CONNECT 2408 2406  
CONNECT 2409 2406  
CONNECT 2397 2399 2398  
CONNECT 2404 2405 2402  
CONNECT 2412 2415 2414 2413 2410  
CONNECT 2415 2419 2417 2416 2412



CONNECT 2419 2422 2421 2420 2415  
CONNECT 2411 2410  
CONNECT 2413 2412  
CONNECT 2414 2412  
CONNECT 2416 2415  
CONNECT 2418 2417  
CONNECT 2420 2419  
CONNECT 2421 2419  
CONNECT 2422 2419  
CONNECT 2410 2412 2411  
CONNECT 2417 2418 2415  
CONNECT 2425 2428 2427 2426 2423  
CONNECT 2428 2432 2430 2429 2425  
CONNECT 2432 2435 2434 2433 2428  
CONNECT 2424 2423  
CONNECT 2426 2425  
CONNECT 2427 2425  
CONNECT 2429 2428  
CONNECT 2431 2430  
CONNECT 2433 2432  
CONNECT 2434 2432  
CONNECT 2435 2432  
CONNECT 2423 2425 2424  
CONNECT 2430 2431 2428  
CONNECT 2438 2441 2440 2439 2436  
CONNECT 2441 2445 2443 2442 2438  
CONNECT 2445 2441 2448 2447 2446  
CONNECT 2437 2436  
CONNECT 2439 2438  
CONNECT 2440 2438  
CONNECT 2442 2441  
CONNECT 2444 2443  
CONNECT 2446 2445  
CONNECT 2447 2445  
CONNECT 2448 2445  
CONNECT 2436 2438 2437  
CONNECT 2443 2444 2441  
CONNECT 2451 2454 2453 2452 2449  
CONNECT 2454 2458 2456 2455 2451  
CONNECT 2458 2461 2460 2459 2454  
CONNECT 2450 2449  
CONNECT 2452 2451  
CONNECT 2453 2451  
CONNECT 2455 2454  
CONNECT 2457 2456  
CONNECT 2459 2458  
CONNECT 2460 2458  
CONNECT 2461 2458  
CONNECT 2449 2451 2450  
CONNECT 2456 2457 2454  
CONNECT 2464 2467 2466 2465 2462  
CONNECT 2467 2471 2469 2468 2464  
CONNECT 2471 2474 2473 2472 2467  
CONNECT 2463 2462  
CONNECT 2465 2464  
CONNECT 2466 2464  
CONNECT 2468 2467

CONNECT 2470 2469  
CONNECT 2472 2471  
CONNECT 2473 2471  
CONNECT 2474 2471  
CONNECT 2462 2464 2463  
CONNECT 2469 2470 2467  
CONNECT 2477 2480 2479 2478 2475  
CONNECT 2480 2484 2482 2481 2477  
CONNECT 2484 2487 2486 2485 2480  
CONNECT 2476 2475  
CONNECT 2478 2477  
CONNECT 2479 2477  
CONNECT 2481 2480  
CONNECT 2483 2482  
CONNECT 2485 2484  
CONNECT 2486 2484  
CONNECT 2487 2484  
CONNECT 2475 2477 2476  
CONNECT 2482 2483 2480  
CONNECT 2490 2493 2492 2491 2488  
CONNECT 2493 2497 2495 2494 2490  
CONNECT 2497 2500 2499 2498 2493  
CONNECT 2489 2488  
CONNECT 2491 2490  
CONNECT 2492 2490  
CONNECT 2494 2493  
CONNECT 2496 2495  
CONNECT 2498 2497  
CONNECT 2499 2497  
CONNECT 2500 2497  
CONNECT 2488 2490 2489  
CONNECT 2495 2496 2493  
CONNECT 2503 2506 2505 2504 2501  
CONNECT 2506 2510 2508 2507 2503  
CONNECT 2510 2513 2512 2511 2506  
CONNECT 2502 2501  
CONNECT 2504 2503  
CONNECT 2505 2503  
CONNECT 2507 2506  
CONNECT 2509 2508  
CONNECT 2511 2510  
CONNECT 2512 2510  
CONNECT 2513 2510  
CONNECT 2501 2503 2502  
CONNECT 2508 2509 2506  
CONNECT 2516 2519 2518 2517 2514  
CONNECT 2519 2523 2521 2520 2516  
CONNECT 2523 2526 2525 2524 2519  
CONNECT 2515 2514  
CONNECT 2517 2516  
CONNECT 2518 2516  
CONNECT 2520 2519  
CONNECT 2522 2521  
CONNECT 2524 2523  
CONNECT 2525 2523  
CONNECT 2526 2523  
CONNECT 2514 2516 2515

CONNECT 2521 2522 2519  
CONNECT 2529 2532 2531 2530 2527  
CONNECT 2532 2536 2534 2533 2529  
CONNECT 2536 2539 2538 2537 2532  
CONNECT 2528 2527  
CONNECT 2530 2529  
CONNECT 2531 2529  
CONNECT 2533 2532  
CONNECT 2535 2534  
CONNECT 2537 2536  
CONNECT 2538 2536  
CONNECT 2539 2536  
CONNECT 2527 2529 2528  
CONNECT 2534 2535 2532  
CONNECT 2542 2543 2540 2544 2545  
CONNECT 2545 2542 2546 2549 2547  
CONNECT 2549 2550 2552 2551 2545  
CONNECT 2541 2540  
CONNECT 2543 2542  
CONNECT 2544 2542  
CONNECT 2546 2545  
CONNECT 2548 2547  
CONNECT 2550 2549  
CONNECT 2551 2549  
CONNECT 2552 2549  
CONNECT 2540 2542 2541  
CONNECT 2547 2548 2545  
CONNECT 2555 2553 2558 2557 2556  
CONNECT 2558 2555 2562 2559 2560  
CONNECT 2562 2565 2558 2564 2563  
CONNECT 2554 2553  
CONNECT 2556 2555  
CONNECT 2557 2555  
CONNECT 2559 2558  
CONNECT 2561 2560  
CONNECT 2563 2562  
CONNECT 2564 2562  
CONNECT 2565 2562  
CONNECT 2553 2554 2555  
CONNECT 2560 2558 2561  
CONNECT 2568 2571 2566 2570 2569  
CONNECT 2571 2572 2575 2568 2573  
CONNECT 2575 2576 2577 2578 2571  
CONNECT 2567 2566  
CONNECT 2569 2568  
CONNECT 2570 2568  
CONNECT 2572 2571  
CONNECT 2574 2573  
CONNECT 2576 2575  
CONNECT 2577 2575  
CONNECT 2578 2575  
CONNECT 2566 2568 2567  
CONNECT 2573 2574 2571  
CONNECT 2581 2579 2582 2583 2584  
CONNECT 2584 2586 2588 2585 2581  
CONNECT 2588 2591 2590 2589 2584  
CONNECT 2580 2579

CONNECT 2582 2581  
CONNECT 2583 2581  
CONNECT 2585 2584  
CONNECT 2587 2586  
CONNECT 2589 2588  
CONNECT 2590 2588  
CONNECT 2591 2588  
CONNECT 2579 2580 2581  
CONNECT 2586 2587 2584  
CONNECT 2594 2597 2592 2596 2595  
CONNECT 2597 2601 2598 2599 2594  
CONNECT 2601 2597 2604 2602 2603  
CONNECT 2593 2592  
CONNECT 2595 2594  
CONNECT 2596 2594  
CONNECT 2598 2597  
CONNECT 2600 2599  
CONNECT 2602 2601  
CONNECT 2603 2601  
CONNECT 2604 2601  
CONNECT 2592 2594 2593  
CONNECT 2599 2600 2597  
CONNECT 2607 2610 2609 2605 2608  
CONNECT 2610 2611 2614 2607 2612  
CONNECT 2614 2616 2610 2615 2617  
CONNECT 2606 2605  
CONNECT 2608 2607  
CONNECT 2609 2607  
CONNECT 2611 2610  
CONNECT 2613 2612  
CONNECT 2615 2614  
CONNECT 2616 2614  
CONNECT 2617 2614  
CONNECT 2605 2607 2606  
CONNECT 2612 2610 2613  
CONNECT 2620 2621 2618 2622 2623  
CONNECT 2623 2620 2627 2625 2624  
CONNECT 2627 2630 2629 2628 2623  
CONNECT 2619 2618  
CONNECT 2621 2620  
CONNECT 2622 2620  
CONNECT 2624 2623  
CONNECT 2626 2625  
CONNECT 2628 2627  
CONNECT 2629 2627  
CONNECT 2630 2627  
CONNECT 2618 2619 2620  
CONNECT 2625 2626 2623  
CONNECT 2633 2635 2631 2634 2636  
CONNECT 2636 2633 2638 2640 2637  
CONNECT 2640 2641 2642 2636 2643  
CONNECT 2632 2631  
CONNECT 2634 2633  
CONNECT 2635 2633  
CONNECT 2637 2636  
CONNECT 2639 2638  
CONNECT 2641 2640

CONECT 2642 2640  
CONECT 2643 2640  
CONECT 2631 2633 2632  
CONECT 2638 2639 2636  
CONECT 2646 2644 2649 2647 2648  
CONECT 2649 2653 2646 2651 2650  
CONECT 2653 2649 2656 2655 2654  
CONECT 2645 2644  
CONECT 2647 2646  
CONECT 2648 2646  
CONECT 2650 2649  
CONECT 2652 2651  
CONECT 2654 2653  
CONECT 2655 2653  
CONECT 2656 2653  
CONECT 2644 2646 2645  
CONECT 2651 2652 2649  
CONECT 2659 2660 2657 2661 2662  
CONECT 2662 2663 2666 2664 2659  
CONECT 2666 2662 2669 2667 2668  
CONECT 2658 2657  
CONECT 2660 2659  
CONECT 2661 2659  
CONECT 2663 2662  
CONECT 2665 2664  
CONECT 2667 2666  
CONECT 2668 2666  
CONECT 2669 2666  
CONECT 2657 2659 2658  
CONECT 2664 2662 2665  
CONECT 2672 2675 2673 2670 2674  
CONECT 2675 2679 2677 2676 2672  
CONECT 2679 2680 2682 2675 2681  
CONECT 2671 2670  
CONECT 2673 2672  
CONECT 2674 2672  
CONECT 2676 2675  
CONECT 2678 2677  
CONECT 2680 2679  
CONECT 2681 2679  
CONECT 2682 2679  
CONECT 2670 2671 2672  
CONECT 2677 2678 2675  
CONECT 2685 2688 2686 2687 2683  
CONECT 2688 2690 2692 2685 2689  
CONECT 2692 2693 2694 2695 2688  
CONECT 2684 2683  
CONECT 2686 2685  
CONECT 2687 2685  
CONECT 2689 2688  
CONECT 2691 2690  
CONECT 2693 2692  
CONECT 2694 2692  
CONECT 2695 2692  
CONECT 2683 2685 2684  
CONECT 2690 2691 2688  
CONECT 2698 2701 2696 2700 2699

CONNECT 2701 2698 2705 2703 2702  
CONNECT 2705 2701 2708 2707 2706  
CONNECT 2697 2696  
CONNECT 2699 2698  
CONNECT 2700 2698  
CONNECT 2702 2701  
CONNECT 2704 2703  
CONNECT 2706 2705  
CONNECT 2707 2705  
CONNECT 2708 2705  
CONNECT 2696 2697 2698  
CONNECT 2703 2701 2704  
CONNECT 2711 2713 2714 2712 2709  
CONNECT 2714 2718 2715 2716 2711  
CONNECT 2718 2720 2721 2714 2719  
CONNECT 2710 2709  
CONNECT 2712 2711  
CONNECT 2713 2711  
CONNECT 2715 2714  
CONNECT 2717 2716  
CONNECT 2719 2718  
CONNECT 2720 2718  
CONNECT 2721 2718  
CONNECT 2709 2710 2711  
CONNECT 2716 2717 2714  
CONNECT 2724 2722 2727 2726 2725  
CONNECT 2727 2731 2728 2729 2724  
CONNECT 2731 2733 2732 2727 2734  
CONNECT 2723 2722  
CONNECT 2725 2724  
CONNECT 2726 2724  
CONNECT 2728 2727  
CONNECT 2730 2729  
CONNECT 2732 2731  
CONNECT 2733 2731  
CONNECT 2734 2731  
CONNECT 2722 2723 2724  
CONNECT 2729 2727 2730  
CONNECT 2737 2735 2740 2739 2738  
CONNECT 2740 2737 2741 2742 2744  
CONNECT 2744 2746 2745 2740 2747  
CONNECT 2736 2735  
CONNECT 2738 2737  
CONNECT 2739 2737  
CONNECT 2741 2740  
CONNECT 2743 2742  
CONNECT 2745 2744  
CONNECT 2746 2744  
CONNECT 2747 2744  
CONNECT 2735 2737 2736  
CONNECT 2742 2743 2740  
CONNECT 2750 2753 2752 2751 2748  
CONNECT 2753 2757 2754 2755 2750  
CONNECT 2757 2760 2753 2758 2759  
CONNECT 2749 2748  
CONNECT 2751 2750  
CONNECT 2752 2750

CONNECT 2754 2753  
CONNECT 2756 2755  
CONNECT 2758 2757  
CONNECT 2759 2757  
CONNECT 2760 2757  
CONNECT 2748 2749 2750  
CONNECT 2755 2756 2753  
CONNECT 2763 2761 2764 2765 2766  
CONNECT 2766 2763 2770 2768 2767  
CONNECT 2770 2771 2766 2773 2772  
CONNECT 2762 2761  
CONNECT 2764 2763  
CONNECT 2765 2763  
CONNECT 2767 2766  
CONNECT 2769 2768  
CONNECT 2771 2770  
CONNECT 2772 2770  
CONNECT 2773 2770  
CONNECT 2761 2763 2762  
CONNECT 2768 2769 2766  
CONNECT 2776 2779 2778 2777 2774  
CONNECT 2779 2776 2783 2780 2781  
CONNECT 2783 2779 2785 2784 2786  
CONNECT 2775 2774  
CONNECT 2777 2776  
CONNECT 2778 2776  
CONNECT 2780 2779  
CONNECT 2782 2781  
CONNECT 2784 2783  
CONNECT 2785 2783  
CONNECT 2786 2783  
CONNECT 2774 2776 2775  
CONNECT 2781 2779 2782  
CONNECT 2789 2787 2791 2792 2790  
CONNECT 2792 2793 2794 2796 2789  
CONNECT 2796 2792 2799 2798 2797  
CONNECT 2788 2787  
CONNECT 2790 2789  
CONNECT 2791 2789  
CONNECT 2793 2792  
CONNECT 2795 2794  
CONNECT 2797 2796  
CONNECT 2798 2796  
CONNECT 2799 2796  
CONNECT 2787 2788 2789  
CONNECT 2794 2792 2795  
CONNECT 2802 2803 2804 2805 2800  
CONNECT 2805 2807 2806 2802 2809  
CONNECT 2809 2805 2811 2812 2810  
CONNECT 2801 2800  
CONNECT 2803 2802  
CONNECT 2804 2802  
CONNECT 2806 2805  
CONNECT 2808 2807  
CONNECT 2810 2809  
CONNECT 2811 2809  
CONNECT 2812 2809

CONECT 2800 2801 2802  
CONECT 2807 2805 2808  
CONECT 2815 2817 2816 2813 2818  
CONECT 2818 2820 2822 2819 2815  
CONECT 2822 2823 2825 2824 2818  
CONECT 2814 2813  
CONECT 2816 2815  
CONECT 2817 2815  
CONECT 2819 2818  
CONECT 2821 2820  
CONECT 2823 2822  
CONECT 2824 2822  
CONECT 2825 2822  
CONECT 2813 2814 2815  
CONECT 2820 2821 2818  
CONECT 2828 2826 2829 2830 2831  
CONECT 2831 2835 2833 2828 2832  
CONECT 2835 2837 2836 2838 2831  
CONECT 2827 2826  
CONECT 2829 2828  
CONECT 2830 2828  
CONECT 2832 2831  
CONECT 2834 2833  
CONECT 2836 2835  
CONECT 2837 2835  
CONECT 2838 2835  
CONECT 2826 2827 2828  
CONECT 2833 2834 2831  
CONECT 2841 2843 2844 2839 2842  
CONECT 2844 2845 2846 2841 2848  
CONECT 2848 2851 2850 2844 2849  
CONECT 2840 2839  
CONECT 2842 2841  
CONECT 2843 2841  
CONECT 2845 2844  
CONECT 2847 2846  
CONECT 2849 2848  
CONECT 2850 2848  
CONECT 2851 2848  
CONECT 2839 2840 2841  
CONECT 2846 2844 2847  
CONECT 2854 2852 2855 2856 2857  
CONECT 2857 2861 2858 2854 2859  
CONECT 2861 2863 2862 2864 2857  
CONECT 2853 2852  
CONECT 2855 2854  
CONECT 2856 2854  
CONECT 2858 2857  
CONECT 2860 2859  
CONECT 2862 2861  
CONECT 2863 2861  
CONECT 2864 2861  
CONECT 2852 2853 2854  
CONECT 2859 2860 2857  
CONECT 2867 2865 2868 2869 2870  
CONECT 2870 2871 2874 2867 2872  
CONECT 2874 2877 2876 2875 2870



CONNECT 2866 2865  
CONNECT 2868 2867  
CONNECT 2869 2867  
CONNECT 2871 2870  
CONNECT 2873 2872  
CONNECT 2875 2874  
CONNECT 2876 2874  
CONNECT 2877 2874  
CONNECT 2865 2866 2867  
CONNECT 2872 2873 2870  
CONNECT 2880 2878 2881 2883 2882  
CONNECT 2883 2885 2887 2880 2884  
CONNECT 2887 2888 2890 2883 2889  
CONNECT 2879 2878  
CONNECT 2881 2880  
CONNECT 2882 2880  
CONNECT 2884 2883  
CONNECT 2886 2885  
CONNECT 2888 2887  
CONNECT 2889 2887  
CONNECT 2890 2887  
CONNECT 2878 2879 2880  
CONNECT 2885 2886 2883  
CONNECT 2893 2891 2895 2894 2896  
CONNECT 2896 2897 2898 2900 2893  
CONNECT 2900 2901 2902 2896 2903  
CONNECT 2892 2891  
CONNECT 2894 2893  
CONNECT 2895 2893  
CONNECT 2897 2896  
CONNECT 2899 2898  
CONNECT 2901 2900  
CONNECT 2902 2900  
CONNECT 2903 2900  
CONNECT 2891 2892 2893  
CONNECT 2898 2899 2896  
CONNECT 2906 2909 2907 2904 2908  
CONNECT 2909 2910 2913 2911 2906  
CONNECT 2913 2909 2915 2914 2916  
CONNECT 2905 2904  
CONNECT 2907 2906  
CONNECT 2908 2906  
CONNECT 2910 2909  
CONNECT 2912 2911  
CONNECT 2914 2913  
CONNECT 2915 2913  
CONNECT 2916 2913  
CONNECT 2904 2905 2906  
CONNECT 2911 2909 2912  
CONNECT 2919 2920 2921 2917 2922  
CONNECT 2922 2924 2926 2923 2919  
CONNECT 2926 2929 2928 2927 2922  
CONNECT 2918 2917  
CONNECT 2920 2919  
CONNECT 2921 2919  
CONNECT 2923 2922  
CONNECT 2925 2924

CONECT 2927 2926  
CONECT 2928 2926  
CONECT 2929 2926  
CONECT 2917 2919 2918  
CONECT 2924 2925 2922  
CONECT 2932 2934 2935 2933 2930  
CONECT 2935 2932 2936 2937 2939  
CONECT 2939 2935 2940 2942 2941  
CONECT 2931 2930  
CONECT 2933 2932  
CONECT 2934 2932  
CONECT 2936 2935  
CONECT 2938 2937  
CONECT 2940 2939  
CONECT 2941 2939  
CONECT 2942 2939  
CONECT 2930 2932 2931  
CONECT 2937 2935 2938  
CONECT 2945 2943 2947 2946 2948  
CONECT 2948 2950 2952 2945 2949  
CONECT 2952 2955 2953 2954 2948  
CONECT 2944 2943  
CONECT 2946 2945  
CONECT 2947 2945  
CONECT 2949 2948  
CONECT 2951 2950  
CONECT 2953 2952  
CONECT 2954 2952  
CONECT 2955 2952  
CONECT 2943 2944 2945  
CONECT 2950 2951 2948  
CONECT 2958 2956 2959 2960 2961  
CONECT 2961 2965 2963 2962 2958  
CONECT 2965 2968 2967 2966 2961  
CONECT 2957 2956  
CONECT 2959 2958  
CONECT 2960 2958  
CONECT 2962 2961  
CONECT 2964 2963  
CONECT 2966 2965  
CONECT 2967 2965  
CONECT 2968 2965  
CONECT 2956 2957 2958  
CONECT 2963 2964 2961  
CONECT 2971 2972 2973 2969 2974  
CONECT 2974 2971 2975 2976 2978  
CONECT 2978 2979 2981 2974 2980  
CONECT 2970 2969  
CONECT 2972 2971  
CONECT 2973 2971  
CONECT 2975 2974  
CONECT 2977 2976  
CONECT 2979 2978  
CONECT 2980 2978  
CONECT 2981 2978  
CONECT 2969 2971 2970  
CONECT 2976 2977 2974

CONNECT 2984 2982 2985 2987 2986  
CONNECT 2987 2989 2984 2991 2988  
CONNECT 2991 2992 2993 2994 2987  
CONNECT 2983 2982  
CONNECT 2985 2984  
CONNECT 2986 2984  
CONNECT 2988 2987  
CONNECT 2990 2989  
CONNECT 2992 2991  
CONNECT 2993 2991  
CONNECT 2994 2991  
CONNECT 2982 2984 2983  
CONNECT 2989 2990 2987  
CONNECT 2997 3000 2998 2999 2995  
CONNECT 3000 3002 2997 3004 3001  
CONNECT 3004 3000 3006 3007 3005  
CONNECT 2996 2995  
CONNECT 2998 2997  
CONNECT 2999 2997  
CONNECT 3001 3000  
CONNECT 3003 3002  
CONNECT 3005 3004  
CONNECT 3006 3004  
CONNECT 3007 3004  
CONNECT 2995 2997 2996  
CONNECT 3002 3000 3003  
CONNECT 3010 3011 3012 3013 3008  
CONNECT 3013 3015 3014 3017 3010  
CONNECT 3017 3013 3019 3020 3018  
CONNECT 3009 3008  
CONNECT 3011 3010  
CONNECT 3012 3010  
CONNECT 3014 3013  
CONNECT 3016 3015  
CONNECT 3018 3017  
CONNECT 3019 3017  
CONNECT 3020 3017  
CONNECT 3008 3009 3010  
CONNECT 3015 3013 3016  
CONNECT 3023 3024 3025 3021 3026  
CONNECT 3026 3030 3028 3027 3023  
CONNECT 3030 3033 3032 3031 3026  
CONNECT 3022 3021  
CONNECT 3024 3023  
CONNECT 3025 3023  
CONNECT 3027 3026  
CONNECT 3029 3028  
CONNECT 3031 3030  
CONNECT 3032 3030  
CONNECT 3033 3030  
CONNECT 3021 3022 3023  
CONNECT 3028 3029 3026  
CONNECT 3036 3034 3037 3038 3039  
CONNECT 3039 3036 3040 3041 3043  
CONNECT 3043 3039 3044 3046 3045  
CONNECT 3035 3034  
CONNECT 3037 3036

CONNECT 3038 3036  
CONNECT 3040 3039  
CONNECT 3042 3041  
CONNECT 3044 3043  
CONNECT 3045 3043  
CONNECT 3046 3043  
CONNECT 3034 3035 3036  
CONNECT 3041 3039 3042  
CONNECT 3049 3047 3050 3051 3052  
CONNECT 3052 3049 3053 3054 3056  
CONNECT 3056 3052 3057 3058 3059  
CONNECT 3048 3047  
CONNECT 3050 3049  
CONNECT 3051 3049  
CONNECT 3053 3052  
CONNECT 3055 3054  
CONNECT 3057 3056  
CONNECT 3058 3056  
CONNECT 3059 3056  
CONNECT 3047 3048 3049  
CONNECT 3054 3052 3055  
CONNECT 3062 3060 3063 3064 3065  
CONNECT 3065 3062 3066 3067 3069  
CONNECT 3069 3072 3065 3070 3071  
CONNECT 3061 3060  
CONNECT 3063 3062  
CONNECT 3064 3062  
CONNECT 3066 3065  
CONNECT 3068 3067  
CONNECT 3070 3069  
CONNECT 3071 3069  
CONNECT 3072 3069  
CONNECT 3060 3061 3062  
CONNECT 3067 3065 3068  
CONNECT 3075 3076 3077 3073 3078  
CONNECT 3078 3075 3082 3080 3079  
CONNECT 3082 3084 3085 3078 3083  
CONNECT 3074 3073  
CONNECT 3076 3075  
CONNECT 3077 3075  
CONNECT 3079 3078  
CONNECT 3081 3080  
CONNECT 3083 3082  
CONNECT 3084 3082  
CONNECT 3085 3082  
CONNECT 3073 3074 3075  
CONNECT 3080 3078 3081  
CONNECT 3088 3086 3090 3091 3089  
CONNECT 3091 3095 3093 3088 3092  
CONNECT 3095 3098 3096 3097 3091  
CONNECT 3087 3086  
CONNECT 3089 3088  
CONNECT 3090 3088  
CONNECT 3092 3091  
CONNECT 3094 3093  
CONNECT 3096 3095  
CONNECT 3097 3095

CONNECT 3098 3095  
CONNECT 3086 3087 3088  
CONNECT 3093 3091 3094  
CONNECT 3101 3099 3104 3102 3103  
CONNECT 3104 3101 3105 3106 3108  
CONNECT 3108 3104 3109 3110 3111  
CONNECT 3100 3099  
CONNECT 3102 3101  
CONNECT 3103 3101  
CONNECT 3105 3104  
CONNECT 3107 3106  
CONNECT 3109 3108  
CONNECT 3110 3108  
CONNECT 3111 3108  
CONNECT 3099 3100 3101  
CONNECT 3106 3104 3107  
CONNECT 3114 3112 3117 3116 3115  
CONNECT 3117 3114 3119 3118 3121  
CONNECT 3121 3124 3117 3122 3123  
CONNECT 3113 3112  
CONNECT 3115 3114  
CONNECT 3116 3114  
CONNECT 3118 3117  
CONNECT 3120 3119  
CONNECT 3122 3121  
CONNECT 3123 3121  
CONNECT 3124 3121  
CONNECT 3112 3114 3113  
CONNECT 3119 3117 3120  
CONNECT 3127 3130 3125 3128 3129  
CONNECT 3130 3131 3134 3127 3132  
CONNECT 3134 3137 3130 3135 3136  
CONNECT 3126 3125  
CONNECT 3128 3127  
CONNECT 3129 3127  
CONNECT 3131 3130  
CONNECT 3133 3132  
CONNECT 3135 3134  
CONNECT 3136 3134  
CONNECT 3137 3134  
CONNECT 3125 3126 3127  
CONNECT 3132 3130 3133  
CONNECT 3140 3143 3142 3138 3141  
CONNECT 3143 3144 3145 3147 3140  
CONNECT 3147 3143 3148 3149 3150  
CONNECT 3139 3138  
CONNECT 3141 3140  
CONNECT 3142 3140  
CONNECT 3144 3143  
CONNECT 3146 3145  
CONNECT 3148 3147  
CONNECT 3149 3147  
CONNECT 3150 3147  
CONNECT 3138 3139 3140  
CONNECT 3145 3143 3146  
CONNECT 3153 3151 3154 3155 3156  
CONNECT 3156 3158 3153 3160 3157

CONNECT 3160 3162 3161 3163 3156  
CONNECT 3152 3151  
CONNECT 3154 3153  
CONNECT 3155 3153  
CONNECT 3157 3156  
CONNECT 3159 3158  
CONNECT 3161 3160  
CONNECT 3162 3160  
CONNECT 3163 3160  
CONNECT 3151 3152 3153  
CONNECT 3158 3159 3156  
CONNECT 3166 3167 3168 3169 3164  
CONNECT 3169 3171 3173 3166 3170  
CONNECT 3173 3174 3169 3175 3176  
CONNECT 3165 3164  
CONNECT 3167 3166  
CONNECT 3168 3166  
CONNECT 3170 3169  
CONNECT 3172 3171  
CONNECT 3174 3173  
CONNECT 3175 3173  
CONNECT 3176 3173  
CONNECT 3164 3166 3165  
CONNECT 3171 3169 3172  
CONNECT 3179 3182 3180 3181 3177  
CONNECT 3182 3183 3186 3184 3179  
CONNECT 3186 3182 3187 3188 3189  
CONNECT 3178 3177  
CONNECT 3180 3179  
CONNECT 3181 3179  
CONNECT 3183 3182  
CONNECT 3185 3184  
CONNECT 3187 3186  
CONNECT 3188 3186  
CONNECT 3189 3186  
CONNECT 3177 3179 3178  
CONNECT 3184 3182 3185  
CONNECT 3192 3193 3194 3190 3195  
CONNECT 3195 3192 3196 3199 3197  
CONNECT 3199 3201 3195 3200 3202  
CONNECT 3191 3190  
CONNECT 3193 3192  
CONNECT 3194 3192  
CONNECT 3196 3195  
CONNECT 3198 3197  
CONNECT 3200 3199  
CONNECT 3201 3199  
CONNECT 3202 3199  
CONNECT 3190 3191 3192  
CONNECT 3197 3195 3198  
CONNECT 3205 3206 3207 3208 3203  
CONNECT 3208 3209 3205 3212 3210  
CONNECT 3212 3214 3208 3213 3215  
CONNECT 3204 3203  
CONNECT 3206 3205  
CONNECT 3207 3205  
CONNECT 3209 3208

CONNECT 3211 3210  
CONNECT 3213 3212  
CONNECT 3214 3212  
CONNECT 3215 3212  
CONNECT 3203 3204 3205  
CONNECT 3210 3208 3211  
CONNECT 3218 3219 3220 3221 3216  
CONNECT 3221 3223 3225 3222 3218  
CONNECT 3225 3227 3228 3221 3226  
CONNECT 3217 3216  
CONNECT 3219 3218  
CONNECT 3220 3218  
CONNECT 3222 3221  
CONNECT 3224 3223  
CONNECT 3226 3225  
CONNECT 3227 3225  
CONNECT 3228 3225  
CONNECT 3216 3217 3218  
CONNECT 3223 3224 3221  
CONNECT 3231 3234 3232 3233 3229  
CONNECT 3234 3235 3231 3238 3236  
CONNECT 3238 3234 3239 3240 3241  
CONNECT 3230 3229  
CONNECT 3232 3231  
CONNECT 3233 3231  
CONNECT 3235 3234  
CONNECT 3237 3236  
CONNECT 3239 3238  
CONNECT 3240 3238  
CONNECT 3241 3238  
CONNECT 3229 3231 3230  
CONNECT 3236 3234 3237  
CONNECT 3244 3246 3247 3242 3245  
CONNECT 3247 3251 3248 3249 3244  
CONNECT 3251 3252 3253 3254 3247  
CONNECT 3243 3242  
CONNECT 3245 3244  
CONNECT 3246 3244  
CONNECT 3248 3247  
CONNECT 3250 3249  
CONNECT 3252 3251  
CONNECT 3253 3251  
CONNECT 3254 3251  
CONNECT 3242 3243 3244  
CONNECT 3249 3250 3247  
CONNECT 3257 3258 3255 3259 3260  
CONNECT 3260 3264 3257 3261 3262  
CONNECT 3264 3265 3260 3266 3267  
CONNECT 3256 3255  
CONNECT 3258 3257  
CONNECT 3259 3257  
CONNECT 3261 3260  
CONNECT 3263 3262  
CONNECT 3265 3264  
CONNECT 3266 3264  
CONNECT 3267 3264  
CONNECT 3255 3257 3256

CONNECT 3262 3263 3260  
CONNECT 3270 3271 3272 3273 3268  
CONNECT 3273 3270 3274 3275 3277  
CONNECT 3277 3278 3279 3273 3280  
CONNECT 3269 3268  
CONNECT 3271 3270  
CONNECT 3272 3270  
CONNECT 3274 3273  
CONNECT 3276 3275  
CONNECT 3278 3277  
CONNECT 3279 3277  
CONNECT 3280 3277  
CONNECT 3268 3269 3270  
CONNECT 3275 3276 3273  
CONNECT 3283 3281 3285 3286 3284  
CONNECT 3286 3283 3287 3288 3290  
CONNECT 3290 3286 3291 3292 3293  
CONNECT 3282 3281  
CONNECT 3284 3283  
CONNECT 3285 3283  
CONNECT 3287 3286  
CONNECT 3289 3288  
CONNECT 3291 3290  
CONNECT 3292 3290  
CONNECT 3293 3290  
CONNECT 3281 3283 3282  
CONNECT 3288 3286 3289  
CONNECT 3296 3298 3299 3297 3294  
CONNECT 3299 3300 3301 3303 3296  
CONNECT 3303 3306 3299 3304 3305  
CONNECT 3295 3294  
CONNECT 3297 3296  
CONNECT 3298 3296  
CONNECT 3300 3299  
CONNECT 3302 3301  
CONNECT 3304 3303  
CONNECT 3305 3303  
CONNECT 3306 3303  
CONNECT 3294 3296 3295  
CONNECT 3301 3299 3302  
CONNECT 3309 3307 3310 3311 3312  
CONNECT 3312 3309 3313 3314 3316  
CONNECT 3316 3317 3318 3319 3312  
CONNECT 3308 3307  
CONNECT 3310 3309  
CONNECT 3311 3309  
CONNECT 3313 3312  
CONNECT 3315 3314  
CONNECT 3317 3316  
CONNECT 3318 3316  
CONNECT 3319 3316  
CONNECT 3307 3308 3309  
CONNECT 3314 3312 3315  
CONNECT 3322 3320 3323 3324 3325  
CONNECT 3325 3322 3326 3327 3329  
CONNECT 3329 3330 3331 3332 3325  
CONNECT 3321 3320



CONNECT 3323 3322  
CONNECT 3324 3322  
CONNECT 3326 3325  
CONNECT 3328 3327  
CONNECT 3330 3329  
CONNECT 3331 3329  
CONNECT 3332 3329  
CONNECT 3320 3321 3322  
CONNECT 3327 3325 3328  
CONNECT 3335 3336 3337 3338 3333  
CONNECT 3338 3339 3340 3335 3342  
CONNECT 3342 3344 3338 3343 3345  
CONNECT 3334 3333  
CONNECT 3336 3335  
CONNECT 3337 3335  
CONNECT 3339 3338  
CONNECT 3341 3340  
CONNECT 3343 3342  
CONNECT 3344 3342  
CONNECT 3345 3342  
CONNECT 3333 3334 3335  
CONNECT 3340 3338 3341  
CONNECT 3348 3346 3351 3349 3350  
CONNECT 3351 3355 3353 3352 3348  
CONNECT 3355 3351 3357 3356 3358  
CONNECT 3347 3346  
CONNECT 3349 3348  
CONNECT 3350 3348  
CONNECT 3352 3351  
CONNECT 3354 3353  
CONNECT 3356 3355  
CONNECT 3357 3355  
CONNECT 3358 3355  
CONNECT 3346 3347 3348  
CONNECT 3353 3351 3354  
CONNECT 3361 3364 3362 3363 3359  
CONNECT 3364 3361 3366 3368 3365  
CONNECT 3368 3364 3371 3369 3370  
CONNECT 3360 3359  
CONNECT 3362 3361  
CONNECT 3363 3361  
CONNECT 3365 3364  
CONNECT 3367 3366  
CONNECT 3369 3368  
CONNECT 3370 3368  
CONNECT 3371 3368  
CONNECT 3359 3360 3361  
CONNECT 3366 3364 3367  
CONNECT 3374 3377 3372 3376 3375  
CONNECT 3377 3379 3374 3378 3381  
CONNECT 3381 3383 3377 3382 3384  
CONNECT 3373 3372  
CONNECT 3375 3374  
CONNECT 3376 3374  
CONNECT 3378 3377  
CONNECT 3380 3379  
CONNECT 3382 3381

CONNECT 3383 3381  
CONNECT 3384 3381  
CONNECT 3372 3374 3373  
CONNECT 3379 3377 3380  
CONNECT 3387 3388 3390 3389 3385  
CONNECT 3390 3392 3394 3391 3387  
CONNECT 3394 3390 3395 3396 3397  
CONNECT 3386 3385  
CONNECT 3388 3387  
CONNECT 3389 3387  
CONNECT 3391 3390  
CONNECT 3393 3392  
CONNECT 3395 3394  
CONNECT 3396 3394  
CONNECT 3397 3394  
CONNECT 3385 3386 3387  
CONNECT 3392 3390 3393  
CONNECT 3400 3402 3403 3401 3398  
CONNECT 3403 3407 3404 3400 3405  
CONNECT 3407 3403 3410 3408 3409  
CONNECT 3399 3398  
CONNECT 3401 3400  
CONNECT 3402 3400  
CONNECT 3404 3403  
CONNECT 3406 3405  
CONNECT 3408 3407  
CONNECT 3409 3407  
CONNECT 3410 3407  
CONNECT 3398 3399 3400  
CONNECT 3405 3403 3406  
CONNECT 3413 3416 3414 3415 3411  
CONNECT 3416 3413 3417 3420 3418  
CONNECT 3420 3423 3422 3416 3421  
CONNECT 3412 3411  
CONNECT 3414 3413  
CONNECT 3415 3413  
CONNECT 3417 3416  
CONNECT 3419 3418  
CONNECT 3421 3420  
CONNECT 3422 3420  
CONNECT 3423 3420  
CONNECT 3411 3412 3413  
CONNECT 3418 3419 3416  
CONNECT 3426 3428 3424 3429 3427  
CONNECT 3429 3430 3426 3431 3433  
CONNECT 3433 3434 3436 3435 3429  
CONNECT 3425 3424  
CONNECT 3427 3426  
CONNECT 3428 3426  
CONNECT 3430 3429  
CONNECT 3432 3431  
CONNECT 3434 3433  
CONNECT 3435 3433  
CONNECT 3436 3433  
CONNECT 3424 3425 3426  
CONNECT 3431 3429 3432  
CONNECT 3439 3437 3442 3440 3441

CONNECT 3442 3443 3446 3439 3444  
CONNECT 3446 3449 3448 3442 3447  
CONNECT 3438 3437  
CONNECT 3440 3439  
CONNECT 3441 3439  
CONNECT 3443 3442  
CONNECT 3445 3444  
CONNECT 3447 3446  
CONNECT 3448 3446  
CONNECT 3449 3446  
CONNECT 3437 3439 3438  
CONNECT 3444 3442 3445  
CONNECT 3452 3454 3455 3453 3450  
CONNECT 3455 3457 3452 3459 3456  
CONNECT 3459 3455 3462 3461 3460  
CONNECT 3451 3450  
CONNECT 3453 3452  
CONNECT 3454 3452  
CONNECT 3456 3455  
CONNECT 3458 3457  
CONNECT 3460 3459  
CONNECT 3461 3459  
CONNECT 3462 3459  
CONNECT 3450 3452 3451  
CONNECT 3457 3455 3458  
CONNECT 3465 3463 3468 3467 3466  
CONNECT 3468 3465 3470 3469 3472  
CONNECT 3472 3475 3468 3473 3474  
CONNECT 3464 3463  
CONNECT 3466 3465  
CONNECT 3467 3465  
CONNECT 3469 3468  
CONNECT 3471 3470  
CONNECT 3473 3472  
CONNECT 3474 3472  
CONNECT 3475 3472  
CONNECT 3463 3464 3465  
CONNECT 3470 3471 3468  
CONNECT 3478 3479 3476 3481 3480  
CONNECT 3481 3478 3485 3483 3482  
CONNECT 3485 3488 3486 3487 3481  
CONNECT 3477 3476  
CONNECT 3479 3478  
CONNECT 3480 3478  
CONNECT 3482 3481  
CONNECT 3484 3483  
CONNECT 3486 3485  
CONNECT 3487 3485  
CONNECT 3488 3485  
CONNECT 3476 3478 3477  
CONNECT 3483 3484 3481  
CONNECT 3491 3489 3493 3494 3492  
CONNECT 3494 3491 3498 3496 3495  
CONNECT 3498 3501 3500 3499 3494  
CONNECT 3490 3489  
CONNECT 3492 3491  
CONNECT 3493 3491

CONNECT 3495 3494  
CONNECT 3497 3496  
CONNECT 3499 3498  
CONNECT 3500 3498  
CONNECT 3501 3498  
CONNECT 3489 3491 3490  
CONNECT 3496 3497 3494  
CONNECT 3504 3505 3506 3502 3507  
CONNECT 3507 3511 3509 3504 3508  
CONNECT 3511 3514 3513 3512 3507  
CONNECT 3503 3502  
CONNECT 3505 3504  
CONNECT 3506 3504  
CONNECT 3508 3507  
CONNECT 3510 3509  
CONNECT 3512 3511  
CONNECT 3513 3511  
CONNECT 3514 3511  
CONNECT 3502 3503 3504  
CONNECT 3509 3510 3507  
CONNECT 3517 3519 3515 3520 3518  
CONNECT 3520 3521 3522 3524 3517  
CONNECT 3524 3526 3520 3527 3525  
CONNECT 3516 3515  
CONNECT 3518 3517  
CONNECT 3519 3517  
CONNECT 3521 3520  
CONNECT 3523 3522  
CONNECT 3525 3524  
CONNECT 3526 3524  
CONNECT 3527 3524  
CONNECT 3515 3516 3517  
CONNECT 3522 3520 3523  
CONNECT 3530 3533 3531 3528 3532  
CONNECT 3533 3530 3537 3534 3535  
CONNECT 3537 3533 3538 3539 3540  
CONNECT 3529 3528  
CONNECT 3531 3530  
CONNECT 3532 3530  
CONNECT 3534 3533  
CONNECT 3536 3535  
CONNECT 3538 3537  
CONNECT 3539 3537  
CONNECT 3540 3537  
CONNECT 3528 3530 3529  
CONNECT 3535 3533 3536  
CONNECT 3543 3541 3545 3546 3544  
CONNECT 3546 3547 3550 3548 3543  
CONNECT 3550 3553 3551 3546 3552  
CONNECT 3542 3541  
CONNECT 3544 3543  
CONNECT 3545 3543  
CONNECT 3547 3546  
CONNECT 3549 3548  
CONNECT 3551 3550  
CONNECT 3552 3550  
CONNECT 3553 3550

CONNECT 3541 3542 3543  
CONNECT 3548 3549 3546  
CONNECT 3556 3559 3558 3554 3557  
CONNECT 3559 3556 3561 3560 3563  
CONNECT 3563 3559 3564 3566 3565  
CONNECT 3555 3554  
CONNECT 3557 3556  
CONNECT 3558 3556  
CONNECT 3560 3559  
CONNECT 3562 3561  
CONNECT 3564 3563  
CONNECT 3565 3563  
CONNECT 3566 3563  
CONNECT 3554 3556 3555  
CONNECT 3561 3559 3562  
CONNECT 3569 3570 3572 3567 3571  
CONNECT 3572 3573 3574 3576 3569  
CONNECT 3576 3579 3577 3578 3572  
CONNECT 3568 3567  
CONNECT 3570 3569  
CONNECT 3571 3569  
CONNECT 3573 3572  
CONNECT 3575 3574  
CONNECT 3577 3576  
CONNECT 3578 3576  
CONNECT 3579 3576  
CONNECT 3567 3568 3569  
CONNECT 3574 3572 3575  
CONNECT 3582 3580 3583 3585 3584  
CONNECT 3585 3582 3589 3586 3587  
CONNECT 3589 3592 3591 3590 3585  
CONNECT 3581 3580  
CONNECT 3583 3582  
CONNECT 3584 3582  
CONNECT 3586 3585  
CONNECT 3588 3587  
CONNECT 3590 3589  
CONNECT 3591 3589  
CONNECT 3592 3589  
CONNECT 3580 3581 3582  
CONNECT 3587 3585 3588  
CONNECT 3595 3597 3593 3596 3598  
CONNECT 3598 3602 3599 3600 3595  
CONNECT 3602 3605 3604 3598 3603  
CONNECT 3594 3593  
CONNECT 3596 3595  
CONNECT 3597 3595  
CONNECT 3599 3598  
CONNECT 3601 3600  
CONNECT 3603 3602  
CONNECT 3604 3602  
CONNECT 3605 3602  
CONNECT 3593 3595 3594  
CONNECT 3600 3601 3598  
CONNECT 3608 3611 3609 3606 3610  
CONNECT 3611 3613 3608 3612 3615  
CONNECT 3615 3611 3618 3617 3616

CONNECT 3607 3606  
CONNECT 3609 3608  
CONNECT 3610 3608  
CONNECT 3612 3611  
CONNECT 3614 3613  
CONNECT 3616 3615  
CONNECT 3617 3615  
CONNECT 3618 3615  
CONNECT 3606 3607 3608  
CONNECT 3613 3611 3614  
CONNECT 3621 3624 3619 3622 3623  
CONNECT 3624 3621 3625 3626 3628  
CONNECT 3628 3630 3624 3629 3631  
CONNECT 3620 3619  
CONNECT 3622 3621  
CONNECT 3623 3621  
CONNECT 3625 3624  
CONNECT 3627 3626  
CONNECT 3629 3628  
CONNECT 3630 3628  
CONNECT 3631 3628  
CONNECT 3619 3621 3620  
CONNECT 3626 3624 3627  
CONNECT 3634 3637 3632 3636 3635  
CONNECT 3637 3638 3641 3634 3639  
CONNECT 3641 3643 3637 3642 3644  
CONNECT 3633 3632  
CONNECT 3635 3634  
CONNECT 3636 3634  
CONNECT 3638 3637  
CONNECT 3640 3639  
CONNECT 3642 3641  
CONNECT 3643 3641  
CONNECT 3644 3641  
CONNECT 3632 3633 3634  
CONNECT 3639 3637 3640  
CONNECT 3647 3648 3649 3650 3645  
CONNECT 3650 3652 3647 3654 3651  
CONNECT 3654 3650 3657 3656 3655  
CONNECT 3646 3645  
CONNECT 3648 3647  
CONNECT 3649 3647  
CONNECT 3651 3650  
CONNECT 3653 3652  
CONNECT 3655 3654  
CONNECT 3656 3654  
CONNECT 3657 3654  
CONNECT 3645 3647 3646  
CONNECT 3652 3653 3650  
CONNECT 3660 3661 3662 3663 3658  
CONNECT 3663 3667 3664 3665 3660  
CONNECT 3667 3670 3669 3668 3663  
CONNECT 3659 3658  
CONNECT 3661 3660  
CONNECT 3662 3660  
CONNECT 3664 3663  
CONNECT 3666 3665

CONNECT 3668 3667  
CONNECT 3669 3667  
CONNECT 3670 3667  
CONNECT 3658 3659 3660  
CONNECT 3665 3663 3666  
CONNECT 3673 3671 3674 3675 3676  
CONNECT 3676 3673 3677 3680 3678  
CONNECT 3680 3681 3683 3676 3682  
CONNECT 3672 3671  
CONNECT 3674 3673  
CONNECT 3675 3673  
CONNECT 3677 3676  
CONNECT 3679 3678  
CONNECT 3681 3680  
CONNECT 3682 3680  
CONNECT 3683 3680  
CONNECT 3671 3673 3672  
CONNECT 3678 3676 3679  
CONNECT 3686 3689 3684 3688 3687  
CONNECT 3689 3690 3686 3693 3691  
CONNECT 3693 3696 3689 3695 3694  
CONNECT 3685 3684  
CONNECT 3687 3686  
CONNECT 3688 3686  
CONNECT 3690 3689  
CONNECT 3692 3691  
CONNECT 3694 3693  
CONNECT 3695 3693  
CONNECT 3696 3693  
CONNECT 3684 3686 3685  
CONNECT 3691 3689 3692  
CONNECT 3699 3697 3701 3700 3702  
CONNECT 3702 3706 3704 3703 3699  
CONNECT 3706 3707 3709 3708 3702  
CONNECT 3698 3697  
CONNECT 3700 3699  
CONNECT 3701 3699  
CONNECT 3703 3702  
CONNECT 3705 3704  
CONNECT 3707 3706  
CONNECT 3708 3706  
CONNECT 3709 3706  
CONNECT 3697 3698 3699  
CONNECT 3704 3705 3702  
CONNECT 3712 3710 3713 3714 3715  
CONNECT 3715 3712 3716 3719 3717  
CONNECT 3719 3715 3720 3721 3722  
CONNECT 3711 3710  
CONNECT 3713 3712  
CONNECT 3714 3712  
CONNECT 3716 3715  
CONNECT 3718 3717  
CONNECT 3720 3719  
CONNECT 3721 3719  
CONNECT 3722 3719  
CONNECT 3710 3711 3712  
CONNECT 3717 3715 3718

CONNECT 3725 3723 3726 3727 3728  
CONNECT 3728 3730 3725 3729 3732  
CONNECT 3732 3728 3733 3735 3734  
CONNECT 3724 3723  
CONNECT 3726 3725  
CONNECT 3727 3725  
CONNECT 3729 3728  
CONNECT 3731 3730  
CONNECT 3733 3732  
CONNECT 3734 3732  
CONNECT 3735 3732  
CONNECT 3723 3724 3725  
CONNECT 3730 3731 3728  
CONNECT 3738 3740 3741 3739 3736  
CONNECT 3741 3738 3743 3742 3745  
CONNECT 3745 3747 3746 3741 3748  
CONNECT 3737 3736  
CONNECT 3739 3738  
CONNECT 3740 3738  
CONNECT 3742 3741  
CONNECT 3744 3743  
CONNECT 3746 3745  
CONNECT 3747 3745  
CONNECT 3748 3745  
CONNECT 3736 3738 3737  
CONNECT 3743 3744 3741  
CONNECT 3751 3749 3753 3754 3752  
CONNECT 3754 3755 3758 3756 3751  
CONNECT 3758 3760 3754 3761 3759  
CONNECT 3750 3749  
CONNECT 3752 3751  
CONNECT 3753 3751  
CONNECT 3755 3754  
CONNECT 3757 3756  
CONNECT 3759 3758  
CONNECT 3760 3758  
CONNECT 3761 3758  
CONNECT 3749 3750 3751  
CONNECT 3756 3754 3757  
CONNECT 3764 3765 3766 3762 3767  
CONNECT 3767 3768 3771 3764 3769  
CONNECT 3771 3772 3774 3767 3773  
CONNECT 3763 3762  
CONNECT 3765 3764  
CONNECT 3766 3764  
CONNECT 3768 3767  
CONNECT 3770 3769  
CONNECT 3772 3771  
CONNECT 3773 3771  
CONNECT 3774 3771  
CONNECT 3762 3764 3763  
CONNECT 3769 3767 3770  
CONNECT 3777 3778 3780 3775 3779  
CONNECT 3780 3782 3784 3777 3781  
CONNECT 3784 3780 3785 3786 3787  
CONNECT 3776 3775  
CONNECT 3778 3777



CONNECT 3779 3777  
CONNECT 3781 3780  
CONNECT 3783 3782  
CONNECT 3785 3784  
CONNECT 3786 3784  
CONNECT 3787 3784  
CONNECT 3775 3776 3777  
CONNECT 3782 3780 3783  
CONNECT 3790 3792 3791 3788 3793  
CONNECT 3793 3797 3794 3795 3790  
CONNECT 3797 3800 3799 3793 3798  
CONNECT 3789 3788  
CONNECT 3791 3790  
CONNECT 3792 3790  
CONNECT 3794 3793  
CONNECT 3796 3795  
CONNECT 3798 3797  
CONNECT 3799 3797  
CONNECT 3800 3797  
CONNECT 3788 3789 3790  
CONNECT 3795 3796 3793  
CONNECT 3803 3804 3805 3806 3801  
CONNECT 3806 3807 3810 3808 3803  
CONNECT 3810 3811 3806 3813 3812  
CONNECT 3802 3801  
CONNECT 3804 3803  
CONNECT 3805 3803  
CONNECT 3807 3806  
CONNECT 3809 3808  
CONNECT 3811 3810  
CONNECT 3812 3810  
CONNECT 3813 3810  
CONNECT 3801 3803 3802  
CONNECT 3808 3809 3806  
CONNECT 3816 3817 3818 3819 3814  
CONNECT 3819 3823 3821 3816 3820  
CONNECT 3823 3826 3825 3824 3819  
CONNECT 3815 3814  
CONNECT 3817 3816  
CONNECT 3818 3816  
CONNECT 3820 3819  
CONNECT 3822 3821  
CONNECT 3824 3823  
CONNECT 3825 3823  
CONNECT 3826 3823  
CONNECT 3814 3816 3815  
CONNECT 3821 3822 3819  
CONNECT 3829 3832 3831 3830 3827  
CONNECT 3832 3834 3836 3833 3829  
CONNECT 3836 3839 3838 3837 3832  
CONNECT 3828 3827  
CONNECT 3830 3829  
CONNECT 3831 3829  
CONNECT 3833 3832  
CONNECT 3835 3834  
CONNECT 3837 3836  
CONNECT 3838 3836

CONNECT 3839 3836  
CONNECT 3827 3829 3828  
CONNECT 3834 3835 3832  
CONNECT 3842 3845 3844 3843 3840  
CONNECT 3845 3847 3846 3849 3842  
CONNECT 3849 3845 3850 3852 3851  
CONNECT 3841 3840  
CONNECT 3843 3842  
CONNECT 3844 3842  
CONNECT 3846 3845  
CONNECT 3848 3847  
CONNECT 3850 3849  
CONNECT 3851 3849  
CONNECT 3852 3849  
CONNECT 3840 3842 3841  
CONNECT 3847 3845 3848  
CONNECT 3855 3853 3857 3858 3856  
CONNECT 3858 3862 3860 3859 3855  
CONNECT 3862 3865 3864 3863 3858  
CONNECT 3854 3853  
CONNECT 3856 3855  
CONNECT 3857 3855  
CONNECT 3859 3858  
CONNECT 3861 3860  
CONNECT 3863 3862  
CONNECT 3864 3862  
CONNECT 3865 3862  
CONNECT 3853 3854 3855  
CONNECT 3860 3861 3858  
CONNECT 3868 3871 3869 3870 3866  
CONNECT 3871 3875 3873 3872 3868  
CONNECT 3875 3878 3877 3876 3871  
CONNECT 3867 3866  
CONNECT 3869 3868  
CONNECT 3870 3868  
CONNECT 3872 3871  
CONNECT 3874 3873  
CONNECT 3876 3875  
CONNECT 3877 3875  
CONNECT 3878 3875  
CONNECT 3866 3868 3867  
CONNECT 3873 3874 3871  
CONNECT 3881 3882 3879 3884 3883  
CONNECT 3884 3881 3888 3886 3885  
CONNECT 3888 3891 3890 3889 3884  
CONNECT 3880 3879  
CONNECT 3882 3881  
CONNECT 3883 3881  
CONNECT 3885 3884  
CONNECT 3887 3886  
CONNECT 3889 3888  
CONNECT 3890 3888  
CONNECT 3891 3888  
CONNECT 3879 3880 3881  
CONNECT 3886 3887 3884  
CONNECT 3894 3895 3892 3896 3897  
CONNECT 3897 3894 3899 3898 3901

CONNECT 3901 3904 3903 3902 3897  
CONNECT 3893 3892  
CONNECT 3895 3894  
CONNECT 3896 3894  
CONNECT 3898 3897  
CONNECT 3900 3899  
CONNECT 3902 3901  
CONNECT 3903 3901  
CONNECT 3904 3901  
CONNECT 3892 3894 3893  
CONNECT 3899 3900 3897  
CONNECT 3907 3910 3909 3908 3905  
CONNECT 3910 3914 3912 3911 3907  
CONNECT 3914 3917 3916 3915 3910  
CONNECT 3906 3905  
CONNECT 3908 3907  
CONNECT 3909 3907  
CONNECT 3911 3910  
CONNECT 3913 3912  
CONNECT 3915 3914  
CONNECT 3916 3914  
CONNECT 3917 3914  
CONNECT 3905 3907 3906  
CONNECT 3912 3913 3910  
CONNECT 3920 3923 3922 3921 3918  
CONNECT 3923 3927 3925 3924 3920  
CONNECT 3927 3930 3929 3928 3923  
CONNECT 3919 3918  
CONNECT 3921 3920  
CONNECT 3922 3920  
CONNECT 3924 3923  
CONNECT 3926 3925  
CONNECT 3928 3927  
CONNECT 3929 3927  
CONNECT 3930 3927  
CONNECT 3918 3920 3919  
CONNECT 3925 3926 3923  
CONNECT 3933 3935 3936 3931 3934  
CONNECT 3936 3940 3933 3937 3938  
CONNECT 3940 3936 3943 3942 3941  
CONNECT 3932 3931  
CONNECT 3934 3933  
CONNECT 3935 3933  
CONNECT 3937 3936  
CONNECT 3939 3938  
CONNECT 3941 3940  
CONNECT 3942 3940  
CONNECT 3943 3940  
CONNECT 3931 3932 3933  
CONNECT 3938 3936 3939  
CONNECT 3946 3949 3947 3948 3944  
CONNECT 3949 3953 3951 3950 3946  
CONNECT 3953 3956 3954 3955 3949  
CONNECT 3945 3944  
CONNECT 3947 3946  
CONNECT 3948 3946  
CONNECT 3950 3949

CONNECT 3952 3951  
CONNECT 3954 3953  
CONNECT 3955 3953  
CONNECT 3956 3953  
CONNECT 3944 3946 3945  
CONNECT 3951 3952 3949  
CONNECT 3959 3957 3962 3961 3960  
CONNECT 3962 3966 3964 3963 3959  
CONNECT 3966 3969 3968 3967 3962  
CONNECT 3958 3957  
CONNECT 3960 3959  
CONNECT 3961 3959  
CONNECT 3963 3962  
CONNECT 3965 3964  
CONNECT 3967 3966  
CONNECT 3968 3966  
CONNECT 3969 3966  
CONNECT 3957 3958 3959  
CONNECT 3964 3965 3962  
CONNECT 3972 3975 3974 3973 3970  
CONNECT 3975 3979 3977 3976 3972  
CONNECT 3979 3982 3981 3980 3975  
CONNECT 3971 3970  
CONNECT 3973 3972  
CONNECT 3974 3972  
CONNECT 3976 3975  
CONNECT 3978 3977  
CONNECT 3980 3979  
CONNECT 3981 3979  
CONNECT 3982 3979  
CONNECT 3970 3972 3971  
CONNECT 3977 3978 3975  
CONNECT 3985 3988 3987 3986 3983  
CONNECT 3988 3992 3990 3989 3985  
CONNECT 3992 3995 3994 3993 3988  
CONNECT 3984 3983  
CONNECT 3986 3985  
CONNECT 3987 3985  
CONNECT 3989 3988  
CONNECT 3991 3990  
CONNECT 3993 3992  
CONNECT 3994 3992  
CONNECT 3995 3992  
CONNECT 3983 3985 3984  
CONNECT 3990 3991 3988  
CONNECT 3998 4001 3999 4000 3996  
CONNECT 4001 4005 4003 4002 3998  
CONNECT 4005 4008 4007 4006 4001  
CONNECT 3997 3996  
CONNECT 3999 3998  
CONNECT 4000 3998  
CONNECT 4002 4001  
CONNECT 4004 4003  
CONNECT 4006 4005  
CONNECT 4007 4005  
CONNECT 4008 4005  
CONNECT 3996 3998 3997

CONNECT 4003 4004 4001  
CONNECT 4011 4014 4012 4013 4009  
CONNECT 4014 4018 4011 4016 4015  
CONNECT 4018 4019 4014 4020 4021  
CONNECT 4010 4009  
CONNECT 4012 4011  
CONNECT 4013 4011  
CONNECT 4015 4014  
CONNECT 4017 4016  
CONNECT 4019 4018  
CONNECT 4020 4018  
CONNECT 4021 4018  
CONNECT 4009 4011 4010  
CONNECT 4016 4017 4014  
CONNECT 4024 4025 4026 4027 4022  
CONNECT 4027 4028 4029 4024 4031  
CONNECT 4031 4034 4033 4027 4032  
CONNECT 4023 4022  
CONNECT 4025 4024  
CONNECT 4026 4024  
CONNECT 4028 4027  
CONNECT 4030 4029  
CONNECT 4032 4031  
CONNECT 4033 4031  
CONNECT 4034 4031  
CONNECT 4022 4023 4024  
CONNECT 4029 4027 4030  
CONNECT 4037 4038 4035 4039 4040  
CONNECT 4040 4037 4044 4042 4041  
CONNECT 4044 4046 4045 4047 4040  
CONNECT 4036 4035  
CONNECT 4038 4037  
CONNECT 4039 4037  
CONNECT 4041 4040  
CONNECT 4043 4042  
CONNECT 4045 4044  
CONNECT 4046 4044  
CONNECT 4047 4044  
CONNECT 4035 4036 4037  
CONNECT 4042 4043 4040  
CONNECT 4050 4053 4052 4051 4048  
CONNECT 4053 4050 4054 4055 4057  
CONNECT 4057 4053 4058 4059 4060  
CONNECT 4049 4048  
CONNECT 4051 4050  
CONNECT 4052 4050  
CONNECT 4054 4053  
CONNECT 4056 4055  
CONNECT 4058 4057  
CONNECT 4059 4057  
CONNECT 4060 4057  
CONNECT 4048 4050 4049  
CONNECT 4055 4053 4056  
CONNECT 4063 4061 4064 4065 4066  
CONNECT 4066 4068 4070 4063 4067  
CONNECT 4070 4071 4072 4073 4066  
CONNECT 4062 4061

CONNECT 4064 4063  
CONNECT 4065 4063  
CONNECT 4067 4066  
CONNECT 4069 4068  
CONNECT 4071 4070  
CONNECT 4072 4070  
CONNECT 4073 4070  
CONNECT 4061 4062 4063  
CONNECT 4068 4069 4066  
CONNECT 4076 4074 4077 4079 4078  
CONNECT 4079 4076 4080 4081 4083  
CONNECT 4083 4085 4086 4079 4084  
CONNECT 4075 4074  
CONNECT 4077 4076  
CONNECT 4078 4076  
CONNECT 4080 4079  
CONNECT 4082 4081  
CONNECT 4084 4083  
CONNECT 4085 4083  
CONNECT 4086 4083  
CONNECT 4074 4075 4076  
CONNECT 4081 4079 4082  
CONNECT 4089 4087 4092 4091 4090  
CONNECT 4092 4089 4094 4093 4096  
CONNECT 4096 4099 4092 4098 4097  
CONNECT 4088 4087  
CONNECT 4090 4089  
CONNECT 4091 4089  
CONNECT 4093 4092  
CONNECT 4095 4094  
CONNECT 4097 4096  
CONNECT 4098 4096  
CONNECT 4099 4096  
CONNECT 4087 4088 4089  
CONNECT 4094 4095 4092  
CONNECT 4102 4100 4103 4104 4105  
CONNECT 4105 4102 4109 4106 4107  
CONNECT 4109 4110 4111 4112 4105  
CONNECT 4101 4100  
CONNECT 4103 4102  
CONNECT 4104 4102  
CONNECT 4106 4105  
CONNECT 4108 4107  
CONNECT 4110 4109  
CONNECT 4111 4109  
CONNECT 4112 4109  
CONNECT 4100 4102 4101  
CONNECT 4107 4105 4108  
CONNECT 4115 4113 4116 4117 4118  
CONNECT 4118 4115 4119 4120 4122  
CONNECT 4122 4118 4123 4124 4125  
CONNECT 4114 4113  
CONNECT 4116 4115  
CONNECT 4117 4115  
CONNECT 4119 4118  
CONNECT 4121 4120  
CONNECT 4123 4122

CONECT 4124 4122  
CONECT 4125 4122  
CONECT 4113 4114 4115  
CONECT 4120 4118 4121  
CONECT 4128 4126 4129 4130 4131  
CONECT 4131 4133 4135 4128 4132  
CONECT 4135 4136 4137 4138 4131  
CONECT 4127 4126  
CONECT 4129 4128  
CONECT 4130 4128  
CONECT 4132 4131  
CONECT 4134 4133  
CONECT 4136 4135  
CONECT 4137 4135  
CONECT 4138 4135  
CONECT 4126 4127 4128  
CONECT 4133 4134 4131  
CONECT 4141 4139 4142 4143 4144  
CONECT 4144 4141 4148 4145 4146  
CONECT 4148 4144 4149 4150 4151  
CONECT 4140 4139  
CONECT 4142 4141  
CONECT 4143 4141  
CONECT 4145 4144  
CONECT 4147 4146  
CONECT 4149 4148  
CONECT 4150 4148  
CONECT 4151 4148  
CONECT 4139 4140 4141  
CONECT 4146 4147 4144  
CONECT 4154 4152 4155 4156 4157  
CONECT 4157 4154 4158 4159 4161  
CONECT 4161 4157 4162 4163 4164  
CONECT 4153 4152  
CONECT 4155 4154  
CONECT 4156 4154  
CONECT 4158 4157  
CONECT 4160 4159  
CONECT 4162 4161  
CONECT 4163 4161  
CONECT 4164 4161  
CONECT 4152 4153 4154  
CONECT 4159 4157 4160  
CONECT 4167 4165 4168 4169 4170  
CONECT 4170 4174 4167 4171 4172  
CONECT 4174 4175 4176 4177 4170  
CONECT 4166 4165  
CONECT 4168 4167  
CONECT 4169 4167  
CONECT 4171 4170  
CONECT 4173 4172  
CONECT 4175 4174  
CONECT 4176 4174  
CONECT 4177 4174  
CONECT 4165 4166 4167  
CONECT 4172 4173 4170  
CONECT 4180 4181 4182 4183 4178

CONECT 4183 4180 4184 4185 4187  
CONECT 4187 4183 4188 4189 4190  
CONECT 4179 4178  
CONECT 4181 4180  
CONECT 4182 4180  
CONECT 4184 4183  
CONECT 4186 4185  
CONECT 4188 4187  
CONECT 4189 4187  
CONECT 4190 4187  
CONECT 4178 4179 4180  
CONECT 4185 4183 4186  
CONECT 4193 4191 4194 4195 4196  
CONECT 4196 4193 4197 4198 4200  
CONECT 4200 4196 4201 4202 4203  
CONECT 4192 4191  
CONECT 4194 4193  
CONECT 4195 4193  
CONECT 4197 4196  
CONECT 4199 4198  
CONECT 4201 4200  
CONECT 4202 4200  
CONECT 4203 4200  
CONECT 4191 4192 4193  
CONECT 4198 4196 4199  
CONECT 4206 4204 4207 4208 4209  
CONECT 4209 4206 4210 4211 4213  
CONECT 4213 4209 4215 4216 4214  
CONECT 4205 4204  
CONECT 4207 4206  
CONECT 4208 4206  
CONECT 4210 4209  
CONECT 4212 4211  
CONECT 4214 4213  
CONECT 4215 4213  
CONECT 4216 4213  
CONECT 4204 4205 4206  
CONECT 4211 4209 4212  
CONECT 4219 4217 4220 4221 4222  
CONECT 4222 4219 4223 4224 4226  
CONECT 4226 4222 4227 4228 4229  
CONECT 4218 4217  
CONECT 4220 4219  
CONECT 4221 4219  
CONECT 4223 4222  
CONECT 4225 4224  
CONECT 4227 4226  
CONECT 4228 4226  
CONECT 4229 4226  
CONECT 4217 4218 4219  
CONECT 4224 4222 4225  
CONECT 4232 4230 4233 4234 4235  
CONECT 4235 4239 4232 4236 4237  
CONECT 4239 4240 4241 4235 4242  
CONECT 4231 4230  
CONECT 4233 4232  
CONECT 4234 4232



CONNECT 4236 4235  
CONNECT 4238 4237  
CONNECT 4240 4239  
CONNECT 4241 4239  
CONNECT 4242 4239  
CONNECT 4230 4231 4232  
CONNECT 4237 4235 4238  
CONNECT 4245 4243 4247 4246 4248  
CONNECT 4248 4249 4250 4245 4252  
CONNECT 4252 4254 4255 4253 4248  
CONNECT 4244 4243  
CONNECT 4246 4245  
CONNECT 4247 4245  
CONNECT 4249 4248  
CONNECT 4251 4250  
CONNECT 4253 4252  
CONNECT 4254 4252  
CONNECT 4255 4252  
CONNECT 4243 4244 4245  
CONNECT 4250 4251 4248  
CONNECT 4258 4261 4260 4259 4256  
CONNECT 4261 4263 4258 4262 4265  
CONNECT 4265 4261 4266 4267 4268  
CONNECT 4257 4256  
CONNECT 4259 4258  
CONNECT 4260 4258  
CONNECT 4262 4261  
CONNECT 4264 4263  
CONNECT 4266 4265  
CONNECT 4267 4265  
CONNECT 4268 4265  
CONNECT 4256 4258 4257  
CONNECT 4263 4261 4264  
CONNECT 4271 4273 4274 4269 4272  
CONNECT 4274 4278 4276 4275 4271  
CONNECT 4278 4274 4281 4280 4279  
CONNECT 4270 4269  
CONNECT 4272 4271  
CONNECT 4273 4271  
CONNECT 4275 4274  
CONNECT 4277 4276  
CONNECT 4279 4278  
CONNECT 4280 4278  
CONNECT 4281 4278  
CONNECT 4269 4270 4271  
CONNECT 4276 4277 4274  
CONNECT 4284 4282 4287 4286 4285  
CONNECT 4287 4291 4289 4288 4284  
CONNECT 4291 4294 4293 4292 4287  
CONNECT 4283 4282  
CONNECT 4285 4284  
CONNECT 4286 4284  
CONNECT 4288 4287  
CONNECT 4290 4289  
CONNECT 4292 4291  
CONNECT 4293 4291  
CONNECT 4294 4291

CONNECT 4282 4283 4284  
CONNECT 4289 4290 4287  
CONNECT 4297 4300 4299 4298 4295  
CONNECT 4300 4301 4304 4297 4302  
CONNECT 4304 4305 4306 4307 4300  
CONNECT 4296 4295  
CONNECT 4298 4297  
CONNECT 4299 4297  
CONNECT 4301 4300  
CONNECT 4303 4302  
CONNECT 4305 4304  
CONNECT 4306 4304  
CONNECT 4307 4304  
CONNECT 4295 4297 4296  
CONNECT 4302 4303 4300  
CONNECT 4310 4308 4313 4312 4311  
CONNECT 4313 4314 4310 4315 4317  
CONNECT 4317 4313 4319 4318 4320  
CONNECT 4309 4308  
CONNECT 4311 4310  
CONNECT 4312 4310  
CONNECT 4314 4313  
CONNECT 4316 4315  
CONNECT 4318 4317  
CONNECT 4319 4317  
CONNECT 4320 4317  
CONNECT 4308 4309 4310  
CONNECT 4315 4316 4313  
CONNECT 4323 4326 4325 4321 4324  
CONNECT 4326 4323 4328 4327 4330  
CONNECT 4330 4331 4332 4326 4333  
CONNECT 4322 4321  
CONNECT 4324 4323  
CONNECT 4325 4323  
CONNECT 4327 4326  
CONNECT 4329 4328  
CONNECT 4331 4330  
CONNECT 4332 4330  
CONNECT 4333 4330  
CONNECT 4321 4323 4322  
CONNECT 4328 4326 4329  
CONNECT 4336 4337 4334 4339 4338  
CONNECT 4339 4336 4343 4340 4341  
CONNECT 4343 4344 4346 4345 4339  
CONNECT 4335 4334  
CONNECT 4337 4336  
CONNECT 4338 4336  
CONNECT 4340 4339  
CONNECT 4342 4341  
CONNECT 4344 4343  
CONNECT 4345 4343  
CONNECT 4346 4343  
CONNECT 4334 4336 4335  
CONNECT 4341 4342 4339  
CONNECT 4349 4352 4350 4347 4351  
CONNECT 4352 4354 4353 4349 4356  
CONNECT 4356 4357 4352 4358 4359

CONNECT 4348 4347  
CONNECT 4350 4349  
CONNECT 4351 4349  
CONNECT 4353 4352  
CONNECT 4355 4354  
CONNECT 4357 4356  
CONNECT 4358 4356  
CONNECT 4359 4356  
CONNECT 4347 4349 4348  
CONNECT 4354 4355 4352  
CONNECT 4362 4365 4360 4364 4363  
CONNECT 4365 4369 4362 4367 4366  
CONNECT 4369 4365 4370 4372 4371  
CONNECT 4361 4360  
CONNECT 4363 4362  
CONNECT 4364 4362  
CONNECT 4366 4365  
CONNECT 4368 4367  
CONNECT 4370 4369  
CONNECT 4371 4369  
CONNECT 4372 4369  
CONNECT 4360 4362 4361  
CONNECT 4367 4365 4368  
CONNECT 4375 4378 4373 4377 4376  
CONNECT 4378 4379 4375 4382 4380  
CONNECT 4382 4378 4385 4383 4384  
CONNECT 4374 4373  
CONNECT 4376 4375  
CONNECT 4377 4375  
CONNECT 4379 4378  
CONNECT 4381 4380  
CONNECT 4383 4382  
CONNECT 4384 4382  
CONNECT 4385 4382  
CONNECT 4373 4374 4375  
CONNECT 4380 4378 4381  
CONNECT 4388 4389 4391 4386 4390  
CONNECT 4391 4388 4392 4393 4395  
CONNECT 4395 4398 4391 4396 4397  
CONNECT 4387 4386  
CONNECT 4389 4388  
CONNECT 4390 4388  
CONNECT 4392 4391  
CONNECT 4394 4393  
CONNECT 4396 4395  
CONNECT 4397 4395  
CONNECT 4398 4395  
CONNECT 4386 4388 4387  
CONNECT 4393 4394 4391  
CONNECT 4401 4403 4404 4399 4402  
CONNECT 4404 4406 4405 4408 4401  
CONNECT 4408 4404 4409 4410 4411  
CONNECT 4400 4399  
CONNECT 4402 4401  
CONNECT 4403 4401  
CONNECT 4405 4404  
CONNECT 4407 4406

CONECT 4409 4408  
CONECT 4410 4408  
CONECT 4411 4408  
CONECT 4399 4400 4401  
CONECT 4406 4404 4407  
CONECT 4414 4412 4417 4416 4415  
CONECT 4417 4421 4419 4414 4418  
CONECT 4421 4422 4417 4423 4424  
CONECT 4413 4412  
CONECT 4415 4414  
CONECT 4416 4414  
CONECT 4418 4417  
CONECT 4420 4419  
CONECT 4422 4421  
CONECT 4423 4421  
CONECT 4424 4421  
CONECT 4412 4414 4413  
CONECT 4419 4420 4417  
CONECT 4427 4425 4428 4429 4430  
CONECT 4430 4427 4431 4432 4434  
CONECT 4434 4430 4435 4436 4437  
CONECT 4426 4425  
CONECT 4428 4427  
CONECT 4429 4427  
CONECT 4431 4430  
CONECT 4433 4432  
CONECT 4435 4434  
CONECT 4436 4434  
CONECT 4437 4434  
CONECT 4425 4426 4427  
CONECT 4432 4430 4433  
CONECT 4440 4443 4438 4442 4441  
CONECT 4443 4444 4445 4447 4440  
CONECT 4447 4443 4448 4449 4450  
CONECT 4439 4438  
CONECT 4441 4440  
CONECT 4442 4440  
CONECT 4444 4443  
CONECT 4446 4445  
CONECT 4448 4447  
CONECT 4449 4447  
CONECT 4450 4447  
CONECT 4438 4439 4440  
CONECT 4445 4443 4446  
CONECT 4453 4454 4455 4456 4451  
CONECT 4456 4453 4457 4458 4460  
CONECT 4460 4456 4461 4462 4463  
CONECT 4452 4451  
CONECT 4454 4453  
CONECT 4455 4453  
CONECT 4457 4456  
CONECT 4459 4458  
CONECT 4461 4460  
CONECT 4462 4460  
CONECT 4463 4460  
CONECT 4451 4453 4452  
CONECT 4458 4456 4459

CONNECT 4466 4464 4467 4468 4469  
CONNECT 4469 4466 4470 4471 4473  
CONNECT 4473 4476 4469 4475 4474  
CONNECT 4465 4464  
CONNECT 4467 4466  
CONNECT 4468 4466  
CONNECT 4470 4469  
CONNECT 4472 4471  
CONNECT 4474 4473  
CONNECT 4475 4473  
CONNECT 4476 4473  
CONNECT 4464 4465 4466  
CONNECT 4471 4469 4472  
CONNECT 4479 4481 4482 4480 4477  
CONNECT 4482 4479 4483 4484 4486  
CONNECT 4486 4482 4487 4488 4489  
CONNECT 4478 4477  
CONNECT 4480 4479  
CONNECT 4481 4479  
CONNECT 4483 4482  
CONNECT 4485 4484  
CONNECT 4487 4486  
CONNECT 4488 4486  
CONNECT 4489 4486  
CONNECT 4477 4478 4479  
CONNECT 4484 4482 4485  
CONNECT 4492 4490 4493 4494 4495  
CONNECT 4495 4492 4496 4497 4499  
CONNECT 4499 4495 4500 4502 4501  
CONNECT 4491 4490  
CONNECT 4493 4492  
CONNECT 4494 4492  
CONNECT 4496 4495  
CONNECT 4498 4497  
CONNECT 4500 4499  
CONNECT 4501 4499  
CONNECT 4502 4499  
CONNECT 4490 4491 4492  
CONNECT 4497 4495 4498  
CONNECT 4505 4506 4507 4508 4503  
CONNECT 4508 4512 4509 4505 4510  
CONNECT 4512 4514 4508 4513 4515  
CONNECT 4504 4503  
CONNECT 4506 4505  
CONNECT 4507 4505  
CONNECT 4509 4508  
CONNECT 4511 4510  
CONNECT 4513 4512  
CONNECT 4514 4512  
CONNECT 4515 4512  
CONNECT 4503 4504 4505  
CONNECT 4510 4511 4508  
CONNECT 4518 4516 4521 4519 4520  
CONNECT 4521 4518 4525 4523 4522  
CONNECT 4525 4528 4526 4521 4527  
CONNECT 4517 4516  
CONNECT 4519 4518

CONNECT 4520 4518  
CONNECT 4522 4521  
CONNECT 4524 4523  
CONNECT 4526 4525  
CONNECT 4527 4525  
CONNECT 4528 4525  
CONNECT 4516 4518 4517  
CONNECT 4523 4521 4524  
CONNECT 4531 4532 4534 4533 4529  
CONNECT 4534 4536 4538 4535 4531  
CONNECT 4538 4540 4541 4539 4534  
CONNECT 4530 4529  
CONNECT 4532 4531  
CONNECT 4533 4531  
CONNECT 4535 4534  
CONNECT 4537 4536  
CONNECT 4539 4538  
CONNECT 4540 4538  
CONNECT 4541 4538  
CONNECT 4529 4530 4531  
CONNECT 4536 4537 4534  
CONNECT 4544 4542 4545 4547 4546  
CONNECT 4547 4551 4549 4548 4544  
CONNECT 4551 4554 4552 4553 4547  
CONNECT 4543 4542  
CONNECT 4545 4544  
CONNECT 4546 4544  
CONNECT 4548 4547  
CONNECT 4550 4549  
CONNECT 4552 4551  
CONNECT 4553 4551  
CONNECT 4554 4551  
CONNECT 4542 4543 4544  
CONNECT 4549 4550 4547  
CONNECT 4557 4560 4559 4558 4555  
CONNECT 4560 4561 4564 4562 4557  
CONNECT 4564 4560 4565 4566 4567  
CONNECT 4556 4555  
CONNECT 4558 4557  
CONNECT 4559 4557  
CONNECT 4561 4560  
CONNECT 4563 4562  
CONNECT 4565 4564  
CONNECT 4566 4564  
CONNECT 4567 4564  
CONNECT 4555 4557 4556  
CONNECT 4562 4560 4563  
CONNECT 4570 4572 4573 4568 4571  
CONNECT 4573 4574 4575 4577 4570  
CONNECT 4577 4573 4578 4579 4580  
CONNECT 4569 4568  
CONNECT 4571 4570  
CONNECT 4572 4570  
CONNECT 4574 4573  
CONNECT 4576 4575  
CONNECT 4578 4577  
CONNECT 4579 4577

CONNECT 4580 4577  
CONNECT 4568 4569 4570  
CONNECT 4575 4573 4576  
CONNECT 4583 4584 4586 4585 4581  
CONNECT 4586 4583 4590 4587 4588  
CONNECT 4590 4593 4586 4592 4591  
CONNECT 4582 4581  
CONNECT 4584 4583  
CONNECT 4585 4583  
CONNECT 4587 4586  
CONNECT 4589 4588  
CONNECT 4591 4590  
CONNECT 4592 4590  
CONNECT 4593 4590  
CONNECT 4581 4582 4583  
CONNECT 4588 4586 4589  
CONNECT 4596 4594 4599 4598 4597  
CONNECT 4599 4600 4596 4601 4603  
CONNECT 4603 4599 4604 4605 4606  
CONNECT 4595 4594  
CONNECT 4597 4596  
CONNECT 4598 4596  
CONNECT 4600 4599  
CONNECT 4602 4601  
CONNECT 4604 4603  
CONNECT 4605 4603  
CONNECT 4606 4603  
CONNECT 4594 4595 4596  
CONNECT 4601 4599 4602  
CONNECT 4609 4610 4607 4611 4612  
CONNECT 4612 4609 4613 4614 4616  
CONNECT 4616 4612 4617 4618 4619  
CONNECT 4608 4607  
CONNECT 4610 4609  
CONNECT 4611 4609  
CONNECT 4613 4612  
CONNECT 4615 4614  
CONNECT 4617 4616  
CONNECT 4618 4616  
CONNECT 4619 4616  
CONNECT 4607 4608 4609  
CONNECT 4614 4612 4615  
CONNECT 4622 4625 4620 4624 4623  
CONNECT 4625 4627 4629 4626 4622  
CONNECT 4629 4632 4630 4631 4625  
CONNECT 4621 4620  
CONNECT 4623 4622  
CONNECT 4624 4622  
CONNECT 4626 4625  
CONNECT 4628 4627  
CONNECT 4630 4629  
CONNECT 4631 4629  
CONNECT 4632 4629  
CONNECT 4620 4621 4622  
CONNECT 4627 4628 4625  
CONNECT 4635 4633 4637 4636 4638  
CONNECT 4638 4635 4642 4640 4639

CONNECT 4642 4638 4645 4643 4644  
CONNECT 4634 4633  
CONNECT 4636 4635  
CONNECT 4637 4635  
CONNECT 4639 4638  
CONNECT 4641 4640  
CONNECT 4643 4642  
CONNECT 4644 4642  
CONNECT 4645 4642  
CONNECT 4633 4634 4635  
CONNECT 4640 4641 4638  
CONNECT 4648 4651 4650 4646 4649  
CONNECT 4651 4655 4652 4648 4653  
CONNECT 4655 4658 4657 4656 4651  
CONNECT 4647 4646  
CONNECT 4649 4648  
CONNECT 4650 4648  
CONNECT 4652 4651  
CONNECT 4654 4653  
CONNECT 4656 4655  
CONNECT 4657 4655  
CONNECT 4658 4655  
CONNECT 4646 4647 4648  
CONNECT 4653 4654 4651  
CONNECT 4661 4659 4664 4663 4662  
CONNECT 4664 4665 4666 4661 4668  
CONNECT 4668 4664 4671 4669 4670  
CONNECT 4660 4659  
CONNECT 4662 4661  
CONNECT 4663 4661  
CONNECT 4665 4664  
CONNECT 4667 4666  
CONNECT 4669 4668  
CONNECT 4670 4668  
CONNECT 4671 4668  
CONNECT 4659 4661 4660  
CONNECT 4666 4664 4667  
CONNECT 4674 4675 4677 4676 4672  
CONNECT 4677 4681 4674 4679 4678  
CONNECT 4681 4683 4682 4684 4677  
CONNECT 4673 4672  
CONNECT 4675 4674  
CONNECT 4676 4674  
CONNECT 4678 4677  
CONNECT 4680 4679  
CONNECT 4682 4681  
CONNECT 4683 4681  
CONNECT 4684 4681  
CONNECT 4672 4673 4674  
CONNECT 4679 4680 4677  
CONNECT 4687 4688 4685 4689 4690  
CONNECT 4690 4687 4692 4694 4691  
CONNECT 4694 4696 4695 4697 4690  
CONNECT 4686 4685  
CONNECT 4688 4687  
CONNECT 4689 4687  
CONNECT 4691 4690



CONNECT 4693 4692  
CONNECT 4695 4694  
CONNECT 4696 4694  
CONNECT 4697 4694  
CONNECT 4685 4687 4686  
CONNECT 4692 4693 4690  
CONNECT 4700 4698 4702 4701 4703  
CONNECT 4703 4704 4700 4707 4705  
CONNECT 4707 4703 4708 4710 4709  
CONNECT 4699 4698  
CONNECT 4701 4700  
CONNECT 4702 4700  
CONNECT 4704 4703  
CONNECT 4706 4705  
CONNECT 4708 4707  
CONNECT 4709 4707  
CONNECT 4710 4707  
CONNECT 4698 4700 4699  
CONNECT 4705 4706 4703  
CONNECT 4713 4714 4715 4711 4716  
CONNECT 4716 4720 4718 4717 4713  
CONNECT 4720 4721 4722 4723 4716  
CONNECT 4712 4711  
CONNECT 4714 4713  
CONNECT 4715 4713  
CONNECT 4717 4716  
CONNECT 4719 4718  
CONNECT 4721 4720  
CONNECT 4722 4720  
CONNECT 4723 4720  
CONNECT 4711 4713 4712  
CONNECT 4718 4719 4716  
CONNECT 4726 4724 4729 4728 4727  
CONNECT 4729 4726 4731 4730 4733  
CONNECT 4733 4729 4734 4735 4736  
CONNECT 4725 4724  
CONNECT 4727 4726  
CONNECT 4728 4726  
CONNECT 4730 4729  
CONNECT 4732 4731  
CONNECT 4734 4733  
CONNECT 4735 4733  
CONNECT 4736 4733  
CONNECT 4724 4725 4726  
CONNECT 4731 4729 4732  
CONNECT 4739 4740 4742 4741 4737  
CONNECT 4742 4743 4739 4746 4744  
CONNECT 4746 4742 4749 4748 4747  
CONNECT 4738 4737  
CONNECT 4740 4739  
CONNECT 4741 4739  
CONNECT 4743 4742  
CONNECT 4745 4744  
CONNECT 4747 4746  
CONNECT 4748 4746  
CONNECT 4749 4746  
CONNECT 4737 4738 4739

CONNECT 4744 4742 4745  
CONNECT 4752 4753 4750 4754 4755  
CONNECT 4755 4752 4757 4759 4756  
CONNECT 4759 4760 4761 4762 4755  
CONNECT 4751 4750  
CONNECT 4753 4752  
CONNECT 4754 4752  
CONNECT 4756 4755  
CONNECT 4758 4757  
CONNECT 4760 4759  
CONNECT 4761 4759  
CONNECT 4762 4759  
CONNECT 4750 4752 4751  
CONNECT 4757 4758 4755  
CONNECT 4765 4763 4766 4768 4767  
CONNECT 4768 4772 4770 4769 4765  
CONNECT 4772 4775 4774 4768 4773  
CONNECT 4764 4763  
CONNECT 4766 4765  
CONNECT 4767 4765  
CONNECT 4769 4768  
CONNECT 4771 4770  
CONNECT 4773 4772  
CONNECT 4774 4772  
CONNECT 4775 4772  
CONNECT 4763 4764 4765  
CONNECT 4770 4771 4768  
CONNECT 4778 4780 4779 4776 4781  
CONNECT 4781 4785 4782 4783 4778  
CONNECT 4785 4788 4786 4787 4781  
CONNECT 4777 4776  
CONNECT 4779 4778  
CONNECT 4780 4778  
CONNECT 4782 4781  
CONNECT 4784 4783  
CONNECT 4786 4785  
CONNECT 4787 4785  
CONNECT 4788 4785  
CONNECT 4776 4777 4778  
CONNECT 4783 4784 4781  
CONNECT 4791 4793 4789 4794 4792  
CONNECT 4794 4796 4791 4795 4798  
CONNECT 4798 4794 4799 4801 4800  
CONNECT 4790 4789  
CONNECT 4792 4791  
CONNECT 4793 4791  
CONNECT 4795 4794  
CONNECT 4797 4796  
CONNECT 4799 4798  
CONNECT 4800 4798  
CONNECT 4801 4798  
CONNECT 4789 4791 4790  
CONNECT 4796 4794 4797  
CONNECT 4804 4806 4802 4807 4805  
CONNECT 4807 4809 4804 4811 4808  
CONNECT 4811 4813 4812 4814 4807  
CONNECT 4803 4802

CONNECT 4805 4804  
CONNECT 4806 4804  
CONNECT 4808 4807  
CONNECT 4810 4809  
CONNECT 4812 4811  
CONNECT 4813 4811  
CONNECT 4814 4811  
CONNECT 4802 4804 4803  
CONNECT 4809 4810 4807  
CONNECT 4817 4820 4819 4818 4815  
CONNECT 4820 4824 4822 4821 4817  
CONNECT 4824 4827 4826 4825 4820  
CONNECT 4816 4815  
CONNECT 4818 4817  
CONNECT 4819 4817  
CONNECT 4821 4820  
CONNECT 4823 4822  
CONNECT 4825 4824  
CONNECT 4826 4824  
CONNECT 4827 4824  
CONNECT 4815 4817 4816  
CONNECT 4822 4820 4823  
CONNECT 4830 4833 4832 4828 4831  
CONNECT 4833 4834 4837 4835 4830  
CONNECT 4837 4840 4838 4839 4833  
CONNECT 4829 4828  
CONNECT 4831 4830  
CONNECT 4832 4830  
CONNECT 4834 4833  
CONNECT 4836 4835  
CONNECT 4838 4837  
CONNECT 4839 4837  
CONNECT 4840 4837  
CONNECT 4828 4829 4830  
CONNECT 4835 4836 4833  
CONNECT 4843 4841 4844 4845 4846  
CONNECT 4846 4843 4848 4850 4847  
CONNECT 4850 4846 4852 4853 4851  
CONNECT 4842 4841  
CONNECT 4844 4843  
CONNECT 4845 4843  
CONNECT 4847 4846  
CONNECT 4849 4848  
CONNECT 4851 4850  
CONNECT 4852 4850  
CONNECT 4853 4850  
CONNECT 4841 4842 4843  
CONNECT 4848 4846 4849  
CONNECT 4856 4858 4859 4854 4857  
CONNECT 4859 4863 4856 4861 4860  
CONNECT 4863 4859 4864 4865 4866  
CONNECT 4855 4854  
CONNECT 4857 4856  
CONNECT 4858 4856  
CONNECT 4860 4859  
CONNECT 4862 4861  
CONNECT 4864 4863

CONNECT 4865 4863  
CONNECT 4866 4863  
CONNECT 4854 4856 4855  
CONNECT 4861 4862 4859  
CONNECT 4869 4872 4867 4870 4871  
CONNECT 4872 4873 4874 4869 4876  
CONNECT 4876 4872 4877 4878 4879  
CONNECT 4868 4867  
CONNECT 4870 4869  
CONNECT 4871 4869  
CONNECT 4873 4872  
CONNECT 4875 4874  
CONNECT 4877 4876  
CONNECT 4878 4876  
CONNECT 4879 4876  
CONNECT 4867 4868 4869  
CONNECT 4874 4872 4875  
CONNECT 4882 4885 4883 4884 4880  
CONNECT 4885 4887 4886 4882 4889  
CONNECT 4889 4885 4892 4890 4891  
CONNECT 4881 4880  
CONNECT 4883 4882  
CONNECT 4884 4882  
CONNECT 4886 4885  
CONNECT 4888 4887  
CONNECT 4890 4889  
CONNECT 4891 4889  
CONNECT 4892 4889  
CONNECT 4880 4882 4881  
CONNECT 4887 4885 4888  
CONNECT 4895 4893 4898 4897 4896  
CONNECT 4898 4902 4899 4900 4895  
CONNECT 4902 4904 4905 4903 4898  
CONNECT 4894 4893  
CONNECT 4896 4895  
CONNECT 4897 4895  
CONNECT 4899 4898  
CONNECT 4901 4900  
CONNECT 4903 4902  
CONNECT 4904 4902  
CONNECT 4905 4902  
CONNECT 4893 4894 4895  
CONNECT 4900 4901 4898  
CONNECT 4908 4906 4910 4909 4911  
CONNECT 4911 4915 4908 4913 4912  
CONNECT 4915 4918 4917 4911 4916  
CONNECT 4907 4906  
CONNECT 4909 4908  
CONNECT 4910 4908  
CONNECT 4912 4911  
CONNECT 4914 4913  
CONNECT 4916 4915  
CONNECT 4917 4915  
CONNECT 4918 4915  
CONNECT 4906 4907 4908  
CONNECT 4913 4914 4911  
CONNECT 4921 4923 4924 4922 4919

CONECT 4924 4921 4928 4926 4925  
CONECT 4928 4924 4929 4931 4930  
CONECT 4920 4919  
CONECT 4922 4921  
CONECT 4923 4921  
CONECT 4925 4924  
CONECT 4927 4926  
CONECT 4929 4928  
CONECT 4930 4928  
CONECT 4931 4928  
CONECT 4919 4921 4920  
CONECT 4926 4924 4927  
CONECT 4934 4935 4936 4937 4932  
CONECT 4937 4934 4939 4941 4938  
CONECT 4941 4937 4944 4942 4943  
CONECT 4933 4932  
CONECT 4935 4934  
CONECT 4936 4934  
CONECT 4938 4937  
CONECT 4940 4939  
CONECT 4942 4941  
CONECT 4943 4941  
CONECT 4944 4941  
CONECT 4932 4934 4933  
CONECT 4939 4937 4940  
CONECT 4947 4949 4950 4948 4945  
CONECT 4950 4952 4954 4951 4947  
CONECT 4954 4957 4950 4956 4955  
CONECT 4946 4945  
CONECT 4948 4947  
CONECT 4949 4947  
CONECT 4951 4950  
CONECT 4953 4952  
CONECT 4955 4954  
CONECT 4956 4954  
CONECT 4957 4954  
CONECT 4945 4946 4947  
CONECT 4952 4950 4953  
CONECT 4960 4961 4958 4963 4962  
CONECT 4963 4960 4965 4967 4964  
CONECT 4967 4970 4963 4968 4969  
CONECT 4959 4958  
CONECT 4961 4960  
CONECT 4962 4960  
CONECT 4964 4963  
CONECT 4966 4965  
CONECT 4968 4967  
CONECT 4969 4967  
CONECT 4970 4967  
CONECT 4958 4960 4959  
CONECT 4965 4963 4966  
CONECT 4973 4971 4974 4975 4976  
CONECT 4976 4980 4977 4978 4973  
CONECT 4980 4983 4982 4981 4976  
CONECT 4972 4971  
CONECT 4974 4973  
CONECT 4975 4973

CONNECT 4977 4976  
CONNECT 4979 4978  
CONNECT 4981 4980  
CONNECT 4982 4980  
CONNECT 4983 4980  
CONNECT 4971 4972 4973  
CONNECT 4978 4979 4976  
CONNECT 4986 4984 4988 4989 4987  
CONNECT 4989 4993 4990 4991 4986  
CONNECT 4993 4996 4995 4994 4989  
CONNECT 4985 4984  
CONNECT 4987 4986  
CONNECT 4988 4986  
CONNECT 4990 4989  
CONNECT 4992 4991  
CONNECT 4994 4993  
CONNECT 4995 4993  
CONNECT 4996 4993  
CONNECT 4984 4985 4986  
CONNECT 4991 4989 4992  
CONNECT 4999 5001 4997 5000 5002  
CONNECT 5002 4999 5003 5006 5004  
CONNECT 5006 5009 5008 5007 5002  
CONNECT 4998 4997  
CONNECT 5000 4999  
CONNECT 5001 4999  
CONNECT 5003 5002  
CONNECT 5005 5004  
CONNECT 5007 5006  
CONNECT 5008 5006  
CONNECT 5009 5006  
CONNECT 4997 4998 4999  
CONNECT 5004 5005 5002  
CONNECT 5012 5014 5013 5010 5015  
CONNECT 5015 5017 5012 5016 5019  
CONNECT 5019 5020 5021 5022 5015  
CONNECT 5011 5010  
CONNECT 5013 5012  
CONNECT 5014 5012  
CONNECT 5016 5015  
CONNECT 5018 5017  
CONNECT 5020 5019  
CONNECT 5021 5019  
CONNECT 5022 5019  
CONNECT 5010 5012 5011  
CONNECT 5017 5015 5018  
CONNECT 5025 5023 5026 5028 5027  
CONNECT 5028 5030 5032 5025 5029  
CONNECT 5032 5033 5034 5035 5028  
CONNECT 5024 5023  
CONNECT 5026 5025  
CONNECT 5027 5025  
CONNECT 5029 5028  
CONNECT 5031 5030  
CONNECT 5033 5032  
CONNECT 5034 5032  
CONNECT 5035 5032

CONNECT 5023 5024 5025  
CONNECT 5030 5031 5028  
CONNECT 5038 5036 5039 5040 5041  
CONNECT 5041 5043 5038 5045 5042  
CONNECT 5045 5046 5047 5041 5048  
CONNECT 5037 5036  
CONNECT 5039 5038  
CONNECT 5040 5038  
CONNECT 5042 5041  
CONNECT 5044 5043  
CONNECT 5046 5045  
CONNECT 5047 5045  
CONNECT 5048 5045  
CONNECT 5036 5037 5038  
CONNECT 5043 5041 5044  
CONNECT 5051 5054 5053 5052 5049  
CONNECT 5054 5058 5055 5056 5051  
CONNECT 5058 5060 5061 5059 5054  
CONNECT 5050 5049  
CONNECT 5052 5051  
CONNECT 5053 5051  
CONNECT 5055 5054  
CONNECT 5057 5056  
CONNECT 5059 5058  
CONNECT 5060 5058  
CONNECT 5061 5058  
CONNECT 5049 5050 5051  
CONNECT 5056 5057 5054  
CONNECT 5064 5065 5062 5066 5067  
CONNECT 5067 5064 5071 5069 5068  
CONNECT 5071 5072 5073 5074 5067  
CONNECT 5063 5062  
CONNECT 5065 5064  
CONNECT 5066 5064  
CONNECT 5068 5067  
CONNECT 5070 5069  
CONNECT 5072 5071  
CONNECT 5073 5071  
CONNECT 5074 5071  
CONNECT 5062 5064 5063  
CONNECT 5069 5067 5070  
CONNECT 5077 5075 5078 5080 5079  
CONNECT 5080 5084 5077 5082 5081  
CONNECT 5084 5080 5086 5087 5085  
CONNECT 5076 5075  
CONNECT 5078 5077  
CONNECT 5079 5077  
CONNECT 5081 5080  
CONNECT 5083 5082  
CONNECT 5085 5084  
CONNECT 5086 5084  
CONNECT 5087 5084  
CONNECT 5075 5077 5076  
CONNECT 5082 5080 5083  
CONNECT 5090 5091 5092 5093 5088  
CONNECT 5093 5095 5094 5097 5090  
CONNECT 5097 5093 5099 5100 5098

CONNECT 5089 5088  
CONNECT 5091 5090  
CONNECT 5092 5090  
CONNECT 5094 5093  
CONNECT 5096 5095  
CONNECT 5098 5097  
CONNECT 5099 5097  
CONNECT 5100 5097  
CONNECT 5088 5089 5090  
CONNECT 5095 5093 5096  
CONNECT 5103 5106 5105 5104 5101  
CONNECT 5106 5107 5108 5103 5110  
CONNECT 5110 5112 5106 5111 5113  
CONNECT 5102 5101  
CONNECT 5104 5103  
CONNECT 5105 5103  
CONNECT 5107 5106  
CONNECT 5109 5108  
CONNECT 5111 5110  
CONNECT 5112 5110  
CONNECT 5113 5110  
CONNECT 5101 5102 5103  
CONNECT 5108 5106 5109  
CONNECT 5116 5119 5118 5114 5117  
CONNECT 5119 5123 5120 5116 5121  
CONNECT 5123 5119 5124 5125 5126  
CONNECT 5115 5114  
CONNECT 5117 5116  
CONNECT 5118 5116  
CONNECT 5120 5119  
CONNECT 5122 5121  
CONNECT 5124 5123  
CONNECT 5125 5123  
CONNECT 5126 5123  
CONNECT 5114 5115 5116  
CONNECT 5121 5119 5122  
CONNECT 5129 5132 5130 5131 5127  
CONNECT 5132 5134 5136 5133 5129  
CONNECT 5136 5138 5132 5137 5139  
CONNECT 5128 5127  
CONNECT 5130 5129  
CONNECT 5131 5129  
CONNECT 5133 5132  
CONNECT 5135 5134  
CONNECT 5137 5136  
CONNECT 5138 5136  
CONNECT 5139 5136  
CONNECT 5127 5129 5128  
CONNECT 5134 5132 5135  
CONNECT 5142 5143 5144 5145 5140  
CONNECT 5145 5147 5142 5146 5149  
CONNECT 5149 5152 5150 5151 5145  
CONNECT 5141 5140  
CONNECT 5143 5142  
CONNECT 5144 5142  
CONNECT 5146 5145  
CONNECT 5148 5147



CONNECT 5150 5149  
CONNECT 5151 5149  
CONNECT 5152 5149  
CONNECT 5140 5141 5142  
CONNECT 5147 5145 5148  
CONNECT 5155 5153 5158 5156 5157  
CONNECT 5158 5159 5155 5160 5162  
CONNECT 5162 5164 5165 5163 5158  
CONNECT 5154 5153  
CONNECT 5156 5155  
CONNECT 5157 5155  
CONNECT 5159 5158  
CONNECT 5161 5160  
CONNECT 5163 5162  
CONNECT 5164 5162  
CONNECT 5165 5162  
CONNECT 5153 5154 5155  
CONNECT 5160 5158 5161  
CONNECT 5168 5166 5170 5171 5169  
CONNECT 5171 5173 5172 5175 5168  
CONNECT 5175 5171 5176 5177 5178  
CONNECT 5167 5166  
CONNECT 5169 5168  
CONNECT 5170 5168  
CONNECT 5172 5171  
CONNECT 5174 5173  
CONNECT 5176 5175  
CONNECT 5177 5175  
CONNECT 5178 5175  
CONNECT 5166 5168 5167  
CONNECT 5173 5171 5174  
CONNECT 5181 5183 5182 5179 5184  
CONNECT 5184 5185 5181 5188 5186  
CONNECT 5188 5190 5189 5184 5191  
CONNECT 5180 5179  
CONNECT 5182 5181  
CONNECT 5183 5181  
CONNECT 5185 5184  
CONNECT 5187 5186  
CONNECT 5189 5188  
CONNECT 5190 5188  
CONNECT 5191 5188  
CONNECT 5179 5181 5180  
CONNECT 5186 5187 5184  
CONNECT 5194 5195 5196 5197 5192  
CONNECT 5197 5194 5198 5199 5201  
CONNECT 5201 5204 5203 5197 5202  
CONNECT 5193 5192  
CONNECT 5195 5194  
CONNECT 5196 5194  
CONNECT 5198 5197  
CONNECT 5200 5199  
CONNECT 5202 5201  
CONNECT 5203 5201  
CONNECT 5204 5201  
CONNECT 5192 5194 5193  
CONNECT 5199 5197 5200

CONNECT 5207 5205 5208 5209 5210  
CONNECT 5210 5211 5207 5214 5212  
CONNECT 5214 5215 5210 5216 5217  
CONNECT 5206 5205  
CONNECT 5208 5207  
CONNECT 5209 5207  
CONNECT 5211 5210  
CONNECT 5213 5212  
CONNECT 5215 5214  
CONNECT 5216 5214  
CONNECT 5217 5214  
CONNECT 5205 5206 5207  
CONNECT 5212 5210 5213  
CONNECT 5220 5223 5218 5221 5222  
CONNECT 5223 5224 5225 5227 5220  
CONNECT 5227 5228 5230 5223 5229  
CONNECT 5219 5218  
CONNECT 5221 5220  
CONNECT 5222 5220  
CONNECT 5224 5223  
CONNECT 5226 5225  
CONNECT 5228 5227  
CONNECT 5229 5227  
CONNECT 5230 5227  
CONNECT 5218 5219 5220  
CONNECT 5225 5226 5223  
CONNECT 5233 5231 5235 5234 5236  
CONNECT 5236 5240 5238 5237 5233  
CONNECT 5240 5241 5242 5243 5236  
CONNECT 5232 5231  
CONNECT 5234 5233  
CONNECT 5235 5233  
CONNECT 5237 5236  
CONNECT 5239 5238  
CONNECT 5241 5240  
CONNECT 5242 5240  
CONNECT 5243 5240  
CONNECT 5231 5232 5233  
CONNECT 5238 5239 5236  
CONNECT 5246 5248 5247 5244 5249  
CONNECT 5249 5246 5251 5250 5253  
CONNECT 5253 5256 5255 5254 5249  
CONNECT 5245 5244  
CONNECT 5247 5246  
CONNECT 5248 5246  
CONNECT 5250 5249  
CONNECT 5252 5251  
CONNECT 5254 5253  
CONNECT 5255 5253  
CONNECT 5256 5253  
CONNECT 5244 5246 5245  
CONNECT 5251 5252 5249  
CONNECT 5259 5262 5260 5261 5257  
CONNECT 5262 5259 5263 5264 5266  
CONNECT 5266 5262 5267 5269 5268  
CONNECT 5258 5257  
CONNECT 5260 5259

CONNECT 5261 5259  
CONNECT 5263 5262  
CONNECT 5265 5264  
CONNECT 5267 5266  
CONNECT 5268 5266  
CONNECT 5269 5266  
CONNECT 5257 5259 5258  
CONNECT 5264 5262 5265  
CONNECT 5272 5273 5275 5274 5270  
CONNECT 5275 5272 5279 5277 5276  
CONNECT 5279 5275 5280 5281 5282  
CONNECT 5271 5270  
CONNECT 5273 5272  
CONNECT 5274 5272  
CONNECT 5276 5275  
CONNECT 5278 5277  
CONNECT 5280 5279  
CONNECT 5281 5279  
CONNECT 5282 5279  
CONNECT 5270 5272 5271  
CONNECT 5277 5278 5275  
CONNECT 5285 5283 5286 5288 5287  
CONNECT 5288 5285 5289 5290 5292  
CONNECT 5292 5295 5293 5294 5288  
CONNECT 5284 5283  
CONNECT 5286 5285  
CONNECT 5287 5285  
CONNECT 5289 5288  
CONNECT 5291 5290  
CONNECT 5293 5292  
CONNECT 5294 5292  
CONNECT 5295 5292  
CONNECT 5283 5284 5285  
CONNECT 5290 5291 5288  
CONNECT 5298 5299 5301 5300 5296  
CONNECT 5301 5303 5302 5305 5298  
CONNECT 5305 5306 5301 5308 5307  
CONNECT 5297 5296  
CONNECT 5299 5298  
CONNECT 5300 5298  
CONNECT 5302 5301  
CONNECT 5304 5303  
CONNECT 5306 5305  
CONNECT 5307 5305  
CONNECT 5308 5305  
CONNECT 5296 5298 5297  
CONNECT 5303 5301 5304  
CONNECT 5311 5309 5312 5313 5314  
CONNECT 5314 5311 5318 5315 5316  
CONNECT 5318 5314 5319 5321 5320  
CONNECT 5310 5309  
CONNECT 5312 5311  
CONNECT 5313 5311  
CONNECT 5315 5314  
CONNECT 5317 5316  
CONNECT 5319 5318  
CONNECT 5320 5318

CONNECT 5321 5318  
CONNECT 5309 5311 5310  
CONNECT 5316 5314 5317  
CONNECT 5324 5326 5325 5322 5327  
CONNECT 5327 5329 5331 5328 5324  
CONNECT 5331 5333 5334 5332 5327  
CONNECT 5323 5322  
CONNECT 5325 5324  
CONNECT 5326 5324  
CONNECT 5328 5327  
CONNECT 5330 5329  
CONNECT 5332 5331  
CONNECT 5333 5331  
CONNECT 5334 5331  
CONNECT 5322 5323 5324  
CONNECT 5329 5330 5327  
CONNECT 5337 5340 5335 5338 5339  
CONNECT 5340 5342 5341 5337 5344  
CONNECT 5344 5340 5347 5346 5345  
CONNECT 5336 5335  
CONNECT 5338 5337  
CONNECT 5339 5337  
CONNECT 5341 5340  
CONNECT 5343 5342  
CONNECT 5345 5344  
CONNECT 5346 5344  
CONNECT 5347 5344  
CONNECT 5335 5336 5337  
CONNECT 5342 5340 5343  
CONNECT 5350 5348 5352 5351 5353  
CONNECT 5353 5357 5354 5355 5350  
CONNECT 5357 5360 5359 5358 5353  
CONNECT 5349 5348  
CONNECT 5351 5350  
CONNECT 5352 5350  
CONNECT 5354 5353  
CONNECT 5356 5355  
CONNECT 5358 5357  
CONNECT 5359 5357  
CONNECT 5360 5357  
CONNECT 5348 5349 5350  
CONNECT 5355 5356 5353  
CONNECT 5363 5361 5364 5366 5365  
CONNECT 5366 5363 5368 5367 5370  
CONNECT 5370 5366 5373 5371 5372  
CONNECT 5362 5361  
CONNECT 5364 5363  
CONNECT 5365 5363  
CONNECT 5367 5366  
CONNECT 5369 5368  
CONNECT 5371 5370  
CONNECT 5372 5370  
CONNECT 5373 5370  
CONNECT 5361 5362 5363  
CONNECT 5368 5366 5369  
CONNECT 5376 5379 5374 5377 5378  
CONNECT 5379 5383 5376 5381 5380

CONNECT 5383 5386 5379 5384 5385  
CONNECT 5375 5374  
CONNECT 5377 5376  
CONNECT 5378 5376  
CONNECT 5380 5379  
CONNECT 5382 5381  
CONNECT 5384 5383  
CONNECT 5385 5383  
CONNECT 5386 5383  
CONNECT 5374 5375 5376  
CONNECT 5381 5379 5382  
CONNECT 5389 5392 5391 5387 5390  
CONNECT 5392 5389 5393 5394 5396  
CONNECT 5396 5392 5397 5398 5399  
CONNECT 5388 5387  
CONNECT 5390 5389  
CONNECT 5391 5389  
CONNECT 5393 5392  
CONNECT 5395 5394  
CONNECT 5397 5396  
CONNECT 5398 5396  
CONNECT 5399 5396  
CONNECT 5387 5389 5388  
CONNECT 5394 5392 5395  
CONNECT 5402 5400 5403 5404 5405  
CONNECT 5405 5402 5409 5407 5406  
CONNECT 5409 5412 5410 5405 5411  
CONNECT 5401 5400  
CONNECT 5403 5402  
CONNECT 5404 5402  
CONNECT 5406 5405  
CONNECT 5408 5407  
CONNECT 5410 5409  
CONNECT 5411 5409  
CONNECT 5412 5409  
CONNECT 5400 5401 5402  
CONNECT 5407 5408 5405  
CONNECT 5415 5418 5416 5417 5413  
CONNECT 5418 5420 5422 5419 5415  
CONNECT 5422 5424 5418 5425 5423  
CONNECT 5414 5413  
CONNECT 5416 5415  
CONNECT 5417 5415  
CONNECT 5419 5418  
CONNECT 5421 5420  
CONNECT 5423 5422  
CONNECT 5424 5422  
CONNECT 5425 5422  
CONNECT 5413 5414 5415  
CONNECT 5420 5421 5418  
CONNECT 5428 5426 5429 5430 5431  
CONNECT 5431 5428 5433 5435 5432  
CONNECT 5435 5436 5437 5438 5431  
CONNECT 5427 5426  
CONNECT 5429 5428  
CONNECT 5430 5428  
CONNECT 5432 5431

CONNECT 5434 5433  
CONNECT 5436 5435  
CONNECT 5437 5435  
CONNECT 5438 5435  
CONNECT 5426 5428 5427  
CONNECT 5433 5431 5434  
CONNECT 5441 5439 5443 5444 5442  
CONNECT 5444 5448 5446 5445 5441  
CONNECT 5448 5444 5450 5449 5451  
CONNECT 5440 5439  
CONNECT 5442 5441  
CONNECT 5443 5441  
CONNECT 5445 5444  
CONNECT 5447 5446  
CONNECT 5449 5448  
CONNECT 5450 5448  
CONNECT 5451 5448  
CONNECT 5439 5440 5441  
CONNECT 5446 5447 5444  
CONNECT 5454 5456 5455 5457 5452  
CONNECT 5457 5454 5461 5459 5458  
CONNECT 5461 5464 5457 5463 5462  
CONNECT 5453 5452  
CONNECT 5455 5454  
CONNECT 5456 5454  
CONNECT 5458 5457  
CONNECT 5460 5459  
CONNECT 5462 5461  
CONNECT 5463 5461  
CONNECT 5464 5461  
CONNECT 5452 5454 5453  
CONNECT 5459 5460 5457  
CONNECT 5467 5468 5470 5469 5465  
CONNECT 5470 5467 5472 5471 5474  
CONNECT 5474 5470 5476 5475 5477  
CONNECT 5466 5465  
CONNECT 5468 5467  
CONNECT 5469 5467  
CONNECT 5471 5470  
CONNECT 5473 5472  
CONNECT 5475 5474  
CONNECT 5476 5474  
CONNECT 5477 5474  
CONNECT 5465 5467 5466  
CONNECT 5472 5470 5473  
CONNECT 5480 5481 5483 5482 5478  
CONNECT 5483 5480 5485 5484 5487  
CONNECT 5487 5483 5488 5490 5489  
CONNECT 5479 5478  
CONNECT 5481 5480  
CONNECT 5482 5480  
CONNECT 5484 5483  
CONNECT 5486 5485  
CONNECT 5488 5487  
CONNECT 5489 5487  
CONNECT 5490 5487  
CONNECT 5478 5480 5479

CONNECT 5485 5483 5486  
CONNECT 5493 5491 5496 5495 5494  
CONNECT 5496 5497 5493 5498 5500  
CONNECT 5500 5496 5503 5501 5502  
CONNECT 5492 5491  
CONNECT 5494 5493  
CONNECT 5495 5493  
CONNECT 5497 5496  
CONNECT 5499 5498  
CONNECT 5501 5500  
CONNECT 5502 5500  
CONNECT 5503 5500  
CONNECT 5491 5492 5493  
CONNECT 5498 5496 5499  
CONNECT 5506 5504 5509 5507 5508  
CONNECT 5509 5511 5513 5510 5506  
CONNECT 5513 5515 5516 5514 5509  
CONNECT 5505 5504  
CONNECT 5507 5506  
CONNECT 5508 5506  
CONNECT 5510 5509  
CONNECT 5512 5511  
CONNECT 5514 5513  
CONNECT 5515 5513  
CONNECT 5516 5513  
CONNECT 5504 5505 5506  
CONNECT 5511 5512 5509  
CONNECT 5519 5522 5521 5520 5517  
CONNECT 5522 5523 5524 5526 5519  
CONNECT 5526 5529 5528 5527 5522  
CONNECT 5518 5517  
CONNECT 5520 5519  
CONNECT 5521 5519  
CONNECT 5523 5522  
CONNECT 5525 5524  
CONNECT 5527 5526  
CONNECT 5528 5526  
CONNECT 5529 5526  
CONNECT 5517 5518 5519  
CONNECT 5524 5525 5522  
CONNECT 5532 5533 5530 5534 5535  
CONNECT 5535 5532 5539 5536 5537  
CONNECT 5539 5540 5541 5542 5535  
CONNECT 5531 5530  
CONNECT 5533 5532  
CONNECT 5534 5532  
CONNECT 5536 5535  
CONNECT 5538 5537  
CONNECT 5540 5539  
CONNECT 5541 5539  
CONNECT 5542 5539  
CONNECT 5530 5532 5531  
CONNECT 5537 5538 5535  
CONNECT 5545 5548 5546 5547 5543  
CONNECT 5548 5545 5552 5549 5550  
CONNECT 5552 5554 5555 5548 5553  
CONNECT 5544 5543

CONNECT 5546 5545  
CONNECT 5547 5545  
CONNECT 5549 5548  
CONNECT 5551 5550  
CONNECT 5553 5552  
CONNECT 5554 5552  
CONNECT 5555 5552  
CONNECT 5543 5545 5544  
CONNECT 5550 5548 5551  
CONNECT 5558 5556 5561 5559 5560  
CONNECT 5561 5558 5563 5562 5565  
CONNECT 5565 5568 5561 5567 5566  
CONNECT 5557 5556  
CONNECT 5559 5558  
CONNECT 5560 5558  
CONNECT 5562 5561  
CONNECT 5564 5563  
CONNECT 5566 5565  
CONNECT 5567 5565  
CONNECT 5568 5565  
CONNECT 5556 5557 5558  
CONNECT 5563 5561 5564  
CONNECT 5571 5572 5574 5569 5573  
CONNECT 5574 5578 5576 5571 5575  
CONNECT 5578 5581 5579 5580 5574  
CONNECT 5570 5569  
CONNECT 5572 5571  
CONNECT 5573 5571  
CONNECT 5575 5574  
CONNECT 5577 5576  
CONNECT 5579 5578  
CONNECT 5580 5578  
CONNECT 5581 5578  
CONNECT 5569 5571 5570  
CONNECT 5576 5577 5574  
CONNECT 5584 5582 5587 5585 5586  
CONNECT 5587 5584 5588 5591 5589  
CONNECT 5591 5587 5592 5594 5593  
CONNECT 5583 5582  
CONNECT 5585 5584  
CONNECT 5586 5584  
CONNECT 5588 5587  
CONNECT 5590 5589  
CONNECT 5592 5591  
CONNECT 5593 5591  
CONNECT 5594 5591  
CONNECT 5582 5583 5584  
CONNECT 5589 5587 5590  
CONNECT 5597 5595 5599 5598 5600  
CONNECT 5600 5597 5601 5602 5604  
CONNECT 5604 5607 5605 5606 5600  
CONNECT 5596 5595  
CONNECT 5598 5597  
CONNECT 5599 5597  
CONNECT 5601 5600  
CONNECT 5603 5602  
CONNECT 5605 5604



CONNECT 5606 5604  
CONNECT 5607 5604  
CONNECT 5595 5596 5597  
CONNECT 5602 5600 5603  
CONNECT 5610 5611 5608 5612 5613  
CONNECT 5613 5615 5614 5617 5610  
CONNECT 5617 5619 5618 5620 5613  
CONNECT 5609 5608  
CONNECT 5611 5610  
CONNECT 5612 5610  
CONNECT 5614 5613  
CONNECT 5616 5615  
CONNECT 5618 5617  
CONNECT 5619 5617  
CONNECT 5620 5617  
CONNECT 5608 5610 5609  
CONNECT 5615 5616 5613  
CONNECT 5623 5624 5625 5621 5626  
CONNECT 5626 5627 5623 5628 5630  
CONNECT 5630 5633 5632 5626 5631  
CONNECT 5622 5621  
CONNECT 5624 5623  
CONNECT 5625 5623  
CONNECT 5627 5626  
CONNECT 5629 5628  
CONNECT 5631 5630  
CONNECT 5632 5630  
CONNECT 5633 5630  
CONNECT 5621 5623 5622  
CONNECT 5628 5626 5629  
CONNECT 5636 5637 5639 5634 5638  
CONNECT 5639 5641 5636 5643 5640  
CONNECT 5643 5644 5639 5645 5646  
CONNECT 5635 5634  
CONNECT 5637 5636  
CONNECT 5638 5636  
CONNECT 5640 5639  
CONNECT 5642 5641  
CONNECT 5644 5643  
CONNECT 5645 5643  
CONNECT 5646 5643  
CONNECT 5634 5636 5635  
CONNECT 5641 5642 5639  
CONNECT 5649 5652 5647 5651 5650  
CONNECT 5652 5656 5654 5653 5649  
CONNECT 5656 5657 5659 5658 5652  
CONNECT 5648 5647  
CONNECT 5650 5649  
CONNECT 5651 5649  
CONNECT 5653 5652  
CONNECT 5655 5654  
CONNECT 5657 5656  
CONNECT 5658 5656  
CONNECT 5659 5656  
CONNECT 5647 5648 5649  
CONNECT 5654 5655 5652  
CONNECT 5662 5663 5660 5665 5664

CONNECT 5665 5666 5662 5667 5669  
CONNECT 5669 5672 5665 5670 5671  
CONNECT 5661 5660  
CONNECT 5663 5662  
CONNECT 5664 5662  
CONNECT 5666 5665  
CONNECT 5668 5667  
CONNECT 5670 5669  
CONNECT 5671 5669  
CONNECT 5672 5669  
CONNECT 5660 5662 5661  
CONNECT 5667 5665 5668  
CONNECT 5675 5678 5673 5677 5676  
CONNECT 5678 5682 5675 5680 5679  
CONNECT 5682 5684 5678 5685 5683  
CONNECT 5674 5673  
CONNECT 5676 5675  
CONNECT 5677 5675  
CONNECT 5679 5678  
CONNECT 5681 5680  
CONNECT 5683 5682  
CONNECT 5684 5682  
CONNECT 5685 5682  
CONNECT 5673 5674 5675  
CONNECT 5680 5678 5681  
CONNECT 5688 5689 5690 5691 5686  
CONNECT 5691 5688 5692 5693 5695  
CONNECT 5695 5696 5697 5698 5691  
CONNECT 5687 5686  
CONNECT 5689 5688  
CONNECT 5690 5688  
CONNECT 5692 5691  
CONNECT 5694 5693  
CONNECT 5696 5695  
CONNECT 5697 5695  
CONNECT 5698 5695  
CONNECT 5686 5687 5688  
CONNECT 5693 5691 5694  
CONNECT 5701 5699 5702 5703 5704  
CONNECT 5704 5701 5706 5705 5708  
CONNECT 5708 5710 5711 5709 5704  
CONNECT 5700 5699  
CONNECT 5702 5701  
CONNECT 5703 5701  
CONNECT 5705 5704  
CONNECT 5707 5706  
CONNECT 5709 5708  
CONNECT 5710 5708  
CONNECT 5711 5708  
CONNECT 5699 5700 5701  
CONNECT 5706 5704 5707  
CONNECT 5714 5716 5715 5717 5712  
CONNECT 5717 5719 5718 5721 5714  
CONNECT 5721 5717 5722 5723 5724  
CONNECT 5713 5712  
CONNECT 5715 5714  
CONNECT 5716 5714

CONNECT 5718 5717  
CONNECT 5720 5719  
CONNECT 5722 5721  
CONNECT 5723 5721  
CONNECT 5724 5721  
CONNECT 5712 5713 5714  
CONNECT 5719 5717 5720  
CONNECT 5727 5730 5728 5725 5729  
CONNECT 5730 5732 5731 5734 5727  
CONNECT 5734 5737 5736 5730 5735  
CONNECT 5726 5725  
CONNECT 5728 5727  
CONNECT 5729 5727  
CONNECT 5731 5730  
CONNECT 5733 5732  
CONNECT 5735 5734  
CONNECT 5736 5734  
CONNECT 5737 5734  
CONNECT 5725 5727 5726  
CONNECT 5732 5733 5730  
CONNECT 5740 5742 5741 5743 5738  
CONNECT 5743 5747 5745 5740 5744  
CONNECT 5747 5748 5749 5750 5743  
CONNECT 5739 5738  
CONNECT 5741 5740  
CONNECT 5742 5740  
CONNECT 5744 5743  
CONNECT 5746 5745  
CONNECT 5748 5747  
CONNECT 5749 5747  
CONNECT 5750 5747  
CONNECT 5738 5739 5740  
CONNECT 5745 5746 5743  
CONNECT 5753 5756 5751 5755 5754  
CONNECT 5756 5760 5757 5758 5753  
CONNECT 5760 5762 5756 5761 5763  
CONNECT 5752 5751  
CONNECT 5754 5753  
CONNECT 5755 5753  
CONNECT 5757 5756  
CONNECT 5759 5758  
CONNECT 5761 5760  
CONNECT 5762 5760  
CONNECT 5763 5760  
CONNECT 5751 5752 5753  
CONNECT 5758 5759 5756  
CONNECT 5766 5767 5769 5768 5764  
CONNECT 5769 5770 5771 5773 5766  
CONNECT 5773 5774 5769 5775 5776  
CONNECT 5765 5764  
CONNECT 5767 5766  
CONNECT 5768 5766  
CONNECT 5770 5769  
CONNECT 5772 5771  
CONNECT 5774 5773  
CONNECT 5775 5773  
CONNECT 5776 5773

CONNECT 5764 5765 5766  
CONNECT 5771 5772 5769  
CONNECT 5779 5781 5780 5777 5782  
CONNECT 5782 5779 5783 5784 5786  
CONNECT 5786 5782 5787 5788 5789  
CONNECT 5778 5777  
CONNECT 5780 5779  
CONNECT 5781 5779  
CONNECT 5783 5782  
CONNECT 5785 5784  
CONNECT 5787 5786  
CONNECT 5788 5786  
CONNECT 5789 5786  
CONNECT 5777 5779 5778  
CONNECT 5784 5782 5785  
CONNECT 5792 5793 5790 5794 5795  
CONNECT 5795 5796 5797 5799 5792  
CONNECT 5799 5801 5802 5800 5795  
CONNECT 5791 5790  
CONNECT 5793 5792  
CONNECT 5794 5792  
CONNECT 5796 5795  
CONNECT 5798 5797  
CONNECT 5800 5799  
CONNECT 5801 5799  
CONNECT 5802 5799  
CONNECT 5790 5791 5792  
CONNECT 5797 5795 5798  
CONNECT 5805 5808 5803 5806 5807  
CONNECT 5808 5810 5812 5809 5805  
CONNECT 5812 5813 5815 5808 5814  
CONNECT 5804 5803  
CONNECT 5806 5805  
CONNECT 5807 5805  
CONNECT 5809 5808  
CONNECT 5811 5810  
CONNECT 5813 5812  
CONNECT 5814 5812  
CONNECT 5815 5812  
CONNECT 5803 5804 5805  
CONNECT 5810 5811 5808  
CONNECT 5818 5820 5816 5819 5821  
CONNECT 5821 5822 5818 5825 5823  
CONNECT 5825 5826 5821 5828 5827  
CONNECT 5817 5816  
CONNECT 5819 5818  
CONNECT 5820 5818  
CONNECT 5822 5821  
CONNECT 5824 5823  
CONNECT 5826 5825  
CONNECT 5827 5825  
CONNECT 5828 5825  
CONNECT 5816 5818 5817  
CONNECT 5823 5824 5821  
CONNECT 5831 5834 5833 5829 5832  
CONNECT 5834 5835 5836 5838 5831  
CONNECT 5838 5834 5841 5840 5839

CONNECT 5830 5829  
CONNECT 5832 5831  
CONNECT 5833 5831  
CONNECT 5835 5834  
CONNECT 5837 5836  
CONNECT 5839 5838  
CONNECT 5840 5838  
CONNECT 5841 5838  
CONNECT 5829 5831 5830  
CONNECT 5836 5834 5837  
CONNECT 5844 5845 5842 5847 5846  
CONNECT 5847 5851 5848 5844 5849  
CONNECT 5851 5853 5852 5854 5847  
CONNECT 5843 5842  
CONNECT 5845 5844  
CONNECT 5846 5844  
CONNECT 5848 5847  
CONNECT 5850 5849  
CONNECT 5852 5851  
CONNECT 5853 5851  
CONNECT 5854 5851  
CONNECT 5842 5843 5844  
CONNECT 5849 5850 5847  
CONNECT 5857 5858 5860 5859 5855  
CONNECT 5860 5862 5857 5864 5861  
CONNECT 5864 5867 5860 5865 5866  
CONNECT 5856 5855  
CONNECT 5858 5857  
CONNECT 5859 5857  
CONNECT 5861 5860  
CONNECT 5863 5862  
CONNECT 5865 5864  
CONNECT 5866 5864  
CONNECT 5867 5864  
CONNECT 5855 5857 5856  
CONNECT 5862 5863 5860  
CONNECT 5870 5868 5872 5871 5873  
CONNECT 5873 5877 5875 5874 5870  
CONNECT 5877 5880 5879 5878 5873  
CONNECT 5869 5868  
CONNECT 5871 5870  
CONNECT 5872 5870  
CONNECT 5874 5873  
CONNECT 5876 5875  
CONNECT 5878 5877  
CONNECT 5879 5877  
CONNECT 5880 5877  
CONNECT 5868 5870 5869  
CONNECT 5875 5876 5873  
CONNECT 5883 5886 5884 5885 5881  
CONNECT 5886 5890 5888 5887 5883  
CONNECT 5890 5891 5886 5892 5893  
CONNECT 5882 5881  
CONNECT 5884 5883  
CONNECT 5885 5883  
CONNECT 5887 5886  
CONNECT 5889 5888

CONNECT 5891 5890  
CONNECT 5892 5890  
CONNECT 5893 5890  
CONNECT 5881 5883 5882  
CONNECT 5888 5889 5886  
CONNECT 5896 5898 5899 5897 5894  
CONNECT 5899 5903 5901 5900 5896  
CONNECT 5903 5904 5905 5906 5899  
CONNECT 5895 5894  
CONNECT 5897 5896  
CONNECT 5898 5896  
CONNECT 5900 5899  
CONNECT 5902 5901  
CONNECT 5904 5903  
CONNECT 5905 5903  
CONNECT 5906 5903  
CONNECT 5894 5896 5895  
CONNECT 5901 5902 5899  
CONNECT 5909 5912 5911 5910 5907  
CONNECT 5912 5916 5913 5914 5909  
CONNECT 5916 5919 5918 5917 5912  
CONNECT 5908 5907  
CONNECT 5910 5909  
CONNECT 5911 5909  
CONNECT 5913 5912  
CONNECT 5915 5914  
CONNECT 5917 5916  
CONNECT 5918 5916  
CONNECT 5919 5916  
CONNECT 5907 5909 5908  
CONNECT 5914 5912 5915  
CONNECT 5922 5925 5923 5924 5920  
CONNECT 5925 5929 5926 5927 5922  
CONNECT 5929 5931 5932 5930 5925  
CONNECT 5921 5920  
CONNECT 5923 5922  
CONNECT 5924 5922  
CONNECT 5926 5925  
CONNECT 5928 5927  
CONNECT 5930 5929  
CONNECT 5931 5929  
CONNECT 5932 5929  
CONNECT 5920 5921 5922  
CONNECT 5927 5928 5925  
CONNECT 5935 5936 5933 5938 5937  
CONNECT 5938 5939 5942 5940 5935  
CONNECT 5942 5945 5944 5943 5938  
CONNECT 5934 5933  
CONNECT 5936 5935  
CONNECT 5937 5935  
CONNECT 5939 5938  
CONNECT 5941 5940  
CONNECT 5943 5942  
CONNECT 5944 5942  
CONNECT 5945 5942  
CONNECT 5933 5935 5934  
CONNECT 5940 5941 5938

CONNECT 5948 5951 5950 5949 5946  
CONNECT 5951 5955 5953 5952 5948  
CONNECT 5955 5958 5957 5956 5951  
CONNECT 5947 5946  
CONNECT 5949 5948  
CONNECT 5950 5948  
CONNECT 5952 5951  
CONNECT 5954 5953  
CONNECT 5956 5955  
CONNECT 5957 5955  
CONNECT 5958 5955  
CONNECT 5946 5948 5947  
CONNECT 5953 5954 5951  
CONNECT 5961 5964 5963 5962 5959  
CONNECT 5964 5968 5966 5965 5961  
CONNECT 5968 5971 5970 5969 5964  
CONNECT 5960 5959  
CONNECT 5962 5961  
CONNECT 5963 5961  
CONNECT 5965 5964  
CONNECT 5967 5966  
CONNECT 5969 5968  
CONNECT 5970 5968  
CONNECT 5971 5968  
CONNECT 5959 5961 5960  
CONNECT 5966 5967 5964  
CONNECT 5974 5977 5976 5975 5972  
CONNECT 5977 5981 5979 5978 5974  
CONNECT 5981 5984 5983 5982 5977  
CONNECT 5973 5972  
CONNECT 5975 5974  
CONNECT 5976 5974  
CONNECT 5978 5977  
CONNECT 5980 5979  
CONNECT 5982 5981  
CONNECT 5983 5981  
CONNECT 5984 5981  
CONNECT 5972 5974 5973  
CONNECT 5979 5980 5977  
CONNECT 5987 5990 5989 5988 5985  
CONNECT 5990 5994 5992 5991 5987  
CONNECT 5994 5997 5996 5995 5990  
CONNECT 5986 5985  
CONNECT 5988 5987  
CONNECT 5989 5987  
CONNECT 5991 5990  
CONNECT 5993 5992  
CONNECT 5995 5994  
CONNECT 5996 5994  
CONNECT 5997 5994  
CONNECT 5985 5987 5986  
CONNECT 5992 5993 5990  
CONNECT 6000 6001 6002 6003 5998  
CONNECT 6003 6000 6004 6005 6007  
CONNECT 6007 6008 6009 6010 6003  
CONNECT 5999 5998  
CONNECT 6001 6000

CONNECT 6002 6000  
CONNECT 6004 6003  
CONNECT 6006 6005  
CONNECT 6008 6007  
CONNECT 6009 6007  
CONNECT 6010 6007  
CONNECT 5998 6000 5999  
CONNECT 6005 6003 6006  
CONNECT 6013 6011 6014 6015 6016  
CONNECT 6016 6013 6017 6018 6020  
CONNECT 6020 6016 6021 6022 6023  
CONNECT 6012 6011  
CONNECT 6014 6013  
CONNECT 6015 6013  
CONNECT 6017 6016  
CONNECT 6019 6018  
CONNECT 6021 6020  
CONNECT 6022 6020  
CONNECT 6023 6020  
CONNECT 6011 6012 6013  
CONNECT 6018 6016 6019  
CONNECT 6026 6024 6027 6028 6029  
CONNECT 6029 6026 6030 6031 6033  
CONNECT 6033 6036 6034 6029 6035  
CONNECT 6025 6024  
CONNECT 6027 6026  
CONNECT 6028 6026  
CONNECT 6030 6029  
CONNECT 6032 6031  
CONNECT 6034 6033  
CONNECT 6035 6033  
CONNECT 6036 6033  
CONNECT 6024 6025 6026  
CONNECT 6031 6029 6032  
CONNECT 6039 6040 6037 6041 6042  
CONNECT 6042 6046 6044 6043 6039  
CONNECT 6046 6047 6048 6049 6042  
CONNECT 6038 6037  
CONNECT 6040 6039  
CONNECT 6041 6039  
CONNECT 6043 6042  
CONNECT 6045 6044  
CONNECT 6047 6046  
CONNECT 6048 6046  
CONNECT 6049 6046  
CONNECT 6037 6038 6039  
CONNECT 6044 6045 6042  
CONNECT 6052 6055 6054 6053 6050  
CONNECT 6055 6057 6052 6056 6059  
CONNECT 6059 6060 6055 6062 6061  
CONNECT 6051 6050  
CONNECT 6053 6052  
CONNECT 6054 6052  
CONNECT 6056 6055  
CONNECT 6058 6057  
CONNECT 6060 6059  
CONNECT 6061 6059



CONNECT 6062 6059  
CONNECT 6050 6051 6052  
CONNECT 6057 6058 6055  
CONNECT 6065 6066 6067 6063 6068  
CONNECT 6068 6070 6069 6072 6065  
CONNECT 6072 6075 6074 6073 6068  
CONNECT 6064 6063  
CONNECT 6066 6065  
CONNECT 6067 6065  
CONNECT 6069 6068  
CONNECT 6071 6070  
CONNECT 6073 6072  
CONNECT 6074 6072  
CONNECT 6075 6072  
CONNECT 6063 6065 6064  
CONNECT 6070 6071 6068  
CONNECT 6078 6081 6076 6080 6079  
CONNECT 6081 6083 6085 6082 6078  
CONNECT 6085 6086 6088 6081 6087  
CONNECT 6077 6076  
CONNECT 6079 6078  
CONNECT 6080 6078  
CONNECT 6082 6081  
CONNECT 6084 6083  
CONNECT 6086 6085  
CONNECT 6087 6085  
CONNECT 6088 6085  
CONNECT 6076 6077 6078  
CONNECT 6083 6081 6084  
CONNECT 6091 6093 6092 6094 6089  
CONNECT 6094 6096 6098 6091 6095  
CONNECT 6098 6099 6101 6100 6094  
CONNECT 6090 6089  
CONNECT 6092 6091  
CONNECT 6093 6091  
CONNECT 6095 6094  
CONNECT 6097 6096  
CONNECT 6099 6098  
CONNECT 6100 6098  
CONNECT 6101 6098  
CONNECT 6089 6091 6090  
CONNECT 6096 6097 6094  
CONNECT 6104 6102 6105 6107 6106  
CONNECT 6107 6104 6108 6111 6109  
CONNECT 6111 6113 6114 6112 6107  
CONNECT 6103 6102  
CONNECT 6105 6104  
CONNECT 6106 6104  
CONNECT 6108 6107  
CONNECT 6110 6109  
CONNECT 6112 6111  
CONNECT 6113 6111  
CONNECT 6114 6111  
CONNECT 6102 6104 6103  
CONNECT 6109 6110 6107  
CONNECT 6117 6115 6118 6119 6120  
CONNECT 6120 6122 6117 6124 6121

CONNECT 6124 6127 6125 6126 6120  
CONNECT 6116 6115  
CONNECT 6118 6117  
CONNECT 6119 6117  
CONNECT 6121 6120  
CONNECT 6123 6122  
CONNECT 6125 6124  
CONNECT 6126 6124  
CONNECT 6127 6124  
CONNECT 6115 6116 6117  
CONNECT 6122 6123 6120  
CONNECT 6130 6132 6133 6128 6131  
CONNECT 6133 6134 6135 6137 6130  
CONNECT 6137 6133 6140 6138 6139  
CONNECT 6129 6128  
CONNECT 6131 6130  
CONNECT 6132 6130  
CONNECT 6134 6133  
CONNECT 6136 6135  
CONNECT 6138 6137  
CONNECT 6139 6137  
CONNECT 6140 6137  
CONNECT 6128 6130 6129  
CONNECT 6135 6133 6136  
CONNECT 6143 6144 6141 6146 6145  
CONNECT 6146 6148 6147 6150 6143  
CONNECT 6150 6153 6152 6146 6151  
CONNECT 6142 6141  
CONNECT 6144 6143  
CONNECT 6145 6143  
CONNECT 6147 6146  
CONNECT 6149 6148  
CONNECT 6151 6150  
CONNECT 6152 6150  
CONNECT 6153 6150  
CONNECT 6141 6142 6143  
CONNECT 6148 6149 6146  
CONNECT 6156 6154 6158 6159 6157  
CONNECT 6159 6161 6160 6163 6156  
CONNECT 6163 6166 6165 6159 6164  
CONNECT 6155 6154  
CONNECT 6157 6156  
CONNECT 6158 6156  
CONNECT 6160 6159  
CONNECT 6162 6161  
CONNECT 6164 6163  
CONNECT 6165 6163  
CONNECT 6166 6163  
CONNECT 6154 6155 6156  
CONNECT 6161 6162 6159  
CONNECT 6169 6167 6171 6170 6172  
CONNECT 6172 6176 6173 6174 6169  
CONNECT 6176 6179 6177 6178 6172  
CONNECT 6168 6167  
CONNECT 6170 6169  
CONNECT 6171 6169  
CONNECT 6173 6172

CONNECT 6175 6174  
CONNECT 6177 6176  
CONNECT 6178 6176  
CONNECT 6179 6176  
CONNECT 6167 6168 6169  
CONNECT 6174 6175 6172  
CONNECT 6182 6185 6183 6184 6180  
CONNECT 6185 6186 6187 6182 6189  
CONNECT 6189 6191 6185 6190 6192  
CONNECT 6181 6180  
CONNECT 6183 6182  
CONNECT 6184 6182  
CONNECT 6186 6185  
CONNECT 6188 6187  
CONNECT 6190 6189  
CONNECT 6191 6189  
CONNECT 6192 6189  
CONNECT 6180 6182 6181  
CONNECT 6187 6185 6188  
CONNECT 6195 6196 6197 6193 6198  
CONNECT 6198 6199 6195 6200 6202  
CONNECT 6202 6205 6203 6198 6204  
CONNECT 6194 6193  
CONNECT 6196 6195  
CONNECT 6197 6195  
CONNECT 6199 6198  
CONNECT 6201 6200  
CONNECT 6203 6202  
CONNECT 6204 6202  
CONNECT 6205 6202  
CONNECT 6193 6195 6194  
CONNECT 6200 6201 6198  
CONNECT 6208 6209 6210 6211 6206  
CONNECT 6211 6208 6212 6213 6215  
CONNECT 6215 6216 6217 6211 6218  
CONNECT 6207 6206  
CONNECT 6209 6208  
CONNECT 6210 6208  
CONNECT 6212 6211  
CONNECT 6214 6213  
CONNECT 6216 6215  
CONNECT 6217 6215  
CONNECT 6218 6215  
CONNECT 6206 6208 6207  
CONNECT 6213 6211 6214  
CONNECT 6221 6224 6222 6223 6219  
CONNECT 6224 6225 6221 6226 6228  
CONNECT 6228 6231 6230 6224 6229  
CONNECT 6220 6219  
CONNECT 6222 6221  
CONNECT 6223 6221  
CONNECT 6225 6224  
CONNECT 6227 6226  
CONNECT 6229 6228  
CONNECT 6230 6228  
CONNECT 6231 6228  
CONNECT 6219 6220 6221

CONNECT 6226 6224 6227  
CONNECT 6234 6235 6237 6236 6232  
CONNECT 6237 6239 6241 6234 6238  
CONNECT 6241 6243 6237 6244 6242  
CONNECT 6233 6232  
CONNECT 6235 6234  
CONNECT 6236 6234  
CONNECT 6238 6237  
CONNECT 6240 6239  
CONNECT 6242 6241  
CONNECT 6243 6241  
CONNECT 6244 6241  
CONNECT 6232 6233 6234  
CONNECT 6239 6240 6237  
CONNECT 6247 6245 6248 6250 6249  
CONNECT 6250 6254 6251 6252 6247  
CONNECT 6254 6256 6250 6257 6255  
CONNECT 6246 6245  
CONNECT 6248 6247  
CONNECT 6249 6247  
CONNECT 6251 6250  
CONNECT 6253 6252  
CONNECT 6255 6254  
CONNECT 6256 6254  
CONNECT 6257 6254  
CONNECT 6245 6246 6247  
CONNECT 6252 6250 6253  
CONNECT 6260 6263 6262 6258 6261  
CONNECT 6263 6267 6265 6264 6260  
CONNECT 6267 6270 6269 6268 6263  
CONNECT 6259 6258  
CONNECT 6261 6260  
CONNECT 6262 6260  
CONNECT 6264 6263  
CONNECT 6266 6265  
CONNECT 6268 6267  
CONNECT 6269 6267  
CONNECT 6270 6267  
CONNECT 6258 6259 6260  
CONNECT 6265 6266 6263  
CONNECT 6273 6276 6275 6274 6271  
CONNECT 6276 6273 6278 6280 6277  
CONNECT 6280 6276 6283 6281 6282  
CONNECT 6272 6271  
CONNECT 6274 6273  
CONNECT 6275 6273  
CONNECT 6277 6276  
CONNECT 6279 6278  
CONNECT 6281 6280  
CONNECT 6282 6280  
CONNECT 6283 6280  
CONNECT 6271 6273 6272  
CONNECT 6278 6276 6279  
CONNECT 6286 6284 6287 6289 6288  
CONNECT 6289 6286 6293 6291 6290  
CONNECT 6293 6296 6295 6294 6289  
CONNECT 6285 6284

CONNECT 6287 6286  
CONNECT 6288 6286  
CONNECT 6290 6289  
CONNECT 6292 6291  
CONNECT 6294 6293  
CONNECT 6295 6293  
CONNECT 6296 6293  
CONNECT 6284 6286 6285  
CONNECT 6291 6292 6289  
CONNECT 6299 6302 6301 6300 6297  
CONNECT 6302 6306 6304 6303 6299  
CONNECT 6306 6309 6308 6307 6302  
CONNECT 6298 6297  
CONNECT 6300 6299  
CONNECT 6301 6299  
CONNECT 6303 6302  
CONNECT 6305 6304  
CONNECT 6307 6306  
CONNECT 6308 6306  
CONNECT 6309 6306  
CONNECT 6297 6299 6298  
CONNECT 6304 6305 6302  
CONNECT 6312 6313 6310 6315 6314  
CONNECT 6315 6319 6317 6316 6312  
CONNECT 6319 6320 6322 6315 6321  
CONNECT 6311 6310  
CONNECT 6313 6312  
CONNECT 6314 6312  
CONNECT 6316 6315  
CONNECT 6318 6317  
CONNECT 6320 6319  
CONNECT 6321 6319  
CONNECT 6322 6319  
CONNECT 6310 6312 6311  
CONNECT 6317 6315 6318  
CONNECT 6325 6327 6326 6323 6328  
CONNECT 6328 6329 6325 6332 6330  
CONNECT 6332 6334 6333 6335 6328  
CONNECT 6324 6323  
CONNECT 6326 6325  
CONNECT 6327 6325  
CONNECT 6329 6328  
CONNECT 6331 6330  
CONNECT 6333 6332  
CONNECT 6334 6332  
CONNECT 6335 6332  
CONNECT 6323 6325 6324  
CONNECT 6330 6331 6328  
CONNECT 6338 6336 6341 6340 6339  
CONNECT 6341 6343 6342 6338 6345  
CONNECT 6345 6341 6348 6347 6346  
CONNECT 6337 6336  
CONNECT 6339 6338  
CONNECT 6340 6338  
CONNECT 6342 6341  
CONNECT 6344 6343  
CONNECT 6346 6345

CONNECT 6347 6345  
CONNECT 6348 6345  
CONNECT 6336 6338 6337  
CONNECT 6343 6341 6344  
CONNECT 6351 6353 6349 6354 6352  
CONNECT 6354 6351 6358 6355 6356  
CONNECT 6358 6361 6360 6354 6359  
CONNECT 6350 6349  
CONNECT 6352 6351  
CONNECT 6353 6351  
CONNECT 6355 6354  
CONNECT 6357 6356  
CONNECT 6359 6358  
CONNECT 6360 6358  
CONNECT 6361 6358  
CONNECT 6349 6351 6350  
CONNECT 6356 6357 6354  
CONNECT 6364 6367 6366 6365 6362  
CONNECT 6367 6371 6368 6369 6364  
CONNECT 6371 6374 6373 6372 6367  
CONNECT 6363 6362  
CONNECT 6365 6364  
CONNECT 6366 6364  
CONNECT 6368 6367  
CONNECT 6370 6369  
CONNECT 6372 6371  
CONNECT 6373 6371  
CONNECT 6374 6371  
CONNECT 6362 6364 6363  
CONNECT 6369 6370 6367  
CONNECT 6377 6378 6375 6380 6379  
CONNECT 6380 6384 6382 6381 6377  
CONNECT 6384 6386 6385 6380 6387  
CONNECT 6376 6375  
CONNECT 6378 6377  
CONNECT 6379 6377  
CONNECT 6381 6380  
CONNECT 6383 6382  
CONNECT 6385 6384  
CONNECT 6386 6384  
CONNECT 6387 6384  
CONNECT 6375 6376 6377  
CONNECT 6382 6383 6380  
CONNECT 6390 6393 6392 6391 6388  
CONNECT 6393 6397 6390 6395 6394  
CONNECT 6397 6393 6399 6398 6400  
CONNECT 6389 6388  
CONNECT 6391 6390  
CONNECT 6392 6390  
CONNECT 6394 6393  
CONNECT 6396 6395  
CONNECT 6398 6397  
CONNECT 6399 6397  
CONNECT 6400 6397  
CONNECT 6388 6390 6389  
CONNECT 6395 6393 6396  
CONNECT 6403 6404 6406 6405 6401

CONNECT 6406 6410 6408 6407 6403  
CONNECT 6410 6413 6411 6406 6412  
CONNECT 6402 6401  
CONNECT 6404 6403  
CONNECT 6405 6403  
CONNECT 6407 6406  
CONNECT 6409 6408  
CONNECT 6411 6410  
CONNECT 6412 6410  
CONNECT 6413 6410  
CONNECT 6401 6403 6402  
CONNECT 6408 6406 6409  
CONNECT 6416 6414 6419 6417 6418  
CONNECT 6419 6420 6421 6416 6423  
CONNECT 6423 6426 6424 6419 6425  
CONNECT 6415 6414  
CONNECT 6417 6416  
CONNECT 6418 6416  
CONNECT 6420 6419  
CONNECT 6422 6421  
CONNECT 6424 6423  
CONNECT 6425 6423  
CONNECT 6426 6423  
CONNECT 6414 6415 6416  
CONNECT 6421 6419 6422  
CONNECT 6429 6431 6430 6427 6432  
CONNECT 6432 6433 6429 6434 6436  
CONNECT 6436 6439 6432 6437 6438  
CONNECT 6428 6427  
CONNECT 6430 6429  
CONNECT 6431 6429  
CONNECT 6433 6432  
CONNECT 6435 6434  
CONNECT 6437 6436  
CONNECT 6438 6436  
CONNECT 6439 6436  
CONNECT 6427 6429 6428  
CONNECT 6434 6432 6435  
CONNECT 6442 6440 6444 6443 6445  
CONNECT 6445 6446 6442 6449 6447  
CONNECT 6449 6451 6450 6452 6445  
CONNECT 6441 6440  
CONNECT 6443 6442  
CONNECT 6444 6442  
CONNECT 6446 6445  
CONNECT 6448 6447  
CONNECT 6450 6449  
CONNECT 6451 6449  
CONNECT 6452 6449  
CONNECT 6440 6442 6441  
CONNECT 6447 6448 6445  
CONNECT 6455 6458 6457 6456 6453  
CONNECT 6458 6462 6460 6459 6455  
CONNECT 6462 6465 6458 6464 6463  
CONNECT 6454 6453  
CONNECT 6456 6455  
CONNECT 6457 6455

CONNECT 6459 6458  
CONNECT 6461 6460  
CONNECT 6463 6462  
CONNECT 6464 6462  
CONNECT 6465 6462  
CONNECT 6453 6455 6454  
CONNECT 6460 6461 6458  
CONNECT 6468 6471 6470 6469 6466  
CONNECT 6471 6475 6473 6468 6472  
CONNECT 6475 6477 6471 6478 6476  
CONNECT 6467 6466  
CONNECT 6469 6468  
CONNECT 6470 6468  
CONNECT 6472 6471  
CONNECT 6474 6473  
CONNECT 6476 6475  
CONNECT 6477 6475  
CONNECT 6478 6475  
CONNECT 6466 6468 6467  
CONNECT 6473 6471 6474  
CONNECT 6481 6484 6482 6479 6483  
CONNECT 6484 6486 6481 6488 6485  
CONNECT 6488 6484 6491 6490 6489  
CONNECT 6480 6479  
CONNECT 6482 6481  
CONNECT 6483 6481  
CONNECT 6485 6484  
CONNECT 6487 6486  
CONNECT 6489 6488  
CONNECT 6490 6488  
CONNECT 6491 6488  
CONNECT 6479 6481 6480  
CONNECT 6486 6484 6487  
CONNECT 6494 6496 6495 6492 6497  
CONNECT 6497 6494 6501 6498 6499  
CONNECT 6501 6504 6503 6502 6497  
CONNECT 6493 6492  
CONNECT 6495 6494  
CONNECT 6496 6494  
CONNECT 6498 6497  
CONNECT 6500 6499  
CONNECT 6502 6501  
CONNECT 6503 6501  
CONNECT 6504 6501  
CONNECT 6492 6494 6493  
CONNECT 6499 6500 6497  
CONNECT 6507 6508 6510 6509 6505  
CONNECT 6510 6514 6507 6511 6512  
CONNECT 6514 6515 6510 6517 6516  
CONNECT 6506 6505  
CONNECT 6508 6507  
CONNECT 6509 6507  
CONNECT 6511 6510  
CONNECT 6513 6512  
CONNECT 6515 6514  
CONNECT 6516 6514  
CONNECT 6517 6514



CONNECT 6505 6507 6506  
CONNECT 6512 6510 6513  
CONNECT 6520 6523 6518 6522 6521  
CONNECT 6523 6524 6525 6520 6527  
CONNECT 6527 6523 6530 6529 6528  
CONNECT 6519 6518  
CONNECT 6521 6520  
CONNECT 6522 6520  
CONNECT 6524 6523  
CONNECT 6526 6525  
CONNECT 6528 6527  
CONNECT 6529 6527  
CONNECT 6530 6527  
CONNECT 6518 6520 6519  
CONNECT 6525 6523 6526  
CONNECT 6533 6535 6534 6531 6536  
CONNECT 6536 6538 6537 6540 6533  
CONNECT 6540 6542 6543 6536 6541  
CONNECT 6532 6531  
CONNECT 6534 6533  
CONNECT 6535 6533  
CONNECT 6537 6536  
CONNECT 6539 6538  
CONNECT 6541 6540  
CONNECT 6542 6540  
CONNECT 6543 6540  
CONNECT 6531 6532 6533  
CONNECT 6538 6539 6536  
CONNECT 6546 6549 6548 6547 6544  
CONNECT 6549 6553 6546 6551 6550  
CONNECT 6553 6556 6555 6549 6554  
CONNECT 6545 6544  
CONNECT 6547 6546  
CONNECT 6548 6546  
CONNECT 6550 6549  
CONNECT 6552 6551  
CONNECT 6554 6553  
CONNECT 6555 6553  
CONNECT 6556 6553  
CONNECT 6544 6546 6545  
CONNECT 6551 6549 6552  
CONNECT 6559 6560 6561 6562 6557  
CONNECT 6562 6564 6566 6563 6559  
CONNECT 6566 6569 6568 6567 6562  
CONNECT 6558 6557  
CONNECT 6560 6559  
CONNECT 6561 6559  
CONNECT 6563 6562  
CONNECT 6565 6564  
CONNECT 6567 6566  
CONNECT 6568 6566  
CONNECT 6569 6566  
CONNECT 6557 6559 6558  
CONNECT 6564 6565 6562  
CONNECT 6572 6575 6574 6570 6573  
CONNECT 6575 6576 6577 6572 6579  
CONNECT 6579 6575 6582 6581 6580

CONNECT 6571 6570  
CONNECT 6573 6572  
CONNECT 6574 6572  
CONNECT 6576 6575  
CONNECT 6578 6577  
CONNECT 6580 6579  
CONNECT 6581 6579  
CONNECT 6582 6579  
CONNECT 6570 6571 6572  
CONNECT 6577 6575 6578  
CONNECT 6585 6588 6587 6583 6586  
CONNECT 6588 6592 6590 6589 6585  
CONNECT 6592 6594 6595 6593 6588  
CONNECT 6584 6583  
CONNECT 6586 6585  
CONNECT 6587 6585  
CONNECT 6589 6588  
CONNECT 6591 6590  
CONNECT 6593 6592  
CONNECT 6594 6592  
CONNECT 6595 6592  
CONNECT 6583 6585 6584  
CONNECT 6590 6591 6588  
CONNECT 6598 6601 6600 6599 6596  
CONNECT 6601 6602 6598 6605 6603  
CONNECT 6605 6601 6607 6606 6608  
CONNECT 6597 6596  
CONNECT 6599 6598  
CONNECT 6600 6598  
CONNECT 6602 6601  
CONNECT 6604 6603  
CONNECT 6606 6605  
CONNECT 6607 6605  
CONNECT 6608 6605  
CONNECT 6596 6597 6598  
CONNECT 6603 6601 6604  
CONNECT 6611 6613 6609 6612 6614  
CONNECT 6614 6618 6616 6615 6611  
CONNECT 6618 6620 6619 6621 6614  
CONNECT 6610 6609  
CONNECT 6612 6611  
CONNECT 6613 6611  
CONNECT 6615 6614  
CONNECT 6617 6616  
CONNECT 6619 6618  
CONNECT 6620 6618  
CONNECT 6621 6618  
CONNECT 6609 6611 6610  
CONNECT 6616 6617 6614  
CONNECT 6624 6627 6626 6622 6625  
CONNECT 6627 6628 6631 6629 6624  
CONNECT 6631 6633 6632 6627 6634  
CONNECT 6623 6622  
CONNECT 6625 6624  
CONNECT 6626 6624  
CONNECT 6628 6627  
CONNECT 6630 6629

CONNECT 6632 6631  
CONNECT 6633 6631  
CONNECT 6634 6631  
CONNECT 6622 6623 6624  
CONNECT 6629 6627 6630  
CONNECT 6637 6640 6639 6638 6635  
CONNECT 6640 6644 6642 6641 6637  
CONNECT 6644 6646 6647 6640 6645  
CONNECT 6636 6635  
CONNECT 6638 6637  
CONNECT 6639 6637  
CONNECT 6641 6640  
CONNECT 6643 6642  
CONNECT 6645 6644  
CONNECT 6646 6644  
CONNECT 6647 6644  
CONNECT 6635 6637 6636  
CONNECT 6642 6640 6643  
CONNECT 6650 6653 6651 6648 6652  
CONNECT 6653 6655 6654 6650 6657  
CONNECT 6657 6653 6660 6659 6658  
CONNECT 6649 6648  
CONNECT 6651 6650  
CONNECT 6652 6650  
CONNECT 6654 6653  
CONNECT 6656 6655  
CONNECT 6658 6657  
CONNECT 6659 6657  
CONNECT 6660 6657  
CONNECT 6648 6650 6649  
CONNECT 6655 6653 6656  
CONNECT 6663 6666 6665 6664 6661  
CONNECT 6666 6668 6670 6667 6663  
CONNECT 6670 6673 6672 6671 6666  
CONNECT 6662 6661  
CONNECT 6664 6663  
CONNECT 6665 6663  
CONNECT 6667 6666  
CONNECT 6669 6668  
CONNECT 6671 6670  
CONNECT 6672 6670  
CONNECT 6673 6670  
CONNECT 6661 6662 6663  
CONNECT 6668 6669 6666  
CONNECT 6676 6679 6677 6678 6674  
CONNECT 6679 6680 6681 6683 6676  
CONNECT 6683 6685 6679 6684 6686  
CONNECT 6675 6674  
CONNECT 6677 6676  
CONNECT 6678 6676  
CONNECT 6680 6679  
CONNECT 6682 6681  
CONNECT 6684 6683  
CONNECT 6685 6683  
CONNECT 6686 6683  
CONNECT 6674 6675 6676  
CONNECT 6681 6679 6682

CONNECT 6689 6691 6690 6692 6687  
CONNECT 6692 6696 6694 6693 6689  
CONNECT 6696 6698 6697 6699 6692  
CONNECT 6688 6687  
CONNECT 6690 6689  
CONNECT 6691 6689  
CONNECT 6693 6692  
CONNECT 6695 6694  
CONNECT 6697 6696  
CONNECT 6698 6696  
CONNECT 6699 6696  
CONNECT 6687 6689 6688  
CONNECT 6694 6695 6692  
CONNECT 6702 6703 6700 6705 6704  
CONNECT 6705 6709 6702 6706 6707  
CONNECT 6709 6712 6710 6711 6705  
CONNECT 6701 6700  
CONNECT 6703 6702  
CONNECT 6704 6702  
CONNECT 6706 6705  
CONNECT 6708 6707  
CONNECT 6710 6709  
CONNECT 6711 6709  
CONNECT 6712 6709  
CONNECT 6700 6701 6702  
CONNECT 6707 6705 6708  
CONNECT 6715 6718 6717 6716 6713  
CONNECT 6718 6720 6722 6715 6719  
CONNECT 6722 6718 6724 6725 6723  
CONNECT 6714 6713  
CONNECT 6716 6715  
CONNECT 6717 6715  
CONNECT 6719 6718  
CONNECT 6721 6720  
CONNECT 6723 6722  
CONNECT 6724 6722  
CONNECT 6725 6722  
CONNECT 6713 6715 6714  
CONNECT 6720 6718 6721  
CONNECT 6728 6730 6729 6731 6726  
CONNECT 6731 6733 6735 6732 6728  
CONNECT 6735 6738 6737 6736 6731  
CONNECT 6727 6726  
CONNECT 6729 6728  
CONNECT 6730 6728  
CONNECT 6732 6731  
CONNECT 6734 6733  
CONNECT 6736 6735  
CONNECT 6737 6735  
CONNECT 6738 6735  
CONNECT 6726 6727 6728  
CONNECT 6733 6734 6731  
CONNECT 6741 6739 6743 6744 6742  
CONNECT 6744 6745 6748 6741 6746  
CONNECT 6748 6751 6750 6749 6744  
CONNECT 6740 6739  
CONNECT 6742 6741

CONNECT 6743 6741  
CONNECT 6745 6744  
CONNECT 6747 6746  
CONNECT 6749 6748  
CONNECT 6750 6748  
CONNECT 6751 6748  
CONNECT 6739 6741 6740  
CONNECT 6746 6747 6744  
CONNECT 6754 6756 6757 6755 6752  
CONNECT 6757 6754 6761 6758 6759  
CONNECT 6761 6764 6757 6763 6762  
CONNECT 6753 6752  
CONNECT 6755 6754  
CONNECT 6756 6754  
CONNECT 6758 6757  
CONNECT 6760 6759  
CONNECT 6762 6761  
CONNECT 6763 6761  
CONNECT 6764 6761  
CONNECT 6752 6754 6753  
CONNECT 6759 6760 6757  
CONNECT 6767 6768 6770 6765 6769  
CONNECT 6770 6772 6771 6767 6774  
CONNECT 6774 6775 6777 6776 6770  
CONNECT 6766 6765  
CONNECT 6768 6767  
CONNECT 6769 6767  
CONNECT 6771 6770  
CONNECT 6773 6772  
CONNECT 6775 6774  
CONNECT 6776 6774  
CONNECT 6777 6774  
CONNECT 6765 6766 6767  
CONNECT 6772 6773 6770  
CONNECT 6780 6782 6783 6781 6778  
CONNECT 6783 6787 6785 6780 6784  
CONNECT 6787 6790 6789 6788 6783  
CONNECT 6779 6778  
CONNECT 6781 6780  
CONNECT 6782 6780  
CONNECT 6784 6783  
CONNECT 6786 6785  
CONNECT 6788 6787  
CONNECT 6789 6787  
CONNECT 6790 6787  
CONNECT 6778 6779 6780  
CONNECT 6785 6786 6783  
CONNECT 6793 6795 6794 6791 6796  
CONNECT 6796 6798 6797 6793 6800  
CONNECT 6800 6801 6802 6796 6803  
CONNECT 6792 6791  
CONNECT 6794 6793  
CONNECT 6795 6793  
CONNECT 6797 6796  
CONNECT 6799 6798  
CONNECT 6801 6800  
CONNECT 6802 6800

CONNECT 6803 6800  
CONNECT 6791 6792 6793  
CONNECT 6798 6796 6799  
CONNECT 6806 6804 6809 6808 6807  
CONNECT 6809 6813 6811 6810 6806  
CONNECT 6813 6815 6816 6814 6809  
CONNECT 6805 6804  
CONNECT 6807 6806  
CONNECT 6808 6806  
CONNECT 6810 6809  
CONNECT 6812 6811  
CONNECT 6814 6813  
CONNECT 6815 6813  
CONNECT 6816 6813  
CONNECT 6804 6806 6805  
CONNECT 6811 6812 6809  
CONNECT 6819 6821 6822 6820 6817  
CONNECT 6822 6826 6819 6824 6823  
CONNECT 6826 6829 6822 6827 6828  
CONNECT 6818 6817  
CONNECT 6820 6819  
CONNECT 6821 6819  
CONNECT 6823 6822  
CONNECT 6825 6824  
CONNECT 6827 6826  
CONNECT 6828 6826  
CONNECT 6829 6826  
CONNECT 6817 6819 6818  
CONNECT 6824 6825 6822  
CONNECT 6832 6835 6830 6834 6833  
CONNECT 6835 6832 6839 6837 6836  
CONNECT 6839 6835 6840 6842 6841  
CONNECT 6831 6830  
CONNECT 6833 6832  
CONNECT 6834 6832  
CONNECT 6836 6835  
CONNECT 6838 6837  
CONNECT 6840 6839  
CONNECT 6841 6839  
CONNECT 6842 6839  
CONNECT 6830 6832 6831  
CONNECT 6837 6835 6838  
CONNECT 6845 6848 6846 6843 6847  
CONNECT 6848 6845 6852 6850 6849  
CONNECT 6852 6853 6848 6855 6854  
CONNECT 6844 6843  
CONNECT 6846 6845  
CONNECT 6847 6845  
CONNECT 6849 6848  
CONNECT 6851 6850  
CONNECT 6853 6852  
CONNECT 6854 6852  
CONNECT 6855 6852  
CONNECT 6843 6845 6844  
CONNECT 6850 6848 6851  
CONNECT 6858 6860 6859 6861 6856  
CONNECT 6861 6865 6863 6862 6858

CONNECT 6865 6868 6867 6866 6861  
CONNECT 6857 6856  
CONNECT 6859 6858  
CONNECT 6860 6858  
CONNECT 6862 6861  
CONNECT 6864 6863  
CONNECT 6866 6865  
CONNECT 6867 6865  
CONNECT 6868 6865  
CONNECT 6856 6858 6857  
CONNECT 6863 6864 6861  
CONNECT 6871 6874 6873 6872 6869  
CONNECT 6874 6876 6875 6871 6878  
CONNECT 6878 6881 6880 6874 6879  
CONNECT 6870 6869  
CONNECT 6872 6871  
CONNECT 6873 6871  
CONNECT 6875 6874  
CONNECT 6877 6876  
CONNECT 6879 6878  
CONNECT 6880 6878  
CONNECT 6881 6878  
CONNECT 6869 6871 6870  
CONNECT 6876 6877 6874  
CONNECT 6884 6882 6887 6886 6885  
CONNECT 6887 6891 6889 6888 6884  
CONNECT 6891 6894 6893 6892 6887  
CONNECT 6883 6882  
CONNECT 6885 6884  
CONNECT 6886 6884  
CONNECT 6888 6887  
CONNECT 6890 6889  
CONNECT 6892 6891  
CONNECT 6893 6891  
CONNECT 6894 6891  
CONNECT 6882 6883 6884  
CONNECT 6889 6890 6887  
CONNECT 6897 6900 6899 6895 6898  
CONNECT 6900 6901 6897 6904 6902  
CONNECT 6904 6907 6906 6900 6905  
CONNECT 6896 6895  
CONNECT 6898 6897  
CONNECT 6899 6897  
CONNECT 6901 6900  
CONNECT 6903 6902  
CONNECT 6905 6904  
CONNECT 6906 6904  
CONNECT 6907 6904  
CONNECT 6895 6897 6896  
CONNECT 6902 6903 6900  
CONNECT 6910 6913 6912 6911 6908  
CONNECT 6913 6917 6915 6910 6914  
CONNECT 6917 6920 6913 6919 6918  
CONNECT 6909 6908  
CONNECT 6911 6910  
CONNECT 6912 6910  
CONNECT 6914 6913

CONNECT 6916 6915  
CONNECT 6918 6917  
CONNECT 6919 6917  
CONNECT 6920 6917  
CONNECT 6908 6910 6909  
CONNECT 6915 6913 6916  
CONNECT 6923 6924 6921 6926 6925  
CONNECT 6926 6927 6923 6928 6930  
CONNECT 6930 6931 6933 6932 6926  
CONNECT 6922 6921  
CONNECT 6924 6923  
CONNECT 6925 6923  
CONNECT 6927 6926  
CONNECT 6929 6928  
CONNECT 6931 6930  
CONNECT 6932 6930  
CONNECT 6933 6930  
CONNECT 6921 6922 6923  
CONNECT 6928 6929 6926  
CONNECT 6936 6938 6939 6934 6937  
CONNECT 6939 6943 6940 6936 6941  
CONNECT 6943 6946 6945 6944 6939  
CONNECT 6935 6934  
CONNECT 6937 6936  
CONNECT 6938 6936  
CONNECT 6940 6939  
CONNECT 6942 6941  
CONNECT 6944 6943  
CONNECT 6945 6943  
CONNECT 6946 6943  
CONNECT 6934 6936 6935  
CONNECT 6941 6942 6939  
CONNECT 6949 6947 6951 6950 6952  
CONNECT 6952 6956 6949 6953 6954  
CONNECT 6956 6957 6959 6958 6952  
CONNECT 6948 6947  
CONNECT 6950 6949  
CONNECT 6951 6949  
CONNECT 6953 6952  
CONNECT 6955 6954  
CONNECT 6957 6956  
CONNECT 6958 6956  
CONNECT 6959 6956  
CONNECT 6947 6948 6949  
CONNECT 6954 6955 6952  
CONNECT 6962 6965 6964 6963 6960  
CONNECT 6965 6967 6969 6966 6962  
CONNECT 6969 6972 6971 6970 6965  
CONNECT 6961 6960  
CONNECT 6963 6962  
CONNECT 6964 6962  
CONNECT 6966 6965  
CONNECT 6968 6967  
CONNECT 6970 6969  
CONNECT 6971 6969  
CONNECT 6972 6969  
CONNECT 6960 6961 6962



CONNECT 6967 6968 6965  
CONNECT 6975 6978 6977 6976 6973  
CONNECT 6978 6982 6975 6980 6979  
CONNECT 6982 6978 6985 6984 6983  
CONNECT 6974 6973  
CONNECT 6976 6975  
CONNECT 6977 6975  
CONNECT 6979 6978  
CONNECT 6981 6980  
CONNECT 6983 6982  
CONNECT 6984 6982  
CONNECT 6985 6982  
CONNECT 6973 6975 6974  
CONNECT 6980 6978 6981  
CONNECT 6988 6990 6989 6991 6986  
CONNECT 6991 6995 6993 6988 6992  
CONNECT 6995 6998 6997 6991 6996  
CONNECT 6987 6986  
CONNECT 6989 6988  
CONNECT 6990 6988  
CONNECT 6992 6991  
CONNECT 6994 6993  
CONNECT 6996 6995  
CONNECT 6997 6995  
CONNECT 6998 6995  
CONNECT 6986 6988 6987  
CONNECT 6993 6994 6991  
CONNECT 7001 7004 7003 7002 6999  
CONNECT 7004 7001 7006 7005 7008  
CONNECT 7008 7004 7011 7010 7009  
CONNECT 7000 6999  
CONNECT 7002 7001  
CONNECT 7003 7001  
CONNECT 7005 7004  
CONNECT 7007 7006  
CONNECT 7009 7008  
CONNECT 7010 7008  
CONNECT 7011 7008  
CONNECT 6999 7001 7000  
CONNECT 7006 7007 7004  
CONNECT 7014 7016 7017 7015 7012  
CONNECT 7017 7014 7018 7019 7021  
CONNECT 7021 7022 7024 7017 7023  
CONNECT 7013 7012  
CONNECT 7015 7014  
CONNECT 7016 7014  
CONNECT 7018 7017  
CONNECT 7020 7019  
CONNECT 7022 7021  
CONNECT 7023 7021  
CONNECT 7024 7021  
CONNECT 7012 7014 7013  
CONNECT 7019 7020 7017  
CONNECT 7027 7030 7029 7028 7025  
CONNECT 7030 7032 7034 7031 7027  
CONNECT 7034 7036 7035 7030 7037  
CONNECT 7026 7025

CONNECT 7028 7027  
CONNECT 7029 7027  
CONNECT 7031 7030  
CONNECT 7033 7032  
CONNECT 7035 7034  
CONNECT 7036 7034  
CONNECT 7037 7034  
CONNECT 7025 7026 7027  
CONNECT 7032 7033 7030  
CONNECT 7040 7038 7042 7041 7043  
CONNECT 7043 7047 7044 7040 7045  
CONNECT 7047 7050 7043 7048 7049  
CONNECT 7039 7038  
CONNECT 7041 7040  
CONNECT 7042 7040  
CONNECT 7044 7043  
CONNECT 7046 7045  
CONNECT 7048 7047  
CONNECT 7049 7047  
CONNECT 7050 7047  
CONNECT 7038 7040 7039  
CONNECT 7045 7043 7046  
CONNECT 7053 7054 7055 7056 7051  
CONNECT 7056 7057 7060 7058 7053  
CONNECT 7060 7061 7062 7056 7063  
CONNECT 7052 7051  
CONNECT 7054 7053  
CONNECT 7055 7053  
CONNECT 7057 7056  
CONNECT 7059 7058  
CONNECT 7061 7060  
CONNECT 7062 7060  
CONNECT 7063 7060  
CONNECT 7051 7053 7052  
CONNECT 7058 7059 7056  
CONNECT 7066 7069 7068 7067 7064  
CONNECT 7069 7071 7073 7070 7066  
CONNECT 7073 7075 7074 7069 7076  
CONNECT 7065 7064  
CONNECT 7067 7066  
CONNECT 7068 7066  
CONNECT 7070 7069  
CONNECT 7072 7071  
CONNECT 7074 7073  
CONNECT 7075 7073  
CONNECT 7076 7073  
CONNECT 7064 7066 7065  
CONNECT 7071 7072 7069  
CONNECT 7079 7082 7077 7081 7080  
CONNECT 7082 7083 7086 7084 7079  
CONNECT 7086 7082 7089 7088 7087  
CONNECT 7078 7077  
CONNECT 7080 7079  
CONNECT 7081 7079  
CONNECT 7083 7082  
CONNECT 7085 7084  
CONNECT 7087 7086

CONNECT 7088 7086  
CONNECT 7089 7086  
CONNECT 7077 7079 7078  
CONNECT 7084 7085 7082  
CONNECT 7092 7094 7095 7093 7090  
CONNECT 7095 7092 7099 7097 7096  
CONNECT 7099 7102 7101 7100 7095  
CONNECT 7091 7090  
CONNECT 7093 7092  
CONNECT 7094 7092  
CONNECT 7096 7095  
CONNECT 7098 7097  
CONNECT 7100 7099  
CONNECT 7101 7099  
CONNECT 7102 7099  
CONNECT 7090 7092 7091  
CONNECT 7097 7095 7098  
CONNECT 7105 7107 7108 7106 7103  
CONNECT 7108 7110 7112 7109 7105  
CONNECT 7112 7113 7114 7115 7108  
CONNECT 7104 7103  
CONNECT 7106 7105  
CONNECT 7107 7105  
CONNECT 7109 7108  
CONNECT 7111 7110  
CONNECT 7113 7112  
CONNECT 7114 7112  
CONNECT 7115 7112  
CONNECT 7103 7105 7104  
CONNECT 7110 7111 7108  
CONNECT 7118 7116 7119 7121 7120  
CONNECT 7121 7123 7122 7118 7125  
CONNECT 7125 7126 7128 7121 7127  
CONNECT 7117 7116  
CONNECT 7119 7118  
CONNECT 7120 7118  
CONNECT 7122 7121  
CONNECT 7124 7123  
CONNECT 7126 7125  
CONNECT 7127 7125  
CONNECT 7128 7125  
CONNECT 7116 7118 7117  
CONNECT 7123 7124 7121  
CONNECT 7131 7132 7134 7129 7133  
CONNECT 7134 7136 7131 7135 7138  
CONNECT 7138 7134 7141 7139 7140  
CONNECT 7130 7129  
CONNECT 7132 7131  
CONNECT 7133 7131  
CONNECT 7135 7134  
CONNECT 7137 7136  
CONNECT 7139 7138  
CONNECT 7140 7138  
CONNECT 7141 7138  
CONNECT 7129 7131 7130  
CONNECT 7136 7137 7134  
CONNECT 7144 7147 7142 7145 7146

CONECT 7147 7151 7149 7144 7148  
CONECT 7151 7147 7154 7152 7153  
CONECT 7143 7142  
CONECT 7145 7144  
CONECT 7146 7144  
CONECT 7148 7147  
CONECT 7150 7149  
CONECT 7152 7151  
CONECT 7153 7151  
CONECT 7154 7151  
CONECT 7142 7144 7143  
CONECT 7149 7147 7150  
CONECT 7157 7160 7158 7155 7159  
CONECT 7160 7157 7161 7162 7164  
CONECT 7164 7160 7167 7166 7165  
CONECT 7156 7155  
CONECT 7158 7157  
CONECT 7159 7157  
CONECT 7161 7160  
CONECT 7163 7162  
CONECT 7165 7164  
CONECT 7166 7164  
CONECT 7167 7164  
CONECT 7155 7157 7156  
CONECT 7162 7160 7163  
CONECT 7170 7172 7168 7173 7171  
CONECT 7173 7170 7177 7175 7174  
CONECT 7177 7178 7173 7179 7180  
CONECT 7169 7168  
CONECT 7171 7170  
CONECT 7172 7170  
CONECT 7174 7173  
CONECT 7176 7175  
CONECT 7178 7177  
CONECT 7179 7177  
CONECT 7180 7177  
CONECT 7168 7170 7169  
CONECT 7175 7176 7173  
CONECT 7183 7186 7185 7184 7181  
CONECT 7186 7188 7183 7190 7187  
CONECT 7190 7186 7193 7192 7191  
CONECT 7182 7181  
CONECT 7184 7183  
CONECT 7185 7183  
CONECT 7187 7186  
CONECT 7189 7188  
CONECT 7191 7190  
CONECT 7192 7190  
CONECT 7193 7190  
CONECT 7181 7183 7182  
CONECT 7188 7186 7189  
CONECT 7196 7199 7198 7197 7194  
CONECT 7199 7201 7203 7200 7196  
CONECT 7203 7206 7205 7199 7204  
CONECT 7195 7194  
CONECT 7197 7196  
CONECT 7198 7196

CONNECT 7200 7199  
CONNECT 7202 7201  
CONNECT 7204 7203  
CONNECT 7205 7203  
CONNECT 7206 7203  
CONNECT 7194 7195 7196  
CONNECT 7201 7202 7199  
CONNECT 7209 7207 7212 7211 7210  
CONNECT 7212 7213 7216 7214 7209  
CONNECT 7216 7219 7218 7217 7212  
CONNECT 7208 7207  
CONNECT 7210 7209  
CONNECT 7211 7209  
CONNECT 7213 7212  
CONNECT 7215 7214  
CONNECT 7217 7216  
CONNECT 7218 7216  
CONNECT 7219 7216  
CONNECT 7207 7209 7208  
CONNECT 7214 7215 7212  
CONNECT 7222 7223 7220 7225 7224  
CONNECT 7225 7227 7222 7226 7229  
CONNECT 7229 7231 7225 7230 7232  
CONNECT 7221 7220  
CONNECT 7223 7222  
CONNECT 7224 7222  
CONNECT 7226 7225  
CONNECT 7228 7227  
CONNECT 7230 7229  
CONNECT 7231 7229  
CONNECT 7232 7229  
CONNECT 7220 7222 7221  
CONNECT 7227 7228 7225  
CONNECT 7235 7233 7238 7237 7236  
CONNECT 7238 7242 7240 7239 7235  
CONNECT 7242 7244 7243 7238 7245  
CONNECT 7234 7233  
CONNECT 7236 7235  
CONNECT 7237 7235  
CONNECT 7239 7238  
CONNECT 7241 7240  
CONNECT 7243 7242  
CONNECT 7244 7242  
CONNECT 7245 7242  
CONNECT 7233 7235 7234  
CONNECT 7240 7241 7238  
CONNECT 7248 7249 7246 7251 7250  
CONNECT 7251 7253 7255 7248 7252  
CONNECT 7255 7257 7258 7256 7251  
CONNECT 7247 7246  
CONNECT 7249 7248  
CONNECT 7250 7248  
CONNECT 7252 7251  
CONNECT 7254 7253  
CONNECT 7256 7255  
CONNECT 7257 7255  
CONNECT 7258 7255

CONNECT 7246 7248 7247  
CONNECT 7253 7254 7251  
CONNECT 7261 7259 7264 7263 7262  
CONNECT 7264 7261 7266 7268 7265  
CONNECT 7268 7269 7271 7270 7264  
CONNECT 7260 7259  
CONNECT 7262 7261  
CONNECT 7263 7261  
CONNECT 7265 7264  
CONNECT 7267 7266  
CONNECT 7269 7268  
CONNECT 7270 7268  
CONNECT 7271 7268  
CONNECT 7259 7261 7260  
CONNECT 7266 7267 7264  
CONNECT 7274 7272 7276 7277 7275  
CONNECT 7277 7274 7281 7278 7279  
CONNECT 7281 7284 7283 7282 7277  
CONNECT 7273 7272  
CONNECT 7275 7274  
CONNECT 7276 7274  
CONNECT 7278 7277  
CONNECT 7280 7279  
CONNECT 7282 7281  
CONNECT 7283 7281  
CONNECT 7284 7281  
CONNECT 7272 7274 7273  
CONNECT 7279 7277 7280  
CONNECT 7287 7290 7285 7289 7288  
CONNECT 7290 7287 7294 7292 7291  
CONNECT 7294 7290 7297 7296 7295  
CONNECT 7286 7285  
CONNECT 7288 7287  
CONNECT 7289 7287  
CONNECT 7291 7290  
CONNECT 7293 7292  
CONNECT 7295 7294  
CONNECT 7296 7294  
CONNECT 7297 7294  
CONNECT 7285 7287 7286  
CONNECT 7292 7290 7293  
CONNECT 7300 7302 7303 7301 7298  
CONNECT 7303 7307 7300 7305 7304  
CONNECT 7307 7310 7309 7308 7303  
CONNECT 7299 7298  
CONNECT 7301 7300  
CONNECT 7302 7300  
CONNECT 7304 7303  
CONNECT 7306 7305  
CONNECT 7308 7307  
CONNECT 7309 7307  
CONNECT 7310 7307  
CONNECT 7298 7300 7299  
CONNECT 7305 7306 7303  
CONNECT 7313 7314 7311 7316 7315  
CONNECT 7316 7313 7320 7318 7317  
CONNECT 7320 7323 7322 7321 7316

CONNECT 7312 7311  
CONNECT 7314 7313  
CONNECT 7315 7313  
CONNECT 7317 7316  
CONNECT 7319 7318  
CONNECT 7321 7320  
CONNECT 7322 7320  
CONNECT 7323 7320  
CONNECT 7311 7313 7312  
CONNECT 7318 7319 7316  
CONNECT 7326 7324 7329 7328 7327  
CONNECT 7329 7326 7331 7330 7333  
CONNECT 7333 7336 7335 7334 7329  
CONNECT 7325 7324  
CONNECT 7327 7326  
CONNECT 7328 7326  
CONNECT 7330 7329  
CONNECT 7332 7331  
CONNECT 7334 7333  
CONNECT 7335 7333  
CONNECT 7336 7333  
CONNECT 7324 7326 7325  
CONNECT 7331 7332 7329  
CONNECT 7339 7341 7340 7337 7342  
CONNECT 7342 7343 7346 7344 7339  
CONNECT 7346 7349 7348 7347 7342  
CONNECT 7338 7337  
CONNECT 7340 7339  
CONNECT 7341 7339  
CONNECT 7343 7342  
CONNECT 7345 7344  
CONNECT 7347 7346  
CONNECT 7348 7346  
CONNECT 7349 7346  
CONNECT 7337 7339 7338  
CONNECT 7344 7345 7342  
CONNECT 7352 7354 7350 7355 7353  
CONNECT 7355 7357 7359 7356 7352  
CONNECT 7359 7360 7361 7355 7362  
CONNECT 7351 7350  
CONNECT 7353 7352  
CONNECT 7354 7352  
CONNECT 7356 7355  
CONNECT 7358 7357  
CONNECT 7360 7359  
CONNECT 7361 7359  
CONNECT 7362 7359  
CONNECT 7350 7352 7351  
CONNECT 7357 7358 7355  
CONNECT 7365 7366 7367 7363 7368  
CONNECT 7368 7369 7365 7372 7370  
CONNECT 7372 7374 7375 7373 7368  
CONNECT 7364 7363  
CONNECT 7366 7365  
CONNECT 7367 7365  
CONNECT 7369 7368  
CONNECT 7371 7370

CONNECT 7373 7372  
CONNECT 7374 7372  
CONNECT 7375 7372  
CONNECT 7363 7365 7364  
CONNECT 7370 7371 7368  
CONNECT 7378 7380 7379 7376 7381  
CONNECT 7381 7385 7382 7378 7383  
CONNECT 7385 7387 7388 7386 7381  
CONNECT 7377 7376  
CONNECT 7379 7378  
CONNECT 7380 7378  
CONNECT 7382 7381  
CONNECT 7384 7383  
CONNECT 7386 7385  
CONNECT 7387 7385  
CONNECT 7388 7385  
CONNECT 7376 7378 7377  
CONNECT 7383 7384 7381  
CONNECT 7391 7389 7394 7393 7392  
CONNECT 7394 7396 7398 7391 7395  
CONNECT 7398 7401 7399 7394 7400  
CONNECT 7390 7389  
CONNECT 7392 7391  
CONNECT 7393 7391  
CONNECT 7395 7394  
CONNECT 7397 7396  
CONNECT 7399 7398  
CONNECT 7400 7398  
CONNECT 7401 7398  
CONNECT 7389 7390 7391  
CONNECT 7396 7397 7394  
CONNECT 7404 7407 7406 7402 7405  
CONNECT 7407 7409 7411 7404 7408  
CONNECT 7411 7407 7412 7414 7413  
CONNECT 7403 7402  
CONNECT 7405 7404  
CONNECT 7406 7404  
CONNECT 7408 7407  
CONNECT 7410 7409  
CONNECT 7412 7411  
CONNECT 7413 7411  
CONNECT 7414 7411  
CONNECT 7402 7403 7404  
CONNECT 7409 7407 7410  
CONNECT 7417 7415 7420 7419 7418  
CONNECT 7420 7417 7421 7424 7422  
CONNECT 7424 7420 7426 7425 7427  
CONNECT 7416 7415  
CONNECT 7418 7417  
CONNECT 7419 7417  
CONNECT 7421 7420  
CONNECT 7423 7422  
CONNECT 7425 7424  
CONNECT 7426 7424  
CONNECT 7427 7424  
CONNECT 7415 7417 7416  
CONNECT 7422 7420 7423



CONNECT 7430 7428 7432 7431 7433  
CONNECT 7433 7437 7435 7434 7430  
CONNECT 7437 7440 7438 7439 7433  
CONNECT 7429 7428  
CONNECT 7431 7430  
CONNECT 7432 7430  
CONNECT 7434 7433  
CONNECT 7436 7435  
CONNECT 7438 7437  
CONNECT 7439 7437  
CONNECT 7440 7437  
CONNECT 7428 7429 7430  
CONNECT 7435 7436 7433  
CONNECT 7443 7446 7441 7444 7445  
CONNECT 7446 7450 7447 7443 7448  
CONNECT 7450 7453 7451 7446 7452  
CONNECT 7442 7441  
CONNECT 7444 7443  
CONNECT 7445 7443  
CONNECT 7447 7446  
CONNECT 7449 7448  
CONNECT 7451 7450  
CONNECT 7452 7450  
CONNECT 7453 7450  
CONNECT 7441 7443 7442  
CONNECT 7448 7446 7449  
CONNECT 7456 7459 7458 7454 7457  
CONNECT 7459 7463 7461 7460 7456  
CONNECT 7463 7466 7465 7459 7464  
CONNECT 7455 7454  
CONNECT 7457 7456  
CONNECT 7458 7456  
CONNECT 7460 7459  
CONNECT 7462 7461  
CONNECT 7464 7463  
CONNECT 7465 7463  
CONNECT 7466 7463  
CONNECT 7454 7456 7455  
CONNECT 7461 7462 7459  
CONNECT 7469 7467 7472 7471 7470  
CONNECT 7472 7469 7476 7474 7473  
CONNECT 7476 7479 7478 7477 7472  
CONNECT 7468 7467  
CONNECT 7470 7469  
CONNECT 7471 7469  
CONNECT 7473 7472  
CONNECT 7475 7474  
CONNECT 7477 7476  
CONNECT 7478 7476  
CONNECT 7479 7476  
CONNECT 7467 7468 7469  
CONNECT 7474 7475 7472  
CONNECT 7482 7485 7483 7484 7480  
CONNECT 7485 7489 7487 7486 7482  
CONNECT 7489 7490 7485 7491 7492  
CONNECT 7481 7480  
CONNECT 7483 7482

CONNECT 7484 7482  
CONNECT 7486 7485  
CONNECT 7488 7487  
CONNECT 7490 7489  
CONNECT 7491 7489  
CONNECT 7492 7489  
CONNECT 7480 7482 7481  
CONNECT 7487 7488 7485  
CONNECT 7495 7498 7497 7496 7493  
CONNECT 7498 7502 7500 7499 7495  
CONNECT 7502 7498 7505 7504 7503  
CONNECT 7494 7493  
CONNECT 7496 7495  
CONNECT 7497 7495  
CONNECT 7499 7498  
CONNECT 7501 7500  
CONNECT 7503 7502  
CONNECT 7504 7502  
CONNECT 7505 7502  
CONNECT 7493 7494 7495  
CONNECT 7500 7501 7498  
CONNECT 7508 7511 7510 7509 7506  
CONNECT 7511 7512 7508 7513 7515  
CONNECT 7515 7511 7518 7517 7516  
CONNECT 7507 7506  
CONNECT 7509 7508  
CONNECT 7510 7508  
CONNECT 7512 7511  
CONNECT 7514 7513  
CONNECT 7516 7515  
CONNECT 7517 7515  
CONNECT 7518 7515  
CONNECT 7506 7508 7507  
CONNECT 7513 7511 7514  
CONNECT 7521 7522 7524 7523 7519  
CONNECT 7524 7528 7525 7526 7521  
CONNECT 7528 7530 7531 7529 7524  
CONNECT 7520 7519  
CONNECT 7522 7521  
CONNECT 7523 7521  
CONNECT 7525 7524  
CONNECT 7527 7526  
CONNECT 7529 7528  
CONNECT 7530 7528  
CONNECT 7531 7528  
CONNECT 7519 7521 7520  
CONNECT 7526 7527 7524  
CONNECT 7534 7536 7537 7532 7535  
CONNECT 7537 7534 7541 7539 7538  
CONNECT 7541 7544 7543 7542 7537  
CONNECT 7533 7532  
CONNECT 7535 7534  
CONNECT 7536 7534  
CONNECT 7538 7537  
CONNECT 7540 7539  
CONNECT 7542 7541  
CONNECT 7543 7541

CONNECT 7544 7541  
CONNECT 7532 7534 7533  
CONNECT 7539 7540 7537  
CONNECT 7547 7550 7549 7548 7545  
CONNECT 7550 7554 7551 7552 7547  
CONNECT 7554 7556 7555 7550 7557  
CONNECT 7546 7545  
CONNECT 7548 7547  
CONNECT 7549 7547  
CONNECT 7551 7550  
CONNECT 7553 7552  
CONNECT 7555 7554  
CONNECT 7556 7554  
CONNECT 7557 7554  
CONNECT 7545 7546 7547  
CONNECT 7552 7553 7550  
CONNECT 7560 7562 7561 7558 7563  
CONNECT 7563 7567 7564 7560 7565  
CONNECT 7567 7569 7563 7570 7568  
CONNECT 7559 7558  
CONNECT 7561 7560  
CONNECT 7562 7560  
CONNECT 7564 7563  
CONNECT 7566 7565  
CONNECT 7568 7567  
CONNECT 7569 7567  
CONNECT 7570 7567  
CONNECT 7558 7560 7559  
CONNECT 7565 7563 7566  
CONNECT 7573 7574 7571 7576 7575  
CONNECT 7576 7578 7580 7577 7573  
CONNECT 7580 7582 7581 7576 7583  
CONNECT 7572 7571  
CONNECT 7574 7573  
CONNECT 7575 7573  
CONNECT 7577 7576  
CONNECT 7579 7578  
CONNECT 7581 7580  
CONNECT 7582 7580  
CONNECT 7583 7580  
CONNECT 7571 7573 7572  
CONNECT 7578 7579 7576  
CONNECT 7586 7589 7588 7587 7584  
CONNECT 7589 7593 7591 7586 7590  
CONNECT 7593 7596 7589 7594 7595  
CONNECT 7585 7584  
CONNECT 7587 7586  
CONNECT 7588 7586  
CONNECT 7590 7589  
CONNECT 7592 7591  
CONNECT 7594 7593  
CONNECT 7595 7593  
CONNECT 7596 7593  
CONNECT 7584 7586 7585  
CONNECT 7591 7592 7589  
CONNECT 7599 7602 7597 7601 7600  
CONNECT 7602 7599 7606 7603 7604

CONNECT 7606 7602 7608 7607 7609  
CONNECT 7598 7597  
CONNECT 7600 7599  
CONNECT 7601 7599  
CONNECT 7603 7602  
CONNECT 7605 7604  
CONNECT 7607 7606  
CONNECT 7608 7606  
CONNECT 7609 7606  
CONNECT 7597 7599 7598  
CONNECT 7604 7602 7605  
CONNECT 7612 7610 7614 7615 7613  
CONNECT 7615 7616 7619 7617 7612  
CONNECT 7619 7615 7621 7620 7622  
CONNECT 7611 7610  
CONNECT 7613 7612  
CONNECT 7614 7612  
CONNECT 7616 7615  
CONNECT 7618 7617  
CONNECT 7620 7619  
CONNECT 7621 7619  
CONNECT 7622 7619  
CONNECT 7610 7611 7612  
CONNECT 7617 7615 7618  
CONNECT 7625 7627 7628 7623 7626  
CONNECT 7628 7632 7625 7630 7629  
CONNECT 7632 7635 7634 7633 7628  
CONNECT 7624 7623  
CONNECT 7626 7625  
CONNECT 7627 7625  
CONNECT 7629 7628  
CONNECT 7631 7630  
CONNECT 7633 7632  
CONNECT 7634 7632  
CONNECT 7635 7632  
CONNECT 7623 7625 7624  
CONNECT 7630 7628 7631  
CONNECT 7638 7640 7641 7639 7636  
CONNECT 7641 7642 7638 7643 7645  
CONNECT 7645 7648 7647 7641 7646  
CONNECT 7637 7636  
CONNECT 7639 7638  
CONNECT 7640 7638  
CONNECT 7642 7641  
CONNECT 7644 7643  
CONNECT 7646 7645  
CONNECT 7647 7645  
CONNECT 7648 7645  
CONNECT 7636 7638 7637  
CONNECT 7643 7641 7644  
CONNECT 7651 7654 7653 7652 7649  
CONNECT 7654 7658 7656 7651 7655  
CONNECT 7658 7659 7654 7660 7661  
CONNECT 7650 7649  
CONNECT 7652 7651  
CONNECT 7653 7651  
CONNECT 7655 7654

CONNECT 7657 7656  
CONNECT 7659 7658  
CONNECT 7660 7658  
CONNECT 7661 7658  
CONNECT 7649 7651 7650  
CONNECT 7656 7654 7657  
CONNECT 7664 7662 7666 7667 7665  
CONNECT 7667 7668 7664 7669 7671  
CONNECT 7671 7667 7672 7674 7673  
CONNECT 7663 7662  
CONNECT 7665 7664  
CONNECT 7666 7664  
CONNECT 7668 7667  
CONNECT 7670 7669  
CONNECT 7672 7671  
CONNECT 7673 7671  
CONNECT 7674 7671  
CONNECT 7662 7664 7663  
CONNECT 7669 7667 7670  
CONNECT 7677 7680 7675 7679 7678  
CONNECT 7680 7684 7681 7677 7682  
CONNECT 7684 7685 7686 7687 7680  
CONNECT 7676 7675  
CONNECT 7678 7677  
CONNECT 7679 7677  
CONNECT 7681 7680  
CONNECT 7683 7682  
CONNECT 7685 7684  
CONNECT 7686 7684  
CONNECT 7687 7684  
CONNECT 7675 7677 7676  
CONNECT 7682 7680 7683  
CONNECT 7690 7691 7688 7693 7692  
CONNECT 7693 7694 7690 7697 7695  
CONNECT 7697 7693 7700 7699 7698  
CONNECT 7689 7688  
CONNECT 7691 7690  
CONNECT 7692 7690  
CONNECT 7694 7693  
CONNECT 7696 7695  
CONNECT 7698 7697  
CONNECT 7699 7697  
CONNECT 7700 7697  
CONNECT 7688 7689 7690  
CONNECT 7695 7696 7693  
CONNECT 7703 7704 7701 7706 7705  
CONNECT 7706 7703 7707 7710 7708  
CONNECT 7710 7712 7713 7706 7711  
CONNECT 7702 7701  
CONNECT 7704 7703  
CONNECT 7705 7703  
CONNECT 7707 7706  
CONNECT 7709 7708  
CONNECT 7711 7710  
CONNECT 7712 7710  
CONNECT 7713 7710  
CONNECT 7701 7703 7702

CONNECT 7708 7709 7706  
CONNECT 7716 7719 7717 7718 7714  
CONNECT 7719 7721 7723 7720 7716  
CONNECT 7723 7725 7726 7719 7724  
CONNECT 7715 7714  
CONNECT 7717 7716  
CONNECT 7718 7716  
CONNECT 7720 7719  
CONNECT 7722 7721  
CONNECT 7724 7723  
CONNECT 7725 7723  
CONNECT 7726 7723  
CONNECT 7714 7715 7716  
CONNECT 7721 7719 7722  
CONNECT 7729 7727 7731 7730 7732  
CONNECT 7732 7734 7729 7733 7736  
CONNECT 7736 7732 7738 7737 7739  
CONNECT 7728 7727  
CONNECT 7730 7729  
CONNECT 7731 7729  
CONNECT 7733 7732  
CONNECT 7735 7734  
CONNECT 7737 7736  
CONNECT 7738 7736  
CONNECT 7739 7736  
CONNECT 7727 7729 7728  
CONNECT 7734 7735 7732  
CONNECT 7742 7743 7745 7744 7740  
CONNECT 7745 7749 7746 7747 7742  
CONNECT 7749 7745 7750 7752 7751  
CONNECT 7741 7740  
CONNECT 7743 7742  
CONNECT 7744 7742  
CONNECT 7746 7745  
CONNECT 7748 7747  
CONNECT 7750 7749  
CONNECT 7751 7749  
CONNECT 7752 7749  
CONNECT 7740 7742 7741  
CONNECT 7747 7745 7748  
CONNECT 7755 7756 7758 7753 7757  
CONNECT 7758 7760 7762 7759 7755  
CONNECT 7762 7758 7765 7764 7763  
CONNECT 7754 7753  
CONNECT 7756 7755  
CONNECT 7757 7755  
CONNECT 7759 7758  
CONNECT 7761 7760  
CONNECT 7763 7762  
CONNECT 7764 7762  
CONNECT 7765 7762  
CONNECT 7753 7754 7755  
CONNECT 7760 7758 7761  
CONNECT 7768 7766 7769 7771 7770  
CONNECT 7771 7772 7768 7775 7773  
CONNECT 7775 7778 7771 7777 7776  
CONNECT 7767 7766

CONNECT 7769 7768  
CONNECT 7770 7768  
CONNECT 7772 7771  
CONNECT 7774 7773  
CONNECT 7776 7775  
CONNECT 7777 7775  
CONNECT 7778 7775  
CONNECT 7766 7767 7768  
CONNECT 7773 7774 7771  
CONNECT 7781 7782 7783 7784 7779  
CONNECT 7784 7786 7781 7788 7785  
CONNECT 7788 7784 7791 7790 7789  
CONNECT 7780 7779  
CONNECT 7782 7781  
CONNECT 7783 7781  
CONNECT 7785 7784  
CONNECT 7787 7786  
CONNECT 7789 7788  
CONNECT 7790 7788  
CONNECT 7791 7788  
CONNECT 7779 7781 7780  
CONNECT 7786 7787 7784  
CONNECT 7794 7795 7796 7797 7792  
CONNECT 7797 7794 7801 7798 7799  
CONNECT 7801 7803 7802 7797 7804  
CONNECT 7793 7792  
CONNECT 7795 7794  
CONNECT 7796 7794  
CONNECT 7798 7797  
CONNECT 7800 7799  
CONNECT 7802 7801  
CONNECT 7803 7801  
CONNECT 7804 7801  
CONNECT 7792 7794 7793  
CONNECT 7799 7797 7800  
CONNECT 7807 7810 7809 7808 7805  
CONNECT 7810 7811 7807 7812 7814  
CONNECT 7814 7816 7817 7810 7815  
CONNECT 7806 7805  
CONNECT 7808 7807  
CONNECT 7809 7807  
CONNECT 7811 7810  
CONNECT 7813 7812  
CONNECT 7815 7814  
CONNECT 7816 7814  
CONNECT 7817 7814  
CONNECT 7805 7807 7806  
CONNECT 7812 7810 7813  
CONNECT 7820 7823 7822 7821 7818  
CONNECT 7823 7820 7824 7825 7827  
CONNECT 7827 7823 7829 7830 7828  
CONNECT 7819 7818  
CONNECT 7821 7820  
CONNECT 7822 7820  
CONNECT 7824 7823  
CONNECT 7826 7825  
CONNECT 7828 7827

CONNECT 7829 7827  
CONNECT 7830 7827  
CONNECT 7818 7820 7819  
CONNECT 7825 7823 7826  
CONNECT 7833 7836 7835 7834 7831  
CONNECT 7836 7840 7838 7837 7833  
CONNECT 7840 7841 7843 7836 7842  
CONNECT 7832 7831  
CONNECT 7834 7833  
CONNECT 7835 7833  
CONNECT 7837 7836  
CONNECT 7839 7838  
CONNECT 7841 7840  
CONNECT 7842 7840  
CONNECT 7843 7840  
CONNECT 7831 7832 7833  
CONNECT 7838 7836 7839  
CONNECT 7846 7847 7844 7849 7848  
CONNECT 7849 7851 7850 7846 7853  
CONNECT 7853 7855 7856 7849 7854  
CONNECT 7845 7844  
CONNECT 7847 7846  
CONNECT 7848 7846  
CONNECT 7850 7849  
CONNECT 7852 7851  
CONNECT 7854 7853  
CONNECT 7855 7853  
CONNECT 7856 7853  
CONNECT 7844 7845 7846  
CONNECT 7851 7849 7852  
CONNECT 7859 7862 7861 7860 7857  
CONNECT 7862 7859 7864 7863 7866  
CONNECT 7866 7862 7868 7869 7867  
CONNECT 7858 7857  
CONNECT 7860 7859  
CONNECT 7861 7859  
CONNECT 7863 7862  
CONNECT 7865 7864  
CONNECT 7867 7866  
CONNECT 7868 7866  
CONNECT 7869 7866  
CONNECT 7857 7859 7858  
CONNECT 7864 7862 7865  
CONNECT 7872 7874 7870 7875 7873  
CONNECT 7875 7879 7876 7872 7877  
CONNECT 7879 7882 7881 7880 7875  
CONNECT 7871 7870  
CONNECT 7873 7872  
CONNECT 7874 7872  
CONNECT 7876 7875  
CONNECT 7878 7877  
CONNECT 7880 7879  
CONNECT 7881 7879  
CONNECT 7882 7879  
CONNECT 7870 7872 7871  
CONNECT 7877 7878 7875  
CONNECT 7885 7886 7883 7888 7887



CONNECT 7888 7885 7892 7889 7890  
CONNECT 7892 7893 7894 7895 7888  
CONNECT 7884 7883  
CONNECT 7886 7885  
CONNECT 7887 7885  
CONNECT 7889 7888  
CONNECT 7891 7890  
CONNECT 7893 7892  
CONNECT 7894 7892  
CONNECT 7895 7892  
CONNECT 7883 7885 7884  
CONNECT 7890 7891 7888  
CONNECT 7898 7901 7896 7900 7899  
CONNECT 7901 7903 7905 7902 7898  
CONNECT 7905 7901 7908 7906 7907  
CONNECT 7897 7896  
CONNECT 7899 7898  
CONNECT 7900 7898  
CONNECT 7902 7901  
CONNECT 7904 7903  
CONNECT 7906 7905  
CONNECT 7907 7905  
CONNECT 7908 7905  
CONNECT 7896 7897 7898  
CONNECT 7903 7904 7901  
CONNECT 7911 7914 7912 7913 7909  
CONNECT 7914 7918 7915 7916 7911  
CONNECT 7918 7914 7921 7920 7919  
CONNECT 7910 7909  
CONNECT 7912 7911  
CONNECT 7913 7911  
CONNECT 7915 7914  
CONNECT 7917 7916  
CONNECT 7919 7918  
CONNECT 7920 7918  
CONNECT 7921 7918  
CONNECT 7909 7911 7910  
CONNECT 7916 7914 7917  
CONNECT 7924 7925 7922 7927 7926  
CONNECT 7927 7929 7928 7924 7931  
CONNECT 7931 7934 7933 7932 7927  
CONNECT 7923 7922  
CONNECT 7925 7924  
CONNECT 7926 7924  
CONNECT 7928 7927  
CONNECT 7930 7929  
CONNECT 7932 7931  
CONNECT 7933 7931  
CONNECT 7934 7931  
CONNECT 7922 7924 7923  
CONNECT 7929 7930 7927  
CONNECT 7937 7940 7939 7938 7935  
CONNECT 7940 7942 7944 7937 7941  
CONNECT 7944 7940 7946 7947 7945  
CONNECT 7936 7935  
CONNECT 7938 7937  
CONNECT 7939 7937

CONNECT 7941 7940  
CONNECT 7943 7942  
CONNECT 7945 7944  
CONNECT 7946 7944  
CONNECT 7947 7944  
CONNECT 7935 7937 7936  
CONNECT 7942 7940 7943  
CONNECT 7950 7953 7952 7951 7948  
CONNECT 7953 7954 7957 7955 7950  
CONNECT 7957 7960 7959 7958 7953  
CONNECT 7949 7948  
CONNECT 7951 7950  
CONNECT 7952 7950  
CONNECT 7954 7953  
CONNECT 7956 7955  
CONNECT 7958 7957  
CONNECT 7959 7957  
CONNECT 7960 7957  
CONNECT 7948 7949 7950  
CONNECT 7955 7956 7953  
CONNECT 7963 7964 7965 7961 7966  
CONNECT 7966 7963 7967 7970 7968  
CONNECT 7970 7973 7971 7972 7966  
CONNECT 7962 7961  
CONNECT 7964 7963  
CONNECT 7965 7963  
CONNECT 7967 7966  
CONNECT 7969 7968  
CONNECT 7971 7970  
CONNECT 7972 7970  
CONNECT 7973 7970  
CONNECT 7961 7963 7962  
CONNECT 7968 7969 7966  
CONNECT 7976 7979 7974 7978 7977  
CONNECT 7979 7983 7981 7980 7976  
CONNECT 7983 7979 7985 7986 7984  
CONNECT 7975 7974  
CONNECT 7977 7976  
CONNECT 7978 7976  
CONNECT 7980 7979  
CONNECT 7982 7981  
CONNECT 7984 7983  
CONNECT 7985 7983  
CONNECT 7986 7983  
CONNECT 7974 7976 7975  
CONNECT 7981 7979 7982  
CONNECT 7989 7990 7991 7987 7992  
CONNECT 7992 7993 7989 7994 7996  
CONNECT 7996 7998 7999 7992 7997  
CONNECT 7988 7987  
CONNECT 7990 7989  
CONNECT 7991 7989  
CONNECT 7993 7992  
CONNECT 7995 7994  
CONNECT 7997 7996  
CONNECT 7998 7996  
CONNECT 7999 7996

CONNECT 7987 7989 7988  
CONNECT 7994 7995 7992  
CONNECT 8002 8000 8005 8004 8003  
CONNECT 8005 8009 8006 8002 8007  
CONNECT 8009 8012 8005 8011 8010  
CONNECT 8001 8000  
CONNECT 8003 8002  
CONNECT 8004 8002  
CONNECT 8006 8005  
CONNECT 8008 8007  
CONNECT 8010 8009  
CONNECT 8011 8009  
CONNECT 8012 8009  
CONNECT 8000 8001 8002  
CONNECT 8007 8008 8005  
CONNECT 8015 8018 8016 8013 8017  
CONNECT 8018 8015 8022 8020 8019  
CONNECT 8022 8023 8018 8024 8025  
CONNECT 8014 8013  
CONNECT 8016 8015  
CONNECT 8017 8015  
CONNECT 8019 8018  
CONNECT 8021 8020  
CONNECT 8023 8022  
CONNECT 8024 8022  
CONNECT 8025 8022  
CONNECT 8013 8015 8014  
CONNECT 8020 8018 8021  
CONNECT 8028 8031 8030 8029 8026  
CONNECT 8031 8035 8033 8032 8028  
CONNECT 8035 8037 8036 8031 8038  
CONNECT 8027 8026  
CONNECT 8029 8028  
CONNECT 8030 8028  
CONNECT 8032 8031  
CONNECT 8034 8033  
CONNECT 8036 8035  
CONNECT 8037 8035  
CONNECT 8038 8035  
CONNECT 8026 8028 8027  
CONNECT 8033 8031 8034  
CONNECT 8041 8042 8043 8044 8039  
CONNECT 8044 8048 8046 8045 8041  
CONNECT 8048 8051 8050 8049 8044  
CONNECT 8040 8039  
CONNECT 8042 8041  
CONNECT 8043 8041  
CONNECT 8045 8044  
CONNECT 8047 8046  
CONNECT 8049 8048  
CONNECT 8050 8048  
CONNECT 8051 8048  
CONNECT 8039 8040 8041  
CONNECT 8046 8047 8044  
CONNECT 8054 8052 8057 8056 8055  
CONNECT 8057 8059 8054 8061 8058  
CONNECT 8061 8057 8064 8063 8062

CONNECT 8053 8052  
CONNECT 8055 8054  
CONNECT 8056 8054  
CONNECT 8058 8057  
CONNECT 8060 8059  
CONNECT 8062 8061  
CONNECT 8063 8061  
CONNECT 8064 8061  
CONNECT 8052 8053 8054  
CONNECT 8059 8057 8060  
CONNECT 8067 8070 8069 8065 8068  
CONNECT 8070 8072 8067 8071 8074  
CONNECT 8074 8076 8075 8077 8070  
CONNECT 8066 8065  
CONNECT 8068 8067  
CONNECT 8069 8067  
CONNECT 8071 8070  
CONNECT 8073 8072  
CONNECT 8075 8074  
CONNECT 8076 8074  
CONNECT 8077 8074  
CONNECT 8065 8066 8067  
CONNECT 8072 8073 8070  
CONNECT 8080 8082 8083 8081 8078  
CONNECT 8083 8084 8087 8085 8080  
CONNECT 8087 8090 8088 8089 8083  
CONNECT 8079 8078  
CONNECT 8081 8080  
CONNECT 8082 8080  
CONNECT 8084 8083  
CONNECT 8086 8085  
CONNECT 8088 8087  
CONNECT 8089 8087  
CONNECT 8090 8087  
CONNECT 8078 8080 8079  
CONNECT 8085 8086 8083  
CONNECT 8093 8096 8095 8094 8091  
CONNECT 8096 8098 8097 8100 8093  
CONNECT 8100 8096 8103 8102 8101  
CONNECT 8092 8091  
CONNECT 8094 8093  
CONNECT 8095 8093  
CONNECT 8097 8096  
CONNECT 8099 8098  
CONNECT 8101 8100  
CONNECT 8102 8100  
CONNECT 8103 8100  
CONNECT 8091 8092 8093  
CONNECT 8098 8096 8099  
CONNECT 8106 8109 8108 8104 8107  
CONNECT 8109 8113 8111 8110 8106  
CONNECT 8113 8114 8109 8115 8116  
CONNECT 8105 8104  
CONNECT 8107 8106  
CONNECT 8108 8106  
CONNECT 8110 8109  
CONNECT 8112 8111

CONNECT 8114 8113  
CONNECT 8115 8113  
CONNECT 8116 8113  
CONNECT 8104 8106 8105  
CONNECT 8111 8112 8109  
CONNECT 8119 8120 8122 8121 8117  
CONNECT 8122 8124 8123 8126 8119  
CONNECT 8126 8122 8128 8127 8129  
CONNECT 8118 8117  
CONNECT 8120 8119  
CONNECT 8121 8119  
CONNECT 8123 8122  
CONNECT 8125 8124  
CONNECT 8127 8126  
CONNECT 8128 8126  
CONNECT 8129 8126  
CONNECT 8117 8118 8119  
CONNECT 8124 8122 8125  
CONNECT 8132 8134 8135 8133 8130  
CONNECT 8135 8132 8139 8136 8137  
CONNECT 8139 8140 8135 8142 8141  
CONNECT 8131 8130  
CONNECT 8133 8132  
CONNECT 8134 8132  
CONNECT 8136 8135  
CONNECT 8138 8137  
CONNECT 8140 8139  
CONNECT 8141 8139  
CONNECT 8142 8139  
CONNECT 8130 8132 8131  
CONNECT 8137 8135 8138  
CONNECT 8145 8148 8147 8143 8146  
CONNECT 8148 8145 8152 8150 8149  
CONNECT 8152 8148 8155 8154 8153  
CONNECT 8144 8143  
CONNECT 8146 8145  
CONNECT 8147 8145  
CONNECT 8149 8148  
CONNECT 8151 8150  
CONNECT 8153 8152  
CONNECT 8154 8152  
CONNECT 8155 8152  
CONNECT 8143 8145 8144  
CONNECT 8150 8148 8151  
CONNECT 8158 8161 8160 8159 8156  
CONNECT 8161 8163 8158 8165 8162  
CONNECT 8165 8161 8167 8166 8168  
CONNECT 8157 8156  
CONNECT 8159 8158  
CONNECT 8160 8158  
CONNECT 8162 8161  
CONNECT 8164 8163  
CONNECT 8166 8165  
CONNECT 8167 8165  
CONNECT 8168 8165  
CONNECT 8156 8158 8157  
CONNECT 8163 8161 8164

CONNECT 8171 8172 8174 8169 8173  
CONNECT 8174 8171 8178 8176 8175  
CONNECT 8178 8179 8174 8181 8180  
CONNECT 8170 8169  
CONNECT 8172 8171  
CONNECT 8173 8171  
CONNECT 8175 8174  
CONNECT 8177 8176  
CONNECT 8179 8178  
CONNECT 8180 8178  
CONNECT 8181 8178  
CONNECT 8169 8170 8171  
CONNECT 8176 8174 8177  
CONNECT 8184 8187 8185 8182 8186  
CONNECT 8187 8191 8184 8189 8188  
CONNECT 8191 8192 8187 8194 8193  
CONNECT 8183 8182  
CONNECT 8185 8184  
CONNECT 8186 8184  
CONNECT 8188 8187  
CONNECT 8190 8189  
CONNECT 8192 8191  
CONNECT 8193 8191  
CONNECT 8194 8191  
CONNECT 8182 8184 8183  
CONNECT 8189 8190 8187  
CONNECT 8197 8200 8199 8198 8195  
CONNECT 8200 8197 8201 8202 8204  
CONNECT 8204 8206 8200 8207 8205  
CONNECT 8196 8195  
CONNECT 8198 8197  
CONNECT 8199 8197  
CONNECT 8201 8200  
CONNECT 8203 8202  
CONNECT 8205 8204  
CONNECT 8206 8204  
CONNECT 8207 8204  
CONNECT 8195 8197 8196  
CONNECT 8202 8200 8203  
CONNECT 8210 8208 8213 8212 8211  
CONNECT 8213 8210 8217 8214 8215  
CONNECT 8217 8219 8218 8213 8220  
CONNECT 8209 8208  
CONNECT 8211 8210  
CONNECT 8212 8210  
CONNECT 8214 8213  
CONNECT 8216 8215  
CONNECT 8218 8217  
CONNECT 8219 8217  
CONNECT 8220 8217  
CONNECT 8208 8210 8209  
CONNECT 8215 8216 8213  
CONNECT 8223 8221 8225 8224 8226  
CONNECT 8226 8227 8223 8230 8228  
CONNECT 8230 8233 8232 8231 8226  
CONNECT 8222 8221  
CONNECT 8224 8223

CONNECT 8225 8223  
CONNECT 8227 8226  
CONNECT 8229 8228  
CONNECT 8231 8230  
CONNECT 8232 8230  
CONNECT 8233 8230  
CONNECT 8221 8222 8223  
CONNECT 8228 8229 8226  
CONNECT 8236 8237 8239 8234 8238  
CONNECT 8239 8243 8241 8236 8240  
CONNECT 8243 8239 8245 8244 8246  
CONNECT 8235 8234  
CONNECT 8237 8236  
CONNECT 8238 8236  
CONNECT 8240 8239  
CONNECT 8242 8241  
CONNECT 8244 8243  
CONNECT 8245 8243  
CONNECT 8246 8243  
CONNECT 8234 8236 8235  
CONNECT 8241 8239 8242  
CONNECT 8249 8250 8247 8251 8252  
CONNECT 8252 8249 8256 8254 8253  
CONNECT 8256 8258 8259 8257 8252  
CONNECT 8248 8247  
CONNECT 8250 8249  
CONNECT 8251 8249  
CONNECT 8253 8252  
CONNECT 8255 8254  
CONNECT 8257 8256  
CONNECT 8258 8256  
CONNECT 8259 8256  
CONNECT 8247 8249 8248  
CONNECT 8254 8255 8252  
CONNECT 8262 8265 8263 8264 8260  
CONNECT 8265 8267 8266 8269 8262  
CONNECT 8269 8271 8265 8272 8270  
CONNECT 8261 8260  
CONNECT 8263 8262  
CONNECT 8264 8262  
CONNECT 8266 8265  
CONNECT 8268 8267  
CONNECT 8270 8269  
CONNECT 8271 8269  
CONNECT 8272 8269  
CONNECT 8260 8261 8262  
CONNECT 8267 8268 8265  
CONNECT 8275 8276 8278 8277 8273  
CONNECT 8278 8275 8279 8280 8282  
CONNECT 8282 8284 8278 8283 8285  
CONNECT 8274 8273  
CONNECT 8276 8275  
CONNECT 8277 8275  
CONNECT 8279 8278  
CONNECT 8281 8280  
CONNECT 8283 8282  
CONNECT 8284 8282

CONNECT 8285 8282  
CONNECT 8273 8275 8274  
CONNECT 8280 8278 8281  
CONNECT 8288 8289 8286 8290 8291  
CONNECT 8291 8288 8295 8293 8292  
CONNECT 8295 8296 8297 8291 8298  
CONNECT 8287 8286  
CONNECT 8289 8288  
CONNECT 8290 8288  
CONNECT 8292 8291  
CONNECT 8294 8293  
CONNECT 8296 8295  
CONNECT 8297 8295  
CONNECT 8298 8295  
CONNECT 8286 8288 8287  
CONNECT 8293 8294 8291  
CONNECT 8301 8302 8304 8303 8299  
CONNECT 8304 8305 8308 8306 8301  
CONNECT 8308 8311 8304 8310 8309  
CONNECT 8300 8299  
CONNECT 8302 8301  
CONNECT 8303 8301  
CONNECT 8305 8304  
CONNECT 8307 8306  
CONNECT 8309 8308  
CONNECT 8310 8308  
CONNECT 8311 8308  
CONNECT 8299 8300 8301  
CONNECT 8306 8307 8304  
CONNECT 8314 8316 8317 8312 8315  
CONNECT 8317 8318 8321 8314 8319  
CONNECT 8321 8323 8317 8324 8322  
CONNECT 8313 8312  
CONNECT 8315 8314  
CONNECT 8316 8314  
CONNECT 8318 8317  
CONNECT 8320 8319  
CONNECT 8322 8321  
CONNECT 8323 8321  
CONNECT 8324 8321  
CONNECT 8312 8313 8314  
CONNECT 8319 8317 8320  
CONNECT 8327 8325 8330 8328 8329  
CONNECT 8330 8331 8327 8334 8332  
CONNECT 8334 8337 8330 8335 8336  
CONNECT 8326 8325  
CONNECT 8328 8327  
CONNECT 8329 8327  
CONNECT 8331 8330  
CONNECT 8333 8332  
CONNECT 8335 8334  
CONNECT 8336 8334  
CONNECT 8337 8334  
CONNECT 8325 8327 8326  
CONNECT 8332 8333 8330  
CONNECT 8340 8341 8343 8342 8338  
CONNECT 8343 8340 8347 8345 8344



CONNECT 8347 8350 8349 8343 8348  
CONNECT 8339 8338  
CONNECT 8341 8340  
CONNECT 8342 8340  
CONNECT 8344 8343  
CONNECT 8346 8345  
CONNECT 8348 8347  
CONNECT 8349 8347  
CONNECT 8350 8347  
CONNECT 8338 8340 8339  
CONNECT 8345 8343 8346  
CONNECT 8353 8355 8351 8354 8356  
CONNECT 8356 8360 8357 8358 8353  
CONNECT 8360 8362 8356 8363 8361  
CONNECT 8352 8351  
CONNECT 8354 8353  
CONNECT 8355 8353  
CONNECT 8357 8356  
CONNECT 8359 8358  
CONNECT 8361 8360  
CONNECT 8362 8360  
CONNECT 8363 8360  
CONNECT 8351 8352 8353  
CONNECT 8358 8359 8356  
CONNECT 8366 8367 8369 8368 8364  
CONNECT 8369 8373 8371 8370 8366  
CONNECT 8373 8376 8374 8369 8375  
CONNECT 8365 8364  
CONNECT 8367 8366  
CONNECT 8368 8366  
CONNECT 8370 8369  
CONNECT 8372 8371  
CONNECT 8374 8373  
CONNECT 8375 8373  
CONNECT 8376 8373  
CONNECT 8364 8365 8366  
CONNECT 8371 8372 8369  
CONNECT 8379 8377 8382 8381 8380  
CONNECT 8382 8379 8384 8386 8383  
CONNECT 8386 8388 8389 8387 8382  
CONNECT 8378 8377  
CONNECT 8380 8379  
CONNECT 8381 8379  
CONNECT 8383 8382  
CONNECT 8385 8384  
CONNECT 8387 8386  
CONNECT 8388 8386  
CONNECT 8389 8386  
CONNECT 8377 8378 8379  
CONNECT 8384 8385 8382  
CONNECT 8392 8395 8394 8390 8393  
CONNECT 8395 8392 8397 8399 8396  
CONNECT 8399 8400 8395 8401 8402  
CONNECT 8391 8390  
CONNECT 8393 8392  
CONNECT 8394 8392  
CONNECT 8396 8395

CONNECT 8398 8397  
CONNECT 8400 8399  
CONNECT 8401 8399  
CONNECT 8402 8399  
CONNECT 8390 8391 8392  
CONNECT 8397 8395 8398  
CONNECT 8405 8406 8403 8407 8408  
CONNECT 8408 8410 8405 8412 8409  
CONNECT 8412 8414 8415 8413 8408  
CONNECT 8404 8403  
CONNECT 8406 8405  
CONNECT 8407 8405  
CONNECT 8409 8408  
CONNECT 8411 8410  
CONNECT 8413 8412  
CONNECT 8414 8412  
CONNECT 8415 8412  
CONNECT 8403 8405 8404  
CONNECT 8410 8411 8408  
CONNECT 8418 8421 8416 8420 8419  
CONNECT 8421 8423 8425 8422 8418  
CONNECT 8425 8427 8428 8421 8426  
CONNECT 8417 8416  
CONNECT 8419 8418  
CONNECT 8420 8418  
CONNECT 8422 8421  
CONNECT 8424 8423  
CONNECT 8426 8425  
CONNECT 8427 8425  
CONNECT 8428 8425  
CONNECT 8416 8418 8417  
CONNECT 8423 8424 8421  
CONNECT 8431 8434 8432 8433 8429  
CONNECT 8434 8436 8438 8435 8431  
CONNECT 8438 8434 8439 8441 8440  
CONNECT 8430 8429  
CONNECT 8432 8431  
CONNECT 8433 8431  
CONNECT 8435 8434  
CONNECT 8437 8436  
CONNECT 8439 8438  
CONNECT 8440 8438  
CONNECT 8441 8438  
CONNECT 8429 8431 8430  
CONNECT 8436 8434 8437  
CONNECT 8444 8442 8447 8446 8445  
CONNECT 8447 8451 8448 8449 8444  
CONNECT 8451 8454 8453 8452 8447  
CONNECT 8443 8442  
CONNECT 8445 8444  
CONNECT 8446 8444  
CONNECT 8448 8447  
CONNECT 8450 8449  
CONNECT 8452 8451  
CONNECT 8453 8451  
CONNECT 8454 8451  
CONNECT 8442 8444 8443

CONNECT 8449 8450 8447  
CONNECT 8457 8460 8458 8455 8459  
CONNECT 8460 8462 8464 8461 8457  
CONNECT 8464 8467 8465 8460 8466  
CONNECT 8456 8455  
CONNECT 8458 8457  
CONNECT 8459 8457  
CONNECT 8461 8460  
CONNECT 8463 8462  
CONNECT 8465 8464  
CONNECT 8466 8464  
CONNECT 8467 8464  
CONNECT 8455 8457 8456  
CONNECT 8462 8463 8460  
CONNECT 8470 8471 8473 8472 8468  
CONNECT 8473 8477 8475 8474 8470  
CONNECT 8477 8479 8473 8480 8478  
CONNECT 8469 8468  
CONNECT 8471 8470  
CONNECT 8472 8470  
CONNECT 8474 8473  
CONNECT 8476 8475  
CONNECT 8478 8477  
CONNECT 8479 8477  
CONNECT 8480 8477  
CONNECT 8468 8469 8470  
CONNECT 8475 8476 8473  
CONNECT 8483 8484 8486 8481 8485  
CONNECT 8486 8490 8488 8483 8487  
CONNECT 8490 8493 8492 8486 8491  
CONNECT 8482 8481  
CONNECT 8484 8483  
CONNECT 8485 8483  
CONNECT 8487 8486  
CONNECT 8489 8488  
CONNECT 8491 8490  
CONNECT 8492 8490  
CONNECT 8493 8490  
CONNECT 8481 8483 8482  
CONNECT 8488 8489 8486  
CONNECT 8496 8494 8497 8499 8498  
CONNECT 8499 8501 8503 8500 8496  
CONNECT 8503 8504 8506 8505 8499  
CONNECT 8495 8494  
CONNECT 8497 8496  
CONNECT 8498 8496  
CONNECT 8500 8499  
CONNECT 8502 8501  
CONNECT 8504 8503  
CONNECT 8505 8503  
CONNECT 8506 8503  
CONNECT 8494 8495 8496  
CONNECT 8501 8502 8499  
CONNECT 8509 8512 8510 8507 8511  
CONNECT 8512 8514 8513 8509 8516  
CONNECT 8516 8512 8519 8518 8517  
CONNECT 8508 8507

CONNECT 8510 8509  
CONNECT 8511 8509  
CONNECT 8513 8512  
CONNECT 8515 8514  
CONNECT 8517 8516  
CONNECT 8518 8516  
CONNECT 8519 8516  
CONNECT 8507 8509 8508  
CONNECT 8514 8515 8512  
CONNECT 8522 8524 8523 8520 8525  
CONNECT 8525 8529 8526 8522 8527  
CONNECT 8529 8532 8530 8531 8525  
CONNECT 8521 8520  
CONNECT 8523 8522  
CONNECT 8524 8522  
CONNECT 8526 8525  
CONNECT 8528 8527  
CONNECT 8530 8529  
CONNECT 8531 8529  
CONNECT 8532 8529  
CONNECT 8520 8521 8522  
CONNECT 8527 8528 8525  
CONNECT 8535 8533 8536 8538 8537  
CONNECT 8538 8535 8542 8540 8539  
CONNECT 8542 8545 8543 8538 8544  
CONNECT 8534 8533  
CONNECT 8536 8535  
CONNECT 8537 8535  
CONNECT 8539 8538  
CONNECT 8541 8540  
CONNECT 8543 8542  
CONNECT 8544 8542  
CONNECT 8545 8542  
CONNECT 8533 8535 8534  
CONNECT 8540 8538 8541  
CONNECT 8548 8550 8546 8551 8549  
CONNECT 8551 8548 8553 8552 8555  
CONNECT 8555 8556 8558 8557 8551  
CONNECT 8547 8546  
CONNECT 8549 8548  
CONNECT 8550 8548  
CONNECT 8552 8551  
CONNECT 8554 8553  
CONNECT 8556 8555  
CONNECT 8557 8555  
CONNECT 8558 8555  
CONNECT 8546 8548 8547  
CONNECT 8553 8554 8551  
CONNECT 8561 8563 8559 8564 8562  
CONNECT 8564 8568 8566 8565 8561  
CONNECT 8568 8571 8570 8569 8564  
CONNECT 8560 8559  
CONNECT 8562 8561  
CONNECT 8563 8561  
CONNECT 8565 8564  
CONNECT 8567 8566  
CONNECT 8569 8568

CONNECT 8570 8568  
CONNECT 8571 8568  
CONNECT 8559 8560 8561  
CONNECT 8566 8567 8564  
CONNECT 8574 8577 8576 8575 8572  
CONNECT 8577 8578 8574 8579 8581  
CONNECT 8581 8577 8584 8583 8582  
CONNECT 8573 8572  
CONNECT 8575 8574  
CONNECT 8576 8574  
CONNECT 8578 8577  
CONNECT 8580 8579  
CONNECT 8582 8581  
CONNECT 8583 8581  
CONNECT 8584 8581  
CONNECT 8572 8574 8573  
CONNECT 8579 8577 8580  
CONNECT 8587 8589 8585 8590 8588  
CONNECT 8590 8591 8594 8592 8587  
CONNECT 8594 8595 8597 8596 8590  
CONNECT 8586 8585  
CONNECT 8588 8587  
CONNECT 8589 8587  
CONNECT 8591 8590  
CONNECT 8593 8592  
CONNECT 8595 8594  
CONNECT 8596 8594  
CONNECT 8597 8594  
CONNECT 8585 8586 8587  
CONNECT 8592 8593 8590  
CONNECT 8600 8598 8601 8603 8602  
CONNECT 8603 8607 8600 8605 8604  
CONNECT 8607 8610 8609 8608 8603  
CONNECT 8599 8598  
CONNECT 8601 8600  
CONNECT 8602 8600  
CONNECT 8604 8603  
CONNECT 8606 8605  
CONNECT 8608 8607  
CONNECT 8609 8607  
CONNECT 8610 8607  
CONNECT 8598 8599 8600  
CONNECT 8605 8606 8603  
CONNECT 8613 8616 8615 8614 8611  
CONNECT 8616 8620 8618 8617 8613  
CONNECT 8620 8623 8622 8621 8616  
CONNECT 8612 8611  
CONNECT 8614 8613  
CONNECT 8615 8613  
CONNECT 8617 8616  
CONNECT 8619 8618  
CONNECT 8621 8620  
CONNECT 8622 8620  
CONNECT 8623 8620  
CONNECT 8611 8613 8612  
CONNECT 8618 8616 8619  
CONNECT 8626 8627 8629 8628 8624

CONNECT 8629 8633 8631 8630 8626  
CONNECT 8633 8634 8636 8635 8629  
CONNECT 8625 8624  
CONNECT 8627 8626  
CONNECT 8628 8626  
CONNECT 8630 8629  
CONNECT 8632 8631  
CONNECT 8634 8633  
CONNECT 8635 8633  
CONNECT 8636 8633  
CONNECT 8624 8625 8626  
CONNECT 8631 8629 8632  
CONNECT 8639 8637 8642 8641 8640  
CONNECT 8642 8644 8643 8639 8646  
CONNECT 8646 8649 8647 8642 8648  
CONNECT 8638 8637  
CONNECT 8640 8639  
CONNECT 8641 8639  
CONNECT 8643 8642  
CONNECT 8645 8644  
CONNECT 8647 8646  
CONNECT 8648 8646  
CONNECT 8649 8646  
CONNECT 8637 8639 8638  
CONNECT 8644 8645 8642  
CONNECT 8652 8654 8653 8655 8650  
CONNECT 8655 8656 8652 8657 8659  
CONNECT 8659 8662 8661 8660 8655  
CONNECT 8651 8650  
CONNECT 8653 8652  
CONNECT 8654 8652  
CONNECT 8656 8655  
CONNECT 8658 8657  
CONNECT 8660 8659  
CONNECT 8661 8659  
CONNECT 8662 8659  
CONNECT 8650 8652 8651  
CONNECT 8657 8658 8655  
CONNECT 8665 8663 8668 8667 8666  
CONNECT 8668 8665 8672 8670 8669  
CONNECT 8672 8674 8675 8673 8668  
CONNECT 8664 8663  
CONNECT 8666 8665  
CONNECT 8667 8665  
CONNECT 8669 8668  
CONNECT 8671 8670  
CONNECT 8673 8672  
CONNECT 8674 8672  
CONNECT 8675 8672  
CONNECT 8663 8665 8664  
CONNECT 8670 8671 8668  
CONNECT 8678 8681 8680 8676 8679  
CONNECT 8681 8685 8682 8678 8683  
CONNECT 8685 8686 8681 8687 8688  
CONNECT 8677 8676  
CONNECT 8679 8678  
CONNECT 8680 8678

CONNECT 8682 8681  
CONNECT 8684 8683  
CONNECT 8686 8685  
CONNECT 8687 8685  
CONNECT 8688 8685  
CONNECT 8676 8678 8677  
CONNECT 8683 8684 8681  
CONNECT 8691 8694 8689 8692 8693  
CONNECT 8694 8698 8695 8696 8691  
CONNECT 8698 8694 8701 8700 8699  
CONNECT 8690 8689  
CONNECT 8692 8691  
CONNECT 8693 8691  
CONNECT 8695 8694  
CONNECT 8697 8696  
CONNECT 8699 8698  
CONNECT 8700 8698  
CONNECT 8701 8698  
CONNECT 8689 8690 8691  
CONNECT 8696 8694 8697  
CONNECT 8704 8707 8706 8705 8702  
CONNECT 8707 8709 8704 8711 8708  
CONNECT 8711 8707 8712 8714 8713  
CONNECT 8703 8702  
CONNECT 8705 8704  
CONNECT 8706 8704  
CONNECT 8708 8707  
CONNECT 8710 8709  
CONNECT 8712 8711  
CONNECT 8713 8711  
CONNECT 8714 8711  
CONNECT 8702 8703 8704  
CONNECT 8709 8707 8710  
CONNECT 8717 8718 8720 8715 8719  
CONNECT 8720 8724 8722 8721 8717  
CONNECT 8724 8727 8725 8726 8720  
CONNECT 8716 8715  
CONNECT 8718 8717  
CONNECT 8719 8717  
CONNECT 8721 8720  
CONNECT 8723 8722  
CONNECT 8725 8724  
CONNECT 8726 8724  
CONNECT 8727 8724  
CONNECT 8715 8717 8716  
CONNECT 8722 8720 8723  
CONNECT 8730 8728 8733 8732 8731  
CONNECT 8733 8737 8735 8730 8734  
CONNECT 8737 8738 8740 8739 8733  
CONNECT 8729 8728  
CONNECT 8731 8730  
CONNECT 8732 8730  
CONNECT 8734 8733  
CONNECT 8736 8735  
CONNECT 8738 8737  
CONNECT 8739 8737  
CONNECT 8740 8737

CONNECT 8728 8730 8729  
CONNECT 8735 8736 8733  
CONNECT 8743 8746 8745 8744 8741  
CONNECT 8746 8750 8748 8747 8743  
CONNECT 8750 8746 8752 8753 8751  
CONNECT 8742 8741  
CONNECT 8744 8743  
CONNECT 8745 8743  
CONNECT 8747 8746  
CONNECT 8749 8748  
CONNECT 8751 8750  
CONNECT 8752 8750  
CONNECT 8753 8750  
CONNECT 8741 8743 8742  
CONNECT 8748 8746 8749  
CONNECT 8756 8757 8754 8758 8759  
CONNECT 8759 8760 8761 8756 8763  
CONNECT 8763 8764 8766 8765 8759  
CONNECT 8755 8754  
CONNECT 8757 8756  
CONNECT 8758 8756  
CONNECT 8760 8759  
CONNECT 8762 8761  
CONNECT 8764 8763  
CONNECT 8765 8763  
CONNECT 8766 8763  
CONNECT 8754 8756 8755  
CONNECT 8761 8762 8759  
CONNECT 8769 8771 8770 8772 8767  
CONNECT 8772 8776 8774 8773 8769  
CONNECT 8776 8779 8772 8777 8778  
CONNECT 8768 8767  
CONNECT 8770 8769  
CONNECT 8771 8769  
CONNECT 8773 8772  
CONNECT 8775 8774  
CONNECT 8777 8776  
CONNECT 8778 8776  
CONNECT 8779 8776  
CONNECT 8767 8769 8768  
CONNECT 8774 8772 8775  
CONNECT 8782 8785 8784 8780 8783  
CONNECT 8785 8789 8782 8787 8786  
CONNECT 8789 8792 8790 8785 8791  
CONNECT 8781 8780  
CONNECT 8783 8782  
CONNECT 8784 8782  
CONNECT 8786 8785  
CONNECT 8788 8787  
CONNECT 8790 8789  
CONNECT 8791 8789  
CONNECT 8792 8789  
CONNECT 8780 8782 8781  
CONNECT 8787 8785 8788  
CONNECT 8795 8798 8796 8793 8797  
CONNECT 8798 8802 8800 8799 8795  
CONNECT 8802 8804 8803 8798 8805



CONNECT 8794 8793  
CONNECT 8796 8795  
CONNECT 8797 8795  
CONNECT 8799 8798  
CONNECT 8801 8800  
CONNECT 8803 8802  
CONNECT 8804 8802  
CONNECT 8805 8802  
CONNECT 8793 8794 8795  
CONNECT 8800 8801 8798  
CONNECT 8808 8806 8809 8811 8810  
CONNECT 8811 8815 8808 8813 8812  
CONNECT 8815 8817 8818 8811 8816  
CONNECT 8807 8806  
CONNECT 8809 8808  
CONNECT 8810 8808  
CONNECT 8812 8811  
CONNECT 8814 8813  
CONNECT 8816 8815  
CONNECT 8817 8815  
CONNECT 8818 8815  
CONNECT 8806 8807 8808  
CONNECT 8813 8814 8811  
CONNECT 8821 8824 8822 8819 8823  
CONNECT 8824 8825 8821 8828 8826  
CONNECT 8828 8831 8829 8824 8830  
CONNECT 8820 8819  
CONNECT 8822 8821  
CONNECT 8823 8821  
CONNECT 8825 8824  
CONNECT 8827 8826  
CONNECT 8829 8828  
CONNECT 8830 8828  
CONNECT 8831 8828  
CONNECT 8819 8821 8820  
CONNECT 8826 8824 8827  
CONNECT 8834 8836 8832 8835 8837  
CONNECT 8837 8834 8838 8839 8841  
CONNECT 8841 8844 8843 8837 8842  
CONNECT 8833 8832  
CONNECT 8835 8834  
CONNECT 8836 8834  
CONNECT 8838 8837  
CONNECT 8840 8839  
CONNECT 8842 8841  
CONNECT 8843 8841  
CONNECT 8844 8841  
CONNECT 8832 8834 8833  
CONNECT 8839 8840 8837  
CONNECT 8847 8845 8849 8848 8850  
CONNECT 8850 8854 8847 8851 8852  
CONNECT 8854 8857 8856 8850 8855  
CONNECT 8846 8845  
CONNECT 8848 8847  
CONNECT 8849 8847  
CONNECT 8851 8850  
CONNECT 8853 8852

CONNECT 8855 8854  
CONNECT 8856 8854  
CONNECT 8857 8854  
CONNECT 8845 8847 8846  
CONNECT 8852 8853 8850  
CONNECT 8860 8863 8862 8858 8861  
CONNECT 8863 8860 8865 8864 8867  
CONNECT 8867 8863 8869 8870 8868  
CONNECT 8859 8858  
CONNECT 8861 8860  
CONNECT 8862 8860  
CONNECT 8864 8863  
CONNECT 8866 8865  
CONNECT 8868 8867  
CONNECT 8869 8867  
CONNECT 8870 8867  
CONNECT 8858 8860 8859  
CONNECT 8865 8863 8866  
CONNECT 8873 8876 8875 8871 8874  
CONNECT 8876 8880 8878 8873 8877  
CONNECT 8880 8876 8882 8881 8883  
CONNECT 8872 8871  
CONNECT 8874 8873  
CONNECT 8875 8873  
CONNECT 8877 8876  
CONNECT 8879 8878  
CONNECT 8881 8880  
CONNECT 8882 8880  
CONNECT 8883 8880  
CONNECT 8871 8872 8873  
CONNECT 8878 8876 8879  
CONNECT 8886 8888 8889 8887 8884  
CONNECT 8889 8890 8893 8891 8886  
CONNECT 8893 8896 8889 8895 8894  
CONNECT 8885 8884  
CONNECT 8887 8886  
CONNECT 8888 8886  
CONNECT 8890 8889  
CONNECT 8892 8891  
CONNECT 8894 8893  
CONNECT 8895 8893  
CONNECT 8896 8893  
CONNECT 8884 8885 8886  
CONNECT 8891 8889 8892  
CONNECT 8899 8901 8900 8902 8897  
CONNECT 8902 8904 8906 8899 8903  
CONNECT 8906 8909 8908 8902 8907  
CONNECT 8898 8897  
CONNECT 8900 8899  
CONNECT 8901 8899  
CONNECT 8903 8902  
CONNECT 8905 8904  
CONNECT 8907 8906  
CONNECT 8908 8906  
CONNECT 8909 8906  
CONNECT 8897 8898 8899  
CONNECT 8904 8902 8905

CONNECT 8912 8915 8913 8914 8910  
CONNECT 8915 8912 8916 8919 8917  
CONNECT 8919 8922 8915 8921 8920  
CONNECT 8911 8910  
CONNECT 8913 8912  
CONNECT 8914 8912  
CONNECT 8916 8915  
CONNECT 8918 8917  
CONNECT 8920 8919  
CONNECT 8921 8919  
CONNECT 8922 8919  
CONNECT 8910 8912 8911  
CONNECT 8917 8915 8918  
CONNECT 8925 8928 8923 8926 8927  
CONNECT 8928 8930 8925 8929 8932  
CONNECT 8932 8928 8934 8933 8935  
CONNECT 8924 8923  
CONNECT 8926 8925  
CONNECT 8927 8925  
CONNECT 8929 8928  
CONNECT 8931 8930  
CONNECT 8933 8932  
CONNECT 8934 8932  
CONNECT 8935 8932  
CONNECT 8923 8925 8924  
CONNECT 8930 8928 8931  
CONNECT 8938 8939 8941 8940 8936  
CONNECT 8941 8943 8938 8945 8942  
CONNECT 8945 8948 8947 8941 8946  
CONNECT 8937 8936  
CONNECT 8939 8938  
CONNECT 8940 8938  
CONNECT 8942 8941  
CONNECT 8944 8943  
CONNECT 8946 8945  
CONNECT 8947 8945  
CONNECT 8948 8945  
CONNECT 8936 8937 8938  
CONNECT 8943 8941 8944  
CONNECT 8951 8949 8952 8953 8954  
CONNECT 8954 8955 8958 8951 8956  
CONNECT 8958 8961 8959 8960 8954  
CONNECT 8950 8949  
CONNECT 8952 8951  
CONNECT 8953 8951  
CONNECT 8955 8954  
CONNECT 8957 8956  
CONNECT 8959 8958  
CONNECT 8960 8958  
CONNECT 8961 8958  
CONNECT 8949 8950 8951  
CONNECT 8956 8957 8954  
CONNECT 8964 8962 8967 8965 8966  
CONNECT 8967 8968 8969 8971 8964  
CONNECT 8971 8974 8967 8973 8972  
CONNECT 8963 8962  
CONNECT 8965 8964

CONNECT 8966 8964  
CONNECT 8968 8967  
CONNECT 8970 8969  
CONNECT 8972 8971  
CONNECT 8973 8971  
CONNECT 8974 8971  
CONNECT 8962 8963 8964  
CONNECT 8969 8970 8967  
CONNECT 8977 8979 8978 8975 8980  
CONNECT 8980 8977 8984 8982 8981  
CONNECT 8984 8986 8985 8980 8987  
CONNECT 8976 8975  
CONNECT 8978 8977  
CONNECT 8979 8977  
CONNECT 8981 8980  
CONNECT 8983 8982  
CONNECT 8985 8984  
CONNECT 8986 8984  
CONNECT 8987 8984  
CONNECT 8975 8977 8976  
CONNECT 8982 8983 8980  
CONNECT 8990 8993 8991 8992 8988  
CONNECT 8993 8997 8994 8990 8995  
CONNECT 8997 8993 8999 8998 9000  
CONNECT 8989 8988  
CONNECT 8991 8990  
CONNECT 8992 8990  
CONNECT 8994 8993  
CONNECT 8996 8995  
CONNECT 8998 8997  
CONNECT 8999 8997  
CONNECT 9000 8997  
CONNECT 8988 8990 8989  
CONNECT 8995 8993 8996  
CONNECT 9003 9004 9006 9001 9005  
CONNECT 9006 9007 9008 9003 9010  
CONNECT 9010 9012 9006 9011 9013  
CONNECT 9002 9001  
CONNECT 9004 9003  
CONNECT 9005 9003  
CONNECT 9007 9006  
CONNECT 9009 9008  
CONNECT 9011 9010  
CONNECT 9012 9010  
CONNECT 9013 9010  
CONNECT 9001 9002 9003  
CONNECT 9008 9009 9006  
CONNECT 9016 9019 9014 9018 9017  
CONNECT 9019 9020 9023 9016 9021  
CONNECT 9023 9024 9019 9025 9026  
CONNECT 9015 9014  
CONNECT 9017 9016  
CONNECT 9018 9016  
CONNECT 9020 9019  
CONNECT 9022 9021  
CONNECT 9024 9023  
CONNECT 9025 9023

CONNECT 9026 9023  
CONNECT 9014 9015 9016  
CONNECT 9021 9019 9022  
CONNECT 9029 9030 9032 9027 9031  
CONNECT 9032 9034 9033 9029 9036  
CONNECT 9036 9037 9032 9039 9038  
CONNECT 9028 9027  
CONNECT 9030 9029  
CONNECT 9031 9029  
CONNECT 9033 9032  
CONNECT 9035 9034  
CONNECT 9037 9036  
CONNECT 9038 9036  
CONNECT 9039 9036  
CONNECT 9027 9029 9028  
CONNECT 9034 9032 9035  
CONNECT 9042 9040 9043 9044 9045  
CONNECT 9045 9046 9049 9047 9042  
CONNECT 9049 9052 9051 9050 9045  
CONNECT 9041 9040  
CONNECT 9043 9042  
CONNECT 9044 9042  
CONNECT 9046 9045  
CONNECT 9048 9047  
CONNECT 9050 9049  
CONNECT 9051 9049  
CONNECT 9052 9049  
CONNECT 9040 9041 9042  
CONNECT 9047 9048 9045  
CONNECT 9055 9058 9056 9057 9053  
CONNECT 9058 9060 9062 9059 9055  
CONNECT 9062 9058 9064 9063 9065  
CONNECT 9054 9053  
CONNECT 9056 9055  
CONNECT 9057 9055  
CONNECT 9059 9058  
CONNECT 9061 9060  
CONNECT 9063 9062  
CONNECT 9064 9062  
CONNECT 9065 9062  
CONNECT 9053 9054 9055  
CONNECT 9060 9058 9061  
CONNECT 9068 9069 9070 9066 9071  
CONNECT 9071 9072 9068 9073 9075  
CONNECT 9075 9078 9077 9071 9076  
CONNECT 9067 9066  
CONNECT 9069 9068  
CONNECT 9070 9068  
CONNECT 9072 9071  
CONNECT 9074 9073  
CONNECT 9076 9075  
CONNECT 9077 9075  
CONNECT 9078 9075  
CONNECT 9066 9068 9067  
CONNECT 9073 9074 9071  
CONNECT 9081 9082 9079 9084 9083  
CONNECT 9084 9088 9085 9081 9086

CONECT 9088 9089 9084 9091 9090  
CONECT 9080 9079  
CONECT 9082 9081  
CONECT 9083 9081  
CONECT 9085 9084  
CONECT 9087 9086  
CONECT 9089 9088  
CONECT 9090 9088  
CONECT 9091 9088  
CONECT 9079 9080 9081  
CONECT 9086 9084 9087  
CONECT 9094 9095 9096 9092 9097  
CONECT 9097 9101 9098 9094 9099  
CONECT 9101 9103 9104 9097 9102  
CONECT 9093 9092  
CONECT 9095 9094  
CONECT 9096 9094  
CONECT 9098 9097  
CONECT 9100 9099  
CONECT 9102 9101  
CONECT 9103 9101  
CONECT 9104 9101  
CONECT 9092 9093 9094  
CONECT 9099 9100 9097  
CONECT 9107 9110 9105 9108 9109  
CONECT 9110 9107 9111 9112 9114  
CONECT 9114 9115 9110 9117 9116  
CONECT 9106 9105  
CONECT 9108 9107  
CONECT 9109 9107  
CONECT 9111 9110  
CONECT 9113 9112  
CONECT 9115 9114  
CONECT 9116 9114  
CONECT 9117 9114  
CONECT 9105 9107 9106  
CONECT 9112 9113 9110  
CONECT 9120 9121 9118 9123 9122  
CONECT 9123 9127 9124 9125 9120  
CONECT 9127 9123 9128 9130 9129  
CONECT 9119 9118  
CONECT 9121 9120  
CONECT 9122 9120  
CONECT 9124 9123  
CONECT 9126 9125  
CONECT 9128 9127  
CONECT 9129 9127  
CONECT 9130 9127  
CONECT 9118 9119 9120  
CONECT 9125 9123 9126  
CONECT 9133 9134 9135 9136 9131  
CONECT 9136 9133 9137 9138 9140  
CONECT 9140 9142 9136 9143 9141  
CONECT 9132 9131  
CONECT 9134 9133  
CONECT 9135 9133  
CONECT 9137 9136

CONNECT 9139 9138  
CONNECT 9141 9140  
CONNECT 9142 9140  
CONNECT 9143 9140  
CONNECT 9131 9132 9133  
CONNECT 9138 9139 9136  
CONNECT 9146 9148 9149 9144 9147  
CONNECT 9149 9150 9151 9153 9146  
CONNECT 9153 9149 9156 9155 9154  
CONNECT 9145 9144  
CONNECT 9147 9146  
CONNECT 9148 9146  
CONNECT 9150 9149  
CONNECT 9152 9151  
CONNECT 9154 9153  
CONNECT 9155 9153  
CONNECT 9156 9153  
CONNECT 9144 9145 9146  
CONNECT 9151 9149 9152  
CONNECT 9159 9161 9162 9160 9157  
CONNECT 9162 9166 9163 9164 9159  
CONNECT 9166 9167 9162 9169 9168  
CONNECT 9158 9157  
CONNECT 9160 9159  
CONNECT 9161 9159  
CONNECT 9163 9162  
CONNECT 9165 9164  
CONNECT 9167 9166  
CONNECT 9168 9166  
CONNECT 9169 9166  
CONNECT 9157 9158 9159  
CONNECT 9164 9162 9165  
CONNECT 9172 9170 9173 9175 9174  
CONNECT 9175 9176 9172 9179 9177  
CONNECT 9179 9182 9180 9181 9175  
CONNECT 9171 9170  
CONNECT 9173 9172  
CONNECT 9174 9172  
CONNECT 9176 9175  
CONNECT 9178 9177  
CONNECT 9180 9179  
CONNECT 9181 9179  
CONNECT 9182 9179  
CONNECT 9170 9172 9171  
CONNECT 9177 9178 9175  
CONNECT 9185 9183 9186 9187 9188  
CONNECT 9188 9190 9185 9192 9189  
CONNECT 9192 9193 9195 9188 9194  
CONNECT 9184 9183  
CONNECT 9186 9185  
CONNECT 9187 9185  
CONNECT 9189 9188  
CONNECT 9191 9190  
CONNECT 9193 9192  
CONNECT 9194 9192  
CONNECT 9195 9192  
CONNECT 9183 9185 9184

CONNECT 9190 9191 9188  
CONNECT 9198 9200 9201 9196 9199  
CONNECT 9201 9198 9203 9202 9205  
CONNECT 9205 9208 9206 9201 9207  
CONNECT 9197 9196  
CONNECT 9199 9198  
CONNECT 9200 9198  
CONNECT 9202 9201  
CONNECT 9204 9203  
CONNECT 9206 9205  
CONNECT 9207 9205  
CONNECT 9208 9205  
CONNECT 9196 9198 9197  
CONNECT 9203 9201 9204  
CONNECT 9211 9212 9213 9214 9209  
CONNECT 9214 9215 9216 9211 9218  
CONNECT 9218 9220 9214 9221 9219  
CONNECT 9210 9209  
CONNECT 9212 9211  
CONNECT 9213 9211  
CONNECT 9215 9214  
CONNECT 9217 9216  
CONNECT 9219 9218  
CONNECT 9220 9218  
CONNECT 9221 9218  
CONNECT 9209 9210 9211  
CONNECT 9216 9217 9214  
CONNECT 9224 9225 9227 9226 9222  
CONNECT 9227 9229 9224 9231 9228  
CONNECT 9231 9227 9233 9232 9234  
CONNECT 9223 9222  
CONNECT 9225 9224  
CONNECT 9226 9224  
CONNECT 9228 9227  
CONNECT 9230 9229  
CONNECT 9232 9231  
CONNECT 9233 9231  
CONNECT 9234 9231  
CONNECT 9222 9223 9224  
CONNECT 9229 9227 9230  
CONNECT 9237 9235 9239 9240 9238  
CONNECT 9240 9242 9241 9237 9244  
CONNECT 9244 9245 9246 9247 9240  
CONNECT 9236 9235  
CONNECT 9238 9237  
CONNECT 9239 9237  
CONNECT 9241 9240  
CONNECT 9243 9242  
CONNECT 9245 9244  
CONNECT 9246 9244  
CONNECT 9247 9244  
CONNECT 9235 9236 9237  
CONNECT 9242 9243 9240  
CONNECT 9250 9253 9248 9252 9251  
CONNECT 9253 9250 9257 9254 9255  
CONNECT 9257 9260 9253 9258 9259  
CONNECT 9249 9248



CONNECT 9251 9250  
CONNECT 9252 9250  
CONNECT 9254 9253  
CONNECT 9256 9255  
CONNECT 9258 9257  
CONNECT 9259 9257  
CONNECT 9260 9257  
CONNECT 9248 9250 9249  
CONNECT 9255 9253 9256  
CONNECT 9263 9261 9265 9264 9266  
CONNECT 9266 9268 9263 9270 9267  
CONNECT 9270 9272 9266 9271 9273  
CONNECT 9262 9261  
CONNECT 9264 9263  
CONNECT 9265 9263  
CONNECT 9267 9266  
CONNECT 9269 9268  
CONNECT 9271 9270  
CONNECT 9272 9270  
CONNECT 9273 9270  
CONNECT 9261 9262 9263  
CONNECT 9268 9269 9266  
CONNECT 9276 9274 9279 9277 9278  
CONNECT 9279 9280 9281 9276 9283  
CONNECT 9283 9284 9279 9286 9285  
CONNECT 9275 9274  
CONNECT 9277 9276  
CONNECT 9278 9276  
CONNECT 9280 9279  
CONNECT 9282 9281  
CONNECT 9284 9283  
CONNECT 9285 9283  
CONNECT 9286 9283  
CONNECT 9274 9276 9275  
CONNECT 9281 9279 9282  
CONNECT 9289 9292 9291 9290 9287  
CONNECT 9292 9294 9289 9293 9296  
CONNECT 9296 9297 9298 9292 9299  
CONNECT 9288 9287  
CONNECT 9290 9289  
CONNECT 9291 9289  
CONNECT 9293 9292  
CONNECT 9295 9294  
CONNECT 9297 9296  
CONNECT 9298 9296  
CONNECT 9299 9296  
CONNECT 9287 9289 9288  
CONNECT 9294 9295 9292  
CONNECT 9302 9304 9300 9305 9303  
CONNECT 9305 9306 9307 9309 9302  
CONNECT 9309 9310 9305 9312 9311  
CONNECT 9301 9300  
CONNECT 9303 9302  
CONNECT 9304 9302  
CONNECT 9306 9305  
CONNECT 9308 9307  
CONNECT 9310 9309

CONNECT 9311 9309  
CONNECT 9312 9309  
CONNECT 9300 9301 9302  
CONNECT 9307 9305 9308  
CONNECT 9315 9313 9317 9318 9316  
CONNECT 9318 9319 9315 9320 9322  
CONNECT 9322 9324 9318 9325 9323  
CONNECT 9314 9313  
CONNECT 9316 9315  
CONNECT 9317 9315  
CONNECT 9319 9318  
CONNECT 9321 9320  
CONNECT 9323 9322  
CONNECT 9324 9322  
CONNECT 9325 9322  
CONNECT 9313 9315 9314  
CONNECT 9320 9321 9318  
CONNECT 9328 9331 9326 9329 9330  
CONNECT 9331 9332 9335 9328 9333  
CONNECT 9335 9338 9331 9336 9337  
CONNECT 9327 9326  
CONNECT 9329 9328  
CONNECT 9330 9328  
CONNECT 9332 9331  
CONNECT 9334 9333  
CONNECT 9336 9335  
CONNECT 9337 9335  
CONNECT 9338 9335  
CONNECT 9326 9328 9327  
CONNECT 9333 9331 9334  
CONNECT 9341 9342 9339 9344 9343  
CONNECT 9344 9345 9348 9341 9346  
CONNECT 9348 9344 9349 9351 9350  
CONNECT 9340 9339  
CONNECT 9342 9341  
CONNECT 9343 9341  
CONNECT 9345 9344  
CONNECT 9347 9346  
CONNECT 9349 9348  
CONNECT 9350 9348  
CONNECT 9351 9348  
CONNECT 9339 9341 9340  
CONNECT 9346 9344 9347  
CONNECT 9354 9352 9357 9355 9356  
CONNECT 9357 9361 9354 9359 9358  
CONNECT 9361 9357 9363 9362 9364  
CONNECT 9353 9352  
CONNECT 9355 9354  
CONNECT 9356 9354  
CONNECT 9358 9357  
CONNECT 9360 9359  
CONNECT 9362 9361  
CONNECT 9363 9361  
CONNECT 9364 9361  
CONNECT 9352 9353 9354  
CONNECT 9359 9357 9360  
CONNECT 9367 9369 9368 9370 9365

CONNECT 9370 9367 9372 9374 9371  
CONNECT 9374 9376 9377 9375 9370  
CONNECT 9366 9365  
CONNECT 9368 9367  
CONNECT 9369 9367  
CONNECT 9371 9370  
CONNECT 9373 9372  
CONNECT 9375 9374  
CONNECT 9376 9374  
CONNECT 9377 9374  
CONNECT 9365 9367 9366  
CONNECT 9372 9373 9370  
CONNECT 9380 9381 9382 9378 9383  
CONNECT 9383 9387 9385 9380 9384  
CONNECT 9387 9390 9389 9388 9383  
CONNECT 9379 9378  
CONNECT 9381 9380  
CONNECT 9382 9380  
CONNECT 9384 9383  
CONNECT 9386 9385  
CONNECT 9388 9387  
CONNECT 9389 9387  
CONNECT 9390 9387  
CONNECT 9378 9379 9380  
CONNECT 9385 9386 9383  
CONNECT 9393 9396 9395 9394 9391  
CONNECT 9396 9400 9398 9393 9397  
CONNECT 9400 9396 9402 9403 9401  
CONNECT 9392 9391  
CONNECT 9394 9393  
CONNECT 9395 9393  
CONNECT 9397 9396  
CONNECT 9399 9398  
CONNECT 9401 9400  
CONNECT 9402 9400  
CONNECT 9403 9400  
CONNECT 9391 9392 9393  
CONNECT 9398 9396 9399  
CONNECT 9406 9407 9408 9404 9409  
CONNECT 9409 9406 9413 9410 9411  
CONNECT 9413 9414 9416 9415 9409  
CONNECT 9405 9404  
CONNECT 9407 9406  
CONNECT 9408 9406  
CONNECT 9410 9409  
CONNECT 9412 9411  
CONNECT 9414 9413  
CONNECT 9415 9413  
CONNECT 9416 9413  
CONNECT 9404 9406 9405  
CONNECT 9411 9412 9409  
CONNECT 9419 9417 9422 9421 9420  
CONNECT 9422 9423 9419 9426 9424  
CONNECT 9426 9428 9422 9427 9429  
CONNECT 9418 9417  
CONNECT 9420 9419  
CONNECT 9421 9419

CONNECT 9423 9422  
CONNECT 9425 9424  
CONNECT 9427 9426  
CONNECT 9428 9426  
CONNECT 9429 9426  
CONNECT 9417 9419 9418  
CONNECT 9424 9425 9422  
CONNECT 9432 9430 9435 9434 9433  
CONNECT 9435 9432 9437 9436 9439  
CONNECT 9439 9442 9440 9441 9435  
CONNECT 9431 9430  
CONNECT 9433 9432  
CONNECT 9434 9432  
CONNECT 9436 9435  
CONNECT 9438 9437  
CONNECT 9440 9439  
CONNECT 9441 9439  
CONNECT 9442 9439  
CONNECT 9430 9432 9431  
CONNECT 9437 9435 9438  
CONNECT 9445 9447 9443 9448 9446  
CONNECT 9448 9445 9450 9449 9452  
CONNECT 9452 9455 9453 9454 9448  
CONNECT 9444 9443  
CONNECT 9446 9445  
CONNECT 9447 9445  
CONNECT 9449 9448  
CONNECT 9451 9450  
CONNECT 9453 9452  
CONNECT 9454 9452  
CONNECT 9455 9452  
CONNECT 9443 9445 9444  
CONNECT 9450 9451 9448  
CONNECT 9458 9460 9461 9459 9456  
CONNECT 9461 9465 9458 9463 9462  
CONNECT 9465 9466 9461 9468 9467  
CONNECT 9457 9456  
CONNECT 9459 9458  
CONNECT 9460 9458  
CONNECT 9462 9461  
CONNECT 9464 9463  
CONNECT 9466 9465  
CONNECT 9467 9465  
CONNECT 9468 9465  
CONNECT 9456 9458 9457  
CONNECT 9463 9464 9461  
CONNECT 9471 9474 9469 9473 9472  
CONNECT 9474 9471 9476 9475 9478  
CONNECT 9478 9474 9481 9480 9479  
CONNECT 9470 9469  
CONNECT 9472 9471  
CONNECT 9473 9471  
CONNECT 9475 9474  
CONNECT 9477 9476  
CONNECT 9479 9478  
CONNECT 9480 9478  
CONNECT 9481 9478

CONNECT 9469 9471 9470  
CONNECT 9476 9474 9477  
CONNECT 9484 9485 9487 9482 9486  
CONNECT 9487 9484 9489 9488 9491  
CONNECT 9491 9494 9493 9487 9492  
CONNECT 9483 9482  
CONNECT 9485 9484  
CONNECT 9486 9484  
CONNECT 9488 9487  
CONNECT 9490 9489  
CONNECT 9492 9491  
CONNECT 9493 9491  
CONNECT 9494 9491  
CONNECT 9482 9484 9483  
CONNECT 9489 9490 9487  
CONNECT 9497 9499 9500 9495 9498  
CONNECT 9500 9497 9502 9501 9504  
CONNECT 9504 9500 9506 9507 9505  
CONNECT 9496 9495  
CONNECT 9498 9497  
CONNECT 9499 9497  
CONNECT 9501 9500  
CONNECT 9503 9502  
CONNECT 9505 9504  
CONNECT 9506 9504  
CONNECT 9507 9504  
CONNECT 9495 9497 9496  
CONNECT 9502 9503 9500  
CONNECT 9510 9511 9508 9513 9512  
CONNECT 9513 9517 9510 9514 9515  
CONNECT 9517 9520 9513 9519 9518  
CONNECT 9509 9508  
CONNECT 9511 9510  
CONNECT 9512 9510  
CONNECT 9514 9513  
CONNECT 9516 9515  
CONNECT 9518 9517  
CONNECT 9519 9517  
CONNECT 9520 9517  
CONNECT 9508 9510 9509  
CONNECT 9515 9513 9516  
CONNECT 9523 9524 9521 9526 9525  
CONNECT 9526 9523 9528 9530 9527  
CONNECT 9530 9532 9533 9531 9526  
CONNECT 9522 9521  
CONNECT 9524 9523  
CONNECT 9525 9523  
CONNECT 9527 9526  
CONNECT 9529 9528  
CONNECT 9531 9530  
CONNECT 9532 9530  
CONNECT 9533 9530  
CONNECT 9521 9523 9522  
CONNECT 9528 9529 9526  
CONNECT 9536 9539 9538 9537 9534  
CONNECT 9539 9536 9540 9543 9541  
CONNECT 9543 9539 9544 9546 9545

CONNECT 9535 9534  
CONNECT 9537 9536  
CONNECT 9538 9536  
CONNECT 9540 9539  
CONNECT 9542 9541  
CONNECT 9544 9543  
CONNECT 9545 9543  
CONNECT 9546 9543  
CONNECT 9534 9536 9535  
CONNECT 9541 9539 9542  
CONNECT 9549 9547 9551 9552 9550  
CONNECT 9552 9556 9549 9554 9553  
CONNECT 9556 9552 9559 9558 9557  
CONNECT 9548 9547  
CONNECT 9550 9549  
CONNECT 9551 9549  
CONNECT 9553 9552  
CONNECT 9555 9554  
CONNECT 9557 9556  
CONNECT 9558 9556  
CONNECT 9559 9556  
CONNECT 9547 9548 9549  
CONNECT 9554 9552 9555  
CONNECT 9562 9565 9564 9563 9560  
CONNECT 9565 9562 9569 9566 9567  
CONNECT 9569 9571 9565 9572 9570  
CONNECT 9561 9560  
CONNECT 9563 9562  
CONNECT 9564 9562  
CONNECT 9566 9565  
CONNECT 9568 9567  
CONNECT 9570 9569  
CONNECT 9571 9569  
CONNECT 9572 9569  
CONNECT 9560 9561 9562  
CONNECT 9567 9568 9565  
CONNECT 9575 9577 9576 9578 9573  
CONNECT 9578 9575 9582 9579 9580  
CONNECT 9582 9584 9585 9578 9583  
CONNECT 9574 9573  
CONNECT 9576 9575  
CONNECT 9577 9575  
CONNECT 9579 9578  
CONNECT 9581 9580  
CONNECT 9583 9582  
CONNECT 9584 9582  
CONNECT 9585 9582  
CONNECT 9573 9575 9574  
CONNECT 9580 9578 9581  
CONNECT 9588 9591 9589 9586 9590  
CONNECT 9591 9588 9595 9592 9593  
CONNECT 9595 9591 9597 9596 9598  
CONNECT 9587 9586  
CONNECT 9589 9588  
CONNECT 9590 9588  
CONNECT 9592 9591  
CONNECT 9594 9593

CONNECT 9596 9595  
CONNECT 9597 9595  
CONNECT 9598 9595  
CONNECT 9586 9588 9587  
CONNECT 9593 9591 9594  
CONNECT 9601 9604 9603 9599 9602  
CONNECT 9604 9608 9601 9606 9605  
CONNECT 9608 9609 9604 9611 9610  
CONNECT 9600 9599  
CONNECT 9602 9601  
CONNECT 9603 9601  
CONNECT 9605 9604  
CONNECT 9607 9606  
CONNECT 9609 9608  
CONNECT 9610 9608  
CONNECT 9611 9608  
CONNECT 9599 9601 9600  
CONNECT 9606 9604 9607  
CONNECT 9614 9615 9617 9616 9612  
CONNECT 9617 9614 9618 9619 9621  
CONNECT 9621 9624 9622 9623 9617  
CONNECT 9613 9612  
CONNECT 9615 9614  
CONNECT 9616 9614  
CONNECT 9618 9617  
CONNECT 9620 9619  
CONNECT 9622 9621  
CONNECT 9623 9621  
CONNECT 9624 9621  
CONNECT 9612 9614 9613  
CONNECT 9619 9620 9617  
CONNECT 9627 9630 9625 9629 9628  
CONNECT 9630 9634 9632 9631 9627  
CONNECT 9634 9630 9636 9637 9635  
CONNECT 9626 9625  
CONNECT 9628 9627  
CONNECT 9629 9627  
CONNECT 9631 9630  
CONNECT 9633 9632  
CONNECT 9635 9634  
CONNECT 9636 9634  
CONNECT 9637 9634  
CONNECT 9625 9626 9627  
CONNECT 9632 9630 9633  
CONNECT 9640 9643 9638 9642 9641  
CONNECT 9643 9644 9647 9640 9645  
CONNECT 9647 9643 9650 9649 9648  
CONNECT 9639 9638  
CONNECT 9641 9640  
CONNECT 9642 9640  
CONNECT 9644 9643  
CONNECT 9646 9645  
CONNECT 9648 9647  
CONNECT 9649 9647  
CONNECT 9650 9647  
CONNECT 9638 9640 9639  
CONNECT 9645 9643 9646

CONNECT 9653 9656 9654 9651 9655  
CONNECT 9656 9653 9658 9660 9657  
CONNECT 9660 9656 9661 9662 9663  
CONNECT 9652 9651  
CONNECT 9654 9653  
CONNECT 9655 9653  
CONNECT 9657 9656  
CONNECT 9659 9658  
CONNECT 9661 9660  
CONNECT 9662 9660  
CONNECT 9663 9660  
CONNECT 9651 9653 9652  
CONNECT 9658 9656 9659  
CONNECT 9666 9667 9669 9664 9668  
CONNECT 9669 9673 9670 9666 9671  
CONNECT 9673 9669 9674 9676 9675  
CONNECT 9665 9664  
CONNECT 9667 9666  
CONNECT 9668 9666  
CONNECT 9670 9669  
CONNECT 9672 9671  
CONNECT 9674 9673  
CONNECT 9675 9673  
CONNECT 9676 9673  
CONNECT 9664 9665 9666  
CONNECT 9671 9669 9672  
CONNECT 9679 9680 9682 9677 9681  
CONNECT 9682 9683 9684 9686 9679  
CONNECT 9686 9682 9687 9688 9689  
CONNECT 9678 9677  
CONNECT 9680 9679  
CONNECT 9681 9679  
CONNECT 9683 9682  
CONNECT 9685 9684  
CONNECT 9687 9686  
CONNECT 9688 9686  
CONNECT 9689 9686  
CONNECT 9677 9678 9679  
CONNECT 9684 9682 9685  
CONNECT 9692 9693 9690 9695 9694  
CONNECT 9695 9696 9699 9697 9692  
CONNECT 9699 9695 9700 9701 9702  
CONNECT 9691 9690  
CONNECT 9693 9692  
CONNECT 9694 9692  
CONNECT 9696 9695  
CONNECT 9698 9697  
CONNECT 9700 9699  
CONNECT 9701 9699  
CONNECT 9702 9699  
CONNECT 9690 9692 9691  
CONNECT 9697 9695 9698  
CONNECT 9705 9703 9707 9706 9708  
CONNECT 9708 9709 9705 9710 9712  
CONNECT 9712 9714 9708 9713 9715  
CONNECT 9704 9703  
CONNECT 9706 9705



CONNECT 9707 9705  
CONNECT 9709 9708  
CONNECT 9711 9710  
CONNECT 9713 9712  
CONNECT 9714 9712  
CONNECT 9715 9712  
CONNECT 9703 9705 9704  
CONNECT 9710 9711 9708  
CONNECT 9718 9721 9716 9719 9720  
CONNECT 9721 9725 9718 9722 9723  
CONNECT 9725 9728 9721 9727 9726  
CONNECT 9717 9716  
CONNECT 9719 9718  
CONNECT 9720 9718  
CONNECT 9722 9721  
CONNECT 9724 9723  
CONNECT 9726 9725  
CONNECT 9727 9725  
CONNECT 9728 9725  
CONNECT 9716 9718 9717  
CONNECT 9723 9721 9724  
CONNECT 9731 9729 9733 9732 9734  
CONNECT 9734 9735 9731 9736 9738  
CONNECT 9738 9740 9739 9734 9741  
CONNECT 9730 9729  
CONNECT 9732 9731  
CONNECT 9733 9731  
CONNECT 9735 9734  
CONNECT 9737 9736  
CONNECT 9739 9738  
CONNECT 9740 9738  
CONNECT 9741 9738  
CONNECT 9729 9731 9730  
CONNECT 9736 9734 9737  
CONNECT 9744 9742 9745 9747 9746  
CONNECT 9747 9751 9748 9749 9744  
CONNECT 9751 9747 9752 9753 9754  
CONNECT 9743 9742  
CONNECT 9745 9744  
CONNECT 9746 9744  
CONNECT 9748 9747  
CONNECT 9750 9749  
CONNECT 9752 9751  
CONNECT 9753 9751  
CONNECT 9754 9751  
CONNECT 9742 9743 9744  
CONNECT 9749 9747 9750  
CONNECT 9757 9758 9755 9759 9760  
CONNECT 9760 9764 9761 9757 9762  
CONNECT 9764 9765 9767 9766 9760  
CONNECT 9756 9755  
CONNECT 9758 9757  
CONNECT 9759 9757  
CONNECT 9761 9760  
CONNECT 9763 9762  
CONNECT 9765 9764  
CONNECT 9766 9764

CONNECT 9767 9764  
CONNECT 9755 9756 9757  
CONNECT 9762 9763 9760  
CONNECT 9770 9768 9772 9773 9771  
CONNECT 9773 9775 9770 9774 9777  
CONNECT 9777 9780 9773 9778 9779  
CONNECT 9769 9768  
CONNECT 9771 9770  
CONNECT 9772 9770  
CONNECT 9774 9773  
CONNECT 9776 9775  
CONNECT 9778 9777  
CONNECT 9779 9777  
CONNECT 9780 9777  
CONNECT 9768 9770 9769  
CONNECT 9775 9776 9773  
CONNECT 9783 9785 9781 9784 9786  
CONNECT 9786 9783 9787 9788 9790  
CONNECT 9790 9792 9791 9793 9786  
CONNECT 9782 9781  
CONNECT 9784 9783  
CONNECT 9785 9783  
CONNECT 9787 9786  
CONNECT 9789 9788  
CONNECT 9791 9790  
CONNECT 9792 9790  
CONNECT 9793 9790  
CONNECT 9781 9783 9782  
CONNECT 9788 9789 9786  
CONNECT 9796 9799 9797 9794 9798  
CONNECT 9799 9800 9803 9801 9796  
CONNECT 9803 9806 9799 9804 9805  
CONNECT 9795 9794  
CONNECT 9797 9796  
CONNECT 9798 9796  
CONNECT 9800 9799  
CONNECT 9802 9801  
CONNECT 9804 9803  
CONNECT 9805 9803  
CONNECT 9806 9803  
CONNECT 9794 9795 9796  
CONNECT 9801 9799 9802  
CONNECT 9809 9812 9811 9810 9807  
CONNECT 9812 9809 9816 9814 9813  
CONNECT 9816 9812 9819 9817 9818  
CONNECT 9808 9807  
CONNECT 9810 9809  
CONNECT 9811 9809  
CONNECT 9813 9812  
CONNECT 9815 9814  
CONNECT 9817 9816  
CONNECT 9818 9816  
CONNECT 9819 9816  
CONNECT 9807 9808 9809  
CONNECT 9814 9815 9812  
CONNECT 9822 9820 9825 9823 9824  
CONNECT 9825 9827 9822 9829 9826

CONECT 9829 9832 9830 9825 9831  
CONECT 9821 9820  
CONECT 9823 9822  
CONECT 9824 9822  
CONECT 9826 9825  
CONECT 9828 9827  
CONECT 9830 9829  
CONECT 9831 9829  
CONECT 9832 9829  
CONECT 9820 9822 9821  
CONECT 9827 9825 9828  
CONECT 9835 9836 9833 9837 9838  
CONECT 9838 9842 9839 9840 9835  
CONECT 9842 9844 9843 9845 9838  
CONECT 9834 9833  
CONECT 9836 9835  
CONECT 9837 9835  
CONECT 9839 9838  
CONECT 9841 9840  
CONECT 9843 9842  
CONECT 9844 9842  
CONECT 9845 9842  
CONECT 9833 9834 9835  
CONECT 9840 9838 9841  
CONECT 9848 9850 9849 9846 9851  
CONECT 9851 9852 9848 9853 9855  
CONECT 9855 9858 9856 9851 9857  
CONECT 9847 9846  
CONECT 9849 9848  
CONECT 9850 9848  
CONECT 9852 9851  
CONECT 9854 9853  
CONECT 9856 9855  
CONECT 9857 9855  
CONECT 9858 9855  
CONECT 9846 9848 9847  
CONECT 9853 9854 9851  
CONECT 9861 9862 9859 9863 9864  
CONECT 9864 9861 9866 9868 9865  
CONECT 9868 9869 9864 9870 9871  
CONECT 9860 9859  
CONECT 9862 9861  
CONECT 9863 9861  
CONECT 9865 9864  
CONECT 9867 9866  
CONECT 9869 9868  
CONECT 9870 9868  
CONECT 9871 9868  
CONECT 9859 9861 9860  
CONECT 9866 9864 9867  
CONECT 9874 9875 9877 9876 9872  
CONECT 9877 9879 9881 9878 9874  
CONECT 9881 9877 9882 9884 9883  
CONECT 9873 9872  
CONECT 9875 9874  
CONECT 9876 9874  
CONECT 9878 9877

CONNECT 9880 9879  
CONNECT 9882 9881  
CONNECT 9883 9881  
CONNECT 9884 9881  
CONNECT 9872 9873 9874  
CONNECT 9879 9877 9880  
CONNECT 9887 9888 9889 9885 9890  
CONNECT 9890 9891 9892 9887 9894  
CONNECT 9894 9895 9896 9890 9897  
CONNECT 9886 9885  
CONNECT 9888 9887  
CONNECT 9889 9887  
CONNECT 9891 9890  
CONNECT 9893 9892  
CONNECT 9895 9894  
CONNECT 9896 9894  
CONNECT 9897 9894  
CONNECT 9885 9887 9886  
CONNECT 9892 9893 9890  
CONNECT 9900 9903 9898 9902 9901  
CONNECT 9903 9905 9900 9907 9904  
CONNECT 9907 9903 9908 9909 9910  
CONNECT 9899 9898  
CONNECT 9901 9900  
CONNECT 9902 9900  
CONNECT 9904 9903  
CONNECT 9906 9905  
CONNECT 9908 9907  
CONNECT 9909 9907  
CONNECT 9910 9907  
CONNECT 9898 9899 9900  
CONNECT 9905 9903 9906  
CONNECT 9913 9911 9914 9915 9916  
CONNECT 9916 9917 9918 9920 9913  
CONNECT 9920 9921 9922 9916 9923  
CONNECT 9912 9911  
CONNECT 9914 9913  
CONNECT 9915 9913  
CONNECT 9917 9916  
CONNECT 9919 9918  
CONNECT 9921 9920  
CONNECT 9922 9920  
CONNECT 9923 9920  
CONNECT 9911 9912 9913  
CONNECT 9918 9916 9919  
CONNECT 9926 9927 9924 9928 9929  
CONNECT 9929 9930 9931 9926 9933  
CONNECT 9933 9934 9936 9929 9935  
CONNECT 9925 9924  
CONNECT 9927 9926  
CONNECT 9928 9926  
CONNECT 9930 9929  
CONNECT 9932 9931  
CONNECT 9934 9933  
CONNECT 9935 9933  
CONNECT 9936 9933  
CONNECT 9924 9926 9925

CONNECT 9931 9932 9929  
CONNECT 9939 9937 9940 9941 9942  
CONNECT 9942 9946 9944 9943 9939  
CONNECT 9946 9947 9949 9942 9948  
CONNECT 9938 9937  
CONNECT 9940 9939  
CONNECT 9941 9939  
CONNECT 9943 9942  
CONNECT 9945 9944  
CONNECT 9947 9946  
CONNECT 9948 9946  
CONNECT 9949 9946  
CONNECT 9937 9938 9939  
CONNECT 9944 9942 9945  
CONNECT 9952 9954 9955 9950 9953  
CONNECT 9955 9959 9952 9956 9957  
CONNECT 9959 9955 9960 9962 9961  
CONNECT 9951 9950  
CONNECT 9953 9952  
CONNECT 9954 9952  
CONNECT 9956 9955  
CONNECT 9958 9957  
CONNECT 9960 9959  
CONNECT 9961 9959  
CONNECT 9962 9959  
CONNECT 9950 9952 9951  
CONNECT 9957 9955 9958  
CONNECT 9965 9963 9967 9966 9968  
CONNECT 9968 9970 9969 9972 9965  
CONNECT 9972 9975 9974 9973 9968  
CONNECT 9964 9963  
CONNECT 9966 9965  
CONNECT 9967 9965  
CONNECT 9969 9968  
CONNECT 9971 9970  
CONNECT 9973 9972  
CONNECT 9974 9972  
CONNECT 9975 9972  
CONNECT 9963 9964 9965  
CONNECT 9970 9971 9968  
CONNECT 9978 9981 9976 9980 9979  
CONNECT 9981 9978 9982 9985 9983  
CONNECT 9985 9988 9981 9986 9987  
CONNECT 9977 9976  
CONNECT 9979 9978  
CONNECT 9980 9978  
CONNECT 9982 9981  
CONNECT 9984 9983  
CONNECT 9986 9985  
CONNECT 9987 9985  
CONNECT 9988 9985  
CONNECT 9976 9978 9977  
CONNECT 9983 9984 9981  
CONNECT 9991 9992 9994 9993 9989  
CONNECT 9994 9991 9996 9998 9995  
CONNECT 99981000110000 9994 9999  
CONNECT 9990 9989

CONNECT 9992 9991  
CONNECT 9993 9991  
CONNECT 9995 9994  
CONNECT 9997 9996  
CONNECT 9999 9998  
CONNECT10000 9998  
CONNECT10001 9998  
CONNECT 9989 9991 9990  
CONNECT 9996 9994 9997  
CONNECT1000410007100021000610005  
CONNECT1000710004100091001110008  
CONNECT1001110014100071001310012  
CONNECT1000310002  
CONNECT1000510004  
CONNECT1000610004  
CONNECT1000810007  
CONNECT1001010009  
CONNECT1001210011  
CONNECT1001310011  
CONNECT1001410011  
CONNECT100021000410003  
CONNECT100091000710010  
CONNECT1001710018100201001910015  
CONNECT1002010017100241002210021  
CONNECT1002410025100201002610027  
CONNECT1001610015  
CONNECT1001810017  
CONNECT1001910017  
CONNECT1002110020  
CONNECT1002310022  
CONNECT1002510024  
CONNECT1002610024  
CONNECT1002710024  
CONNECT100151001610017  
CONNECT100221002310020  
CONNECT1003010028100331003210031  
CONNECT1003310030100341003710035  
CONNECT1003710040100331003910038  
CONNECT1002910028  
CONNECT1003110030  
CONNECT1003210030  
CONNECT1003410033  
CONNECT1003610035  
CONNECT1003810037  
CONNECT1003910037  
CONNECT1004010037  
CONNECT100281003010029  
CONNECT100351003610033  
CONNECT1004310041100461004510044  
CONNECT1004610043100471005010048  
CONNECT1005010046100511005310052  
CONNECT1004210041  
CONNECT1004410043  
CONNECT1004510043  
CONNECT1004710046  
CONNECT1004910048  
CONNECT1005110050

CONNECT1005210050  
CONNECT1005310050  
CONNECT100411004210043  
CONNECT100481004610049  
CONNECT1005610057100591005410058  
CONNECT1005910061100631006010056  
CONNECT1006310065100591006410066  
CONNECT1005510054  
CONNECT1005710056  
CONNECT1005810056  
CONNECT1006010059  
CONNECT1006210061  
CONNECT1006410063  
CONNECT1006510063  
CONNECT1006610063  
CONNECT100541005510056  
CONNECT100611006210059  
CONNECT1006910071100671007210070  
CONNECT1007210069100741007610073  
CONNECT1007610079100721007710078  
CONNECT1006810067  
CONNECT1007010069  
CONNECT1007110069  
CONNECT1007310072  
CONNECT1007510074  
CONNECT1007710076  
CONNECT1007810076  
CONNECT1007910076  
CONNECT100671006910068  
CONNECT100741007510072  
CONNECT1008210080100831008510084  
CONNECT1008510082100891008710086  
CONNECT1008910085100901009110092  
CONNECT1008110080  
CONNECT1008310082  
CONNECT1008410082  
CONNECT1008610085  
CONNECT1008810087  
CONNECT1009010089  
CONNECT1009110089  
CONNECT1009210089  
CONNECT100801008210081  
CONNECT100871008510088  
CONNECT1009510098100931009610097  
CONNECT1009810102100951010010099  
CONNECT1010210103101051009810104  
CONNECT1009410093  
CONNECT1009610095  
CONNECT1009710095  
CONNECT1009910098  
CONNECT1010110100  
CONNECT1010310102  
CONNECT1010410102  
CONNECT1010510102  
CONNECT100931009410095  
CONNECT101001009810101  
CONNECT1010810110101091011110106

CONNECT1011110108101121011510113  
CONNECT1011510116101171011110118  
CONNECT1010710106  
CONNECT1010910108  
CONNECT1011010108  
CONNECT1011210111  
CONNECT1011410113  
CONNECT1011610115  
CONNECT1011710115  
CONNECT1011810115  
CONNECT101061010810107  
CONNECT101131011110114  
CONNECT1012110122101191012410123  
CONNECT1012410128101251012610121  
CONNECT1012810129101301013110124  
CONNECT1012010119  
CONNECT1012210121  
CONNECT1012310121  
CONNECT1012510124  
CONNECT1012710126  
CONNECT1012910128  
CONNECT1013010128  
CONNECT1013110128  
CONNECT101191012010121  
CONNECT101261012710124  
CONNECT1013410132101361013510137  
CONNECT1013710139101381014110134  
CONNECT1014110142101371014410143  
CONNECT1013310132  
CONNECT1013510134  
CONNECT1013610134  
CONNECT1013810137  
CONNECT1014010139  
CONNECT1014210141  
CONNECT1014310141  
CONNECT1014410141  
CONNECT101321013310134  
CONNECT101391014010137  
CONNECT1014710145101491015010148  
CONNECT1015010152101471015110154  
CONNECT1015410155101571015010156  
CONNECT1014610145  
CONNECT1014810147  
CONNECT1014910147  
CONNECT1015110150  
CONNECT1015310152  
CONNECT1015510154  
CONNECT1015610154  
CONNECT1015710154  
CONNECT101451014610147  
CONNECT101521015310150  
CONNECT1016010163101581016110162  
CONNECT1016310164101671016010165  
CONNECT1016710163101691017010168  
CONNECT1015910158  
CONNECT1016110160  
CONNECT1016210160



CONECT1016410163  
CONECT1016610165  
CONECT1016810167  
CONECT1016910167  
CONECT1017010167  
CONECT101581015910160  
CONECT101651016310166  
CONECT1017310171101741017610175  
CONECT1017610178101771017310180  
CONECT1018010182101811017610183  
CONECT1017210171  
CONECT1017410173  
CONECT1017510173  
CONECT1017710176  
CONECT1017910178  
CONECT1018110180  
CONECT1018210180  
CONECT1018310180  
CONECT101711017310172  
CONECT101781017910176  
CONECT1018610189101871018810184  
CONECT1018910193101901018610191  
CONECT1019310189101951019610194  
CONECT1018510184  
CONECT1018710186  
CONECT1018810186  
CONECT1019010189  
CONECT1019210191  
CONECT1019410193  
CONECT1019510193  
CONECT1019610193  
CONECT101841018510186  
CONECT101911018910192  
CONECT1019910197102011020010202  
CONECT1020210203101991020610204  
CONECT1020610209102081020710202  
CONECT1019810197  
CONECT1020010199  
CONECT1020110199  
CONECT1020310202  
CONECT1020510204  
CONECT1020710206  
CONECT1020810206  
CONECT1020910206  
CONECT101971019810199  
CONECT102041020210205  
CONECT1021210214102131021510210  
CONECT1021510212102161021710219  
CONECT1021910221102201021510222  
CONECT1021110210  
CONECT1021310212  
CONECT1021410212  
CONECT1021610215  
CONECT1021810217  
CONECT1022010219  
CONECT1022110219  
CONECT1022210219

CONNECT102101021210211  
CONNECT102171021810215  
CONNECT1022510228102271022310226  
CONNECT1022810232102251023010229  
CONNECT1023210228102351023410233  
CONNECT1022410223  
CONNECT1022610225  
CONNECT1022710225  
CONNECT1022910228  
CONNECT1023110230  
CONNECT1023310232  
CONNECT1023410232  
CONNECT1023510232  
CONNECT102231022410225  
CONNECT102301022810231  
CONNECT1023810236102401023910241  
CONNECT1024110243102381024510242  
CONNECT1024510248102471024610241  
CONNECT1023710236  
CONNECT1023910238  
CONNECT1024010238  
CONNECT1024210241  
CONNECT1024410243  
CONNECT1024610245  
CONNECT1024710245  
CONNECT1024810245  
CONNECT102361023710238  
CONNECT102431024110244  
CONNECT1025110253102541025210249  
CONNECT1025410251102551025610258  
CONNECT1025810259102541026010261  
CONNECT1025010249  
CONNECT1025210251  
CONNECT1025310251  
CONNECT1025510254  
CONNECT1025710256  
CONNECT1025910258  
CONNECT1026010258  
CONNECT1026110258  
CONNECT102491025110250  
CONNECT102561025410257  
CONNECT1026410267102621026610265  
CONNECT1026710271102681026910264  
CONNECT1027110272102671027410273  
CONNECT1026310262  
CONNECT1026510264  
CONNECT1026610264  
CONNECT1026810267  
CONNECT1027010269  
CONNECT1027210271  
CONNECT1027310271  
CONNECT1027410271  
CONNECT102621026310264  
CONNECT102691026710270  
CONNECT1027710279102801027510278  
CONNECT1028010277102821028110284  
CONNECT1028410285102801028610287

CONNECT1027610275  
CONNECT1027810277  
CONNECT1027910277  
CONNECT1028110280  
CONNECT1028310282  
CONNECT1028510284  
CONNECT1028610284  
CONNECT1028710284  
CONNECT102751027710276  
CONNECT102821028010283  
CONNECT1029010293102921028810291  
CONNECT1029310294102901029510297  
CONNECT1029710293103001029810299  
CONNECT1028910288  
CONNECT1029110290  
CONNECT1029210290  
CONNECT1029410293  
CONNECT1029610295  
CONNECT1029810297  
CONNECT1029910297  
CONNECT1030010297  
CONNECT102881029010289  
CONNECT102951029310296  
CONNECT1030310306103011030410305  
CONNECT1030610308103031031010307  
CONNECT1031010311103121030610313  
CONNECT1030210301  
CONNECT1030410303  
CONNECT1030510303  
CONNECT1030710306  
CONNECT1030910308  
CONNECT1031110310  
CONNECT1031210310  
CONNECT1031310310  
CONNECT103011030310302  
CONNECT103081030910306  
CONNECT1031610317103191031810314  
CONNECT1031910320103211032310316  
CONNECT1032310325103191032610324  
CONNECT1031510314  
CONNECT1031710316  
CONNECT1031810316  
CONNECT1032010319  
CONNECT1032210321  
CONNECT1032410323  
CONNECT1032510323  
CONNECT1032610323  
CONNECT103141031510316  
CONNECT103211031910322  
CONNECT1032910327103321033110330  
CONNECT1033210333103291033410336  
CONNECT1033610332103371033810339  
CONNECT1032810327  
CONNECT1033010329  
CONNECT1033110329  
CONNECT1033310332  
CONNECT1033510334

CONNECT1033710336  
CONNECT1033810336  
CONNECT1033910336  
CONNECT103271032810329  
CONNECT103341033210335  
CONNECT1034210343103451034410340  
CONNECT1034510349103421034610347  
CONNECT1034910345103501035110352  
CONNECT1034110340  
CONNECT1034310342  
CONNECT1034410342  
CONNECT1034610345  
CONNECT1034810347  
CONNECT1035010349  
CONNECT1035110349  
CONNECT1035210349  
CONNECT103401034210341  
CONNECT103471034510348  
CONNECT1035510357103581035310356  
CONNECT1035810362103551035910360  
CONNECT1036210364103581036310365  
CONNECT1035410353  
CONNECT1035610355  
CONNECT1035710355  
CONNECT1035910358  
CONNECT1036110360  
CONNECT1036310362  
CONNECT1036410362  
CONNECT1036510362  
CONNECT103531035510354  
CONNECT103601035810361  
CONNECT1036810369103711037010366  
CONNECT1037110368103751037210373  
CONNECT1037510378103711037710376  
CONNECT1036710366  
CONNECT1036910368  
CONNECT1037010368  
CONNECT1037210371  
CONNECT1037410373  
CONNECT1037610375  
CONNECT1037710375  
CONNECT1037810375  
CONNECT103661036810367  
CONNECT103731037110374  
CONNECT1038110383103841038210379  
CONNECT1038410388103851038610381  
CONNECT1038810384103891039010391  
CONNECT1038010379  
CONNECT1038210381  
CONNECT1038310381  
CONNECT1038510384  
CONNECT1038710386  
CONNECT1038910388  
CONNECT1039010388  
CONNECT1039110388  
CONNECT103791038010381  
CONNECT103861038410387

CONECT1039410395103921039710396  
CONECT1039710394103981039910401  
CONECT1040110402104041039710403  
CONECT1039310392  
CONECT1039510394  
CONECT1039610394  
CONECT1039810397  
CONECT1040010399  
CONECT1040210401  
CONECT1040310401  
CONECT1040410401  
CONECT103921039410393  
CONECT103991039710400  
CONECT1040710410104091040810405  
CONECT1041010412104071041410411  
CONECT1041410410104161041510417  
CONECT1040610405  
CONECT1040810407  
CONECT1040910407  
CONECT1041110410  
CONECT1041310412  
CONECT1041510414  
CONECT1041610414  
CONECT1041710414  
CONECT104051040610407  
CONECT104121041010413  
CONECT1042010418104231042110422  
CONECT1042310420104271042510424  
CONECT1042710429104231042810430  
CONECT1041910418  
CONECT1042110420  
CONECT1042210420  
CONECT1042410423  
CONECT1042610425  
CONECT1042810427  
CONECT1042910427  
CONECT1043010427  
CONECT104181042010419  
CONECT104251042310426  
CONECT1043310434104361043110435  
CONECT1043610440104331043810437  
CONECT1044010442104361044310441  
CONECT1043210431  
CONECT1043410433  
CONECT1043510433  
CONECT1043710436  
CONECT1043910438  
CONECT1044110440  
CONECT1044210440  
CONECT1044310440  
CONECT104311043210433  
CONECT104381043610439  
CONECT1044610448104471044910444  
CONECT1044910453104501045110446  
CONECT1045310456104491045510454  
CONECT1044510444  
CONECT1044710446

CONNECT1044810446  
CONNECT1045010449  
CONNECT1045210451  
CONNECT1045410453  
CONNECT1045510453  
CONNECT1045610453  
CONNECT104441044510446  
CONNECT104511044910452  
CONNECT1045910462104611046010457  
CONNECT1046210459104661046410463  
CONNECT1046610468104621046910467  
CONNECT1045810457  
CONNECT1046010459  
CONNECT1046110459  
CONNECT1046310462  
CONNECT1046510464  
CONNECT1046710466  
CONNECT1046810466  
CONNECT1046910466  
CONNECT104571045910458  
CONNECT104641046210465  
CONNECT1047210470104731047410475  
CONNECT1047510479104721047710476  
CONNECT1047910480104811048210475  
CONNECT1047110470  
CONNECT1047310472  
CONNECT1047410472  
CONNECT1047610475  
CONNECT1047810477  
CONNECT1048010479  
CONNECT1048110479  
CONNECT1048210479  
CONNECT104701047110472  
CONNECT104771047810475  
CONNECT1048510488104831048710486  
CONNECT1048810490104921048510489  
CONNECT1049210488104941049510493  
CONNECT1048410483  
CONNECT1048610485  
CONNECT1048710485  
CONNECT1048910488  
CONNECT1049110490  
CONNECT1049310492  
CONNECT1049410492  
CONNECT1049510492  
CONNECT104831048510484  
CONNECT104901048810491  
CONNECT1049810501104991050010496  
CONNECT1050110498105021050310505  
CONNECT1050510501105071050610508  
CONNECT1049710496  
CONNECT1049910498  
CONNECT1050010498  
CONNECT1050210501  
CONNECT1050410503  
CONNECT1050610505  
CONNECT1050710505

CONECT1050810505  
CONECT104961049710498  
CONECT105031050110504  
CONECT1051110513105121050910514  
CONECT1051410518105161051110515  
CONECT1051810519105201051410521  
CONECT1051010509  
CONECT1051210511  
CONECT1051310511  
CONECT1051510514  
CONECT1051710516  
CONECT1051910518  
CONECT1052010518  
CONECT1052110518  
CONECT105091051010511  
CONECT105161051710514  
CONECT1052410527105221052610525  
CONECT1052710524105311052910528  
CONECT1053110527105331053210534  
CONECT1052310522  
CONECT1052510524  
CONECT1052610524  
CONECT1052810527  
CONECT1053010529  
CONECT1053210531  
CONECT1053310531  
CONECT1053410531  
CONECT105221052410523  
CONECT105291052710530  
CONECT1053710540105391053810535  
CONECT1054010537105411054410542  
CONECT1054410546105471054010545  
CONECT1053610535  
CONECT1053810537  
CONECT1053910537  
CONECT1054110540  
CONECT1054310542  
CONECT1054510544  
CONECT1054610544  
CONECT1054710544  
CONECT105351053710536  
CONECT105421054010543  
CONECT1055010553105521054810551  
CONECT1055310555105541055710550  
CONECT1055710553105601055910558  
CONECT1054910548  
CONECT1055110550  
CONECT1055210550  
CONECT1055410553  
CONECT1055610555  
CONECT1055810557  
CONECT1055910557  
CONECT1056010557  
CONECT105481054910550  
CONECT105551055310556  
CONECT1056310566105651056410561  
CONECT1056610568105631056710570

CONNECT1057010566105711057310572  
CONNECT1056210561  
CONNECT1056410563  
CONNECT1056510563  
CONNECT1056710566  
CONNECT1056910568  
CONNECT1057110570  
CONNECT1057210570  
CONNECT1057310570  
CONNECT105611056310562  
CONNECT105681056610569  
CONNECT1057610574105781057710579  
CONNECT1057910576105831058110580  
CONNECT1058310584105861057910585  
CONNECT1057510574  
CONNECT1057710576  
CONNECT1057810576  
CONNECT1058010579  
CONNECT1058210581  
CONNECT1058410583  
CONNECT1058510583  
CONNECT1058610583  
CONNECT105741057610575  
CONNECT105811058210579  
CONNECT1058910591105921059010587  
CONNECT1059210596105891059310594  
CONNECT1059610592105981059910597  
CONNECT1058810587  
CONNECT1059010589  
CONNECT1059110589  
CONNECT1059310592  
CONNECT1059510594  
CONNECT1059710596  
CONNECT1059810596  
CONNECT1059910596  
CONNECT105871058810589  
CONNECT105941059210595  
CONNECT1060210600106031060410605  
CONNECT1060510607106061060210609  
CONNECT1060910610106121060510611  
CONNECT1060110600  
CONNECT1060310602  
CONNECT1060410602  
CONNECT1060610605  
CONNECT1060810607  
CONNECT1061010609  
CONNECT1061110609  
CONNECT1061210609  
CONNECT106001060110602  
CONNECT106071060810605  
CONNECT1061510617106131061610618  
CONNECT1061810619106221061510620  
CONNECT1062210625106231062410618  
CONNECT1061410613  
CONNECT1061610615  
CONNECT1061710615  
CONNECT1061910618



CONNECT1062110620  
CONNECT1062310622  
CONNECT1062410622  
CONNECT1062510622  
CONNECT106131061510614  
CONNECT106201062110618  
CONNECT1062810626106301063110629  
CONNECT1063110633106351062810632  
CONNECT1063510631106381063610637  
CONNECT1062710626  
CONNECT1062910628  
CONNECT1063010628  
CONNECT1063210631  
CONNECT1063410633  
CONNECT1063610635  
CONNECT1063710635  
CONNECT1063810635  
CONNECT106261062710628  
CONNECT106331063410631  
CONNECT1064110639106431064210644  
CONNECT1064410641106481064610645  
CONNECT1064810651106501064410649  
CONNECT1064010639  
CONNECT1064210641  
CONNECT1064310641  
CONNECT1064510644  
CONNECT1064710646  
CONNECT1064910648  
CONNECT1065010648  
CONNECT1065110648  
CONNECT106391064010641  
CONNECT106461064710644  
CONNECT1065410656106521065710655  
CONNECT1065710654106591066110658  
CONNECT1066110664106631065710662  
CONNECT1065310652  
CONNECT1065510654  
CONNECT1065610654  
CONNECT1065810657  
CONNECT1066010659  
CONNECT1066210661  
CONNECT1066310661  
CONNECT1066410661  
CONNECT106521065410653  
CONNECT106591065710660  
CONNECT1066710669106701066810665  
CONNECT1067010674106671067110672  
CONNECT1067410670106761067710675  
CONNECT1066610665  
CONNECT1066810667  
CONNECT1066910667  
CONNECT1067110670  
CONNECT1067310672  
CONNECT1067510674  
CONNECT1067610674  
CONNECT1067710674  
CONNECT106651066610667

CONNECT106721067310670  
CONNECT1068010683106781068110682  
CONNECT1068310685106801068410687  
CONNECT1068710683106891069010688  
CONNECT1067910678  
CONNECT1068110680  
CONNECT1068210680  
CONNECT1068410683  
CONNECT1068610685  
CONNECT1068810687  
CONNECT1068910687  
CONNECT1069010687  
CONNECT106781068010679  
CONNECT106851068310686  
CONNECT1069310696106951069410691  
CONNECT1069610700106981069710693  
CONNECT1070010696107011070210703  
CONNECT1069210691  
CONNECT1069410693  
CONNECT1069510693  
CONNECT1069710696  
CONNECT1069910698  
CONNECT1070110700  
CONNECT1070210700  
CONNECT1070310700  
CONNECT106911069210693  
CONNECT106981069610699  
CONNECT1070610707107041070810709  
CONNECT1070910706107101071310711  
CONNECT1071310716107141071510709  
CONNECT1070510704  
CONNECT1070710706  
CONNECT1070810706  
CONNECT1071010709  
CONNECT1071210711  
CONNECT1071410713  
CONNECT1071510713  
CONNECT1071610713  
CONNECT107041070610705  
CONNECT107111071210709  
CONNECT1071910717107211072210720  
CONNECT1072210726107191072410723  
CONNECT1072610727107221072910728  
CONNECT1071810717  
CONNECT1072010719  
CONNECT1072110719  
CONNECT1072310722  
CONNECT1072510724  
CONNECT1072710726  
CONNECT1072810726  
CONNECT1072910726  
CONNECT107171071810719  
CONNECT107241072210725  
CONNECT1073210733107341073010735  
CONNECT1073510732107391073710736  
CONNECT1073910740107411073510742  
CONNECT1073110730

CONNECT1073310732  
CONNECT1073410732  
CONNECT1073610735  
CONNECT1073810737  
CONNECT1074010739  
CONNECT1074110739  
CONNECT1074210739  
CONNECT107301073210731  
CONNECT107371073810735  
CONNECT1074510748107461074310747  
CONNECT1074810752107491075010745  
CONNECT1075210755107481075310754  
CONNECT1074410743  
CONNECT1074610745  
CONNECT1074710745  
CONNECT1074910748  
CONNECT1075110750  
CONNECT1075310752  
CONNECT1075410752  
CONNECT1075510752  
CONNECT107431074410745  
CONNECT107501074810751  
CONNECT1075810761107591076010756  
CONNECT1076110765107621076310758  
CONNECT1076510761107661076810767  
CONNECT1075710756  
CONNECT1075910758  
CONNECT1076010758  
CONNECT1076210761  
CONNECT1076410763  
CONNECT1076610765  
CONNECT1076710765  
CONNECT1076810765  
CONNECT107561075710758  
CONNECT107631076110764  
CONNECT1077110772107691077410773  
CONNECT1077410771107761077510778  
CONNECT1077810781107741078010779  
CONNECT1077010769  
CONNECT1077210771  
CONNECT1077310771  
CONNECT1077510774  
CONNECT1077710776  
CONNECT1077910778  
CONNECT1078010778  
CONNECT1078110778  
CONNECT107691077110770  
CONNECT107761077710774  
CONNECT1078410787107851078610782  
CONNECT1078710788107841079110789  
CONNECT1079110787107921079310794  
CONNECT1078310782  
CONNECT1078510784  
CONNECT1078610784  
CONNECT1078810787  
CONNECT1079010789  
CONNECT1079210791

CONECT1079310791  
CONECT1079410791  
CONECT107821078410783  
CONECT107891078710790  
CONECT1079710798107951080010799  
CONECT1080010801107971080410802  
CONECT1080410805108001080610807  
CONECT1079610795  
CONECT1079810797  
CONECT1079910797  
CONECT1080110800  
CONECT1080310802  
CONECT1080510804  
CONECT1080610804  
CONECT1080710804  
CONECT107951079610797  
CONECT108021080010803  
CONECT1081010808108131081110812  
CONECT1081310810108141081710815  
CONECT1081710813108181081910820  
CONECT1080910808  
CONECT1081110810  
CONECT1081210810  
CONECT1081410813  
CONECT1081610815  
CONECT1081810817  
CONECT1081910817  
CONECT1082010817  
CONECT108081081010809  
CONECT108151081310816  
CONECT1082310825108211082610824  
CONECT1082610828108231083010827  
CONECT1083010833108261083110832  
CONECT1082210821  
CONECT1082410823  
CONECT1082510823  
CONECT1082710826  
CONECT1082910828  
CONECT1083110830  
CONECT1083210830  
CONECT1083310830  
CONECT108211082310822  
CONECT108281082910826  
CONECT1083610839108371083410838  
CONECT1083910840108361084110843  
CONECT1084310839108451084610844  
CONECT1083510834  
CONECT1083710836  
CONECT1083810836  
CONECT1084010839  
CONECT1084210841  
CONECT1084410843  
CONECT1084510843  
CONECT1084610843  
CONECT108341083610835  
CONECT108411083910842  
CONECT1084910850108511084710852

CONNECT1085210849108541085310856  
CONNECT1085610858108591085210857  
CONNECT1084810847  
CONNECT1085010849  
CONNECT1085110849  
CONNECT1085310852  
CONNECT1085510854  
CONNECT1085710856  
CONNECT1085810856  
CONNECT1085910856  
CONNECT108471084910848  
CONNECT108541085510852  
CONNECT1086210865108631086010864  
CONNECT1086510862108671086610869  
CONNECT1086910865108701087210871  
CONNECT1086110860  
CONNECT1086310862  
CONNECT1086410862  
CONNECT1086610865  
CONNECT1086810867  
CONNECT1087010869  
CONNECT1087110869  
CONNECT1087210869  
CONNECT108601086210861  
CONNECT108671086510868  
CONNECT1087510873108781087710876  
CONNECT1087810882108751088010879  
CONNECT1088210878108841088310885  
CONNECT1087410873  
CONNECT1087610875  
CONNECT1087710875  
CONNECT1087910878  
CONNECT1088110880  
CONNECT1088310882  
CONNECT1088410882  
CONNECT1088510882  
CONNECT108731087510874  
CONNECT108801087810881  
CONNECT1088810890108911088610889  
CONNECT1089110893108881089210895  
CONNECT1089510891108961089710898  
CONNECT1088710886  
CONNECT1088910888  
CONNECT1089010888  
CONNECT1089210891  
CONNECT1089410893  
CONNECT1089610895  
CONNECT1089710895  
CONNECT1089810895  
CONNECT108861088810887  
CONNECT108931089110894  
CONNECT1090110899109031090210904  
CONNECT1090410905109061090110908  
CONNECT1090810911109091091010904  
CONNECT1090010899  
CONNECT1090210901  
CONNECT1090310901

CONNECT1090510904  
CONNECT1090710906  
CONNECT1090910908  
CONNECT1091010908  
CONNECT1091110908  
CONNECT108991090010901  
CONNECT109061090710904  
CONNECT1091410917109121091510916  
CONNECT1091710919109141091810921  
CONNECT1092110917109231092410922  
CONNECT1091310912  
CONNECT1091510914  
CONNECT1091610914  
CONNECT1091810917  
CONNECT1092010919  
CONNECT1092210921  
CONNECT1092310921  
CONNECT1092410921  
CONNECT109121091310914  
CONNECT109191091710920  
CONNECT1092710925109291093010928  
CONNECT1093010931109341092710932  
CONNECT1093410936109371093010935  
CONNECT1092610925  
CONNECT1092810927  
CONNECT1092910927  
CONNECT1093110930  
CONNECT1093310932  
CONNECT1093510934  
CONNECT1093610934  
CONNECT1093710934  
CONNECT109251092610927  
CONNECT109321093310930  
CONNECT1094010943109411093810942  
CONNECT1094310944109471094010945  
CONNECT1094710943109501094810949  
CONNECT1093910938  
CONNECT1094110940  
CONNECT1094210940  
CONNECT1094410943  
CONNECT1094610945  
CONNECT1094810947  
CONNECT1094910947  
CONNECT1095010947  
CONNECT109381093910940  
CONNECT109451094310946  
CONNECT1095310956109541095510951  
CONNECT1095610957109581095310960  
CONNECT1096010963109621096110956  
CONNECT1095210951  
CONNECT1095410953  
CONNECT1095510953  
CONNECT1095710956  
CONNECT1095910958  
CONNECT1096110960  
CONNECT1096210960  
CONNECT1096310960

CONNECT109511095210953  
CONNECT109581095610959  
CONNECT1096610967109641096910968  
CONNECT1096910973109711096610970  
CONNECT1097310975109691097410976  
CONNECT1096510964  
CONNECT1096710966  
CONNECT1096810966  
CONNECT1097010969  
CONNECT1097210971  
CONNECT1097410973  
CONNECT1097510973  
CONNECT1097610973  
CONNECT109641096510966  
CONNECT109711097210969  
CONNECT1097910977109821098010981  
CONNECT1098210986109791098410983  
CONNECT1098610989109871098210988  
CONNECT1097810977  
CONNECT1098010979  
CONNECT1098110979  
CONNECT1098310982  
CONNECT1098510984  
CONNECT1098710986  
CONNECT1098810986  
CONNECT1098910986  
CONNECT109771097910978  
CONNECT109841098510982  
CONNECT1099210990109931099510994  
CONNECT1099510996109921099710999  
CONNECT1099911001109951100011002  
CONNECT1099110990  
CONNECT1099310992  
CONNECT1099410992  
CONNECT1099610995  
CONNECT1099810997  
CONNECT1100010999  
CONNECT1100110999  
CONNECT1100210999  
CONNECT109901099210991  
CONNECT109971099510998  
CONNECT1100511007110061100311008  
CONNECT1100811009110101101211005  
CONNECT1101211013110141100811015  
CONNECT1100411003  
CONNECT1100611005  
CONNECT1100711005  
CONNECT1100911008  
CONNECT1101111010  
CONNECT1101311012  
CONNECT1101411012  
CONNECT1101511012  
CONNECT110031100511004  
CONNECT110101101111008  
CONNECT1101811016110201101911021  
CONNECT1102111023110181102511022  
CONNECT1102511027110261102811021

CONNECT1101711016  
CONNECT1101911018  
CONNECT1102011018  
CONNECT1102211021  
CONNECT1102411023  
CONNECT1102611025  
CONNECT1102711025  
CONNECT1102811025  
CONNECT110161101811017  
CONNECT110231102411021  
CONNECT1103111033110291103211034  
CONNECT1103411038110351103611031  
CONNECT1103811040110411103411039  
CONNECT1103011029  
CONNECT1103211031  
CONNECT1103311031  
CONNECT1103511034  
CONNECT1103711036  
CONNECT1103911038  
CONNECT1104011038  
CONNECT1104111038  
CONNECT110291103011031  
CONNECT110361103711034  
CONNECT1104411045110421104711046  
CONNECT1104711049110441105111048  
CONNECT1105111053110521104711054  
CONNECT1104311042  
CONNECT1104511044  
CONNECT1104611044  
CONNECT1104811047  
CONNECT1105011049  
CONNECT1105211051  
CONNECT1105311051  
CONNECT1105411051  
CONNECT110421104411043  
CONNECT110491104711050  
CONNECT1105711055110581106011059  
CONNECT1106011061110621105711064  
CONNECT1106411060110651106711066  
CONNECT1105611055  
CONNECT1105811057  
CONNECT1105911057  
CONNECT1106111060  
CONNECT1106311062  
CONNECT1106511064  
CONNECT1106611064  
CONNECT1106711064  
CONNECT110551105611057  
CONNECT110621106011063  
CONNECT1107011072110711106811073  
CONNECT1107311074110701107511077  
CONNECT1107711079110801107311078  
CONNECT1106911068  
CONNECT1107111070  
CONNECT1107211070  
CONNECT1107411073  
CONNECT1107611075



CONECT1107811077  
CONECT1107911077  
CONECT1108011077  
CONECT110681106911070  
CONECT110751107611073  
CONECT1108311085110841108111086  
CONECT1108611090110871108311088  
CONECT1109011092110911109311086  
CONECT1108211081  
CONECT1108411083  
CONECT1108511083  
CONECT1108711086  
CONECT1108911088  
CONECT1109111090  
CONECT1109211090  
CONECT1109311090  
CONECT110811108311082  
CONECT110881108911086  
CONECT1109611099110981109711094  
CONECT1109911096111011110011103  
CONECT1110311106110991110411105  
CONECT1109511094  
CONECT1109711096  
CONECT1109811096  
CONECT1110011099  
CONECT1110211101  
CONECT1110411103  
CONECT1110511103  
CONECT1110611103  
CONECT110941109611095  
CONECT111011109911102  
CONECT1110911112111071111111110  
CONECT1111211109111161111311114  
CONECT1111611112111171111811119  
CONECT1110811107  
CONECT1111011109  
CONECT1111111109  
CONECT1111311112  
CONECT1111511114  
CONECT1111711116  
CONECT1111811116  
CONECT1111911116  
CONECT111071110911108  
CONECT111141111211115  
CONECT1112211120111241112311125  
CONECT1112511127111261112911122  
CONECT1112911132111311112511130  
CONECT1112111120  
CONECT1112311122  
CONECT1112411122  
CONECT1112611125  
CONECT1112811127  
CONECT1113011129  
CONECT1113111129  
CONECT1113211129  
CONECT111201112211121  
CONECT111271112811125

CONECT1113511136111381113311137  
CONECT1113811139111421113511140  
CONECT1114211143111381114511144  
CONECT1113411133  
CONECT1113611135  
CONECT1113711135  
CONECT1113911138  
CONECT1114111140  
CONECT1114311142  
CONECT1114411142  
CONECT1114511142  
CONECT111331113411135  
CONECT111401114111138  
CONECT1114811146111501115111149  
CONECT1115111152111481115511153  
CONECT1115511158111511115611157  
CONECT1114711146  
CONECT1114911148  
CONECT1115011148  
CONECT1115211151  
CONECT1115411153  
CONECT1115611155  
CONECT1115711155  
CONECT1115811155  
CONECT111461114711148  
CONECT111531115111154  
CONECT1116111162111591116411163  
CONECT1116411161111661116811165  
CONECT1116811169111641117011171  
CONECT1116011159  
CONECT1116211161  
CONECT1116311161  
CONECT1116511164  
CONECT1116711166  
CONECT1116911168  
CONECT1117011168  
CONECT1117111168  
CONECT111591116111160  
CONECT111661116411167  
CONECT1117411177111751117611172  
CONECT1117711178111811117411179  
CONECT1118111177111831118411182  
CONECT1117311172  
CONECT1117511174  
CONECT1117611174  
CONECT1117811177  
CONECT1118011179  
CONECT1118211181  
CONECT1118311181  
CONECT1118411181  
CONECT111721117411173  
CONECT111791117711180  
CONECT1118711185111901118811189  
CONECT1119011187111911119411192  
CONECT1119411195111901119711196  
CONECT1118611185  
CONECT1118811187

CONECT1118911187  
CONECT1119111190  
CONECT1119311192  
CONECT1119511194  
CONECT1119611194  
CONECT1119711194  
CONECT111851118711186  
CONECT111921119011193  
CONECT1120011203112011119811202  
CONECT1120311204112001120711205  
CONECT1120711203112101120811209  
CONECT1119911198  
CONECT1120111200  
CONECT1120211200  
CONECT1120411203  
CONECT1120611205  
CONECT1120811207  
CONECT1120911207  
CONECT1121011207  
CONECT111981119911200  
CONECT112051120611203  
CONECT1121311216112111121511214  
CONECT1121611220112131121711218  
CONECT1122011216112231122211221  
CONECT1121211211  
CONECT1121411213  
CONECT1121511213  
CONECT1121711216  
CONECT1121911218  
CONECT1122111220  
CONECT1122211220  
CONECT1122311220  
CONECT112111121311212  
CONECT112181121611219  
CONECT1122611224112291122811227  
CONECT1122911233112311123011226  
CONECT1123311229112341123611235  
CONECT1122511224  
CONECT1122711226  
CONECT1122811226  
CONECT1123011229  
CONECT1123211231  
CONECT1123411233  
CONECT1123511233  
CONECT1123611233  
CONECT112241122511226  
CONECT112311122911232  
CONECT1123911237112401124211241  
CONECT1124211239112441124611243  
CONECT1124611249112481124211247  
CONECT1123811237  
CONECT1124011239  
CONECT1124111239  
CONECT1124311242  
CONECT1124511244  
CONECT1124711246  
CONECT1124811246

CONNECT1124911246  
CONNECT112371123911238  
CONNECT112441124511242  
CONNECT1125211255112501125411253  
CONNECT1125511252112571125911256  
CONNECT1125911262112551126111260  
CONNECT1125111250  
CONNECT1125311252  
CONNECT1125411252  
CONNECT1125611255  
CONNECT1125811257  
CONNECT1126011259  
CONNECT1126111259  
CONNECT1126211259  
CONNECT112501125211251  
CONNECT112571125511258  
CONNECT1126511268112661126711263  
CONNECT1126811272112651127011269  
CONNECT1127211268112731127511274  
CONNECT1126411263  
CONNECT1126611265  
CONNECT1126711265  
CONNECT1126911268  
CONNECT1127111270  
CONNECT1127311272  
CONNECT1127411272  
CONNECT1127511272  
CONNECT112631126511264  
CONNECT112701126811271  
CONNECT1127811281112801127911276  
CONNECT1128111285112831127811282  
CONNECT1128511281112861128711288  
CONNECT1127711276  
CONNECT1127911278  
CONNECT1128011278  
CONNECT1128211281  
CONNECT1128411283  
CONNECT1128611285  
CONNECT1128711285  
CONNECT1128811285  
CONNECT112761127711278  
CONNECT112831128111284  
CONNECT1129111294112891129311292  
CONNECT1129411291112951129611298  
CONNECT1129811299112941130111300  
CONNECT1129011289  
CONNECT1129211291  
CONNECT1129311291  
CONNECT1129511294  
CONNECT1129711296  
CONNECT1129911298  
CONNECT1130011298  
CONNECT1130111298  
CONNECT112891129111290  
CONNECT112961129411297  
CONNECT1130411305113021130611307  
CONNECT1130711308113041130911311

CONECT1131111313113121131411307  
CONECT1130311302  
CONECT1130511304  
CONECT1130611304  
CONECT1130811307  
CONECT1131011309  
CONECT1131211311  
CONECT1131311311  
CONECT1131411311  
CONECT113021130411303  
CONECT113091131011307  
CONECT1131711315113181131911320  
CONECT1132011317113221132411321  
CONECT1132411327113201132611325  
CONECT1131611315  
CONECT1131811317  
CONECT1131911317  
CONECT1132111320  
CONECT1132311322  
CONECT1132511324  
CONECT1132611324  
CONECT1132711324  
CONECT113151131711316  
CONECT113221132311320  
CONECT1133011332113281133311331  
CONECT1133311337113301133411335  
CONECT1133711333113381133911340  
CONECT1132911328  
CONECT1133111330  
CONECT1133211330  
CONECT1133411333  
CONECT1133611335  
CONECT1133811337  
CONECT1133911337  
CONECT1134011337  
CONECT113281132911330  
CONECT113351133311336  
CONECT1134311345113411134411346  
CONECT1134611347113501134311348  
CONECT1135011352113511135311346  
CONECT1134211341  
CONECT1134411343  
CONECT1134511343  
CONECT1134711346  
CONECT1134911348  
CONECT1135111350  
CONECT1135211350  
CONECT1135311350  
CONECT113411134311342  
CONECT113481134611349  
CONECT1135611359113571135411358  
CONECT1135911356113601136311361  
CONECT1136311366113591136411365  
CONECT1135511354  
CONECT1135711356  
CONECT1135811356  
CONECT1136011359

CONECT1136211361  
CONECT1136411363  
CONECT1136511363  
CONECT1136611363  
CONECT113541135511356  
CONECT113611135911362  
CONECT1136911371113701136711372  
CONECT1137211376113731136911374  
CONECT1137611379113771137811372  
CONECT1136811367  
CONECT1137011369  
CONECT1137111369  
CONECT1137311372  
CONECT1137511374  
CONECT1137711376  
CONECT1137811376  
CONECT1137911376  
CONECT113671136811369  
CONECT113741137211375  
CONECT1138211383113851138011384  
CONECT1138511387113861138911382  
CONECT1138911390113851139111392  
CONECT1138111380  
CONECT1138311382  
CONECT1138411382  
CONECT1138611385  
CONECT1138811387  
CONECT1139011389  
CONECT1139111389  
CONECT1139211389  
CONECT113801138111382  
CONECT113871138511388  
CONECT1139511396113931139811397  
CONECT1139811402113951139911400  
CONECT1140211404113981140311405  
CONECT1139411393  
CONECT1139611395  
CONECT1139711395  
CONECT1139911398  
CONECT1140111400  
CONECT1140311402  
CONECT1140411402  
CONECT1140511402  
CONECT113931139411395  
CONECT114001139811401  
CONECT1140811410114091140611411  
CONECT1141111412114131140811415  
CONECT1141511418114171141111416  
CONECT1140711406  
CONECT1140911408  
CONECT1141011408  
CONECT1141211411  
CONECT1141411413  
CONECT1141611415  
CONECT1141711415  
CONECT1141811415  
CONECT114061140711408

CONNECT114131141411411  
CONNECT1142111419114241142211423  
CONNECT1142411426114211142511428  
CONNECT1142811424114301143111429  
CONNECT1142011419  
CONNECT1142211421  
CONNECT1142311421  
CONNECT1142511424  
CONNECT1142711426  
CONNECT1142911428  
CONNECT1143011428  
CONNECT1143111428  
CONNECT114191142111420  
CONNECT114261142411427  
CONNECT1143411436114321143511437  
CONNECT1143711439114411143411438  
CONNECT1144111442114431143711444  
CONNECT1143311432  
CONNECT1143511434  
CONNECT1143611434  
CONNECT1143811437  
CONNECT1144011439  
CONNECT1144211441  
CONNECT1144311441  
CONNECT1144411441  
CONNECT114321143311434  
CONNECT114391143711440  
CONNECT1144711449114451144811450  
CONNECT1145011447114511145211454  
CONNECT1145411457114561145011455  
CONNECT1144611445  
CONNECT1144811447  
CONNECT1144911447  
CONNECT1145111450  
CONNECT1145311452  
CONNECT1145511454  
CONNECT1145611454  
CONNECT1145711454  
CONNECT114451144711446  
CONNECT114521145311450  
CONNECT1146011461114631145811462  
CONNECT1146311460114641146711465  
CONNECT1146711468114631146911470  
CONNECT1145911458  
CONNECT1146111460  
CONNECT1146211460  
CONNECT1146411463  
CONNECT1146611465  
CONNECT1146811467  
CONNECT1146911467  
CONNECT1147011467  
CONNECT114581146011459  
CONNECT114651146311466  
CONNECT1147311474114761147111475  
CONNECT1147611478114771148011473  
CONNECT1148011482114831147611481  
CONNECT1147211471

CONECT1147411473  
CONECT1147511473  
CONECT1147711476  
CONECT1147911478  
CONECT1148111480  
CONECT1148211480  
CONECT1148311480  
CONECT114711147211473  
CONECT114781147911476  
CONECT1148611487114891148411488  
CONECT1148911493114911148611490  
CONECT1149311495114891149411496  
CONECT1148511484  
CONECT1148711486  
CONECT1148811486  
CONECT1149011489  
CONECT1149211491  
CONECT1149411493  
CONECT1149511493  
CONECT1149611493  
CONECT114841148511486  
CONECT114911149211489  
CONECT1149911500114971150111502  
CONECT1150211499115031150411506  
CONECT1150611509115081150711502  
CONECT1149811497  
CONECT1150011499  
CONECT1150111499  
CONECT1150311502  
CONECT1150511504  
CONECT1150711506  
CONECT1150811506  
CONECT1150911506  
CONECT114971149911498  
CONECT115041150511502  
CONECT1151211510115131151511514  
CONECT1151511517115191151611512  
CONECT1151911522115151152111520  
CONECT1151111510  
CONECT1151311512  
CONECT1151411512  
CONECT1151611515  
CONECT1151811517  
CONECT1152011519  
CONECT1152111519  
CONECT1152211519  
CONECT115101151111512  
CONECT115171151811515  
CONECT1152511526115231152811527  
CONECT1152811529115321152511530  
CONECT1153211533115351152811534  
CONECT1152411523  
CONECT1152611525  
CONECT1152711525  
CONECT1152911528  
CONECT1153111530  
CONECT1153311532



CONECT1153411532  
CONECT1153511532  
CONECT115231152411525  
CONECT115301152811531  
CONECT1153811540115391153611541  
CONECT1154111542115431154511538  
CONECT1154511547115481154111546  
CONECT1153711536  
CONECT1153911538  
CONECT1154011538  
CONECT1154211541  
CONECT1154411543  
CONECT1154611545  
CONECT1154711545  
CONECT1154811545  
CONECT115361153711538  
CONECT115431154111544  
CONECT1155111552115541155311549  
CONECT1155411556115581155511551  
CONECT1155811561115541156011559  
CONECT1155011549  
CONECT1155211551  
CONECT1155311551  
CONECT1155511554  
CONECT1155711556  
CONECT1155911558  
CONECT1156011558  
CONECT1156111558  
CONECT115491155011551  
CONECT115561155411557  
CONECT1156411562115651156611567  
CONECT1156711571115691156811564  
CONECT1157111574115721157311567  
CONECT1156311562  
CONECT1156511564  
CONECT1156611564  
CONECT1156811567  
CONECT1157011569  
CONECT1157211571  
CONECT1157311571  
CONECT1157411571  
CONECT115621156311564  
CONECT115691157011567  
CONECT1157711578115751158011579  
CONECT1158011582115771158111584  
CONECT1158411585115801158611587  
CONECT1157611575  
CONECT1157811577  
CONECT1157911577  
CONECT1158111580  
CONECT1158311582  
CONECT1158511584  
CONECT1158611584  
CONECT1158711584  
CONECT115751157711576  
CONECT115821158011583  
CONECT1159011593115881159211591

CONECT1159311590115951159411597  
CONECT1159711600115991159311598  
CONECT1158911588  
CONECT1159111590  
CONECT1159211590  
CONECT1159411593  
CONECT1159611595  
CONECT1159811597  
CONECT1159911597  
CONECT1160011597  
CONECT115881159011589  
CONECT115951159311596  
CONECT1160311606116051160411601  
CONECT1160611610116031160711608  
CONECT1161011611116131160611612  
CONECT1160211601  
CONECT1160411603  
CONECT1160511603  
CONECT1160711606  
CONECT1160911608  
CONECT1161111610  
CONECT1161211610  
CONECT1161311610  
CONECT116011160311602  
CONECT116081160611609  
CONECT1161611619116171161411618  
CONECT1161911616116231162111620  
CONECT1162311619116251162411626  
CONECT1161511614  
CONECT1161711616  
CONECT1161811616  
CONECT1162011619  
CONECT1162211621  
CONECT1162411623  
CONECT1162511623  
CONECT1162611623  
CONECT116141161511616  
CONECT116211161911622  
CONECT1162911631116271163011632  
CONECT1163211636116291163411633  
CONECT1163611639116371163811632  
CONECT1162811627  
CONECT1163011629  
CONECT1163111629  
CONECT1163311632  
CONECT1163511634  
CONECT1163711636  
CONECT1163811636  
CONECT1163911636  
CONECT116271162811629  
CONECT116341163511632  
CONECT1164211640116431164411645  
CONECT1164511649116421164611647  
CONECT1164911650116451165111652  
CONECT1164111640  
CONECT1164311642  
CONECT1164411642

CONECT1164611645  
CONECT1164811647  
CONECT1165011649  
CONECT1165111649  
CONECT1165211649  
CONECT116401164111642  
CONECT116471164811645  
CONECT1165511657116531165611658  
CONECT1165811660116551165911662  
CONECT1166211665116631166411658  
CONECT1165411653  
CONECT1165611655  
CONECT1165711655  
CONECT1165911658  
CONECT1166111660  
CONECT1166311662  
CONECT1166411662  
CONECT1166511662  
CONECT116531165411655  
CONECT116601166111658  
CONECT1166811671116691167011666  
CONECT1167111668116721167311675  
CONECT1167511671116761167811677  
CONECT1166711666  
CONECT1166911668  
CONECT1167011668  
CONECT1167211671  
CONECT1167411673  
CONECT1167611675  
CONECT1167711675  
CONECT1167811675  
CONECT116661166811667  
CONECT116731167111674  
CONECT1168111683116791168211684  
CONECT1168411688116811168511686  
CONECT1168811690116841169111689  
CONECT1168011679  
CONECT1168211681  
CONECT1168311681  
CONECT1168511684  
CONECT1168711686  
CONECT1168911688  
CONECT1169011688  
CONECT1169111688  
CONECT116791168111680  
CONECT116861168411687  
CONECT1169411692116961169511697  
CONECT1169711698116991169411701  
CONECT1170111704117021170311697  
CONECT1169311692  
CONECT1169511694  
CONECT1169611694  
CONECT1169811697  
CONECT1170011699  
CONECT1170211701  
CONECT1170311701  
CONECT1170411701

CONNECT116921169411693  
CONNECT116991169711700  
CONNECT1170711705117091170811710  
CONNECT1171011711117141171211707  
CONNECT1171411716117171171011715  
CONNECT1170611705  
CONNECT1170811707  
CONNECT1170911707  
CONNECT1171111710  
CONNECT1171311712  
CONNECT1171511714  
CONNECT1171611714  
CONNECT1171711714  
CONNECT117051170611707  
CONNECT117121171311710  
CONNECT1172011721117181172211723  
CONNECT1172311724117251172011727  
CONNECT1172711728117291172311730  
CONNECT1171911718  
CONNECT1172111720  
CONNECT1172211720  
CONNECT1172411723  
CONNECT1172611725  
CONNECT1172811727  
CONNECT1172911727  
CONNECT1173011727  
CONNECT117181171911720  
CONNECT117251172311726  
CONNECT1173311731117361173411735  
CONNECT1173611733117381173711740  
CONNECT1174011741117431173611742  
CONNECT1173211731  
CONNECT1173411733  
CONNECT1173511733  
CONNECT1173711736  
CONNECT1173911738  
CONNECT1174111740  
CONNECT1174211740  
CONNECT1174311740  
CONNECT117311173211733  
CONNECT117381173611739  
CONNECT1174611748117491174711744  
CONNECT1174911753117511174611750  
CONNECT1175311754117491175511756  
CONNECT1174511744  
CONNECT1174711746  
CONNECT1174811746  
CONNECT1175011749  
CONNECT1175211751  
CONNECT1175411753  
CONNECT1175511753  
CONNECT1175611753  
CONNECT117441174511746  
CONNECT117511175211749  
CONNECT1175911757117621176111760  
CONNECT1176211759117641176311766  
CONNECT1176611762117671176911768

CONNECT1175811757  
CONNECT1176011759  
CONNECT1176111759  
CONNECT1176311762  
CONNECT1176511764  
CONNECT1176711766  
CONNECT1176811766  
CONNECT1176911766  
CONNECT117571175911758  
CONNECT117641176211765  
CONNECT1177211770117751177311774  
CONNECT1177511772117761177911777  
CONNECT1177911775117801178111782  
CONNECT1177111770  
CONNECT1177311772  
CONNECT1177411772  
CONNECT1177611775  
CONNECT1177811777  
CONNECT1178011779  
CONNECT1178111779  
CONNECT1178211779  
CONNECT117701177111772  
CONNECT117771177511778  
CONNECT1178511788117871178311786  
CONNECT1178811789117921178511790  
CONNECT1179211788117951179311794  
CONNECT1178411783  
CONNECT1178611785  
CONNECT1178711785  
CONNECT1178911788  
CONNECT1179111790  
CONNECT1179311792  
CONNECT1179411792  
CONNECT1179511792  
CONNECT117831178411785  
CONNECT117901178811791  
CONNECT1179811799117961180011801  
CONNECT1180111802118031179811805  
CONNECT1180511807118061180811801  
CONNECT1179711796  
CONNECT1179911798  
CONNECT1180011798  
CONNECT1180211801  
CONNECT1180411803  
CONNECT1180611805  
CONNECT1180711805  
CONNECT1180811805  
CONNECT117961179811797  
CONNECT118031180411801  
CONNECT1181111813118091181211814  
CONNECT1181411811118161181511818  
CONNECT1181811819118201181411821  
CONNECT1181011809  
CONNECT1181211811  
CONNECT1181311811  
CONNECT1181511814  
CONNECT1181711816

CONECT1181911818  
CONECT1182011818  
CONECT1182111818  
CONECT11809118111810  
CONECT118161181711814  
CONECT1182411827118251182611822  
CONECT1182711824118281183111829  
CONECT1183111827118341183211833  
CONECT1182311822  
CONECT1182511824  
CONECT1182611824  
CONECT1182811827  
CONECT1183011829  
CONECT1183211831  
CONECT1183311831  
CONECT1183411831  
CONECT118221182411823  
CONECT118291182711830  
CONECT1183711839118351183811840  
CONECT1184011841118441183711842  
CONECT1184411845118471184011846  
CONECT1183611835  
CONECT1183811837  
CONECT1183911837  
CONECT1184111840  
CONECT1184311842  
CONECT1184511844  
CONECT1184611844  
CONECT1184711844  
CONECT118351183611837  
CONECT118421184011843  
CONECT1185011851118481185211853  
CONECT1185311850118541185511857  
CONECT1185711858118601185311859  
CONECT1184911848  
CONECT1185111850  
CONECT1185211850  
CONECT1185411853  
CONECT1185611855  
CONECT1185811857  
CONECT1185911857  
CONECT1186011857  
CONECT118481185011849  
CONECT118551185611853  
CONECT1186311866118611186411865  
CONECT1186611863118671187011868  
CONECT1187011866118731187211871  
CONECT1186211861  
CONECT1186411863  
CONECT1186511863  
CONECT1186711866  
CONECT1186911868  
CONECT1187111870  
CONECT1187211870  
CONECT1187311870  
CONECT118611186311862  
CONECT118681186611869

CONECT1187611877118741187811879  
CONECT1187911881118761188011883  
CONECT1188311886118791188511884  
CONECT1187511874  
CONECT1187711876  
CONECT1187811876  
CONECT1188011879  
CONECT1188211881  
CONECT1188411883  
CONECT1188511883  
CONECT1188611883  
CONECT118741187611875  
CONECT118811188211879  
CONECT1188911890118921188711891  
CONECT1189211896118931189411889  
CONECT1189611892118981189711899  
CONECT1188811887  
CONECT1189011889  
CONECT1189111889  
CONECT1189311892  
CONECT1189511894  
CONECT1189711896  
CONECT1189811896  
CONECT1189911896  
CONECT118871188811889  
CONECT118941189211895  
CONECT1190211903119051190011904  
CONECT1190511902119061190911907  
CONECT1190911911119121190511910  
CONECT1190111900  
CONECT1190311902  
CONECT1190411902  
CONECT1190611905  
CONECT1190811907  
CONECT1191011909  
CONECT1191111909  
CONECT1191211909  
CONECT119001190211901  
CONECT119071190811905  
CONECT1191511918119131191611917  
CONECT1191811915119191192011922  
CONECT1192211923119181192511924  
CONECT1191411913  
CONECT1191611915  
CONECT1191711915  
CONECT1191911918  
CONECT1192111920  
CONECT1192311922  
CONECT1192411922  
CONECT1192511922  
CONECT119131191511914  
CONECT119201191811921  
CONECT1192811931119301192911926  
CONECT1193111928119331193511932  
CONECT1193511931119381193711936  
CONECT1192711926  
CONECT1192911928

CONECT1193011928  
CONECT1193211931  
CONECT1193411933  
CONECT1193611935  
CONECT1193711935  
CONECT1193811935  
CONECT119261192811927  
CONECT119331193111934  
CONECT1194111943119441193911942  
CONECT1194411946119451194111948  
CONECT1194811944119511195011949  
CONECT1194011939  
CONECT1194211941  
CONECT1194311941  
CONECT1194511944  
CONECT1194711946  
CONECT1194911948  
CONECT1195011948  
CONECT1195111948  
CONECT119391194011941  
CONECT119461194411947  
CONECT1195411955119561195711952  
CONECT1195711958119611195911954  
CONECT1196111962119631195711964  
CONECT1195311952  
CONECT1195511954  
CONECT1195611954  
CONECT1195811957  
CONECT1196011959  
CONECT1196211961  
CONECT1196311961  
CONECT1196411961  
CONECT119521195311954  
CONECT119591196011957  
CONECT1196711965119701196911968  
CONECT1197011967119721197111974  
CONECT1197411970119761197711975  
CONECT1196611965  
CONECT1196811967  
CONECT1196911967  
CONECT1197111970  
CONECT1197311972  
CONECT1197511974  
CONECT1197611974  
CONECT1197711974  
CONECT119651196711966  
CONECT119721197011973  
CONECT1198011981119781198211983  
CONECT1198311984119871198011985  
CONECT1198711988119891198311990  
CONECT1197911978  
CONECT1198111980  
CONECT1198211980  
CONECT1198411983  
CONECT1198611985  
CONECT1198811987  
CONECT1198911987



CONECT1199011987  
CONECT119781197911980  
CONECT119851198611983  
CONECT1199311991119961199511994  
CONECT1199611993119971199812000  
CONECT1200012002119961200312001  
CONECT1199211991  
CONECT1199411993  
CONECT1199511993  
CONECT1199711996  
CONECT1199911998  
CONECT1200112000  
CONECT1200212000  
CONECT1200312000  
CONECT119911199311992  
CONECT119981199611999  
CONECT1200612009120041200712008  
CONECT1200912010120111200612013  
CONECT1201312009120141201512016  
CONECT1200512004  
CONECT1200712006  
CONECT1200812006  
CONECT1201012009  
CONECT1201212011  
CONECT1201412013  
CONECT1201512013  
CONECT1201612013  
CONECT120041200512006  
CONECT120111200912012  
CONECT1201912017120201202212021  
CONECT1202212019120241202612023  
CONECT1202612027120221202812029  
CONECT1201812017  
CONECT1202012019  
CONECT1202112019  
CONECT1202312022  
CONECT1202512024  
CONECT1202712026  
CONECT1202812026  
CONECT1202912026  
CONECT120171201812019  
CONECT120241202212025  
CONECT1203212030120331203412035  
CONECT1203512036120391203212037  
CONECT1203912042120351204012041  
CONECT1203112030  
CONECT1203312032  
CONECT1203412032  
CONECT1203612035  
CONECT1203812037  
CONECT1204012039  
CONECT1204112039  
CONECT1204212039  
CONECT120301203112032  
CONECT120371203812035  
CONECT1204512047120431204612048  
CONECT1204812045120501204912052

CONNECT1205212055120481205412053  
CONNECT1204412043  
CONNECT1204612045  
CONNECT1204712045  
CONNECT1204912048  
CONNECT1205112050  
CONNECT1205312052  
CONNECT1205412052  
CONNECT1205512052  
CONNECT120431204512044  
CONNECT120501204812051  
CONNECT1205812059120561206012061  
CONNECT1206112058120621206312065  
CONNECT1206512067120661206812061  
CONNECT1205712056  
CONNECT1205912058  
CONNECT1206012058  
CONNECT1206212061  
CONNECT1206412063  
CONNECT1206612065  
CONNECT1206712065  
CONNECT1206812065  
CONNECT120561205812057  
CONNECT120631206412061  
CONNECT1207112074120691207312072  
CONNECT1207412071120751207812076  
CONNECT1207812074120811208012079  
CONNECT1207012069  
CONNECT1207212071  
CONNECT1207312071  
CONNECT1207512074  
CONNECT1207712076  
CONNECT1207912078  
CONNECT1208012078  
CONNECT1208112078  
CONNECT120691207112070  
CONNECT120761207412077  
CONNECT1208412085120821208612087  
CONNECT1208712088120911208912084  
CONNECT1209112093120941208712092  
CONNECT1208312082  
CONNECT1208512084  
CONNECT1208612084  
CONNECT1208812087  
CONNECT1209012089  
CONNECT1209212091  
CONNECT1209312091  
CONNECT1209412091  
CONNECT120821208312084  
CONNECT120891209012087  
CONNECT1209712095121001209812099  
CONNECT1210012102121011210412097  
CONNECT1210412100121061210712105  
CONNECT1209612095  
CONNECT1209812097  
CONNECT1209912097  
CONNECT1210112100

CONECT1210312102  
CONECT1210512104  
CONECT1210612104  
CONECT1210712104  
CONECT120951209612097  
CONECT121021210012103  
CONECT1211012112121081211312111  
CONECT1211312117121141211512110  
CONECT1211712119121131211812120  
CONECT1210912108  
CONECT1211112110  
CONECT1211212110  
CONECT1211412113  
CONECT1211612115  
CONECT1211812117  
CONECT1211912117  
CONECT1212012117  
CONECT121081210912110  
CONECT121151211312116  
CONECT1212312121121251212412126  
CONECT1212612123121281212712130  
CONECT1213012133121321213112126  
CONECT1212212121  
CONECT1212412123  
CONECT1212512123  
CONECT1212712126  
CONECT1212912128  
CONECT1213112130  
CONECT1213212130  
CONECT1213312130  
CONECT121211212212123  
CONECT121281212912126  
CONECT1213612139121371213812134  
CONECT1213912143121411214012136  
CONECT1214312139121461214412145  
CONECT1213512134  
CONECT1213712136  
CONECT1213812136  
CONECT1214012139  
CONECT1214212141  
CONECT1214412143  
CONECT1214512143  
CONECT1214612143  
CONECT121341213512136  
CONECT121411213912142  
CONECT1214912151121471215212150  
CONECT1215212156121531214912154  
CONECT1215612157121591215212158  
CONECT1214812147  
CONECT1215012149  
CONECT1215112149  
CONECT1215312152  
CONECT1215512154  
CONECT1215712156  
CONECT1215812156  
CONECT1215912156  
CONECT121471214812149

CONECT121541215512152  
CONECT1216212160121631216412165  
CONECT1216512166121691216212167  
CONECT1216912171121701216512172  
CONECT1216112160  
CONECT1216312162  
CONECT1216412162  
CONECT1216612165  
CONECT1216812167  
CONECT1217012169  
CONECT1217112169  
CONECT1217212169  
CONECT121601216112162  
CONECT121671216512168  
CONECT1217512176121771217312178  
CONECT1217812182121791217512180  
CONECT1218212185121841217812183  
CONECT1217412173  
CONECT1217612175  
CONECT1217712175  
CONECT1217912178  
CONECT1218112180  
CONECT1218312182  
CONECT1218412182  
CONECT1218512182  
CONECT121731217512174  
CONECT121801218112178  
CONECT1218812189121901218612191  
CONECT1219112195121881219212193  
CONECT1219512196121981219112197  
CONECT1218712186  
CONECT1218912188  
CONECT1219012188  
CONECT1219212191  
CONECT1219412193  
CONECT1219612195  
CONECT1219712195  
CONECT1219812195  
CONECT121861218812187  
CONECT121931219112194  
CONECT1220112199122031220212204  
CONECT1220412205122011220612208  
CONECT1220812209122111221012204  
CONECT1220012199  
CONECT1220212201  
CONECT1220312201  
CONECT1220512204  
CONECT1220712206  
CONECT1220912208  
CONECT1221012208  
CONECT1221112208  
CONECT121991220112200  
CONECT122061220712204  
CONECT1221412216122121221512217  
CONECT1221712221122141221912218  
CONECT1222112223122221222412217  
CONECT1221312212

CONNECT1221512214  
CONNECT1221612214  
CONNECT1221812217  
CONNECT1222012219  
CONNECT1222212221  
CONNECT1222312221  
CONNECT1222412221  
CONNECT122121221312214  
CONNECT122191222012217  
CONNECT1222712230122291222812225  
CONNECT1223012234122271223212231  
CONNECT1223412230122371223512236  
CONNECT1222612225  
CONNECT1222812227  
CONNECT1222912227  
CONNECT1223112230  
CONNECT1223312232  
CONNECT1223512234  
CONNECT1223612234  
CONNECT1223712234  
CONNECT122251222712226  
CONNECT122321223012233  
CONNECT1224012242122431223812241  
CONNECT1224312245122471224012244  
CONNECT1224712250122431224912248  
CONNECT1223912238  
CONNECT1224112240  
CONNECT1224212240  
CONNECT1224412243  
CONNECT1224612245  
CONNECT1224812247  
CONNECT1224912247  
CONNECT1225012247  
CONNECT122381223912240  
CONNECT122451224312246  
CONNECT1225312256122511225412255  
CONNECT1225612253122571226012258  
CONNECT1226012256122611226212263  
CONNECT1225212251  
CONNECT1225412253  
CONNECT1225512253  
CONNECT1225712256  
CONNECT1225912258  
CONNECT1226112260  
CONNECT1226212260  
CONNECT1226312260  
CONNECT122511225312252  
CONNECT122581225612259  
CONNECT1226612269122671226812264  
CONNECT1226912266122731227112270  
CONNECT1227312276122741226912275  
CONNECT1226512264  
CONNECT1226712266  
CONNECT1226812266  
CONNECT1227012269  
CONNECT1227212271  
CONNECT1227412273

CONECT1227512273  
CONECT1227612273  
CONECT122641226612265  
CONECT122711227212269  
CONECT1227912277122801228212281  
CONECT1228212283122841228612279  
CONECT1228612289122881228212287  
CONECT1227812277  
CONECT1228012279  
CONECT1228112279  
CONECT1228312282  
CONECT1228512284  
CONECT1228712286  
CONECT1228812286  
CONECT1228912286  
CONECT122771227812279  
CONECT122841228512282  
CONECT1229212295122941229012293  
CONECT1229512292122971229912296  
CONECT1229912301122951230212300  
CONECT1229112290  
CONECT1229312292  
CONECT1229412292  
CONECT1229612295  
CONECT1229812297  
CONECT1230012299  
CONECT1230112299  
CONECT1230212299  
CONECT122901229212291  
CONECT122971229512298  
CONECT1230512306123031230812307  
CONECT1230812305123091231212310  
CONECT1231212314123081231512313  
CONECT1230412303  
CONECT1230612305  
CONECT1230712305  
CONECT1230912308  
CONECT1231112310  
CONECT1231312312  
CONECT1231412312  
CONECT1231512312  
CONECT123031230512304  
CONECT123101231112308  
CONECT1231812316123191232112320  
CONECT1232112323123181232512322  
CONECT1232512328123211232612327  
CONECT1231712316  
CONECT1231912318  
CONECT1232012318  
CONECT1232212321  
CONECT1232412323  
CONECT1232612325  
CONECT1232712325  
CONECT1232812325  
CONECT123161231712318  
CONECT123231232112324  
CONECT1233112332123331233412329

CONNECT1233412331123351233612338  
CONNECT1233812341123391233412340  
CONNECT1233012329  
CONNECT1233212331  
CONNECT1233312331  
CONNECT1233512334  
CONNECT1233712336  
CONNECT1233912338  
CONNECT1234012338  
CONNECT1234112338  
CONNECT123291233112330  
CONNECT123361233412337  
CONNECT1234412342123461234712345  
CONNECT1234712349123441235112348  
CONNECT1235112353123471235212354  
CONNECT1234312342  
CONNECT1234512344  
CONNECT1234612344  
CONNECT1234812347  
CONNECT1235012349  
CONNECT1235212351  
CONNECT1235312351  
CONNECT1235412351  
CONNECT123421234312344  
CONNECT123491234712350  
CONNECT1235712360123551235912358  
CONNECT1236012364123611235712362  
CONNECT1236412366123601236512367  
CONNECT1235612355  
CONNECT1235812357  
CONNECT1235912357  
CONNECT1236112360  
CONNECT1236312362  
CONNECT1236512364  
CONNECT1236612364  
CONNECT1236712364  
CONNECT123551235612357  
CONNECT123621236012363  
CONNECT1237012373123711236812372  
CONNECT1237312377123701237412375  
CONNECT1237712380123731237812379  
CONNECT1236912368  
CONNECT1237112370  
CONNECT1237212370  
CONNECT1237412373  
CONNECT1237612375  
CONNECT1237812377  
CONNECT1237912377  
CONNECT1238012377  
CONNECT123681236912370  
CONNECT123751237312376  
CONNECT1238312385123861238112384  
CONNECT1238612390123871238312388  
CONNECT1239012393123861239112392  
CONNECT1238212381  
CONNECT1238412383  
CONNECT1238512383

CONNECT1238712386  
CONNECT1238912388  
CONNECT1239112390  
CONNECT1239212390  
CONNECT1239312390  
CONNECT123811238212383  
CONNECT123881238912386  
CONNECT1239612397123981239412399  
CONNECT1239912400124031239612401  
CONNECT1240312405123991240612404  
CONNECT1239512394  
CONNECT1239712396  
CONNECT1239812396  
CONNECT1240012399  
CONNECT1240212401  
CONNECT1240412403  
CONNECT1240512403  
CONNECT1240612403  
CONNECT123941239512396  
CONNECT124011240212399  
CONNECT1240912407124101241212411  
CONNECT1241212413124141240912416  
CONNECT1241612417124181241912412  
CONNECT1240812407  
CONNECT1241012409  
CONNECT1241112409  
CONNECT1241312412  
CONNECT1241512414  
CONNECT1241712416  
CONNECT1241812416  
CONNECT1241912416  
CONNECT124071240812409  
CONNECT124141241512412  
CONNECT1242212420124241242512423  
CONNECT1242512429124261242212427  
CONNECT1242912425124301243212431  
CONNECT1242112420  
CONNECT1242312422  
CONNECT1242412422  
CONNECT1242612425  
CONNECT1242812427  
CONNECT1243012429  
CONNECT1243112429  
CONNECT1243212429  
CONNECT124201242112422  
CONNECT124271242512428  
CONNECT1243512438124331243612437  
CONNECT1243812439124421243512440  
CONNECT1244212438124431244412445  
CONNECT1243412433  
CONNECT1243612435  
CONNECT1243712435  
CONNECT1243912438  
CONNECT1244112440  
CONNECT1244312442  
CONNECT1244412442  
CONNECT1244512442



CONNECT124331243512434  
CONNECT124401244112438  
CONNECT1244812450124461245112449  
CONNECT1245112452124551244812453  
CONNECT1245512451124571245812456  
CONNECT1244712446  
CONNECT1244912448  
CONNECT1245012448  
CONNECT1245212451  
CONNECT1245412453  
CONNECT1245612455  
CONNECT1245712455  
CONNECT1245812455  
CONNECT124461244712448  
CONNECT124531245412451  
CONNECT1246112464124621245912463  
CONNECT1246412461124651246612468  
CONNECT1246812469124711246412470  
CONNECT1246012459  
CONNECT1246212461  
CONNECT1246312461  
CONNECT1246512464  
CONNECT1246712466  
CONNECT1246912468  
CONNECT1247012468  
CONNECT1247112468  
CONNECT124591246112460  
CONNECT124661246712464  
CONNECT1247412475124721247612477  
CONNECT1247712479124741247812481  
CONNECT1248112484124821248312477  
CONNECT1247312472  
CONNECT1247512474  
CONNECT1247612474  
CONNECT1247812477  
CONNECT1248012479  
CONNECT1248212481  
CONNECT1248312481  
CONNECT1248412481  
CONNECT124721247412473  
CONNECT124791248012477  
CONNECT1248712489124881248512490  
CONNECT1249012491124871249212494  
CONNECT1249412495124961249712490  
CONNECT1248612485  
CONNECT1248812487  
CONNECT1248912487  
CONNECT1249112490  
CONNECT1249312492  
CONNECT1249512494  
CONNECT1249612494  
CONNECT1249712494  
CONNECT124851248712486  
CONNECT124921249312490  
CONNECT1250012501125021249812503  
CONNECT1250312507125001250412505  
CONNECT1250712503125081251012509

CONNECT1249912498  
CONNECT1250112500  
CONNECT1250212500  
CONNECT1250412503  
CONNECT1250612505  
CONNECT1250812507  
CONNECT1250912507  
CONNECT1251012507  
CONNECT124981250012499  
CONNECT125051250312506  
CONNECT1251312516125111251412515  
CONNECT1251612513125171251812520  
CONNECT1252012516125211252212523  
CONNECT1251212511  
CONNECT1251412513  
CONNECT1251512513  
CONNECT1251712516  
CONNECT1251912518  
CONNECT1252112520  
CONNECT1252212520  
CONNECT1252312520  
CONNECT125111251312512  
CONNECT125181251612519  
CONNECT1252612528125241252912527  
CONNECT1252912530125331253112526  
CONNECT1253312535125361252912534  
CONNECT1252512524  
CONNECT1252712526  
CONNECT1252812526  
CONNECT1253012529  
CONNECT1253212531  
CONNECT1253412533  
CONNECT1253512533  
CONNECT1253612533  
CONNECT125241252512526  
CONNECT125311253212529  
CONNECT1253912542125371254012541  
CONNECT1254212546125431254412539  
CONNECT1254612542125471254812549  
CONNECT1253812537  
CONNECT1254012539  
CONNECT1254112539  
CONNECT1254312542  
CONNECT1254512544  
CONNECT1254712546  
CONNECT1254812546  
CONNECT1254912546  
CONNECT125371253812539  
CONNECT125441254212545  
CONNECT1255212554125501255312555  
CONNECT1255512556125521255712559  
CONNECT1255912561125551256012562  
CONNECT1255112550  
CONNECT1255312552  
CONNECT1255412552  
CONNECT1255612555  
CONNECT1255812557

CONNECT1256012559  
CONNECT1256112559  
CONNECT1256212559  
CONNECT125501255212551  
CONNECT125571255812555  
CONNECT1256512563125661256812567  
CONNECT1256812569125721257012565  
CONNECT1257212575125741256812573  
CONNECT1256412563  
CONNECT1256612565  
CONNECT1256712565  
CONNECT1256912568  
CONNECT1257112570  
CONNECT1257312572  
CONNECT1257412572  
CONNECT1257512572  
CONNECT125631256412565  
CONNECT125701256812571  
CONNECT1257812581125761258012579  
CONNECT1258112583125851257812582  
CONNECT1258512587125811258612588  
CONNECT1257712576  
CONNECT1257912578  
CONNECT1258012578  
CONNECT1258212581  
CONNECT1258412583  
CONNECT1258612585  
CONNECT1258712585  
CONNECT1258812585  
CONNECT125761257712578  
CONNECT125831258112584  
CONNECT1259112589125941259312592  
CONNECT1259412595125911259812596  
CONNECT1259812601125941260012599  
CONNECT1259012589  
CONNECT1259212591  
CONNECT1259312591  
CONNECT1259512594  
CONNECT1259712596  
CONNECT1259912598  
CONNECT1260012598  
CONNECT1260112598  
CONNECT125891259012591  
CONNECT125961259412597  
CONNECT1260412602126071260612605  
CONNECT1260712609126111260812604  
CONNECT1261112612126071261412613  
CONNECT1260312602  
CONNECT1260512604  
CONNECT1260612604  
CONNECT1260812607  
CONNECT1261012609  
CONNECT1261212611  
CONNECT1261312611  
CONNECT1261412611  
CONNECT126021260312604  
CONNECT126091260712610

CONECT1261712615126191261812620  
CONECT1262012624126171262212621  
CONECT1262412625126271262612620  
CONECT1261612615  
CONECT1261812617  
CONECT1261912617  
CONECT1262112620  
CONECT1262312622  
CONECT1262512624  
CONECT1262612624  
CONECT1262712624  
CONECT126151261712616  
CONECT126221262312620  
CONECT1263012632126311262812633  
CONECT1263312635126371263012634  
CONECT1263712640126391263812633  
CONECT1262912628  
CONECT1263112630  
CONECT1263212630  
CONECT1263412633  
CONECT1263612635  
CONECT1263812637  
CONECT1263912637  
CONECT1264012637  
CONECT126281263012629  
CONECT126351263312636  
CONECT1264312641126461264512644  
CONECT1264612647126501264812643  
CONECT1265012651126461265212653  
CONECT1264212641  
CONECT1264412643  
CONECT1264512643  
CONECT1264712646  
CONECT1264912648  
CONECT1265112650  
CONECT1265212650  
CONECT1265312650  
CONECT126411264212643  
CONECT126481264912646  
CONECT1265612657126591265412658  
CONECT1265912663126601265612661  
CONECT1266312659126651266412666  
CONECT1265512654  
CONECT1265712656  
CONECT1265812656  
CONECT1266012659  
CONECT1266212661  
CONECT1266412663  
CONECT1266512663  
CONECT1266612663  
CONECT126541265512656  
CONECT126611266212659  
CONECT1266912672126671267012671  
CONECT1267212676126691267412673  
CONECT1267612672126791267812677  
CONECT1266812667  
CONECT1267012669

CONNECT1267112669  
CONNECT1267312672  
CONNECT1267512674  
CONNECT1267712676  
CONNECT1267812676  
CONNECT1267912676  
CONNECT126671266812669  
CONNECT126741267212675  
CONNECT1268212683126851268412680  
CONNECT1268512687126891268212686  
CONNECT1268912690126851269212691  
CONNECT1268112680  
CONNECT1268312682  
CONNECT1268412682  
CONNECT1268612685  
CONNECT1268812687  
CONNECT1269012689  
CONNECT1269112689  
CONNECT1269212689  
CONNECT126801268112682  
CONNECT126871268512688  
CONNECT1269512693126961269812697  
CONNECT1269812700127021269512699  
CONNECT1270212705127041269812703  
CONNECT1269412693  
CONNECT1269612695  
CONNECT1269712695  
CONNECT1269912698  
CONNECT1270112700  
CONNECT1270312702  
CONNECT1270412702  
CONNECT1270512702  
CONNECT126931269512694  
CONNECT127001269812701  
CONNECT1270812711127061270912710  
CONNECT1271112715127081271212713  
CONNECT1271512711127171271612718  
CONNECT1270712706  
CONNECT1270912708  
CONNECT1271012708  
CONNECT1271212711  
CONNECT1271412713  
CONNECT1271612715  
CONNECT1271712715  
CONNECT1271812715  
CONNECT127061270712708  
CONNECT127131271112714  
CONNECT1272112719127221272412723  
CONNECT1272412725127281272612721  
CONNECT1272812731127241273012729  
CONNECT1272012719  
CONNECT1272212721  
CONNECT1272312721  
CONNECT1272512724  
CONNECT1272712726  
CONNECT1272912728  
CONNECT1273012728

CONECT1273112728  
CONECT127191272112720  
CONECT127261272412727  
CONECT1273412735127361273712732  
CONECT1273712741127341273912738  
CONECT1274112737127421274412743  
CONECT1273312732  
CONECT1273512734  
CONECT1273612734  
CONECT1273812737  
CONECT1274012739  
CONECT1274212741  
CONECT1274312741  
CONECT1274412741  
CONECT127321273312734  
CONECT127391274012737  
CONECT1274712750127491274812745  
CONECT1275012747127541275112752  
CONECT1275412750127551275712756  
CONECT1274612745  
CONECT1274812747  
CONECT1274912747  
CONECT1275112750  
CONECT1275312752  
CONECT1275512754  
CONECT1275612754  
CONECT1275712754  
CONECT127451274712746  
CONECT127521275012753  
CONECT1276012763127581276212761  
CONECT1276312760127651276412767  
CONECT1276712763127701276812769  
CONECT1275912758  
CONECT1276112760  
CONECT1276212760  
CONECT1276412763  
CONECT1276612765  
CONECT1276812767  
CONECT1276912767  
CONECT1277012767  
CONECT127581275912760  
CONECT127651276312766  
CONECT1277312774127711277612775  
CONECT1277612773127781277712780  
CONECT1278012782127811277612783  
CONECT1277212771  
CONECT1277412773  
CONECT1277512773  
CONECT1277712776  
CONECT1277912778  
CONECT1278112780  
CONECT1278212780  
CONECT1278312780  
CONECT127711277312772  
CONECT127781277912776  
CONECT1278612784127871278812789  
CONECT1278912790127931278612791

CONECT1279312795127961278912794  
CONECT1278512784  
CONECT1278712786  
CONECT1278812786  
CONECT1279012789  
CONECT1279212791  
CONECT1279412793  
CONECT1279512793  
CONECT1279612793  
CONECT127841278612785  
CONECT127911279212789  
CONECT1279912801127971280012802  
CONECT1280212804128031280612799  
CONECT1280612808128071280912802  
CONECT1279812797  
CONECT1280012799  
CONECT1280112799  
CONECT1280312802  
CONECT1280512804  
CONECT1280712806  
CONECT1280812806  
CONECT1280912806  
CONECT127971279812799  
CONECT128041280512802  
CONECT1281212810128141281512813  
CONECT1281512817128161281912812  
CONECT1281912822128211282012815  
CONECT1281112810  
CONECT1281312812  
CONECT1281412812  
CONECT1281612815  
CONECT1281812817  
CONECT1282012819  
CONECT1282112819  
CONECT1282212819  
CONECT128101281112812  
CONECT128171281812815  
CONECT1282512827128231282612828  
CONECT1282812830128291283212825  
CONECT1283212833128281283512834  
CONECT1282412823  
CONECT1282612825  
CONECT1282712825  
CONECT1282912828  
CONECT1283112830  
CONECT1283312832  
CONECT1283412832  
CONECT1283512832  
CONECT128231282412825  
CONECT128301282812831  
CONECT1283812836128401283912841  
CONECT1284112842128381284312845  
CONECT1284512846128481284712841  
CONECT1283712836  
CONECT1283912838  
CONECT1284012838  
CONECT1284212841

CONNECT1284412843  
CONNECT1284612845  
CONNECT1284712845  
CONNECT1284812845  
CONNECT128361283812837  
CONNECT128431284412841  
CONNECT1285112853128541284912852  
CONNECT1285412858128511285612855  
CONNECT1285812854128611286012859  
CONNECT1285012849  
CONNECT1285212851  
CONNECT1285312851  
CONNECT1285512854  
CONNECT1285712856  
CONNECT1285912858  
CONNECT1286012858  
CONNECT1286112858  
CONNECT128491285112850  
CONNECT128561285412857  
CONNECT1286412862128661286712865  
CONNECT1286712871128681286412869  
CONNECT1287112873128741286712872  
CONNECT1286312862  
CONNECT1286512864  
CONNECT1286612864  
CONNECT1286812867  
CONNECT1287012869  
CONNECT1287212871  
CONNECT1287312871  
CONNECT1287412871  
CONNECT128621286412863  
CONNECT128691286712870  
CONNECT1287712880128781287512879  
CONNECT1288012877128811288412882  
CONNECT1288412887128801288612885  
CONNECT1287612875  
CONNECT1287812877  
CONNECT1287912877  
CONNECT1288112880  
CONNECT1288312882  
CONNECT1288512884  
CONNECT1288612884  
CONNECT1288712884  
CONNECT128751287612877  
CONNECT128821288312880  
CONNECT1289012891128881289212893  
CONNECT1289312890128941289512897  
CONNECT1289712898129001289912893  
CONNECT1288912888  
CONNECT1289112890  
CONNECT1289212890  
CONNECT1289412893  
CONNECT1289612895  
CONNECT1289812897  
CONNECT1289912897  
CONNECT1290012897  
CONNECT128881289012889



CONNECT128951289612893  
CONNECT1290312901129051290612904  
CONNECT1290612903129071291012908  
CONNECT1291012913129111291212906  
CONNECT1290212901  
CONNECT1290412903  
CONNECT1290512903  
CONNECT1290712906  
CONNECT1290912908  
CONNECT1291112910  
CONNECT1291212910  
CONNECT1291312910  
CONNECT129011290312902  
CONNECT129081290912906  
CONNECT1291612914129191291712918  
CONNECT1291912916129201292112923  
CONNECT1292312919129241292612925  
CONNECT1291512914  
CONNECT1291712916  
CONNECT1291812916  
CONNECT1292012919  
CONNECT1292212921  
CONNECT1292412923  
CONNECT1292512923  
CONNECT1292612923  
CONNECT129141291512916  
CONNECT129211291912922  
CONNECT1292912927129321293012931  
CONNECT1293212934129291293312936  
CONNECT1293612932129391293812937  
CONNECT1292812927  
CONNECT1293012929  
CONNECT1293112929  
CONNECT1293312932  
CONNECT1293512934  
CONNECT1293712936  
CONNECT1293812936  
CONNECT1293912936  
CONNECT129271292912928  
CONNECT129341293212935  
CONNECT1294212944129451294012943  
CONNECT1294512942129491294612947  
CONNECT1294912945129521295112950  
CONNECT1294112940  
CONNECT1294312942  
CONNECT1294412942  
CONNECT1294612945  
CONNECT1294812947  
CONNECT1295012949  
CONNECT1295112949  
CONNECT1295212949  
CONNECT129401294212941  
CONNECT129471294512948  
CONNECT1295512957129561295312958  
CONNECT1295812960129621295512959  
CONNECT1296212964129651296312958  
CONNECT1295412953

CONNECT1295612955  
CONNECT1295712955  
CONNECT1295912958  
CONNECT1296112960  
CONNECT1296312962  
CONNECT1296412962  
CONNECT1296512962  
CONNECT129531295412955  
CONNECT129601295812961  
CONNECT1296812969129711296612970  
CONNECT1297112968129721297512973  
CONNECT1297512971129761297812977  
CONNECT1296712966  
CONNECT1296912968  
CONNECT1297012968  
CONNECT1297212971  
CONNECT1297412973  
CONNECT1297612975  
CONNECT1297712975  
CONNECT1297812975  
CONNECT129661296812967  
CONNECT129731297412971  
CONNECT1298112983129841298212979  
CONNECT1298412986129811298512988  
CONNECT1298812989129911299012984  
CONNECT1298012979  
CONNECT1298212981  
CONNECT1298312981  
CONNECT1298512984  
CONNECT1298712986  
CONNECT1298912988  
CONNECT1299012988  
CONNECT1299112988  
CONNECT129791298112980  
CONNECT129861298712984  
CONNECT1299412995129921299612997  
CONNECT1299712999129941300112998  
CONNECT1300113002130031299713004  
CONNECT1299312992  
CONNECT1299512994  
CONNECT1299612994  
CONNECT1299812997  
CONNECT1300012999  
CONNECT1300213001  
CONNECT1300313001  
CONNECT1300413001  
CONNECT129921299312994  
CONNECT129991299713000  
CONNECT1300713008130051300913010  
CONNECT1301013011130141301213007  
CONNECT1301413016130151301713010  
CONNECT1300613005  
CONNECT1300813007  
CONNECT1300913007  
CONNECT1301113010  
CONNECT1301313012  
CONNECT1301513014

CONNECT1301613014  
CONNECT1301713014  
CONNECT130051300613007  
CONNECT130121301313010  
CONNECT1302013018130221302313021  
CONNECT1302313025130201302413027  
CONNECT1302713023130291302813030  
CONNECT1301913018  
CONNECT1302113020  
CONNECT1302213020  
CONNECT1302413023  
CONNECT1302613025  
CONNECT1302813027  
CONNECT1302913027  
CONNECT1303013027  
CONNECT130181302013019  
CONNECT130251302313026  
CONNECT1303313034130311303613035  
CONNECT1303613040130331303713038  
CONNECT1304013043130361304213041  
CONNECT1303213031  
CONNECT1303413033  
CONNECT1303513033  
CONNECT1303713036  
CONNECT1303913038  
CONNECT1304113040  
CONNECT1304213040  
CONNECT1304313040  
CONNECT130311303313032  
CONNECT130381303913036  
CONNECT1304613047130441304913048  
CONNECT1304913046130501305113053  
CONNECT1305313049130561305413055  
CONNECT1304513044  
CONNECT1304713046  
CONNECT1304813046  
CONNECT1305013049  
CONNECT1305213051  
CONNECT1305413053  
CONNECT1305513053  
CONNECT1305613053  
CONNECT130441304613045  
CONNECT130511305213049  
CONNECT1305913057130621306113060  
CONNECT1306213066130591306413063  
CONNECT1306613062130691306813067  
CONNECT1305813057  
CONNECT1306013059  
CONNECT1306113059  
CONNECT1306313062  
CONNECT1306513064  
CONNECT1306713066  
CONNECT1306813066  
CONNECT1306913066  
CONNECT130571305913058  
CONNECT130641306213065  
CONNECT1307213075130731307413070

CONECT1307513079130771307213076  
CONECT1307913075130811308213080  
CONECT1307113070  
CONECT1307313072  
CONECT1307413072  
CONECT1307613075  
CONECT1307813077  
CONECT1308013079  
CONECT1308113079  
CONECT1308213079  
CONECT130701307113072  
CONECT130771307813075  
CONECT1308513086130831308813087  
CONECT1308813085130901309213089  
CONECT1309213095130941308813093  
CONECT1308413083  
CONECT1308613085  
CONECT1308713085  
CONECT1308913088  
CONECT1309113090  
CONECT1309313092  
CONECT1309413092  
CONECT1309513092  
CONECT130831308513084  
CONECT130901308813091  
CONECT1309813101130991310013096  
CONECT1310113098131051310313102  
CONECT1310513101131061310813107  
CONECT1309713096  
CONECT1309913098  
CONECT1310013098  
CONECT1310213101  
CONECT1310413103  
CONECT1310613105  
CONECT1310713105  
CONECT1310813105  
CONECT130961309713098  
CONECT131031310113104  
CONECT1311113114131091311313112  
CONECT1311413116131151311813111  
CONECT1311813119131211311413120  
CONECT1311013109  
CONECT1311213111  
CONECT1311313111  
CONECT1311513114  
CONECT1311713116  
CONECT1311913118  
CONECT1312013118  
CONECT1312113118  
CONECT131091311013111  
CONECT131161311413117  
CONECT1312413122131271312613125  
CONECT1312713131131281312413129  
CONECT1313113133131271313213134  
CONECT1312313122  
CONECT1312513124  
CONECT1312613124

CONNECT1312813127  
CONNECT1313013129  
CONNECT1313213131  
CONNECT1313313131  
CONNECT1313413131  
CONNECT131221312313124  
CONNECT131291312713130  
CONNECT1313713140131351313913138  
CONNECT1314013137131421314113144  
CONNECT1314413147131401314613145  
CONNECT1313613135  
CONNECT1313813137  
CONNECT1313913137  
CONNECT1314113140  
CONNECT1314313142  
CONNECT1314513144  
CONNECT1314613144  
CONNECT1314713144  
CONNECT131351313713136  
CONNECT131421314013143  
CONNECT1315013153131481315213151  
CONNECT1315313150131541315713155  
CONNECT1315713159131531315813160  
CONNECT1314913148  
CONNECT1315113150  
CONNECT1315213150  
CONNECT1315413153  
CONNECT1315613155  
CONNECT1315813157  
CONNECT1315913157  
CONNECT1316013157  
CONNECT131481315013149  
CONNECT131551315613153  
CONNECT1316313161131661316413165  
CONNECT1316613168131701316313167  
CONNECT1317013171131721316613173  
CONNECT1316213161  
CONNECT1316413163  
CONNECT1316513163  
CONNECT1316713166  
CONNECT1316913168  
CONNECT1317113170  
CONNECT1317213170  
CONNECT1317313170  
CONNECT131611316213163  
CONNECT131681316913166  
CONNECT1317613179131771317413178  
CONNECT1317913180131831317613181  
CONNECT1318313185131791318413186  
CONNECT1317513174  
CONNECT1317713176  
CONNECT1317813176  
CONNECT1318013179  
CONNECT1318213181  
CONNECT1318413183  
CONNECT1318513183  
CONNECT1318613183

CONNECT131741317613175  
CONNECT131811318213179  
CONNECT1318913191131871319213190  
CONNECT1319213189131941319613193  
CONNECT1319613197131991319213198  
CONNECT1318813187  
CONNECT1319013189  
CONNECT1319113189  
CONNECT1319313192  
CONNECT1319513194  
CONNECT1319713196  
CONNECT1319813196  
CONNECT1319913196  
CONNECT131871318913188  
CONNECT131941319513192  
CONNECT1320213200132031320413205  
CONNECT1320513207132091320213206  
CONNECT1320913211132051321013212  
CONNECT1320113200  
CONNECT1320313202  
CONNECT1320413202  
CONNECT1320613205  
CONNECT1320813207  
CONNECT1321013209  
CONNECT1321113209  
CONNECT1321213209  
CONNECT132001320213201  
CONNECT132071320813205  
CONNECT1321513217132181321313216  
CONNECT1321813222132191321513220  
CONNECT1322213224132181322513223  
CONNECT1321413213  
CONNECT1321613215  
CONNECT1321713215  
CONNECT1321913218  
CONNECT1322113220  
CONNECT1322313222  
CONNECT1322413222  
CONNECT1322513222  
CONNECT132131321413215  
CONNECT132201322113218  
CONNECT1322813230132311322913226  
CONNECT1323113233132351322813232  
CONNECT1323513237132381323113236  
CONNECT1322713226  
CONNECT1322913228  
CONNECT1323013228  
CONNECT1323213231  
CONNECT1323413233  
CONNECT1323613235  
CONNECT1323713235  
CONNECT1323813235  
CONNECT132261322713228  
CONNECT132331323413231  
CONNECT1324113239132431324413242  
CONNECT1324413246132451324813241  
CONNECT1324813251132441324913250

CONNECT1324013239  
CONNECT1324213241  
CONNECT1324313241  
CONNECT1324513244  
CONNECT1324713246  
CONNECT1324913248  
CONNECT1325013248  
CONNECT1325113248  
CONNECT132391324013241  
CONNECT132461324413247  
CONNECT1325413252132551325713256  
CONNECT1325713258132591326113254  
CONNECT1326113263132641325713262  
CONNECT1325313252  
CONNECT1325513254  
CONNECT1325613254  
CONNECT1325813257  
CONNECT1326013259  
CONNECT1326213261  
CONNECT1326313261  
CONNECT1326413261  
CONNECT132521325313254  
CONNECT132591325713260  
CONNECT1326713268132651327013269  
CONNECT1327013271132671327213274  
CONNECT1327413276132751327713270  
CONNECT1326613265  
CONNECT1326813267  
CONNECT1326913267  
CONNECT1327113270  
CONNECT1327313272  
CONNECT1327513274  
CONNECT1327613274  
CONNECT1327713274  
CONNECT132651326713266  
CONNECT132721327013273  
CONNECT1328013278132831328213281  
CONNECT1328313280132851328713284  
CONNECT1328713283132881328913290  
CONNECT1327913278  
CONNECT1328113280  
CONNECT1328213280  
CONNECT1328413283  
CONNECT1328613285  
CONNECT1328813287  
CONNECT1328913287  
CONNECT1329013287  
CONNECT132781328013279  
CONNECT132851328613283  
CONNECT1329313295132911329613294  
CONNECT1329613298133001329313297  
CONNECT1330013296133021330113303  
CONNECT1329213291  
CONNECT1329413293  
CONNECT1329513293  
CONNECT1329713296  
CONNECT1329913298

CONNECT1330113300  
CONNECT1330213300  
CONNECT1330313300  
CONNECT132911329313292  
CONNECT132981329613299  
CONNECT1330613304133071330813309  
CONNECT1330913306133111331013313  
CONNECT1331313316133091331413315  
CONNECT1330513304  
CONNECT1330713306  
CONNECT1330813306  
CONNECT1331013309  
CONNECT1331213311  
CONNECT1331413313  
CONNECT1331513313  
CONNECT1331613313  
CONNECT133041330613305  
CONNECT133111331213309  
CONNECT1331913317133211332213320  
CONNECT1332213324133231331913326  
CONNECT1332613329133281332713322  
CONNECT1331813317  
CONNECT1332013319  
CONNECT1332113319  
CONNECT1332313322  
CONNECT1332513324  
CONNECT1332713326  
CONNECT1332813326  
CONNECT1332913326  
CONNECT133171331813319  
CONNECT133241332513322  
CONNECT1333213334133301333313335  
CONNECT1333513332133371333613339  
CONNECT1333913341133421334013335  
CONNECT1333113330  
CONNECT1333313332  
CONNECT1333413332  
CONNECT1333613335  
CONNECT1333813337  
CONNECT1334013339  
CONNECT1334113339  
CONNECT1334213339  
CONNECT133301333213331  
CONNECT133371333513338  
CONNECT1334513343133481334713346  
CONNECT1334813349133451335013352  
CONNECT1335213355133481335313354  
CONNECT1334413343  
CONNECT1334613345  
CONNECT1334713345  
CONNECT1334913348  
CONNECT1335113350  
CONNECT1335313352  
CONNECT1335413352  
CONNECT1335513352  
CONNECT133431334413345  
CONNECT133501334813351



CONNECT1335813360133561336113359  
CONNECT1336113365133631335813362  
CONNECT1336513366133611336713368  
CONNECT1335713356  
CONNECT1335913358  
CONNECT1336013358  
CONNECT1336213361  
CONNECT1336413363  
CONNECT1336613365  
CONNECT1336713365  
CONNECT1336813365  
CONNECT133561335713358  
CONNECT133631336113364  
CONNECT1337113369133731337213374  
CONNECT1337413371133761337513378  
CONNECT1337813381133801337913374  
CONNECT1337013369  
CONNECT1337213371  
CONNECT1337313371  
CONNECT1337513374  
CONNECT1337713376  
CONNECT1337913378  
CONNECT1338013378  
CONNECT1338113378  
CONNECT133691337113370  
CONNECT133761337713374  
CONNECT1338413386133851338713382  
CONNECT1338713391133881338413389  
CONNECT1339113392133941338713393  
CONNECT1338313382  
CONNECT1338513384  
CONNECT1338613384  
CONNECT1338813387  
CONNECT1339013389  
CONNECT1339213391  
CONNECT1339313391  
CONNECT1339413391  
CONNECT133821338413383  
CONNECT133891339013387  
CONNECT1339713395133991340013398  
CONNECT1340013397134011340213404  
CONNECT1340413405134071340013406  
CONNECT1339613395  
CONNECT1339813397  
CONNECT1339913397  
CONNECT1340113400  
CONNECT1340313402  
CONNECT1340513404  
CONNECT1340613404  
CONNECT1340713404  
CONNECT133951339613397  
CONNECT134021340313400  
CONNECT1341013408134121341113413  
CONNECT1341313414134151341013417  
CONNECT1341713420134191341813413  
CONNECT1340913408  
CONNECT1341113410

CONNECT1341213410  
CONNECT1341413413  
CONNECT1341613415  
CONNECT1341813417  
CONNECT1341913417  
CONNECT1342013417  
CONNECT134081340913410  
CONNECT134151341613413  
CONNECT1342313426134251342113424  
CONNECT1342613423134271343013428  
CONNECT1343013431134261343213433  
CONNECT1342213421  
CONNECT1342413423  
CONNECT1342513423  
CONNECT1342713426  
CONNECT1342913428  
CONNECT1343113430  
CONNECT1343213430  
CONNECT1343313430  
CONNECT134211342313422  
CONNECT134281342613429  
CONNECT1343613437134341343913438  
CONNECT1343913443134411343613440  
CONNECT1344313446134451343913444  
CONNECT1343513434  
CONNECT1343713436  
CONNECT1343813436  
CONNECT1344013439  
CONNECT1344213441  
CONNECT1344413443  
CONNECT1344513443  
CONNECT1344613443  
CONNECT134341343513436  
CONNECT134411344213439  
CONNECT1344913452134471345013451  
CONNECT1345213454134561345313449  
CONNECT1345613452134571345813459  
CONNECT1344813447  
CONNECT1345013449  
CONNECT1345113449  
CONNECT1345313452  
CONNECT1345513454  
CONNECT1345713456  
CONNECT1345813456  
CONNECT1345913456  
CONNECT134471344913448  
CONNECT134541345213455  
CONNECT1346213463134601346513464  
CONNECT1346513462134661346713469  
CONNECT1346913470134721346513471  
CONNECT1346113460  
CONNECT1346313462  
CONNECT1346413462  
CONNECT1346613465  
CONNECT1346813467  
CONNECT1347013469  
CONNECT1347113469

CONNECT1347213469  
CONNECT134601346113462  
CONNECT134671346813465  
CONNECT1347513477134781347313476  
CONNECT1347813479134751348213480  
CONNECT1348213483134781348513484  
CONNECT1347413473  
CONNECT1347613475  
CONNECT1347713475  
CONNECT1347913478  
CONNECT1348113480  
CONNECT1348313482  
CONNECT1348413482  
CONNECT1348513482  
CONNECT134731347413475  
CONNECT134801347813481  
CONNECT1348813489134911348613490  
CONNECT1349113493134881349213495  
CONNECT1349513497134911349813496  
CONNECT1348713486  
CONNECT1348913488  
CONNECT1349013488  
CONNECT1349213491  
CONNECT1349413493  
CONNECT1349613495  
CONNECT1349713495  
CONNECT1349813495  
CONNECT134861348713488  
CONNECT134931349413491  
CONNECT1350113502135041349913503  
CONNECT1350413506135051350113508  
CONNECT1350813511135091350413510  
CONNECT1350013499  
CONNECT1350213501  
CONNECT1350313501  
CONNECT1350513504  
CONNECT1350713506  
CONNECT1350913508  
CONNECT1351013508  
CONNECT1351113508  
CONNECT134991350013501  
CONNECT135061350713504  
CONNECT1351413515135161351713512  
CONNECT1351713521135141351913518  
CONNECT1352113524135221351713523  
CONNECT1351313512  
CONNECT1351513514  
CONNECT1351613514  
CONNECT1351813517  
CONNECT1352013519  
CONNECT1352213521  
CONNECT1352313521  
CONNECT1352413521  
CONNECT135121351413513  
CONNECT135191351713520  
CONNECT1352713529135301352513528  
CONNECT1353013531135341352713532

CONNECT1353413535135301353613537  
CONNECT1352613525  
CONNECT1352813527  
CONNECT1352913527  
CONNECT1353113530  
CONNECT1353313532  
CONNECT1353513534  
CONNECT1353613534  
CONNECT1353713534  
CONNECT135251352613527  
CONNECT135321353013533  
CONNECT1354013543135381354213541  
CONNECT1354313540135441354513547  
CONNECT1354713543135491355013548  
CONNECT1353913538  
CONNECT1354113540  
CONNECT1354213540  
CONNECT1354413543  
CONNECT1354613545  
CONNECT1354813547  
CONNECT1354913547  
CONNECT1355013547  
CONNECT135381354013539  
CONNECT135451354313546  
CONNECT1355313555135541355113556  
CONNECT1355613558135601355313557  
CONNECT1356013562135631355613561  
CONNECT1355213551  
CONNECT1355413553  
CONNECT1355513553  
CONNECT1355713556  
CONNECT1355913558  
CONNECT1356113560  
CONNECT1356213560  
CONNECT1356313560  
CONNECT135511355313552  
CONNECT135581355913556  
CONNECT1356613568135641356913567  
CONNECT1356913573135661357113570  
CONNECT1357313576135691357513574  
CONNECT1356513564  
CONNECT1356713566  
CONNECT1356813566  
CONNECT1357013569  
CONNECT1357213571  
CONNECT1357413573  
CONNECT1357513573  
CONNECT1357613573  
CONNECT135641356613565  
CONNECT135711357213569  
CONNECT1357913577135801358213581  
CONNECT1358213583135841358613579  
CONNECT1358613588135891358713582  
CONNECT1357813577  
CONNECT1358013579  
CONNECT1358113579  
CONNECT1358313582

CONNECT1358513584  
CONNECT1358713586  
CONNECT1358813586  
CONNECT1358913586  
CONNECT135771357813579  
CONNECT135841358213585  
CONNECT1359213593135901359413595  
CONNECT1359513599135971359213596  
CONNECT1359913602136001360113595  
CONNECT1359113590  
CONNECT1359313592  
CONNECT1359413592  
CONNECT1359613595  
CONNECT1359813597  
CONNECT1360013599  
CONNECT1360113599  
CONNECT1360213599  
CONNECT135901359113592  
CONNECT135971359813595  
CONNECT1360513603136061360813607  
CONNECT1360813610136051360913612  
CONNECT1361213614136081361513613  
CONNECT1360413603  
CONNECT1360613605  
CONNECT1360713605  
CONNECT1360913608  
CONNECT1361113610  
CONNECT1361313612  
CONNECT1361413612  
CONNECT1361513612  
CONNECT136031360513604  
CONNECT136101361113608  
CONNECT1361813616136201361913621  
CONNECT1362113623136221362513618  
CONNECT1362513628136261362713621  
CONNECT1361713616  
CONNECT1361913618  
CONNECT1362013618  
CONNECT1362213621  
CONNECT1362413623  
CONNECT1362613625  
CONNECT1362713625  
CONNECT1362813625  
CONNECT136161361713618  
CONNECT136231362413621  
CONNECT1363113632136291363313634  
CONNECT1363413631136351363813636  
CONNECT1363813639136401364113634  
CONNECT1363013629  
CONNECT1363213631  
CONNECT1363313631  
CONNECT1363513634  
CONNECT1363713636  
CONNECT1363913638  
CONNECT1364013638  
CONNECT1364113638  
CONNECT136291363013631

CONNECT136361363413637  
CONNECT1364413645136461364213647  
CONNECT1364713649136441365113648  
CONNECT1365113653136521365413647  
CONNECT1364313642  
CONNECT1364513644  
CONNECT1364613644  
CONNECT1364813647  
CONNECT1365013649  
CONNECT1365213651  
CONNECT1365313651  
CONNECT1365413651  
CONNECT136421364413643  
CONNECT136491365013647  
CONNECT1365713660136551365913658  
CONNECT1366013664136621366113657  
CONNECT1366413660136651366613667  
CONNECT1365613655  
CONNECT1365813657  
CONNECT1365913657  
CONNECT1366113660  
CONNECT1366313662  
CONNECT1366513664  
CONNECT1366613664  
CONNECT1366713664  
CONNECT136551365613657  
CONNECT136621366013663  
CONNECT1367013671136721366813673  
CONNECT1367313675136701367413677  
CONNECT1367713679136781368013673  
CONNECT1366913668  
CONNECT1367113670  
CONNECT1367213670  
CONNECT1367413673  
CONNECT1367613675  
CONNECT1367813677  
CONNECT1367913677  
CONNECT1368013677  
CONNECT136681366913670  
CONNECT136751367313676  
CONNECT1368313686136851368413681  
CONNECT1368613690136871368813683  
CONNECT1369013693136861369113692  
CONNECT1368213681  
CONNECT1368413683  
CONNECT1368513683  
CONNECT1368713686  
CONNECT1368913688  
CONNECT1369113690  
CONNECT1369213690  
CONNECT1369313690  
CONNECT136811368213683  
CONNECT136881368613689  
CONNECT1369613698136991369413697  
CONNECT1369913696137001370313701  
CONNECT1370313704136991370513706  
CONNECT1369513694

CONNECT1369713696  
CONNECT1369813696  
CONNECT1370013699  
CONNECT1370213701  
CONNECT1370413703  
CONNECT1370513703  
CONNECT1370613703  
CONNECT136941369613695  
CONNECT137011369913702  
CONNECT1370913707137111371013712  
CONNECT1371213713137141370913716  
CONNECT1371613717137191371813712  
CONNECT1370813707  
CONNECT1371013709  
CONNECT1371113709  
CONNECT1371313712  
CONNECT1371513714  
CONNECT1371713716  
CONNECT1371813716  
CONNECT1371913716  
CONNECT137071370813709  
CONNECT137141371513712  
CONNECT1372213723137241372013725  
CONNECT1372513729137261372213727  
CONNECT1372913730137251373213731  
CONNECT1372113720  
CONNECT1372313722  
CONNECT1372413722  
CONNECT1372613725  
CONNECT1372813727  
CONNECT1373013729  
CONNECT1373113729  
CONNECT1373213729  
CONNECT137201372113722  
CONNECT137271372513728  
CONNECT1373513736137331373713738  
CONNECT1373813739137421373513740  
CONNECT1374213744137451373813743  
CONNECT1373413733  
CONNECT1373613735  
CONNECT1373713735  
CONNECT1373913738  
CONNECT1374113740  
CONNECT1374313742  
CONNECT1374413742  
CONNECT1374513742  
CONNECT137331373513734  
CONNECT137401373813741  
CONNECT1374813746137501374913751  
CONNECT1375113752137551375313748  
CONNECT1375513757137581375113756  
CONNECT1374713746  
CONNECT1374913748  
CONNECT1375013748  
CONNECT1375213751  
CONNECT1375413753  
CONNECT1375613755

CONNECT1375713755  
CONNECT1375813755  
CONNECT137461374713748  
CONNECT137531375113754  
CONNECT1376113764137591376313762  
CONNECT1376413768137611376613765  
CONNECT1376813764137701377113769  
CONNECT1376013759  
CONNECT1376213761  
CONNECT1376313761  
CONNECT1376513764  
CONNECT1376713766  
CONNECT1376913768  
CONNECT1377013768  
CONNECT1377113768  
CONNECT137591376113760  
CONNECT137661376413767  
CONNECT1377413776137751377213777  
CONNECT1377713781137791377413778  
CONNECT1378113783137821377713784  
CONNECT1377313772  
CONNECT1377513774  
CONNECT1377613774  
CONNECT1377813777  
CONNECT1378013779  
CONNECT1378213781  
CONNECT1378313781  
CONNECT1378413781  
CONNECT137721377313774  
CONNECT137791377713780  
CONNECT1378713788137891379013785  
CONNECT1379013792137871379113794  
CONNECT1379413795137961379013797  
CONNECT1378613785  
CONNECT1378813787  
CONNECT1378913787  
CONNECT1379113790  
CONNECT1379313792  
CONNECT1379513794  
CONNECT1379613794  
CONNECT1379713794  
CONNECT137851378613787  
CONNECT137921379313790  
CONNECT1380013798138021380113803  
CONNECT1380313804138051380013807  
CONNECT1380713810138031380913808  
CONNECT1379913798  
CONNECT1380113800  
CONNECT1380213800  
CONNECT1380413803  
CONNECT1380613805  
CONNECT1380813807  
CONNECT1380913807  
CONNECT1381013807  
CONNECT137981380013799  
CONNECT138051380313806  
CONNECT1381313814138151381113816



CONECT1381613818138201381713813  
CONECT1382013823138161382213821  
CONECT1381213811  
CONECT1381413813  
CONECT1381513813  
CONECT1381713816  
CONECT1381913818  
CONECT1382113820  
CONECT1382213820  
CONECT1382313820  
CONECT138111381213813  
CONECT138181381913816  
CONECT1382613829138271382413828  
CONECT1382913831138301383313826  
CONECT1383313829138361383413835  
CONECT1382513824  
CONECT1382713826  
CONECT1382813826  
CONECT1383013829  
CONECT1383213831  
CONECT1383413833  
CONECT1383513833  
CONECT1383613833  
CONECT138241382513826  
CONECT138311382913832  
CONECT1383913842138371384013841  
CONECT1384213846138391384313844  
CONECT1384613842138481384913847  
CONECT1383813837  
CONECT1384013839  
CONECT1384113839  
CONECT1384313842  
CONECT1384513844  
CONECT1384713846  
CONECT1384813846  
CONECT1384913846  
CONECT138371383813839  
CONECT138441384213845  
CONECT1385213853138551385413850  
CONECT1385513852138571385913856  
CONECT1385913862138551386113860  
CONECT1385113850  
CONECT1385313852  
CONECT1385413852  
CONECT1385613855  
CONECT1385813857  
CONECT1386013859  
CONECT1386113859  
CONECT1386213859  
CONECT138501385213851  
CONECT138571385813855  
CONECT1386513863138681386713866  
CONECT1386813869138651387213870  
CONECT1387213873138681387413875  
CONECT1386413863  
CONECT1386613865  
CONECT1386713865

CONNECT1386913868  
CONNECT1387113870  
CONNECT1387313872  
CONNECT1387413872  
CONNECT1387513872  
CONNECT138631386513864  
CONNECT138701387113868  
CONNECT1387813879138761388113880  
CONNECT1388113878138851388213883  
CONNECT1388513888138811388613887  
CONNECT1387713876  
CONNECT1387913878  
CONNECT1388013878  
CONNECT1388213881  
CONNECT1388413883  
CONNECT1388613885  
CONNECT1388713885  
CONNECT1388813885  
CONNECT138761387813877  
CONNECT138831388113884  
CONNECT1389113893138891389213894  
CONNECT1389413895138961389113898  
CONNECT1389813899139001390113894  
CONNECT1389013889  
CONNECT1389213891  
CONNECT1389313891  
CONNECT1389513894  
CONNECT1389713896  
CONNECT1389913898  
CONNECT1390013898  
CONNECT1390113898  
CONNECT138891389013891  
CONNECT138961389713894  
CONNECT1390413902139051390613907  
CONNECT1390713908139091391113904  
CONNECT1391113913139071391213914  
CONNECT1390313902  
CONNECT1390513904  
CONNECT1390613904  
CONNECT1390813907  
CONNECT1391013909  
CONNECT1391213911  
CONNECT1391313911  
CONNECT1391413911  
CONNECT139021390313904  
CONNECT139091391013907  
CONNECT1391713918139191391513920  
CONNECT1392013917139241392113922  
CONNECT1392413925139261392713920  
CONNECT1391613915  
CONNECT1391813917  
CONNECT1391913917  
CONNECT1392113920  
CONNECT1392313922  
CONNECT1392513924  
CONNECT1392613924  
CONNECT1392713924

CONNECT139151391713916  
CONNECT139221392313920  
CONNECT1393013931139281393213933  
CONNECT1393313935139301393713934  
CONNECT1393713938139401393313939  
CONNECT1392913928  
CONNECT1393113930  
CONNECT1393213930  
CONNECT1393413933  
CONNECT1393613935  
CONNECT1393813937  
CONNECT1393913937  
CONNECT1394013937  
CONNECT139281392913930  
CONNECT139351393613933  
CONNECT1394313944139451394113946  
CONNECT1394613943139481394713950  
CONNECT1395013953139511394613952  
CONNECT1394213941  
CONNECT1394413943  
CONNECT1394513943  
CONNECT1394713946  
CONNECT1394913948  
CONNECT1395113950  
CONNECT1395213950  
CONNECT1395313950  
CONNECT139411394313942  
CONNECT139481394913946  
CONNECT1395613959139571395413958  
CONNECT1395913960139561396113963  
CONNECT1396313964139591396613965  
CONNECT1395513954  
CONNECT1395713956  
CONNECT1395813956  
CONNECT1396013959  
CONNECT1396213961  
CONNECT1396413963  
CONNECT1396513963  
CONNECT1396613963  
CONNECT139541395513956  
CONNECT139611395913962  
CONNECT1396913972139711396713970  
CONNECT1397213976139691397313974  
CONNECT1397613972139771397813979  
CONNECT1396813967  
CONNECT1397013969  
CONNECT1397113969  
CONNECT1397313972  
CONNECT1397513974  
CONNECT1397713976  
CONNECT1397813976  
CONNECT1397913976  
CONNECT139671396813969  
CONNECT139741397513972  
CONNECT1398213980139831398413985  
CONNECT1398513986139871398913982  
CONNECT1398913992139901398513991

CONNECT1398113980  
CONNECT1398313982  
CONNECT1398413982  
CONNECT1398613985  
CONNECT1398813987  
CONNECT1399013989  
CONNECT1399113989  
CONNECT1399213989  
CONNECT139801398113982  
CONNECT139871398813985  
CONNECT1399513996139971399813993  
CONNECT1399813999140021399514000  
CONNECT1400214004140031399814005  
CONNECT1399413993  
CONNECT1399613995  
CONNECT1399713995  
CONNECT1399913998  
CONNECT1400114000  
CONNECT1400314002  
CONNECT1400414002  
CONNECT1400514002  
CONNECT139931399413995  
CONNECT140001400113998  
CONNECT1400814011140061401014009  
CONNECT1401114012140081401314015  
CONNECT1401514016140181401114017  
CONNECT1400714006  
CONNECT1400914008  
CONNECT1401014008  
CONNECT1401214011  
CONNECT1401414013  
CONNECT1401614015  
CONNECT1401714015  
CONNECT1401814015  
CONNECT140061400714008  
CONNECT140131401114014  
CONNECT1402114023140241402214019  
CONNECT1402414026140251402814021  
CONNECT1402814024140291403014031  
CONNECT1402014019  
CONNECT1402214021  
CONNECT1402314021  
CONNECT1402514024  
CONNECT1402714026  
CONNECT1402914028  
CONNECT1403014028  
CONNECT1403114028  
CONNECT140191402114020  
CONNECT140261402414027  
CONNECT1403414032140361403514037  
CONNECT1403714039140341403814041  
CONNECT1404114043140371404414042  
CONNECT1403314032  
CONNECT1403514034  
CONNECT1403614034  
CONNECT1403814037  
CONNECT1404014039

CONNECT1404214041  
CONNECT1404314041  
CONNECT1404414041  
CONNECT140321403414033  
CONNECT140391404014037  
CONNECT1404714045140481405014049  
CONNECT1405014047140511405214054  
CONNECT1405414057140561405014055  
CONNECT1404614045  
CONNECT1404814047  
CONNECT1404914047  
CONNECT1405114050  
CONNECT1405314052  
CONNECT1405514054  
CONNECT1405614054  
CONNECT1405714054  
CONNECT140451404714046  
CONNECT140521405314050  
CONNECT1406014062140581406114063  
CONNECT1406314067140601406514064  
CONNECT1406714069140701406814063  
CONNECT1405914058  
CONNECT1406114060  
CONNECT1406214060  
CONNECT1406414063  
CONNECT1406614065  
CONNECT1406814067  
CONNECT1406914067  
CONNECT1407014067  
CONNECT140581405914060  
CONNECT140651406614063  
CONNECT1407314075140711407614074  
CONNECT1407614077140781407314080  
CONNECT1408014081140831408214076  
CONNECT1407214071  
CONNECT1407414073  
CONNECT1407514073  
CONNECT1407714076  
CONNECT1407914078  
CONNECT1408114080  
CONNECT1408214080  
CONNECT1408314080  
CONNECT140711407214073  
CONNECT140781407914076  
CONNECT1408614089140881408414087  
CONNECT1408914090140861409114093  
CONNECT1409314094140951408914096  
CONNECT1408514084  
CONNECT1408714086  
CONNECT1408814086  
CONNECT1409014089  
CONNECT1409214091  
CONNECT1409414093  
CONNECT1409514093  
CONNECT1409614093  
CONNECT140841408614085  
CONNECT140911408914092

CONECT1409914102141001410114097  
CONECT1410214104141061409914103  
CONECT1410614102141091410814107  
CONECT1409814097  
CONECT1410014099  
CONECT1410114099  
CONECT1410314102  
CONECT1410514104  
CONECT1410714106  
CONECT1410814106  
CONECT1410914106  
CONECT140971409814099  
CONECT141041410214105  
CONECT1411214113141151411014114  
CONECT1411514116141191411714112  
CONECT1411914120141151412114122  
CONECT1411114110  
CONECT1411314112  
CONECT1411414112  
CONECT1411614115  
CONECT1411814117  
CONECT1412014119  
CONECT1412114119  
CONECT1412214119  
CONECT141101411114112  
CONECT141171411514118  
CONECT1412514123141261412814127  
CONECT1412814130141291412514132  
CONECT1413214133141281413414135  
CONECT1412414123  
CONECT1412614125  
CONECT1412714125  
CONECT1412914128  
CONECT1413114130  
CONECT1413314132  
CONECT1413414132  
CONECT1413514132  
CONECT141231412414125  
CONECT141301412814131  
CONECT1413814140141361414114139  
CONECT1414114145141381414214143  
CONECT1414514148141411414614147  
CONECT1413714136  
CONECT1413914138  
CONECT1414014138  
CONECT1414214141  
CONECT1414414143  
CONECT1414614145  
CONECT1414714145  
CONECT1414814145  
CONECT141361413814137  
CONECT141431414414141  
CONECT1415114153141541415214149  
CONECT1415414156141551415114158  
CONECT1415814160141591415414161  
CONECT1415014149  
CONECT1415214151

CONECT1415314151  
CONECT1415514154  
CONECT1415714156  
CONECT1415914158  
CONECT1416014158  
CONECT1416114158  
CONECT141491415014151  
CONECT141561415414157  
CONECT1416414165141661416214167  
CONECT1416714169141711416414168  
CONECT1417114172141731416714174  
CONECT1416314162  
CONECT1416514164  
CONECT1416614164  
CONECT1416814167  
CONECT1417014169  
CONECT1417214171  
CONECT1417314171  
CONECT1417414171  
CONECT141621416414163  
CONECT141691417014167  
CONECT1417714180141791417514178  
CONECT1418014177141811418214184  
CONECT1418414180141851418614187  
CONECT1417614175  
CONECT1417814177  
CONECT1417914177  
CONECT1418114180  
CONECT1418314182  
CONECT1418514184  
CONECT1418614184  
CONECT1418714184  
CONECT141751417614177  
CONECT141821418014183  
END
